# Supplementary material
Source: PubMed Central journal article supplement (PMC8992238)
Supplement: ciac203_suppl_supplementary_table_s3.pdf [file ciac203_suppl_supplementary_table_s3.pdf]

We gratefully acknowledge the following Authors from the Originating laboratories responsible for obtaining the specimens, as well as the Submitting laboratories where the genome data were generated and shared via GISAID, on which this research is based.

All Submitters of data may be contacted directly via [www.gisaid.org](http://www.gisaid.org)

Authors are sorted alphabetically.

| Accession ID                                                                                                                                                                                                                                                                                                                                                                                                                                                                                                             | Originating Laboratory                                                                                                                    | Submitting Laboratory                                                                                                                                                                        | Authors                                                                                                                                                                                                                                                                                                                                                                                                                                                                                                                                                                                                                                                                                                                                                                                                                                                                                                                                                                                                                                                                                                                                                                                                                                                                                                                                                                                                                                                                                                                                                                                                                                                                                                                                                                                                                                                                                                                                                                                          |
|--------------------------------------------------------------------------------------------------------------------------------------------------------------------------------------------------------------------------------------------------------------------------------------------------------------------------------------------------------------------------------------------------------------------------------------------------------------------------------------------------------------------------|-------------------------------------------------------------------------------------------------------------------------------------------|----------------------------------------------------------------------------------------------------------------------------------------------------------------------------------------------|--------------------------------------------------------------------------------------------------------------------------------------------------------------------------------------------------------------------------------------------------------------------------------------------------------------------------------------------------------------------------------------------------------------------------------------------------------------------------------------------------------------------------------------------------------------------------------------------------------------------------------------------------------------------------------------------------------------------------------------------------------------------------------------------------------------------------------------------------------------------------------------------------------------------------------------------------------------------------------------------------------------------------------------------------------------------------------------------------------------------------------------------------------------------------------------------------------------------------------------------------------------------------------------------------------------------------------------------------------------------------------------------------------------------------------------------------------------------------------------------------------------------------------------------------------------------------------------------------------------------------------------------------------------------------------------------------------------------------------------------------------------------------------------------------------------------------------------------------------------------------------------------------------------------------------------------------------------------------------------------------|
| EPI_ISL_9366684, EPI_ISL_9366685, EPI_ISL_9366706, EPI_ISL_9366716, EPI_ISL_9366719, EPI_ISL_9429893, EPI_ISL_9430048<br>see above                                                                                                                                                                                                                                                                                                                                                                                       | "CBR,IISc"                                                                                                                                | CBR,IISc                                                                                                                                                                                     | "Bratati Kahali"                                                                                                                                                                                                                                                                                                                                                                                                                                                                                                                                                                                                                                                                                                                                                                                                                                                                                                                                                                                                                                                                                                                                                                                                                                                                                                                                                                                                                                                                                                                                                                                                                                                                                                                                                                                                                                                                                                                                                                                 |
| EPI_ISL_9679267, EPI_ISL_9679276, EPI_ISL_9679278, EPI_ISL_9679292, EPI_ISL_9679294, EPI_ISL_9679334, EPI_ISL_9679368, EPI_ISL_9679382, EPI_ISL_9679446, EPI_ISL_9679699<br>see above                                                                                                                                                                                                                                                                                                                                    | AMPATH                                                                                                                                    | National Institute for Communicable Diseases of the National Health Laboratory Service                                                                                                       | Amoako DG; Bhiman JN; Everatt J; Ismail A; Kekana D; Mahlungu B; Mnguni A; Mohale T; Ntuli N; Scheepers C; Wolter N                                                                                                                                                                                                                                                                                                                                                                                                                                                                                                                                                                                                                                                                                                                                                                                                                                                                                                                                                                                                                                                                                                                                                                                                                                                                                                                                                                                                                                                                                                                                                                                                                                                                                                                                                                                                                                                                              |
| EPI_ISL_9232086, EPI_ISL_9232090, EPI_ISL_9232091, EPI_ISL_9232155, EPI_ISL_9232278, EPI_ISL_9232279, EPI_ISL_9728879, EPI_ISL_9728905, EPI_ISL_9728916, EPI_ISL_9728919<br>see above                                                                                                                                                                                                                                                                                                                                    | AP SSO                                                                                                                                    | CSIR-Centre for Cellular and Molecular Biology-INSACOG                                                                                                                                       | Amareshwar Vodapalli; Ara Sreenivas; Archana Bharadwaj Siva; B Himasri; Divya Tej Sowpati; Jandhyala Sai Krishna; Karthik Bharadwaj Tallapaka; Lamuk Zaveri; Malini Nemalikanti; Priya Nurkurthy; Rakesh K Mishra; Shreekanth Verma; Sreelekshmi MS; Sumedha Advadhanula; Surabhi Srivastava; Tulasi Nagabandi; Valli Nagalakshmi Undamata; Vidhyadhari Methuku                                                                                                                                                                                                                                                                                                                                                                                                                                                                                                                                                                                                                                                                                                                                                                                                                                                                                                                                                                                                                                                                                                                                                                                                                                                                                                                                                                                                                                                                                                                                                                                                                                  |
| EPI_ISL_8744112, EPI_ISL_8930377, EPI_ISL_8930378<br>EPI_ISL_9091838, EPI_ISL_9091844, EPI_ISL_9091845                                                                                                                                                                                                                                                                                                                                                                                                                   | APRL Pathlabs Pvt. Ltd, Vadodara<br>AREKERE MATERNITY CARE                                                                                | Gujarat Biotechnology Research Centre<br>National Center for Biological Sciences, TIFR - Rockefeller Foundation                                                                              | Akhilesh Modi; Apurvashin Puvar; Bhadreshsinh Gohil; Chaitanya Joshi; Disha Vora; Janvi Raval; Jaykumar Rangani; Madhvi Joshi; Manisha Rana; Nimesh Patel; Nitin Savaliya; Nitin Shukla; Priyank Chavda; Ramesh Pandit; Roshani Mishra; Sonal Sharma; Tasnim Trivedi; Zarna Patel<br>Awadhesh Pandit; Bhagyashree Madhav Shelar; Darshan Sreenivas; Dimple Notani; Kathirvel Kandasamy; Lakshminarayanan CP; Satyajit Mayor; Uma Ramakrishnan                                                                                                                                                                                                                                                                                                                                                                                                                                                                                                                                                                                                                                                                                                                                                                                                                                                                                                                                                                                                                                                                                                                                                                                                                                                                                                                                                                                                                                                                                                                                                    |
| EPI_ISL_9324342, EPI_ISL_9324340, EPI_ISL_8381364, EPI_ISL_8552310                                                                                                                                                                                                                                                                                                                                                                                                                                                       | ASTER LABS SARJAPUR ROAD<br>ASTER R V<br>AZDelta                                                                                          | inStem, NCBS-INSACOG<br>inStem, NCBS-INSACOG<br>AZ Delta Medical Laboratories in Roeselare, Belgium                                                                                          | Aswin SaiNarain; Dasaradhi Palakodeti; Uma Ramakrishnan<br>Aswin SaiNarain; Dasaradhi Palakodeti; Uma Ramakrishnan<br>Dieter De Smet; Frederik Van Hoecke; Geert Martens; on behalf of AZ Delta COVID-19 Genomics core (member of Genomic surveillance of SARS-CoV-2 in Belgium network)                                                                                                                                                                                                                                                                                                                                                                                                                                                                                                                                                                                                                                                                                                                                                                                                                                                                                                                                                                                                                                                                                                                                                                                                                                                                                                                                                                                                                                                                                                                                                                                                                                                                                                         |
| EPI_ISL_8769585                                                                                                                                                                                                                                                                                                                                                                                                                                                                                                          | Advanced Genomics Institute and Laboratory Medicine                                                                                       | ILBS                                                                                                                                                                                         | Arjun Bhugra; Chhagan Bihari Sharma; Ekta Gupta; Pramod Gautam; Rahul Garg; Reshu Agarwal; Shiv Kumar Sarin; Urvinder Kaur; Varun Suroliya                                                                                                                                                                                                                                                                                                                                                                                                                                                                                                                                                                                                                                                                                                                                                                                                                                                                                                                                                                                                                                                                                                                                                                                                                                                                                                                                                                                                                                                                                                                                                                                                                                                                                                                                                                                                                                                       |
| EPI_ISL_8930210, EPI_ISL_8930246, EPI_ISL_8930307, EPI_ISL_8930315                                                                                                                                                                                                                                                                                                                                                                                                                                                       | Akademiska Sjukhuset, Clinical Microbiology and Hospital Hygiene                                                                          | Akademiska Sjukhuset, Clinical Microbiology and Hospital Hygiene                                                                                                                             | Jonathan Haars; Julia Bergholm; Patrik Ellström; Rene Kaden; Steinar Mannsverk                                                                                                                                                                                                                                                                                                                                                                                                                                                                                                                                                                                                                                                                                                                                                                                                                                                                                                                                                                                                                                                                                                                                                                                                                                                                                                                                                                                                                                                                                                                                                                                                                                                                                                                                                                                                                                                                                                                   |
| EPI_ISL_8146350                                                                                                                                                                                                                                                                                                                                                                                                                                                                                                          | Akademiska Sjukhuset, Clinical Microbiology and Hospital Hygiene                                                                          | Uppsala University Hospital                                                                                                                                                                  | Jonathan Haars; Julia Bergholm; Patrik Ellström; Rene Kaden; Steinar Mannsverk                                                                                                                                                                                                                                                                                                                                                                                                                                                                                                                                                                                                                                                                                                                                                                                                                                                                                                                                                                                                                                                                                                                                                                                                                                                                                                                                                                                                                                                                                                                                                                                                                                                                                                                                                                                                                                                                                                                   |
| EPI_ISL_8281563                                                                                                                                                                                                                                                                                                                                                                                                                                                                                                          | Allergy, Immunology and Cell Biology Unit (AICBU)                                                                                         | Allergy, Immunology and Cell Biology Unit (AICBU)                                                                                                                                            | Aysha Wijesinghe; Chandima Jeewandara; Deshni Jayathilaka; Dinuka Ariyaratne; Diyanath Ranasinghe; Dumni Gusinghe; Farha Bary; Gathsaurie Neelika Malavige; Heshan Kuruppu; Tibutius Thanesh                                                                                                                                                                                                                                                                                                                                                                                                                                                                                                                                                                                                                                                                                                                                                                                                                                                                                                                                                                                                                                                                                                                                                                                                                                                                                                                                                                                                                                                                                                                                                                                                                                                                                                                                                                                                     |
| EPI_ISL_9322828, EPI_ISL_9322830, EPI_ISL_9322833, EPI_ISL_9322834, EPI_ISL_9322835, EPI_ISL_9322836<br>EPI_ISL_9324447                                                                                                                                                                                                                                                                                                                                                                                                  | Allied Care Expert - Valenzuela<br>Amang Rodriguez Memorial Medical Center                                                                | Philippine Genome Center<br>Philippine Genome Center                                                                                                                                         | Alethea R. de Guzman; Alyssa Joyce E. Telles; Angelica A. Garcia; Anna Ong-Lim; Benedict A. Maralit; Carlo M. Lapid; Celia Carlos; Cynthia P. Saloma; Devon Ray Pacial; Diomedes A. Cariño; Edsel Maurice Salvana; El King D. Morado; Elcid Aaron R. Pangilinan; Eva Maria Cutiongo-de la Paz; Francis A. Tablizo; Henrietta Marie Rodriguez; Jaime C. Montoya; Jan Michael C. Yap; Jarvin E. Nipales; Jo-Hannah S. Llamas; John Michael Egana; John Q. Wong; Johnny A. Ong; Joshua Gregor A. Dizon; Joshua Jose Endozo; Karol Sophia Agape R. Padilla; Kris P. Punayan; Kristina Patriz Dela Cruz; Lindsay Clare D.L. Carandang; Ma. Exanil Plantig; Marc Edsel C. Ayes; Maria Rosario Singh-Vergeire; Maria Sofia L. Yangzon; Marielle M. Gamboa; Marissa Alejandria; Niña Francesca Bustamante; Razel Nikka M. Hao; Renato Jacinto Q. Mantaring; Rianna Patricia S. Cruz; Rizel A. Medina; Shiela Mae M. Araiza; Yvonne Valerie Austria; Zipporah Mariebelle R. Enriquez; Zryel V. Mollejon<br>Alethea R. de Guzman; Alyssa Joyce E. Telles; Angelica A. Garcia; Anna Ong-Lim; Benedict A. Maralit; Carlo M. Lapid; Celia Carlos; Cynthia P. Saloma; Devon Ray Pacial; Diomedes A. Cariño; Edsel Maurice Salvana; El King D. Morado; Elcid Aaron R. Pangilinan; Eva Maria Cutiongo-de la Paz; Francis A. Tablizo; Henrietta Marie Rodriguez; Jaime C. Montoya; Jan Michael C. Yap; Jarvin E. Nipales; Jo-Hannah S. Llamas; John Michael Egana; John Q. Wong; Johnny A. Ong; Joshua Gregor A. Dizon; Joshua Jose Endozo; Karol Sophia Agape R. Padilla; Kris P. Punayan; Kristina Patriz Dela Cruz; Lindsay Clare D.L. Carandang; Ma. Exanil Plantig; Marc Edsel C. Ayes; Maria Rosario Singh-Vergeire; Maria Sofia L. Yangzon; Marielle M. Gamboa; Marissa Alejandria; Niña Francesca Bustamante; Razel Nikka M. Hao; Renato Jacinto Q. Mantaring; Rianna Patricia S. Cruz; Rizel A. Medina; Shiela Mae M. Araiza; Yvonne Valerie Austria; Zipporah Mariebelle R. Enriquez; Zryel V. Mollejon |
| EPI_ISL_9323440, EPI_ISL_9323441, EPI_ISL_9323442, EPI_ISL_9323443, EPI_ISL_9323444, EPI_ISL_9323445, EPI_ISL_9323446, EPI_ISL_9323447, EPI_ISL_9323448, EPI_ISL_9323449, EPI_ISL_9323450, EPI_ISL_9323451, EPI_ISL_9323452, EPI_ISL_9323453, EPI_ISL_9323454, EPI_ISL_9323455, EPI_ISL_9323456, EPI_ISL_9323457, EPI_ISL_9323458, EPI_ISL_9323459, EPI_ISL_9323460, EPI_ISL_9323461, EPI_ISL_9323462, EPI_ISL_9323463, EPI_ISL_9323464, EPI_ISL_9323465, EPI_ISL_9323466, EPI_ISL_9323467, EPI_ISL_9323468<br>see above | Amospus Seamen's Hospital                                                                                                                 | Philippine Genome Center                                                                                                                                                                     | Alethea R. de Guzman; Alyssa Joyce E. Telles; Angelica A. Garcia; Anna Ong-Lim; Benedict A. Maralit; Carlo M. Lapid; Celia Carlos; Cynthia P. Saloma; Devon Ray Pacial; Diomedes A. Cariño; Edsel Maurice Salvana; El King D. Morado; Elcid Aaron R. Pangilinan; Eva Maria Cutiongo-de la Paz; Francis A. Tablizo; Henrietta Marie Rodriguez; Jaime C. Montoya; Jan Michael C. Yap; Jarvin E. Nipales; Jo-Hannah S. Llamas; John Michael Egana; John Q. Wong; Johnny A. Ong; Joshua Gregor A. Dizon; Joshua Jose Endozo; Karol Sophia Agape R. Padilla; Kris P. Punayan; Kristina Patriz Dela Cruz; Lindsay Clare D.L. Carandang; Ma. Exanil Plantig; Marc Edsel C. Ayes; Maria Rosario Singh-Vergeire; Maria Sofia L. Yangzon; Marielle M. Gamboa; Marissa Alejandria; Niña Francesca Bustamante; Razel Nikka M. Hao; Renato Jacinto Q. Mantaring; Rianna Patricia S. Cruz; Rizel A. Medina; Shiela Mae M. Araiza; Yvonne Valerie Austria; Zipporah Mariebelle R. Enriquez; Zryel V. Mollejon                                                                                                                                                                                                                                                                                                                                                                                                                                                                                                                                                                                                                                                                                                                                                                                                                                                                                                                                                                                                   |
| EPI_ISL_9322873, EPI_ISL_9322874, EPI_ISL_9322875, EPI_ISL_9322876, EPI_ISL_9322877, EPI_ISL_9322878, EPI_ISL_9322879, EPI_ISL_9322881, EPI_ISL_9322882, EPI_ISL_9322883, EPI_ISL_9322884, EPI_ISL_9322885, EPI_ISL_9322886, EPI_ISL_9322887, EPI_ISL_9322888, EPI_ISL_9322889, EPI_ISL_9322890, EPI_ISL_9322891, EPI_ISL_9322892<br>see above                                                                                                                                                                           | Army General Hospital Molecular Laboratory (AGHML)                                                                                        | Philippine Genome Center                                                                                                                                                                     | Alethea R. de Guzman; Alyssa Joyce E. Telles; Angelica A. Garcia; Anna Ong-Lim; Benedict A. Maralit; Carlo M. Lapid; Celia Carlos; Cynthia P. Saloma; Devon Ray Pacial; Diomedes A. Cariño; Edsel Maurice Salvana; El King D. Morado; Elcid Aaron R. Pangilinan; Eva Maria Cutiongo-de la Paz; Francis A. Tablizo; Henrietta Marie Rodriguez; Jaime C. Montoya; Jan Michael C. Yap; Jarvin E. Nipales; Jo-Hannah S. Llamas; John Michael Egana; John Q. Wong; Johnny A. Ong; Joshua Gregor A. Dizon; Joshua Jose Endozo; Karol Sophia Agape R. Padilla; Kris P. Punayan; Kristina Patriz Dela Cruz; Lindsay Clare D.L. Carandang; Ma. Exanil Plantig; Marc Edsel C. Ayes; Maria Rosario Singh-Vergeire; Maria Sofia L. Yangzon; Marielle M. Gamboa; Marissa Alejandria; Niña Francesca Bustamante; Razel Nikka M. Hao; Renato Jacinto Q. Mantaring; Rianna Patricia S. Cruz; Rizel A. Medina; Shiela Mae M. Araiza; Yvonne Valerie Austria; Zipporah Mariebelle R. Enriquez; Zryel V. Mollejon                                                                                                                                                                                                                                                                                                                                                                                                                                                                                                                                                                                                                                                                                                                                                                                                                                                                                                                                                                                                   |
| EPI_ISL_9091856, EPI_ISL_9091860, EPI_ISL_9091873<br>EPI_ISL_9091058, EPI_ISL_9091059, EPI_ISL_9091068, EPI_ISL_9091079, EPI_ISL_9091100, EPI_ISL_9091113                                                                                                                                                                                                                                                                                                                                                                | Auriga Research Pvt Ltd, Laboratory, Bengaluru<br>BANGALORE MEDICAL COLLEGE AND RESEARCH INSTITUTE VRDL (BMCRI), VICTORIA HOSPITAL CAMPUS | National Center for Biological Sciences, TIFR - Rockefeller Foundation<br>National Center for Biological Sciences, TIFR - Rockefeller Foundation                                             | Awadhesh Pandit; Bhagyashree Madhav Shelar; Darshan Sreenivas; Dimple Notani; Kathirvel Kandasamy; Lakshminarayanan CP; Satyajit Mayor; Uma Ramakrishnan<br>Awadhesh Pandit; Bhagyashree Madhav Shelar; Darshan Sreenivas; Dimple Notani; Kathirvel Kandasamy; Lakshminarayanan CP; Satyajit Mayor; Uma Ramakrishnan                                                                                                                                                                                                                                                                                                                                                                                                                                                                                                                                                                                                                                                                                                                                                                                                                                                                                                                                                                                                                                                                                                                                                                                                                                                                                                                                                                                                                                                                                                                                                                                                                                                                             |
| EPI_ISL_9177591<br>EPI_ISL_9092128<br>EPI_ISL_9091850                                                                                                                                                                                                                                                                                                                                                                                                                                                                    | BAUJAN RURAL HEALTH II<br>BBMP<br>BBMP MAHADEVPURA ZONE                                                                                   | Research Institute for Tropical Medicine<br>National Center for Biological Sciences, TIFR - Rockefeller Foundation<br>National Center for Biological Sciences, TIFR - Rockefeller Foundation | Alexander Sadiasa; Anne Pauline A. Alpino; Ardiane Ysabelle M. Dolor; Catalino S. Demetria; Criselda T. Bautista; Francisco Gerardo M. Polotan; Jefferson Earl J. Halog; Joseph Hughes; Kirstyn Brunker; Lei Lanna M. Dancel; Ma. Angelica A. Tujan; Mayan Uy-Lumandas; Othoniel Jan T. Onza; Simon Daldry; Timothy John R. Dizon; Vina Lea F. Arguelles; Yao-Tsun Li<br>Awadhesh Pandit; Bhagyashree Madhav Shelar; Darshan Sreenivas; Dimple Notani; Kathirvel Kandasamy; Lakshminarayanan CP; Satyajit Mayor; Uma Ramakrishnan<br>Awadhesh Pandit; Bhagyashree Madhav Shelar; Darshan Sreenivas; Dimple Notani; Kathirvel Kandasamy; Lakshminarayanan CP; Satyajit Mayor; Uma Ramakrishnan                                                                                                                                                                                                                                                                                                                                                                                                                                                                                                                                                                                                                                                                                                                                                                                                                                                                                                                                                                                                                                                                                                                                                                                                                                                                                                    |
| EPI_ISL_9510057, EPI_ISL_9510060, EPI_ISL_9510061, EPI_ISL_9510062, EPI_ISL_9510063, EPI_ISL_9510066, EPI_ISL_9510069, EPI_ISL_9510070, EPI_ISL_9510071, EPI_ISL_9510077, EPI_ISL_9510078, EPI_ISL_9510080, EPI_ISL_9510081, EPI_ISL_9510084, EPI_ISL_9510086, EPI_ISL_9510088, EPI_ISL_9510093, EPI_ISL_9510095, EPI_ISL_9510099, EPI_ISL_9510100, EPI_ISL_9510105, EPI_ISL_9510110, EPI_ISL_9510112<br>see above                                                                                                       | BBMP- East<br>BBMP- South                                                                                                                 | inStem, NCBS-INSACOG<br>inStem, NCBS-INSACOG                                                                                                                                                 | Aswin SaiNarain; Dasaradhi Palakodeti; Uma Ramakrishnan<br>Aswin SaiNarain; Dasaradhi Palakodeti; Uma Ramakrishnan                                                                                                                                                                                                                                                                                                                                                                                                                                                                                                                                                                                                                                                                                                                                                                                                                                                                                                                                                                                                                                                                                                                                                                                                                                                                                                                                                                                                                                                                                                                                                                                                                                                                                                                                                                                                                                                                               |
| EPI_ISL_9408973, EPI_ISL_9408981, EPI_ISL_9408982, EPI_ISL_9408983, EPI_ISL_9408985, EPI_ISL_9408987, EPI_ISL_9408988, EPI_ISL_9408993, EPI_ISL_9408995, EPI_ISL_9408997, EPI_ISL_9409003, EPI_ISL_9409008, EPI_ISL_9409015, EPI_ISL_9409049, EPI_ISL_9510026, EPI_ISL_9510027, EPI_ISL_9510029, EPI_ISL_9510037<br>see above                                                                                                                                                                                            | BBMP- West<br>BBMP- Yelahanka                                                                                                             | inStem, NCBS-INSACOG<br>inStem, NCBS-INSACOG                                                                                                                                                 | Aswin SaiNarain; Dasaradhi Palakodeti; Uma Ramakrishnan<br>Aswin SaiNarain; Dasaradhi Palakodeti; Uma Ramakrishnan                                                                                                                                                                                                                                                                                                                                                                                                                                                                                                                                                                                                                                                                                                                                                                                                                                                                                                                                                                                                                                                                                                                                                                                                                                                                                                                                                                                                                                                                                                                                                                                                                                                                                                                                                                                                                                                                               |
| EPI_ISL_9510043, EPI_ISL_9510048, EPI_ISL_9510049, EPI_ISL_9510052, EPI_ISL_9510117, EPI_ISL_9510120, EPI_ISL_9510122, EPI_ISL_9510128, EPI_ISL_9510129<br>see above                                                                                                                                                                                                                                                                                                                                                     | BBMP-Bommanahalli<br>BBMP-Dasarahalli                                                                                                     | inStem, NCBS-INSACOG<br>inStem, NCBS-INSACOG                                                                                                                                                 | Aswin SaiNarain; Dasaradhi Palakodeti; Uma Ramakrishnan<br>Aswin SaiNarain; Dasaradhi Palakodeti; Uma Ramakrishnan                                                                                                                                                                                                                                                                                                                                                                                                                                                                                                                                                                                                                                                                                                                                                                                                                                                                                                                                                                                                                                                                                                                                                                                                                                                                                                                                                                                                                                                                                                                                                                                                                                                                                                                                                                                                                                                                               |
| EPI_ISL_8885402<br>EPI_ISL_9697449, EPI_ISL_9697451, EPI_ISL_9697453, EPI_ISL_9697454, EPI_ISL_9697736, EPI_ISL_9697737, EPI_ISL_9697749, EPI_ISL_9697751, EPI_ISL_9697753<br>see above                                                                                                                                                                                                                                                                                                                                  | BJ Medical College, Ahmedabad<br>BJMC                                                                                                     | Gujarat Biotechnology Research Centre<br>RF-IISER Pune                                                                                                                                       | Akhilesh Modi; Apurvashin Puvar; Bhadreshsinh Gohil; Chaitanya Joshi; Disha Vora; Janvi Raval; Jaykumar Rangani; Madhvi Joshi; Nimesh Patel; Nitin Savaliya; Nitin Shukla; Priyank Chavda; Ramesh Pandit; Roshani Mishra; Sonal Sharma; Sumita Soni; Tasnim Trivedi; Zarna Patel<br>Aurnab Ghose; Joy Merwin Monteiro; Krishanpal Karmodiya; Rajesh Karyakarte; Suvarna Joshi                                                                                                                                                                                                                                                                                                                                                                                                                                                                                                                                                                                                                                                                                                                                                                                                                                                                                                                                                                                                                                                                                                                                                                                                                                                                                                                                                                                                                                                                                                                                                                                                                    |
| EPI_ISL_8830556, EPI_ISL_8830559, EPI_ISL_8830585, EPI_ISL_8830626, EPI_ISL_8830641, EPI_ISL_8830649, EPI_ISL_8830654, EPI_ISL_9678118                                                                                                                                                                                                                                                                                                                                                                                   |                                                                                                                                           |                                                                                                                                                                                              |                                                                                                                                                                                                                                                                                                                                                                                                                                                                                                                                                                                                                                                                                                                                                                                                                                                                                                                                                                                                                                                                                                                                                                                                                                                                                                                                                                                                                                                                                                                                                                                                                                                                                                                                                                                                                                                                                                                                                                                                  |

|                                                                                                                                                                                                                                                                                                                                                                                                                                                                                                                                                                                                                   |                                                                    |                                                                                                                                              |                                                                                                                                                                                                                                                                                                                                                                                                                                                                                                                                                                                                                                                                                                                                                                                                                                                                                                                                                                                                |
|-------------------------------------------------------------------------------------------------------------------------------------------------------------------------------------------------------------------------------------------------------------------------------------------------------------------------------------------------------------------------------------------------------------------------------------------------------------------------------------------------------------------------------------------------------------------------------------------------------------------|--------------------------------------------------------------------|----------------------------------------------------------------------------------------------------------------------------------------------|------------------------------------------------------------------------------------------------------------------------------------------------------------------------------------------------------------------------------------------------------------------------------------------------------------------------------------------------------------------------------------------------------------------------------------------------------------------------------------------------------------------------------------------------------------------------------------------------------------------------------------------------------------------------------------------------------------------------------------------------------------------------------------------------------------------------------------------------------------------------------------------------------------------------------------------------------------------------------------------------|
| see above                                                                                                                                                                                                                                                                                                                                                                                                                                                                                                                                                                                                         | BJMC, Pune                                                         | RF-IISER Pune                                                                                                                                | Aurnab Ghose; Joy Merwin Monteiro; Krishanpal Karmodiya; Rajesh Karyakarte; Suvarna Joshi                                                                                                                                                                                                                                                                                                                                                                                                                                                                                                                                                                                                                                                                                                                                                                                                                                                                                                      |
| EPI_ISL_9428287                                                                                                                                                                                                                                                                                                                                                                                                                                                                                                                                                                                                   | BPR Analyses spécialisées                                          | Department of Virology, Henri Mondor University Hospital, Assistance Publique Hôpitaux de Paris, Université Paris-Est Créteil, INSERM U955   | Alexandre Soulier; Christophe Rodriguez; Elisabeth Trwinski; Guillaume Gricourt; Jean-Michel Pawlotsky; Melissa N'Debi; Slim Fourati; Vanessa Demontant                                                                                                                                                                                                                                                                                                                                                                                                                                                                                                                                                                                                                                                                                                                                                                                                                                        |
| EPI_ISL_8798912                                                                                                                                                                                                                                                                                                                                                                                                                                                                                                                                                                                                   | Babina Diagnostics                                                 | INSACOG-IBSD Manipur                                                                                                                         | Arvinda Thoudam; Dr. Nanaocha Sharma; Dr. Sunil S Thorat; Khurajam Dolly Devi; Teresa Tangpua                                                                                                                                                                                                                                                                                                                                                                                                                                                                                                                                                                                                                                                                                                                                                                                                                                                                                                  |
| EPI_ISL_9320683, EPI_ISL_9322838, EPI_ISL_9322839, EPI_ISL_9322841, EPI_ISL_9322842, EPI_ISL_9322843, EPI_ISL_9322844                                                                                                                                                                                                                                                                                                                                                                                                                                                                                             |                                                                    |                                                                                                                                              |                                                                                                                                                                                                                                                                                                                                                                                                                                                                                                                                                                                                                                                                                                                                                                                                                                                                                                                                                                                                |
| see above                                                                                                                                                                                                                                                                                                                                                                                                                                                                                                                                                                                                         | Baguio General Hospital And Medical Center                         | Philippine Genome Center                                                                                                                     | Alethea R. de Guzman; Alyssa Joyce E. Telles; Angelica A. Garcia; Anna Ong-Lim; Benedict A. Maralit; Carlo M. Lapid; Celia Carlos; Cynthia P. Saloma; Devon Ray Pacial; Diomedes A. Cariño; Edsel Maurice Salvana; El King D. Morado; Elcid Aaron R. Pangilinan; Eva Maria Cutiongo-de la Paz; Francis A. Tablizo; Henrietta Marie Rodriguez; Jaime C. Montoya; Jan Michael C. Yap; Jarvin E. Nipales; Jo-Hannah S. Llamas; John Michael Egana; John Q. Wong; Johnny A. Ong; Joshua Gregor A. Dizon; Joshua Jose Endozo; Karol Sophia Agape R. Padilla; Kris P. Punayan; Kristina Patriz Dela Cruz; Lindsay Clare D.L. Carandang; Ma. Exanil Plantig; Marc Edsel C. Ayes; Maria Rosario Singh-Vergeire; Maria Sofia L. Yangzon; Marielle M. Gamboa; Marissa Alejandria; Niña Francesca Bustamante; Razel Nikka M. Hao; Renato Jacinto Q. Mantaring; Rianna Patricia S. Cruz; Rizel A. Medina; Shiela Mae M. Araiza; Yvonne Valerie Austria; Zipporah Mariebelle R. Enriquez; Zyrel V. Mollejon |
| EPI_ISL_9409070, EPI_ISL_9409071, EPI_ISL_9409079, EPI_ISL_9409080, EPI_ISL_9409081, EPI_ISL_9409082, EPI_ISL_9409091, EPI_ISL_9409094, EPI_ISL_9409096, EPI_ISL_9409101, EPI_ISL_9409103, EPI_ISL_9409104, EPI_ISL_9409105                                                                                                                                                                                                                                                                                                                                                                                       |                                                                    |                                                                                                                                              |                                                                                                                                                                                                                                                                                                                                                                                                                                                                                                                                                                                                                                                                                                                                                                                                                                                                                                                                                                                                |
| see above                                                                                                                                                                                                                                                                                                                                                                                                                                                                                                                                                                                                         | Bangalore Airport                                                  | inStem, NCBS-INSACOG                                                                                                                         | Aswin SaiNarain; Dasaradhi Palakodeti; Uma Ramakrishnan                                                                                                                                                                                                                                                                                                                                                                                                                                                                                                                                                                                                                                                                                                                                                                                                                                                                                                                                        |
| EPI_ISL_9322764, EPI_ISL_9322765, EPI_ISL_9322766, EPI_ISL_9322767, EPI_ISL_9322768, EPI_ISL_9322769                                                                                                                                                                                                                                                                                                                                                                                                                                                                                                              | Bataan General Hospital & Medical Center                           | Philippine Genome Center                                                                                                                     | Alethea R. de Guzman; Alyssa Joyce E. Telles; Angelica A. Garcia; Anna Ong-Lim; Benedict A. Maralit; Carlo M. Lapid; Celia Carlos; Cynthia P. Saloma; Devon Ray Pacial; Diomedes A. Cariño; Edsel Maurice Salvana; El King D. Morado; Elcid Aaron R. Pangilinan; Eva Maria Cutiongo-de la Paz; Francis A. Tablizo; Henrietta Marie Rodriguez; Jaime C. Montoya; Jan Michael C. Yap; Jarvin E. Nipales; Jo-Hannah S. Llamas; John Michael Egana; John Q. Wong; Johnny A. Ong; Joshua Gregor A. Dizon; Joshua Jose Endozo; Karol Sophia Agape R. Padilla; Kris P. Punayan; Kristina Patriz Dela Cruz; Lindsay Clare D.L. Carandang; Ma. Exanil Plantig; Marc Edsel C. Ayes; Maria Rosario Singh-Vergeire; Maria Sofia L. Yangzon; Marielle M. Gamboa; Marissa Alejandria; Niña Francesca Bustamante; Razel Nikka M. Hao; Renato Jacinto Q. Mantaring; Rianna Patricia S. Cruz; Rizel A. Medina; Shiela Mae M. Araiza; Yvonne Valerie Austria; Zipporah Mariebelle R. Enriquez; Zyrel V. Mollejon |
| EPI_ISL_9323491                                                                                                                                                                                                                                                                                                                                                                                                                                                                                                                                                                                                   | Batangas Medical Center (BATMC)                                    | Philippine Genome Center                                                                                                                     | Alethea R. de Guzman; Alyssa Joyce E. Telles; Angelica A. Garcia; Anna Ong-Lim; Benedict A. Maralit; Carlo M. Lapid; Celia Carlos; Cynthia P. Saloma; Devon Ray Pacial; Diomedes A. Cariño; Edsel Maurice Salvana; El King D. Morado; Elcid Aaron R. Pangilinan; Eva Maria Cutiongo-de la Paz; Francis A. Tablizo; Henrietta Marie Rodriguez; Jaime C. Montoya; Jan Michael C. Yap; Jarvin E. Nipales; Jo-Hannah S. Llamas; John Michael Egana; John Q. Wong; Johnny A. Ong; Joshua Gregor A. Dizon; Joshua Jose Endozo; Karol Sophia Agape R. Padilla; Kris P. Punayan; Kristina Patriz Dela Cruz; Lindsay Clare D.L. Carandang; Ma. Exanil Plantig; Marc Edsel C. Ayes; Maria Rosario Singh-Vergeire; Maria Sofia L. Yangzon; Marielle M. Gamboa; Marissa Alejandria; Niña Francesca Bustamante; Razel Nikka M. Hao; Renato Jacinto Q. Mantaring; Rianna Patricia S. Cruz; Rizel A. Medina; Shiela Mae M. Araiza; Yvonne Valerie Austria; Zipporah Mariebelle R. Enriquez; Zyrel V. Mollejon |
| EPI_ISL_9177583, EPI_ISL_9177584                                                                                                                                                                                                                                                                                                                                                                                                                                                                                                                                                                                  | Bauan Rural Health Unit II                                         | Research Institute for Tropical Medicine                                                                                                     | Alexander Sadiasa; Anne Pauline A. Alpino; Ardiane Ysabelle M. Dolor; Catalino S. Demetria; Criselda T. Bautista; Francisco Gerardo M. Polotan; Jefferson Earl J. Halog; Joseph Hughes; Kirstyn Brunker; Lei Lanna M. Dancel; Ma. Angelica A. Tujan; Mayan Uy-Lumandas; Othoniel Jan T. Onza; Simon Daldry; Timothy John R. Dizon; Vina Lea F. Arguelles; Yao-Tsun Li                                                                                                                                                                                                                                                                                                                                                                                                                                                                                                                                                                                                                          |
| EPI_ISL_9322849                                                                                                                                                                                                                                                                                                                                                                                                                                                                                                                                                                                                   | Benguet General Hospital                                           | Philippine Genome Center                                                                                                                     | Alethea R. de Guzman; Alyssa Joyce E. Telles; Angelica A. Garcia; Anna Ong-Lim; Benedict A. Maralit; Carlo M. Lapid; Celia Carlos; Cynthia P. Saloma; Devon Ray Pacial; Diomedes A. Cariño; Edsel Maurice Salvana; El King D. Morado; Elcid Aaron R. Pangilinan; Eva Maria Cutiongo-de la Paz; Francis A. Tablizo; Henrietta Marie Rodriguez; Jaime C. Montoya; Jan Michael C. Yap; Jarvin E. Nipales; Jo-Hannah S. Llamas; John Michael Egana; John Q. Wong; Johnny A. Ong; Joshua Gregor A. Dizon; Joshua Jose Endozo; Karol Sophia Agape R. Padilla; Kris P. Punayan; Kristina Patriz Dela Cruz; Lindsay Clare D.L. Carandang; Ma. Exanil Plantig; Marc Edsel C. Ayes; Maria Rosario Singh-Vergeire; Maria Sofia L. Yangzon; Marielle M. Gamboa; Marissa Alejandria; Niña Francesca Bustamante; Razel Nikka M. Hao; Renato Jacinto Q. Mantaring; Rianna Patricia S. Cruz; Rizel A. Medina; Shiela Mae M. Araiza; Yvonne Valerie Austria; Zipporah Mariebelle R. Enriquez; Zyrel V. Mollejon |
| EPI_ISL_8621695                                                                                                                                                                                                                                                                                                                                                                                                                                                                                                                                                                                                   | Berkshire and Surrey Pathology Services Lighthouse Laboratory      | Wellcome Sanger Institute for the COVID-19 Genomics UK (COG-UK) Consortium                                                                   | Berkshire and Surrey Pathology Services Lighthouse Laboratory and Alex Alderton; Cordelia Langford; David K. Jackson; Dominic Kwiatkowski; Ewan Harrison; Ian Johnston; Jeffrey Barrett; John Sillitoe on behalf of the Wellcome Sanger Institute COVID-19 Surveillance Team; Roberto Amato; Sonia Goncalves                                                                                                                                                                                                                                                                                                                                                                                                                                                                                                                                                                                                                                                                                   |
| EPI_ISL_8312616                                                                                                                                                                                                                                                                                                                                                                                                                                                                                                                                                                                                   | BionexT Lab                                                        | Laboratoire national de sante, Microbiology, Microbial Genomics Platform                                                                     | Anke Wiencke-Baldacchino; Catherine Ragimbeau; Elodie Solarino; Fatu Djabi; Jessica Tapp; Lise Pignon; Raoul Salmon; Sibel Berger; Tamir Abdelrahman; Thibault Ferrandon; Virginie Jover                                                                                                                                                                                                                                                                                                                                                                                                                                                                                                                                                                                                                                                                                                                                                                                                       |
| EPI_ISL_8608061, EPI_ISL_8608066, EPI_ISL_8637953, EPI_ISL_8637960, EPI_ISL_8637965, EPI_ISL_8826560                                                                                                                                                                                                                                                                                                                                                                                                                                                                                                              | Botswana Harvard HIV Reference Laboratory                          | Botswana Harvard HIV Reference Laboratory                                                                                                    | Boitumelo J. L Zuze; Boitumelo Zuze; Botshelo Radibe; Dorcas Maruapula; Joseph Makhema; Keoratlle Ntshambiwa; Kgomotso Moruisi; Legodile Kooepile; Letsibogo Gaoralwe; Mosepele Mosepele; Mphaphi B. Mbulawa; Ontlametse T. Bareng; Pamela Smith-Lawrence; Roger Shapiro; Sefetogi Ramaolaga; Shahin Lockman; Sikhulile Moyo; Simani Gaseitsiwe; Thela Tefelo; Thongbotho Mphoyakgosi; Wonderful T. Choga                                                                                                                                                                                                                                                                                                                                                                                                                                                                                                                                                                                      |
| EPI_ISL_8903728, EPI_ISL_8903773, EPI_ISL_8913403, EPI_ISL_8914749, EPI_ISL_8914930, EPI_ISL_8914965, EPI_ISL_8914993, EPI_ISL_8915107, EPI_ISL_9434118, EPI_ISL_9759813, EPI_ISL_9760127, EPI_ISL_9760129, EPI_ISL_9760152, EPI_ISL_9760171, EPI_ISL_9760782, EPI_ISL_9760820, EPI_ISL_9760843, EPI_ISL_9760874, EPI_ISL_9764732                                                                                                                                                                                                                                                                                 |                                                                    |                                                                                                                                              |                                                                                                                                                                                                                                                                                                                                                                                                                                                                                                                                                                                                                                                                                                                                                                                                                                                                                                                                                                                                |
| see above                                                                                                                                                                                                                                                                                                                                                                                                                                                                                                                                                                                                         | British Columbia Centre For Disease Control                        | BCCDC Public Health Laboratory                                                                                                               | Ana Pacagnella; Corrinne Ng; Dan Fornika; James Zlonski; John Tyson; Kim Macdonald; Kimia Kamelian; Linda Hoang; Loretta Janz; Mel Krajdren; Prystjeko Natalia; Robert Azana; Shannon Russell                                                                                                                                                                                                                                                                                                                                                                                                                                                                                                                                                                                                                                                                                                                                                                                                  |
| EPI_ISL_8211060, EPI_ISL_8212418, EPI_ISL_8512144                                                                                                                                                                                                                                                                                                                                                                                                                                                                                                                                                                 | Broad Institute Clinical Research Sequencing Platform              | Infectious Disease Program, Broad Institute of Harvard and MIT                                                                               | Adams, G.; B.L.; B.W.; Bauer, M.; Birren; Blumenstiel, B.; Brown, C.; Carter, A.; Chaluvali, S.; D.J.; DeFelice, M.; DeRuff, K.; Dodge, S.; Gabriel, S.; Gallagher, K.; Gladden-Young, A.; Granger, B.; J.E.; K.J.; Lagerborg, K.; Larkin, K.; Lee, M.; Lemieux; Lennon, N.; Loreth, C.; Madoff, L.; McGovern, S.; Meldrim, J.; Normandin, E.; P.C.; Park; Pearman, L.; Reilly, S.; Rudy, M.; Sabeti; Siddle; Smole, S.; Tomkins-Tinch, C.; Vicente, G.; and MacInnis                                                                                                                                                                                                                                                                                                                                                                                                                                                                                                                          |
| EPI_ISL_9320852, EPI_ISL_9320855                                                                                                                                                                                                                                                                                                                                                                                                                                                                                                                                                                                  | Bulacan Medical Center                                             | Philippine Genome Center                                                                                                                     | Alethea R. de Guzman; Alyssa Joyce E. Telles; Angelica A. Garcia; Anna Ong-Lim; Benedict A. Maralit; Carlo M. Lapid; Celia Carlos; Cynthia P. Saloma; Devon Ray Pacial; Diomedes A. Cariño; Edsel Maurice Salvana; El King D. Morado; Elcid Aaron R. Pangilinan; Eva Maria Cutiongo-de la Paz; Francis A. Tablizo; Henrietta Marie Rodriguez; Jaime C. Montoya; Jan Michael C. Yap; Jarvin E. Nipales; Jo-Hannah S. Llamas; John Michael Egana; John Q. Wong; Johnny A. Ong; Joshua Gregor A. Dizon; Joshua Jose Endozo; Karol Sophia Agape R. Padilla; Kris P. Punayan; Kristina Patriz Dela Cruz; Lindsay Clare D.L. Carandang; Ma. Exanil Plantig; Marc Edsel C. Ayes; Maria Rosario Singh-Vergeire; Maria Sofia L. Yangzon; Marielle M. Gamboa; Marissa Alejandria; Niña Francesca Bustamante; Razel Nikka M. Hao; Renato Jacinto Q. Mantaring; Rianna Patricia S. Cruz; Rizel A. Medina; Shiela Mae M. Araiza; Yvonne Valerie Austria; Zipporah Mariebelle R. Enriquez; Zyrel V. Mollejon |
| EPI_ISL_9177604                                                                                                                                                                                                                                                                                                                                                                                                                                                                                                                                                                                                   | CALACA RURAL HEALTH UNIT                                           | Research Institute for Tropical Medicine                                                                                                     | Alexander Sadiasa; Anne Pauline A. Alpino; Ardiane Ysabelle M. Dolor; Catalino S. Demetria; Criselda T. Bautista; Francisco Gerardo M. Polotan; Jefferson Earl J. Halog; Joseph Hughes; Kirstyn Brunker; Lei Lanna M. Dancel; Ma. Angelica A. Tujan; Mayan Uy-Lumandas; Othoniel Jan T. Onza; Simon Daldry; Timothy John R. Dizon; Vina Lea F. Arguelles; Yao-Tsun Li                                                                                                                                                                                                                                                                                                                                                                                                                                                                                                                                                                                                                          |
| EPI_ISL_8578357, EPI_ISL_9082872, EPI_ISL_9082893, EPI_ISL_9072346                                                                                                                                                                                                                                                                                                                                                                                                                                                                                                                                                | CAPRISA                                                            | CERI, Centre for Epidemic Response and Innovation, Stellenbosch University and KRISP, KZN Research Innovation and Sequencing Platform, UKZN. | Aida Sivro; Arisha Maharaj; Giandhari J; Moir M; Naidoo Y; Natasha Samsunder; Pillay S; Rampal U; Rampal Y; San JE; Tegally H; Tshiabula D; Wilkinson E; de Oliveira T; van Wyk S                                                                                                                                                                                                                                                                                                                                                                                                                                                                                                                                                                                                                                                                                                                                                                                                              |
| EPI_ISL_9072346                                                                                                                                                                                                                                                                                                                                                                                                                                                                                                                                                                                                   | CAPRISA Hillcrest                                                  | CERI, Centre for Epidemic Response and Innovation, Stellenbosch University and KRISP, KZN Research Innovation and Sequencing Platform, UKZN. | Aida Sivro; Giandhari J; Moir M; Naidoo Y; Natasha Samsunder; Pillay S; Rampal U; Rampal Y; San JE; Tegally H; Tshiabula D; Wilkinson E; de Oliveira T; van Wyk S                                                                                                                                                                                                                                                                                                                                                                                                                                                                                                                                                                                                                                                                                                                                                                                                                              |
| EPI_ISL_8769705, EPI_ISL_8769709                                                                                                                                                                                                                                                                                                                                                                                                                                                                                                                                                                                  | CARINGdx-Mahajan Imaging                                           | ILBS                                                                                                                                         | Arjun Bhugra; Chhagan Bihari Sharma; Ekta Gupta; Pramod Gautam; Rahul Garg; Reshu Agarwal; Shiv Kumar Sarin; Urviinder Kaur; Varun Suroliya                                                                                                                                                                                                                                                                                                                                                                                                                                                                                                                                                                                                                                                                                                                                                                                                                                                    |
| EPI_ISL_8769734                                                                                                                                                                                                                                                                                                                                                                                                                                                                                                                                                                                                   | CEE DEE DIAGNOSTICS                                                | ILBS                                                                                                                                         | Arjun Bhugra; Chhagan Bihari Sharma; Ekta Gupta; Pramod Gautam; Rahul Garg; Reshu Agarwal; Shiv Kumar Sarin; Urviinder Kaur; Varun Suroliya                                                                                                                                                                                                                                                                                                                                                                                                                                                                                                                                                                                                                                                                                                                                                                                                                                                    |
| EPI_ISL_8401203                                                                                                                                                                                                                                                                                                                                                                                                                                                                                                                                                                                                   | CHU UCL Namur, Avenue G. Thérasse 1, 5530 Vvoir, Belgium           | Plateforme de testing Namuroise                                                                                                              | Degosserie Jonathan; Demars Aurore; Denis Olivier; Laurent Hélène; Maschietto Céline; Mullier François; Nobis Chloé; Otto Gaetan                                                                                                                                                                                                                                                                                                                                                                                                                                                                                                                                                                                                                                                                                                                                                                                                                                                               |
| EPI_ISL_8166502, EPI_ISL_8166614, EPI_ISL_9375619                                                                                                                                                                                                                                                                                                                                                                                                                                                                                                                                                                 | CITY X RAY AND SCAN CLINIC PVT LTD                                 | ILBS                                                                                                                                         | Amit Pandey; Arjun Bhugra; Chhagan Bihari Sharma; Ekta Gupta; Pramod Gautam; Priya Singh; Rahul Garg; Reshu Agarwal; Shiv Kumar Sarin; Urviinder Kaur; Varun Suroliya                                                                                                                                                                                                                                                                                                                                                                                                                                                                                                                                                                                                                                                                                                                                                                                                                          |
| EPI_ISL_8565022                                                                                                                                                                                                                                                                                                                                                                                                                                                                                                                                                                                                   | CITY X RAY AND SCAN CLINIC PVT LTD.                                | ILBS                                                                                                                                         | Arjun Bhugra; Chhagan Bihari Sharma; Ekta Gupta; Pramod Gautam; Rahul Garg; Reshu Agarwal; Shiv Kumar Sarin; Urviinder Kaur; Varun Suroliya                                                                                                                                                                                                                                                                                                                                                                                                                                                                                                                                                                                                                                                                                                                                                                                                                                                    |
| EPI_ISL_9549905, EPI_ISL_9549906, EPI_ISL_9549907, EPI_ISL_9549908, EPI_ISL_9549909, EPI_ISL_9549910, EPI_ISL_9549911, EPI_ISL_9549912, EPI_ISL_9549913, EPI_ISL_9549914, EPI_ISL_9549916, EPI_ISL_9549917, EPI_ISL_9549919, EPI_ISL_9549920, EPI_ISL_9549921, EPI_ISL_9549922, EPI_ISL_9549923, EPI_ISL_9549924, EPI_ISL_9549926, EPI_ISL_9549927, EPI_ISL_9549928, EPI_ISL_9549929, EPI_ISL_9549930, EPI_ISL_9549931, EPI_ISL_9549932, EPI_ISL_9549933, EPI_ISL_9549934, EPI_ISL_9549935, EPI_ISL_9549936, EPI_ISL_9549937, EPI_ISL_9549939, EPI_ISL_9549941, EPI_ISL_9549942, EPI_ISL_9549943, EPI_ISL_9549944 |                                                                    |                                                                                                                                              |                                                                                                                                                                                                                                                                                                                                                                                                                                                                                                                                                                                                                                                                                                                                                                                                                                                                                                                                                                                                |
| see above                                                                                                                                                                                                                                                                                                                                                                                                                                                                                                                                                                                                         | COVID-CBNAAT; Department of Microbiology; AIIMS New Delhi          | Genomics Lab; CCRF; AIIMS; New Delhi INSACOG                                                                                                 | Anwita Mishra; Deepika Bhardwaj; J. Stephenraj; Jawed Ahmed; Jyoti Shukla; Kiran Bala; Lata Kumari; Lata Rani; Madhulika Kabra; Md. Nizam; Rama Chaudhry; Randeep Guleria; Ritu Gupta; Subrata Sinha; Sudesh Gaurav; Sushanta Deb; Urvashi B. Singh; vineet ahuja                                                                                                                                                                                                                                                                                                                                                                                                                                                                                                                                                                                                                                                                                                                              |
| EPI_ISL_9320867, EPI_ISL_9320869, EPI_ISL_9322759, EPI_ISL_9322805, EPI_ISL_9322806, EPI_ISL_9322807, EPI_ISL_9322812, EPI_ISL_9322814, EPI_ISL_9322817, EPI_ISL_9322818, EPI_ISL_9322819                                                                                                                                                                                                                                                                                                                                                                                                                         |                                                                    |                                                                                                                                              |                                                                                                                                                                                                                                                                                                                                                                                                                                                                                                                                                                                                                                                                                                                                                                                                                                                                                                                                                                                                |
| see above                                                                                                                                                                                                                                                                                                                                                                                                                                                                                                                                                                                                         | Cagayan Valley Medical Center Molecular Laboratory                 | Philippine Genome Center                                                                                                                     | Alethea R. de Guzman; Alyssa Joyce E. Telles; Angelica A. Garcia; Anna Ong-Lim; Benedict A. Maralit; Carlo M. Lapid; Celia Carlos; Cynthia P. Saloma; Devon Ray Pacial; Diomedes A. Cariño; Edsel Maurice Salvana; El King D. Morado; Elcid Aaron R. Pangilinan; Eva Maria Cutiongo-de la Paz; Francis A. Tablizo; Henrietta Marie Rodriguez; Jaime C. Montoya; Jan Michael C. Yap; Jarvin E. Nipales; Jo-Hannah S. Llamas; John Michael Egana; John Q. Wong; Johnny A. Ong; Joshua Gregor A. Dizon; Joshua Jose Endozo; Karol Sophia Agape R. Padilla; Kris P. Punayan; Kristina Patriz Dela Cruz; Lindsay Clare D.L. Carandang; Ma. Exanil Plantig; Marc Edsel C. Ayes; Maria Rosario Singh-Vergeire; Maria Sofia L. Yangzon; Marielle M. Gamboa; Marissa Alejandria; Niña Francesca Bustamante; Razel Nikka M. Hao; Renato Jacinto Q. Mantaring; Rianna Patricia S. Cruz; Rizel A. Medina; Shiela Mae M. Araiza; Yvonne Valerie Austria; Zipporah Mariebelle R. Enriquez; Zyrel V. Mollejon |
| EPI_ISL_8975088                                                                                                                                                                                                                                                                                                                                                                                                                                                                                                                                                                                                   | Calitzdorp (Bergsig) Clinic wdc CDC                                | NHLS/UCT                                                                                                                                     | Arash Iranzadeh; Bruna Galva; Carolyn Williams; Deelan Doolabh; Diana Hardie; Gert Marais; Innocent Mudau; Luicer Olubayo; Lynn Tyers; Marvin Hsiao; Nokuzola Mbehle; Rageema Joseph; Stephen Korsman                                                                                                                                                                                                                                                                                                                                                                                                                                                                                                                                                                                                                                                                                                                                                                                          |
| EPI_ISL_8546780                                                                                                                                                                                                                                                                                                                                                                                                                                                                                                                                                                                                   | Cedibio Unilabs site Oustalou                                      | Laboratoire Cerba                                                                                                                            | Bénédicte Roquebert; Laura Verdume; Mathilde Roussel; Sabine Trombert-Paolantoni; Stéphanie Haïm-Boukobza                                                                                                                                                                                                                                                                                                                                                                                                                                                                                                                                                                                                                                                                                                                                                                                                                                                                                      |
| EPI_ISL_8473154                                                                                                                                                                                                                                                                                                                                                                                                                                                                                                                                                                                                   | Center for Laboratory Medicine                                     | Center for Laboratory Medicine, ZLMSG                                                                                                        | Yannick Gerth                                                                                                                                                                                                                                                                                                                                                                                                                                                                                                                                                                                                                                                                                                                                                                                                                                                                                                                                                                                  |
| EPI_ISL_9593100                                                                                                                                                                                                                                                                                                                                                                                                                                                                                                                                                                                                   | Charoenkrung pracharak hospital                                    | Division of Genomic Medicine and Innovation support, Department of Medical Sciences, Ministry of Public Health, Thailand                     | Archawan Rojanawiwat; Jirapha Pakdee; Natthakul Bunneang; Nuanjun Wichukhinda; Penpitcha Thawong; Plailuk Akkapaiboon Okada; Puntharika Piboonsiri; Surakameth Mahasirimongkol; Waritta Sawaengdee                                                                                                                                                                                                                                                                                                                                                                                                                                                                                                                                                                                                                                                                                                                                                                                             |
| EPI_ISL_9223492                                                                                                                                                                                                                                                                                                                                                                                                                                                                                                                                                                                                   | Chiba Prefectural Institute of Public Health                       | Division of Virology and Zoology, Chiba Prefectural Institute of Public Health                                                               | Akihiro Takemura; Kentaro Itokawa; Makoto Kuroda; Mari Ohta; Masanori Hashino; Mika Takeuchi; Rina Tanaka; Shigenori Sato; Tsuyoshi Sekizuka; Yuji Hanada; Yuki Fujinuma                                                                                                                                                                                                                                                                                                                                                                                                                                                                                                                                                                                                                                                                                                                                                                                                                       |
| EPI_ISL_8477330, EPI_ISL_8519459                                                                                                                                                                                                                                                                                                                                                                                                                                                                                                                                                                                  | Clinical Microbiology Laboratory, Tel Aviv Sourasky Medical Center | Clinical Microbiology Laboratory, Tel Aviv Sourasky Medical Center                                                                           | Alon Ziv; Amos Adler; Goel Morad; Katya Levvitsky; Lior Handler; Ora Halutz                                                                                                                                                                                                                                                                                                                                                                                                                                                                                                                                                                                                                                                                                                                                                                                                                                                                                                                    |
| EPI_ISL_8097776, EPI_ISL_8097794, EPI_ISL_8286437, EPI_ISL_8286457, EPI_ISL_8286515, EPI_ISL_8286517, EPI_ISL_8538665, EPI_ISL_8538676, EPI_ISL_8538803, EPI_ISL_8538804, EPI_ISL_8538844, EPI_ISL_8538866, EPI_ISL_8538870, EPI_ISL_8538891, EPI_ISL_8538897, EPI_ISL_8538903, EPI_ISL_8538909, EPI_ISL_8538910, EPI_ISL_8538916, EPI_ISL_8538952, EPI_ISL_8538954, EPI_ISL_8538955                                                                                                                                                                                                                              |                                                                    |                                                                                                                                              |                                                                                                                                                                                                                                                                                                                                                                                                                                                                                                                                                                                                                                                                                                                                                                                                                                                                                                                                                                                                |
| see above                                                                                                                                                                                                                                                                                                                                                                                                                                                                                                                                                                                                         | Clinical Microbiology, Infection Prevention and Control            | Section for Molecular Diagnostics                                                                                                            | Björn Hallström; Jonas Björkman                                                                                                                                                                                                                                                                                                                                                                                                                                                                                                                                                                                                                                                                                                                                                                                                                                                                                                                                                                |
| EPI_ISL_9169187                                                                                                                                                                                                                                                                                                                                                                                                                                                                                                                                                                                                   | Color                                                              | California Department of Public Health                                                                                                       | VRDL COVID Sequencing Hub                                                                                                                                                                                                                                                                                                                                                                                                                                                                                                                                                                                                                                                                                                                                                                                                                                                                                                                                                                      |
| EPI_ISL_8643930                                                                                                                                                                                                                                                                                                                                                                                                                                                                                                                                                                                                   | Colorado Department of Public Health and Environment               | Colorado Department of Public Health and Environment                                                                                         | Alexandria Rossheim; Arianna Smith; Diana Ir; Emily A. Travanty; Laura Bankers; Mandy Waters; Michael Martin; Molly C. Hetherington-Rauth; Shannon R. Matzinger                                                                                                                                                                                                                                                                                                                                                                                                                                                                                                                                                                                                                                                                                                                                                                                                                                |



| Agency                                                                                                                                                                                                                                                                                                                                                                                                                                                                                                                                                                                                                                                                                                 |                                                                                                                       |                                                                                                                       |                                                                                                                                                                                                                                                                                                                                                                                                                                                                                                                                                                                                                                                                                                                                                                                                                                                                                                                                                                                              |
|--------------------------------------------------------------------------------------------------------------------------------------------------------------------------------------------------------------------------------------------------------------------------------------------------------------------------------------------------------------------------------------------------------------------------------------------------------------------------------------------------------------------------------------------------------------------------------------------------------------------------------------------------------------------------------------------------------|-----------------------------------------------------------------------------------------------------------------------|-----------------------------------------------------------------------------------------------------------------------|----------------------------------------------------------------------------------------------------------------------------------------------------------------------------------------------------------------------------------------------------------------------------------------------------------------------------------------------------------------------------------------------------------------------------------------------------------------------------------------------------------------------------------------------------------------------------------------------------------------------------------------------------------------------------------------------------------------------------------------------------------------------------------------------------------------------------------------------------------------------------------------------------------------------------------------------------------------------------------------------|
| EPI_ISL_8152792, EPI_ISL_8409361, EPI_ISL_8649307, EPI_ISL_8708944                                                                                                                                                                                                                                                                                                                                                                                                                                                                                                                                                                                                                                     | Division of Medical Virology, National Health Laboratory Service (NHLS), Tygerberg Hospital / Stellenbosch University | Division of Medical Virology, National Health Laboratory Service (NHLS), Tygerberg Hospital / Stellenbosch University | Emilia Wilson; Gert van Zyl; Mathilda Claassen; Shannon Wilson; Susan Engelbrecht; Tania Stander; Tongai Maponga; Wolfgang Preiser                                                                                                                                                                                                                                                                                                                                                                                                                                                                                                                                                                                                                                                                                                                                                                                                                                                           |
| EPI_ISL_9697782, EPI_ISL_9697804                                                                                                                                                                                                                                                                                                                                                                                                                                                                                                                                                                                                                                                                       | Dr Jariwala Laboratory & Diagnostics LLP, Mumbai                                                                      | RF-IISER Pune                                                                                                         | Aurnab Ghose; Joy Merwin Monteiro; Krishanpal Karmodiya                                                                                                                                                                                                                                                                                                                                                                                                                                                                                                                                                                                                                                                                                                                                                                                                                                                                                                                                      |
| EPI_ISL_9430199                                                                                                                                                                                                                                                                                                                                                                                                                                                                                                                                                                                                                                                                                        | Dr Lal Path Labs Ltd                                                                                                  | Molecular Genetics Laboratory, THSTI, Faridabad                                                                       | DR. JYOTI VERMA; DR.BHABATOSH DAS; MS.SONALI POREY KARMAKAR                                                                                                                                                                                                                                                                                                                                                                                                                                                                                                                                                                                                                                                                                                                                                                                                                                                                                                                                  |
| EPI_ISL_8769745, EPI_ISL_8769750, EPI_ISL_8769753                                                                                                                                                                                                                                                                                                                                                                                                                                                                                                                                                                                                                                                      | Dr P Bhasin Path Labs                                                                                                 | ILBS                                                                                                                  | Arjun Bhugra; Chhagan Bihari Sharma; Ekta Gupta; Pramod Gautam; Rahul Garg; Reshu Agarwal; Shiv Kumar Sarin; Urvinder Kaur; Varun Suroliya                                                                                                                                                                                                                                                                                                                                                                                                                                                                                                                                                                                                                                                                                                                                                                                                                                                   |
| EPI_ISL_8885419                                                                                                                                                                                                                                                                                                                                                                                                                                                                                                                                                                                                                                                                                        | Dr. Bhatt laboratory, Rajkot                                                                                          | Gujarat Biotechnology Research Centre                                                                                 | Akhilesh Modi; Apurvasinh Puvar; Bhadeshsinh Gohil; Chaitanya Joshi; Disha Vora; Janvi Raval; Jay Parikh; Jaykumar Rangani; Madhvi Joshi; Nimesh Patel; Nitin Savaliya; Nitin Shukla; Priyank Chavda; Ramesh Pandit; Roshani Mishra; Sonal Sharma; Tasnim Trivedi; Zarna Patel                                                                                                                                                                                                                                                                                                                                                                                                                                                                                                                                                                                                                                                                                                               |
| EPI_ISL_9320877                                                                                                                                                                                                                                                                                                                                                                                                                                                                                                                                                                                                                                                                                        | Dr. Jose N. Rodriguez Memorial Hospital And Sanitarium (Tala)                                                         | Philippine Genome Center                                                                                              | Alethea R. de Guzman; Alyssa Joyce E. Telles; Angelica A. Garcia; Anna Ong-Lim; Benedict A. Maralit; Carlo M. Lapid; Celia Carlos; Cynthia P. Saloma; Devon Ray Pacial; Diomedes A. Cariño; Edsel Maurice Salvana; El King D. Morado; Elcid Aaron R. Pangilinan; Eva Maria Cutiongo-de la Paz; Francis A. Tablizo; Henrietta Marie Rodriguez; Jaime C. Montoya; Jan Michael C. Yap; Jarvin E. Nipales; Jo-Hannah S. Lames; John Michael Egana; John Q. Wong; Johnny A. Ong; Joshua Gregor A. Dizon; Joshua Jose Endozo; Karol Sophia Agape R. Padilla; Kris P. Punayan; Kristina Patriz Dela Cruz; Lindsay Clare D.L. Carandang; Ma. Exanil Plantig; Marc Edsel C. Ayes; Maria Rosario Singh-Vergeire; Maria Sofia L. Yangzon; Marielle M. Gamboa; Marissa Alejandria; Niña Francesca Bustamante; Razel Nikka M. Hao; Renato Jacinto Q. Mantaring; Rianna Patricia S. Cruz; Rizel A. Medina; Shiela Mae M. Araiza; Yvonne Valerie Austria; Zipporah Mariebelle R. Enriquez; Zryel V. Mollejo |
| EPI_ISL_9323176, EPI_ISL_9323177                                                                                                                                                                                                                                                                                                                                                                                                                                                                                                                                                                                                                                                                       | Dr. Rafael S. Tumbokon Memorial Hospital                                                                              | Philippine Genome Center                                                                                              | Alethea R. de Guzman; Alyssa Joyce E. Telles; Angelica A. Garcia; Anna Ong-Lim; Benedict A. Maralit; Carlo M. Lapid; Celia Carlos; Cynthia P. Saloma; Devon Ray Pacial; Diomedes A. Cariño; Edsel Maurice Salvana; El King D. Morado; Elcid Aaron R. Pangilinan; Eva Maria Cutiongo-de la Paz; Francis A. Tablizo; Henrietta Marie Rodriguez; Jaime C. Montoya; Jan Michael C. Yap; Jarvin E. Nipales; Jo-Hannah S. Lames; John Michael Egana; John Q. Wong; Johnny A. Ong; Joshua Gregor A. Dizon; Joshua Jose Endozo; Karol Sophia Agape R. Padilla; Kris P. Punayan; Kristina Patriz Dela Cruz; Lindsay Clare D.L. Carandang; Ma. Exanil Plantig; Marc Edsel C. Ayes; Maria Rosario Singh-Vergeire; Maria Sofia L. Yangzon; Marielle M. Gamboa; Marissa Alejandria; Niña Francesca Bustamante; Razel Nikka M. Hao; Renato Jacinto Q. Mantaring; Rianna Patricia S. Cruz; Rizel A. Medina; Shiela Mae M. Araiza; Yvonne Valerie Austria; Zipporah Mariebelle R. Enriquez; Zryel V. Mollejo |
| EPI_ISL_8532442                                                                                                                                                                                                                                                                                                                                                                                                                                                                                                                                                                                                                                                                                        | Dutch COVID-19 response team                                                                                          | Medical Microbiology, Maastricht University Medical Centre                                                            | Brian van der Veer*; Carmen Reumkens; Christian Hoeb; Erik Beuken; Jozef Dingemans*; Lieke van Alphen; Paul Savelkoul                                                                                                                                                                                                                                                                                                                                                                                                                                                                                                                                                                                                                                                                                                                                                                                                                                                                        |
| EPI_ISL_9085218                                                                                                                                                                                                                                                                                                                                                                                                                                                                                                                                                                                                                                                                                        | Dutch COVID-19 response team                                                                                          | National Institute for Public Health and the Environment (RIVM)                                                       | Adam Meijer; Afke Vogelzang; AnneMarie van den Brandt; Annelies Kroneman; Bas van der Veer; Chantal Reusken; Dennis Schmitz; Dirk Eggink; Florian Zwagemaker; Harry Vennema; Ivo van Walle; Jeroen Cremer; Jil Kocken; Jordy de Bakker; Karim Hajji; Kim Freniks; Linda van Someren; Lisa Wijsman; Lynn Aarts; Rianne Kros; Sanne Bos; Sharon van den Brink; on behalf of the national COVID-19 response team                                                                                                                                                                                                                                                                                                                                                                                                                                                                                                                                                                                |
| EPI_ISL_8798884                                                                                                                                                                                                                                                                                                                                                                                                                                                                                                                                                                                                                                                                                        | ESCENT DIAGNOSTICS PVT. LTD.                                                                                          | INSACOG-IBSD Manipur                                                                                                  | Arvinda Thoudam; Dr. Nanaocha Sharma; Dr. Sunil S Thorat; Khurajam Dolly Devi; Teresa Tangpua                                                                                                                                                                                                                                                                                                                                                                                                                                                                                                                                                                                                                                                                                                                                                                                                                                                                                                |
| EPI_ISL_8917758, EPI_ISL_8918535                                                                                                                                                                                                                                                                                                                                                                                                                                                                                                                                                                                                                                                                       | EXCITE Lab                                                                                                            | Andersen lab at Scripps Research                                                                                      | Abigail Schnapper; Angela Scioscia; Cheryl Anderson; Chip Schooley; Greg Humphrey; Helena Tubb; Natasha Martin; Sawyer Farmer; Smruthi Karthikeyan; Tommy Valles + SEARCH                                                                                                                                                                                                                                                                                                                                                                                                                                                                                                                                                                                                                                                                                                                                                                                                                    |
| EPI_ISL_9323339                                                                                                                                                                                                                                                                                                                                                                                                                                                                                                                                                                                                                                                                                        | Eastern Visayas Regional Medical Center                                                                               | Philippine Genome Center                                                                                              | Alethea R. de Guzman; Alyssa Joyce E. Telles; Angelica A. Garcia; Anna Ong-Lim; Benedict A. Maralit; Carlo M. Lapid; Celia Carlos; Cynthia P. Saloma; Devon Ray Pacial; Diomedes A. Cariño; Edsel Maurice Salvana; El King D. Morado; Elcid Aaron R. Pangilinan; Eva Maria Cutiongo-de la Paz; Francis A. Tablizo; Henrietta Marie Rodriguez; Jaime C. Montoya; Jan Michael C. Yap; Jarvin E. Nipales; Jo-Hannah S. Lames; John Michael Egana; John Q. Wong; Johnny A. Ong; Joshua Gregor A. Dizon; Joshua Jose Endozo; Karol Sophia Agape R. Padilla; Kris P. Punayan; Kristina Patriz Dela Cruz; Lindsay Clare D.L. Carandang; Ma. Exanil Plantig; Marc Edsel C. Ayes; Maria Rosario Singh-Vergeire; Maria Sofia L. Yangzon; Marielle M. Gamboa; Marissa Alejandria; Niña Francesca Bustamante; Razel Nikka M. Hao; Renato Jacinto Q. Mantaring; Rianna Patricia S. Cruz; Rizel A. Medina; Shiela Mae M. Araiza; Yvonne Valerie Austria; Zipporah Mariebelle R. Enriquez; Zryel V. Mollejo |
| EPI_ISL_9197166                                                                                                                                                                                                                                                                                                                                                                                                                                                                                                                                                                                                                                                                                        | Edmonton Provincial Lab                                                                                               | Public Health Agency of Canada (PHAC) National Microbiology Laboratory                                                | Buss; Croxen M; Deo A; Dieu P; E; Ferrato C; Gill K; Koleva P; Li V; Lloyd C; Lynch T; Ma R; Murphy S; Pabbaraju K; Shideler S.; Shokoples S.; Skitsko T; Thayer J; Tipples G; Wong A; Yu C; Zelyas N                                                                                                                                                                                                                                                                                                                                                                                                                                                                                                                                                                                                                                                                                                                                                                                        |
| EPI_ISL_9177577, EPI_ISL_9177606                                                                                                                                                                                                                                                                                                                                                                                                                                                                                                                                                                                                                                                                       | FILINVEST TENT COVID QUARANTINE FACILITY                                                                              | Research Institute for Tropical Medicine                                                                              | Alexander Sadiasa; Anne Pauline A. Alpino; Ardiane Ysabelle M. Dolor; Catalino S. Demetria; Criselda T. Bautista; Francisco Gerardo M. Polotan; Jefferson Earl J. Halog; Joseph Hughes; Kirstyn Brunker; Lei Lanna M. Dancel; Ma. Angelica A. Tujan; Mayan Yu-Lumandas; Othoniel Jan T. Onza; Simon Daldry; Rance Edsel C. Ayes; Maria Rosario Singh-Vergeire; Maria Sofia L. Yangzon; Marielle M. Gamboa; Marissa Alejandria; Niña Francesca Bustamante; Razel Nikka M. Hao; Renato Jacinto Q. Mantaring; Rianna Patricia S. Cruz; Rizel A. Medina; Shiela Mae M. Araiza; Yvonne Valerie Austria; Zipporah Mariebelle R. Enriquez; Zryel V. Mollejo                                                                                                                                                                                                                                                                                                                                         |
| EPI_ISL_8769842, EPI_ISL_8769843, EPI_ISL_8769845                                                                                                                                                                                                                                                                                                                                                                                                                                                                                                                                                                                                                                                      | FOCUS IMAGING & RESEARCH CENTRE PVT.LTD                                                                               | ILBS                                                                                                                  | Arjun Bhugra; Chhagan Bihari Sharma; Ekta Gupta; Pramod Gautam; Rahul Garg; Reshu Agarwal; Shiv Kumar Sarin; Urvinder Kaur; Varun Suroliya                                                                                                                                                                                                                                                                                                                                                                                                                                                                                                                                                                                                                                                                                                                                                                                                                                                   |
| EPI_ISL_9320696, EPI_ISL_9324442, EPI_ISL_9324446                                                                                                                                                                                                                                                                                                                                                                                                                                                                                                                                                                                                                                                      | First Aide Diagnostic Center                                                                                          | Philippine Genome Center                                                                                              | Alethea R. de Guzman; Alyssa Joyce E. Telles; Angelica A. Garcia; Anna Ong-Lim; Benedict A. Maralit; Carlo M. Lapid; Celia Carlos; Cynthia P. Saloma; Devon Ray Pacial; Diomedes A. Cariño; Edsel Maurice Salvana; El King D. Morado; Elcid Aaron R. Pangilinan; Eva Maria Cutiongo-de la Paz; Francis A. Tablizo; Henrietta Marie Rodriguez; Jaime C. Montoya; Jan Michael C. Yap; Jarvin E. Nipales; Jo-Hannah S. Lames; John Michael Egana; John Q. Wong; Johnny A. Ong; Joshua Gregor A. Dizon; Joshua Jose Endozo; Karol Sophia Agape R. Padilla; Kris P. Punayan; Kristina Patriz Dela Cruz; Lindsay Clare D.L. Carandang; Ma. Exanil Plantig; Marc Edsel C. Ayes; Maria Rosario Singh-Vergeire; Maria Sofia L. Yangzon; Marielle M. Gamboa; Marissa Alejandria; Niña Francesca Bustamante; Razel Nikka M. Hao; Renato Jacinto Q. Mantaring; Rianna Patricia S. Cruz; Rizel A. Medina; Shiela Mae M. Araiza; Yvonne Valerie Austria; Zipporah Mariebelle R. Enriquez; Zryel V. Mollejo |
| EPI_ISL_9253352                                                                                                                                                                                                                                                                                                                                                                                                                                                                                                                                                                                                                                                                                        | Foerde Hospital, Department of Microbiology                                                                           | Norwegian Institute of Public Health, Department of Virology                                                          | Atiya R Ali; Debech Nadia; Engebretsen Serina Beate; Garcia Llorente Ignacio; Hiide Elshaug; Hiide Nordby Falkenhau; Hiide Vollan; Jon Bråte; Kamilla Heddeland Instefjord; Karoline Bragstad; Kathrine Stene-Johansen; Line Victoria Moen; Marie Paulsen Madsen; Olav Hungnes; Pedersen Benedikte Nevjen; Rasmus Riis Kopperud                                                                                                                                                                                                                                                                                                                                                                                                                                                                                                                                                                                                                                                              |
| EPI_ISL_8467402, EPI_ISL_8630443, EPI_ISL_8630446                                                                                                                                                                                                                                                                                                                                                                                                                                                                                                                                                                                                                                                      | Fulgent Genetics                                                                                                      | Centers for Disease Control and Prevention Division of Viral Diseases, Pathogen Discovery                             | Becky Tsai; Benafsh Sapra; Benjamin Rambo-Martin; Christopher Gulvick; Clinton Paden; Dakota Howard; Dhvani Batra; Doreen Ng; Duncan MacCannell; Erisa Sula; Harry Gao; James Xie; Jason Caravas; John Gao; Joseph Fierro; Kristine Lacey; Matthew Schmeer; Mickey Li; Peter Cook; Scott Sammons; Shatavia Morrison; Tymeckia Kendall; Victoria Cabani Figueroa; Yan Meng; Yvette Unoarumhi                                                                                                                                                                                                                                                                                                                                                                                                                                                                                                                                                                                                  |
| EPI_ISL_8712552, EPI_ISL_8712553, EPI_ISL_8712562, EPI_ISL_8928530, EPI_ISL_9227195, EPI_ISL_9227214, EPI_ISL_9227215, EPI_ISL_9253310                                                                                                                                                                                                                                                                                                                                                                                                                                                                                                                                                                 | see above                                                                                                             | Fursted Medical Laboratory                                                                                            | Atiya R Ali; Debech Nadia; Engebretsen Serina Beate; Garcia Llorente Ignacio; Hiide Elshaug; Hiide Nordby Falkenhau; Hiide Vollan; Jon Bråte; Kamilla Heddeland Instefjord; Karoline Bragstad; Kathrine Stene-Johansen; Line Victoria Moen; Marie Paulsen Madsen; Olav Hungnes; Pedersen Benedikte Nevjen; Rasmus Riis Kopperud                                                                                                                                                                                                                                                                                                                                                                                                                                                                                                                                                                                                                                                              |
| EPI_ISL_8769848, EPI_ISL_8769849, EPI_ISL_8769850, EPI_ISL_8769853                                                                                                                                                                                                                                                                                                                                                                                                                                                                                                                                                                                                                                     | GENE STORE                                                                                                            | ILBS                                                                                                                  | Arjun Bhugra; Chhagan Bihari Sharma; Ekta Gupta; Pramod Gautam; Rahul Garg; Reshu Agarwal; Shiv Kumar Sarin; Urvinder Kaur; Varun Suroliya                                                                                                                                                                                                                                                                                                                                                                                                                                                                                                                                                                                                                                                                                                                                                                                                                                                   |
| EPI_ISL_8605840                                                                                                                                                                                                                                                                                                                                                                                                                                                                                                                                                                                                                                                                                        | GENOME CENTER, Jashore University of Science and Technology                                                           | GENOME CENTER, Jashore University of Science and Technology                                                           | Hassan M. Al-Emran; Iqbal Kabir Jahid; Md. Ali Ahasan Setu; Md. Anwar Hossain; Md. Rasel Parvez; Md. Shamimur Rahman Prosopto Kumar Das; Md. Shazid Hasan; Shovon Lal Sarkar; Toukir Ahammed                                                                                                                                                                                                                                                                                                                                                                                                                                                                                                                                                                                                                                                                                                                                                                                                 |
| EPI_ISL_8808284                                                                                                                                                                                                                                                                                                                                                                                                                                                                                                                                                                                                                                                                                        | GSII Laboratorium                                                                                                     | National Institute of Health Research and Development                                                                 | Arie Ardiansyah Nugraha; Fajar Nur Sulistiyohadi; Hana Aparsi Pawestri; Hartanti Dian Ikawati; Kartika Dewi Puspa; Nelly Puspandari; Nur Ika Hariastuti; Putri Widia; Subangkit; Vivi Setiawaty                                                                                                                                                                                                                                                                                                                                                                                                                                                                                                                                                                                                                                                                                                                                                                                              |
| EPI_ISL_9686023, EPI_ISL_9686024, EPI_ISL_9686025, EPI_ISL_9686026, EPI_ISL_9686040, EPI_ISL_9686041, EPI_ISL_9686044, EPI_ISL_9686045, EPI_ISL_9686046, EPI_ISL_9686074, EPI_ISL_9686101, EPI_ISL_9686102, EPI_ISL_9686107, EPI_ISL_9686108, EPI_ISL_9686115, EPI_ISL_9696171, EPI_ISL_9696175, EPI_ISL_9696178, EPI_ISL_9696180, EPI_ISL_9696181, EPI_ISL_9696182, EPI_ISL_9696185, EPI_ISL_9696186, EPI_ISL_9696187, EPI_ISL_9696189, EPI_ISL_9696190                                                                                                                                                                                                                                               | see above                                                                                                             | Gandhi Hospital                                                                                                       | Arunkumar Karunanidhi; Ashwin Dalal; Asmita Gupta; Divya Vashishta; Murali Bhashyam; Nagamani Kamilli; Rupin Shelake; Vinay Donipadi                                                                                                                                                                                                                                                                                                                                                                                                                                                                                                                                                                                                                                                                                                                                                                                                                                                         |
| EPI_ISL_8452449, EPI_ISL_8452453, EPI_ISL_8452455, EPI_ISL_8452458, EPI_ISL_8452459, EPI_ISL_8452463, EPI_ISL_8452468, EPI_ISL_8452469, EPI_ISL_8452470, EPI_ISL_8452472, EPI_ISL_8452473, EPI_ISL_8452478, EPI_ISL_8452480, EPI_ISL_8452493, EPI_ISL_8452494, EPI_ISL_8452496, EPI_ISL_8452497, EPI_ISL_8452498, EPI_ISL_8452500, EPI_ISL_8452505, EPI_ISL_8452506, EPI_ISL_8452508                                                                                                                                                                                                                                                                                                                   | see above                                                                                                             | Gandhi Medical College and Hospital (GMCH), Secunderabad                                                              | D.R.Manisha Rani; Dr.G.Sushma Rajya Lakshmi; Dr.K.Nagamani; Dr.Sunitha Pakalapaty                                                                                                                                                                                                                                                                                                                                                                                                                                                                                                                                                                                                                                                                                                                                                                                                                                                                                                            |
| EPI_ISL_8652325, EPI_ISL_8652326, EPI_ISL_8652327, EPI_ISL_8652329, EPI_ISL_8652330, EPI_ISL_8652331, EPI_ISL_8652332, EPI_ISL_8652432, EPI_ISL_9678117                                                                                                                                                                                                                                                                                                                                                                                                                                                                                                                                                | see above                                                                                                             | Genepath, Pune                                                                                                        | Aurnab Ghose; Joy Merwin Monteiro; Krishanpal Karmodiya; Nikhil Phadke; Shatakshi Ranade                                                                                                                                                                                                                                                                                                                                                                                                                                                                                                                                                                                                                                                                                                                                                                                                                                                                                                     |
| EPI_ISL_9779372                                                                                                                                                                                                                                                                                                                                                                                                                                                                                                                                                                                                                                                                                        | Government Fever Hospital                                                                                             | Centre for DNA Fingerprinting and Diagnostics                                                                         | Arunkumar Karunanidhi; Ashwin Dalal; Asmita Gupta; Divya Vashishta; Murali Bhashyam; Nagamani Kamilli; Rupin Shelake; Vinay Donipadi                                                                                                                                                                                                                                                                                                                                                                                                                                                                                                                                                                                                                                                                                                                                                                                                                                                         |
| EPI_ISL_8497549, EPI_ISL_8497550                                                                                                                                                                                                                                                                                                                                                                                                                                                                                                                                                                                                                                                                       | Green Cross Pathology & Molecular Laboratory, Ahmedabad                                                               | Gujarat Biotechnology Research Centre                                                                                 | Akhilesh Modi; Apurvasinh Puvar; Bhadeshsinh Gohil; Chaitanya Joshi; Disha Vora; Janvi Raval; Jaykumar Rangani; Madhvi Joshi; Narendra Patel; Nimesh Patel; Nitin Savaliya; Nitin Shukla; Priyank Chavda; Ramesh Pandit; Roshani Mishra; Sonal Sharma; Tasnim Trivedi; Zarna Patel                                                                                                                                                                                                                                                                                                                                                                                                                                                                                                                                                                                                                                                                                                           |
| EPI_ISL_8546773                                                                                                                                                                                                                                                                                                                                                                                                                                                                                                                                                                                                                                                                                        | Green cross Genetic Lab Pvt. Ltd., Ahmedabad                                                                          | Gujarat Biotechnology Research Centre                                                                                 | Akhilesh Modi; Apurvasinh Puvar; Bhadeshsinh Gohil; Chaitanya Joshi; Disha Vora; Janvi Raval; Jaykumar Rangani; Madhvi Joshi; Nimesh Patel; Nitin Savaliya; Nitin Shukla; Priyank Chavda; Ramesh Pandit; Roshani Mishra; Sonal Sharma; Tasnim Trivedi; Umang Patel; Zarna Patel                                                                                                                                                                                                                                                                                                                                                                                                                                                                                                                                                                                                                                                                                                              |
| EPI_ISL_8207301                                                                                                                                                                                                                                                                                                                                                                                                                                                                                                                                                                                                                                                                                        | Guangdong Center for Disease Control and Prevention                                                                   | National Institute for Viral Disease Control and Prevention, China CDC                                                | Aiping Deng; Baisheng Li; Cao Chen; Lijun Liang; Lirong Zou; Qianfang Guo; Ruhan A; Xiang Zhao; Yao Hu; Zhonghua Zheng                                                                                                                                                                                                                                                                                                                                                                                                                                                                                                                                                                                                                                                                                                                                                                                                                                                                       |
| EPI_ISL_8342883                                                                                                                                                                                                                                                                                                                                                                                                                                                                                                                                                                                                                                                                                        | Gujarat Pathology Laboratory, Ahmedabad                                                                               | Gujarat Biotechnology Research Centre                                                                                 | Akhilesh Modi; Apurvasinh Puvar; Bhadeshsinh Gohil; Chaitanya Joshi; Disha Vora; Janvi Raval; Jaykumar Rangani; Madhvi Joshi; Nimesh Patel; Niraj Kothari; Nitin Savaliya; Nitin Shukla; Priyank Chavda; Ramesh Pandit; Roshani Mishra; Sonal Sharma; Tasnim Trivedi; Zarna Patel                                                                                                                                                                                                                                                                                                                                                                                                                                                                                                                                                                                                                                                                                                            |
| EPI_ISL_8166604, EPI_ISL_8565060                                                                                                                                                                                                                                                                                                                                                                                                                                                                                                                                                                                                                                                                       | HOUSE OF DIAGNOSTICS                                                                                                  | ILBS                                                                                                                  | Arjun Bhugra; Chhagan Bihari Sharma; Ekta Gupta; Pramod Gautam; Rahul Garg; Reshu Agarwal; Shiv Kumar Sarin; Urvinder Kaur; Varun Suroliya                                                                                                                                                                                                                                                                                                                                                                                                                                                                                                                                                                                                                                                                                                                                                                                                                                                   |
| EPI_ISL_9643317, EPI_ISL_9643318, EPI_ISL_9643319, EPI_ISL_9643320, EPI_ISL_9643321, EPI_ISL_9643322, EPI_ISL_9643323                                                                                                                                                                                                                                                                                                                                                                                                                                                                                                                                                                                  | see above                                                                                                             | Home Quarantine Taskforce                                                                                             | Alan K.L. Tsang; Edman T.K. Lam; Ken H.L. Ng; Patricia K. L. Leung; Peter C.W. Yip; Rickjason C.W. Chan                                                                                                                                                                                                                                                                                                                                                                                                                                                                                                                                                                                                                                                                                                                                                                                                                                                                                      |
| EPI_ISL_8769560, EPI_ISL_8769561, EPI_ISL_8769562, EPI_ISL_8769563, EPI_ISL_8769573                                                                                                                                                                                                                                                                                                                                                                                                                                                                                                                                                                                                                    | House of Diagnostics                                                                                                  | ILBS                                                                                                                  | Arjun Bhugra; Chhagan Bihari Sharma; Ekta Gupta; Pramod Gautam; Rahul Garg; Reshu Agarwal; Shiv Kumar Sarin; Urvinder Kaur; Varun Suroliya                                                                                                                                                                                                                                                                                                                                                                                                                                                                                                                                                                                                                                                                                                                                                                                                                                                   |
| EPI_ISL_9418897, EPI_ISL_9418899, EPI_ISL_9418900, EPI_ISL_9418901, EPI_ISL_9418912, EPI_ISL_9418926, EPI_ISL_9418937, EPI_ISL_9418950, EPI_ISL_9418955, EPI_ISL_9418959, EPI_ISL_9418961, EPI_ISL_9418966, EPI_ISL_9419069, EPI_ISL_9419070, EPI_ISL_9419071, EPI_ISL_9419073, EPI_ISL_9419076, EPI_ISL_9419078, EPI_ISL_9419079, EPI_ISL_9419113, EPI_ISL_9419116, EPI_ISL_9419117, EPI_ISL_9419118, EPI_ISL_9494635, EPI_ISL_9494639, EPI_ISL_9494574, EPI_ISL_9494592, EPI_ISL_9494635, EPI_ISL_9494649, EPI_ISL_9494720, EPI_ISL_9494723, EPI_ISL_9494771, EPI_ISL_9494783, EPI_ISL_9494878, EPI_ISL_9494808, EPI_ISL_9494815, EPI_ISL_9494831, EPI_ISL_9494833, EPI_ISL_9494852, EPI_ISL_9494949 | see above                                                                                                             | ICMR-National Institute of Virology - INSACOG                                                                         | Dr. Varsha Potdar and NIC Team                                                                                                                                                                                                                                                                                                                                                                                                                                                                                                                                                                                                                                                                                                                                                                                                                                                                                                                                                               |
| EPI_ISL_8859063                                                                                                                                                                                                                                                                                                                                                                                                                                                                                                                                                                                                                                                                                        | IDSP, Kamrup Metro                                                                                                    | Centre for Infectious Diseases, CSIR-NEIST                                                                            | G Narahari Sastry; Gayatri Gooqi; Jatin Kalita; Moirangthem G Singh; Munmi Bora; Pankaj Bhalari; Prasenjit Manna; Romi Wahengbam; Tridip Phukan; Yasmin B Tapaddar                                                                                                                                                                                                                                                                                                                                                                                                                                                                                                                                                                                                                                                                                                                                                                                                                           |
| EPI_ISL_9161106, EPI_ISL_9161702, EPI_ISL_9184187,                                                                                                                                                                                                                                                                                                                                                                                                                                                                                                                                                                                                                                                     | IHU Mediterranean Infection                                                                                           | IHU Mediterranean Infection                                                                                           | Philippe Colson; Philippe Colson et al.; et al.                                                                                                                                                                                                                                                                                                                                                                                                                                                                                                                                                                                                                                                                                                                                                                                                                                                                                                                                              |



|                                                                                                                                                                                                                                                                                                                                                                                                                                                                                                                                                                                                                                                                                                                                                                                                                                                                                                                                                                                                                                                                             |                                                                                                                                                                                                           |                                                                                                                                                                                                                                                                                                                                                                                                                                                                                                                                                                                                                                                                                                                                                                                                                                                                                                                                                                                                                          |
|-----------------------------------------------------------------------------------------------------------------------------------------------------------------------------------------------------------------------------------------------------------------------------------------------------------------------------------------------------------------------------------------------------------------------------------------------------------------------------------------------------------------------------------------------------------------------------------------------------------------------------------------------------------------------------------------------------------------------------------------------------------------------------------------------------------------------------------------------------------------------------------------------------------------------------------------------------------------------------------------------------------------------------------------------------------------------------|-----------------------------------------------------------------------------------------------------------------------------------------------------------------------------------------------------------|--------------------------------------------------------------------------------------------------------------------------------------------------------------------------------------------------------------------------------------------------------------------------------------------------------------------------------------------------------------------------------------------------------------------------------------------------------------------------------------------------------------------------------------------------------------------------------------------------------------------------------------------------------------------------------------------------------------------------------------------------------------------------------------------------------------------------------------------------------------------------------------------------------------------------------------------------------------------------------------------------------------------------|
| EPI_ISL_8541136,<br>EPI_ISL_8541137,<br>EPI_ISL_8541138                                                                                                                                                                                                                                                                                                                                                                                                                                                                                                                                                                                                                                                                                                                                                                                                                                                                                                                                                                                                                     | Research, R. G. Lugar Center for Public Health Research, National Center for Disease Control and Public Health (NCDC) of Georgia.                                                                         | Sidamonidze; Khatuna Zakhshvili; Lela Sabadze; Lela Urushadze; Magda Dgebuadze; Maia Alkhashvili; Mari Gavashelidze; Mariam Zakalashvili; Marine Murtskhvaladze; Meri Pantsulaia; Nato Kotaria; Nino Berishvili; Paata Innadze; Roena Sukhishvili; Salome Javashvili; Tamar Jashishvili; Tata Innadze; Tea Tsvetadze                                                                                                                                                                                                                                                                                                                                                                                                                                                                                                                                                                                                                                                                                                     |
| EPI_ISL_9323166                                                                                                                                                                                                                                                                                                                                                                                                                                                                                                                                                                                                                                                                                                                                                                                                                                                                                                                                                                                                                                                             | Jose B. Lingad Memorial General Hospital                                                                                                                                                                  | Philippine Genome Center<br>Alethea R. de Guzman; Alyssa Joyce E. Telles; Angelica A. Garcia; Anna Ong-Lim; Benedict A. Maralit; Carlo M. Lapid; Celia Carlos; Cynthia P. Saloma; Devon Ray Pacial; Diomedes A. Cariño; Edsel Maurice Salvana; El King D. Morado; Elcid Aaron R. Pangilinan; Eva Maria Cutiongo-de la Paz; Francis A. Tablizo; Henrietta Marie Rodriguez; Jaime C. Montoya; Jan Michael C. Yap; Jarvin E. Nipales; Jo-Hannah S. Lames; John Michael Egana; John Q. Wong; Johnny A. Ong; Joshua Gregor A. Dizon; Joshua Jose Endozo; Karol Sophia Agape R. Padilla; Kris P. Punayan; Kristina Patriz Dela Cruz; Lindsay Clare D.L. Carandang; Ma. Exanil Plantig; Marc Edsel C. Ayes; Maria Rosario Singh-Vergeire; Maria Sofia L. Yangzon; Marielle M. Gamboa; Marissa Alejandria; Niña Francesca Bustamante; Razel Nikka M. Hao; Renato Jacinto Q. Mantaring; Rianna Patricia S. Cruz; Razel A. Medina; Shiela Mae M. Araiza; Yvonne Valerie Austria; Zipporah Mariebelle R. Enriquez; Zyrel V. Mollejo |
| EPI_ISL_7971635,<br>EPI_ISL_9201493,<br>EPI_ISL_9201500,<br>EPI_ISL_9201507,<br>EPI_ISL_9401698,<br>EPI_ISL_9401700                                                                                                                                                                                                                                                                                                                                                                                                                                                                                                                                                                                                                                                                                                                                                                                                                                                                                                                                                         | KIMBERLEY LABORATORY                                                                                                                                                                                      | National Institute for Communicable Diseases of the National Health Laboratory Service<br>Amoako DG; Bhiman JN; Everatt J; Ismail A; Kekana D; Mahlangu B; Mnguni A; Mohale T; Ntuli N; Scheepers C; Wolter N                                                                                                                                                                                                                                                                                                                                                                                                                                                                                                                                                                                                                                                                                                                                                                                                            |
| EPI_ISL_8708955,<br>EPI_ISL_8725069                                                                                                                                                                                                                                                                                                                                                                                                                                                                                                                                                                                                                                                                                                                                                                                                                                                                                                                                                                                                                                         | KKP Kelas 1 Soekarno-Hatta (ILab)                                                                                                                                                                         | National Institute of Health Research and Development<br>Arie Ardiansyah Nugraha; Fajar Nur Sulistiyohadi; Hana Aparsi Pawestri; Hartanti Dian Ikwati; Kartika Dewi Puspa; Nelly Puspandari; Nur Ika Hariastuti; Putri Widia; Subangkit; Vivi Setiawaty                                                                                                                                                                                                                                                                                                                                                                                                                                                                                                                                                                                                                                                                                                                                                                  |
| EPI_ISL_9322758                                                                                                                                                                                                                                                                                                                                                                                                                                                                                                                                                                                                                                                                                                                                                                                                                                                                                                                                                                                                                                                             | Kairos Diagnostics Laboratory                                                                                                                                                                             | Philippine Genome Center<br>Alethea R. de Guzman; Alyssa Joyce E. Telles; Angelica A. Garcia; Anna Ong-Lim; Benedict A. Maralit; Carlo M. Lapid; Celia Carlos; Cynthia P. Saloma; Devon Ray Pacial; Diomedes A. Cariño; Edsel Maurice Salvana; El King D. Morado; Elcid Aaron R. Pangilinan; Eva Maria Cutiongo-de la Paz; Francis A. Tablizo; Henrietta Marie Rodriguez; Jaime C. Montoya; Jan Michael C. Yap; Jarvin E. Nipales; Jo-Hannah S. Lames; John Michael Egana; John Q. Wong; Johnny A. Ong; Joshua Gregor A. Dizon; Joshua Jose Endozo; Karol Sophia Agape R. Padilla; Kris P. Punayan; Kristina Patriz Dela Cruz; Lindsay Clare D.L. Carandang; Ma. Exanil Plantig; Marc Edsel C. Ayes; Maria Rosario Singh-Vergeire; Maria Sofia L. Yangzon; Marielle M. Gamboa; Marissa Alejandria; Niña Francesca Bustamante; Razel Nikka M. Hao; Renato Jacinto Q. Mantaring; Rianna Patricia S. Cruz; Razel A. Medina; Shiela Mae M. Araiza; Yvonne Valerie Austria; Zipporah Mariebelle R. Enriquez; Zyrel V. Mollejo |
| EPI_ISL_9097416                                                                                                                                                                                                                                                                                                                                                                                                                                                                                                                                                                                                                                                                                                                                                                                                                                                                                                                                                                                                                                                             | Kaiser Permanente Southern California                                                                                                                                                                     | Helix<br>Helix; Kaiser Permanente Southern California                                                                                                                                                                                                                                                                                                                                                                                                                                                                                                                                                                                                                                                                                                                                                                                                                                                                                                                                                                    |
| EPI_ISL_8646606,<br>EPI_ISL_8646609                                                                                                                                                                                                                                                                                                                                                                                                                                                                                                                                                                                                                                                                                                                                                                                                                                                                                                                                                                                                                                         | Karolinska University Hospital Huddinge                                                                                                                                                                   | Karolinska University Hospital<br>Annika Tiveljung Lindell; Henning Onsrbing; Jan Albert; Karina Henrich; Lynda Eneh; Maria Ropat; Martin Ekman; Natalija Gerasimcik; Robert Dyrdak; Sandra Brodsson; Shambhu Ganeshappa Aralaguppe; Tanja Normark; Tobias Allander; Valterri Wirta; Zhibing Yun                                                                                                                                                                                                                                                                                                                                                                                                                                                                                                                                                                                                                                                                                                                         |
| EPI_ISL_8646424,<br>EPI_ISL_8646473                                                                                                                                                                                                                                                                                                                                                                                                                                                                                                                                                                                                                                                                                                                                                                                                                                                                                                                                                                                                                                         | Karolinska University Hospital Solna                                                                                                                                                                      | Karolinska University Hospital<br>Annika Tiveljung Lindell; Henning Onsrbing; Jan Albert; Karina Henrich; Lynda Eneh; Maria Ropat; Martin Ekman; Natalija Gerasimcik; Robert Dyrdak; Sandra Brodsson; Shambhu Ganeshappa Aralaguppe; Tanja Normark; Tobias Allander; Valterri Wirta; Zhibing Yun                                                                                                                                                                                                                                                                                                                                                                                                                                                                                                                                                                                                                                                                                                                         |
| EPI_ISL_9128484                                                                                                                                                                                                                                                                                                                                                                                                                                                                                                                                                                                                                                                                                                                                                                                                                                                                                                                                                                                                                                                             | Kasemrad Hospital Prachachuen                                                                                                                                                                             | National Institute of Health, Department of Medical Sciences, Ministry of Public Health, Thailand<br>Archawin Rojanawiwat; Natchaya Khidsang; Nuttida Thongpramul; Pakorn Piromtong; Pilailuk Okada; Sirikanda Wimol; Siriraporn Phuyugun; Sunthareeya Waicharoen; Suratchana Mitrat; Thanutsapa Thanadachakul                                                                                                                                                                                                                                                                                                                                                                                                                                                                                                                                                                                                                                                                                                           |
| EPI_ISL_8693579, EPI_ISL_8693587, EPI_ISL_8712911, EPI_ISL_8712919, EPI_ISL_8712926, EPI_ISL_8712943, EPI_ISL_8712945, EPI_ISL_8712961, EPI_ISL_8712962, EPI_ISL_8712963, EPI_ISL_8712966, EPI_ISL_8712970, EPI_ISL_8712974, EPI_ISL_8712992, EPI_ISL_8712994, EPI_ISL_8712995, EPI_ISL_8713003, EPI_ISL_8713015, EPI_ISL_8713016, EPI_ISL_8713017, EPI_ISL_8713018, EPI_ISL_8713044, EPI_ISL_8713056, EPI_ISL_8713062, EPI_ISL_8713079, EPI_ISL_8713083, EPI_ISL_8713104, EPI_ISL_8713107, EPI_ISL_8713108, EPI_ISL_8713133, EPI_ISL_8713161, EPI_ISL_8713170, EPI_ISL_8713177, EPI_ISL_8713204, EPI_ISL_8713213, EPI_ISL_8713227, EPI_ISL_8713236, EPI_ISL_8713237, EPI_ISL_8713238, EPI_ISL_8713242, EPI_ISL_9512065, EPI_ISL_9512066, EPI_ISL_9512067, EPI_ISL_9512068, EPI_ISL_9512069, EPI_ISL_9512071, EPI_ISL_9512072, EPI_ISL_9512073, EPI_ISL_9512076, EPI_ISL_9512078, EPI_ISL_9512079, EPI_ISL_9512080, EPI_ISL_9512102, EPI_ISL_9512111, EPI_ISL_9512170, EPI_ISL_9512173, EPI_ISL_9512216, EPI_ISL_9512220, EPI_ISL_9512221, EPI_ISL_9512227, EPI_ISL_9512235 | see above<br>Kasturba Hospital Molecular Lab - INSCOG<br>Kasturba hospital WGS<br>Jayanthi Shastri; Vidushi Chitala                                                                                       |                                                                                                                                                                                                                                                                                                                                                                                                                                                                                                                                                                                                                                                                                                                                                                                                                                                                                                                                                                                                                          |
| EPI_ISL_8412681                                                                                                                                                                                                                                                                                                                                                                                                                                                                                                                                                                                                                                                                                                                                                                                                                                                                                                                                                                                                                                                             | Kerckhoff-Klinik GmbH                                                                                                                                                                                     | Robert Koch Institute<br>Amita Jain; Babita; Priti Prasad; Samir V Sawant; Shantanu Prakash; Sumit K Bag; Suruchi Shukla; Tripti Rungta                                                                                                                                                                                                                                                                                                                                                                                                                                                                                                                                                                                                                                                                                                                                                                                                                                                                                  |
| EPI_ISL_9244090, EPI_ISL_9244092, EPI_ISL_9244099, EPI_ISL_9244100, EPI_ISL_9244105, EPI_ISL_9244107, EPI_ISL_9244110, EPI_ISL_9244112, EPI_ISL_9244113, EPI_ISL_9244114, EPI_ISL_9244115, EPI_ISL_9244116, EPI_ISL_9244117, EPI_ISL_9244124, EPI_ISL_9244136, EPI_ISL_9244145, EPI_ISL_9244146, EPI_ISL_9244249, EPI_ISL_9244250, EPI_ISL_9244255, EPI_ISL_9244263, EPI_ISL_9244264, EPI_ISL_9244265, EPI_ISL_9244266, EPI_ISL_9244269, EPI_ISL_9244270, EPI_ISL_9244272, EPI_ISL_9244273, EPI_ISL_9244274, EPI_ISL_9244275, EPI_ISL_9244276, EPI_ISL_9244277, EPI_ISL_9244278, EPI_ISL_9244284, EPI_ISL_9244287, EPI_ISL_9244288, EPI_ISL_9244289, EPI_ISL_9244290, EPI_ISL_9244310, EPI_ISL_9244311, EPI_ISL_9244380, EPI_ISL_9244398, EPI_ISL_9244408, EPI_ISL_9244425, EPI_ISL_9244432, EPI_ISL_9244447, EPI_ISL_9244448, EPI_ISL_9244450, EPI_ISL_9244451, EPI_ISL_9244454                                                                                                                                                                                            | see above<br>King George's Medical University<br>CSIR-National Botanical Research Institute<br>Hrvatski zavod za javno zdravstvo<br>Anita Juric; Dragan Juric; Irena Tabain; Ivana Ferenčak; Josipa Kuzle |                                                                                                                                                                                                                                                                                                                                                                                                                                                                                                                                                                                                                                                                                                                                                                                                                                                                                                                                                                                                                          |
| EPI_ISL_9148491                                                                                                                                                                                                                                                                                                                                                                                                                                                                                                                                                                                                                                                                                                                                                                                                                                                                                                                                                                                                                                                             | Klinika za infektivne bolesti "Dr. Fran Mihaljević"                                                                                                                                                       | Institute for Medical Research, Infectious Disease Research Centre, National Institutes of Health, Ministry of Health Malaysia<br>Ahmad FA; Ahmad Fazilah NA; Anasir MI; Azizan MA; Kamel K; Mohamad Sukri MZ; Norhisham SN; Ramly N; Robert F; Rosli NR; Supiah J; Thayan R                                                                                                                                                                                                                                                                                                                                                                                                                                                                                                                                                                                                                                                                                                                                             |
| EPI_ISL_9095261,<br>EPI_ISL_9095272                                                                                                                                                                                                                                                                                                                                                                                                                                                                                                                                                                                                                                                                                                                                                                                                                                                                                                                                                                                                                                         | Kuala Lumpur International Airport (KLIA) Health Office                                                                                                                                                   | CNR Virus des Infections Respiratoires - France SUD<br>Antonin Bal; Bruno Lina; Bruno Simon; Gregory Destras; Gwendolyne Burfin; Hadrien Regue; Laurence Josset; Martine Valette; Quentin Semanas; Théophile Boyer                                                                                                                                                                                                                                                                                                                                                                                                                                                                                                                                                                                                                                                                                                                                                                                                       |
| EPI_ISL_8670699,<br>EPI_ISL_9798319,<br>EPI_ISL_9798321,<br>EPI_ISL_9798323,<br>EPI_ISL_9798327,<br>EPI_ISL_9798328                                                                                                                                                                                                                                                                                                                                                                                                                                                                                                                                                                                                                                                                                                                                                                                                                                                                                                                                                         | LABM CH MONTAUBAN<br>LABORATOIRE LBA JAYAN AGEN                                                                                                                                                           | CNR Virus des Infections Respiratoires - France SUD<br>Antonin Bal; Bruno Lina; Bruno Simon; Gregory Destras; Gwendolyne Burfin; Hadrien Regue; Laurence Josset; Martine Valette; Quentin Semanas; Théophile Boyer                                                                                                                                                                                                                                                                                                                                                                                                                                                                                                                                                                                                                                                                                                                                                                                                       |
| EPI_ISL_8239468                                                                                                                                                                                                                                                                                                                                                                                                                                                                                                                                                                                                                                                                                                                                                                                                                                                                                                                                                                                                                                                             | LADR Zentrallabor DR. Kramer & Kollegen Geesthacht                                                                                                                                                        | Robert Koch Institute                                                                                                                                                                                                                                                                                                                                                                                                                                                                                                                                                                                                                                                                                                                                                                                                                                                                                                                                                                                                    |
| EPI_ISL_9803031                                                                                                                                                                                                                                                                                                                                                                                                                                                                                                                                                                                                                                                                                                                                                                                                                                                                                                                                                                                                                                                             | LAKEWOOD HEALTH SYSTEM - STAPLES CLINIC                                                                                                                                                                   | Minnesota Department of Health, Public Health Laboratory<br>Alyssa Mondelli; Elizabeth Horn; Haejin Hwang; Jacob Garfin; Kelly Pung; Matt Plumb; Sarah Namugenyi; and Xiong Wang                                                                                                                                                                                                                                                                                                                                                                                                                                                                                                                                                                                                                                                                                                                                                                                                                                         |
| EPI_ISL_9798984,<br>EPI_ISL_8786663                                                                                                                                                                                                                                                                                                                                                                                                                                                                                                                                                                                                                                                                                                                                                                                                                                                                                                                                                                                                                                         | LAM BIO 86 SITE DE CHAUMONT<br>LAM BIOPOLE ORTHEZ                                                                                                                                                         | CNR Virus des Infections Respiratoires - France SUD<br>Antonin Bal; Bruno Lina; Bruno Simon; Gregory Destras; Gwendolyne Burfin; Hadrien Regue; Laurence Josset; Martine Valette; Quentin Semanas; Théophile Boyer                                                                                                                                                                                                                                                                                                                                                                                                                                                                                                                                                                                                                                                                                                                                                                                                       |
| EPI_ISL_9201591,<br>EPI_ISL_9201593,<br>EPI_ISL_9201610,<br>EPI_ISL_9201612,<br>EPI_ISL_9201615,<br>EPI_ISL_9201625                                                                                                                                                                                                                                                                                                                                                                                                                                                                                                                                                                                                                                                                                                                                                                                                                                                                                                                                                         | LANCET                                                                                                                                                                                                    | National Institute for Communicable Diseases of the National Health Laboratory Service<br>Amoako DG; Bhiman JN; Everatt J; Ismail A; Kekana D; Mahlangu B; Mnguni A; Mohale T; Ntuli N; Scheepers C; Wolter N                                                                                                                                                                                                                                                                                                                                                                                                                                                                                                                                                                                                                                                                                                                                                                                                            |
| EPI_ISL_7701117, EPI_ISL_7701120, EPI_ISL_7701122, EPI_ISL_7701125, EPI_ISL_7701127, EPI_ISL_7701129, EPI_ISL_7701131, EPI_ISL_7701134, EPI_ISL_7701136                                                                                                                                                                                                                                                                                                                                                                                                                                                                                                                                                                                                                                                                                                                                                                                                                                                                                                                     | see above<br>LANCET LABORATORY                                                                                                                                                                            | National Institute for Communicable Diseases of the National Health Laboratory Service<br>Amoako DG; Bhiman JN; Everatt J; Ismail A; Mahlangu B; Mnguni A; Mohale T; Ntuli N; Scheepers C; Wolter N                                                                                                                                                                                                                                                                                                                                                                                                                                                                                                                                                                                                                                                                                                                                                                                                                      |
| EPI_ISL_8799194                                                                                                                                                                                                                                                                                                                                                                                                                                                                                                                                                                                                                                                                                                                                                                                                                                                                                                                                                                                                                                                             | LEBOWAGOMO LABORATORY                                                                                                                                                                                     | National Institute for Communicable Diseases of the National Health Laboratory Service<br>Amoako DG; Bhiman JN; Everatt J; Ismail A; Kekana D; Mahlangu B; Mnguni A; Mohale T; Ntuli N; Scheepers C; Wolter N                                                                                                                                                                                                                                                                                                                                                                                                                                                                                                                                                                                                                                                                                                                                                                                                            |
| EPI_ISL_8166509,<br>EPI_ISL_9679582                                                                                                                                                                                                                                                                                                                                                                                                                                                                                                                                                                                                                                                                                                                                                                                                                                                                                                                                                                                                                                         | LIFELINE LABORATORY<br>LIVINGSTONE LABORATORY                                                                                                                                                             | ILBS<br>National Institute for Communicable Diseases of the National Health Laboratory Service<br>Arjun Bhugra; Chhagan Bihari Sharma; Ekta Gupta; Pramod Gautam; Rahul Garg; Reshu Agarwal; Shiv Kumar Sarin; Urviinder Kaur; Varun Suroliya<br>Amoako DG; Bhiman JN; Everatt J; Ismail A; Kekana D; Mahlangu B; Mnguni A; Mohale T; Ntuli N; Scheepers C; Wolter N                                                                                                                                                                                                                                                                                                                                                                                                                                                                                                                                                                                                                                                     |
| EPI_ISL_8648633                                                                                                                                                                                                                                                                                                                                                                                                                                                                                                                                                                                                                                                                                                                                                                                                                                                                                                                                                                                                                                                             | LabPLUS                                                                                                                                                                                                   | Institute of Environmental Science and Research (ESR)<br>Anja Werno; Antje van der Linden; Arlo Upton; Chris Mansell; Clare Gebbie; David Hammer; Dhanisha Patel; Dragana Drinkovic; Erasmus Smit; Gary McAuliffe; Hana Sofia Andersson; Hermes Pestre; James Ussher; Jill Sherwood; Jing Wang; Joep de Ligt; Josh Freeman; Julia Howard; Juliet Elvy; Lauren Jelly; Mary DeAlmeida; Matt Blackiston; Matt Storey; Matthew Rogers; Max Bloomfield; Michael Adedile; Michelle Bain; Muhammad Faisal; Nikki Freed; Olin Silander; Olivia Stroeve; Rachel Boyle; Sally Roberts; SallyAnn Harbison; Sarah Cockerton; Sarah Jefferies; Sharmini Muttaiyah; Susan Morpeth; Susan Taylor; Timothy Blackmore; Vani Sathyandran; Veronica Playle; Virginia Hoyle; Xiaoyun Ren                                                                                                                                                                                                                                                     |
| EPI_ISL_8789869                                                                                                                                                                                                                                                                                                                                                                                                                                                                                                                                                                                                                                                                                                                                                                                                                                                                                                                                                                                                                                                             | Labo Analyses Med                                                                                                                                                                                         | National Reference Center for Viruses of Respiratory Infections, Institut Pasteur, Paris<br>Angela Brisebarre; Camille Capel; Christophe Malabat; Corinne Mautrais; Etienne Simon-Lorière; Frédéric Lemoine; Julian Fumey; Louise Lefrançois; Marion Barbet; Maud Vanpeene; Méline Bizard; Slim El Khiairi; Sylvie Behillili; Sylvie Van der Werf; Vincent Enouf; XAVIER GUETTIER                                                                                                                                                                                                                                                                                                                                                                                                                                                                                                                                                                                                                                        |
| EPI_ISL_8927120                                                                                                                                                                                                                                                                                                                                                                                                                                                                                                                                                                                                                                                                                                                                                                                                                                                                                                                                                                                                                                                             | Labor Berlin Charité Vivantes GmbH / Institut für Virologie                                                                                                                                               | Charité Universitätsmedizin Berlin, Institut für Virologie/Labor Berlin<br>Barbara Mühlemann; Christian Drosten; Christine Stephan; Peter Menzel; Rolf Schwarzer; Terry Jones; Victor M Corman                                                                                                                                                                                                                                                                                                                                                                                                                                                                                                                                                                                                                                                                                                                                                                                                                           |
| EPI_ISL_8790698                                                                                                                                                                                                                                                                                                                                                                                                                                                                                                                                                                                                                                                                                                                                                                                                                                                                                                                                                                                                                                                             | Labor team w AG                                                                                                                                                                                           | Department of Biosystems Science and Engineering, ETH Zürich<br>Andrea Patrignani; Andreas Lindauer; Andrea Cabral de Gouveia; Catharine Aquino Fournier; Chaoran Chen; Christian Urban; Daniel Ehrsam; David Dreifuss; Doris Popovic; Franziska Singer; Griffin White; Hai Bai; Isabel Stürmer; Ivan Topolsky; Jay Tracy; Kim Philipp Jablonski; Lara Fuhrmann; Laura Neff; Lennart Opitz; Louis du Plessis; Maria Domenica Mocca; Matteo Carrara; Monika Bucher; Niko Beerenwinkel; Pelin Iker; Ralph Schlapbach; Rebekka Pohl; Sarah Nadeau; Shuqing Yu; Simon Grüter; Tanja Stadler; Timothy Sykes                                                                                                                                                                                                                                                                                                                                                                                                                   |
| EPI_ISL_9320872, EPI_ISL_9320874, EPI_ISL_9321842, EPI_ISL_9321956, EPI_ISL_9321958, EPI_ISL_9321963, EPI_ISL_9321968, EPI_ISL_9321970, EPI_ISL_9321973, EPI_ISL_9322771, EPI_ISL_9322772, EPI_ISL_9322773, EPI_ISL_9322774, EPI_ISL_9322775, EPI_ISL_9322776, EPI_ISL_9322777, EPI_ISL_9322778, EPI_ISL_9322781, EPI_ISL_9322782, EPI_ISL_9322783, EPI_ISL_9322784, EPI_ISL_9322785, EPI_ISL_9322787, EPI_ISL_9322788, EPI_ISL_9324454, EPI_ISL_9324455, EPI_ISL_9324458                                                                                                                                                                                                                                                                                                                                                                                                                                                                                                                                                                                                   | see above<br>Laguna Provincial Hospital - San Pablo City District Hospital                                                                                                                                | Philippine Genome Center<br>Alethea R. de Guzman; Alyssa Joyce E. Telles; Angelica A. Garcia; Anna Ong-Lim; Benedict A. Maralit; Carlo M. Lapid; Celia Carlos; Cynthia P. Saloma; Devon Ray Pacial; Diomedes A. Cariño; Edsel Maurice Salvana; El King D. Morado; Elcid Aaron R. Pangilinan; Eva Maria Cutiongo-de la Paz; Francis A. Tablizo; Henrietta Marie Rodriguez; Jaime C. Montoya; Jan Michael C. Yap; Jarvin E. Nipales; Jo-Hannah S. Lames; John Michael Egana; John Q. Wong; Johnny A. Ong; Joshua Gregor A. Dizon; Joshua Jose Endozo; Karol Sophia Agape R. Padilla; Kris P. Punayan; Kristina Patriz Dela Cruz; Lindsay Clare D.L. Carandang; Ma. Exanil Plantig; Marc Edsel C. Ayes; Maria Rosario Singh-Vergeire; Maria Sofia L. Yangzon; Marielle M. Gamboa; Marissa Alejandria; Niña Francesca Bustamante; Razel Nikka M. Hao; Renato Jacinto Q. Mantaring; Rianna Patricia S. Cruz; Razel A. Medina; Shiela Mae M. Araiza; Yvonne Valerie Austria; Zipporah Mariebelle R. Enriquez; Zyrel V. Mollejo |
| EPI_ISL_8975081,<br>EPI_ISL_8826430                                                                                                                                                                                                                                                                                                                                                                                                                                                                                                                                                                                                                                                                                                                                                                                                                                                                                                                                                                                                                                         | Lancet<br>Lancet Laboratories Gaborone                                                                                                                                                                    | NHLS/UCT<br>Botswana Harvard HIV Reference Laboratory<br>Arash Iranzadeh; Bruna Galva; Carolyn Williams; Deelan Doolabh; Diana Harold; Gert Marais; Innocent Mudau; Luicer Olubayo; Lynn Tyers; Marvin Hsiao; Nokuzela Mbhele; Rageema Joseph; Stephen Korsman<br>Boitumelo Zuze; Botshelo Radibe; Dorcas Maruapula; Ellen Nkitse; Joseph Makhera; Keoratlhe Ntshambiwa; Kgomotso Moruši; Legodile Koepelle; Levy Ncube; Mosana Moyo; Mosepele Mosepele; Mphaphi B. Mbulawa; Ontlametse T. Bareng; Pamela Smith-Lawrence; Roger Shapiro; Seftogoti Ramaolaga; Shahin Lockman; Sikhulile Moyo; Simani Gasetiswe; Thongtholo Mphoyakgosi; Wonderfull T. Choga                                                                                                                                                                                                                                                                                                                                                              |
| EPI_ISL_9423054,<br>EPI_ISL_9423085,<br>EPI_ISL_9423093,<br>EPI_ISL_9423097                                                                                                                                                                                                                                                                                                                                                                                                                                                                                                                                                                                                                                                                                                                                                                                                                                                                                                                                                                                                 | Lancet Laboratoy                                                                                                                                                                                          | CERI, Centre for Epidemic Response and Innovation, Stellenbosch University and KRISP, KZN Research Innovation and Sequencing Platform, UKZN<br>Anyaneji UJ; Giandhari J; Maharaj A; Moir M; Naicker D; Naidoo Y; Pillay S; San JE; Tegally H; Tshibulula D; Van Wyk S; Wilkinson E; de Oliveira T                                                                                                                                                                                                                                                                                                                                                                                                                                                                                                                                                                                                                                                                                                                        |
| EPI_ISL_8441657,<br>EPI_ISL_8452207                                                                                                                                                                                                                                                                                                                                                                                                                                                                                                                                                                                                                                                                                                                                                                                                                                                                                                                                                                                                                                         | Lighthouse Lab in Alderley Park                                                                                                                                                                           | Wellcome Sanger Institute for the COVID-19 Genomics UK (COG-UK) Consortium<br>Cordelia Langford; David K. Jackson; Dominic Kwiatkowski; Ewan Harrison; Ian Johnston; Jacquelyn Wynn; Jeffrey Barrett; John Sillitoe on behalf of the Wellcome Sanger Institute COVID-19 Surveillance Team; Mairead Hyland; Roberto Amato; Sonia Gonçalves; The Lighthouse Lab in Alderley Park and Alex Alderton                                                                                                                                                                                                                                                                                                                                                                                                                                                                                                                                                                                                                         |
| EPI_ISL_8340557,                                                                                                                                                                                                                                                                                                                                                                                                                                                                                                                                                                                                                                                                                                                                                                                                                                                                                                                                                                                                                                                            | Lighthouse Lab in Glasgow                                                                                                                                                                                 | Wellcome Sanger Institute for the COVID-19 Genomics<br>Anna Dominiczak and Alex Alderton; Carol Clugston; Cordelia Langford; David Gray; David K. Jackson; Dominic Kwiatkowski; Ewan Harrison; Harper VanSteenhouse; Ian Johnston; Jeffrey Barrett; John Sillitoe on behalf of the Wellcome Sanger Institute COVID-19 Surveillance                                                                                                                                                                                                                                                                                                                                                                                                                                                                                                                                                                                                                                                                                       |

|                                                                                                                                                                                                                                                                                                                                                                                                                                                                                                                                                                                                                                                                      |                                                                                                            |                                                                                                                                              |                                                                                                                                                                                                                                                                                                                                                                                                                                                                                                                                                                                                                                                                                                                                                                                                                                                                                                                                                                                                 |                                                                                                                                                                                                                                                                                                                                                                                                                                                                                                                                                                                                                                                                                                                                                                                                                                                                                                                                                                                                 |
|----------------------------------------------------------------------------------------------------------------------------------------------------------------------------------------------------------------------------------------------------------------------------------------------------------------------------------------------------------------------------------------------------------------------------------------------------------------------------------------------------------------------------------------------------------------------------------------------------------------------------------------------------------------------|------------------------------------------------------------------------------------------------------------|----------------------------------------------------------------------------------------------------------------------------------------------|-------------------------------------------------------------------------------------------------------------------------------------------------------------------------------------------------------------------------------------------------------------------------------------------------------------------------------------------------------------------------------------------------------------------------------------------------------------------------------------------------------------------------------------------------------------------------------------------------------------------------------------------------------------------------------------------------------------------------------------------------------------------------------------------------------------------------------------------------------------------------------------------------------------------------------------------------------------------------------------------------|-------------------------------------------------------------------------------------------------------------------------------------------------------------------------------------------------------------------------------------------------------------------------------------------------------------------------------------------------------------------------------------------------------------------------------------------------------------------------------------------------------------------------------------------------------------------------------------------------------------------------------------------------------------------------------------------------------------------------------------------------------------------------------------------------------------------------------------------------------------------------------------------------------------------------------------------------------------------------------------------------|
| EPI_ISL_8495612,<br>EPI_ISL_8498516                                                                                                                                                                                                                                                                                                                                                                                                                                                                                                                                                                                                                                  | UK (COG-UK) Consortium                                                                                     |                                                                                                                                              | Team; Roberto Amato; Sonia Goncalves; Yumi Kasai                                                                                                                                                                                                                                                                                                                                                                                                                                                                                                                                                                                                                                                                                                                                                                                                                                                                                                                                                |                                                                                                                                                                                                                                                                                                                                                                                                                                                                                                                                                                                                                                                                                                                                                                                                                                                                                                                                                                                                 |
| EPI_ISL_7580387, EPI_ISL_7718520, EPI_ISL_8277562, EPI_ISL_8277586, EPI_ISL_8340464, EPI_ISL_8341954, EPI_ISL_8500543, EPI_ISL_8521353, EPI_ISL_8536660, EPI_ISL_8536763                                                                                                                                                                                                                                                                                                                                                                                                                                                                                             | Lighthouse Lab in Milton Keynes                                                                            | Wellcome Sanger Institute for the COVID-19 Genomics UK (COG-UK) Consortium                                                                   | Cordelia Langford; David K. Jackson; Dominic Kwiatkowski; Ewan Harrison; Ian Johnston; Jeffrey Barrett; John Sillitoe on behalf of the Wellcome Sanger Institute COVID-19 Surveillance Team; Roberto Amato; Sonia Goncalves; The Lighthouse Lab in Milton Keynes and Alex Alderton                                                                                                                                                                                                                                                                                                                                                                                                                                                                                                                                                                                                                                                                                                              |                                                                                                                                                                                                                                                                                                                                                                                                                                                                                                                                                                                                                                                                                                                                                                                                                                                                                                                                                                                                 |
| EPI_ISL_9321580, EPI_ISL_9321583, EPI_ISL_9321584, EPI_ISL_9321588, EPI_ISL_9321590, EPI_ISL_9321593, EPI_ISL_9321595, EPI_ISL_9321597, EPI_ISL_9321599, EPI_ISL_9321602, EPI_ISL_9321604, EPI_ISL_9321607, EPI_ISL_9321609, EPI_ISL_9321612, EPI_ISL_9321617, EPI_ISL_9321619, EPI_ISL_9321622, EPI_ISL_9321716, EPI_ISL_9321718, EPI_ISL_9321720, EPI_ISL_9321723, EPI_ISL_9321728, EPI_ISL_9321730, EPI_ISL_9321733, EPI_ISL_9321736, EPI_ISL_9321738, EPI_ISL_9321740, EPI_ISL_9321787, EPI_ISL_9324425, EPI_ISL_9324426                                                                                                                                         | Lung Center Of The Philippines (LCP)                                                                       | Philippine Genome Center                                                                                                                     | Alethea R. de Guzman; Alyssa Joyce E. Telles; Angelica A. Garcia; Anna Ong-Lim; Benedict A. Maralit; Carlo M. Lapid; Celia Carlos; Cynthia P. Saloma; Devon Ray Pacial; Diomedes A. Cariño; Edsel Maurice Salvana; El King D. Morado; Elcid Aaron R. Pangilinan; Eva Maria Cutiongco-de la Paz; Francis A. Tablizo; Henrietta Marie Rodriguez; Jaime C. Montoya; Jan Michael C. Yap; Jarvin E. Nipales; Jo-Hannah S. Llamas; John Michael Egana; John Q. Wong; Johnny A. Ong; Joshua Gregor A. Dizon; Joshua Jose Endozo; Karol Sophia Agape R. Padilla; Kris P. Punayan; Kristina Patriz Dela Cruz; Lindsay Clare D.L. Carandang; Ma. Exanil Plantig; Marc Edsel C. Ayes; Maria Rosario Singh-Vergeire; Maria Sofia L. Yangzon; Marielle M. Gamboa; Marissa Alejandria; Niña Francesca Bustamante; Razel Nikka M. Hao; Renato Jacinto Q. Mantaring; Rianna Patricia S. Cruz; Rizel A. Medina; Shiela Mae M. Araiza; Yvonne Valerie Austria; Zipporah Mariebelle R. Enriquez; Zryel V. Mollejon |                                                                                                                                                                                                                                                                                                                                                                                                                                                                                                                                                                                                                                                                                                                                                                                                                                                                                                                                                                                                 |
| EPI_ISL_8769863, EPI_ISL_8769868, EPI_ISL_8769869, EPI_ISL_8769872, EPI_ISL_8769874, EPI_ISL_8769876, EPI_ISL_8769877, EPI_ISL_8769879, EPI_ISL_8769881, EPI_ISL_8769884, EPI_ISL_8769886, EPI_ISL_8769893, EPI_ISL_8769894, EPI_ISL_8769895, EPI_ISL_8769896, EPI_ISL_8769897, EPI_ISL_8769899, EPI_ISL_8769900, EPI_ISL_8769902, EPI_ISL_8769906, EPI_ISL_8769907, EPI_ISL_8769908, EPI_ISL_8769910, EPI_ISL_8769911, EPI_ISL_8769913, EPI_ISL_8769914, EPI_ISL_8769915, EPI_ISL_8769919, EPI_ISL_8769920, EPI_ISL_8769923, EPI_ISL_8769924, EPI_ISL_8769925                                                                                                       | see above                                                                                                  | MAHAJAN IMAGING<br>MANIPAL HOSPITAL                                                                                                          | ILBS<br>ILBS                                                                                                                                                                                                                                                                                                                                                                                                                                                                                                                                                                                                                                                                                                                                                                                                                                                                                                                                                                                    | Arjun Bhugra; Chhagan Bihari Sharma; Ekta Gupta; Pramod Gautam; Rahul Garg; Reshu Agarwal; Shiv Kumar Sarin; Urvinder Kaur; Varun Suroliya<br>Arjun Bhugra; Chhagan Bihari Sharma; Ekta Gupta; Pramod Gautam; Rahul Garg; Reshu Agarwal; Shiv Kumar Sarin; Urvinder Kaur; Varun Suroliya                                                                                                                                                                                                                                                                                                                                                                                                                                                                                                                                                                                                                                                                                                        |
| EPI_ISL_9177593,<br>EPI_ISL_9177614                                                                                                                                                                                                                                                                                                                                                                                                                                                                                                                                                                                                                                  | MARINDUQUE PROVINCIAL HEALTH OFFICE                                                                        | Research Institute for Tropical Medicine                                                                                                     | Alexander Sadiasa; Anne Pauline A. Alpino; Ardiane Ysabelle M. Dolor; Catalino S. Demetria; Criselda T. Bautista; Francisco Gerardo M. Polotan; Jefferson Earl J. Halog; Joseph Hughes; Kirstyn Brunker; Lei Lanna M. Dancel; Ma. Angelica A. Tujan; Mayan Uy-Lumandas; Othoniel Jan T. Onza; Simon Daldry; Timothy John R. Dizon; Vina Lea F. Arguelles; Yao-Tsun Li                                                                                                                                                                                                                                                                                                                                                                                                                                                                                                                                                                                                                           |                                                                                                                                                                                                                                                                                                                                                                                                                                                                                                                                                                                                                                                                                                                                                                                                                                                                                                                                                                                                 |
| EPI_ISL_9375636                                                                                                                                                                                                                                                                                                                                                                                                                                                                                                                                                                                                                                                      | MATA CHANAN DEVI HOSPITAL                                                                                  | ILBS                                                                                                                                         | Amit Pandey; Arjun Bhugra; Chhagan Bihari Sharma; Ekta Gupta; Pramod Gautam; Priya Singh; Reshu Agarwal; Shiv Kumar Sarin; Urvinder Kaur; Varun Suroliya                                                                                                                                                                                                                                                                                                                                                                                                                                                                                                                                                                                                                                                                                                                                                                                                                                        |                                                                                                                                                                                                                                                                                                                                                                                                                                                                                                                                                                                                                                                                                                                                                                                                                                                                                                                                                                                                 |
| EPI_ISL_9374558, EPI_ISL_9375620, EPI_ISL_9375623, EPI_ISL_9375626, EPI_ISL_9375635, EPI_ISL_9375643, EPI_ISL_9375646, EPI_ISL_9375649                                                                                                                                                                                                                                                                                                                                                                                                                                                                                                                               | see above                                                                                                  | MAX HOSPITAL                                                                                                                                 | ILBS                                                                                                                                                                                                                                                                                                                                                                                                                                                                                                                                                                                                                                                                                                                                                                                                                                                                                                                                                                                            | Amit Pandey; Arjun Bhugra; Chhagan Bihari Sharma; Ekta Gupta; Pramod Gautam; Priya Singh; Reshu Agarwal; Shiv Kumar Sarin; Urvinder Kaur; Varun Suroliya                                                                                                                                                                                                                                                                                                                                                                                                                                                                                                                                                                                                                                                                                                                                                                                                                                        |
| EPI_ISL_8248645,<br>EPI_ISL_8248849,<br>EPI_ISL_8411859,<br>EPI_ISL_8680850                                                                                                                                                                                                                                                                                                                                                                                                                                                                                                                                                                                          | MDI Limbach Berlin GmbH; MVZ Labor Berlin                                                                  | Robert Koch Institute                                                                                                                        |                                                                                                                                                                                                                                                                                                                                                                                                                                                                                                                                                                                                                                                                                                                                                                                                                                                                                                                                                                                                 |                                                                                                                                                                                                                                                                                                                                                                                                                                                                                                                                                                                                                                                                                                                                                                                                                                                                                                                                                                                                 |
| EPI_ISL_9796145                                                                                                                                                                                                                                                                                                                                                                                                                                                                                                                                                                                                                                                      | MEDILAB GROUP                                                                                              | CNR Virus des Infections Respiratoires - France SUD                                                                                          |                                                                                                                                                                                                                                                                                                                                                                                                                                                                                                                                                                                                                                                                                                                                                                                                                                                                                                                                                                                                 | Antonin Bai; Bruno Lina; Bruno Simon; Gregory Destras; Gwendolynne Burfin; Hadrien Regue; Laurence Josset; Martine Valette; Quentin Semanas; Theophile Boyer                                                                                                                                                                                                                                                                                                                                                                                                                                                                                                                                                                                                                                                                                                                                                                                                                                    |
| EPI_ISL_8769804,<br>EPI_ISL_8769805                                                                                                                                                                                                                                                                                                                                                                                                                                                                                                                                                                                                                                  | MEDTECH LAB                                                                                                | ILBS                                                                                                                                         |                                                                                                                                                                                                                                                                                                                                                                                                                                                                                                                                                                                                                                                                                                                                                                                                                                                                                                                                                                                                 | Arjun Bhugra; Chhagan Bihari Sharma; Ekta Gupta; Pramod Gautam; Rahul Garg; Reshu Agarwal; Shiv Kumar Sarin; Urvinder Kaur; Varun Suroliya                                                                                                                                                                                                                                                                                                                                                                                                                                                                                                                                                                                                                                                                                                                                                                                                                                                      |
| EPI_ISL_9092106,<br>EPI_ISL_9092107                                                                                                                                                                                                                                                                                                                                                                                                                                                                                                                                                                                                                                  | MOLECULAR SOLUTIONS CARE HEALTH LLP BANGALORE                                                              | National Center for Biological Sciences, TIFR - Rockefeller Foundation                                                                       |                                                                                                                                                                                                                                                                                                                                                                                                                                                                                                                                                                                                                                                                                                                                                                                                                                                                                                                                                                                                 | Awadhesh Pandit; Bhagyashree Madhav Shelar; Darshan Sreenivas; Dimple Notani; Kathirvel Kandasamy; Lakshminarayan CP; Satyajit Mayor; Uma Ramakrishnan                                                                                                                                                                                                                                                                                                                                                                                                                                                                                                                                                                                                                                                                                                                                                                                                                                          |
| EPI_ISL_9510137                                                                                                                                                                                                                                                                                                                                                                                                                                                                                                                                                                                                                                                      | MS Palya PHC                                                                                               | inStem, NCBS-INSACOG                                                                                                                         |                                                                                                                                                                                                                                                                                                                                                                                                                                                                                                                                                                                                                                                                                                                                                                                                                                                                                                                                                                                                 | Aswin SaiNarain; Dasaradhi Palakodeti; Uma Ramakrishnan                                                                                                                                                                                                                                                                                                                                                                                                                                                                                                                                                                                                                                                                                                                                                                                                                                                                                                                                         |
| EPI_ISL_8414381                                                                                                                                                                                                                                                                                                                                                                                                                                                                                                                                                                                                                                                      | MVZ Labor Dr. Fenner und Kollegen (Standort Hamburg)                                                       | Robert Koch Institute                                                                                                                        |                                                                                                                                                                                                                                                                                                                                                                                                                                                                                                                                                                                                                                                                                                                                                                                                                                                                                                                                                                                                 |                                                                                                                                                                                                                                                                                                                                                                                                                                                                                                                                                                                                                                                                                                                                                                                                                                                                                                                                                                                                 |
| EPI_ISL_8669342,<br>EPI_ISL_8669385,<br>EPI_ISL_8680768,<br>EPI_ISL_8682440                                                                                                                                                                                                                                                                                                                                                                                                                                                                                                                                                                                          | MVZ Labor Dr. Limbach & Kollegen GbR                                                                       | Robert Koch Institute                                                                                                                        |                                                                                                                                                                                                                                                                                                                                                                                                                                                                                                                                                                                                                                                                                                                                                                                                                                                                                                                                                                                                 |                                                                                                                                                                                                                                                                                                                                                                                                                                                                                                                                                                                                                                                                                                                                                                                                                                                                                                                                                                                                 |
| EPI_ISL_8569231                                                                                                                                                                                                                                                                                                                                                                                                                                                                                                                                                                                                                                                      | Malawi Liverpool Wellcome Trust Clinical Research Program                                                  | Malawi Liverpool Wellcome Trust Clinical Research Program                                                                                    |                                                                                                                                                                                                                                                                                                                                                                                                                                                                                                                                                                                                                                                                                                                                                                                                                                                                                                                                                                                                 | Belson Kutambe; Ben Morton; Catherine Ancombe; Kondwani Jambo; Mavis Menyere; Philip Ashton; Sam Lissauer                                                                                                                                                                                                                                                                                                                                                                                                                                                                                                                                                                                                                                                                                                                                                                                                                                                                                       |
| EPI_ISL_9322852, EPI_ISL_9322853, EPI_ISL_9322854, EPI_ISL_9322855, EPI_ISL_9322856, EPI_ISL_9322857, EPI_ISL_9322858, EPI_ISL_9322860, EPI_ISL_9322861                                                                                                                                                                                                                                                                                                                                                                                                                                                                                                              | see above                                                                                                  | Mariano Marcos Memorial Hospital And Medical Center                                                                                          | Philippine Genome Center                                                                                                                                                                                                                                                                                                                                                                                                                                                                                                                                                                                                                                                                                                                                                                                                                                                                                                                                                                        | Alethea R. de Guzman; Alyssa Joyce E. Telles; Angelica A. Garcia; Anna Ong-Lim; Benedict A. Maralit; Carlo M. Lapid; Celia Carlos; Cynthia P. Saloma; Devon Ray Pacial; Diomedes A. Cariño; Edsel Maurice Salvana; El King D. Morado; Elcid Aaron R. Pangilinan; Eva Maria Cutiongco-de la Paz; Francis A. Tablizo; Henrietta Marie Rodriguez; Jaime C. Montoya; Jan Michael C. Yap; Jarvin E. Nipales; Jo-Hannah S. Llamas; John Michael Egana; John Q. Wong; Johnny A. Ong; Joshua Gregor A. Dizon; Joshua Jose Endozo; Karol Sophia Agape R. Padilla; Kris P. Punayan; Kristina Patriz Dela Cruz; Lindsay Clare D.L. Carandang; Ma. Exanil Plantig; Marc Edsel C. Ayes; Maria Rosario Singh-Vergeire; Maria Sofia L. Yangzon; Marielle M. Gamboa; Marissa Alejandria; Niña Francesca Bustamante; Razel Nikka M. Hao; Renato Jacinto Q. Mantaring; Rianna Patricia S. Cruz; Rizel A. Medina; Shiela Mae M. Araiza; Yvonne Valerie Austria; Zipporah Mariebelle R. Enriquez; Zryel V. Mollejon |
| EPI_ISL_8769741                                                                                                                                                                                                                                                                                                                                                                                                                                                                                                                                                                                                                                                      | Medibird Diagnostics                                                                                       | ILBS                                                                                                                                         |                                                                                                                                                                                                                                                                                                                                                                                                                                                                                                                                                                                                                                                                                                                                                                                                                                                                                                                                                                                                 | Arjun Bhugra; Chhagan Bihari Sharma; Ekta Gupta; Pramod Gautam; Rahul Garg; Reshu Agarwal; Shiv Kumar Sarin; Urvinder Kaur; Varun Suroliya                                                                                                                                                                                                                                                                                                                                                                                                                                                                                                                                                                                                                                                                                                                                                                                                                                                      |
| EPI_ISL_8928084,<br>EPI_ISL_9227200                                                                                                                                                                                                                                                                                                                                                                                                                                                                                                                                                                                                                                  | Medical Microbiology Unit, Department for Laboratory Medicine, Drammen Hospital, Vestre Viken Health Trust | Norwegian Institute of Public Health, Department of Virology                                                                                 |                                                                                                                                                                                                                                                                                                                                                                                                                                                                                                                                                                                                                                                                                                                                                                                                                                                                                                                                                                                                 | Atiya R Ali; Debech Nadia; Engebretsen Serina Beate; Garcia Llorente Ignacio; Hilde Elshaug; Hilde Nordby Falkenhau; Hilde Vollan; Jon Bråte; Kamilla Heddeland Instefjord; Karoline Bragstad; Kathrine Stene-Johansen; Line Victoria Moen; Marie Paulsen Madsen; Olav Hungnes; Pedersen Benedikte Nevjen; Rasmus Riis Kopperud                                                                                                                                                                                                                                                                                                                                                                                                                                                                                                                                                                                                                                                                 |
| EPI_ISL_8641944,<br>EPI_ISL_8643473                                                                                                                                                                                                                                                                                                                                                                                                                                                                                                                                                                                                                                  | Microbiological Diagnostic Unit - Public Health Laboratory (MDU-PHL)                                       | Microbiological Diagnostic Unit - Public Health Laboratory (MDU-PHL)                                                                         |                                                                                                                                                                                                                                                                                                                                                                                                                                                                                                                                                                                                                                                                                                                                                                                                                                                                                                                                                                                                 | Horan, K.; N.L.; Seemann, T.; Sherry                                                                                                                                                                                                                                                                                                                                                                                                                                                                                                                                                                                                                                                                                                                                                                                                                                                                                                                                                            |
| EPI_ISL_9028453, EPI_ISL_9028454, EPI_ISL_9028455, EPI_ISL_9028456, EPI_ISL_9028457, EPI_ISL_9028458, EPI_ISL_9028459, EPI_ISL_9028460, EPI_ISL_9028461, EPI_ISL_9028462, EPI_ISL_9028463, EPI_ISL_9028464, EPI_ISL_9028465, EPI_ISL_9028466, EPI_ISL_9028467, EPI_ISL_9028468, EPI_ISL_9028469, EPI_ISL_9028470, EPI_ISL_9028471, EPI_ISL_9028472, EPI_ISL_9028473, EPI_ISL_9028474, EPI_ISL_9028475, EPI_ISL_9028477, EPI_ISL_9028478, EPI_ISL_9028481, EPI_ISL_9028482, EPI_ISL_9028483, EPI_ISL_9028484, EPI_ISL_9028485, EPI_ISL_9028486, EPI_ISL_9028487, EPI_ISL_9028488, EPI_ISL_9028489, EPI_ISL_9028491, EPI_ISL_9028492, EPI_ISL_9028493, EPI_ISL_9028623 | see above                                                                                                  | Ministry of Public Health / Hamad Medical Corporation                                                                                        | Biomedical Research Center (BRC), Qatar University / Qatar Genome Project (QGP)                                                                                                                                                                                                                                                                                                                                                                                                                                                                                                                                                                                                                                                                                                                                                                                                                                                                                                                 | Asmaa A. Al-Thani; MOPH and HMC: Abdullahif Al-Khatib; BRC: Heba A. Al-Khatib; Chadi Saad; Dana Al-Batsh; Dina Elgakhlab. QGP: Fatima H. Al-Kuwari; Einas A. E. Al-Kuwari; Fatima M. Benslimane; Fatma Hassan Ali; Hadeel T. Mohammed; Hadi M. Yassine; Hamad E. Al-Romaihi; Hamda Alromaihi; Maria K. Smatti; Mashaal A. Al-Bader; Mohammed Al-Thani; Muna A. S. Al-Maslamani; Ola Al-Jama; Peter V. Coyle; Rehama A. El-Kahlout. QBB: Tasneem Al-Hamad; Roberto Bertolini; Salih Al-Marri; Swapna Thomas                                                                                                                                                                                                                                                                                                                                                                                                                                                                                      |
| EPI_ISL_8053967, EPI_ISL_8346039, EPI_ISL_8347246, EPI_ISL_8347729, EPI_ISL_8381472, EPI_ISL_8381474, EPI_ISL_8382164, EPI_ISL_8382417, EPI_ISL_8382500, EPI_ISL_8382567, EPI_ISL_8465078, EPI_ISL_8465086, EPI_ISL_8465460, EPI_ISL_8529641, EPI_ISL_9006264, EPI_ISL_9006325, EPI_ISL_9007655, EPI_ISL_9007691, EPI_ISL_9007999, EPI_ISL_9008095, EPI_ISL_9009567, EPI_ISL_9010495, EPI_ISL_9010933                                                                                                                                                                                                                                                                | see above                                                                                                  | Molekylær Medicinsk Afdeling, Aarhus University Hospital, Aarhus, Denmark                                                                    | Statens Serum Institut Bioinformatics and Microbial Genomics                                                                                                                                                                                                                                                                                                                                                                                                                                                                                                                                                                                                                                                                                                                                                                                                                                                                                                                                    | Danish Covid-19 Genome Consortium                                                                                                                                                                                                                                                                                                                                                                                                                                                                                                                                                                                                                                                                                                                                                                                                                                                                                                                                                               |
| EPI_ISL_8497543                                                                                                                                                                                                                                                                                                                                                                                                                                                                                                                                                                                                                                                      | NHL Medical College, Ahmedabad                                                                             | Gujarat Biotechnology Research Centre                                                                                                        |                                                                                                                                                                                                                                                                                                                                                                                                                                                                                                                                                                                                                                                                                                                                                                                                                                                                                                                                                                                                 | Akhilesh Modi; Apurvasinh Puvar; Bhadrashinh Gohil; Chaitanya Joshi; Disha Vora; Janvi Raval; Jaykumar Rangani; Jaysri Pethani; Madhvi Joshi; Nimesh Patel; Nitin Savaliya; Nitin Shukla; Priyank Chavda; Ramesh Pandit; Roshani Mishra; Sonal Sharma; Tasnim Trivedi; Zarna Pate                                                                                                                                                                                                                                                                                                                                                                                                                                                                                                                                                                                                                                                                                                               |
| EPI_ISL_9023162                                                                                                                                                                                                                                                                                                                                                                                                                                                                                                                                                                                                                                                      | NHL Municipal Medical College, Ahmedabad (SVP)                                                             | Gujarat Biotechnology Research Centre                                                                                                        |                                                                                                                                                                                                                                                                                                                                                                                                                                                                                                                                                                                                                                                                                                                                                                                                                                                                                                                                                                                                 | Akhilesh Modi; Apurvasinh Puvar; Bhadrashinh Gohil; Chaitanya Joshi; Disha Vora; Janvi Raval; Jaykumar Rangani; Jaysri Pethani; Madhvi Joshi; Nimesh Patel; Nitin Savaliya; Nitin Shukla; Priyank Chavda; Ramesh Pandit; Roshani Mishra; Sonal Sharma; Tasnim Trivedi; Zarna Pate                                                                                                                                                                                                                                                                                                                                                                                                                                                                                                                                                                                                                                                                                                               |
| EPI_ISL_9686845,<br>EPI_ISL_9686873,<br>EPI_ISL_9686874,<br>EPI_ISL_9686877                                                                                                                                                                                                                                                                                                                                                                                                                                                                                                                                                                                          | NHLS Port Elizabeth Laboratory                                                                             | CERI, Centre for Epidemic Response and Innovation, Stellenbosch University and KRISP, KZN Research Innovation and Sequencing Platform, UKZN. |                                                                                                                                                                                                                                                                                                                                                                                                                                                                                                                                                                                                                                                                                                                                                                                                                                                                                                                                                                                                 | Anyaneji UJ; Ghandhari J; Maharaj A; Moir M; Naicker D; Naidoo Y; Nokukhanya Mdlalose; Oluwakemi Laguda-Akingba; Pillay S; San JE; Tegally H; Tshiabula D; Van Wyk S; Wilkinson E; de Oliveira T                                                                                                                                                                                                                                                                                                                                                                                                                                                                                                                                                                                                                                                                                                                                                                                                |
| EPI_ISL_8890534,<br>EPI_ISL_8890544,<br>EPI_ISL_8890545,<br>EPI_ISL_8890551                                                                                                                                                                                                                                                                                                                                                                                                                                                                                                                                                                                          | NHLS Universitas Academic                                                                                  | UFS Virology                                                                                                                                 |                                                                                                                                                                                                                                                                                                                                                                                                                                                                                                                                                                                                                                                                                                                                                                                                                                                                                                                                                                                                 | D Goedhals; Emmanuel Ogunbayo; MM Nyaga; MT Mogotsi; P Nthiga; PA Bester; T de Oliveira                                                                                                                                                                                                                                                                                                                                                                                                                                                                                                                                                                                                                                                                                                                                                                                                                                                                                                         |
| EPI_ISL_8166539, EPI_ISL_8166550, EPI_ISL_8166584, EPI_ISL_8166589, EPI_ISL_8166600, EPI_ISL_8565016, EPI_ISL_8565017, EPI_ISL_8565018                                                                                                                                                                                                                                                                                                                                                                                                                                                                                                                               | see above                                                                                                  | NRL, DR LAL PATH LAB LTD                                                                                                                     | ILBS                                                                                                                                                                                                                                                                                                                                                                                                                                                                                                                                                                                                                                                                                                                                                                                                                                                                                                                                                                                            | Arjun Bhugra; Chhagan Bihari Sharma; Ekta Gupta; Pramod Gautam; Rahul Garg; Reshu Agarwal; Shiv Kumar Sarin; Urvinder Kaur; Varun Suroliya                                                                                                                                                                                                                                                                                                                                                                                                                                                                                                                                                                                                                                                                                                                                                                                                                                                      |
| EPI_ISL_8769713,<br>EPI_ISL_8769771,<br>EPI_ISL_8769775                                                                                                                                                                                                                                                                                                                                                                                                                                                                                                                                                                                                              | NRL, Dr Lal Path Lab Ltds                                                                                  | ILBS                                                                                                                                         |                                                                                                                                                                                                                                                                                                                                                                                                                                                                                                                                                                                                                                                                                                                                                                                                                                                                                                                                                                                                 | Arjun Bhugra; Chhagan Bihari Sharma; Ekta Gupta; Pramod Gautam; Rahul Garg; Reshu Agarwal; Shiv Kumar Sarin; Urvinder Kaur; Varun Suroliya                                                                                                                                                                                                                                                                                                                                                                                                                                                                                                                                                                                                                                                                                                                                                                                                                                                      |
| EPI_ISL_8830283                                                                                                                                                                                                                                                                                                                                                                                                                                                                                                                                                                                                                                                      | National Centre For Cell Science                                                                           | National Centre For Cell Science - INSACOG                                                                                                   |                                                                                                                                                                                                                                                                                                                                                                                                                                                                                                                                                                                                                                                                                                                                                                                                                                                                                                                                                                                                 | Ajay Pillai; Avinash K Kshirsagar; Dhiraj Dhotre; Girish R Nair; Harshida S Ghode; INSACOG Consortium team; Kartik J Deopujari; Manoj Kumar Bhat; Yogesh Shouche                                                                                                                                                                                                                                                                                                                                                                                                                                                                                                                                                                                                                                                                                                                                                                                                                                |
| EPI_ISL_8637951, EPI_ISL_8637958, EPI_ISL_8637971, EPI_ISL_8826453, EPI_ISL_8826454, EPI_ISL_9002819, EPI_ISL_9002842, EPI_ISL_9002850                                                                                                                                                                                                                                                                                                                                                                                                                                                                                                                               | see above                                                                                                  | National Health Laboratory                                                                                                                   | Botswana Harvard HIV Reference Laboratory                                                                                                                                                                                                                                                                                                                                                                                                                                                                                                                                                                                                                                                                                                                                                                                                                                                                                                                                                       | Boitumelo J. L Zuze; Boitumelo Zuze; Botshelo Radibe; Dorcas Maruapula; Joseph Makhema; Keoratlhe Ntshambwa; Kgomotso Moruisi; Legodile Kooepile; Letsibogo Gaoraelwe; Mosepele Mosepele; Mphaphi B. Mbulawa; Ontlametse T. Bareng; Pamela Smith-Lawrence; Roger Shapiro; Setefoto Ramaloga; Shahin Lockman; Sikhulle Moyo; Simani Gaseitswe; Thela Tefelo; Tongthobho Mphoyakgosi; Wonderful T. Choga                                                                                                                                                                                                                                                                                                                                                                                                                                                                                                                                                                                          |
| EPI_ISL_9328096,<br>EPI_ISL_9328105,<br>EPI_ISL_9328106,<br>EPI_ISL_9328136                                                                                                                                                                                                                                                                                                                                                                                                                                                                                                                                                                                          | National Health Laboratory Service, KwaZulu-Natal, South Africa                                            | CERI, Centre for Epidemic Response and Innovation, Stellenbosch University and KRISP, KZN Research Innovation and Sequencing Platform, UKZN. |                                                                                                                                                                                                                                                                                                                                                                                                                                                                                                                                                                                                                                                                                                                                                                                                                                                                                                                                                                                                 | Gandhari J; Maharaj A; Moir M; Naidoo Y; Nokukhanya Mdlalose; Pillay S; Ramphal U; Ramphal Y; San JE; Tegally H; Tshiabula D; Wilkinson E; de Oliveira T                                                                                                                                                                                                                                                                                                                                                                                                                                                                                                                                                                                                                                                                                                                                                                                                                                        |
| EPI_ISL_7747535, EPI_ISL_7747536, EPI_ISL_7747537, EPI_ISL_7747545, EPI_ISL_7747552, EPI_ISL_8688128, EPI_ISL_8688132, EPI_ISL_8688134, EPI_ISL_8688135, EPI_ISL_8688136, EPI_ISL_8688137, EPI_ISL_8688138, EPI_ISL_8688139, EPI_ISL_8688140, EPI_ISL_8688141, EPI_ISL_8688142, EPI_ISL_8688146, EPI_ISL_8688147, EPI_ISL_8688148, EPI_ISL_8688149, EPI_ISL_8688150, EPI_ISL_8688151, EPI_ISL_8688152, EPI_ISL_8688153, EPI_ISL_8688154, EPI_ISL_8688160, EPI_ISL_8688161, EPI_ISL_8688162                                                                                                                                                                           | see above                                                                                                  | National Health Laboratory Service, KwaZulu-Natal, South Africa                                                                              | CERI, Centre for Epidemic Response and Innovation, Stellenbosch University and KRISP, KZN Research Innovation and Sequencing Platform, UKZN.                                                                                                                                                                                                                                                                                                                                                                                                                                                                                                                                                                                                                                                                                                                                                                                                                                                    | Arisha Maharaj; Gandhari J; Moir M; Naidoo Y; Nokukhanya Mdlalose; Pillay S; Ramphal U; Ramphal Y; San JE; Tegally H; Tshiabula D; Wilkinson E; de Oliveira T; van Wyk S                                                                                                                                                                                                                                                                                                                                                                                                                                                                                                                                                                                                                                                                                                                                                                                                                        |
| EPI_ISL_9325960,<br>EPI_ISL_9325972                                                                                                                                                                                                                                                                                                                                                                                                                                                                                                                                                                                                                                  | National Health Laboratory Services, Virology                                                              | CERI, Centre for Epidemic Response and Innovation, Stellenbosch University and KRISP, KZN Research                                           |                                                                                                                                                                                                                                                                                                                                                                                                                                                                                                                                                                                                                                                                                                                                                                                                                                                                                                                                                                                                 | Bharuthram A; Gandhari J; Moir M; Mtieni N; Naidoo Y; Pillay S; Ramphal U; Ramphal Y; San JE; Subramoney K; Tegally H; Treurnicht F; Tshiabula D; Wilkinson E; de Oliveira T; van Wyk S                                                                                                                                                                                                                                                                                                                                                                                                                                                                                                                                                                                                                                                                                                                                                                                                         |

|                                                                                                                                                                                                                                                                                                                                                                                                                                                                                                                              |                                                                                                                     |                                                                                                                                              |                                                                                                                                                                                                                                                                                  |                                                                                                                                                                                                                                                                                                                                                                                                                                                                                                                                                                                                                                                                                                                                                                                                                                                                                                                                                                                                                                               |
|------------------------------------------------------------------------------------------------------------------------------------------------------------------------------------------------------------------------------------------------------------------------------------------------------------------------------------------------------------------------------------------------------------------------------------------------------------------------------------------------------------------------------|---------------------------------------------------------------------------------------------------------------------|----------------------------------------------------------------------------------------------------------------------------------------------|----------------------------------------------------------------------------------------------------------------------------------------------------------------------------------------------------------------------------------------------------------------------------------|-----------------------------------------------------------------------------------------------------------------------------------------------------------------------------------------------------------------------------------------------------------------------------------------------------------------------------------------------------------------------------------------------------------------------------------------------------------------------------------------------------------------------------------------------------------------------------------------------------------------------------------------------------------------------------------------------------------------------------------------------------------------------------------------------------------------------------------------------------------------------------------------------------------------------------------------------------------------------------------------------------------------------------------------------|
| EPI_ISL_9325975<br>EPI_ISL_9325980<br>EPI_ISL_9325987                                                                                                                                                                                                                                                                                                                                                                                                                                                                        |                                                                                                                     | Innovation and Sequencing Platform, UKZN.                                                                                                    |                                                                                                                                                                                                                                                                                  |                                                                                                                                                                                                                                                                                                                                                                                                                                                                                                                                                                                                                                                                                                                                                                                                                                                                                                                                                                                                                                               |
| EPI_ISL_8688119<br>EPI_ISL_9423053<br>EPI_ISL_9423065<br>EPI_ISL_7852877                                                                                                                                                                                                                                                                                                                                                                                                                                                     | National Health Laboratory Services, Virology                                                                       | CERI, Centre for Epidemic Response and Innovation, Stellenbosch University and KRISP, KZN Research Innovation and Sequencing Platform, UKZN. | Anyaneji UJ; Arisha Maharaj; Avani Bharuthram; Florette Treurnicht; Giandhari J; Kathleen Subramoney; Maharaj A; Moir M; Naicker D; Naidoo Y; Nkhensani Mtleni; Pillay S; Ramphal U; Ramphal Y; San JE; Tegally H; Tshiabula D; Van Wyk S; Wilkinson E; de Oliveira T; van Wyk S |                                                                                                                                                                                                                                                                                                                                                                                                                                                                                                                                                                                                                                                                                                                                                                                                                                                                                                                                                                                                                                               |
| EPI_ISL_8092780, EPI_ISL_8092783, EPI_ISL_8112317, EPI_ISL_8435250, EPI_ISL_8435282, EPI_ISL_8449933, EPI_ISL_8450019, EPI_ISL_8770538                                                                                                                                                                                                                                                                                                                                                                                       | see above                                                                                                           | National Public Health Laboratory, National Centre for Infectious Diseases                                                                   |                                                                                                                                                                                                                                                                                  | Avani Bharuthram; Florette Treurnicht; Kathleen Subramoney; Nkhensani Mtleni                                                                                                                                                                                                                                                                                                                                                                                                                                                                                                                                                                                                                                                                                                                                                                                                                                                                                                                                                                  |
| EPI_ISL_9437522                                                                                                                                                                                                                                                                                                                                                                                                                                                                                                              | National Virology Reference Laboratory                                                                              | Microbial Genomic Services                                                                                                                   |                                                                                                                                                                                                                                                                                  | Haziq Momin; Nor Azian Hafneh; Zainun Zaini                                                                                                                                                                                                                                                                                                                                                                                                                                                                                                                                                                                                                                                                                                                                                                                                                                                                                                                                                                                                   |
| EPI_ISL_9091963, EPI_ISL_9091971, EPI_ISL_9091972, EPI_ISL_9091980, EPI_ISL_9092030, EPI_ISL_9092041, EPI_ISL_9092051, EPI_ISL_9092062                                                                                                                                                                                                                                                                                                                                                                                       | see above                                                                                                           | Neuberg Anand Reference Laboratory, Bengaluru                                                                                                | National Center for Biological Sciences, TIFR - Rockefeller Foundation                                                                                                                                                                                                           | Awadhesh Pandit; Bhagyashree Madhav Shelar; Darshan Sreenivas; Dimple Notani; Kathirvel Kandasamy; Lakshminarayana CP; Satyajit Mayor; Uma Ramakrishnan                                                                                                                                                                                                                                                                                                                                                                                                                                                                                                                                                                                                                                                                                                                                                                                                                                                                                       |
| EPI_ISL_8744139<br>EPI_ISL_8744141<br>EPI_ISL_8744144<br>EPI_ISL_9072524                                                                                                                                                                                                                                                                                                                                                                                                                                                     | Neuberg Supratech Reference Laboratory, Ahmedabad                                                                   | Gujarat Biotechnology Research Centre                                                                                                        |                                                                                                                                                                                                                                                                                  | Akhilesh Modi; Apurvasinh Puvar; Bhadrashsinh Gohli; Chaitanya Joshi; Disha Vora; Janvi Raval; Jaykumar Rangani; Jignesh Panchal; Madhvi Joshi; Nimesh Patel; Nitin Savaliya; Nitin Shukla; NitinShukla; Priyank Chavda; Ramesh Pandit; Roshani Mishra; Sonal Sharma; Tasnim Trivedi; Zarna Patel                                                                                                                                                                                                                                                                                                                                                                                                                                                                                                                                                                                                                                                                                                                                             |
| EPI_ISL_8247669, EPI_ISL_8880074, EPI_ISL_8880075, EPI_ISL_9643312, EPI_ISL_9643313, EPI_ISL_9643314, EPI_ISL_9643315, EPI_ISL_9643316, EPI_ISL_9643325                                                                                                                                                                                                                                                                                                                                                                      | see above                                                                                                           | Niedersächsisches Landesgesundheitsamt (NLGA)                                                                                                | Robert Koch Institute                                                                                                                                                                                                                                                            |                                                                                                                                                                                                                                                                                                                                                                                                                                                                                                                                                                                                                                                                                                                                                                                                                                                                                                                                                                                                                                               |
| EPI_ISL_8035614<br>EPI_ISL_9177615                                                                                                                                                                                                                                                                                                                                                                                                                                                                                           | North Lantau Hospital<br>Northeastern LSTC                                                                          | Hong Kong Department of Health<br>Ginkgo Bioworks Clinical Laboratory / XpressCheck                                                          |                                                                                                                                                                                                                                                                                  | Alan K.L. Tsang; Edman T.K. Lam; Ken H.L. Ng; Patricia K. L. Leung; Peter C.W. Yip; Rickjason C.W. Chan<br>Alex M. Plocik; Allison L. Hicks; Birgitte B. Simen; Brintha P. Girinathan; Bryan Cosca; Dongjuan Dai; Keith Robison                                                                                                                                                                                                                                                                                                                                                                                                                                                                                                                                                                                                                                                                                                                                                                                                               |
| EPI_ISL_8316361<br>EPI_ISL_8316364<br>EPI_ISL_8402016<br>EPI_ISL_8960504<br>EPI_ISL_8960761<br>EPI_ISL_8960790<br>EPI_ISL_9001166                                                                                                                                                                                                                                                                                                                                                                                            | Orebro University Hospital, Dept Laboratory Medicine, Clinical Microbiology                                         | Orebro University Hospital                                                                                                                   |                                                                                                                                                                                                                                                                                  | Alexander Sadias; Anne Pauline A. Alpino; Ardiane Ysabelle M. Dolor; Catalino S. Demetria; Criselda T. Bautista; Francisco Gerardo M. Polotan; Jefferson Earl J. Halog; Joseph Hughes; Kirstyn Brunker; Lei Lanna M. Dancel; Ma. Angelica A. Tujan; Mayan Uy-Lumandas; Othoniel Jan T. Onza; Simon Daldry; Timothy John R. Dixon; Vina Lea F. Arguelles; Yao-Tsun Li                                                                                                                                                                                                                                                                                                                                                                                                                                                                                                                                                                                                                                                                          |
| EPI_ISL_8744139<br>EPI_ISL_8744141<br>EPI_ISL_8744144<br>EPI_ISL_9072524                                                                                                                                                                                                                                                                                                                                                                                                                                                     | Originating lab: Wales Specialist Virology Centre Sequencing lab: Pathogen Genomics Unit                            | Public Health Wales Microbiology Cardiff Wales Specialist Virology Centre                                                                    |                                                                                                                                                                                                                                                                                  | Alec Birchley; Alexander Adams; Amy Gaskin; Angela Marchbank; Bree Gatica-Wilcox; Catherine Moore; Jason Coombes; Joanne Watkins; Joel Southgate; Johnathan Evans; Laura Gifford; Lauren Gilbert; Lee Graham; Malorie Perry; Matthew Bull; Nicole Pacchiariani; Sally Corden; Sara Kumziene-Summerhayes; Sara Rey; Sarah Taylor; Simon Cottrell; Sophie Jones; Tom Connor                                                                                                                                                                                                                                                                                                                                                                                                                                                                                                                                                                                                                                                                     |
| EPI_ISL_9681591                                                                                                                                                                                                                                                                                                                                                                                                                                                                                                              | Oslo University Hospital, Department of Microbiology                                                                | Norwegian Institute of Public Health, Department of Virology                                                                                 |                                                                                                                                                                                                                                                                                  | Arvind Yegabaram Meenakshi Sundaram; Cathrine Fladeby; Garcia Llorente Ignacio; Gregor D. Giffilan; Hilde Elshaug; Hilde Vollan; Jon Bråte; Kamilla Heddeland Instefjord; Karoline Bragstad; Kathrine Stene-Johansen; Line Victoria Moen; Lise Andresen; Mariann Nilsen; Mona Holberg-Petersen; Olav Hungnes; Pedersen Benedikte Nevjen; Pål Marius Bjørnstad; Rasmus Riis Kopperud; Teodora Plamenova Ribarska                                                                                                                                                                                                                                                                                                                                                                                                                                                                                                                                                                                                                               |
| EPI_ISL_8928077<br>EPI_ISL_9227199                                                                                                                                                                                                                                                                                                                                                                                                                                                                                           | Ostfold Hospital Trust - Kalnes, Centre for Laboratory Medicine, Section for gene technology and infection serology | Norwegian Institute of Public Health, Department of Virology                                                                                 |                                                                                                                                                                                                                                                                                  | Atiya R Ali; Debech Nadia; Engebretsen Serina Beate; Garcia Llorente Ignacio; Hilde Elshaug; Hilde Nordby Falkenhaug; Hilde Vollan; Jon Bråte; Kamilla Heddeland Instefjord; Karoline Bragstad; Kathrine Stene-Johansen; Line Victoria Moen; Marie Paulsen Madsen; Olav Hungnes; Pedersen Benedikte Nevjen; Rasmus Riis Kopperud                                                                                                                                                                                                                                                                                                                                                                                                                                                                                                                                                                                                                                                                                                              |
| EPI_ISL_8408995, EPI_ISL_8408996, EPI_ISL_8408997, EPI_ISL_8408998, EPI_ISL_8408999, EPI_ISL_8409000, EPI_ISL_8409001                                                                                                                                                                                                                                                                                                                                                                                                        | see above                                                                                                           | PASIG CITY CHILDRENS HOSPITAL                                                                                                                | Philippine Genome Center                                                                                                                                                                                                                                                         | Alethea R. de Guzman; Alyssa Joyce E. Telles; Anna Ong-Lim; Arianne A. Zamora; Benedict A. Maralit; Carlo M. Lapid; Celia Carlos; Cynthia P. Saloma; Devon Ray Pacial; Diomedes A. Cariño; Edsel Maurice Salvana; El King D. Morado; Elcid Aaron R. Pangilinan; Eva Maria Cutiongco-de la Paz; Francis A. Tablizo; Henrietta Marie Rodriguez; Jaime C. Montoya; Jan Michael C. Yap; Jarvin E. Nipales; Jo-Hannah S. Llames; John Michael Egana; John Q. Wong; Johnny A. Ong; Joshua Gregor A. Dizon; Joshua Jose Endozo; Juan Antonio R. Magalang; Karol Sophia Agape R. Padilla; Kris P. Punayan; Kristina Patriz Dela Cruz; Lindsay Clare D.L. Carandang; Ma. Exanil Planting; Marc Edsel C. Ayes; Maria Rosario Singh-Vergeire; Maria Sofia L. Yangzon; Marielle M. Gamboa; Marissa Alejandria; Niña Francesca Bustamante; Razel Nikka M. Hao; Renato Jacinto Q. Mantaring; Rianna Patricia S. Cruz; Shiela Mae M. Araiza; Yvonne Valerie Austria; Zipporah Mariebelle R. Enriquez; Zryel V. Mollejon                                      |
| EPI_ISL_7190366                                                                                                                                                                                                                                                                                                                                                                                                                                                                                                              | PHV-FSS                                                                                                             | PHV-FSS                                                                                                                                      |                                                                                                                                                                                                                                                                                  | Chenwei Wang on behalf of Q-PHIRE Genomics                                                                                                                                                                                                                                                                                                                                                                                                                                                                                                                                                                                                                                                                                                                                                                                                                                                                                                                                                                                                    |
| EPI_ISL_8408984, EPI_ISL_8408985, EPI_ISL_8408986, EPI_ISL_8408988, EPI_ISL_8408989, EPI_ISL_8408990, EPI_ISL_8408991, EPI_ISL_8408992, EPI_ISL_8408993, EPI_ISL_9320681                                                                                                                                                                                                                                                                                                                                                     | see above                                                                                                           | PNP General Hospital                                                                                                                         | Philippine Genome Center                                                                                                                                                                                                                                                         | Alethea R. de Guzman; Alyssa Joyce E. Telles; Angelica A. Garcia; Anna Ong-Lim; Arianne A. Zamora; Benedict A. Maralit; Carlo M. Lapid; Celia Carlos; Cynthia P. Saloma; Devon Ray Pacial; Diomedes A. Cariño; Edsel Maurice Salvana; El King D. Morado; Elcid Aaron R. Pangilinan; Eva Maria Cutiongco-de la Paz; Francis A. Tablizo; Henrietta Marie Rodriguez; Jaime C. Montoya; Jan Michael C. Yap; Jarvin E. Nipales; Jo-Hannah S. Llames; John Michael Egana; John Q. Wong; Johnny A. Ong; Joshua Gregor A. Dizon; Joshua Jose Endozo; Juan Antonio R. Magalang; Karol Sophia Agape R. Padilla; Kris P. Punayan; Kristina Patriz Dela Cruz; Lindsay Clare D.L. Carandang; Ma. Exanil Planting; Marc Edsel C. Ayes; Maria Rosario Singh-Vergeire; Maria Sofia L. Yangzon; Marielle M. Gamboa; Marissa Alejandria; Niña Francesca Bustamante; Razel Nikka M. Hao; Renato Jacinto Q. Mantaring; Rianna Patricia S. Cruz; Razel A. Medina; Shiela Mae M. Araiza; Yvonne Valerie Austria; Zipporah Mariebelle R. Enriquez; Zryel V. Mollejon |
| EPI_ISL_9201567                                                                                                                                                                                                                                                                                                                                                                                                                                                                                                              | POLOKWANE LABORATORY                                                                                                | National Institute for Communicable Diseases of the National Health Laboratory Service                                                       |                                                                                                                                                                                                                                                                                  | Amoako DG; Bhiman JM; Everatt J; Ismail A; Kekana D; Mahlangu B; Mnguni A; Mohale T; Ntuli N; Scheepers C; Wolter N                                                                                                                                                                                                                                                                                                                                                                                                                                                                                                                                                                                                                                                                                                                                                                                                                                                                                                                           |
| EPI_ISL_9679483<br>EPI_ISL_9679542<br>EPI_ISL_9679544<br>EPI_ISL_9679580                                                                                                                                                                                                                                                                                                                                                                                                                                                     | PORT ELIZABETH LABORATORY                                                                                           | National Institute for Communicable Diseases of the National Health Laboratory Service                                                       |                                                                                                                                                                                                                                                                                  | Amoako DG; Bhiman JM; Everatt J; Ismail A; Kekana D; Mahlangu B; Mnguni A; Mohale T; Ntuli N; Scheepers C; Wolter N                                                                                                                                                                                                                                                                                                                                                                                                                                                                                                                                                                                                                                                                                                                                                                                                                                                                                                                           |
| EPI_ISL_9320827<br>EPI_ISL_9320829<br>EPI_ISL_9320831                                                                                                                                                                                                                                                                                                                                                                                                                                                                        | PRC Subic Molecular Laboratory                                                                                      | Philippine Genome Center                                                                                                                     |                                                                                                                                                                                                                                                                                  | Alethea R. de Guzman; Alyssa Joyce E. Telles; Angelica A. Garcia; Anna Ong-Lim; Benedict A. Maralit; Carlo M. Lapid; Celia Carlos; Cynthia P. Saloma; Devon Ray Pacial; Diomedes A. Cariño; Edsel Maurice Salvana; El King D. Morado; Elcid Aaron R. Pangilinan; Eva Maria Cutiongco-de la Paz; Francis A. Tablizo; Henrietta Marie Rodriguez; Jaime C. Montoya; Jan Michael C. Yap; Jarvin E. Nipales; Jo-Hannah S. Llames; John Michael Egana; John Q. Wong; Johnny A. Ong; Joshua Gregor A. Dizon; Joshua Jose Endozo; Karol Sophia Agape R. Padilla; Kris P. Punayan; Kristina Patriz Dela Cruz; Lindsay Clare D.L. Carandang; Ma. Exanil Planting; Marc Edsel C. Ayes; Maria Rosario Singh-Vergeire; Maria Sofia L. Yangzon; Marielle M. Gamboa; Marissa Alejandria; Niña Francesca Bustamante; Razel Nikka M. Hao; Renato Jacinto Q. Mantaring; Rianna Patricia S. Cruz; Razel A. Medina; Shiela Mae M. Araiza; Yvonne Valerie Austria; Zipporah Mariebelle R. Enriquez; Zryel V. Mollejon                                              |
| EPI_ISL_8801428<br>EPI_ISL_8744127<br>EPI_ISL_8744129<br>EPI_ISL_8744207<br>EPI_ISL_8744208<br>EPI_ISL_8744211                                                                                                                                                                                                                                                                                                                                                                                                               | PRVKP FKUI<br>Pangenomics International Pvt. Ltd, Ahmedabad                                                         | National Institute of Health Research and Development<br>Gujarat Biotechnology Research Centre                                               |                                                                                                                                                                                                                                                                                  | Arie Ardiansyah Nugraha; Fajar Nur Sulistyohadi; Hana Apsari Pawestri; Hartanti Dian Ikawati; Kartika Dewi Puspa; Nelly Puspandari; Nur Ika Hariastuti; Putri Widia; Subangkit; Vivi Setiawaty<br>Akhilesh Modi; Apurvasinh Puvar; Bhadrashsinh Gohli; Chaitanya Joshi; Disha Vora; Janvi Raval; Jaykumar Rangani; Madhvi Joshi; Nimesh Patel; Nitin Savaliya; Nitin Shukla; NitinShukla; Priyank Chavda; Ramesh Pandit; Roshani Mishra; Shashi Singh; Sonal Sharma; Tasnim Trivedi; Zarna Patel                                                                                                                                                                                                                                                                                                                                                                                                                                                                                                                                              |
| EPI_ISL_9322845                                                                                                                                                                                                                                                                                                                                                                                                                                                                                                              | Parkway Medical And Diagnostic Center                                                                               | Philippine Genome Center                                                                                                                     |                                                                                                                                                                                                                                                                                  | Alethea R. de Guzman; Alyssa Joyce E. Telles; Angelica A. Garcia; Anna Ong-Lim; Benedict A. Maralit; Carlo M. Lapid; Celia Carlos; Cynthia P. Saloma; Devon Ray Pacial; Diomedes A. Cariño; Edsel Maurice Salvana; El King D. Morado; Elcid Aaron R. Pangilinan; Eva Maria Cutiongco-de la Paz; Francis A. Tablizo; Henrietta Marie Rodriguez; Jaime C. Montoya; Jan Michael C. Yap; Jarvin E. Nipales; Jo-Hannah S. Llames; John Michael Egana; John Q. Wong; Johnny A. Ong; Joshua Gregor A. Dizon; Joshua Jose Endozo; Karol Sophia Agape R. Padilla; Kris P. Punayan; Kristina Patriz Dela Cruz; Lindsay Clare D.L. Carandang; Ma. Exanil Planting; Marc Edsel C. Ayes; Maria Rosario Singh-Vergeire; Maria Sofia L. Yangzon; Marielle M. Gamboa; Marissa Alejandria; Niña Francesca Bustamante; Razel Nikka M. Hao; Renato Jacinto Q. Mantaring; Rianna Patricia S. Cruz; Razel A. Medina; Shiela Mae M. Araiza; Yvonne Valerie Austria; Zipporah Mariebelle R. Enriquez; Zryel V. Mollejon                                              |
| EPI_ISL_9322760<br>EPI_ISL_9322761<br>EPI_ISL_9322763                                                                                                                                                                                                                                                                                                                                                                                                                                                                        | Pasig City Children's Hospital                                                                                      | Philippine Genome Center                                                                                                                     |                                                                                                                                                                                                                                                                                  | Alethea R. de Guzman; Alyssa Joyce E. Telles; Angelica A. Garcia; Anna Ong-Lim; Benedict A. Maralit; Carlo M. Lapid; Celia Carlos; Cynthia P. Saloma; Devon Ray Pacial; Diomedes A. Cariño; Edsel Maurice Salvana; El King D. Morado; Elcid Aaron R. Pangilinan; Eva Maria Cutiongco-de la Paz; Francis A. Tablizo; Henrietta Marie Rodriguez; Jaime C. Montoya; Jan Michael C. Yap; Jarvin E. Nipales; Jo-Hannah S. Llames; John Michael Egana; John Q. Wong; Johnny A. Ong; Joshua Gregor A. Dizon; Joshua Jose Endozo; Karol Sophia Agape R. Padilla; Kris P. Punayan; Kristina Patriz Dela Cruz; Lindsay Clare D.L. Carandang; Ma. Exanil Planting; Marc Edsel C. Ayes; Maria Rosario Singh-Vergeire; Maria Sofia L. Yangzon; Marielle M. Gamboa; Marissa Alejandria; Niña Francesca Bustamante; Razel Nikka M. Hao; Renato Jacinto Q. Mantaring; Rianna Patricia S. Cruz; Razel A. Medina; Shiela Mae M. Araiza; Yvonne Valerie Austria; Zipporah Mariebelle R. Enriquez; Zryel V. Mollejon                                              |
| EPI_ISL_8408975, EPI_ISL_8408976, EPI_ISL_9321538, EPI_ISL_9321543, EPI_ISL_9321562, EPI_ISL_9321570, EPI_ISL_9321573, EPI_ISL_9322751, EPI_ISL_9322753, EPI_ISL_9322754, EPI_ISL_9322755, EPI_ISL_9322756, EPI_ISL_9322757, EPI_ISL_9324361, EPI_ISL_9324362, EPI_ISL_9324363, EPI_ISL_9324364, EPI_ISL_9324366, EPI_ISL_9324403, EPI_ISL_9324405, EPI_ISL_9324406, EPI_ISL_9324407, EPI_ISL_9324409, EPI_ISL_9324411, EPI_ISL_9324412, EPI_ISL_9324414                                                                     | see above                                                                                                           | Pasig City Children's Hospital - Child's Hope                                                                                                | Philippine Genome Center                                                                                                                                                                                                                                                         | Alethea R. de Guzman; Alyssa Joyce E. Telles; Angelica A. Garcia; Anna Ong-Lim; Benedict A. Maralit; Carlo M. Lapid; Celia Carlos; Cynthia P. Saloma; Devon Ray Pacial; Diomedes A. Cariño; Edsel Maurice Salvana; El King D. Morado; Elcid Aaron R. Pangilinan; Eva Maria Cutiongco-de la Paz; Francis A. Tablizo; Henrietta Marie Rodriguez; Jaime C. Montoya; Jan Michael C. Yap; Jarvin E. Nipales; Jo-Hannah S. Llames; John Michael Egana; John Q. Wong; Johnny A. Ong; Joshua Gregor A. Dizon; Joshua Jose Endozo; Karol Sophia Agape R. Padilla; Kris P. Punayan; Kristina Patriz Dela Cruz; Lindsay Clare D.L. Carandang; Ma. Exanil Planting; Marc Edsel C. Ayes; Maria Rosario Singh-Vergeire; Maria Sofia L. Yangzon; Marielle M. Gamboa; Marissa Alejandria; Niña Francesca Bustamante; Razel Nikka M. Hao; Renato Jacinto Q. Mantaring; Rianna Patricia S. Cruz; Razel A. Medina; Shiela Mae M. Araiza; Yvonne Valerie Austria; Zipporah Mariebelle R. Enriquez; Zryel V. Mollejon                                              |
| EPI_ISL_8591590<br>EPI_ISL_8744126<br>EPI_ISL_8885412<br>EPI_ISL_8885477<br>EPI_ISL_9402828<br>EPI_ISL_8745705<br>EPI_ISL_8603737<br>EPI_ISL_8603776                                                                                                                                                                                                                                                                                                                                                                         | Pasteur Institute in Ho Chi Minh city<br>Pathocare Pathology Laboratory, Vadodra                                    | Department of Microbiology and Immunology<br>Gujarat Biotechnology Research Centre                                                           |                                                                                                                                                                                                                                                                                  | Dai Vo Thi Trang; Dao Hoang Thi Nhu; Giang Thanh Dang; Hang Pham Thi Thu; Loan Kim Hoang; Manh Huy Dao; Nhung Vu Pham Hong; Quang Chan Luong; Quang Duy Pham; Thang Minh Cao; Thao Nguyen Thi Ngoc; Thinh Viet Nguyen; Thuong Vu Nguyen; Uyen Phan Thi Ngoc<br>Akhilesh Modi; Apurvasinh Puvar; Bhadrashsinh Gohli; Chaitanya Joshi; Disha Vora; Janvi Raval; Jaykumar Rangani; Madhvi Joshi; Nimesh Patel; Nitin Savaliya; Nitin Shukla; NitinShukla; Priyank Chavda; Ramesh Pandit; Roshani Mishra; Sonal Sharma; Tasnim Trivedi; Viral Patel; Zarna Patel                                                                                                                                                                                                                                                                                                                                                                                                                                                                                  |
| EPI_ISL_8745705<br>EPI_ISL_8603737<br>EPI_ISL_8603776                                                                                                                                                                                                                                                                                                                                                                                                                                                                        | Pejabat Kesihatan KLIA<br>Pejabat Kesihatan KLIA                                                                    | Malaysia Genome and Vaccine Institute<br>iPROMISE, UiTM                                                                                      |                                                                                                                                                                                                                                                                                  | Azrin Ahmad; Enizza Kasim; Irni Suhayu Sapian; Mohd Faizal Abu Bakar; Mohd Ghows Mohd Azzam.; Mohd Noor Mat Isa; Nor Afza Johari; Nurhezreen Md Iqbal; Shamsidar Sopia; Siti Noraini Othman; Yusuf Muhammad Noor Ariza Adnan; Fadzilah Mohd Nor; Lim Wai Feng; Mohd Asif Mohd Sukri; Mohd Nur Fakhruzzaman Norrihaz; Mohd Zaki Salleh; Sazzli Shaahan Kassim; Siti Farah Alwani Mohd Nawi; Siti Hamimah Sheikh Abdul Kadir; Teh Lay Kek; Wang Seok Mui                                                                                                                                                                                                                                                                                                                                                                                                                                                                                                                                                                                        |
| EPI_ISL_8325428, EPI_ISL_9320893, EPI_ISL_9320895, EPI_ISL_9320897, EPI_ISL_9320903, EPI_ISL_9320908, EPI_ISL_9320910, EPI_ISL_9320915, EPI_ISL_9320917, EPI_ISL_9320920, EPI_ISL_9320922, EPI_ISL_9320924, EPI_ISL_9320929, EPI_ISL_9320931, EPI_ISL_9320933, EPI_ISL_9320936, EPI_ISL_9320938, EPI_ISL_9320940, EPI_ISL_9320943, EPI_ISL_9320946, EPI_ISL_9320949, EPI_ISL_9320952, EPI_ISL_9320954, EPI_ISL_9320957, EPI_ISL_9320959, EPI_ISL_9320961, EPI_ISL_9320964, EPI_ISL_9320968, EPI_ISL_9320973, EPI_ISL_9320976 | see above                                                                                                           | Philippine Airport Diagnostic Laboratory                                                                                                     | Philippine Genome Center                                                                                                                                                                                                                                                         | Alethea R. de Guzman; Alyssa Joyce E. Telles; Angelica A. Garcia; Anna Ong-Lim; Arianne A. Zamora; Benedict A. Maralit; Carlo M. Lapid; Celia Carlos; Cynthia P. Saloma; Devon Ray Pacial; Diomedes A. Cariño; Edsel Maurice Salvana; El King D. Morado; Elcid Aaron R. Pangilinan; Eva Maria Cutiongco-de la Paz; Francis A. Tablizo; Henrietta Marie Rodriguez; Jaime C. Montoya; Jan Michael C. Yap; Jarvin E. Nipales; Jo-Hannah S. Llames; John Michael Egana; John Q. Wong; Johnny A. Ong; Joshua Gregor A. Dizon; Joshua Jose Endozo; Juan Antonio R. Magalang; Karol Sophia Agape R. Padilla; Kris P. Punayan; Kristina Patriz Dela Cruz; Lindsay Clare D.L. Carandang; Ma. Exanil Planting; Marc Edsel C. Ayes; Maria Rosario Singh-Vergeire; Maria Sofia L. Yangzon; Marielle M. Gamboa; Marissa Alejandria; Niña Francesca Bustamante; Razel Nikka M. Hao; Renato Jacinto Q. Mantaring; Rianna Patricia S. Cruz; Razel A. Medina; Shiela Mae M. Araiza; Yvonne Valerie Austria; Zipporah Mariebelle R. Enriquez; Zryel V. Mollejon |



|                                                                                                                                                                                                                                                                                                                                                                                                                                                                                                                                                                                                                                                                      |                                                                                |                                                                                                                                            |                                                                                                                                                                                                                                                                                                                                                                                                                                                                                                                                                                                                                                                                                                                                                                                                                                                                                                                                                                                                            |                                                                                                                                                                                                                                                                                                                                                                        |
|----------------------------------------------------------------------------------------------------------------------------------------------------------------------------------------------------------------------------------------------------------------------------------------------------------------------------------------------------------------------------------------------------------------------------------------------------------------------------------------------------------------------------------------------------------------------------------------------------------------------------------------------------------------------|--------------------------------------------------------------------------------|--------------------------------------------------------------------------------------------------------------------------------------------|------------------------------------------------------------------------------------------------------------------------------------------------------------------------------------------------------------------------------------------------------------------------------------------------------------------------------------------------------------------------------------------------------------------------------------------------------------------------------------------------------------------------------------------------------------------------------------------------------------------------------------------------------------------------------------------------------------------------------------------------------------------------------------------------------------------------------------------------------------------------------------------------------------------------------------------------------------------------------------------------------------|------------------------------------------------------------------------------------------------------------------------------------------------------------------------------------------------------------------------------------------------------------------------------------------------------------------------------------------------------------------------|
| EPI_ISL_8408987                                                                                                                                                                                                                                                                                                                                                                                                                                                                                                                                                                                                                                                      | Philippine General Hospital (PGH)                                              | Philippine Genome Center                                                                                                                   | Nikka M. Hao; Renato Jacinto Q. Mantaring; Rianna Patricia S. Cruz; Rizel A. Medina; Shiela Mae M. Araiza; Yvonne Valerie Austria; Zipporah Mariebelle R. Enriquez; Zyrel V. Molléjon                                                                                                                                                                                                                                                                                                                                                                                                                                                                                                                                                                                                                                                                                                                                                                                                                      |                                                                                                                                                                                                                                                                                                                                                                        |
| EPI_ISL_9321487, EPI_ISL_9321489, EPI_ISL_9321492, EPI_ISL_9321495, EPI_ISL_9321497, EPI_ISL_9321498, EPI_ISL_9321499, EPI_ISL_9324186                                                                                                                                                                                                                                                                                                                                                                                                                                                                                                                               | see above                                                                      | Philippine National Police Crime Laboratory (PNP Crime Lab.)                                                                               | Alethea R. de Guzman; Alyssa Joyce E. Telles; Anna Ong-Lim; Arianne A. Zamora; Benedict A. Maralit; Carlo M. Lapid; Celia Carlos; Cynthia P. Saloma; Devon Ray Pacial; Diomedes A. Cariño; Edsel Maurice Salvana; El King D. Morado; Elcid Aaron R. Pangilinan; Eva Maria Cutiungco-de la Paz; Francis A. Tablizo; Henrietta Marie Rodriguez; Jaime C. Montoya; Jan Michael C. Yap; Jarvin E. Nipales; Jo-Hannah S. Llamas; John Michael Egana; John Q. Wong; Joshua Gregor A. Dizon; Joshua Jose Endozo; Juan Antonio R. Magalang; Karol Sophia Agape R. Padilla; Kris P. Punayan; Kristina Patriz Dela Cruz; Lindsay Clare D.L. Carandang; Ma. Exanii Planting; Marc Edsel C. Ayes; Maria Rosario Singh-Vergeire; Maria Sofia L. Yangzon; Marielle M. Gamboa; Marissa Alejandria; Niña Francesca Bustamante; Razel Nikka M. Hao; Renato Jacinto Q. Mantaring; Rianna Patricia S. Cruz; Rizel A. Medina; Shiela Mae M. Araiza; Yvonne Valerie Austria; Zipporah Mariebelle R. Enriquez; Zyrel V. Molléjon |                                                                                                                                                                                                                                                                                                                                                                        |
| EPI_ISL_9322895, EPI_ISL_9322908, EPI_ISL_9322909, EPI_ISL_9322912, EPI_ISL_9322914, EPI_ISL_9322915, EPI_ISL_9322916, EPI_ISL_9322954, EPI_ISL_9322959, EPI_ISL_9322960, EPI_ISL_9323120, EPI_ISL_9323121, EPI_ISL_9323123, EPI_ISL_9323125, EPI_ISL_9323130, EPI_ISL_9323131, EPI_ISL_9323140, EPI_ISL_9323143                                                                                                                                                                                                                                                                                                                                                     | see above                                                                      | Philippine Red Cross Clark Molecular Laboratory                                                                                            | Alethea R. de Guzman; Alyssa Joyce E. Telles; Angelica A. Garcia; Anna Ong-Lim; Benedict A. Maralit; Carlo M. Lapid; Celia Carlos; Cynthia P. Saloma; Devon Ray Pacial; Diomedes A. Cariño; Edsel Maurice Salvana; El King D. Morado; Elcid Aaron R. Pangilinan; Eva Maria Cutiungco-de la Paz; Francis A. Tablizo; Henrietta Marie Rodriguez; Jaime C. Montoya; Jan Michael C. Yap; Jarvin E. Nipales; Jo-Hannah S. Llamas; John Michael Egana; John Q. Wong; Johnny A. Ong; Joshua Gregor A. Dizon; Joshua Jose Endozo; Karol Sophia Agape R. Padilla; Kris P. Punayan; Kristina Patriz Dela Cruz; Lindsay Clare D.L. Carandang; Ma. Exanii Planting; Marc Edsel C. Ayes; Maria Rosario Singh-Vergeire; Maria Sofia L. Yangzon; Marielle M. Gamboa; Marissa Alejandria; Niña Francesca Bustamante; Razel Nikka M. Hao; Renato Jacinto Q. Mantaring; Rianna Patricia S. Cruz; Rizel A. Medina; Shiela Mae M. Araiza; Yvonne Valerie Austria; Zipporah Mariebelle R. Enriquez; Zyrel V. Molléjon           |                                                                                                                                                                                                                                                                                                                                                                        |
| EPI_ISL_8205201, EPI_ISL_8439493                                                                                                                                                                                                                                                                                                                                                                                                                                                                                                                                                                                                                                     | Public Health Laboratory, Public Health Service Amsterdam, The Netherlands     | Department of Medical Microbiology & Infection prevention, Amsterdam University Medical Centers location AMC                               | Akke Cornelissen; Fokla Zorzdrager; Janke Schinkel; Jelle Koopsen; Judith den Uijl; Marcel Jonges; Matthijs Welkers; Menno de Jong; Robin van Houdt; Sebastien Matamoros; Sjoerd Rebers; Sylvia Bruisten; Tjalling Leenstra and Mariken van der Lubben on behalf of the Amsterdam Regional Genomic epidemiology and Outbreak Surveillance (ARGOS) consortium                                                                                                                                                                                                                                                                                                                                                                                                                                                                                                                                                                                                                                               |                                                                                                                                                                                                                                                                                                                                                                        |
| EPI_ISL_7259544, EPI_ISL_7259701, EPI_ISL_7259710, EPI_ISL_7259716, EPI_ISL_7259721, EPI_ISL_7872306, EPI_ISL_7872307, EPI_ISL_7872308, EPI_ISL_9136991                                                                                                                                                                                                                                                                                                                                                                                                                                                                                                              | see above                                                                      | Public Health Ontario Laboratory                                                                                                           | Aimin Li; Alireza Eshaghi; Andre Villegas; Ashleigh Sullivan; Christine Frantz; Dean Maxwell; Esha Joshi; Jared Simpson; Jennifer L. Guthrie; Jonathan B Gubbay; Karthikeyan Sivaraman; Lawrence Heisler; Matthew Watson; Michael CY Li; Michael Laszloffy; Nahuel Fittipaldi; Philip Banh; Richard de Borja; Samir N Patel; Sandeep Nagra; Sandra Zittermann; Sarah Teatator; Vanessa G Allen; Yao Chen; Yogi Sundaravadanam                                                                                                                                                                                                                                                                                                                                                                                                                                                                                                                                                                              |                                                                                                                                                                                                                                                                                                                                                                        |
| EPI_ISL_8880076, EPI_ISL_9643324                                                                                                                                                                                                                                                                                                                                                                                                                                                                                                                                                                                                                                     | Quarantine Camp                                                                | Hong Kong Department of Health                                                                                                             | Alan K.L. Tsang; Edman T.K. Lam; Ken H.L. Ng; Patricia K. L. Leung; Peter C.W. Yip; Rickjason C.W. Chan                                                                                                                                                                                                                                                                                                                                                                                                                                                                                                                                                                                                                                                                                                                                                                                                                                                                                                    |                                                                                                                                                                                                                                                                                                                                                                        |
| EPI_ISL_9177570, EPI_ISL_9177571, EPI_ISL_9177572, EPI_ISL_9177574, EPI_ISL_9177575, EPI_ISL_9177576, EPI_ISL_9177578, EPI_ISL_9177579, EPI_ISL_9177581, EPI_ISL_9177582, EPI_ISL_9177585, EPI_ISL_9177586, EPI_ISL_9177588, EPI_ISL_9177589, EPI_ISL_9177590, EPI_ISL_9177595, EPI_ISL_9177596, EPI_ISL_9177597, EPI_ISL_9177598, EPI_ISL_9177599, EPI_ISL_9177600, EPI_ISL_9177601, EPI_ISL_9177602, EPI_ISL_9177603, EPI_ISL_9177605, EPI_ISL_9177607, EPI_ISL_9177608, EPI_ISL_9177609, EPI_ISL_9177610, EPI_ISL_9177611, EPI_ISL_9177612, EPI_ISL_9177613, EPI_ISL_9177614, EPI_ISL_9177615, EPI_ISL_9177616, EPI_ISL_9177617, EPI_ISL_9177619, EPI_ISL_9177620 | see above                                                                      | RESEARCH INSTITUTE FOR TROPICAL MEDICINE                                                                                                   | Research Institute for Tropical Medicine                                                                                                                                                                                                                                                                                                                                                                                                                                                                                                                                                                                                                                                                                                                                                                                                                                                                                                                                                                   | Alexander Sadiasa; Anne Pauline A. Alpino; Ardiane Ysabelle M. Dolor; Catalino S. Demetria; Criselda T. Bautista; Francisco Gerardo M. Polotan; Jefferson Earl J. Halog; Joseph Hughes; Kirstyn Brunker; Lei Lanna M. Dancel; Ma. Angelica A. Tujan; Mayan Uy-Lumandas; Othoniel Jan T. Onza; Simon Daldry; Timothy John R. Dizon; Yvina Lea F. Arguelles; Yao-Tsun Li |
| EPI_ISL_8565026, EPI_ISL_8565027                                                                                                                                                                                                                                                                                                                                                                                                                                                                                                                                                                                                                                     | RNA PATH LABS                                                                  | ILBS                                                                                                                                       | Arjun Bhugra; Chhagan Bihari Sharma; Ekta Gupta; Pramod Gautam; Rahul Garg; Reshu Agarwal; Shiv Kumar Sarin; Urviinder Kaur; Varun Suroliya                                                                                                                                                                                                                                                                                                                                                                                                                                                                                                                                                                                                                                                                                                                                                                                                                                                                |                                                                                                                                                                                                                                                                                                                                                                        |
| EPI_ISL_8885417                                                                                                                                                                                                                                                                                                                                                                                                                                                                                                                                                                                                                                                      | Rambag Government Hospital, Gandhidham                                         | Gujarat Biotechnology Research Centre                                                                                                      | Akhilesh Modi; Apurvasinh Puvar; Bhadreshsinh Gohil; Chaitanya Joshi; Disha Vora; Janvi Raval; Jaykumar Rangani; Madhvi Joshi; Munira Mehta; Nimesh Patel; Nitin Savaliya; NitinShukla; Priyank Chavda; Ramesh Pandit; Roshani Mishra; Sonal Sharma; Tasnim Trivedi; Zarna Patel                                                                                                                                                                                                                                                                                                                                                                                                                                                                                                                                                                                                                                                                                                                           |                                                                                                                                                                                                                                                                                                                                                                        |
| EPI_ISL_8769566, EPI_ISL_8769579                                                                                                                                                                                                                                                                                                                                                                                                                                                                                                                                                                                                                                     | Referral Lab, Spice Healthcare                                                 | ILBS                                                                                                                                       | Arjun Bhugra; Chhagan Bihari Sharma; Ekta Gupta; Pramod Gautam; Rahul Garg; Reshu Agarwal; Shiv Kumar Sarin; Urviinder Kaur; Varun Suroliya                                                                                                                                                                                                                                                                                                                                                                                                                                                                                                                                                                                                                                                                                                                                                                                                                                                                |                                                                                                                                                                                                                                                                                                                                                                        |
| EPI_ISL_8769856, EPI_ISL_8769858                                                                                                                                                                                                                                                                                                                                                                                                                                                                                                                                                                                                                                     | Referral Lab, Spice Healthcare Pvt. Ltd                                        | ILBS                                                                                                                                       | Arjun Bhugra; Chhagan Bihari Sharma; Ekta Gupta; Pramod Gautam; Rahul Garg; Reshu Agarwal; Shiv Kumar Sarin; Urviinder Kaur; Varun Suroliya                                                                                                                                                                                                                                                                                                                                                                                                                                                                                                                                                                                                                                                                                                                                                                                                                                                                |                                                                                                                                                                                                                                                                                                                                                                        |
| EPI_ISL_9128489                                                                                                                                                                                                                                                                                                                                                                                                                                                                                                                                                                                                                                                      | Regional Medical Sciences Center 12 Songkhla                                   | National Institute of Health, Department of Medical Sciences, Ministry of Public Health, Thailand                                          | Archawin Rojanawiwat; Natchaya Khadsang; Nuttida Thongpramol; Pakorn Piromtong; Pilaluk Okada; Sirikanda Wimol; Siriraporn Phuyugun; Sunthareeya Waicharoen; Suratchana Mitrat; Thanutsapa Thanadachakul                                                                                                                                                                                                                                                                                                                                                                                                                                                                                                                                                                                                                                                                                                                                                                                                   |                                                                                                                                                                                                                                                                                                                                                                        |
| EPI_ISL_8840710, EPI_ISL_8840711                                                                                                                                                                                                                                                                                                                                                                                                                                                                                                                                                                                                                                     | Regional Medical Sciences Center 6 Chonburi                                    | Division of Genomic Medicine and Innovation support, Department of Medical Sciences, Ministry of Public Health, Thailand                   | Archawin Rojanawiwat; Jirapha Pakdee; Natthakul Bunneang; Nuanjun Wichukhinda; Penpitcha Thawong; Pilaluk Akkapaiboon Okada; Pundharika Piboonsiri; Surakameth Mahasirimongkol; Waritta Sawaengdee                                                                                                                                                                                                                                                                                                                                                                                                                                                                                                                                                                                                                                                                                                                                                                                                         |                                                                                                                                                                                                                                                                                                                                                                        |
| EPI_ISL_8859072, EPI_ISL_8859074                                                                                                                                                                                                                                                                                                                                                                                                                                                                                                                                                                                                                                     | Regional VRDL, RMRC (ICMR), Dibrugarh                                          | Centre for Infectious Diseases, CSIR-NEIST                                                                                                 | G Narahari Sastry; Gayatri Gogoi; Jatin Kalita; Moirangthem G Singh; Munmi Bora; Pankaj Bharali; Prasenjit Manna; Romi Wahengbam; Tridip Phukan; Yasmin B Tapaddar                                                                                                                                                                                                                                                                                                                                                                                                                                                                                                                                                                                                                                                                                                                                                                                                                                         |                                                                                                                                                                                                                                                                                                                                                                        |
| EPI_ISL_8842222, EPI_ISL_8842303, EPI_ISL_8991307, EPI_ISL_9355842                                                                                                                                                                                                                                                                                                                                                                                                                                                                                                                                                                                                   | Respiratory Virus Unit, Microbiology Services Colindale, Public Health England | COVID-19 Genomics UK (COG-UK) Consortium                                                                                                   | PHE Covid Sequencing Team                                                                                                                                                                                                                                                                                                                                                                                                                                                                                                                                                                                                                                                                                                                                                                                                                                                                                                                                                                                  |                                                                                                                                                                                                                                                                                                                                                                        |
| EPI_ISL_8559646, EPI_ISL_8559900, EPI_ISL_8560013, EPI_ISL_8560180, EPI_ISL_8560294, EPI_ISL_8560339, EPI_ISL_8560340, EPI_ISL_8560342, EPI_ISL_8560357, EPI_ISL_8560423, EPI_ISL_8560425, EPI_ISL_8560428, EPI_ISL_8560490, EPI_ISL_8560498, EPI_ISL_8560500                                                                                                                                                                                                                                                                                                                                                                                                        | see above                                                                      | SARS-CoV-2 testing team, National Institute of Infectious Diseases                                                                         | Pathogen Genomics Center, National Institute of Infectious Diseases                                                                                                                                                                                                                                                                                                                                                                                                                                                                                                                                                                                                                                                                                                                                                                                                                                                                                                                                        | Hazuka Y Furihata; Kentaro Itokawa; Makoto Kuroda; Masanori Hashino; Masumichi Saito; Naomi Nojiri; Nozomu Hanaoka; Rina Tanaka; Tsugoto Fujimoto; Tsuyoshi Sekizuka                                                                                                                                                                                                   |
| EPI_ISL_8721609                                                                                                                                                                                                                                                                                                                                                                                                                                                                                                                                                                                                                                                      | SECRETARIA MUNICIPAL DE SAUDE SOROCABA                                         | Instituto Butantan                                                                                                                         | Antonio Jorge Martins; Claudia Renata dos Santos Barros; David Schlesinger; Debora Botequiao Moretti; Dimas Tadeu Covas; Elaine Cristina Marqueze; Elaine Vieira Santos; Evandra Strazza Rodrigues; Heidge Fukumasu; Jayme Augusto de Souza-Neto; José Salvatore Leister Patané; Luiz Alcantara; Luiz Lehmann Coutinho; Maria Carolina Elias; Maurício Lacerda Nogueira; Rafael dos Santos Bezerra; Raul Machado Neto; Rejane Maria Tommasini Grotto; Ricardo Haddad; Sandra Coccuzzo Sampaio Vessoni; Simone Kashima; Svetoslav Nanev Slavov; Vincent Louis Viala                                                                                                                                                                                                                                                                                                                                                                                                                                         |                                                                                                                                                                                                                                                                                                                                                                        |
| EPI_ISL_8257111                                                                                                                                                                                                                                                                                                                                                                                                                                                                                                                                                                                                                                                      | SELAS MEDILYS                                                                  | Department of Virology, Henri Mondor University Hospital, Assistance Publique Hôpitaux de Paris, Université Paris-Est Créteil, INSERM U955 | Alexandre Soulier; Christophe Rodriguez; Elisabeth Trawinski; Guillaume Gricourt; Jean-Michel Pawlowsky; Melissa N'Debi; Slim Fourati; Vanessa Demontant                                                                                                                                                                                                                                                                                                                                                                                                                                                                                                                                                                                                                                                                                                                                                                                                                                                   |                                                                                                                                                                                                                                                                                                                                                                        |
| EPI_ISL_9092170, EPI_ISL_9092172, EPI_ISL_9092174, EPI_ISL_9092175, EPI_ISL_9334675                                                                                                                                                                                                                                                                                                                                                                                                                                                                                                                                                                                  | SIR CV RAMAN GENERAL HOSPITAL, BENGALURU                                       | National Center for Biological Sciences, TIFR - Rockefeller Foundation                                                                     | Awadhesh Pandit; Bhagyashree Madhav Shelar; Darshan Sreenivas; Dimple Notani; Kathirvel Kandasamy; Lakshminarayanan CP; Satyajit Mayor; Uma Ramakrishnan                                                                                                                                                                                                                                                                                                                                                                                                                                                                                                                                                                                                                                                                                                                                                                                                                                                   |                                                                                                                                                                                                                                                                                                                                                                        |
| EPI_ISL_8342450                                                                                                                                                                                                                                                                                                                                                                                                                                                                                                                                                                                                                                                      | SN Genelab Pvt. Ltd, Surat                                                     | Gujarat Biotechnology Research Centre                                                                                                      | Akhilesh Modi; Apurvasinh Puvar; Bhadreshsinh Gohil; Chaitanya Joshi; Disha Vora; Janvi Raval; Jaykumar Rangani; Madhvi Joshi; Nimesh Patel; Nirmal Vanialwa; Nitin Savaliya; Nitin Shukla; Priyank Chavda; Ramesh Pandit; Roshani Mishra; Sonal Sharma; Tasnim Trivedi; Zarna Patel                                                                                                                                                                                                                                                                                                                                                                                                                                                                                                                                                                                                                                                                                                                       |                                                                                                                                                                                                                                                                                                                                                                        |
| EPI_ISL_8163863, EPI_ISL_8163864, EPI_ISL_8166491, EPI_ISL_8166492, EPI_ISL_8166493, EPI_ISL_8166494, EPI_ISL_8166495, EPI_ISL_8166497, EPI_ISL_8166499, EPI_ISL_8166545, EPI_ISL_8166555, EPI_ISL_8166573                                                                                                                                                                                                                                                                                                                                                                                                                                                           | see above                                                                      | STAR IMAGING & PATH LAB PVT. LTD                                                                                                           | ILBS                                                                                                                                                                                                                                                                                                                                                                                                                                                                                                                                                                                                                                                                                                                                                                                                                                                                                                                                                                                                       | Arjun Bhugra; Chhagan Bihari Sharma; Ekta Gupta; Pramod Gautam; Rahul Garg; Reshu Agarwal; Shiv Kumar Sarin; Urviinder Kaur; Varun Suroliya                                                                                                                                                                                                                            |
| EPI_ISL_8676451                                                                                                                                                                                                                                                                                                                                                                                                                                                                                                                                                                                                                                                      | SYNLAB MVZ Berlin                                                              | Robert Koch Institute                                                                                                                      |                                                                                                                                                                                                                                                                                                                                                                                                                                                                                                                                                                                                                                                                                                                                                                                                                                                                                                                                                                                                            |                                                                                                                                                                                                                                                                                                                                                                        |
| EPI_ISL_8667970                                                                                                                                                                                                                                                                                                                                                                                                                                                                                                                                                                                                                                                      | SYNLAB MVZ Hamburg                                                             | Robert Koch Institute                                                                                                                      |                                                                                                                                                                                                                                                                                                                                                                                                                                                                                                                                                                                                                                                                                                                                                                                                                                                                                                                                                                                                            |                                                                                                                                                                                                                                                                                                                                                                        |
| EPI_ISL_8677098                                                                                                                                                                                                                                                                                                                                                                                                                                                                                                                                                                                                                                                      | SYNLAB MVZ Leinfelden-Echterdingen                                             | Robert Koch Institute                                                                                                                      |                                                                                                                                                                                                                                                                                                                                                                                                                                                                                                                                                                                                                                                                                                                                                                                                                                                                                                                                                                                                            |                                                                                                                                                                                                                                                                                                                                                                        |
| EPI_ISL_8225556                                                                                                                                                                                                                                                                                                                                                                                                                                                                                                                                                                                                                                                      | SYNLAB MVZ Leverkusen                                                          | Robert Koch Institute                                                                                                                      |                                                                                                                                                                                                                                                                                                                                                                                                                                                                                                                                                                                                                                                                                                                                                                                                                                                                                                                                                                                                            |                                                                                                                                                                                                                                                                                                                                                                        |
| EPI_ISL_8667440, EPI_ISL_8667448, EPI_ISL_8667738, EPI_ISL_8674546, EPI_ISL_8674556, EPI_ISL_8674680, EPI_ISL_8674708, EPI_ISL_8674710, EPI_ISL_8676323, EPI_ISL_8676324, EPI_ISL_8676393, EPI_ISL_8676529, EPI_ISL_8683660, EPI_ISL_8683758, EPI_ISL_8684360                                                                                                                                                                                                                                                                                                                                                                                                        | see above                                                                      | SYNLAB MVZ Weiden                                                                                                                          | Robert Koch Institute                                                                                                                                                                                                                                                                                                                                                                                                                                                                                                                                                                                                                                                                                                                                                                                                                                                                                                                                                                                      |                                                                                                                                                                                                                                                                                                                                                                        |
| EPI_ISL_9324272                                                                                                                                                                                                                                                                                                                                                                                                                                                                                                                                                                                                                                                      | SYSTEMATIC LABS KOTHUNOOR FPEC                                                 | inStem, NCBS-INSACOG                                                                                                                       | Aswin SaiNarain; Dasaradhi Palakodeti; Uma Ramakrishnan                                                                                                                                                                                                                                                                                                                                                                                                                                                                                                                                                                                                                                                                                                                                                                                                                                                                                                                                                    |                                                                                                                                                                                                                                                                                                                                                                        |
| EPI_ISL_9510134, EPI_ISL_9510135                                                                                                                                                                                                                                                                                                                                                                                                                                                                                                                                                                                                                                     | Sahakara Nagar PHC                                                             | inStem, NCBS-INSACOG                                                                                                                       | Aswin SaiNarain; Dasaradhi Palakodeti; Uma Ramakrishnan                                                                                                                                                                                                                                                                                                                                                                                                                                                                                                                                                                                                                                                                                                                                                                                                                                                                                                                                                    |                                                                                                                                                                                                                                                                                                                                                                        |
| EPI_ISL_8744201, EPI_ISL_8885420                                                                                                                                                                                                                                                                                                                                                                                                                                                                                                                                                                                                                                     | Sanjeevani Metropolis, Rajkot                                                  | Gujarat Biotechnology Research Centre                                                                                                      | Akhilesh Modi; Apurvasinh Puvar; Bhadreshsinh Gohil; Chaitanya Joshi; Disha Vora; Janvi Raval; Jaykumar Rangani; Madhvi Joshi; Nimesh Patel; Nitin Savaliya; Nitin Shukla; Priyank Chavda; Ramesh Pandit; Roshani Mishra; Shafquat Jahan; Sonal Sharma; Tasnim Trivedi; Zarna Patel                                                                                                                                                                                                                                                                                                                                                                                                                                                                                                                                                                                                                                                                                                                        |                                                                                                                                                                                                                                                                                                                                                                        |
| EPI_ISL_9781681, EPI_ISL_9781682, EPI_ISL_9781683, EPI_ISL_9781684, EPI_ISL_9781685, EPI_ISL_9781686, EPI_ISL_9781689, EPI_ISL_9781691                                                                                                                                                                                                                                                                                                                                                                                                                                                                                                                               | see above                                                                      | School of Tropical Medicine, Kolkata                                                                                                       | CSIR-Indian Institute of Chemical Biology                                                                                                                                                                                                                                                                                                                                                                                                                                                                                                                                                                                                                                                                                                                                                                                                                                                                                                                                                                  | Arun Bandyopadhyay; INSACOG; Partha Chakrabarti; Poulomi Sarkar; Saikat Chakrabarti; Sarthak Banerjee; Siddik Sarkar                                                                                                                                                                                                                                                   |
| EPI_ISL_8885405, EPI_ISL_8885411                                                                                                                                                                                                                                                                                                                                                                                                                                                                                                                                                                                                                                     | Scientific Diagnostic Centre Pvt.Ltd, Ahmedabad                                | Gujarat Biotechnology Research Centre                                                                                                      | Akhilesh Modi; Apurvasinh Puvar; Bhadreshsinh Gohil; Chaitanya Joshi; Disha Vora; Janvi Raval; Jaykumar Rangani; Madhvi Joshi; Mona; Nimesh Patel; Nitin Savaliya; NitinShukla; Priyank Chavda; Ramesh Pandit; Roshani Mishra; Sonal Sharma; Tasnim Trivedi; Zarna Patel                                                                                                                                                                                                                                                                                                                                                                                                                                                                                                                                                                                                                                                                                                                                   |                                                                                                                                                                                                                                                                                                                                                                        |
| EPI_ISL_8342468                                                                                                                                                                                                                                                                                                                                                                                                                                                                                                                                                                                                                                                      | Scientific Diagnostic Centre Pvt. Ltd., Ahmedabad                              | Gujarat Biotechnology Research Centre                                                                                                      | Akhilesh Modi; Apurvasinh Puvar; Bhadreshsinh Gohil; Chaitanya Joshi; Disha Vora; Janvi Raval; Jaykumar Rangani; Madhvi Joshi; Moksha Narechania; Nimesh Patel; Nitin Savaliya; Nitin Shukla; Priyank Chavda; Ramesh Pandit; Roshani Mishra; Sonal Sharma; Tasnim Trivedi; Zarna Patel                                                                                                                                                                                                                                                                                                                                                                                                                                                                                                                                                                                                                                                                                                                     |                                                                                                                                                                                                                                                                                                                                                                        |
| EPI_ISL_8546736                                                                                                                                                                                                                                                                                                                                                                                                                                                                                                                                                                                                                                                      | Smier Medical College, Surat                                                   | Gujarat Biotechnology Research Centre                                                                                                      | Akhilesh Modi; Apurvasinh Puvar; Bhadreshsinh Gohil; Chaitanya Joshi; Disha Vora; Janvi Raval; Jaykumar Rangani; Madhvi Joshi; Manish Patel; Nimesh Patel; Nitin Savaliya; Nitin Shukla; Priyank Chavda; Ramesh Pandit; Roshani Mishra; Sonal Sharma; Tasnim Trivedi; Zarna Patel                                                                                                                                                                                                                                                                                                                                                                                                                                                                                                                                                                                                                                                                                                                          |                                                                                                                                                                                                                                                                                                                                                                        |
| EPI_ISL_8666432                                                                                                                                                                                                                                                                                                                                                                                                                                                                                                                                                                                                                                                      | Sonic - Labor Staber Bayreuth                                                  | Robert Koch Institute                                                                                                                      |                                                                                                                                                                                                                                                                                                                                                                                                                                                                                                                                                                                                                                                                                                                                                                                                                                                                                                                                                                                                            |                                                                                                                                                                                                                                                                                                                                                                        |
| EPI_ISL_9323192, EPI_ISL_9323197                                                                                                                                                                                                                                                                                                                                                                                                                                                                                                                                                                                                                                     | Southern Philippines Medical Center (SPMC-SNL-MBL)                             | Philippine Genome Center                                                                                                                   | Alethea R. de Guzman; Alyssa Joyce E. Telles; Angelica A. Garcia; Anna Ong-Lim; Benedict A. Maralit; Carlo M. Lapid; Celia Carlos; Cynthia P. Saloma; Devon Ray Pacial; Diomedes A. Cariño; Edsel Maurice Salvana; El King D. Morado; Elcid Aaron R. Pangilinan; Eva Maria Cutiungco-de la Paz; Francis A. Tablizo; Henrietta Marie Rodriguez; Jaime C. Montoya; Jan Michael C. Yap; Jarvin E. Nipales; Jo-Hannah S. Llamas; John Michael Egana; John Q. Wong; Johnny A. Ong; Joshua Gregor A. Dizon; Joshua Jose Endozo; Karol Sophia Agape R. Padilla; Kris P. Punayan; Kristina Patriz Dela Cruz; Lindsay Clare D.L. Carandang; Ma. Exanii Planting; Marc Edsel C. Ayes; Maria Rosario Singh-Vergeire; Maria Sofia L. Yangzon; Marielle M. Gamboa; Marissa Alejandria; Niña Francesca Bustamante; Razel Nikk M. Hao; Renato Jacinto Q. Mantaring; Rianna Patricia S. Cruz; Rizel A. Medina; Shiela Mae M. Araiza; Yvonne Valerie Austria; Zipporah Mariebelle R. Enriquez; Zyrel V. Molléjon            |                                                                                                                                                                                                                                                                                                                                                                        |
| EPI_ISL_9023209                                                                                                                                                                                                                                                                                                                                                                                                                                                                                                                                                                                                                                                      | Speciality Microtech Lab, Ahmedabad                                            | Gujarat Biotechnology Research Centre                                                                                                      | Akhilesh Modi; Apurvasinh Puvar; Bhadreshsinh Gohil; Bhavin; Chaitanya Joshi; Disha Vora; Janvi Raval; Jaykumar Rangani; Madhvi Joshi; Nimesh Patel; Nitin Savaliya; Nitin Shukla; Priyank Chavda; Ramesh Pandit; Roshani Mishra; Sonal Sharma; Tasnim Trivedi; Zarna Patel                                                                                                                                                                                                                                                                                                                                                                                                                                                                                                                                                                                                                                                                                                                                |                                                                                                                                                                                                                                                                                                                                                                        |

|                                                                                                                                                                                                                                                                                                                                                                                                                                                                                                                                                                                                                                                                                                                                                                                                                                                                                                                                                                                                                                                            |                                                                             |                                                                                                   |                                                                                                                                                                                                                                                                                                                                                                                                                                                                                                                                                                                                                                                                                                                                                                                                                                                                                                                                                                                               |
|------------------------------------------------------------------------------------------------------------------------------------------------------------------------------------------------------------------------------------------------------------------------------------------------------------------------------------------------------------------------------------------------------------------------------------------------------------------------------------------------------------------------------------------------------------------------------------------------------------------------------------------------------------------------------------------------------------------------------------------------------------------------------------------------------------------------------------------------------------------------------------------------------------------------------------------------------------------------------------------------------------------------------------------------------------|-----------------------------------------------------------------------------|---------------------------------------------------------------------------------------------------|-----------------------------------------------------------------------------------------------------------------------------------------------------------------------------------------------------------------------------------------------------------------------------------------------------------------------------------------------------------------------------------------------------------------------------------------------------------------------------------------------------------------------------------------------------------------------------------------------------------------------------------------------------------------------------------------------------------------------------------------------------------------------------------------------------------------------------------------------------------------------------------------------------------------------------------------------------------------------------------------------|
| EPI_ISL_9322746,<br>EPI_ISL_9322747,<br>EPI_ISL_9322748,<br>EPI_ISL_9322749                                                                                                                                                                                                                                                                                                                                                                                                                                                                                                                                                                                                                                                                                                                                                                                                                                                                                                                                                                                | St Luke's Medical Center - QC                                               | Philippine Genome Center                                                                          | Alethea R. de Guzman; Alyssa Joyce E. Telles; Angelica A. Garcia; Anna Ong-Lim; Benedict A. Maralit; Carlo M. Lapid; Celia Carlos; Cynthia P. Saloma; Devon Ray Pacial; Diomedes A. Cariño; Edsel Maurice Salvana; El King D. Morado; Elcid Aaron R. Pangilinan; Eva Maria Cutiongo-de la Paz; Francis A. Tablizo; Henrietta Marie Rodriguez; Jaime C. Montoya; Jan Michael C. Yap; Jarvin E. Nipales; Jo-Hannah S. Llamas; John Michael Egan; John Q. Wong; Johnny A. Ong; Joshua Gregor A. Dizon; Joshua Jose Endozo; Karol Sophia Agape R. Padilla; Kris P. Punayan; Kristina Patriz Dela Cruz; Lindsay Clare D.L. Carandang; Ma. Exanil Plantig; Marc Edsel C. Ayes; Maria Rosario Singh-Vergeire; Maria Sofia L. Yangzon; Marielle M. Gamboa; Marissa Alejandria; Niña Francesca Bustamante; Razel Nikka M. Hao; Renato Jacinto Q. Mantaring; Rianna Patricia S. Cruz; Rizel A. Medina; Shiela Mae M. Araiza; Yvonne Valerie Austria; Zipporah Mariebelle R. Enriquez; Zryel V. Mollejon |
| EPI_ISL_9321836,<br>EPI_ISL_9323324                                                                                                                                                                                                                                                                                                                                                                                                                                                                                                                                                                                                                                                                                                                                                                                                                                                                                                                                                                                                                        | St. Elizabeth Hospital                                                      | Philippine Genome Center                                                                          | Alethea R. de Guzman; Alyssa Joyce E. Telles; Angelica A. Garcia; Anna Ong-Lim; Benedict A. Maralit; Carlo M. Lapid; Celia Carlos; Cynthia P. Saloma; Devon Ray Pacial; Diomedes A. Cariño; Edsel Maurice Salvana; El King D. Morado; Elcid Aaron R. Pangilinan; Eva Maria Cutiongo-de la Paz; Francis A. Tablizo; Henrietta Marie Rodriguez; Jaime C. Montoya; Jan Michael C. Yap; Jarvin E. Nipales; Jo-Hannah S. Llamas; John Michael Egan; John Q. Wong; Johnny A. Ong; Joshua Gregor A. Dizon; Joshua Jose Endozo; Karol Sophia Agape R. Padilla; Kris P. Punayan; Kristina Patriz Dela Cruz; Lindsay Clare D.L. Carandang; Ma. Exanil Plantig; Marc Edsel C. Ayes; Maria Rosario Singh-Vergeire; Maria Sofia L. Yangzon; Marielle M. Gamboa; Marissa Alejandria; Niña Francesca Bustamante; Razel Nikka M. Hao; Renato Jacinto Q. Mantaring; Rianna Patricia S. Cruz; Rizel A. Medina; Shiela Mae M. Araiza; Yvonne Valerie Austria; Zipporah Mariebelle R. Enriquez; Zryel V. Mollejon |
| EPI_ISL_9321056, EPI_ISL_9321058, EPI_ISL_9321060, EPI_ISL_9321062, EPI_ISL_9321065, EPI_ISL_9321067, EPI_ISL_9321445                                                                                                                                                                                                                                                                                                                                                                                                                                                                                                                                                                                                                                                                                                                                                                                                                                                                                                                                      | see above                                                                   | St. Luke's Medical Center - Bgc (HB)                                                              | Philippine Genome Center                                                                                                                                                                                                                                                                                                                                                                                                                                                                                                                                                                                                                                                                                                                                                                                                                                                                                                                                                                      |
| EPI_ISL_9323410                                                                                                                                                                                                                                                                                                                                                                                                                                                                                                                                                                                                                                                                                                                                                                                                                                                                                                                                                                                                                                            | St. Luke's Medical Center- QC                                               | Philippine Genome Center                                                                          | Alethea R. de Guzman; Alyssa Joyce E. Telles; Angelica A. Garcia; Anna Ong-Lim; Benedict A. Maralit; Carlo M. Lapid; Celia Carlos; Cynthia P. Saloma; Devon Ray Pacial; Diomedes A. Cariño; Edsel Maurice Salvana; El King D. Morado; Elcid Aaron R. Pangilinan; Eva Maria Cutiongo-de la Paz; Francis A. Tablizo; Henrietta Marie Rodriguez; Jaime C. Montoya; Jan Michael C. Yap; Jarvin E. Nipales; Jo-Hannah S. Llamas; John Michael Egan; John Q. Wong; Johnny A. Ong; Joshua Gregor A. Dizon; Joshua Jose Endozo; Karol Sophia Agape R. Padilla; Kris P. Punayan; Kristina Patriz Dela Cruz; Lindsay Clare D.L. Carandang; Ma. Exanil Plantig; Marc Edsel C. Ayes; Maria Rosario Singh-Vergeire; Maria Sofia L. Yangzon; Marielle M. Gamboa; Marissa Alejandria; Niña Francesca Bustamante; Razel Nikka M. Hao; Renato Jacinto Q. Mantaring; Rianna Patricia S. Cruz; Rizel A. Medina; Shiela Mae M. Araiza; Yvonne Valerie Austria; Zipporah Mariebelle R. Enriquez; Zryel V. Mollejon |
| EPI_ISL_8769629,<br>EPI_ISL_8769632,<br>EPI_ISL_8769635                                                                                                                                                                                                                                                                                                                                                                                                                                                                                                                                                                                                                                                                                                                                                                                                                                                                                                                                                                                                    | Star Imaging & Path Lab Pvt. Ltd.,<br>New Delhi                             | ILBS                                                                                              | Arjun Bhugra; Chhagan Bihari Sharma; Ekta Gupta; Pramod Gautam; Rahul Garg; Reshu Agarwal; Shiv Kumar Sarin; Urvinder Kaur; Varun Suroliya                                                                                                                                                                                                                                                                                                                                                                                                                                                                                                                                                                                                                                                                                                                                                                                                                                                    |
| EPI_ISL_8494314                                                                                                                                                                                                                                                                                                                                                                                                                                                                                                                                                                                                                                                                                                                                                                                                                                                                                                                                                                                                                                            | Sterling Accuris Diagnostic, Mehsana                                        | Gujarat Biotechnology Research Centre                                                             | Akhilesh Modi; Apurvasinh Puvar; Bhadreshsinh Gohil; Chaitanya Joshi; Disha Vora; Janvi Raval; Jaykumar Rangani; Madhvi Joshi; NidhiChaudhary; Nimesh Patel; Nitin Savaliya; Nitin Shukla; Priyank Chavda; Ramesh Pandit; Roshani Mishra; Sonal Sharma; Tasnim Trivedi; Zarna Patel                                                                                                                                                                                                                                                                                                                                                                                                                                                                                                                                                                                                                                                                                                           |
| EPI_ISL_8885413,<br>EPI_ISL_8885414                                                                                                                                                                                                                                                                                                                                                                                                                                                                                                                                                                                                                                                                                                                                                                                                                                                                                                                                                                                                                        | Sterling Diagnostic Center,<br>Bhavnagar                                    | Gujarat Biotechnology Research Centre                                                             | Akhilesh Modi; Apurvasinh Puvar; Bhadreshsinh Gohil; Chaitanya Joshi; Disha Vora; Janvi Raval; Jaykumar Rangani; Krupal Hapani; Madhvi Joshi; Nimesh Patel; Nitin Savaliya; Nitin Shukla; Priyank Chavda; Ramesh Pandit; Roshani Mishra; Sonal Sharma; Tasnim Trivedi; Zarna Patel                                                                                                                                                                                                                                                                                                                                                                                                                                                                                                                                                                                                                                                                                                            |
| EPI_ISL_8342460,<br>EPI_ISL_8342461                                                                                                                                                                                                                                                                                                                                                                                                                                                                                                                                                                                                                                                                                                                                                                                                                                                                                                                                                                                                                        | Sunflower Laboratory, Ahmedabad                                             | Gujarat Biotechnology Research Centre                                                             | Akhilesh Modi; Apurvasinh Puvar; Bhadreshsinh Gohil; Chaitanya Joshi; Disha Vora; Janvi Raval; Jaykumar Rangani; Madhvi Joshi; Mantrik Kaur; Nimesh Patel; Nitin Savaliya; Nitin Shukla; Priyank Chavda; Ramesh Pandit; Roshani Mishra; Sonal Sharma; Tasnim Trivedi; Zarna Patel                                                                                                                                                                                                                                                                                                                                                                                                                                                                                                                                                                                                                                                                                                             |
| EPI_ISL_8885407                                                                                                                                                                                                                                                                                                                                                                                                                                                                                                                                                                                                                                                                                                                                                                                                                                                                                                                                                                                                                                            | Sunflower Laboratory, Memnagar,<br>Ahmedabad                                | Gujarat Biotechnology Research Centre                                                             | Akhilesh Modi; Apurvasinh Puvar; Bhadreshsinh Gohil; Chaitanya Joshi; D.G.Patel; Disha Vora; Janvi Raval; Jaykumar Rangani; Madhvi Joshi; Nimesh Patel; Nitin Savaliya; NitinShukla; Priyank Chavda; Ramesh Pandit; Roshani Mishra; Sonal Sharma; Tasnim Trivedi; Zarna Patel                                                                                                                                                                                                                                                                                                                                                                                                                                                                                                                                                                                                                                                                                                                 |
| EPI_ISL_9321500, EPI_ISL_9321501, EPI_ISL_9321502, EPI_ISL_9321503, EPI_ISL_9321504, EPI_ISL_9321505, EPI_ISL_9321506, EPI_ISL_9321507, EPI_ISL_9321508, EPI_ISL_9321511, EPI_ISL_9321514, EPI_ISL_9321516, EPI_ISL_9321522, EPI_ISL_9321531, EPI_ISL_9321534, EPI_ISL_9322801, EPI_ISL_9322802, EPI_ISL_9322803                                                                                                                                                                                                                                                                                                                                                                                                                                                                                                                                                                                                                                                                                                                                           | see above                                                                   | Supercare Medical Services, Inc.                                                                  | Philippine Genome Center                                                                                                                                                                                                                                                                                                                                                                                                                                                                                                                                                                                                                                                                                                                                                                                                                                                                                                                                                                      |
| EPI_ISL_8885404,<br>EPI_ISL_8885410,<br>EPI_ISL_8885489                                                                                                                                                                                                                                                                                                                                                                                                                                                                                                                                                                                                                                                                                                                                                                                                                                                                                                                                                                                                    | Supratech Micropath Diagnostics & Research laboratory Ahmedabad             | Gujarat Biotechnology Research Centre                                                             | Akhilesh Modi; Ameer Shukla; Apurvasinh Puvar; Bhadreshsinh Gohil; Chaitanya Joshi; Disha Vora; Janvi Raval; Jaykumar Rangani; Madhvi Joshi; Nimesh Patel; Nitin Savaliya; Nitin Shukla; Priyank Chavda; Ramesh Pandit; Roshani Mishra; Sonal Sharma; Tasnim Trivedi; Zarna Patel                                                                                                                                                                                                                                                                                                                                                                                                                                                                                                                                                                                                                                                                                                             |
| EPI_ISL_8388870,<br>EPI_ISL_8388871,<br>EPI_ISL_8388888,<br>EPI_ISL_8494336,<br>EPI_ISL_8494337                                                                                                                                                                                                                                                                                                                                                                                                                                                                                                                                                                                                                                                                                                                                                                                                                                                                                                                                                            | Supratech Micropath Laboratory Research Institute Pvt Ltd, Ahmedabad        | Gujarat Biotechnology Research Centre                                                             | Akhilesh Modi; Apurvasinh Puvar; Bhadreshsinh Gohil; Chaitanya Joshi; Disha Vora; Janvi Raval; Jaykumar Rangani; Madhvi Joshi; Nimesh Patel; Nitin Savaliya; Nitin Shukla; Priyank Chavda; Ramesh Pandit; Roshani Mishra; Sonal Sharma; Tasnim Trivedi; Zarna Patel                                                                                                                                                                                                                                                                                                                                                                                                                                                                                                                                                                                                                                                                                                                           |
| EPI_ISL_9023170                                                                                                                                                                                                                                                                                                                                                                                                                                                                                                                                                                                                                                                                                                                                                                                                                                                                                                                                                                                                                                            | Surat Municipal Institute of Medical Education and Research (SMIMER), Surat | Gujarat Biotechnology Research Centre                                                             | Akhilesh Modi; Apurvasinh Puvar; Bhadreshsinh Gohil; Chaitanya Joshi; Disha Vora; Janvi Raval; Jaykumar Rangani; Madhvi Joshi; Manish Patel; Nimesh Patel; Nitin Savaliya; NitinShukla; Priyank Chavda; Ramesh Pandit; Roshani Mishra; Sonal Sharma; Tasnim Trivedi; Zarna Patel                                                                                                                                                                                                                                                                                                                                                                                                                                                                                                                                                                                                                                                                                                              |
| EPI_ISL_8253125, EPI_ISL_8253135, EPI_ISL_8253154, EPI_ISL_8253171, EPI_ISL_8253179, EPI_ISL_8253190, EPI_ISL_8253192, EPI_ISL_8253203, EPI_ISL_8253256, EPI_ISL_8253261, EPI_ISL_8253270, EPI_ISL_8253275, EPI_ISL_8253295, EPI_ISL_8312121, EPI_ISL_8312174, EPI_ISL_8312220, EPI_ISL_8312244, EPI_ISL_8312297, EPI_ISL_8312359, EPI_ISL_8381751, EPI_ISL_8381758, EPI_ISL_8381767, EPI_ISL_8381790, EPI_ISL_8381797, EPI_ISL_8381844, EPI_ISL_8381847, EPI_ISL_8381849, EPI_ISL_8381850, EPI_ISL_8381856, EPI_ISL_8381858, EPI_ISL_8381864, EPI_ISL_8381881, EPI_ISL_8381908, EPI_ISL_8381905, EPI_ISL_8381910, EPI_ISL_8381919, EPI_ISL_8381921, EPI_ISL_8381935, EPI_ISL_8381946, EPI_ISL_8381950, EPI_ISL_8381984, EPI_ISL_8381986, EPI_ISL_8381989, EPI_ISL_8382008, EPI_ISL_8382011, EPI_ISL_8382031, EPI_ISL_8382060                                                                                                                                                                                                                              | see above                                                                   | Sweden, Vastragotaland, Unilabs                                                                   |                                                                                                                                                                                                                                                                                                                                                                                                                                                                                                                                                                                                                                                                                                                                                                                                                                                                                                                                                                                               |
| EPI_ISL_8744222,<br>EPI_ISL_8744223                                                                                                                                                                                                                                                                                                                                                                                                                                                                                                                                                                                                                                                                                                                                                                                                                                                                                                                                                                                                                        | Symmrs Path Care, Bopal                                                     | Gujarat Biotechnology Research Centre                                                             | Akhilesh Modi; Apurvasinh Puvar; Bhadreshsinh Gohil; Chaitanya Joshi; Disha Vora; Janvi Raval; Jaykumar Rangani; Madhvi Joshi; Nimesh Patel; Nitin Savaliya; NitinShukla; Priyank Chavda; Ramesh Pandit; Roshani Mishra; Sonal Sharma; Tasnim Trivedi; Umang Gandhi; Zarna Patel                                                                                                                                                                                                                                                                                                                                                                                                                                                                                                                                                                                                                                                                                                              |
| EPI_ISL_9649709,<br>EPI_ISL_9649790                                                                                                                                                                                                                                                                                                                                                                                                                                                                                                                                                                                                                                                                                                                                                                                                                                                                                                                                                                                                                        | Synlab Eesti OÜ                                                             | 1. Laboratory of Communicable Diseases (Estonia); 2. Eurofins Genomics Europe Sequencing GmbH     | Abroi A.; Avi R.; Dotsenko L.; Epštejn J.; Hoidmets D.; Huik K.; Härma M.-A.; Jaanis E.; Kaarna K.; Kallas E.; Koppel I.; Kuzmin I.; Lahesaare A.; Lutsar I.; Metspalu M.; Milani L.; Naaber P.; Niglas H.; Oopkaug O.E.; Pauskar M.; Peterson H.; Päll T.; Ratnik K.; Raudvere U.; Reisberg T.; Sadikova O.; Sepp H.; Shablinskaja A.; Suja H.; Talas U.G.; Trussalu K.                                                                                                                                                                                                                                                                                                                                                                                                                                                                                                                                                                                                                      |
| EPI_ISL_8306714                                                                                                                                                                                                                                                                                                                                                                                                                                                                                                                                                                                                                                                                                                                                                                                                                                                                                                                                                                                                                                            | TATA IMG                                                                    | ILBS                                                                                              | Arjun Bhugra; Chhagan Bihari Sharma; Ekta Gupta; Pramod Gautam; Rahul Garg; Reshu Agarwal; Shiv Kumar Sarin; Urvinder Kaur; Varun Suroliya                                                                                                                                                                                                                                                                                                                                                                                                                                                                                                                                                                                                                                                                                                                                                                                                                                                    |
| EPI_ISL_9321034                                                                                                                                                                                                                                                                                                                                                                                                                                                                                                                                                                                                                                                                                                                                                                                                                                                                                                                                                                                                                                            | Thainakarin Hospital                                                        | National Institute of Health, Department of Medical Sciences, Ministry of Public Health, Thailand | Archawin Rojanawiwat; Natchaya Khadsang; Nuttida Thongpramol; Pakorn Pirontong; Pilaluk Okada; Sirkanda Wimol; Siripaporn Phuyugon; Sunthareeya Waicharoen; Suratchana Mitrat; Thanutsapa Thanadachakul                                                                                                                                                                                                                                                                                                                                                                                                                                                                                                                                                                                                                                                                                                                                                                                       |
| EPI_ISL_8497522                                                                                                                                                                                                                                                                                                                                                                                                                                                                                                                                                                                                                                                                                                                                                                                                                                                                                                                                                                                                                                            | Toprani Advanced Lab system, Vadodra                                        | Gujarat Biotechnology Research Centre                                                             | Akhilesh Modi; Apurvasinh Puvar; Bhadreshsinh Gohil; Chaitanya Joshi; Disha Vora; Janvi Raval; Jaykumar Rangani; Madhvi Joshi; Nimesh Patel; Nitin Savaliya; Nitin Shukla; Priyank Chavda; Ramesh Pandit; Roshani Mishra; Sonal Sharma; Tasnim Trivedi; Tushar Toprani; Zarna Patel                                                                                                                                                                                                                                                                                                                                                                                                                                                                                                                                                                                                                                                                                                           |
| EPI_ISL_8623080                                                                                                                                                                                                                                                                                                                                                                                                                                                                                                                                                                                                                                                                                                                                                                                                                                                                                                                                                                                                                                            | UAB Diagnostikos laboratorija                                               | Institute of Biotechnology, Life Sciences Center, Vilnius University                              | Albertas Timinskas; Alma Gedvilaitė; Danguole Ziogiene; Emilija Vasiliunaite; Milda Norkiene                                                                                                                                                                                                                                                                                                                                                                                                                                                                                                                                                                                                                                                                                                                                                                                                                                                                                                  |
| EPI_ISL_8565045,<br>EPI_ISL_8565052,<br>EPI_ISL_8565054,<br>EPI_ISL_8565055                                                                                                                                                                                                                                                                                                                                                                                                                                                                                                                                                                                                                                                                                                                                                                                                                                                                                                                                                                                | UNIPATH DIAGNOSTICS                                                         | ILBS                                                                                              | Arjun Bhugra; Chhagan Bihari Sharma; Ekta Gupta; Pramod Gautam; Rahul Garg; Reshu Agarwal; Shiv Kumar Sarin; Urvinder Kaur; Varun Suroliya                                                                                                                                                                                                                                                                                                                                                                                                                                                                                                                                                                                                                                                                                                                                                                                                                                                    |
| EPI_ISL_9323235, EPI_ISL_9323236, EPI_ISL_9323237, EPI_ISL_9323238, EPI_ISL_9323239, EPI_ISL_9323240, EPI_ISL_9323241, EPI_ISL_9323242, EPI_ISL_9323243, EPI_ISL_9323245, EPI_ISL_9323258, EPI_ISL_9323259, EPI_ISL_9323260, EPI_ISL_9323261, EPI_ISL_9323262, EPI_ISL_9323263, EPI_ISL_9323264, EPI_ISL_9323265, EPI_ISL_9323266, EPI_ISL_9323267, EPI_ISL_9323268, EPI_ISL_9323270, EPI_ISL_9323271, EPI_ISL_9323272, EPI_ISL_9323273, EPI_ISL_9323274, EPI_ISL_9323275, EPI_ISL_9323276, EPI_ISL_9323277, EPI_ISL_9323278, EPI_ISL_9323279, EPI_ISL_9323280, EPI_ISL_9323281, EPI_ISL_9323282, EPI_ISL_9323283, EPI_ISL_9323284, EPI_ISL_9323285, EPI_ISL_9323286, EPI_ISL_9323287, EPI_ISL_9323288, EPI_ISL_9323289, EPI_ISL_9323290, EPI_ISL_9323291, EPI_ISL_9323292, EPI_ISL_9323293, EPI_ISL_9323294, EPI_ISL_9323295, EPI_ISL_9323296, EPI_ISL_9323297, EPI_ISL_9323298, EPI_ISL_9323299, EPI_ISL_9323300, EPI_ISL_9323301, EPI_ISL_9323311, EPI_ISL_9323312, EPI_ISL_9323313, EPI_ISL_9323314, EPI_ISL_9323315, EPI_ISL_9323316, EPI_ISL_9323317 | see above                                                                   | UP-PGH                                                                                            | Philippine Genome Center                                                                                                                                                                                                                                                                                                                                                                                                                                                                                                                                                                                                                                                                                                                                                                                                                                                                                                                                                                      |
| EPI_ISL_8668103,<br>EPI_ISL_9108393                                                                                                                                                                                                                                                                                                                                                                                                                                                                                                                                                                                                                                                                                                                                                                                                                                                                                                                                                                                                                        | Uniklinikum Regensburg; Institut für klinische Mikrobiologie und Hygiene    | Robert Koch Institute                                                                             | Alethea R. de Guzman; Alyssa Joyce E. Telles; Angelica A. Garcia; Anna Ong-Lim; Benedict A. Maralit; Carlo M. Lapid; Celia Carlos; Cynthia P. Saloma; Devon Ray Pacial; Diomedes A. Cariño; Edsel Maurice Salvana; El King D. Morado; Elcid Aaron R. Pangilinan; Eva Maria Cutiongo-de la Paz; Francis A. Tablizo; Henrietta Marie Rodriguez; Jaime C. Montoya; Jan Michael C. Yap; Jarvin E. Nipales; Jo-Hannah S. Llamas; John Michael Egan; John Q. Wong; Johnny A. Ong; Joshua Gregor A. Dizon; Joshua Jose Endozo; Karol Sophia Agape R. Padilla; Kris P. Punayan; Kristina Patriz Dela Cruz; Lindsay Clare D.L. Carandang; Ma. Exanil Plantig; Marc Edsel C. Ayes; Maria Rosario Singh-Vergeire; Maria Sofia L. Yangzon; Marielle M. Gamboa; Marissa Alejandria; Niña Francesca Bustamante; Razel Nikka M. Hao; Renato Jacinto Q. Mantaring; Rianna Patricia S. Cruz; Rizel A. Medina; Shiela Mae M. Araiza; Yvonne Valerie Austria; Zipporah Mariebelle R. Enriquez; Zryel V. Mollejon |
| EPI_ISL_8885403                                                                                                                                                                                                                                                                                                                                                                                                                                                                                                                                                                                                                                                                                                                                                                                                                                                                                                                                                                                                                                            | Unipath Speciality Laboratory, Ahmedabad                                    | Gujarat Biotechnology Research Centre                                                             | Akhilesh Modi; Apurvasinh Puvar; Bhadreshsinh Gohil; Chaitanya Joshi; Disha Vora; Janvi Raval; Jaykumar Rangani; Jwalant Shah; Madhvi Joshi; Nimesh Patel; Nitin Savaliya; NitinShukla; Priyank Chavda; Ramesh Pandit; Roshani Mishra; Sonal Sharma; Tasnim Trivedi; Zarna Patel                                                                                                                                                                                                                                                                                                                                                                                                                                                                                                                                                                                                                                                                                                              |
| EPI_ISL_8744156,<br>EPI_ISL_8744164                                                                                                                                                                                                                                                                                                                                                                                                                                                                                                                                                                                                                                                                                                                                                                                                                                                                                                                                                                                                                        | Unipath Speciality Laboratory Limited, Ahmedabad                            | Gujarat Biotechnology Research Centre                                                             | Akhilesh Modi; Apurvasinh Puvar; Bhadreshsinh Gohil; Chaitanya Joshi; Disha Vora; Janvi Raval; Jaykumar Rangani; Jwalant Shah; Madhvi Joshi; Nimesh Patel; Nitin Savaliya; NitinShukla; Priyank Chavda; Ramesh Pandit; Roshani Mishra; Sonal Sharma; Tasnim Trivedi; Zarna Patel                                                                                                                                                                                                                                                                                                                                                                                                                                                                                                                                                                                                                                                                                                              |
| EPI_ISL_8885481                                                                                                                                                                                                                                                                                                                                                                                                                                                                                                                                                                                                                                                                                                                                                                                                                                                                                                                                                                                                                                            | Unipath Pathology Laboratory - Vadodra                                      | Gujarat Biotechnology Research Centre                                                             | Akhilesh Modi; Apurvasinh Puvar; Bhadreshsinh Gohil; Chaitanya Joshi; Disha Vora; Janvi Raval; Jaykumar Rangani; Madhvi Joshi; Nimesh Patel; Nitin Savaliya; Nitin Shukla; Priyank Chavda; Rakesh Shah; Ramesh Pandit; Roshani Mishra; Sonal Sharma; Tasnim Trivedi; Zarna Patel                                                                                                                                                                                                                                                                                                                                                                                                                                                                                                                                                                                                                                                                                                              |
| EPI_ISL_8252976                                                                                                                                                                                                                                                                                                                                                                                                                                                                                                                                                                                                                                                                                                                                                                                                                                                                                                                                                                                                                                            | University Hospital Ostrava                                                 | University Hospital Ostrava                                                                       | Chorzempa; Matějová; Špulerová                                                                                                                                                                                                                                                                                                                                                                                                                                                                                                                                                                                                                                                                                                                                                                                                                                                                                                                                                                |
| EPI_ISL_9323204, EPI_ISL_9323205, EPI_ISL_9323206, EPI_ISL_9323208, EPI_ISL_9323209, EPI_ISL_9323210, EPI_ISL_9323211, EPI_ISL_9323212, EPI_ISL_9323213, EPI_ISL_9323214, EPI_ISL_9323215, EPI_ISL_9323216, EPI_ISL_9323217, EPI_ISL_9323218, EPI_ISL_9323219, EPI_ISL_9323220, EPI_ISL_9323221, EPI_ISL_9323223, EPI_ISL_9323224, EPI_ISL_9323225, EPI_ISL_9323226, EPI_ISL_9323227, EPI_ISL_9323228                                                                                                                                                                                                                                                                                                                                                                                                                                                                                                                                                                                                                                                      | see above                                                                   | University Of The East Ramon Magsaysay Memorial Medical Center (UERM)                             | Philippine Genome Center                                                                                                                                                                                                                                                                                                                                                                                                                                                                                                                                                                                                                                                                                                                                                                                                                                                                                                                                                                      |
| EPI_ISL_8439683,<br>EPI_ISL_8616752,<br>EPI_ISL_8799246,<br>EPI_ISL_9201525,<br>EPI_ISL_9201530,<br>EPI_ISL_9401615                                                                                                                                                                                                                                                                                                                                                                                                                                                                                                                                                                                                                                                                                                                                                                                                                                                                                                                                        | VERMAAK                                                                     | National Institute for Communicable Diseases of the National Health Laboratory Service            | Alethea R. de Guzman; Alyssa Joyce E. Telles; Angelica A. Garcia; Anna Ong-Lim; Benedict A. Maralit; Carlo M. Lapid; Celia Carlos; Cynthia P. Saloma; Devon Ray Pacial; Diomedes A. Cariño; Edsel Maurice Salvana; El King D. Morado; Elcid Aaron R. Pangilinan; Eva Maria Cutiongo-de la Paz; Francis A. Tablizo; Henrietta Marie Rodriguez; Jaime C. Montoya; Jan Michael C. Yap; Jarvin E. Nipales; Jo-Hannah S. Llamas; John Michael Egan; John Q. Wong; Johnny A. Ong; Joshua Gregor A. Dizon; Joshua Jose Endozo; Karol Sophia Agape R. Padilla; Kris P. Punayan; Kristina Patriz Dela Cruz; Lindsay Clare D.L. Carandang; Ma. Exanil Plantig; Marc Edsel C. Ayes; Maria Rosario Singh-Vergeire; Maria Sofia L. Yangzon; Marielle M. Gamboa; Marissa Alejandria; Niña Francesca Bustamante; Razel Nikka M. Hao; Renato Jacinto Q. Mantaring; Rianna Patricia S. Cruz; Rizel A. Medina; Shiela Mae M. Araiza; Yvonne Valerie Austria; Zipporah Mariebelle R. Enriquez; Zryel V. Mollejon |
| EPI_ISL_8801363, EPI_ISL_8801364, EPI_ISL_8801365, EPI_ISL_8801367, EPI_ISL_8801368, EPI_ISL_8801369, EPI_ISL_8801370, EPI_ISL_8801371, EPI_ISL_8801372, EPI_ISL_8801374, EPI_ISL_8801375, EPI_ISL_8801376, EPI_ISL_8801377, EPI_ISL_8801378, EPI_ISL_8801379, EPI_ISL_8801380                                                                                                                                                                                                                                                                                                                                                                                                                                                                                                                                                                                                                                                                                                                                                                             | see above                                                                   | VRDL,GMC,PTA                                                                                      | NIV Influenza                                                                                                                                                                                                                                                                                                                                                                                                                                                                                                                                                                                                                                                                                                                                                                                                                                                                                                                                                                                 |
| EPI_ISL_9321449, EPI_ISL_9321452, EPI_ISL_9321455, EPI_ISL_9321458, EPI_ISL_9321460, EPI_ISL_9321463, EPI_ISL_9321465, EPI_ISL_9321468, EPI_ISL_9321472, EPI_ISL_9321474, EPI_ISL_9321476, EPI_ISL_9321482, EPI_ISL_9321484                                                                                                                                                                                                                                                                                                                                                                                                                                                                                                                                                                                                                                                                                                                                                                                                                                | see above                                                                   | VRDL,GMC,PTA                                                                                      | Dr.Rupinder Bakshi                                                                                                                                                                                                                                                                                                                                                                                                                                                                                                                                                                                                                                                                                                                                                                                                                                                                                                                                                                            |
| EPI_ISL_8439683,<br>EPI_ISL_8616752,<br>EPI_ISL_8799246,<br>EPI_ISL_9201525,<br>EPI_ISL_9201530,<br>EPI_ISL_9401615                                                                                                                                                                                                                                                                                                                                                                                                                                                                                                                                                                                                                                                                                                                                                                                                                                                                                                                                        | VERMAAK                                                                     | National Institute for Communicable Diseases of the National Health Laboratory Service            | Alethea R. de Guzman; Alyssa Joyce E. Telles; Angelica A. Garcia; Anna Ong-Lim; Benedict A. Maralit; Carlo M. Lapid; Celia Carlos; Cynthia P. Saloma; Devon Ray Pacial; Diomedes A. Cariño; Edsel Maurice Salvana; El King D. Morado; Elcid Aaron R. Pangilinan; Eva Maria Cutiongo-de la Paz; Francis A. Tablizo; Henrietta Marie Rodriguez; Jaime C. Montoya; Jan Michael C. Yap; Jarvin E. Nipales; Jo-Hannah S. Llamas; John Michael Egan; John Q. Wong; Johnny A. Ong; Joshua Gregor A. Dizon; Joshua Jose Endozo; Karol Sophia Agape R. Padilla; Kris P. Punayan; Kristina Patriz Dela Cruz; Lindsay Clare D.L. Carandang; Ma. Exanil Plantig; Marc Edsel C. Ayes; Maria Rosario Singh-Vergeire; Maria Sofia L. Yangzon; Marielle M. Gamboa; Marissa Alejandria; Niña Francesca Bustamante; Razel Nikka M. Hao; Renato Jacinto Q. Mantaring; Rianna Patricia S. Cruz; Rizel A. Medina; Shiela Mae M. Araiza; Yvonne Valerie Austria; Zipporah Mariebelle R. Enriquez; Zryel V. Mollejon |
| EPI_ISL_8801363, EPI_ISL_8801364, EPI_ISL_8801365, EPI_ISL_8801367, EPI_ISL_8801368, EPI_ISL_8801369, EPI_ISL_8801370, EPI_ISL_8801371, EPI_ISL_8801372, EPI_ISL_8801374, EPI_ISL_8801375, EPI_ISL_8801376, EPI_ISL_8801377, EPI_ISL_8801378, EPI_ISL_8801379, EPI_ISL_8801380                                                                                                                                                                                                                                                                                                                                                                                                                                                                                                                                                                                                                                                                                                                                                                             | see above                                                                   | VRDL,GMC,PTA                                                                                      | Dr.Rupinder Bakshi                                                                                                                                                                                                                                                                                                                                                                                                                                                                                                                                                                                                                                                                                                                                                                                                                                                                                                                                                                            |
| EPI_ISL_9321449, EPI_ISL_9321452, EPI_ISL_9321455, EPI_ISL_9321458, EPI_ISL_9321460, EPI_ISL_9321463, EPI_ISL_9321465, EPI_ISL_9321468, EPI_ISL_9321472, EPI_ISL_9321474, EPI_ISL_9321476, EPI_ISL_9321482, EPI_ISL_9321484                                                                                                                                                                                                                                                                                                                                                                                                                                                                                                                                                                                                                                                                                                                                                                                                                                | see above                                                                   | VRDL,GMC,PTA                                                                                      | Dr.Rupinder Bakshi                                                                                                                                                                                                                                                                                                                                                                                                                                                                                                                                                                                                                                                                                                                                                                                                                                                                                                                                                                            |

|                                                                                                                                                                                                                                                                                                                                                                                                                                                                                                                              |                                                                                              |                                                                                                                                              |                                                                                                                                                                                                                                                                                                                                                                                                                                                                                                                                                                                                                                                                                                                                                                                                                                                                                                                                                                                                |
|------------------------------------------------------------------------------------------------------------------------------------------------------------------------------------------------------------------------------------------------------------------------------------------------------------------------------------------------------------------------------------------------------------------------------------------------------------------------------------------------------------------------------|----------------------------------------------------------------------------------------------|----------------------------------------------------------------------------------------------------------------------------------------------|------------------------------------------------------------------------------------------------------------------------------------------------------------------------------------------------------------------------------------------------------------------------------------------------------------------------------------------------------------------------------------------------------------------------------------------------------------------------------------------------------------------------------------------------------------------------------------------------------------------------------------------------------------------------------------------------------------------------------------------------------------------------------------------------------------------------------------------------------------------------------------------------------------------------------------------------------------------------------------------------|
| see above                                                                                                                                                                                                                                                                                                                                                                                                                                                                                                                    | Valenzuela Hope Molecular Laboratory                                                         | Philippine Genome Center                                                                                                                     | Alethea R. de Guzman; Alyssa Joyce E. Telles; Angelica A. Garcia; Anna Ong-Lim; Benedict A. Maralit; Carlo M. Lapid; Celia Carlos; Cynthia P. Saloma; Devon Ray Pacial; Diomedes A. Cariño; Edsel Maurice Salvana; El King D. Morado; Elcid Aaron R. Pangilinan; Eva Maria Cutiongo-de la Paz; Francis A. Tablizo; Henrietta Marie Rodriguez; Jaime C. Montoya; Jan Michael C. Yap; Jarvin E. Nipales; Jo-Hannah S. Llamas; John Michael Egana; John Q. Wong; Johnny A. Ong; Joshua Gregor A. Dizon; Joshua Jose Endozo; Karol Sophia Agape R. Padilla; Kris P. Punayan; Kristina Patriz Dela Cruz; Lindsay Clare D.L. Carandang; Ma. Exanil Plantig; Marc Edsel C. Ayes; Maria Rosario Singh-Vergeire; Maria Sofia L. Yangzon; Marielle M. Gamboa; Marissa Alejandria; Niña Francesca Bustamante; Razel Nikka M. Hao; Renato Jacinto Q. Mantaring; Rianna Patricia S. Cruz; Rizel A. Medina; Shiela Mae M. Araiza; Yvonne Valerie Austria; Zipporah Mariebelle R. Enriquez; Zyrel V. Mollejon |
| EPI_ISL_8063296, EPI_ISL_8063438, EPI_ISL_8063583                                                                                                                                                                                                                                                                                                                                                                                                                                                                            | Vastragotland, Unilabs                                                                       | Unilabs, Eskilstuna                                                                                                                          | Emma Arvidsson                                                                                                                                                                                                                                                                                                                                                                                                                                                                                                                                                                                                                                                                                                                                                                                                                                                                                                                                                                                 |
| EPI_ISL_9226417, EPI_ISL_9227207                                                                                                                                                                                                                                                                                                                                                                                                                                                                                             | Vestfold Hospital, Toensberg, Department of Microbiology                                     | Norwegian Institute of Public Health, Department of Virology                                                                                 | Atiya R Ali; Debech Nadia; Engebretsen Serina Beate; Garcia Liorente Ignacio; Hilde Elshaug; Hilde Nordby Falkenhau; Hilde Vollan; Jon Bråte; Kamilla Heddeland Instefjord; Karoline Bragstad; Kathrine Stene-Johansen; Line Victoria Moen; Marie Paulsen Madsen; Olav Hungnes; Pedersen Benedikte Nevjen; Rasmus Riis Kopperud                                                                                                                                                                                                                                                                                                                                                                                                                                                                                                                                                                                                                                                                |
| EPI_ISL_9323321                                                                                                                                                                                                                                                                                                                                                                                                                                                                                                              | Vicente Sotto Memorial Medical Center (VSMCMC)                                               | Philippine Genome Center                                                                                                                     | Alethea R. de Guzman; Alyssa Joyce E. Telles; Angelica A. Garcia; Anna Ong-Lim; Benedict A. Maralit; Carlo M. Lapid; Celia Carlos; Cynthia P. Saloma; Devon Ray Pacial; Diomedes A. Cariño; Edsel Maurice Salvana; El King D. Morado; Elcid Aaron R. Pangilinan; Eva Maria Cutiongo-de la Paz; Francis A. Tablizo; Henrietta Marie Rodriguez; Jaime C. Montoya; Jan Michael C. Yap; Jarvin E. Nipales; Jo-Hannah S. Llamas; John Michael Egana; John Q. Wong; Johnny A. Ong; Joshua Gregor A. Dizon; Joshua Jose Endozo; Karol Sophia Agape R. Padilla; Kris P. Punayan; Kristina Patriz Dela Cruz; Lindsay Clare D.L. Carandang; Ma. Exanil Plantig; Marc Edsel C. Ayes; Maria Rosario Singh-Vergeire; Maria Sofia L. Yangzon; Marielle M. Gamboa; Marissa Alejandria; Niña Francesca Bustamante; Razel Nikka M. Hao; Renato Jacinto Q. Mantaring; Rianna Patricia S. Cruz; Rizel A. Medina; Shiela Mae M. Araiza; Yvonne Valerie Austria; Zipporah Mariebelle R. Enriquez; Zyrel V. Mollejon |
| EPI_ISL_9321447                                                                                                                                                                                                                                                                                                                                                                                                                                                                                                              | Victoriano Luna Medical Center - (AFIRMS)                                                    | Philippine Genome Center                                                                                                                     | Alethea R. de Guzman; Alyssa Joyce E. Telles; Angelica A. Garcia; Anna Ong-Lim; Benedict A. Maralit; Carlo M. Lapid; Celia Carlos; Cynthia P. Saloma; Devon Ray Pacial; Diomedes A. Cariño; Edsel Maurice Salvana; El King D. Morado; Elcid Aaron R. Pangilinan; Eva Maria Cutiongo-de la Paz; Francis A. Tablizo; Henrietta Marie Rodriguez; Jaime C. Montoya; Jan Michael C. Yap; Jarvin E. Nipales; Jo-Hannah S. Llamas; John Michael Egana; John Q. Wong; Johnny A. Ong; Joshua Gregor A. Dizon; Joshua Jose Endozo; Karol Sophia Agape R. Padilla; Kris P. Punayan; Kristina Patriz Dela Cruz; Lindsay Clare D.L. Carandang; Ma. Exanil Plantig; Marc Edsel C. Ayes; Maria Rosario Singh-Vergeire; Maria Sofia L. Yangzon; Marielle M. Gamboa; Marissa Alejandria; Niña Francesca Bustamante; Razel Nikka M. Hao; Renato Jacinto Q. Mantaring; Rianna Patricia S. Cruz; Rizel A. Medina; Shiela Mae M. Araiza; Yvonne Valerie Austria; Zipporah Mariebelle R. Enriquez; Zyrel V. Mollejon |
| EPI_ISL_8349474, EPI_ISL_8790235                                                                                                                                                                                                                                                                                                                                                                                                                                                                                             | Viollier AG                                                                                  | Department of Biosystems Science and Engineering, ETH Zürich                                                                                 | Andrea Patrizia Salzmänn; Chaoran Chen; Christian Beisel; Christiane Beckmann; Christoph Noppen; David Dreiffuss; Elodie Burcklen; Franziska Singer; Henriette Kurth; Ina Nissen; Ivan Topolsky; Kim Philipp Jablonski; Lara Fuhrmann; Louis du Plessis; Matteo Carrara; Maurice Redondo; Mirjam Feldkamp; Natascha Santacrose; Niko Beerenwinkel; Olivier Kobel; Peilin Icer; Rebecca Denes; Sarah Nadeau; Shuqing Yu; Tanja Stadler; Tobias Schär                                                                                                                                                                                                                                                                                                                                                                                                                                                                                                                                            |
| EPI_ISL_9457955, EPI_ISL_9457958, EPI_ISL_9457959, EPI_ISL_9457960, EPI_ISL_9457961, EPI_ISL_9457963, EPI_ISL_9457964, EPI_ISL_9457965, EPI_ISL_9457966, EPI_ISL_9457967, EPI_ISL_9457968, EPI_ISL_9457969, EPI_ISL_9457971, EPI_ISL_9457972, EPI_ISL_9457973, EPI_ISL_9457974, EPI_ISL_9457975, EPI_ISL_9457976, EPI_ISL_9457977, EPI_ISL_9457978, EPI_ISL_9457979, EPI_ISL_9457980, EPI_ISL_9457981, EPI_ISL_9457982, EPI_ISL_9457983, EPI_ISL_9457984, EPI_ISL_9457985, EPI_ISL_9457987, EPI_ISL_9457989, EPI_ISL_9457990 |                                                                                              | Dr.Rupinder Bakshi                                                                                                                           |                                                                                                                                                                                                                                                                                                                                                                                                                                                                                                                                                                                                                                                                                                                                                                                                                                                                                                                                                                                                |
| see above                                                                                                                                                                                                                                                                                                                                                                                                                                                                                                                    | Virus Research and Diagnostic Laboratory                                                     | NIV Influenza                                                                                                                                |                                                                                                                                                                                                                                                                                                                                                                                                                                                                                                                                                                                                                                                                                                                                                                                                                                                                                                                                                                                                |
| EPI_ISL_8885422, EPI_ISL_8885423                                                                                                                                                                                                                                                                                                                                                                                                                                                                                             | We Path Genexplore Laboratory, Vadodara                                                      | Gujarat Biotechnology Research Centre                                                                                                        | Akhilesh Modi; Apurvasinh Puvar; Bhadrshreshinh Gohil; Chaitanya Joshi; Disha Vora; Janvi Raval; Jaykumar Rangani; Madhvi Joshi; Nimesh Patel; Nitin Savaliya; NitinShukla; Priyank Chavda; Ramesh Pandit; Roshani Mishra; Sonal Sharma; Tasnim Trivedi; Twinkle Dhamecha; Zarna Patel                                                                                                                                                                                                                                                                                                                                                                                                                                                                                                                                                                                                                                                                                                         |
| EPI_ISL_6795834, EPI_ISL_8128463, EPI_ISL_8128502, EPI_ISL_8636460, EPI_ISL_8636462, EPI_ISL_8636482, EPI_ISL_8636484, EPI_ISL_8636500, EPI_ISL_9423049, EPI_ISL_9423050, EPI_ISL_9423051, EPI_ISL_9423052, EPI_ISL_9423080, EPI_ISL_9423098                                                                                                                                                                                                                                                                                 |                                                                                              |                                                                                                                                              |                                                                                                                                                                                                                                                                                                                                                                                                                                                                                                                                                                                                                                                                                                                                                                                                                                                                                                                                                                                                |
| see above                                                                                                                                                                                                                                                                                                                                                                                                                                                                                                                    | ZARV/NHLS, Department Medical Virology, University of Pretoria                               | CERI, Centre for Epidemic Response and Innovation, Stellenbosch University and KRISP, KZN Research Innovation and Sequencing Platform, UKZN. | Adriano Mendes; Amoaka D. Amy Strydom; Anyanaji Uj; Arisha Mahara; Bester P. Bhiman J; Engelbrecht S; Everatt J; Giandhari J; Goedhals D; Hardie D; Hsiao M; Iranzadeh A; Lessells R; Maharaj A; Makatini Z; Maponga T; Mdalose N; Micheala Davids; Mlisana K; Moir M; NGS-SA (Scheepers C; Naicker D; Naidoo Y; Nyaga M) Giandhari J; Oluwakemi M; Pillay S; Preiser W; Ramphal U; Ramphal Y; San JE; Sim Mayaphi and Mariettej Venter; Tegally H; Tshiabula D; Van Wyk S; Venter M; Wilkinson E; Williamson C; de Oliveira T; von Gottberg A                                                                                                                                                                                                                                                                                                                                                                                                                                                 |
| EPI_ISL_8480536                                                                                                                                                                                                                                                                                                                                                                                                                                                                                                              | ZOTZ KLIMAS MVZ Düsseldorf-Centrum GbR ÜBAG für Labormedizin, Genetik, Zytologie, Pathologie | Center of Medical Microbiology, Virology, and Hospital Hygiene, University of Duesseldorf                                                    | Alexander Dilthey; Andreas Walker; Daniel Strelow; Jessica Nicolai; Jörg Timm; Katrin Hoffmann; Klaus Pfeffer; Lisanna Hülse; Malte Kohns Vasconcelos; Maximilian Damagnez; Nadine Lübke; Patrick Finzer; Rainer Zotz; Tobias Wienemann; Torsten Houwaart                                                                                                                                                                                                                                                                                                                                                                                                                                                                                                                                                                                                                                                                                                                                      |
| EPI_ISL_8885391, EPI_ISL_8885416, EPI_ISL_8885480                                                                                                                                                                                                                                                                                                                                                                                                                                                                            | Zydus Hospital & Healthcare Research Pvt. Ltd.                                               | Gujarat Biotechnology Research Centre                                                                                                        | Akhilesh Modi; Apurvasinh Puvar; Bhadrshreshinh Gohil; Chaitanya Joshi; Disha Vora; Janvi Raval; Jayesh Trivedi; Jaykumar Rangani; Jaymin Patel; Madhvi Joshi; Nimesh Patel; Nitin Savaliya; Nitin Shukla; NitinShukla; Priyank Chavda; Ramesh Pandit; Roshani Mishra; Sonal Sharma; Tasnim Trivedi; Zarna Patel                                                                                                                                                                                                                                                                                                                                                                                                                                                                                                                                                                                                                                                                               |

We gratefully acknowledge the following Authors from the Originating laboratories responsible for obtaining the specimens, as well as the Submitting laboratories where the genome data were generated and shared via GISAID, on which this research is based.

All Submitters of data may be contacted directly via [www.gisaid.org](http://www.gisaid.org)

Authors are sorted alphabetically.

| Accession ID                                                                                                                                                                                                                                                                                                                                                                                                                                                                                                                                                                                                                                                                                                                                                                                                                                                                                                                                         | Originating Laboratory                                                                   | Submitting Laboratory                                                                                                                                    | Authors                                                                                                                                                                                                                                                                                                                                                                                                                                                                                                                                                                                                                                                                                                                                                                                                                                                                                                                                                                                           |
|------------------------------------------------------------------------------------------------------------------------------------------------------------------------------------------------------------------------------------------------------------------------------------------------------------------------------------------------------------------------------------------------------------------------------------------------------------------------------------------------------------------------------------------------------------------------------------------------------------------------------------------------------------------------------------------------------------------------------------------------------------------------------------------------------------------------------------------------------------------------------------------------------------------------------------------------------|------------------------------------------------------------------------------------------|----------------------------------------------------------------------------------------------------------------------------------------------------------|---------------------------------------------------------------------------------------------------------------------------------------------------------------------------------------------------------------------------------------------------------------------------------------------------------------------------------------------------------------------------------------------------------------------------------------------------------------------------------------------------------------------------------------------------------------------------------------------------------------------------------------------------------------------------------------------------------------------------------------------------------------------------------------------------------------------------------------------------------------------------------------------------------------------------------------------------------------------------------------------------|
| EPI_ISL_9366625, EPI_ISL_9366627, EPI_ISL_9366628, EPI_ISL_9366633, EPI_ISL_9366644, EPI_ISL_9366648, EPI_ISL_9366649, EPI_ISL_9366650, EPI_ISL_9366654, EPI_ISL_9366664, EPI_ISL_9366668, EPI_ISL_9366670, EPI_ISL_9366672, EPI_ISL_9366720, EPI_ISL_9366722, EPI_ISL_9366729, EPI_ISL_9366731, EPI_ISL_9366732, EPI_ISL_9366733, EPI_ISL_9366734, EPI_ISL_9366735, EPI_ISL_9366736, EPI_ISL_9366741, EPI_ISL_9366745, EPI_ISL_9366747, EPI_ISL_9366753, EPI_ISL_9429925, EPI_ISL_9430049, EPI_ISL_9430050, EPI_ISL_9430051                                                                                                                                                                                                                                                                                                                                                                                                                         | "CBR,IISC"                                                                               | CBR,IISC                                                                                                                                                 | "Bratati Kahali"                                                                                                                                                                                                                                                                                                                                                                                                                                                                                                                                                                                                                                                                                                                                                                                                                                                                                                                                                                                  |
| see above                                                                                                                                                                                                                                                                                                                                                                                                                                                                                                                                                                                                                                                                                                                                                                                                                                                                                                                                            |                                                                                          |                                                                                                                                                          | J r mie Gras; Pascale Hilbert                                                                                                                                                                                                                                                                                                                                                                                                                                                                                                                                                                                                                                                                                                                                                                                                                                                                                                                                                                     |
| EPI_ISL_8926290                                                                                                                                                                                                                                                                                                                                                                                                                                                                                                                                                                                                                                                                                                                                                                                                                                                                                                                                      | 212 CHAUSSEE DE NIVELLES(CLINIQUE N-D DE GRACE)SERVICE DES URGENCES                      | Institut de Pathologie et Genetique (IPG)                                                                                                                |                                                                                                                                                                                                                                                                                                                                                                                                                                                                                                                                                                                                                                                                                                                                                                                                                                                                                                                                                                                                   |
| EPI_ISL_9232044, EPI_ISL_9232046, EPI_ISL_9232047, EPI_ISL_9232048, EPI_ISL_9232160, EPI_ISL_9728925, EPI_ISL_9728968, EPI_ISL_9728974, EPI_ISL_9729104, EPI_ISL_9729107, EPI_ISL_9729109, EPI_ISL_9729110, EPI_ISL_9729113, EPI_ISL_9729124, EPI_ISL_9729129                                                                                                                                                                                                                                                                                                                                                                                                                                                                                                                                                                                                                                                                                        | AP SSO                                                                                   | CSIR-Centre for Cellular and Molecular Biology-INSACOG                                                                                                   | Amreshwar Vodapalli; Ara Sreenivas; Archana Bharadwaj Siva; B Himasri; Divya Tej Sowpati; Janhalya Sai Krishna; Karthik Bharadwaj Tallapaka; Lamuk Zaveri; Malini Nemalikanti; Priya Nurkuthry; Rakesh K Mishra; Shreekant Verma; Sreelekshmi MS; Smedha Avadhanula; Surabhi Srivastava; Tulasi Nagabandi; Valli Nagalakshmi Undamatla; Vidhyadhari Methuku                                                                                                                                                                                                                                                                                                                                                                                                                                                                                                                                                                                                                                       |
| EPI_ISL_9791878, EPI_ISL_9791879                                                                                                                                                                                                                                                                                                                                                                                                                                                                                                                                                                                                                                                                                                                                                                                                                                                                                                                     | ARION GENETICA                                                                           | Instituto Nacional de Medicina Genomica                                                                                                                  | Cedro-Tanda A; Escobar-Arrazola MA; Garnica-Lopez Dora; Herrera-Montalvo LA.; Hidalgo-Miranda A.; Mendoza-Vargas A.; Ramirez-Vega O.; Rangel-DeLeon D.; Reyes-Grajeda JP; Roldan-Castillo Magaly; Uribe-Figueroa Laura; Vereza Jazmin; Yair Alfaro-Mora                                                                                                                                                                                                                                                                                                                                                                                                                                                                                                                                                                                                                                                                                                                                           |
| EPI_ISL_8780436, EPI_ISL_9003410                                                                                                                                                                                                                                                                                                                                                                                                                                                                                                                                                                                                                                                                                                                                                                                                                                                                                                                     | ARS Algarve - Laboratorio Laura Ayres                                                    | Instituto Nacional de Saude (INSA)                                                                                                                       | Borges et al                                                                                                                                                                                                                                                                                                                                                                                                                                                                                                                                                                                                                                                                                                                                                                                                                                                                                                                                                                                      |
| EPI_ISL_8688470, EPI_ISL_8688474, EPI_ISL_8688485, EPI_ISL_8688486, EPI_ISL_8688488, EPI_ISL_8688489, EPI_ISL_8688490, EPI_ISL_8688495, EPI_ISL_8688496, EPI_ISL_8688497, EPI_ISL_8688509, EPI_ISL_8688532                                                                                                                                                                                                                                                                                                                                                                                                                                                                                                                                                                                                                                                                                                                                           | AZDelta                                                                                  | AZ Delta Medical Laboratories in Roeselare, Belgium                                                                                                      | Dieter De Smet; Frederik Van Hoeck; Geert Martens; on behalf of AZ Delta COVID-19 Genomics core (member of Genomic surveillance of SARS-CoV-2 in Belgium network)                                                                                                                                                                                                                                                                                                                                                                                                                                                                                                                                                                                                                                                                                                                                                                                                                                 |
| see above                                                                                                                                                                                                                                                                                                                                                                                                                                                                                                                                                                                                                                                                                                                                                                                                                                                                                                                                            |                                                                                          |                                                                                                                                                          |                                                                                                                                                                                                                                                                                                                                                                                                                                                                                                                                                                                                                                                                                                                                                                                                                                                                                                                                                                                                   |
| EPI_ISL_9047015, EPI_ISL_9485368                                                                                                                                                                                                                                                                                                                                                                                                                                                                                                                                                                                                                                                                                                                                                                                                                                                                                                                     | Aegis Sciences Corporation                                                               | Centers for Disease Control and Prevention Division of Viral Diseases, Pathogen Discovery                                                                | Alec Vest; Benjamin Rambo-Martin; Christopher Gulvick; Clinton Paden; Cyndi Clark; Dakota Howard; Dhvani Batra; Dillon Nall; Duncan MacCannell; Erisa Sula; Ethan Sanders; Holly Houdeshell; Jason Caravas; Kristine Lacek; Matthew Hardison; Matthew Schmerer; Ola Kvalvaag; Patrick Campbell; Peter Cook; Rob Case; Scott Sammons; Shatavia Morrison; Shaun Westlund; Tymecia Kendall; Victoria Caban Figueroa; Vikramsinhha Ghorpade; Yvette Unoarunhi                                                                                                                                                                                                                                                                                                                                                                                                                                                                                                                                         |
| EPI_ISL_9460799, EPI_ISL_9460800                                                                                                                                                                                                                                                                                                                                                                                                                                                                                                                                                                                                                                                                                                                                                                                                                                                                                                                     | Akershus University Hospital, Department for Microbiology and Infectious Disease Control | Norwegian Institute of Public Health, Department of Virology                                                                                             | Atiya R Ali; Debec Nadia; Engebretsen Serina Beate; Garcia Llorente Ignacio; Hilde Elshaug; Hilde Nordby Falkenhaus; Hilde Volla; Jon Br te; Kamilla Heddeland Inestfjord; Karoline Braagstad; Kathrine Stene-Johansen; Line Victoria Moen; Marie Paulsen Madsen; Olav Hungnes; Pedersen Benedikte Nevjn; Rasmus Riis Kopper                                                                                                                                                                                                                                                                                                                                                                                                                                                                                                                                                                                                                                                                      |
| EPI_ISL_9488436                                                                                                                                                                                                                                                                                                                                                                                                                                                                                                                                                                                                                                                                                                                                                                                                                                                                                                                                      | Alaska State Virology Laboratory                                                         | Alaska State Virology Laboratory                                                                                                                         | Jack Chen; Jacob Zidek; Jeremy Roe; Lisa Smith; Ph.D.                                                                                                                                                                                                                                                                                                                                                                                                                                                                                                                                                                                                                                                                                                                                                                                                                                                                                                                                             |
| EPI_ISL_8769446, EPI_ISL_8769470, EPI_ISL_8769480, EPI_ISL_8769485, EPI_ISL_8769488, EPI_ISL_8769489, EPI_ISL_8769490, EPI_ISL_8769500, EPI_ISL_8769503, EPI_ISL_8769518, EPI_ISL_8769521, EPI_ISL_8769531, EPI_ISL_8769535, EPI_ISL_8769540, EPI_ISL_8769544, EPI_ISL_8769545, EPI_ISL_8769547                                                                                                                                                                                                                                                                                                                                                                                                                                                                                                                                                                                                                                                      | Allergy, Immunology and Cell Biology Unit (AICBU)                                        | Allergy, Immunology and Cell Biology Unit (AICBU)                                                                                                        | Aysha Wijesinghe; Chandima Jeewandara; Deshni Jayathilaka; Dinuka Ariyaratne; Diyanath Ranasinghe; Dumni Guasinghe; Farha Bary; Gathsaurie Neelika Malavige; Heshan Kuruppu; Tibutius Thanesh                                                                                                                                                                                                                                                                                                                                                                                                                                                                                                                                                                                                                                                                                                                                                                                                     |
| see above                                                                                                                                                                                                                                                                                                                                                                                                                                                                                                                                                                                                                                                                                                                                                                                                                                                                                                                                            |                                                                                          |                                                                                                                                                          |                                                                                                                                                                                                                                                                                                                                                                                                                                                                                                                                                                                                                                                                                                                                                                                                                                                                                                                                                                                                   |
| EPI_ISL_9322827, EPI_ISL_9322829, EPI_ISL_9322832                                                                                                                                                                                                                                                                                                                                                                                                                                                                                                                                                                                                                                                                                                                                                                                                                                                                                                    | Allied Care Expert - Valenzuela                                                          | Philippine Genome Center                                                                                                                                 | Alethea R. de Guzman; Alyssa Joyce E. Telles; Angelica A. Garcia; Anna Ong-Lim; Benedict A. Maralit; Carlo M. Lapid; Celia Carlos; Cynthia P. Saloma; Devon Ray Pacial; Diomedes A. Cari o; Edsel Maurice Salvana; El King D. Morado; Elcid Aaron R. Pangiliinan; Eva Maria Cutiungco-de la Paz; Francis A. Tablizo; Henrietta Marie Rodr guez; Jaime C. Montoya; Jan Michael C. Yap; Jarvin E. Nipales; Jo-Hannah S. Llamas; John Michael Egana; John Q. Wong; Johnny A. Ong; Joshua Gregor A. Dizon; Joshua Jose Endozo; Karol Sophia Agape R. Padilla; Kris P. Punayan; Kristina Patriz Dela Cruz; Lindsay Clare D. L. Carandang; Ma. Exanil Plantig; Marc Edsel C. Ayes; Maria Rosario Singh-Vergeire; Maria Sofia L. Yangzon; Marielle M. Gamboa; Marissa Alejandria; Ni a Francesca Bustamante; Razel Nikka M. Hao; Renato Jacinto Q. Mantaring; Rianna Patricia S. Cruz; Rizel A. Medina; Shiela Mae M. Araiza; Yvonne Valerie Austria; Zipporah Mariebelle R. Enriquez; Zryel V. Molejjon |
| EPI_ISL_9324448                                                                                                                                                                                                                                                                                                                                                                                                                                                                                                                                                                                                                                                                                                                                                                                                                                                                                                                                      | Amang Rodriguez Memorial Medical Center                                                  | Philippine Genome Center                                                                                                                                 | Alethea R. de Guzman; Alyssa Joyce E. Telles; Angelica A. Garcia; Anna Ong-Lim; Benedict A. Maralit; Carlo M. Lapid; Celia Carlos; Cynthia P. Saloma; Devon Ray Pacial; Diomedes A. Cari o; Edsel Maurice Salvana; El King D. Morado; Elcid Aaron R. Pangiliinan; Eva Maria Cutiungco-de la Paz; Francis A. Tablizo; Henrietta Marie Rodr guez; Jaime C. Montoya; Jan Michael C. Yap; Jarvin E. Nipales; Jo-Hannah S. Llamas; John Michael Egana; John Q. Wong; Johnny A. Ong; Joshua Gregor A. Dizon; Joshua Jose Endozo; Karol Sophia Agape R. Padilla; Kris P. Punayan; Kristina Patriz Dela Cruz; Lindsay Clare D. L. Carandang; Ma. Exanil Plantig; Marc Edsel C. Ayes; Maria Rosario Singh-Vergeire; Maria Sofia L. Yangzon; Marielle M. Gamboa; Marissa Alejandria; Ni a Francesca Bustamante; Razel Nikka M. Hao; Renato Jacinto Q. Mantaring; Rianna Patricia S. Cruz; Rizel A. Medina; Shiela Mae M. Araiza; Yvonne Valerie Austria; Zipporah Mariebelle R. Enriquez; Zryel V. Molejjon |
| EPI_ISL_9323424, EPI_ISL_9323425, EPI_ISL_9323427, EPI_ISL_9323428, EPI_ISL_9323430, EPI_ISL_9323431, EPI_ISL_9323433, EPI_ISL_9323434, EPI_ISL_9323435, EPI_ISL_9323436, EPI_ISL_9323437, EPI_ISL_9323438, EPI_ISL_9323469                                                                                                                                                                                                                                                                                                                                                                                                                                                                                                                                                                                                                                                                                                                          | Amosup Seaman's Hospital                                                                 | Philippine Genome Center                                                                                                                                 | Alethea R. de Guzman; Alyssa Joyce E. Telles; Angelica A. Garcia; Anna Ong-Lim; Benedict A. Maralit; Carlo M. Lapid; Celia Carlos; Cynthia P. Saloma; Devon Ray Pacial; Diomedes A. Cari o; Edsel Maurice Salvana; El King D. Morado; Elcid Aaron R. Pangiliinan; Eva Maria Cutiungco-de la Paz; Francis A. Tablizo; Henrietta Marie Rodr guez; Jaime C. Montoya; Jan Michael C. Yap; Jarvin E. Nipales; Jo-Hannah S. Llamas; John Michael Egana; John Q. Wong; Johnny A. Ong; Joshua Gregor A. Dizon; Joshua Jose Endozo; Karol Sophia Agape R. Padilla; Kris P. Punayan; Kristina Patriz Dela Cruz; Lindsay Clare D. L. Carandang; Ma. Exanil Plantig; Marc Edsel C. Ayes; Maria Rosario Singh-Vergeire; Maria Sofia L. Yangzon; Marielle M. Gamboa; Marissa Alejandria; Ni a Francesca Bustamante; Razel Nikka M. Hao; Renato Jacinto Q. Mantaring; Rianna Patricia S. Cruz; Rizel A. Medina; Shiela Mae M. Araiza; Yvonne Valerie Austria; Zipporah Mariebelle R. Enriquez; Zryel V. Molejjon |
| see above                                                                                                                                                                                                                                                                                                                                                                                                                                                                                                                                                                                                                                                                                                                                                                                                                                                                                                                                            |                                                                                          |                                                                                                                                                          |                                                                                                                                                                                                                                                                                                                                                                                                                                                                                                                                                                                                                                                                                                                                                                                                                                                                                                                                                                                                   |
| EPI_ISL_9234053                                                                                                                                                                                                                                                                                                                                                                                                                                                                                                                                                                                                                                                                                                                                                                                                                                                                                                                                      | AmpliGene laboratory, Ahmedabad                                                          | Gujarat Biotechnology Research Centre                                                                                                                    | Akhilesh Modi; Apurvasinh Puvar; Bhadrshsinh Gohli; Chaitanya Joshi; Chirag Pandya; Disha Vora; Janvi Ravai; Jaykumar Rangani; Madhvi Joshi; Nimesh Patel; Nitin Savaliya; NitinShukla; Priyank Chavda; Ramesh Pandit; Roshani Mishra; Sonal Sharma; Tasnim Trivedi; Zarna Patel                                                                                                                                                                                                                                                                                                                                                                                                                                                                                                                                                                                                                                                                                                                  |
| EPI_ISL_9233984, EPI_ISL_9234063, EPI_ISL_9234064                                                                                                                                                                                                                                                                                                                                                                                                                                                                                                                                                                                                                                                                                                                                                                                                                                                                                                    | Apollo Hospital International Limited, Ahmedabad                                         | Gujarat Biotechnology Research Centre                                                                                                                    | Akhilesh Modi; Apurvasinh Puvar; Bhadrshsinh Gohli; Chaitanya Joshi; Disha Vora; Janvi Ravai; Jaykumar Rangani; Madhvi Joshi; Nimesh Patel; Nitin Savaliya; NitinShukla; Pankti Shah; Priyank Chavda; Ramesh Pandit; Roshani Mishra; Sonal Sharma; Tasnim Trivedi; Zarna Patel                                                                                                                                                                                                                                                                                                                                                                                                                                                                                                                                                                                                                                                                                                                    |
| EPI_ISL_8508994, EPI_ISL_8687113, EPI_ISL_8732977, EPI_ISL_8732978, EPI_ISL_8732979, EPI_ISL_8732980, EPI_ISL_8732981, EPI_ISL_8732982, EPI_ISL_8745252, EPI_ISL_8745342, EPI_ISL_8745348, EPI_ISL_8745453                                                                                                                                                                                                                                                                                                                                                                                                                                                                                                                                                                                                                                                                                                                                           | Arizona State University                                                                 | Arizona State University                                                                                                                                 | Efrem S. Lim; James C. Hu; Joshua LaBaer; LaRinda A. Holland; Matthew F. Smith; Nathaniel Johnson; Regan A. Sullins; Steven C. Holland; Vel Murugan                                                                                                                                                                                                                                                                                                                                                                                                                                                                                                                                                                                                                                                                                                                                                                                                                                               |
| see above                                                                                                                                                                                                                                                                                                                                                                                                                                                                                                                                                                                                                                                                                                                                                                                                                                                                                                                                            |                                                                                          |                                                                                                                                                          |                                                                                                                                                                                                                                                                                                                                                                                                                                                                                                                                                                                                                                                                                                                                                                                                                                                                                                                                                                                                   |
| EPI_ISL_9092481, EPI_ISL_9092485, EPI_ISL_9092492, EPI_ISL_9092495, EPI_ISL_9092497, EPI_ISL_9092499, EPI_ISL_9092500, EPI_ISL_9092502, EPI_ISL_9092503, EPI_ISL_9092506, EPI_ISL_9092507, EPI_ISL_9092508, EPI_ISL_9092510                                                                                                                                                                                                                                                                                                                                                                                                                                                                                                                                                                                                                                                                                                                          | Auriga Research Pvt Ltd, Laboratory, Bengaluru                                           | National Center for Biological Sciences, TIFR - Rockefeller Foundation                                                                                   | Awadhesh Pandit; Bhagyashree Madhav Shelar; Darshan Sreenivas; Dimple Notani; Kathirvel Kandasamy; Lakshminarayanan CP; Satyajit Mayor; Uma Ramakrishnan                                                                                                                                                                                                                                                                                                                                                                                                                                                                                                                                                                                                                                                                                                                                                                                                                                          |
| see above                                                                                                                                                                                                                                                                                                                                                                                                                                                                                                                                                                                                                                                                                                                                                                                                                                                                                                                                            |                                                                                          |                                                                                                                                                          |                                                                                                                                                                                                                                                                                                                                                                                                                                                                                                                                                                                                                                                                                                                                                                                                                                                                                                                                                                                                   |
| EPI_ISL_9459538, EPI_ISL_9459539, EPI_ISL_9459707, EPI_ISL_9459715, EPI_ISL_9459845, EPI_ISL_9626851, EPI_ISL_9626852, EPI_ISL_9626853, EPI_ISL_9626854, EPI_ISL_9626982, EPI_ISL_9626983, EPI_ISL_9626990, EPI_ISL_9626994, EPI_ISL_9626997                                                                                                                                                                                                                                                                                                                                                                                                                                                                                                                                                                                                                                                                                                         | Austrian Agency for Health and Food Safety (AGES)                                        | Bergthaler laboratory, CeMM Research Center for Molecular Medicine of the Austrian Academy of Sciences                                                   | Andreas Bergthaler; Anna Schedl; Bekir Erguner; Benedikt Agerer; Christoph Bock; Fabian Amman; Jan Laine; Lukas Endler; Martin Senekowitsch; Matthew Thornton; Michael Schuster; Michelle Chan; Petr Triska; Thomas Penz                                                                                                                                                                                                                                                                                                                                                                                                                                                                                                                                                                                                                                                                                                                                                                          |
| see above                                                                                                                                                                                                                                                                                                                                                                                                                                                                                                                                                                                                                                                                                                                                                                                                                                                                                                                                            |                                                                                          |                                                                                                                                                          |                                                                                                                                                                                                                                                                                                                                                                                                                                                                                                                                                                                                                                                                                                                                                                                                                                                                                                                                                                                                   |
| EPI_ISL_9090866, EPI_ISL_9090867, EPI_ISL_9090869, EPI_ISL_9090870, EPI_ISL_9090872, EPI_ISL_9090873, EPI_ISL_9090874, EPI_ISL_9090876, EPI_ISL_9090878, EPI_ISL_9090879, EPI_ISL_9090880, EPI_ISL_9090883, EPI_ISL_9090884, EPI_ISL_9090885, EPI_ISL_9090886, EPI_ISL_9090888, EPI_ISL_9090889, EPI_ISL_9090890, EPI_ISL_9090891, EPI_ISL_9090892, EPI_ISL_9090893, EPI_ISL_9090895, EPI_ISL_9090896, EPI_ISL_9090897, EPI_ISL_9090898, EPI_ISL_9090899, EPI_ISL_9090900, EPI_ISL_9090902, EPI_ISL_9090903, EPI_ISL_9090904, EPI_ISL_9090906, EPI_ISL_9090907, EPI_ISL_9090908, EPI_ISL_9090909, EPI_ISL_9090910, EPI_ISL_9090911, EPI_ISL_9090912, EPI_ISL_9090914, EPI_ISL_9090915, EPI_ISL_9090916, EPI_ISL_9090917, EPI_ISL_9090918, EPI_ISL_9090919, EPI_ISL_9090920, EPI_ISL_9090921, EPI_ISL_9090922, EPI_ISL_9090924, EPI_ISL_9091145, EPI_ISL_9091157, EPI_ISL_9091158, EPI_ISL_9091159, EPI_ISL_9091162, EPI_ISL_9091171, EPI_ISL_9091173 | National Center for Biological Sciences, TIFR - Rockefeller Foundation                   | Awadhesh Pandit; Bhagyashree Madhav Shelar; Darshan Sreenivas; Dimple Notani; Kathirvel Kandasamy; Lakshminarayanan CP; Satyajit Mayor; Uma Ramakrishnan |                                                                                                                                                                                                                                                                                                                                                                                                                                                                                                                                                                                                                                                                                                                                                                                                                                                                                                                                                                                                   |
| see above                                                                                                                                                                                                                                                                                                                                                                                                                                                                                                                                                                                                                                                                                                                                                                                                                                                                                                                                            |                                                                                          |                                                                                                                                                          |                                                                                                                                                                                                                                                                                                                                                                                                                                                                                                                                                                                                                                                                                                                                                                                                                                                                                                                                                                                                   |
| EPI_ISL_9176001, EPI_ISL_9176002                                                                                                                                                                                                                                                                                                                                                                                                                                                                                                                                                                                                                                                                                                                                                                                                                                                                                                                     | BBMP- Mahadevapura                                                                       | inStem, NCBS-INSACOG                                                                                                                                     | Aswin SaiNarain; Dasaradhi Palakodeti; Uma Ramakrishnan                                                                                                                                                                                                                                                                                                                                                                                                                                                                                                                                                                                                                                                                                                                                                                                                                                                                                                                                           |
| EPI_ISL_9175930, EPI_ISL_9175937, EPI_ISL_9175939, EPI_ISL_9176037, EPI_ISL_9176039, EPI_ISL_9176044, EPI_ISL_9176045, EPI_ISL_9176046                                                                                                                                                                                                                                                                                                                                                                                                                                                                                                                                                                                                                                                                                                                                                                                                               | BBMP- West                                                                               | inStem, NCBS-INSACOG                                                                                                                                     | Aswin SaiNarain; Dasaradhi Palakodeti; Uma Ramakrishnan                                                                                                                                                                                                                                                                                                                                                                                                                                                                                                                                                                                                                                                                                                                                                                                                                                                                                                                                           |
| see above                                                                                                                                                                                                                                                                                                                                                                                                                                                                                                                                                                                                                                                                                                                                                                                                                                                                                                                                            |                                                                                          |                                                                                                                                                          |                                                                                                                                                                                                                                                                                                                                                                                                                                                                                                                                                                                                                                                                                                                                                                                                                                                                                                                                                                                                   |
| EPI_ISL_9175916, EPI_ISL_9175920, EPI_ISL_9175922, EPI_ISL_9175923, EPI_ISL_9175924, EPI_ISL_9175927                                                                                                                                                                                                                                                                                                                                                                                                                                                                                                                                                                                                                                                                                                                                                                                                                                                 | BBMP- Yelahanka                                                                          | inStem, NCBS-INSACOG                                                                                                                                     | Aswin SaiNarain; Dasaradhi Palakodeti; Uma Ramakrishnan                                                                                                                                                                                                                                                                                                                                                                                                                                                                                                                                                                                                                                                                                                                                                                                                                                                                                                                                           |
| EPI_ISL_9176003, EPI_ISL_9176005, EPI_ISL_9176007, EPI_ISL_9176008, EPI_ISL_9176009, EPI_ISL_9176010, EPI_ISL_9176011, EPI_ISL_9176012, EPI_ISL_9176018, EPI_ISL_9176019, EPI_ISL_9176020, EPI_ISL_9176021                                                                                                                                                                                                                                                                                                                                                                                                                                                                                                                                                                                                                                                                                                                                           | BBMP-Dasarahalli                                                                         | inStem, NCBS-INSACOG                                                                                                                                     | Aswin SaiNarain; Dasaradhi Palakodeti; Uma Ramakrishnan                                                                                                                                                                                                                                                                                                                                                                                                                                                                                                                                                                                                                                                                                                                                                                                                                                                                                                                                           |
| see above                                                                                                                                                                                                                                                                                                                                                                                                                                                                                                                                                                                                                                                                                                                                                                                                                                                                                                                                            |                                                                                          |                                                                                                                                                          |                                                                                                                                                                                                                                                                                                                                                                                                                                                                                                                                                                                                                                                                                                                                                                                                                                                                                                                                                                                                   |
| EPI_ISL_9732672                                                                                                                                                                                                                                                                                                                                                                                                                                                                                                                                                                                                                                                                                                                                                                                                                                                                                                                                      | BITD, Chattogram                                                                         | Virology Laboratory, International Centre for Diarrhoeal Disease Research, Bangladesh (ICDDR,B)                                                          | ASM Alamgir; Ahmed Nawsher Alam; Araf Mahmud; Dinesh Mondal; Firdausi Qadri; Hassan Afrad; Mahbubur Rahman; Manjur Hossain Khan; Md. Mahfuzur Rahman; Mohammad Enayet Hossain; Mohammad Jubair; Mohammad Shahidul Islam; Mohammed Ziaur Rahman; Moju Miah; Mustafizur Rahman; Razib Mazumder; Samir Kumar Saha; Senjuti Saha; Shakeel Ahmed; Shovan Basak Moon; Tahmina Shirin                                                                                                                                                                                                                                                                                                                                                                                                                                                                                                                                                                                                                    |
| EPI_ISL_8885409, EPI_ISL_8885504, EPI_ISL_8885505, EPI_ISL_8885508, EPI_ISL_8885523, EPI_ISL_8885525, EPI_ISL_9023154, EPI_ISL_9023207, EPI_ISL_9023232, EPI_ISL_9234035, EPI_ISL_9234051                                                                                                                                                                                                                                                                                                                                                                                                                                                                                                                                                                                                                                                                                                                                                            | BJ Medical College, Ahmedabad                                                            | Gujarat Biotechnology Research Centre                                                                                                                    | Akhilesh Modi; Apurvasinh Puvar; Bhadrshsinh Gohli; Chaitanya Joshi; Disha Vora; Janvi Ravai; Jaykumar Rangani; Madhvi Joshi; Nimesh Patel; Nitin Savaliya; Nitin Shukla; NitinShukla; Priyank Chavda; Ramesh Pandit; Roshani Mishra; Sonal Sharma; Sumita Soni; Tasnim Trivedi; Zarna Patel                                                                                                                                                                                                                                                                                                                                                                                                                                                                                                                                                                                                                                                                                                      |
| see above                                                                                                                                                                                                                                                                                                                                                                                                                                                                                                                                                                                                                                                                                                                                                                                                                                                                                                                                            |                                                                                          |                                                                                                                                                          |                                                                                                                                                                                                                                                                                                                                                                                                                                                                                                                                                                                                                                                                                                                                                                                                                                                                                                                                                                                                   |
| EPI_ISL_9697365, EPI_ISL_9697456, EPI_ISL_9697457                                                                                                                                                                                                                                                                                                                                                                                                                                                                                                                                                                                                                                                                                                                                                                                                                                                                                                    | BJMC                                                                                     | RF-IISER Pune                                                                                                                                            | Aurnab Ghose; Joy Merwin Monteiro; Krishanpal Karmodiya; Rajesh Karyakarte; Suvama Joshi                                                                                                                                                                                                                                                                                                                                                                                                                                                                                                                                                                                                                                                                                                                                                                                                                                                                                                          |
| EPI_ISL_9234805, EPI_ISL_9234806, EPI_ISL_9234807, EPI_ISL_9234808, EPI_ISL_9234809, EPI_ISL_9234812, EPI_ISL_9234813, EPI_ISL_9234814, EPI_ISL_9234815, EPI_ISL_9234816, EPI_ISL_9234817, EPI_ISL_9234818, EPI_ISL_9234819, EPI_ISL_9234820, EPI_ISL_9234821, EPI_ISL_9234822, EPI_ISL_9234823, EPI_ISL_9234825, EPI_ISL_9234826, EPI_ISL_9234827, EPI_ISL_9234828, EPI_ISL_9234830, EPI_ISL_9234831, EPI_ISL_9234832, EPI_ISL_9234833, EPI_ISL_9234834, EPI_ISL_9234835, EPI_ISL_9234836                                                                                                                                                                                                                                                                                                                                                                                                                                                           | BPGHTC, Pasighat                                                                         | Centre for Infectious Diseases, CSIR-NEIST                                                                                                               | G Narahari Sastry; Gayatri Gogoi; Jatin Kalita; Moirangthem G Singh; Munmi Bora; Pankaj Bharali; Romi Wahengbam; Yasmin B Tapaddar                                                                                                                                                                                                                                                                                                                                                                                                                                                                                                                                                                                                                                                                                                                                                                                                                                                                |
| see above                                                                                                                                                                                                                                                                                                                                                                                                                                                                                                                                                                                                                                                                                                                                                                                                                                                                                                                                            |                                                                                          |                                                                                                                                                          |                                                                                                                                                                                                                                                                                                                                                                                                                                                                                                                                                                                                                                                                                                                                                                                                                                                                                                                                                                                                   |



EPI\_ISL\_9323411, EPI\_ISL\_9323413, EPI\_ISL\_9323414, EPI\_ISL\_9324493, EPI\_ISL\_9324494, EPI\_ISL\_9324495, EPI\_ISL\_9324497, EPI\_ISL\_9324502, EPI\_ISL\_9324503

|                                                                                                      |                                                                                                           |                                                                                                                                                                                                                   |                                                                                                                                                                                                                                                                                                                                                                                                                                                                                                                                                                                                                                                                                                                                                                                                                                                                                                                                                                        |
|------------------------------------------------------------------------------------------------------|-----------------------------------------------------------------------------------------------------------|-------------------------------------------------------------------------------------------------------------------------------------------------------------------------------------------------------------------|------------------------------------------------------------------------------------------------------------------------------------------------------------------------------------------------------------------------------------------------------------------------------------------------------------------------------------------------------------------------------------------------------------------------------------------------------------------------------------------------------------------------------------------------------------------------------------------------------------------------------------------------------------------------------------------------------------------------------------------------------------------------------------------------------------------------------------------------------------------------------------------------------------------------------------------------------------------------|
| see above                                                                                            | Cebu TB Reference Laboratory                                                                              | Philippine Genome Center                                                                                                                                                                                          | Alethea R. de Guzman; Alyssa Joyce E. Telles; Angelica A. Garcia; Anna Ong-Lim; Benedict A. Maralit; Carlo M. Lapid; Celia Carlos; Cynthia P. Saloma; Devon Ray Pacial; Diomedes A. Cariño; Edsel Maurice Salvana; El King D. Morado; Elcid Aaron R. Pangilinan; Eva Maria Cutiungco-de la Paz; Francis A. Tablizo; Henrietta Marie Rodriguez; Jaime C. Montoya; Jan Michael C. Yap; Jarvin E. Nipales; Jo-Hannah S. Llames; John Michael Egana; John O. Wong; Johnny A. Ong; Joshua Jose Endozo; Karol Sophia Agape R. Padilla; Kris P. Punayan; Kristina Patriz Dela Cruz; Lindsay Clare D.L. Carandang; Ma. Exanal Plantig; Marc Edsel C. Ayes; Maria Rosario Singh-Vergeire; Maria Sofia L. Yangzon; Marielle M. Gamba; Marissa Alejandria; Niña Francesca Bustamante; Razel Nikka M. Hao; Renato Jacinto Q. Mantaring; Rianna Patricia S. Cruz; Rizel A. Medina; Shiela Mae M. Araiza; Yvonne Valerie Austria; Zipporah Mariebelle R. Enriquez; Zyrrel V. Mollejo |
| EPI_ISL_8799693, EPI_ISL_8799706, EPI_ISL_8799971                                                    | Cell-T Sp. z o.o.                                                                                         | 1. Tricity SARS-CoV-2 sequencing consortium: University of Gdansk, Medical University of Gdansk, Vaxian Ltd., Invicta Ltd. 2. National Institute of Public Health - National Institute of Hygiene, Warsaw, Poland | Celina Cybulska; Karolina Gackowska; Katarzyna Groth; Katarzyna Zacharczuk; Krystyna Bienkowska Szewczyk; Lukasz Rabalski; Maciej Grzybek; Maciej Kosinski; Magdalena Nowakowska; Marcin Lubocki; Małgorzata Sadkowska-Tody; Tomasz Wolkowicz                                                                                                                                                                                                                                                                                                                                                                                                                                                                                                                                                                                                                                                                                                                          |
| EPI_ISL_9233994, EPI_ISL_9234036, EPI_ISL_9234065, EPI_ISL_9234066, EPI_ISL_9234067, EPI_ISL_9604362 | Cellcare Patholab, Ahmedabad                                                                              | Gujarat Biotechnology Research Centre                                                                                                                                                                             | Akhilesh Modi; Apurvasinh Puvar; Bhadrshsinh Gohil; Chaitanya Joshi; Dhyanesh Desai; Disha Vora; Janvi Ravai; Jaykumar Rangani; Madhvi Joshi; Nimesh Patel; Nitin Savaliya; NitinShukla; Priyank Chavda; Ramesh Pandit; Roshani Mishra; Sonal Sharma; Tasnim Trivedi; Zarna Patel                                                                                                                                                                                                                                                                                                                                                                                                                                                                                                                                                                                                                                                                                      |
| EPI_ISL_9229991, EPI_ISL_9229994                                                                     | Centre Hospitalier Eure Seine                                                                             | Centre Hospitalier Universitaire de Rouen<br>Laboratoire de Virologie                                                                                                                                             | Alice Moisan; Fabienne De Oliveira; Marie Leoz                                                                                                                                                                                                                                                                                                                                                                                                                                                                                                                                                                                                                                                                                                                                                                                                                                                                                                                         |
| EPI_ISL_9125803, EPI_ISL_9229992                                                                     | Centre Hospitalier Universitaire de Rouen                                                                 | Centre Hospitalier Universitaire de Rouen<br>Laboratoire de Virologie                                                                                                                                             | Alice Moisan; Fabienne De Oliveira; Marie Leoz                                                                                                                                                                                                                                                                                                                                                                                                                                                                                                                                                                                                                                                                                                                                                                                                                                                                                                                         |
| EPI_ISL_8753902                                                                                      | Centrum Medycznej Diagnostyki Laboratoryjnej i Badan Przesiewowych Instytut Centrum Zdrowia Matki Polki   | Wojewodzka Stacja Sanitarno-Epidemiologiczna w Lodzi, Oddzial Laboratoryjny Mikrobiologii i Parazytologii                                                                                                         | Agneszka Karnowska; Aleksandra Krawczyk; Danuta Bartczak; Elian Terpo; Katarzyna Kosowska; Lucyna Kochanowska; Marta Gawronska; Martyna Matera; Szymon Konkolewski                                                                                                                                                                                                                                                                                                                                                                                                                                                                                                                                                                                                                                                                                                                                                                                                     |
| EPI_ISL_9704139                                                                                      | Centrālā Laboratorija                                                                                     | Riga East University Hospital, National Microbiology Reference Laboratory; Eurofins Genomics Europe Sequencing GmbH                                                                                               | Anastasija Žuravļova; Arzu Algulieva; Diāna Dušacka; Dārta Pūpola; Ilva Pole; Jana Osīte; Jevgenijs Bodrenko; Jūlija Čevere; Kristīne Liepiņa; Oksana Savicka; Reinis Vangravs; Reinis Zeltmatis; Sergejs Nikišins; Stella Lapīna; Girts Skenders                                                                                                                                                                                                                                                                                                                                                                                                                                                                                                                                                                                                                                                                                                                      |
| EPI_ISL_9224043, EPI_ISL_9224046, EPI_ISL_9224087                                                    | Chiba Prefectural Institute of Public Health                                                              | Division of Virology and Zoology, Chiba Prefectural Institute of Public Health                                                                                                                                    | Akihiro Takemura; Kentaro Itokawa; Makoto Kuroda; Mari Ohta; Masanori Hashino; Mika Takeuchi; Rina Tanaka; Shigenori Sato; Tsuyoshi Sekizuka; Yuji Hanada; Yuki Fujinuma                                                                                                                                                                                                                                                                                                                                                                                                                                                                                                                                                                                                                                                                                                                                                                                               |
| EPI_ISL_9594533, EPI_ISL_9594553                                                                     | Child Health Research Foundation                                                                          | Child Health Research Foundation                                                                                                                                                                                  | ASM Alamgir; Ahmed Nawsher Alam; CHRFB Bangladesh Genomics Team; Dinesh Mondal; Firdausi Qadri; Hassan Afrad; Mahbubur Rahman; Manjur Hossain Khan; Mohammad Enayet Hossain; Mohammad Jubair; Mohammad Shahidul Islam; Mohammed Ziaur Rahman; Mustafizur Rahman; Razib Mazumder; Samir Kumar Saha; Senjuti Saha; Tahmina Shirin                                                                                                                                                                                                                                                                                                                                                                                                                                                                                                                                                                                                                                        |
| EPI_ISL_8879805, EPI_ISL_8879809                                                                     | Chittagong General Hospital/ Disease Research Lab, University of Chittagong/ Dalhousie University, Canada | Virology Laboratory, International Centre for Diarrhoeal Disease Research, Bangladesh (ICDDR,B)                                                                                                                   | Abdullah Mahmud-Al-Rafat; Adnan Mannan; David J Kelvin; Fahim Hasan Reza; H. M. Hamidullah Mehedi; Md. Abdur Rob; Md. Minhazul Hoque; Mohammad Enayet Hossain; Moju Miah; Mustafizur Rahman; Rajdeep Biswas; Rashedul Hasan                                                                                                                                                                                                                                                                                                                                                                                                                                                                                                                                                                                                                                                                                                                                            |
| EPI_ISL_9107514, EPI_ISL_9107516, EPI_ISL_9107525                                                    | Clemenshospital - Alexianer Clemenshospital Münster                                                       | Robert Koch Institute                                                                                                                                                                                             |                                                                                                                                                                                                                                                                                                                                                                                                                                                                                                                                                                                                                                                                                                                                                                                                                                                                                                                                                                        |

EPI\_ISL\_8519453, EPI\_ISL\_8519493, EPI\_ISL\_8610124, EPI\_ISL\_8610173, EPI\_ISL\_8610234, EPI\_ISL\_8610277, EPI\_ISL\_8610308, EPI\_ISL\_8610326, EPI\_ISL\_8716477, EPI\_ISL\_8987467, EPI\_ISL\_8987738, EPI\_ISL\_8988061, EPI\_ISL\_8988066

|                                                                                                                                                                                                                                                                                                                                                                                                                                                                                                                                                                                                                                                                                                                                                                                                                                                                                                                                                                                                                                                                                                                                                                                                                                                                                                                                                                                                                                                                                                                                                                                                                                                                                                                                                   |                                                                    |                                                                                           |                                                                                                                                                                                                                                                                                                            |
|---------------------------------------------------------------------------------------------------------------------------------------------------------------------------------------------------------------------------------------------------------------------------------------------------------------------------------------------------------------------------------------------------------------------------------------------------------------------------------------------------------------------------------------------------------------------------------------------------------------------------------------------------------------------------------------------------------------------------------------------------------------------------------------------------------------------------------------------------------------------------------------------------------------------------------------------------------------------------------------------------------------------------------------------------------------------------------------------------------------------------------------------------------------------------------------------------------------------------------------------------------------------------------------------------------------------------------------------------------------------------------------------------------------------------------------------------------------------------------------------------------------------------------------------------------------------------------------------------------------------------------------------------------------------------------------------------------------------------------------------------|--------------------------------------------------------------------|-------------------------------------------------------------------------------------------|------------------------------------------------------------------------------------------------------------------------------------------------------------------------------------------------------------------------------------------------------------------------------------------------------------|
| see above                                                                                                                                                                                                                                                                                                                                                                                                                                                                                                                                                                                                                                                                                                                                                                                                                                                                                                                                                                                                                                                                                                                                                                                                                                                                                                                                                                                                                                                                                                                                                                                                                                                                                                                                         | Clinical Microbiology Laboratory, Tel Aviv Sourasky Medical Center | Clinical Microbiology Laboratory, Tel Aviv Sourasky Medical Center                        | Alon Ziv; Amos Adler; Goel Morad; Katya Levvitskyi; Lior Handler; Matan Slutskin; Ora Halutz                                                                                                                                                                                                               |
| EPI_ISL_8539044, EPI_ISL_8770043, EPI_ISL_8770044, EPI_ISL_8770060, EPI_ISL_8770064, EPI_ISL_8770072, EPI_ISL_8770076, EPI_ISL_8770081, EPI_ISL_8770084, EPI_ISL_8770092, EPI_ISL_8770094, EPI_ISL_8770111, EPI_ISL_8770114, EPI_ISL_8770117, EPI_ISL_8770119, EPI_ISL_8770124, EPI_ISL_8770125, EPI_ISL_8770126, EPI_ISL_8770134, EPI_ISL_8770142, EPI_ISL_8770150, EPI_ISL_8770153, EPI_ISL_8770162, EPI_ISL_8770179, EPI_ISL_8770188, EPI_ISL_8770179, EPI_ISL_8770217, EPI_ISL_8770219, EPI_ISL_8770213, EPI_ISL_8770232, EPI_ISL_8770240, EPI_ISL_8770245, EPI_ISL_8770256, EPI_ISL_8770261, EPI_ISL_8770262, EPI_ISL_8770266, EPI_ISL_8770273, EPI_ISL_8770279, EPI_ISL_8770290, EPI_ISL_8770295, EPI_ISL_8770300, EPI_ISL_8770313, EPI_ISL_8770319, EPI_ISL_8770321, EPI_ISL_8770325, EPI_ISL_8770326, EPI_ISL_8770327, EPI_ISL_8770330, EPI_ISL_8770343, EPI_ISL_8770345, EPI_ISL_8770349, EPI_ISL_8770363, EPI_ISL_8770366, EPI_ISL_8770342, EPI_ISL_8770345, EPI_ISL_8770349, EPI_ISL_9240637, EPI_ISL_9240703, EPI_ISL_9240736, EPI_ISL_9240824, EPI_ISL_9241459, EPI_ISL_9241471, EPI_ISL_9241497, EPI_ISL_9241506, EPI_ISL_9241520, EPI_ISL_9241526, EPI_ISL_9241536, EPI_ISL_9241566, EPI_ISL_9241742, EPI_ISL_9241685, EPI_ISL_9241697, EPI_ISL_9241742, EPI_ISL_9241756, EPI_ISL_9241769, EPI_ISL_9241770, EPI_ISL_9241784, EPI_ISL_9241791, EPI_ISL_9240807, EPI_ISL_9240897, EPI_ISL_9241855, EPI_ISL_9241862, EPI_ISL_9241880, EPI_ISL_9241891, EPI_ISL_9241896, EPI_ISL_9241907, EPI_ISL_9241931, EPI_ISL_9241947, EPI_ISL_9241959, EPI_ISL_9241963, EPI_ISL_9241964, EPI_ISL_9241965, EPI_ISL_9241966, EPI_ISL_9241968, EPI_ISL_9241968, EPI_ISL_9242007, EPI_ISL_9242025, EPI_ISL_9242040, EPI_ISL_9242051, EPI_ISL_9242062 | Björn Hallström; Jonas Björkman                                    |                                                                                           |                                                                                                                                                                                                                                                                                                            |
| see above                                                                                                                                                                                                                                                                                                                                                                                                                                                                                                                                                                                                                                                                                                                                                                                                                                                                                                                                                                                                                                                                                                                                                                                                                                                                                                                                                                                                                                                                                                                                                                                                                                                                                                                                         | Clinical Microbiology, Infection Prevention and Control            | Section for Molecular Diagnostics                                                         |                                                                                                                                                                                                                                                                                                            |
| EPI_ISL_9435378                                                                                                                                                                                                                                                                                                                                                                                                                                                                                                                                                                                                                                                                                                                                                                                                                                                                                                                                                                                                                                                                                                                                                                                                                                                                                                                                                                                                                                                                                                                                                                                                                                                                                                                                   | Commonwealth Healthcare Center                                     | Centers for Disease Control and Prevention Division of Viral Diseases, Pathogen Discovery | Alex Burgin; Ben Rambo-Martin; Clinton Paden; Dakota Howard; Dave Wentworth; Dhwanji Batra; Jasmine Padilla; Joseph Madden; Justin Lee; Kristen Knipe; Kristine Lacek; Mark Burroughs; Matthew Schimerer; Meghan Bentz; Miili Sheth; Peter Cook; Sam Shepard; Sarah Nobles; Vivien Dugan; Yvette Unoarumhi |

|                                                                                                                                                                                           |                                                          |                                                  |                                                                                                                                                                                                                                                                                                                                                                                                                                                                                                                                                                                                                                                                                                                                                                                                                                                                                                                                                                        |
|-------------------------------------------------------------------------------------------------------------------------------------------------------------------------------------------|----------------------------------------------------------|--------------------------------------------------|------------------------------------------------------------------------------------------------------------------------------------------------------------------------------------------------------------------------------------------------------------------------------------------------------------------------------------------------------------------------------------------------------------------------------------------------------------------------------------------------------------------------------------------------------------------------------------------------------------------------------------------------------------------------------------------------------------------------------------------------------------------------------------------------------------------------------------------------------------------------------------------------------------------------------------------------------------------------|
| EPI_ISL_9107578, EPI_ISL_9107579, EPI_ISL_9107580, EPI_ISL_9107581, EPI_ISL_9107582, EPI_ISL_9107583, EPI_ISL_9107584, EPI_ISL_9107585, EPI_ISL_9107586, EPI_ISL_9107587, EPI_ISL_9107588 | Corona-Testzentrum ifp Institut für Produktqualität GmbH | Robert Koch Institute                            |                                                                                                                                                                                                                                                                                                                                                                                                                                                                                                                                                                                                                                                                                                                                                                                                                                                                                                                                                                        |
| EPI_ISL_9596151                                                                                                                                                                           | Cox's Bazar Medical College, Cox's bazar                 | IEDCR-icddr.b                                    | ASM Alamgir; Ahmed Nawsher Alam; Anupam Barua; Awlad Hossain; Dinesh Mondal; Firdausi Qadri; Hassan Afrad; Mahbubur Rahman; Manjur Hossain Khan; Md. Mahfuzur Rahman; Mohammad Enayet Hossain; Mohammad Jubair; Mohammad Shahidul Islam; Mohammed Ziaur Rahman; Moju Miah; Mustafizur Rahman; Rashedul Hasan; Razib Mazumder; Saiful Alam Shanto; Samir Kumar Saha; Senjuti Saha; Syed Muktedir Al Sium; Tahmina Shirin                                                                                                                                                                                                                                                                                                                                                                                                                                                                                                                                                |
| EPI_ISL_8976725, EPI_ISL_9160836                                                                                                                                                          | Curative Labs                                            | Curative Labs                                    | Elias L. Salfati; Eugenia Khoroosheva; George Way; J.Cesar Ignacio-Espinoza; Janet Chen; Mikhail Hanewich-Hollatz; Nabjot Sandhu; Sophia Quasem; Vladimir Slepnev; Zhiyi Xie                                                                                                                                                                                                                                                                                                                                                                                                                                                                                                                                                                                                                                                                                                                                                                                           |
| EPI_ISL_9549346                                                                                                                                                                           | DOHMH Chelsea                                            | New York City Public Health Laboratory           | Jade Wang; et al.                                                                                                                                                                                                                                                                                                                                                                                                                                                                                                                                                                                                                                                                                                                                                                                                                                                                                                                                                      |
| EPI_ISL_8920494, EPI_ISL_8920501                                                                                                                                                          | DSMRC                                                    | Defence Services Medical Research Centre (DSMRC) | Aung Sitt Hmue; Khine Zaw Oo; Ko Ko Lwin; Ko Ko Lwin; Kyaw Zaw Lin; Kye Myint; Zaw Myo Lwin; Zaw Win Htun                                                                                                                                                                                                                                                                                                                                                                                                                                                                                                                                                                                                                                                                                                                                                                                                                                                              |
| EPI_ISL_9323229, EPI_ISL_9323230, EPI_ISL_9323231                                                                                                                                         | Davao Doctors Hospital                                   | Philippine Genome Center                         | Alethea R. de Guzman; Alyssa Joyce E. Telles; Angelica A. Garcia; Anna Ong-Lim; Benedict A. Maralit; Carlo M. Lapid; Celia Carlos; Cynthia P. Saloma; Devon Ray Pacial; Diomedes A. Cariño; Edsel Maurice Salvana; El King D. Morado; Elcid Aaron R. Pangilinan; Eva Maria Cutiungco-de la Paz; Francis A. Tablizo; Henrietta Marie Rodriguez; Jaime C. Montoya; Jan Michael C. Yap; Jarvin E. Nipales; Jo-Hannah S. Llames; John Michael Egana; John O. Wong; Johnny A. Ong; Joshua Jose Endozo; Karol Sophia Agape R. Padilla; Kris P. Punayan; Kristina Patriz Dela Cruz; Lindsay Clare D.L. Carandang; Ma. Exanal Plantig; Marc Edsel C. Ayes; Maria Rosario Singh-Vergeire; Maria Sofia L. Yangzon; Marielle M. Gamba; Marissa Alejandria; Niña Francesca Bustamante; Razel Nikka M. Hao; Renato Jacinto Q. Mantaring; Rianna Patricia S. Cruz; Rizel A. Medina; Shiela Mae M. Araiza; Yvonne Valerie Austria; Zipporah Mariebelle R. Enriquez; Zyrrel V. Mollejo |

|                                                                                                      |                                                                                                                                                                                         |                                                                                                                                                                                         |                                                                                                                                                                                                                                                                                                                                                                                                                                                                                                                                                                                                    |
|------------------------------------------------------------------------------------------------------|-----------------------------------------------------------------------------------------------------------------------------------------------------------------------------------------|-----------------------------------------------------------------------------------------------------------------------------------------------------------------------------------------|----------------------------------------------------------------------------------------------------------------------------------------------------------------------------------------------------------------------------------------------------------------------------------------------------------------------------------------------------------------------------------------------------------------------------------------------------------------------------------------------------------------------------------------------------------------------------------------------------|
| EPI_ISL_9227202, EPI_ISL_9253365, EPI_ISL_9253366, EPI_ISL_9253367, EPI_ISL_9480294, EPI_ISL_9480589 | Department Medical Microbiology, Baerum Hospital, Vestre Viken Health Trust                                                                                                             | Norwegian Institute of Public Health, Department of Virology                                                                                                                            | Atiya R Ali; Debehc Nadia; Engebretsen Serina Beate; Garcia Llorente Ignacio; Hilde Elshaug; Hilde Nordby Falkenau; Hilde Volla; Jon Bråte; Kamilla Heddeland Instefjord; Karoline Bragstad; Kathrine Stene-Johansen; Line Victoria Moen; Marie Paulsen Madsen; Olav Hungenes; Pedersen Benedikte Nevjen; Rasmus Riis Kopperud                                                                                                                                                                                                                                                                     |
| EPI_ISL_8878778                                                                                      | Department for Virology, Molecular Biology and Genome Research, R. G. Lugar Center for Public Health Research, National Center for Disease Control and Public Health (NCDC) of Georgia. | Department for Virology, Molecular Biology and Genome Research, R. G. Lugar Center for Public Health Research, National Center for Disease Control and Public Health (NCDC) of Georgia. | Adam Kotorashvili; Amiran Gamkrelidze.; Ana Pakkiauri; Ann Machablishvili; Anna Kasradze; Davit Tsaguria; Ekaterine Khmaladze; Ekaterine Zangaladze; Ekaterine Zhgenti; Giorgi Gogoladze; Giorgi Tomashvili; Gvantsa Brachveli; Gvantsa Chanturia; Irma Burjanadze; Ketevan Sidamondze; Khatuna Zakhashvili; Lela Sabadze; Lela Urushadze; Magda Dgebuadze; Maia Alkhashvili; Mari Gavashelidze; Mariam Zakalashvili; Marine Murtshkvaladze; Meri Pantsulaia; Nato Kotaria; Nino Berishvili; Paata Imnadze; Roena Sukhishvili; Salome Javashvili; Tamar Jashishvili; Tata Imnadze; Tea Teyvdoradze |

|                                                                                                                                                                                                                                                                                                                                                                                                                                                                                                                                                                                                                                                                                                                                                                                                                                                                                                                                                                                                                                                                                                                                                                                                                                                                                                                                                                                                                                                                                                                                                                                                                                                                                                                                                                                                                                                                                                                                                                                                                                                                                                                                                                                                                                                                                                                                                                                                                                                                                                                                                                                                                                                                                                                                                                                                                                                                                                                                                                                                                                                                                                                                                                                                                                                                                                                                                                                                                                                                                                                                                                                                                                                                                                                                                                                                                                                                                                                                                                                                                                                                                                                                                                                                                                                                                                                                                                                                                                                                                                                                                                                                                                                                                                                                                                                                                                                                                                                                                                                                                                                                                                                                                                                                                                                                                                                                                                                                                                                                                                                                                                                                                                                                                                                                                                                                                                                                                                                                                                                                                                                                                                                                                                                                                                                                                                                                                                                                                                                                                                                                                                                                                                                                                                                                                                                                                                                                                                                                                                                                                                                                                                                                                                                                                                                                                                                                                                                                                                                                                                                                                                                                                                                                                                                                                                                                                                                                                                                                                                                                                                                                                                                                                                                                                                                                                                                                                                                                                                                                                                                                                                                                                                                                                                                                                                                                                                                                                                                                                                                                                               |                                                                                                           |                       |  |
|-------------------------------------------------------------------------------------------------------------------------------------------------------------------------------------------------------------------------------------------------------------------------------------------------------------------------------------------------------------------------------------------------------------------------------------------------------------------------------------------------------------------------------------------------------------------------------------------------------------------------------------------------------------------------------------------------------------------------------------------------------------------------------------------------------------------------------------------------------------------------------------------------------------------------------------------------------------------------------------------------------------------------------------------------------------------------------------------------------------------------------------------------------------------------------------------------------------------------------------------------------------------------------------------------------------------------------------------------------------------------------------------------------------------------------------------------------------------------------------------------------------------------------------------------------------------------------------------------------------------------------------------------------------------------------------------------------------------------------------------------------------------------------------------------------------------------------------------------------------------------------------------------------------------------------------------------------------------------------------------------------------------------------------------------------------------------------------------------------------------------------------------------------------------------------------------------------------------------------------------------------------------------------------------------------------------------------------------------------------------------------------------------------------------------------------------------------------------------------------------------------------------------------------------------------------------------------------------------------------------------------------------------------------------------------------------------------------------------------------------------------------------------------------------------------------------------------------------------------------------------------------------------------------------------------------------------------------------------------------------------------------------------------------------------------------------------------------------------------------------------------------------------------------------------------------------------------------------------------------------------------------------------------------------------------------------------------------------------------------------------------------------------------------------------------------------------------------------------------------------------------------------------------------------------------------------------------------------------------------------------------------------------------------------------------------------------------------------------------------------------------------------------------------------------------------------------------------------------------------------------------------------------------------------------------------------------------------------------------------------------------------------------------------------------------------------------------------------------------------------------------------------------------------------------------------------------------------------------------------------------------------------------------------------------------------------------------------------------------------------------------------------------------------------------------------------------------------------------------------------------------------------------------------------------------------------------------------------------------------------------------------------------------------------------------------------------------------------------------------------------------------------------------------------------------------------------------------------------------------------------------------------------------------------------------------------------------------------------------------------------------------------------------------------------------------------------------------------------------------------------------------------------------------------------------------------------------------------------------------------------------------------------------------------------------------------------------------------------------------------------------------------------------------------------------------------------------------------------------------------------------------------------------------------------------------------------------------------------------------------------------------------------------------------------------------------------------------------------------------------------------------------------------------------------------------------------------------------------------------------------------------------------------------------------------------------------------------------------------------------------------------------------------------------------------------------------------------------------------------------------------------------------------------------------------------------------------------------------------------------------------------------------------------------------------------------------------------------------------------------------------------------------------------------------------------------------------------------------------------------------------------------------------------------------------------------------------------------------------------------------------------------------------------------------------------------------------------------------------------------------------------------------------------------------------------------------------------------------------------------------------------------------------------------------------------------------------------------------------------------------------------------------------------------------------------------------------------------------------------------------------------------------------------------------------------------------------------------------------------------------------------------------------------------------------------------------------------------------------------------------------------------------------------------------------------------------------------------------------------------------------------------------------------------------------------------------------------------------------------------------------------------------------------------------------------------------------------------------------------------------------------------------------------------------------------------------------------------------------------------------------------------------------------------------------------------------------------------------------------------------------------------------------------------------------------------------------------------------------------------------------------------------------------------------------------------------------------------------------------------------------------------------------------------------------------------------------------------------------------------------------------------------------------------------------------------------------------------------------------------------------------------------------------------------------------------------------------------------------------------------------------------------------------------------------------------------------------------------------------------------------------------------------------------------------------------------------------------------------------------------------------------------------------------------------------------------------------------------------------------------------------------------------|-----------------------------------------------------------------------------------------------------------|-----------------------|--|
| EPI_ISL_9227774                                                                                                                                                                                                                                                                                                                                                                                                                                                                                                                                                                                                                                                                                                                                                                                                                                                                                                                                                                                                                                                                                                                                                                                                                                                                                                                                                                                                                                                                                                                                                                                                                                                                                                                                                                                                                                                                                                                                                                                                                                                                                                                                                                                                                                                                                                                                                                                                                                                                                                                                                                                                                                                                                                                                                                                                                                                                                                                                                                                                                                                                                                                                                                                                                                                                                                                                                                                                                                                                                                                                                                                                                                                                                                                                                                                                                                                                                                                                                                                                                                                                                                                                                                                                                                                                                                                                                                                                                                                                                                                                                                                                                                                                                                                                                                                                                                                                                                                                                                                                                                                                                                                                                                                                                                                                                                                                                                                                                                                                                                                                                                                                                                                                                                                                                                                                                                                                                                                                                                                                                                                                                                                                                                                                                                                                                                                                                                                                                                                                                                                                                                                                                                                                                                                                                                                                                                                                                                                                                                                                                                                                                                                                                                                                                                                                                                                                                                                                                                                                                                                                                                                                                                                                                                                                                                                                                                                                                                                                                                                                                                                                                                                                                                                                                                                                                                                                                                                                                                                                                                                                                                                                                                                                                                                                                                                                                                                                                                                                                                                                               | Department für Labormedizin Abteilung III Bereich Molekulare Diagnostik Universitätsklinikum Halle(Saale) | Robert Koch Institute |  |
| EPI_ISL_8465069, EPI_ISL_8465070, EPI_ISL_8465082, EPI_ISL_8465083, EPI_ISL_8465088, EPI_ISL_8465089, EPI_ISL_8465093, EPI_ISL_8465100, EPI_ISL_8465116, EPI_ISL_8465117, EPI_ISL_8465119, EPI_ISL_8465121, EPI_ISL_8465122, EPI_ISL_8465123, EPI_ISL_8465124, EPI_ISL_8465125, EPI_ISL_8465128, EPI_ISL_8465133, EPI_ISL_8465135, EPI_ISL_8465137, EPI_ISL_8465140, EPI_ISL_8465141, EPI_ISL_8465142, EPI_ISL_8465147, EPI_ISL_8465151, EPI_ISL_8465154, EPI_ISL_8465157, EPI_ISL_8465165, EPI_ISL_8465169, EPI_ISL_8465170, EPI_ISL_8465178, EPI_ISL_8465181, EPI_ISL_8465187, EPI_ISL_8465192, EPI_ISL_8465193, EPI_ISL_8465196, EPI_ISL_8465226, EPI_ISL_8465227, EPI_ISL_8465236, EPI_ISL_8465243, EPI_ISL_8465244, EPI_ISL_8465248, EPI_ISL_8465249, EPI_ISL_8465251, EPI_ISL_8465258, EPI_ISL_8465262, EPI_ISL_8465263, EPI_ISL_8465273, EPI_ISL_8465275, EPI_ISL_8465280, EPI_ISL_8465284, EPI_ISL_8465285, EPI_ISL_8465288, EPI_ISL_8465290, EPI_ISL_8465293, EPI_ISL_8465294, EPI_ISL_8465296, EPI_ISL_8465301, EPI_ISL_8465303, EPI_ISL_8465305, EPI_ISL_8465307, EPI_ISL_8465309, EPI_ISL_8465311, EPI_ISL_8465313, EPI_ISL_8465314, EPI_ISL_8465315, EPI_ISL_8465319, EPI_ISL_8465324, EPI_ISL_8465329, EPI_ISL_8465330, EPI_ISL_8465331, EPI_ISL_8465333, EPI_ISL_8465334, EPI_ISL_8465335, EPI_ISL_8465336, EPI_ISL_8465339, EPI_ISL_8465340, EPI_ISL_8465341, EPI_ISL_8465343, EPI_ISL_8465345, EPI_ISL_8465346, EPI_ISL_8465347, EPI_ISL_8465348, EPI_ISL_8465349, EPI_ISL_8465421, EPI_ISL_8465422, EPI_ISL_8465423, EPI_ISL_8465424, EPI_ISL_8465425, EPI_ISL_8465426, EPI_ISL_8465427, EPI_ISL_8465428, EPI_ISL_8465431, EPI_ISL_8465433, EPI_ISL_8465434, EPI_ISL_8465441, EPI_ISL_8465445, EPI_ISL_8465446, EPI_ISL_8465449, EPI_ISL_8465450, EPI_ISL_8465454, EPI_ISL_8465456, EPI_ISL_8465458, EPI_ISL_8465458, EPI_ISL_8465464, EPI_ISL_8465465, EPI_ISL_8465467, EPI_ISL_8465470, EPI_ISL_8465471, EPI_ISL_8465472, EPI_ISL_8465473, EPI_ISL_8465474, EPI_ISL_8465475, EPI_ISL_8465476, EPI_ISL_8465477, EPI_ISL_8465478, EPI_ISL_8465479, EPI_ISL_8465480, EPI_ISL_8465481, EPI_ISL_8465482, EPI_ISL_8465483, EPI_ISL_8465484, EPI_ISL_8465485, EPI_ISL_8465486, EPI_ISL_8465487, EPI_ISL_8465488, EPI_ISL_8465489, EPI_ISL_8465490, EPI_ISL_8465491, EPI_ISL_8465492, EPI_ISL_8465493, EPI_ISL_8465494, EPI_ISL_8465495, EPI_ISL_8465496, EPI_ISL_8465497, EPI_ISL_8465498, EPI_ISL_8465499, EPI_ISL_8465502, EPI_ISL_8465508, EPI_ISL_8465513, EPI_ISL_8465518, EPI_ISL_8465521, EPI_ISL_8465522, EPI_ISL_8465525, EPI_ISL_8465527, EPI_ISL_8465528, EPI_ISL_8465529, EPI_ISL_8465530, EPI_ISL_8465531, EPI_ISL_8465532, EPI_ISL_8465533, EPI_ISL_8465534, EPI_ISL_8465535, EPI_ISL_8465536, EPI_ISL_8465537, EPI_ISL_8465538, EPI_ISL_8465539, EPI_ISL_8465540, EPI_ISL_8465541, EPI_ISL_8465542, EPI_ISL_8465543, EPI_ISL_8465544, EPI_ISL_8465545, EPI_ISL_8465546, EPI_ISL_8465547, EPI_ISL_8465548, EPI_ISL_8465549, EPI_ISL_8465550, EPI_ISL_8465551, EPI_ISL_8465552, EPI_ISL_8465553, EPI_ISL_8465554, EPI_ISL_8465555, EPI_ISL_8465556, EPI_ISL_8465557, EPI_ISL_8465558, EPI_ISL_8465559, EPI_ISL_8465560, EPI_ISL_8465561, EPI_ISL_8465562, EPI_ISL_8465563, EPI_ISL_8465564, EPI_ISL_8465565, EPI_ISL_8465566, EPI_ISL_8465567, EPI_ISL_8465568, EPI_ISL_8465569, EPI_ISL_8465570, EPI_ISL_8465571, EPI_ISL_8465572, EPI_ISL_8465573, EPI_ISL_8465574, EPI_ISL_8465575, EPI_ISL_8465576, EPI_ISL_8465577, EPI_ISL_8465578, EPI_ISL_8465579, EPI_ISL_8465580, EPI_ISL_8465581, EPI_ISL_8465582, EPI_ISL_8465583, EPI_ISL_8465584, EPI_ISL_8465585, EPI_ISL_8465586, EPI_ISL_8465587, EPI_ISL_8465588, EPI_ISL_8465589, EPI_ISL_8465590, EPI_ISL_8465591, EPI_ISL_8465592, EPI_ISL_8465593, EPI_ISL_8465594, EPI_ISL_8465595, EPI_ISL_8465596, EPI_ISL_8465597, EPI_ISL_8465598, EPI_ISL_8465599, EPI_ISL_8466000, EPI_ISL_8466001, EPI_ISL_8466002, EPI_ISL_8466003, EPI_ISL_8466004, EPI_ISL_8466005, EPI_ISL_8466006, EPI_ISL_8466007, EPI_ISL_8466008, EPI_ISL_8466009, EPI_ISL_8466010, EPI_ISL_8466011, EPI_ISL_8466012, EPI_ISL_8466013, EPI_ISL_8466014, EPI_ISL_8466015, EPI_ISL_8466016, EPI_ISL_8466017, EPI_ISL_8466018, EPI_ISL_8466019, EPI_ISL_8466020, EPI_ISL_8466021, EPI_ISL_8466022, EPI_ISL_8466023, EPI_ISL_8466024, EPI_ISL_8466025, EPI_ISL_8466026, EPI_ISL_8466027, EPI_ISL_8466028, EPI_ISL_8466029, EPI_ISL_8466030, EPI_ISL_8466031, EPI_ISL_8466032, EPI_ISL_8466033, EPI_ISL_8466034, EPI_ISL_8466035, EPI_ISL_8466036, EPI_ISL_8466037, EPI_ISL_8466038, EPI_ISL_8466039, EPI_ISL_8466040, EPI_ISL_8466041, EPI_ISL_8466042, EPI_ISL_8466043, EPI_ISL_8466044, EPI_ISL_8466045, EPI_ISL_8466046, EPI_ISL_8466047, EPI_ISL_8466048, EPI_ISL_8466049, EPI_ISL_8466050, EPI_ISL_8466051, EPI_ISL_8466052, EPI_ISL_8466053, EPI_ISL_8466054, EPI_ISL_8466055, EPI_ISL_8466056, EPI_ISL_8466057, EPI_ISL_8466058, EPI_ISL_8466059, EPI_ISL_8466060, EPI_ISL_8466061, EPI_ISL_8466062, EPI_ISL_8466063, EPI_ISL_8466064, EPI_ISL_8466065, EPI_ISL_8466066, EPI_ISL_8466067, EPI_ISL_8466068, EPI_ISL_8466069, EPI_ISL_8466070, EPI_ISL_8466071, EPI_ISL_8466072, EPI_ISL_8466073, EPI_ISL_8466074, EPI_ISL_8466075, EPI_ISL_8466076, EPI_ISL_8466077, EPI_ISL_8466078, EPI_ISL_8466079, EPI_ISL_8466080, EPI_ISL_8466081, EPI_ISL_8466082, EPI_ISL_8466083, EPI_ISL_8466084, EPI_ISL_8466085, EPI_ISL_8466086, EPI_ISL_8466087, EPI_ISL_8466088, EPI_ISL_8466089, EPI_ISL_8466090, EPI_ISL_8466091, EPI_ISL_8466092, EPI_ISL_8466093, EPI_ISL_8466094, EPI_ISL_8466095, EPI_ISL_8466096, EPI_ISL_8466097, EPI_ISL_8466098, EPI_ISL_8466099, EPI_ISL_8466100, EPI_ISL_8466101, EPI_ISL_8466102, EPI_ISL_8466103, EPI_ISL_8466104, EPI_ISL_8466105, EPI_ISL_8466106, EPI_ISL_8466107, EPI_ISL_8466108, EPI_ISL_8466109, EPI_ISL_8466110, EPI_ISL_8466111, EPI_ISL_8466112, EPI_ISL_8466113, EPI_ISL_8466114, EPI_ISL_8466115, EPI_ISL_8466116, EPI_ISL_8466117, EPI_ISL_8466118, EPI_ISL_8466119, EPI_ISL_8466120, EPI_ISL_8466121, EPI_ISL_8466122, EPI_ISL_8466123, EPI_ISL_8466124, EPI_ISL_8466125, EPI_ISL_8466126, EPI_ISL_8466127, EPI_ISL_8466128, EPI_ISL_8466129, EPI_ISL_8466130, EPI_ISL_8466131, EPI_ISL_8466132, EPI_ISL_8466133, EPI_ISL_8466134, EPI_ISL_8466135, EPI_ISL_8466136, EPI_ISL_8466137, EPI_ISL_8466138, EPI_ISL_8466139, EPI_ISL_8466140, EPI_ISL_8466141, EPI_ISL_8466142, EPI_ISL_8466143, EPI_ISL_8466144, EPI_ISL_8466145, EPI_ISL_8466146, EPI_ISL_8466147, EPI_ISL_8466148, EPI_ISL_8466149, EPI_ISL_8466150, EPI_ISL_8466151, EPI_ISL_8466152, EPI_ISL_8466153, EPI_ISL_8466154, EPI_ISL_8466155, EPI_ISL_8466156, EPI_ISL_8466157, EPI_ISL_8466158, EPI_ISL_8466159, EPI_ISL_8466160, EPI_ISL_8466161, EPI_ISL_8466162, EPI_ISL_8466163, EPI_ISL_8466164, EPI_ISL_8466165, EPI_ISL_8466166, EPI_ISL_8466167, EPI_ISL_8466168, EPI_ISL_8466169, EPI_ISL_8466170, EPI_ISL_8466171, EPI_ISL_8466172, EPI_ISL_8466173, EPI_ISL_8466174, EPI_ISL_8466175, EPI_ISL_8466176, EPI_ISL_8466177, EPI_ISL_8466178, EPI_ISL_8466179, EPI_ISL_8466180, EPI_ISL_8466181, EPI_ISL_8466182, EPI_ISL_8466183, EPI_ISL_8466184, EPI_ISL_8466185, EPI_ISL_8466186, EPI_ISL_8466187, EPI_ISL_8466188, EPI_ISL_8466189, EPI_ISL_8466190, EPI_ISL_8466191, EPI_ISL_8466192, EPI_ISL_8466193, EPI_ISL_8466194, EPI_ISL_8466195, EPI_ISL_8466196, EPI_ISL_8466197, EPI_ISL_8466198, EPI_ISL_8466199, EPI_ISL_8466200, EPI_ISL_8466201, EPI_ISL_8466202, EPI_ISL_8466203, EPI_ISL_8466204, EPI_ISL_8466205, EPI_ISL_8466206, EPI_ISL_8466207, EPI_ISL_8466208, EPI_ISL_8466209, EPI_ISL_8466210, EPI_ISL_8466211, EPI_ISL_8466212, EPI_ISL_8466213, EPI_ISL_8466214, EPI_ISL_8466215, EPI_ISL_8466216, EPI_ISL_8466217, EPI_ISL_8466218, EPI_ISL_8466219, EPI_ISL_8466220, EPI_ISL_8466221, EPI_ISL_8466222, EPI_ISL_8466223, EPI_ISL_8466224, EPI_ISL_8466225, EPI_ISL_8466226, EPI_ISL_8466227, EPI_ISL_8466228, EPI_ISL_8466229, EPI_ISL_8466230, EPI_ISL_8466231, EPI_ISL_8466232, EPI_ISL_8466233, EPI_ISL_8466234, EPI_ISL_8466235, EPI_ISL_8466236, EPI_ISL_8466237, EPI_ISL_8466238, EPI_ISL_8466239, EPI_ISL_8466240, EPI_ISL_8466241, EPI_ISL_8466242, EPI_ISL_8466243, EPI_ISL_8466244, EPI_ISL_8466245, EPI_ISL_8466246, EPI_ISL_8466247, EPI_ISL_8466248, EPI_ISL_8466249, EPI_ISL_8466250, EPI_ISL_8466251, EPI_ISL_8466252, EPI_ISL_8466253, EPI_ISL_8466254, EPI_ISL_8466255, EPI_ISL_8466256, EPI_ISL_8466257, EPI_ISL_8466258, EPI_ISL_8466259, EPI_ISL_8466260, EPI_ISL_8466261, EPI_ISL_8466262, EPI_ISL_8466263, EPI_ISL_8466264, EPI_ISL_8466265, EPI_ISL_8466266, EPI_ISL_8466267, EPI_ISL_8466268, EPI_ISL_8466269, EPI_ISL_8466270, EPI_ISL_8466271, EPI_ISL_8466272, EPI_ISL_8466273, EPI_ISL_8466274, EPI_ISL_8466275, EPI_ISL_8466276, EPI_ISL_8466277, EPI_ISL_8466278, EPI_ISL_8466279, EPI_ISL_8466280, EPI_ISL_8466281, EPI_ISL_8466282, EPI_ISL_8466283, EPI_ISL_8466284, EPI_ISL_8466285, EPI_ISL_8466286, EPI_ISL_8466287, EPI_ISL_8466288, EPI_ISL_8466289, EPI_ISL_8466290, EPI_ISL_8466291, EPI_ISL_8466292, |                                                                                                           |                       |  |







|                                                                                                                                                                                                                                                                                                                                                                                                                                                                                                                                                                                                                                                                                                                                                                                                                                                                                                                                                                                                                                                                                                                                                                                                                                                                                                                                                                                                                                                                                                                                                                                                                                                                                                                                                                                                                                                                                                                                                                                                                                                                                                                                                                                                                                                                                                                                                                                                                                                                                                                                                                                                                                                                                                                                                                                                                                                                                                                                                                                                                                                                                                                                                                                                                                                                                                                                                                                                                                                                                                                                                                                                                                                                                                                                                                                                                                                                                                                                                                                                                                                                                                                                                                                                                                                                                                                                                                                                                                                                                                                                                                                                                                                                                                                                                                                                                                                                                                                                                                                                                                                                                                                                                                                                                                                                                                                                                                                                                                                                                                                                                                                                                                                                                                                                                                                                                                                                                                                                                                                                                                                                                                                                                                                                                                                                                                                                                                                                                                                                                                                                                                                                                                                                                                                                                                                                                                                                                                                                                                                                                                                                                                                                                                                                                                                                                                                                                                                                                                                                                                                                                                                                                                                                                                                                                                                                                                                                                                                                                                                                                                                                                                                                                                                                                                                                                                                                                                                                                                                                                                                                                                                                                                                                                                                                                                                                                                                                                                                                                                                                                                                                                                                                                                                                                                                                                                                                                                                                                                                                                                                                                                                                                                                                                                                                                                                                                                                                                                                                                                                                                                                                                       |                                                                                                                      |                                                                                                                                                                                                                    |                                                                                                                                                                                                                                                                                                                                                                                                                                                                                                                                                                                                                                                                                                                                                                                                                                                                                                                                                                                                |
|---------------------------------------------------------------------------------------------------------------------------------------------------------------------------------------------------------------------------------------------------------------------------------------------------------------------------------------------------------------------------------------------------------------------------------------------------------------------------------------------------------------------------------------------------------------------------------------------------------------------------------------------------------------------------------------------------------------------------------------------------------------------------------------------------------------------------------------------------------------------------------------------------------------------------------------------------------------------------------------------------------------------------------------------------------------------------------------------------------------------------------------------------------------------------------------------------------------------------------------------------------------------------------------------------------------------------------------------------------------------------------------------------------------------------------------------------------------------------------------------------------------------------------------------------------------------------------------------------------------------------------------------------------------------------------------------------------------------------------------------------------------------------------------------------------------------------------------------------------------------------------------------------------------------------------------------------------------------------------------------------------------------------------------------------------------------------------------------------------------------------------------------------------------------------------------------------------------------------------------------------------------------------------------------------------------------------------------------------------------------------------------------------------------------------------------------------------------------------------------------------------------------------------------------------------------------------------------------------------------------------------------------------------------------------------------------------------------------------------------------------------------------------------------------------------------------------------------------------------------------------------------------------------------------------------------------------------------------------------------------------------------------------------------------------------------------------------------------------------------------------------------------------------------------------------------------------------------------------------------------------------------------------------------------------------------------------------------------------------------------------------------------------------------------------------------------------------------------------------------------------------------------------------------------------------------------------------------------------------------------------------------------------------------------------------------------------------------------------------------------------------------------------------------------------------------------------------------------------------------------------------------------------------------------------------------------------------------------------------------------------------------------------------------------------------------------------------------------------------------------------------------------------------------------------------------------------------------------------------------------------------------------------------------------------------------------------------------------------------------------------------------------------------------------------------------------------------------------------------------------------------------------------------------------------------------------------------------------------------------------------------------------------------------------------------------------------------------------------------------------------------------------------------------------------------------------------------------------------------------------------------------------------------------------------------------------------------------------------------------------------------------------------------------------------------------------------------------------------------------------------------------------------------------------------------------------------------------------------------------------------------------------------------------------------------------------------------------------------------------------------------------------------------------------------------------------------------------------------------------------------------------------------------------------------------------------------------------------------------------------------------------------------------------------------------------------------------------------------------------------------------------------------------------------------------------------------------------------------------------------------------------------------------------------------------------------------------------------------------------------------------------------------------------------------------------------------------------------------------------------------------------------------------------------------------------------------------------------------------------------------------------------------------------------------------------------------------------------------------------------------------------------------------------------------------------------------------------------------------------------------------------------------------------------------------------------------------------------------------------------------------------------------------------------------------------------------------------------------------------------------------------------------------------------------------------------------------------------------------------------------------------------------------------------------------------------------------------------------------------------------------------------------------------------------------------------------------------------------------------------------------------------------------------------------------------------------------------------------------------------------------------------------------------------------------------------------------------------------------------------------------------------------------------------------------------------------------------------------------------------------------------------------------------------------------------------------------------------------------------------------------------------------------------------------------------------------------------------------------------------------------------------------------------------------------------------------------------------------------------------------------------------------------------------------------------------------------------------------------------------------------------------------------------------------------------------------------------------------------------------------------------------------------------------------------------------------------------------------------------------------------------------------------------------------------------------------------------------------------------------------------------------------------------------------------------------------------------------------------------------------------------------------------------------------------------------------------------------------------------------------------------------------------------------------------------------------------------------------------------------------------------------------------------------------------------------------------------------------------------------------------------------------------------------------------------------------------------------------------------------------------------------------------------------------------------------------------------------------------------------------------------------------------------------------------------------------------------------------------------------------------------------------------------------------------------------------------------------------------------------------------------------------------------------------------------------------------------------------------------------------------------------------------------------------------------------------------------------------------------------------------------------------------------------------------------------------------------------------------------------------------------------------------------------------------------------------------------------------------------------------------------------------------------------------------------------------------------------------------------------------------------------------------------------------------------------------------------|----------------------------------------------------------------------------------------------------------------------|--------------------------------------------------------------------------------------------------------------------------------------------------------------------------------------------------------------------|------------------------------------------------------------------------------------------------------------------------------------------------------------------------------------------------------------------------------------------------------------------------------------------------------------------------------------------------------------------------------------------------------------------------------------------------------------------------------------------------------------------------------------------------------------------------------------------------------------------------------------------------------------------------------------------------------------------------------------------------------------------------------------------------------------------------------------------------------------------------------------------------------------------------------------------------------------------------------------------------|
| EPI_ISL_8753966                                                                                                                                                                                                                                                                                                                                                                                                                                                                                                                                                                                                                                                                                                                                                                                                                                                                                                                                                                                                                                                                                                                                                                                                                                                                                                                                                                                                                                                                                                                                                                                                                                                                                                                                                                                                                                                                                                                                                                                                                                                                                                                                                                                                                                                                                                                                                                                                                                                                                                                                                                                                                                                                                                                                                                                                                                                                                                                                                                                                                                                                                                                                                                                                                                                                                                                                                                                                                                                                                                                                                                                                                                                                                                                                                                                                                                                                                                                                                                                                                                                                                                                                                                                                                                                                                                                                                                                                                                                                                                                                                                                                                                                                                                                                                                                                                                                                                                                                                                                                                                                                                                                                                                                                                                                                                                                                                                                                                                                                                                                                                                                                                                                                                                                                                                                                                                                                                                                                                                                                                                                                                                                                                                                                                                                                                                                                                                                                                                                                                                                                                                                                                                                                                                                                                                                                                                                                                                                                                                                                                                                                                                                                                                                                                                                                                                                                                                                                                                                                                                                                                                                                                                                                                                                                                                                                                                                                                                                                                                                                                                                                                                                                                                                                                                                                                                                                                                                                                                                                                                                                                                                                                                                                                                                                                                                                                                                                                                                                                                                                                                                                                                                                                                                                                                                                                                                                                                                                                                                                                                                                                                                                                                                                                                                                                                                                                                                                                                                                                                                                                                                                       | University Hospital                                                                                                  | Dhulikhel Hospital, Kathmandu University Hospital                                                                                                                                                                  |                                                                                                                                                                                                                                                                                                                                                                                                                                                                                                                                                                                                                                                                                                                                                                                                                                                                                                                                                                                                |
| EPI_ISL_8637916, EPI_ISL_8637923, EPI_ISL_8637925, EPI_ISL_8637935, EPI_ISL_8637936                                                                                                                                                                                                                                                                                                                                                                                                                                                                                                                                                                                                                                                                                                                                                                                                                                                                                                                                                                                                                                                                                                                                                                                                                                                                                                                                                                                                                                                                                                                                                                                                                                                                                                                                                                                                                                                                                                                                                                                                                                                                                                                                                                                                                                                                                                                                                                                                                                                                                                                                                                                                                                                                                                                                                                                                                                                                                                                                                                                                                                                                                                                                                                                                                                                                                                                                                                                                                                                                                                                                                                                                                                                                                                                                                                                                                                                                                                                                                                                                                                                                                                                                                                                                                                                                                                                                                                                                                                                                                                                                                                                                                                                                                                                                                                                                                                                                                                                                                                                                                                                                                                                                                                                                                                                                                                                                                                                                                                                                                                                                                                                                                                                                                                                                                                                                                                                                                                                                                                                                                                                                                                                                                                                                                                                                                                                                                                                                                                                                                                                                                                                                                                                                                                                                                                                                                                                                                                                                                                                                                                                                                                                                                                                                                                                                                                                                                                                                                                                                                                                                                                                                                                                                                                                                                                                                                                                                                                                                                                                                                                                                                                                                                                                                                                                                                                                                                                                                                                                                                                                                                                                                                                                                                                                                                                                                                                                                                                                                                                                                                                                                                                                                                                                                                                                                                                                                                                                                                                                                                                                                                                                                                                                                                                                                                                                                                                                                                                                                                                                                   | Diagnofirm Medical Laboratories                                                                                      | Botswana Harvard HIV Reference Laboratory                                                                                                                                                                          | Boitumelo Zuze; Botshelo Radibe; Dorcas Maruapula; Joseph Makhema; Keoratie Ntshambiwa; Kgomotso Moruisi; Legodile Koepile; Mosepele Mosepele; Mphaphi B. Mbulawa; Ontlametse T. Bareng; Pamela Smith-Lawrence; Roger Shapiro; Sefetogi Ramaologa; Shahin Lockman; Sikhulle Moyo; Simani Gaseitsiwe; Thongboho Mphoyakgosi; Wonderful T. Choga                                                                                                                                                                                                                                                                                                                                                                                                                                                                                                                                                                                                                                                 |
| EPI_ISL_9301289                                                                                                                                                                                                                                                                                                                                                                                                                                                                                                                                                                                                                                                                                                                                                                                                                                                                                                                                                                                                                                                                                                                                                                                                                                                                                                                                                                                                                                                                                                                                                                                                                                                                                                                                                                                                                                                                                                                                                                                                                                                                                                                                                                                                                                                                                                                                                                                                                                                                                                                                                                                                                                                                                                                                                                                                                                                                                                                                                                                                                                                                                                                                                                                                                                                                                                                                                                                                                                                                                                                                                                                                                                                                                                                                                                                                                                                                                                                                                                                                                                                                                                                                                                                                                                                                                                                                                                                                                                                                                                                                                                                                                                                                                                                                                                                                                                                                                                                                                                                                                                                                                                                                                                                                                                                                                                                                                                                                                                                                                                                                                                                                                                                                                                                                                                                                                                                                                                                                                                                                                                                                                                                                                                                                                                                                                                                                                                                                                                                                                                                                                                                                                                                                                                                                                                                                                                                                                                                                                                                                                                                                                                                                                                                                                                                                                                                                                                                                                                                                                                                                                                                                                                                                                                                                                                                                                                                                                                                                                                                                                                                                                                                                                                                                                                                                                                                                                                                                                                                                                                                                                                                                                                                                                                                                                                                                                                                                                                                                                                                                                                                                                                                                                                                                                                                                                                                                                                                                                                                                                                                                                                                                                                                                                                                                                                                                                                                                                                                                                                                                                                                                       | Diagnostyka Sp. z o. o. Szczecin                                                                                     | Wojewodzka Stacja Sanitarno-Epidemiologiczna w Gorzowie Wielkopolskim                                                                                                                                              | Elzbieta Justynska; Klaudia Kobendza-Wlodarczak; Patrycja Faberska; Patrycja Rakowska and Marek Margol; Renata Siegel                                                                                                                                                                                                                                                                                                                                                                                                                                                                                                                                                                                                                                                                                                                                                                                                                                                                          |
| EPI_ISL_8799883                                                                                                                                                                                                                                                                                                                                                                                                                                                                                                                                                                                                                                                                                                                                                                                                                                                                                                                                                                                                                                                                                                                                                                                                                                                                                                                                                                                                                                                                                                                                                                                                                                                                                                                                                                                                                                                                                                                                                                                                                                                                                                                                                                                                                                                                                                                                                                                                                                                                                                                                                                                                                                                                                                                                                                                                                                                                                                                                                                                                                                                                                                                                                                                                                                                                                                                                                                                                                                                                                                                                                                                                                                                                                                                                                                                                                                                                                                                                                                                                                                                                                                                                                                                                                                                                                                                                                                                                                                                                                                                                                                                                                                                                                                                                                                                                                                                                                                                                                                                                                                                                                                                                                                                                                                                                                                                                                                                                                                                                                                                                                                                                                                                                                                                                                                                                                                                                                                                                                                                                                                                                                                                                                                                                                                                                                                                                                                                                                                                                                                                                                                                                                                                                                                                                                                                                                                                                                                                                                                                                                                                                                                                                                                                                                                                                                                                                                                                                                                                                                                                                                                                                                                                                                                                                                                                                                                                                                                                                                                                                                                                                                                                                                                                                                                                                                                                                                                                                                                                                                                                                                                                                                                                                                                                                                                                                                                                                                                                                                                                                                                                                                                                                                                                                                                                                                                                                                                                                                                                                                                                                                                                                                                                                                                                                                                                                                                                                                                                                                                                                                                                                       | Diagnostyka Sp. z o.o. Gdańsk                                                                                        | 1. Trinity SARS-CoV-2 sequencing consortium; University of Gdansk, Medical University of Gdansk, Vaxican Ltd., Invicta Ltd. 2. National Institute of Public Health - National Institute of Hygiene, Warsaw, Poland | Celina Cybulska; Karolina Gackowska; Katarzyna Groth; Katarzyna Zacharczuk; Krystyna Bienkowska Szewczyk; Lukasz Rabalski; Maciej Grzybek; Maciej Kosinski; Magdalena Nowakowska; Marcin Lubocki; Malgorzata Sadkowska-Tody; Tomasz Wolkowicz                                                                                                                                                                                                                                                                                                                                                                                                                                                                                                                                                                                                                                                                                                                                                  |
| EPI_ISL_8790064, EPI_ISL_8790091                                                                                                                                                                                                                                                                                                                                                                                                                                                                                                                                                                                                                                                                                                                                                                                                                                                                                                                                                                                                                                                                                                                                                                                                                                                                                                                                                                                                                                                                                                                                                                                                                                                                                                                                                                                                                                                                                                                                                                                                                                                                                                                                                                                                                                                                                                                                                                                                                                                                                                                                                                                                                                                                                                                                                                                                                                                                                                                                                                                                                                                                                                                                                                                                                                                                                                                                                                                                                                                                                                                                                                                                                                                                                                                                                                                                                                                                                                                                                                                                                                                                                                                                                                                                                                                                                                                                                                                                                                                                                                                                                                                                                                                                                                                                                                                                                                                                                                                                                                                                                                                                                                                                                                                                                                                                                                                                                                                                                                                                                                                                                                                                                                                                                                                                                                                                                                                                                                                                                                                                                                                                                                                                                                                                                                                                                                                                                                                                                                                                                                                                                                                                                                                                                                                                                                                                                                                                                                                                                                                                                                                                                                                                                                                                                                                                                                                                                                                                                                                                                                                                                                                                                                                                                                                                                                                                                                                                                                                                                                                                                                                                                                                                                                                                                                                                                                                                                                                                                                                                                                                                                                                                                                                                                                                                                                                                                                                                                                                                                                                                                                                                                                                                                                                                                                                                                                                                                                                                                                                                                                                                                                                                                                                                                                                                                                                                                                                                                                                                                                                                                                                      | Dipartimento di Medicina di Laboratorio, Azienda sanitaria universitaria Friuli Centrale (ASU FC)                    | Dipartimento di Medicina di Laboratorio, Azienda sanitaria universitaria Friuli Centrale (ASU FC)                                                                                                                  | Catia Mio; Chiara Dal Secco; Corrado Pipan; Federica Baldan; Francesco Curcio; Stefania Marzinotto                                                                                                                                                                                                                                                                                                                                                                                                                                                                                                                                                                                                                                                                                                                                                                                                                                                                                             |
| EPI_ISL_9779432, EPI_ISL_9779433, EPI_ISL_9779468, EPI_ISL_9779469, EPI_ISL_9779470, EPI_ISL_9779472, EPI_ISL_9779473, EPI_ISL_9779474, EPI_ISL_9779475, EPI_ISL_9779485, EPI_ISL_9779486                                                                                                                                                                                                                                                                                                                                                                                                                                                                                                                                                                                                                                                                                                                                                                                                                                                                                                                                                                                                                                                                                                                                                                                                                                                                                                                                                                                                                                                                                                                                                                                                                                                                                                                                                                                                                                                                                                                                                                                                                                                                                                                                                                                                                                                                                                                                                                                                                                                                                                                                                                                                                                                                                                                                                                                                                                                                                                                                                                                                                                                                                                                                                                                                                                                                                                                                                                                                                                                                                                                                                                                                                                                                                                                                                                                                                                                                                                                                                                                                                                                                                                                                                                                                                                                                                                                                                                                                                                                                                                                                                                                                                                                                                                                                                                                                                                                                                                                                                                                                                                                                                                                                                                                                                                                                                                                                                                                                                                                                                                                                                                                                                                                                                                                                                                                                                                                                                                                                                                                                                                                                                                                                                                                                                                                                                                                                                                                                                                                                                                                                                                                                                                                                                                                                                                                                                                                                                                                                                                                                                                                                                                                                                                                                                                                                                                                                                                                                                                                                                                                                                                                                                                                                                                                                                                                                                                                                                                                                                                                                                                                                                                                                                                                                                                                                                                                                                                                                                                                                                                                                                                                                                                                                                                                                                                                                                                                                                                                                                                                                                                                                                                                                                                                                                                                                                                                                                                                                                                                                                                                                                                                                                                                                                                                                                                                                                                                                                             | see above                                                                                                            | District Hospital                                                                                                                                                                                                  | Centre for DNA Fingerprinting and Diagnostics                                                                                                                                                                                                                                                                                                                                                                                                                                                                                                                                                                                                                                                                                                                                                                                                                                                                                                                                                  |
| EPI_ISL_9023156, EPI_ISL_9234050                                                                                                                                                                                                                                                                                                                                                                                                                                                                                                                                                                                                                                                                                                                                                                                                                                                                                                                                                                                                                                                                                                                                                                                                                                                                                                                                                                                                                                                                                                                                                                                                                                                                                                                                                                                                                                                                                                                                                                                                                                                                                                                                                                                                                                                                                                                                                                                                                                                                                                                                                                                                                                                                                                                                                                                                                                                                                                                                                                                                                                                                                                                                                                                                                                                                                                                                                                                                                                                                                                                                                                                                                                                                                                                                                                                                                                                                                                                                                                                                                                                                                                                                                                                                                                                                                                                                                                                                                                                                                                                                                                                                                                                                                                                                                                                                                                                                                                                                                                                                                                                                                                                                                                                                                                                                                                                                                                                                                                                                                                                                                                                                                                                                                                                                                                                                                                                                                                                                                                                                                                                                                                                                                                                                                                                                                                                                                                                                                                                                                                                                                                                                                                                                                                                                                                                                                                                                                                                                                                                                                                                                                                                                                                                                                                                                                                                                                                                                                                                                                                                                                                                                                                                                                                                                                                                                                                                                                                                                                                                                                                                                                                                                                                                                                                                                                                                                                                                                                                                                                                                                                                                                                                                                                                                                                                                                                                                                                                                                                                                                                                                                                                                                                                                                                                                                                                                                                                                                                                                                                                                                                                                                                                                                                                                                                                                                                                                                                                                                                                                                                                                      | Divine Lab, Fategunj, Vadodara                                                                                       | Gujarat Biotechnology Research Centre                                                                                                                                                                              | Akhilesh Modi; Apurvashin Puvar; Bhadrashinh Gohil; Chaitanya Joshi; Disha Vora; Janvi Raval; Jaykumar Rangani; Kaushikbhai; Madhvi Joshi; Nimesh Patel; Nitin Savaliya; NitinShukla; Priyank Chavda; Ramesh Pandit; Roshani Mishra; Sonal Sharma; Tasnim Trivedi; Zarna Patel                                                                                                                                                                                                                                                                                                                                                                                                                                                                                                                                                                                                                                                                                                                 |
| EPI_ISL_8998405, EPI_ISL_9511358, EPI_ISL_9511512, EPI_ISL_9511520, EPI_ISL_9511522, EPI_ISL_9511531, EPI_ISL_9792447, EPI_ISL_9792960, EPI_ISL_9792962, EPI_ISL_9792977, EPI_ISL_9792978, EPI_ISL_9792979, EPI_ISL_9792982, EPI_ISL_9792990, EPI_ISL_9792992                                                                                                                                                                                                                                                                                                                                                                                                                                                                                                                                                                                                                                                                                                                                                                                                                                                                                                                                                                                                                                                                                                                                                                                                                                                                                                                                                                                                                                                                                                                                                                                                                                                                                                                                                                                                                                                                                                                                                                                                                                                                                                                                                                                                                                                                                                                                                                                                                                                                                                                                                                                                                                                                                                                                                                                                                                                                                                                                                                                                                                                                                                                                                                                                                                                                                                                                                                                                                                                                                                                                                                                                                                                                                                                                                                                                                                                                                                                                                                                                                                                                                                                                                                                                                                                                                                                                                                                                                                                                                                                                                                                                                                                                                                                                                                                                                                                                                                                                                                                                                                                                                                                                                                                                                                                                                                                                                                                                                                                                                                                                                                                                                                                                                                                                                                                                                                                                                                                                                                                                                                                                                                                                                                                                                                                                                                                                                                                                                                                                                                                                                                                                                                                                                                                                                                                                                                                                                                                                                                                                                                                                                                                                                                                                                                                                                                                                                                                                                                                                                                                                                                                                                                                                                                                                                                                                                                                                                                                                                                                                                                                                                                                                                                                                                                                                                                                                                                                                                                                                                                                                                                                                                                                                                                                                                                                                                                                                                                                                                                                                                                                                                                                                                                                                                                                                                                                                                                                                                                                                                                                                                                                                                                                                                                                                                                                                                         | see above                                                                                                            | Division of Emerging Infectious Diseases, Bureau of Infectious Diseases Diagnosis Control, Korea Disease Control and Prevention Agency                                                                             | Bureau of Infectious Diseases Diagnosis Control, Korea Disease Control and Prevention Agency                                                                                                                                                                                                                                                                                                                                                                                                                                                                                                                                                                                                                                                                                                                                                                                                                                                                                                   |
| EPI_ISL_8649313, EPI_ISL_8649338, EPI_ISL_8890453, EPI_ISL_8890455, EPI_ISL_8890458, EPI_ISL_8890461                                                                                                                                                                                                                                                                                                                                                                                                                                                                                                                                                                                                                                                                                                                                                                                                                                                                                                                                                                                                                                                                                                                                                                                                                                                                                                                                                                                                                                                                                                                                                                                                                                                                                                                                                                                                                                                                                                                                                                                                                                                                                                                                                                                                                                                                                                                                                                                                                                                                                                                                                                                                                                                                                                                                                                                                                                                                                                                                                                                                                                                                                                                                                                                                                                                                                                                                                                                                                                                                                                                                                                                                                                                                                                                                                                                                                                                                                                                                                                                                                                                                                                                                                                                                                                                                                                                                                                                                                                                                                                                                                                                                                                                                                                                                                                                                                                                                                                                                                                                                                                                                                                                                                                                                                                                                                                                                                                                                                                                                                                                                                                                                                                                                                                                                                                                                                                                                                                                                                                                                                                                                                                                                                                                                                                                                                                                                                                                                                                                                                                                                                                                                                                                                                                                                                                                                                                                                                                                                                                                                                                                                                                                                                                                                                                                                                                                                                                                                                                                                                                                                                                                                                                                                                                                                                                                                                                                                                                                                                                                                                                                                                                                                                                                                                                                                                                                                                                                                                                                                                                                                                                                                                                                                                                                                                                                                                                                                                                                                                                                                                                                                                                                                                                                                                                                                                                                                                                                                                                                                                                                                                                                                                                                                                                                                                                                                                                                                                                                                                                                  | Division of Medical Virology, National Health Laboratory Service (NHL), Tygerberg Hospital / Stellenbosch University | Division of Medical Virology, National Health Laboratory Service (NHL), Tygerberg Hospital / Stellenbosch University                                                                                               | Gert van Zyl; Mathilda Claassen; Shannon Wilson; Susan Engelbrecht; Tania Stander; Tongai Maponga; Wolfgang Preiser                                                                                                                                                                                                                                                                                                                                                                                                                                                                                                                                                                                                                                                                                                                                                                                                                                                                            |
| EPI_ISL_9234038                                                                                                                                                                                                                                                                                                                                                                                                                                                                                                                                                                                                                                                                                                                                                                                                                                                                                                                                                                                                                                                                                                                                                                                                                                                                                                                                                                                                                                                                                                                                                                                                                                                                                                                                                                                                                                                                                                                                                                                                                                                                                                                                                                                                                                                                                                                                                                                                                                                                                                                                                                                                                                                                                                                                                                                                                                                                                                                                                                                                                                                                                                                                                                                                                                                                                                                                                                                                                                                                                                                                                                                                                                                                                                                                                                                                                                                                                                                                                                                                                                                                                                                                                                                                                                                                                                                                                                                                                                                                                                                                                                                                                                                                                                                                                                                                                                                                                                                                                                                                                                                                                                                                                                                                                                                                                                                                                                                                                                                                                                                                                                                                                                                                                                                                                                                                                                                                                                                                                                                                                                                                                                                                                                                                                                                                                                                                                                                                                                                                                                                                                                                                                                                                                                                                                                                                                                                                                                                                                                                                                                                                                                                                                                                                                                                                                                                                                                                                                                                                                                                                                                                                                                                                                                                                                                                                                                                                                                                                                                                                                                                                                                                                                                                                                                                                                                                                                                                                                                                                                                                                                                                                                                                                                                                                                                                                                                                                                                                                                                                                                                                                                                                                                                                                                                                                                                                                                                                                                                                                                                                                                                                                                                                                                                                                                                                                                                                                                                                                                                                                                                                                       | Dr. Bhatt laboratory, Rajkot                                                                                         | Gujarat Biotechnology Research Centre                                                                                                                                                                              | Akhilesh Modi; Apurvashin Puvar; Bhadrashinh Gohil; Chaitanya Joshi; Disha Vora; Janvi Raval; Jaykumar Rangani; Madhvi Joshi; Nimesh Patel; Nitin Savaliya; NitinShukla; Priyank Chavda; Ramesh Pandit; Roshani Mishra; Sonal Sharma; Tasnim Trivedi; Zarna Patel                                                                                                                                                                                                                                                                                                                                                                                                                                                                                                                                                                                                                                                                                                                              |
| EPI_ISL_9323178                                                                                                                                                                                                                                                                                                                                                                                                                                                                                                                                                                                                                                                                                                                                                                                                                                                                                                                                                                                                                                                                                                                                                                                                                                                                                                                                                                                                                                                                                                                                                                                                                                                                                                                                                                                                                                                                                                                                                                                                                                                                                                                                                                                                                                                                                                                                                                                                                                                                                                                                                                                                                                                                                                                                                                                                                                                                                                                                                                                                                                                                                                                                                                                                                                                                                                                                                                                                                                                                                                                                                                                                                                                                                                                                                                                                                                                                                                                                                                                                                                                                                                                                                                                                                                                                                                                                                                                                                                                                                                                                                                                                                                                                                                                                                                                                                                                                                                                                                                                                                                                                                                                                                                                                                                                                                                                                                                                                                                                                                                                                                                                                                                                                                                                                                                                                                                                                                                                                                                                                                                                                                                                                                                                                                                                                                                                                                                                                                                                                                                                                                                                                                                                                                                                                                                                                                                                                                                                                                                                                                                                                                                                                                                                                                                                                                                                                                                                                                                                                                                                                                                                                                                                                                                                                                                                                                                                                                                                                                                                                                                                                                                                                                                                                                                                                                                                                                                                                                                                                                                                                                                                                                                                                                                                                                                                                                                                                                                                                                                                                                                                                                                                                                                                                                                                                                                                                                                                                                                                                                                                                                                                                                                                                                                                                                                                                                                                                                                                                                                                                                                                                       | Dr. Rafael S. Tumbokon Memorial Hospital                                                                             | Philippine Genome Center                                                                                                                                                                                           | Alethea R. de Guzman; Alyssa Joyce E. Telles; Angelica A. Garcia; Anna Ong-Lim; Benedict A. Maralit; Carlo M. Lapid; Celia Carlos; Cynthia P. Saloma; Devon Ray Pacial; Diomedes A. Cariño; Edsel Maurice Salvana; El King D. Morado; Elcid Aaron R. Pangilian; Eva Maria Cutiongco-de la Paz; Francis A. Tablizo; Henrietta Marie Rodriguez; Jaime C. Montoya; Jan Michael C. Yap; Jarvin E. Nipales; Jo-Hannah S. Llamas; John Michael Egan; John Q. Wong; Johnny A. Ong; Joshua Gregor A. Dizon; Joshua Jose Endozo; Karol Sophia Agape R. Padilla; Kris P. Punayan; Kristina Patriz Dela Cruz; Lindsay Clare D. L. Carandang; Ma. Exanii Plantig; Marc Edsel C. Ayes; Maria Rosario Singh-Vergeire; Maria Sofia L. Yangzon; Marielle M. Gamboa; Marissa Alejandria; Niña Francesca Bustamante; Razel Nikka M. Hao; Renato Jacinto Q. Mantaring; Rianna Patricia S. Cruz; Razel A. Medina; Shiela Mae M. Araiza; Yvonne Valerie Austria; Zipporah Mariebelle R. Enriquez; Zryel V. Mollejon |
| EPI_ISL_8929068, EPI_ISL_8929078                                                                                                                                                                                                                                                                                                                                                                                                                                                                                                                                                                                                                                                                                                                                                                                                                                                                                                                                                                                                                                                                                                                                                                                                                                                                                                                                                                                                                                                                                                                                                                                                                                                                                                                                                                                                                                                                                                                                                                                                                                                                                                                                                                                                                                                                                                                                                                                                                                                                                                                                                                                                                                                                                                                                                                                                                                                                                                                                                                                                                                                                                                                                                                                                                                                                                                                                                                                                                                                                                                                                                                                                                                                                                                                                                                                                                                                                                                                                                                                                                                                                                                                                                                                                                                                                                                                                                                                                                                                                                                                                                                                                                                                                                                                                                                                                                                                                                                                                                                                                                                                                                                                                                                                                                                                                                                                                                                                                                                                                                                                                                                                                                                                                                                                                                                                                                                                                                                                                                                                                                                                                                                                                                                                                                                                                                                                                                                                                                                                                                                                                                                                                                                                                                                                                                                                                                                                                                                                                                                                                                                                                                                                                                                                                                                                                                                                                                                                                                                                                                                                                                                                                                                                                                                                                                                                                                                                                                                                                                                                                                                                                                                                                                                                                                                                                                                                                                                                                                                                                                                                                                                                                                                                                                                                                                                                                                                                                                                                                                                                                                                                                                                                                                                                                                                                                                                                                                                                                                                                                                                                                                                                                                                                                                                                                                                                                                                                                                                                                                                                                                                                      | Dutch COVID-19 response team                                                                                         | Medical Microbiology, Maastricht University Medical Centre                                                                                                                                                         | Brian van der Veer*; Carmen Reumkens; Christian Hoeb; Erik Beuken; Jozef Dingemans*; Lieke van Alphen; Paul Savekoul                                                                                                                                                                                                                                                                                                                                                                                                                                                                                                                                                                                                                                                                                                                                                                                                                                                                           |
| EPI_ISL_9085212, EPI_ISL_9085213, EPI_ISL_9085214, EPI_ISL_9085215, EPI_ISL_9085216, EPI_ISL_9085217, EPI_ISL_9085219, EPI_ISL_9085220, EPI_ISL_9184920, EPI_ISL_9185241, EPI_ISL_9185683, EPI_ISL_9185710, EPI_ISL_9531095, EPI_ISL_9531429, EPI_ISL_9531437                                                                                                                                                                                                                                                                                                                                                                                                                                                                                                                                                                                                                                                                                                                                                                                                                                                                                                                                                                                                                                                                                                                                                                                                                                                                                                                                                                                                                                                                                                                                                                                                                                                                                                                                                                                                                                                                                                                                                                                                                                                                                                                                                                                                                                                                                                                                                                                                                                                                                                                                                                                                                                                                                                                                                                                                                                                                                                                                                                                                                                                                                                                                                                                                                                                                                                                                                                                                                                                                                                                                                                                                                                                                                                                                                                                                                                                                                                                                                                                                                                                                                                                                                                                                                                                                                                                                                                                                                                                                                                                                                                                                                                                                                                                                                                                                                                                                                                                                                                                                                                                                                                                                                                                                                                                                                                                                                                                                                                                                                                                                                                                                                                                                                                                                                                                                                                                                                                                                                                                                                                                                                                                                                                                                                                                                                                                                                                                                                                                                                                                                                                                                                                                                                                                                                                                                                                                                                                                                                                                                                                                                                                                                                                                                                                                                                                                                                                                                                                                                                                                                                                                                                                                                                                                                                                                                                                                                                                                                                                                                                                                                                                                                                                                                                                                                                                                                                                                                                                                                                                                                                                                                                                                                                                                                                                                                                                                                                                                                                                                                                                                                                                                                                                                                                                                                                                                                                                                                                                                                                                                                                                                                                                                                                                                                                                                                                         | see above                                                                                                            | Dutch COVID-19 response team                                                                                                                                                                                       | National Institute for Public Health and the Environment (RIVM)                                                                                                                                                                                                                                                                                                                                                                                                                                                                                                                                                                                                                                                                                                                                                                                                                                                                                                                                |
| EPI_ISL_9201671, EPI_ISL_9201673                                                                                                                                                                                                                                                                                                                                                                                                                                                                                                                                                                                                                                                                                                                                                                                                                                                                                                                                                                                                                                                                                                                                                                                                                                                                                                                                                                                                                                                                                                                                                                                                                                                                                                                                                                                                                                                                                                                                                                                                                                                                                                                                                                                                                                                                                                                                                                                                                                                                                                                                                                                                                                                                                                                                                                                                                                                                                                                                                                                                                                                                                                                                                                                                                                                                                                                                                                                                                                                                                                                                                                                                                                                                                                                                                                                                                                                                                                                                                                                                                                                                                                                                                                                                                                                                                                                                                                                                                                                                                                                                                                                                                                                                                                                                                                                                                                                                                                                                                                                                                                                                                                                                                                                                                                                                                                                                                                                                                                                                                                                                                                                                                                                                                                                                                                                                                                                                                                                                                                                                                                                                                                                                                                                                                                                                                                                                                                                                                                                                                                                                                                                                                                                                                                                                                                                                                                                                                                                                                                                                                                                                                                                                                                                                                                                                                                                                                                                                                                                                                                                                                                                                                                                                                                                                                                                                                                                                                                                                                                                                                                                                                                                                                                                                                                                                                                                                                                                                                                                                                                                                                                                                                                                                                                                                                                                                                                                                                                                                                                                                                                                                                                                                                                                                                                                                                                                                                                                                                                                                                                                                                                                                                                                                                                                                                                                                                                                                                                                                                                                                                                                      | EDENDALE HOSPITAL                                                                                                    | National Institute for Communicable Diseases of the National Health Laboratory Service                                                                                                                             | Adam Meijer; Afke Vogelzang; AnneMarie van den Brandt; Annelies Kroneman; Bas van der Veer; Chantal Reusken; Dennis Schmitz; Dirk Eggink; Florian Zwagemaker; Harry Vennema; Ivo van Walle; Jeroen Cremer; Jil Kocken; Jordy de Bakker; Karim Hajji; Kim Freriks; Linda van Someren; Lisa Wijsman; Lynn Aarts; Ryanne Jaarsma; Sanne Bos; Sharon van den Brink; on behalf of the national COVID-19 response team                                                                                                                                                                                                                                                                                                                                                                                                                                                                                                                                                                               |
| EPI_ISL_9679594                                                                                                                                                                                                                                                                                                                                                                                                                                                                                                                                                                                                                                                                                                                                                                                                                                                                                                                                                                                                                                                                                                                                                                                                                                                                                                                                                                                                                                                                                                                                                                                                                                                                                                                                                                                                                                                                                                                                                                                                                                                                                                                                                                                                                                                                                                                                                                                                                                                                                                                                                                                                                                                                                                                                                                                                                                                                                                                                                                                                                                                                                                                                                                                                                                                                                                                                                                                                                                                                                                                                                                                                                                                                                                                                                                                                                                                                                                                                                                                                                                                                                                                                                                                                                                                                                                                                                                                                                                                                                                                                                                                                                                                                                                                                                                                                                                                                                                                                                                                                                                                                                                                                                                                                                                                                                                                                                                                                                                                                                                                                                                                                                                                                                                                                                                                                                                                                                                                                                                                                                                                                                                                                                                                                                                                                                                                                                                                                                                                                                                                                                                                                                                                                                                                                                                                                                                                                                                                                                                                                                                                                                                                                                                                                                                                                                                                                                                                                                                                                                                                                                                                                                                                                                                                                                                                                                                                                                                                                                                                                                                                                                                                                                                                                                                                                                                                                                                                                                                                                                                                                                                                                                                                                                                                                                                                                                                                                                                                                                                                                                                                                                                                                                                                                                                                                                                                                                                                                                                                                                                                                                                                                                                                                                                                                                                                                                                                                                                                                                                                                                                                                       | ERMELO LABORATORY                                                                                                    | National Institute for Communicable Diseases of the National Health Laboratory Service                                                                                                                             | Amoako DG; Bhiman JN; Everatt J; Ismail A; Kekana D; Mahlangu B; Mnguni A; Mohale T; Ntuli N; Scheepers C; Wolter N                                                                                                                                                                                                                                                                                                                                                                                                                                                                                                                                                                                                                                                                                                                                                                                                                                                                            |
| EPI_ISL_8798891, EPI_ISL_8798892, EPI_ISL_8798893, EPI_ISL_8798894, EPI_ISL_8798895, EPI_ISL_8798896, EPI_ISL_8798897, EPI_ISL_8798898, EPI_ISL_8798899                                                                                                                                                                                                                                                                                                                                                                                                                                                                                                                                                                                                                                                                                                                                                                                                                                                                                                                                                                                                                                                                                                                                                                                                                                                                                                                                                                                                                                                                                                                                                                                                                                                                                                                                                                                                                                                                                                                                                                                                                                                                                                                                                                                                                                                                                                                                                                                                                                                                                                                                                                                                                                                                                                                                                                                                                                                                                                                                                                                                                                                                                                                                                                                                                                                                                                                                                                                                                                                                                                                                                                                                                                                                                                                                                                                                                                                                                                                                                                                                                                                                                                                                                                                                                                                                                                                                                                                                                                                                                                                                                                                                                                                                                                                                                                                                                                                                                                                                                                                                                                                                                                                                                                                                                                                                                                                                                                                                                                                                                                                                                                                                                                                                                                                                                                                                                                                                                                                                                                                                                                                                                                                                                                                                                                                                                                                                                                                                                                                                                                                                                                                                                                                                                                                                                                                                                                                                                                                                                                                                                                                                                                                                                                                                                                                                                                                                                                                                                                                                                                                                                                                                                                                                                                                                                                                                                                                                                                                                                                                                                                                                                                                                                                                                                                                                                                                                                                                                                                                                                                                                                                                                                                                                                                                                                                                                                                                                                                                                                                                                                                                                                                                                                                                                                                                                                                                                                                                                                                                                                                                                                                                                                                                                                                                                                                                                                                                                                                                               | see above                                                                                                            | ESCENT DIAGNOSTICS PVT. LTD.                                                                                                                                                                                       | INSACOG-IBSD Manipur                                                                                                                                                                                                                                                                                                                                                                                                                                                                                                                                                                                                                                                                                                                                                                                                                                                                                                                                                                           |
| EPI_ISL_9806227, EPI_ISL_9807090, EPI_ISL_9807435, EPI_ISL_9807669, EPI_ISL_9808390, EPI_ISL_9808396, EPI_ISL_9808457, EPI_ISL_9808639                                                                                                                                                                                                                                                                                                                                                                                                                                                                                                                                                                                                                                                                                                                                                                                                                                                                                                                                                                                                                                                                                                                                                                                                                                                                                                                                                                                                                                                                                                                                                                                                                                                                                                                                                                                                                                                                                                                                                                                                                                                                                                                                                                                                                                                                                                                                                                                                                                                                                                                                                                                                                                                                                                                                                                                                                                                                                                                                                                                                                                                                                                                                                                                                                                                                                                                                                                                                                                                                                                                                                                                                                                                                                                                                                                                                                                                                                                                                                                                                                                                                                                                                                                                                                                                                                                                                                                                                                                                                                                                                                                                                                                                                                                                                                                                                                                                                                                                                                                                                                                                                                                                                                                                                                                                                                                                                                                                                                                                                                                                                                                                                                                                                                                                                                                                                                                                                                                                                                                                                                                                                                                                                                                                                                                                                                                                                                                                                                                                                                                                                                                                                                                                                                                                                                                                                                                                                                                                                                                                                                                                                                                                                                                                                                                                                                                                                                                                                                                                                                                                                                                                                                                                                                                                                                                                                                                                                                                                                                                                                                                                                                                                                                                                                                                                                                                                                                                                                                                                                                                                                                                                                                                                                                                                                                                                                                                                                                                                                                                                                                                                                                                                                                                                                                                                                                                                                                                                                                                                                                                                                                                                                                                                                                                                                                                                                                                                                                                                                                | see above                                                                                                            | EXCITE Lab                                                                                                                                                                                                         | Andersen lab at Scripps Research                                                                                                                                                                                                                                                                                                                                                                                                                                                                                                                                                                                                                                                                                                                                                                                                                                                                                                                                                               |
| EPI_ISL_9323334, EPI_ISL_9323335, EPI_ISL_9323336, EPI_ISL_9323337, EPI_ISL_9323338, EPI_ISL_9323340, EPI_ISL_9323341, EPI_ISL_9323342, EPI_ISL_9323343, EPI_ISL_9323344, EPI_ISL_9323345, EPI_ISL_9323346, EPI_ISL_9323347, EPI_ISL_9323349, EPI_ISL_9323350, EPI_ISL_9323351, EPI_ISL_9323352, EPI_ISL_9323353, EPI_ISL_9323354, EPI_ISL_9323355, EPI_ISL_9323356, EPI_ISL_9323357                                                                                                                                                                                                                                                                                                                                                                                                                                                                                                                                                                                                                                                                                                                                                                                                                                                                                                                                                                                                                                                                                                                                                                                                                                                                                                                                                                                                                                                                                                                                                                                                                                                                                                                                                                                                                                                                                                                                                                                                                                                                                                                                                                                                                                                                                                                                                                                                                                                                                                                                                                                                                                                                                                                                                                                                                                                                                                                                                                                                                                                                                                                                                                                                                                                                                                                                                                                                                                                                                                                                                                                                                                                                                                                                                                                                                                                                                                                                                                                                                                                                                                                                                                                                                                                                                                                                                                                                                                                                                                                                                                                                                                                                                                                                                                                                                                                                                                                                                                                                                                                                                                                                                                                                                                                                                                                                                                                                                                                                                                                                                                                                                                                                                                                                                                                                                                                                                                                                                                                                                                                                                                                                                                                                                                                                                                                                                                                                                                                                                                                                                                                                                                                                                                                                                                                                                                                                                                                                                                                                                                                                                                                                                                                                                                                                                                                                                                                                                                                                                                                                                                                                                                                                                                                                                                                                                                                                                                                                                                                                                                                                                                                                                                                                                                                                                                                                                                                                                                                                                                                                                                                                                                                                                                                                                                                                                                                                                                                                                                                                                                                                                                                                                                                                                                                                                                                                                                                                                                                                                                                                                                                                                                                                                                  | see above                                                                                                            | Eastern Visayas Regional Medical Center                                                                                                                                                                            | Philippine Genome Center                                                                                                                                                                                                                                                                                                                                                                                                                                                                                                                                                                                                                                                                                                                                                                                                                                                                                                                                                                       |
| EPI_ISL_9501570, EPI_ISL_9501662, EPI_ISL_9501891, EPI_ISL_9800873                                                                                                                                                                                                                                                                                                                                                                                                                                                                                                                                                                                                                                                                                                                                                                                                                                                                                                                                                                                                                                                                                                                                                                                                                                                                                                                                                                                                                                                                                                                                                                                                                                                                                                                                                                                                                                                                                                                                                                                                                                                                                                                                                                                                                                                                                                                                                                                                                                                                                                                                                                                                                                                                                                                                                                                                                                                                                                                                                                                                                                                                                                                                                                                                                                                                                                                                                                                                                                                                                                                                                                                                                                                                                                                                                                                                                                                                                                                                                                                                                                                                                                                                                                                                                                                                                                                                                                                                                                                                                                                                                                                                                                                                                                                                                                                                                                                                                                                                                                                                                                                                                                                                                                                                                                                                                                                                                                                                                                                                                                                                                                                                                                                                                                                                                                                                                                                                                                                                                                                                                                                                                                                                                                                                                                                                                                                                                                                                                                                                                                                                                                                                                                                                                                                                                                                                                                                                                                                                                                                                                                                                                                                                                                                                                                                                                                                                                                                                                                                                                                                                                                                                                                                                                                                                                                                                                                                                                                                                                                                                                                                                                                                                                                                                                                                                                                                                                                                                                                                                                                                                                                                                                                                                                                                                                                                                                                                                                                                                                                                                                                                                                                                                                                                                                                                                                                                                                                                                                                                                                                                                                                                                                                                                                                                                                                                                                                                                                                                                                                                                                    | Edmonton Provincial Lab                                                                                              | Alberta Precision Labs (APL)                                                                                                                                                                                       | Buss; Croxen M; Deo A; Dieu P; E; Ferrato C; Gill K; Koleva P; Li V; Lloyd C; Lynch T; Ma R; Murphy S; Pabbaraju K; Shideler S.; Shokoples S; Skitsko T; Thayer J; Tipples G; Wong A; Yu C; Zelyas N                                                                                                                                                                                                                                                                                                                                                                                                                                                                                                                                                                                                                                                                                                                                                                                           |
| EPI_ISL_8847242, EPI_ISL_9197113, EPI_ISL_9197235, EPI_ISL_9197406                                                                                                                                                                                                                                                                                                                                                                                                                                                                                                                                                                                                                                                                                                                                                                                                                                                                                                                                                                                                                                                                                                                                                                                                                                                                                                                                                                                                                                                                                                                                                                                                                                                                                                                                                                                                                                                                                                                                                                                                                                                                                                                                                                                                                                                                                                                                                                                                                                                                                                                                                                                                                                                                                                                                                                                                                                                                                                                                                                                                                                                                                                                                                                                                                                                                                                                                                                                                                                                                                                                                                                                                                                                                                                                                                                                                                                                                                                                                                                                                                                                                                                                                                                                                                                                                                                                                                                                                                                                                                                                                                                                                                                                                                                                                                                                                                                                                                                                                                                                                                                                                                                                                                                                                                                                                                                                                                                                                                                                                                                                                                                                                                                                                                                                                                                                                                                                                                                                                                                                                                                                                                                                                                                                                                                                                                                                                                                                                                                                                                                                                                                                                                                                                                                                                                                                                                                                                                                                                                                                                                                                                                                                                                                                                                                                                                                                                                                                                                                                                                                                                                                                                                                                                                                                                                                                                                                                                                                                                                                                                                                                                                                                                                                                                                                                                                                                                                                                                                                                                                                                                                                                                                                                                                                                                                                                                                                                                                                                                                                                                                                                                                                                                                                                                                                                                                                                                                                                                                                                                                                                                                                                                                                                                                                                                                                                                                                                                                                                                                                                                                    | Edmonton Provincial Lab                                                                                              | Public Health Agency of Canada (PHAC) National Microbiology Laboratory                                                                                                                                             | Buss; Croxen M; Deo A; Dieu P; E; Ferrato C; Gill K; Khan F; Koleva P; Li V; Lloyd C; Lynch T; Ma R; Murphy S; Pabbaraju K; Shideler S.; Shokoples S; Skitsko T; Thayer J; Tipples G; Whitehouse M; Wong A; Yu C; Zelyas N                                                                                                                                                                                                                                                                                                                                                                                                                                                                                                                                                                                                                                                                                                                                                                     |
| EPI_ISL_9212147                                                                                                                                                                                                                                                                                                                                                                                                                                                                                                                                                                                                                                                                                                                                                                                                                                                                                                                                                                                                                                                                                                                                                                                                                                                                                                                                                                                                                                                                                                                                                                                                                                                                                                                                                                                                                                                                                                                                                                                                                                                                                                                                                                                                                                                                                                                                                                                                                                                                                                                                                                                                                                                                                                                                                                                                                                                                                                                                                                                                                                                                                                                                                                                                                                                                                                                                                                                                                                                                                                                                                                                                                                                                                                                                                                                                                                                                                                                                                                                                                                                                                                                                                                                                                                                                                                                                                                                                                                                                                                                                                                                                                                                                                                                                                                                                                                                                                                                                                                                                                                                                                                                                                                                                                                                                                                                                                                                                                                                                                                                                                                                                                                                                                                                                                                                                                                                                                                                                                                                                                                                                                                                                                                                                                                                                                                                                                                                                                                                                                                                                                                                                                                                                                                                                                                                                                                                                                                                                                                                                                                                                                                                                                                                                                                                                                                                                                                                                                                                                                                                                                                                                                                                                                                                                                                                                                                                                                                                                                                                                                                                                                                                                                                                                                                                                                                                                                                                                                                                                                                                                                                                                                                                                                                                                                                                                                                                                                                                                                                                                                                                                                                                                                                                                                                                                                                                                                                                                                                                                                                                                                                                                                                                                                                                                                                                                                                                                                                                                                                                                                                                                       | Ehime Prefectural Institute of Public Health and Environmental Science                                               | Ehime Prefectural Institute of Public Health and Environmental Science                                                                                                                                             | Chihiro Nakanishi; Chitoshi Toyoshima; Hiromi Iwaki; Hiroto Shinomiya; Kentaro Itokawa; Makoto Kuroda; Masanori Hashino; Naritoshi Bandou; Noriko Aoki; Rina Tanaka; Tsuyoshi Sekizuka; Yasutaka Yamashita                                                                                                                                                                                                                                                                                                                                                                                                                                                                                                                                                                                                                                                                                                                                                                                     |
| EPI_ISL_8814765, EPI_ISL_9030999, EPI_ISL_9031008                                                                                                                                                                                                                                                                                                                                                                                                                                                                                                                                                                                                                                                                                                                                                                                                                                                                                                                                                                                                                                                                                                                                                                                                                                                                                                                                                                                                                                                                                                                                                                                                                                                                                                                                                                                                                                                                                                                                                                                                                                                                                                                                                                                                                                                                                                                                                                                                                                                                                                                                                                                                                                                                                                                                                                                                                                                                                                                                                                                                                                                                                                                                                                                                                                                                                                                                                                                                                                                                                                                                                                                                                                                                                                                                                                                                                                                                                                                                                                                                                                                                                                                                                                                                                                                                                                                                                                                                                                                                                                                                                                                                                                                                                                                                                                                                                                                                                                                                                                                                                                                                                                                                                                                                                                                                                                                                                                                                                                                                                                                                                                                                                                                                                                                                                                                                                                                                                                                                                                                                                                                                                                                                                                                                                                                                                                                                                                                                                                                                                                                                                                                                                                                                                                                                                                                                                                                                                                                                                                                                                                                                                                                                                                                                                                                                                                                                                                                                                                                                                                                                                                                                                                                                                                                                                                                                                                                                                                                                                                                                                                                                                                                                                                                                                                                                                                                                                                                                                                                                                                                                                                                                                                                                                                                                                                                                                                                                                                                                                                                                                                                                                                                                                                                                                                                                                                                                                                                                                                                                                                                                                                                                                                                                                                                                                                                                                                                                                                                                                                                                                                     | Ender Diagnostics AG                                                                                                 | Dr Risch Laboratory                                                                                                                                                                                                | Dominique Fabien Hilti; Faina Wehrli; Lorenz Risch; Martin Risch; Nadia Wohlwend; Sinem Kas; Thomas Bodmer                                                                                                                                                                                                                                                                                                                                                                                                                                                                                                                                                                                                                                                                                                                                                                                                                                                                                     |
| EPI_ISL_9554083, EPI_ISL_9554084                                                                                                                                                                                                                                                                                                                                                                                                                                                                                                                                                                                                                                                                                                                                                                                                                                                                                                                                                                                                                                                                                                                                                                                                                                                                                                                                                                                                                                                                                                                                                                                                                                                                                                                                                                                                                                                                                                                                                                                                                                                                                                                                                                                                                                                                                                                                                                                                                                                                                                                                                                                                                                                                                                                                                                                                                                                                                                                                                                                                                                                                                                                                                                                                                                                                                                                                                                                                                                                                                                                                                                                                                                                                                                                                                                                                                                                                                                                                                                                                                                                                                                                                                                                                                                                                                                                                                                                                                                                                                                                                                                                                                                                                                                                                                                                                                                                                                                                                                                                                                                                                                                                                                                                                                                                                                                                                                                                                                                                                                                                                                                                                                                                                                                                                                                                                                                                                                                                                                                                                                                                                                                                                                                                                                                                                                                                                                                                                                                                                                                                                                                                                                                                                                                                                                                                                                                                                                                                                                                                                                                                                                                                                                                                                                                                                                                                                                                                                                                                                                                                                                                                                                                                                                                                                                                                                                                                                                                                                                                                                                                                                                                                                                                                                                                                                                                                                                                                                                                                                                                                                                                                                                                                                                                                                                                                                                                                                                                                                                                                                                                                                                                                                                                                                                                                                                                                                                                                                                                                                                                                                                                                                                                                                                                                                                                                                                                                                                                                                                                                                                                                      | Enfer                                                                                                                | Enfer                                                                                                                                                                                                              | Elaine M. Kenny; Suzie Coughlan                                                                                                                                                                                                                                                                                                                                                                                                                                                                                                                                                                                                                                                                                                                                                                                                                                                                                                                                                                |
| EPI_ISL_9368552                                                                                                                                                                                                                                                                                                                                                                                                                                                                                                                                                                                                                                                                                                                                                                                                                                                                                                                                                                                                                                                                                                                                                                                                                                                                                                                                                                                                                                                                                                                                                                                                                                                                                                                                                                                                                                                                                                                                                                                                                                                                                                                                                                                                                                                                                                                                                                                                                                                                                                                                                                                                                                                                                                                                                                                                                                                                                                                                                                                                                                                                                                                                                                                                                                                                                                                                                                                                                                                                                                                                                                                                                                                                                                                                                                                                                                                                                                                                                                                                                                                                                                                                                                                                                                                                                                                                                                                                                                                                                                                                                                                                                                                                                                                                                                                                                                                                                                                                                                                                                                                                                                                                                                                                                                                                                                                                                                                                                                                                                                                                                                                                                                                                                                                                                                                                                                                                                                                                                                                                                                                                                                                                                                                                                                                                                                                                                                                                                                                                                                                                                                                                                                                                                                                                                                                                                                                                                                                                                                                                                                                                                                                                                                                                                                                                                                                                                                                                                                                                                                                                                                                                                                                                                                                                                                                                                                                                                                                                                                                                                                                                                                                                                                                                                                                                                                                                                                                                                                                                                                                                                                                                                                                                                                                                                                                                                                                                                                                                                                                                                                                                                                                                                                                                                                                                                                                                                                                                                                                                                                                                                                                                                                                                                                                                                                                                                                                                                                                                                                                                                                                                       | EspaceBio Laboratoire                                                                                                | Department of Virology, Henri Mondor University Hospital, Assistance Publique Hôpitaux de Paris, Université Paris-Est Créteil, INSERM U955                                                                         | Alexandre Soulier; Christophe Rodriguez; Elisabeth Trawinski; Guillaume Gricourt; Jean-Michel Pawlotsky; Melissa N'Debji; Slim Fourati; Vanessa Demontant                                                                                                                                                                                                                                                                                                                                                                                                                                                                                                                                                                                                                                                                                                                                                                                                                                      |
| EPI_ISL_9067513                                                                                                                                                                                                                                                                                                                                                                                                                                                                                                                                                                                                                                                                                                                                                                                                                                                                                                                                                                                                                                                                                                                                                                                                                                                                                                                                                                                                                                                                                                                                                                                                                                                                                                                                                                                                                                                                                                                                                                                                                                                                                                                                                                                                                                                                                                                                                                                                                                                                                                                                                                                                                                                                                                                                                                                                                                                                                                                                                                                                                                                                                                                                                                                                                                                                                                                                                                                                                                                                                                                                                                                                                                                                                                                                                                                                                                                                                                                                                                                                                                                                                                                                                                                                                                                                                                                                                                                                                                                                                                                                                                                                                                                                                                                                                                                                                                                                                                                                                                                                                                                                                                                                                                                                                                                                                                                                                                                                                                                                                                                                                                                                                                                                                                                                                                                                                                                                                                                                                                                                                                                                                                                                                                                                                                                                                                                                                                                                                                                                                                                                                                                                                                                                                                                                                                                                                                                                                                                                                                                                                                                                                                                                                                                                                                                                                                                                                                                                                                                                                                                                                                                                                                                                                                                                                                                                                                                                                                                                                                                                                                                                                                                                                                                                                                                                                                                                                                                                                                                                                                                                                                                                                                                                                                                                                                                                                                                                                                                                                                                                                                                                                                                                                                                                                                                                                                                                                                                                                                                                                                                                                                                                                                                                                                                                                                                                                                                                                                                                                                                                                                                                       | Faculty Hospital Bulovka, Department of Clinical Microbiology                                                        | Charles University, Faculty of Science, BIOCEV, OMICs Genomics                                                                                                                                                     | Alžběta Bučková; Blanka Hamplová; Ingrid Poláková; Nela Václaviková; Ruth Tachezy; Sebastian Cristian Treitli; Vladimír Hampel; Zoltán Füsty; Štěpánka Hrdá                                                                                                                                                                                                                                                                                                                                                                                                                                                                                                                                                                                                                                                                                                                                                                                                                                    |
| EPI_ISL_9324429                                                                                                                                                                                                                                                                                                                                                                                                                                                                                                                                                                                                                                                                                                                                                                                                                                                                                                                                                                                                                                                                                                                                                                                                                                                                                                                                                                                                                                                                                                                                                                                                                                                                                                                                                                                                                                                                                                                                                                                                                                                                                                                                                                                                                                                                                                                                                                                                                                                                                                                                                                                                                                                                                                                                                                                                                                                                                                                                                                                                                                                                                                                                                                                                                                                                                                                                                                                                                                                                                                                                                                                                                                                                                                                                                                                                                                                                                                                                                                                                                                                                                                                                                                                                                                                                                                                                                                                                                                                                                                                                                                                                                                                                                                                                                                                                                                                                                                                                                                                                                                                                                                                                                                                                                                                                                                                                                                                                                                                                                                                                                                                                                                                                                                                                                                                                                                                                                                                                                                                                                                                                                                                                                                                                                                                                                                                                                                                                                                                                                                                                                                                                                                                                                                                                                                                                                                                                                                                                                                                                                                                                                                                                                                                                                                                                                                                                                                                                                                                                                                                                                                                                                                                                                                                                                                                                                                                                                                                                                                                                                                                                                                                                                                                                                                                                                                                                                                                                                                                                                                                                                                                                                                                                                                                                                                                                                                                                                                                                                                                                                                                                                                                                                                                                                                                                                                                                                                                                                                                                                                                                                                                                                                                                                                                                                                                                                                                                                                                                                                                                                                                                       | First Aide Diagnostic Center                                                                                         | Philippine Genome Center                                                                                                                                                                                           | Alethea R. de Guzman; Alyssa Joyce E. Telles; Angelica A. Garcia; Anna Ong-Lim; Benedict A. Maralit; Carlo M. Lapid; Celia Carlos; Cynthia P. Saloma; Devon Ray Pacial; Diomedes A. Cariño; Edsel Maurice Salvana; El King D. Morado; Elcid Aaron R. Pangilian; Eva Maria Cutiongco-de la Paz; Francis A. Tablizo; Henrietta Marie Rodriguez; Jaime C. Montoya; Jan Michael C. Yap; Jarvin E. Nipales; Jo-Hannah S. Llamas; John Michael Egan; John Q. Wong; Johnny A. Ong; Joshua Gregor A. Dizon; Joshua Jose Endozo; Karol Sophia Agape R. Padilla; Kris P. Punayan; Kristina Patriz Dela Cruz; Lindsay Clare D. L. Carandang; Ma. Exanii Plantig; Marc Edsel C. Ayes; Maria Rosario Singh-Vergeire; Maria Sofia L. Yangzon; Marielle M. Gamboa; Marissa Alejandria; Niña Francesca Bustamante; Razel Nikka M. Hao; Renato Jacinto Q. Mantaring; Rianna Patricia S. Cruz; Razel A. Medina; Shiela Mae M. Araiza; Yvonne Valerie Austria; Zipporah Mariebelle R. Enriquez; Zryel V. Mollejon |
| EPI_ISL_9232919                                                                                                                                                                                                                                                                                                                                                                                                                                                                                                                                                                                                                                                                                                                                                                                                                                                                                                                                                                                                                                                                                                                                                                                                                                                                                                                                                                                                                                                                                                                                                                                                                                                                                                                                                                                                                                                                                                                                                                                                                                                                                                                                                                                                                                                                                                                                                                                                                                                                                                                                                                                                                                                                                                                                                                                                                                                                                                                                                                                                                                                                                                                                                                                                                                                                                                                                                                                                                                                                                                                                                                                                                                                                                                                                                                                                                                                                                                                                                                                                                                                                                                                                                                                                                                                                                                                                                                                                                                                                                                                                                                                                                                                                                                                                                                                                                                                                                                                                                                                                                                                                                                                                                                                                                                                                                                                                                                                                                                                                                                                                                                                                                                                                                                                                                                                                                                                                                                                                                                                                                                                                                                                                                                                                                                                                                                                                                                                                                                                                                                                                                                                                                                                                                                                                                                                                                                                                                                                                                                                                                                                                                                                                                                                                                                                                                                                                                                                                                                                                                                                                                                                                                                                                                                                                                                                                                                                                                                                                                                                                                                                                                                                                                                                                                                                                                                                                                                                                                                                                                                                                                                                                                                                                                                                                                                                                                                                                                                                                                                                                                                                                                                                                                                                                                                                                                                                                                                                                                                                                                                                                                                                                                                                                                                                                                                                                                                                                                                                                                                                                                                                                       | Fukuoka City Institute of Health and Environment                                                                     | Fukuoka City Institute of Health and Environment                                                                                                                                                                   | Chinami Wasano; Kentaro Itokawa; Makoto Kuroda; Masanori Hashino; Michihiko Miyamoto; Misaki Matsudaira; Musashi Sanui; Rina Tanaka; Shohei Noguchi; Tsuyoshi Sekizuka; Yukiko Sano                                                                                                                                                                                                                                                                                                                                                                                                                                                                                                                                                                                                                                                                                                                                                                                                            |
| EPI_ISL_8833436, EPI_ISL_8868415                                                                                                                                                                                                                                                                                                                                                                                                                                                                                                                                                                                                                                                                                                                                                                                                                                                                                                                                                                                                                                                                                                                                                                                                                                                                                                                                                                                                                                                                                                                                                                                                                                                                                                                                                                                                                                                                                                                                                                                                                                                                                                                                                                                                                                                                                                                                                                                                                                                                                                                                                                                                                                                                                                                                                                                                                                                                                                                                                                                                                                                                                                                                                                                                                                                                                                                                                                                                                                                                                                                                                                                                                                                                                                                                                                                                                                                                                                                                                                                                                                                                                                                                                                                                                                                                                                                                                                                                                                                                                                                                                                                                                                                                                                                                                                                                                                                                                                                                                                                                                                                                                                                                                                                                                                                                                                                                                                                                                                                                                                                                                                                                                                                                                                                                                                                                                                                                                                                                                                                                                                                                                                                                                                                                                                                                                                                                                                                                                                                                                                                                                                                                                                                                                                                                                                                                                                                                                                                                                                                                                                                                                                                                                                                                                                                                                                                                                                                                                                                                                                                                                                                                                                                                                                                                                                                                                                                                                                                                                                                                                                                                                                                                                                                                                                                                                                                                                                                                                                                                                                                                                                                                                                                                                                                                                                                                                                                                                                                                                                                                                                                                                                                                                                                                                                                                                                                                                                                                                                                                                                                                                                                                                                                                                                                                                                                                                                                                                                                                                                                                                                                      | Fulgent Genetics                                                                                                     | Centers for Disease Control and Prevention Division of Viral Diseases, Pathogen Discovery                                                                                                                          | Becky Tsai; Benafsh Sapra; Benjamin Rambo-Martin; Christopher Gulvick; Clinton Paden; Dakota Howard; Dhwanj Batra; Doreen Ng; Duncan MacCannell; Erisa Sula; Harry Gao; James Xie; Jonathan Caravass; John Gao; Joseph Fierra; Kristine Lacek; Matthew Schmerer; Mickey Li; Peter Cook; Scott Sammons; Shatavisa Morrison; Tuncika Kendall; Victoria Caba Figueroa; Yan Meng; Yvettie Anuonmhu                                                                                                                                                                                                                                                                                                                                                                                                                                                                                                                                                                                                 |
| EPI_ISL_8928516, EPI_ISL_8928517, EPI_ISL_8928518, EPI_ISL_8928519, EPI_ISL_8928520, EPI_ISL_8928529, EPI_ISL_9227191, EPI_ISL_9227203, EPI_ISL_9227216, EPI_ISL_9227217, EPI_ISL_9227218, EPI_ISL_9227220, EPI_ISL_9227221, EPI_ISL_9227222, EPI_ISL_9227223, EPI_ISL_9227224, EPI_ISL_9227225, EPI_ISL_9227226, EPI_ISL_9227227, EPI_ISL_9227228, EPI_ISL_9227229, EPI_ISL_9227230, EPI_ISL_9227231, EPI_ISL_9227232, EPI_ISL_9227233, EPI_ISL_9227234, EPI_ISL_9227235, EPI_ISL_9227236, EPI_ISL_9227237, EPI_ISL_9227238, EPI_ISL_9227239, EPI_ISL_9227240, EPI_ISL_9227241, EPI_ISL_9227242, EPI_ISL_9227243, EPI_ISL_9227244, EPI_ISL_9227245, EPI_ISL_9227246, EPI_ISL_9227247, EPI_ISL_9227248, EPI_ISL_9227249, EPI_ISL_9227250, EPI_ISL_9227251, EPI_ISL_9227252, EPI_ISL_9227253, EPI_ISL_9227254, EPI_ISL_9227255, EPI_ISL_9227256, EPI_ISL_9227257, EPI_ISL_9227258, EPI_ISL_9227259, EPI_ISL_9227260, EPI_ISL_9227261, EPI_ISL_9227262, EPI_ISL_9227263, EPI_ISL_9227264, EPI_ISL_9227265, EPI_ISL_9227266, EPI_ISL_9227267, EPI_ISL_9227268, EPI_ISL_9227269, EPI_ISL_9227270, EPI_ISL_9227271, EPI_ISL_9227272, EPI_ISL_9227273, EPI_ISL_9227274, EPI_ISL_9227275, EPI_ISL_9227276, EPI_ISL_9227277, EPI_ISL_9227278, EPI_ISL_9227279, EPI_ISL_9227280, EPI_ISL_9227281, EPI_ISL_9227282, EPI_ISL_9227283, EPI_ISL_9227284, EPI_ISL_9227285, EPI_ISL_9227286, EPI_ISL_9227287, EPI_ISL_9227288, EPI_ISL_9227289, EPI_ISL_9227290, EPI_ISL_9227291, EPI_ISL_9227292, EPI_ISL_9227293, EPI_ISL_9227294, EPI_ISL_9227295, EPI_ISL_9227296, EPI_ISL_9227297, EPI_ISL_9227298, EPI_ISL_9227299, EPI_ISL_9227300, EPI_ISL_9227301, EPI_ISL_9227302, EPI_ISL_9227303, EPI_ISL_9227304, EPI_ISL_9227305, EPI_ISL_9227306, EPI_ISL_9227307, EPI_ISL_9227308, EPI_ISL_9227309, EPI_ISL_9227310, EPI_ISL_9227311, EPI_ISL_9227312, EPI_ISL_9227313, EPI_ISL_9227314, EPI_ISL_9227315, EPI_ISL_9227316, EPI_ISL_9227317, EPI_ISL_9227318, EPI_ISL_9227319, EPI_ISL_9227320, EPI_ISL_9227321, EPI_ISL_9227322, EPI_ISL_9227323, EPI_ISL_9227324, EPI_ISL_9227325, EPI_ISL_9227326, EPI_ISL_9227327, EPI_ISL_9227328, EPI_ISL_9227329, EPI_ISL_9227330, EPI_ISL_9227331, EPI_ISL_9227332, EPI_ISL_9227333, EPI_ISL_9227334, EPI_ISL_9227335, EPI_ISL_9227336, EPI_ISL_9227337, EPI_ISL_9227338, EPI_ISL_9227339, EPI_ISL_9227340, EPI_ISL_9227341, EPI_ISL_9227342, EPI_ISL_9227343, EPI_ISL_9227344, EPI_ISL_9227345, EPI_ISL_9227346, EPI_ISL_9227347, EPI_ISL_9227348, EPI_ISL_9227349, EPI_ISL_9227350, EPI_ISL_9227351, EPI_ISL_9227352, EPI_ISL_9227353, EPI_ISL_9227354, EPI_ISL_9227355, EPI_ISL_9227356, EPI_ISL_9227357, EPI_ISL_9227358, EPI_ISL_9227359, EPI_ISL_9227360, EPI_ISL_9227361, EPI_ISL_9227362, EPI_ISL_9227363, EPI_ISL_9227364, EPI_ISL_9227365, EPI_ISL_9227366, EPI_ISL_9227367, EPI_ISL_9227368, EPI_ISL_9227369, EPI_ISL_9227370, EPI_ISL_9227371, EPI_ISL_9227372, EPI_ISL_9227373, EPI_ISL_9227374, EPI_ISL_9227375, EPI_ISL_9227376, EPI_ISL_9227377, EPI_ISL_9227378, EPI_ISL_9227379, EPI_ISL_9227380, EPI_ISL_9227381, EPI_ISL_9227382, EPI_ISL_9227383, EPI_ISL_9227384, EPI_ISL_9227385, EPI_ISL_9227386, EPI_ISL_9227387, EPI_ISL_9227388, EPI_ISL_9227389, EPI_ISL_9227390, EPI_ISL_9227391, EPI_ISL_9227392, EPI_ISL_9227393, EPI_ISL_9227394, EPI_ISL_9227395, EPI_ISL_9227396, EPI_ISL_9227397, EPI_ISL_9227398, EPI_ISL_9227399, EPI_ISL_9227400, EPI_ISL_9227401, EPI_ISL_9227402, EPI_ISL_9227403, EPI_ISL_9227404, EPI_ISL_9227405, EPI_ISL_9227406, EPI_ISL_9227407, EPI_ISL_9227408, EPI_ISL_9227409, EPI_ISL_9227410, EPI_ISL_9227411, EPI_ISL_9227412, EPI_ISL_9227413, EPI_ISL_9227414, EPI_ISL_9227415, EPI_ISL_9227416, EPI_ISL_9227417, EPI_ISL_9227418, EPI_ISL_9227419, EPI_ISL_9227420, EPI_ISL_9227421, EPI_ISL_9227422, EPI_ISL_9227423, EPI_ISL_9227424, EPI_ISL_9227425, EPI_ISL_9227426, EPI_ISL_9227427, EPI_ISL_9227428, EPI_ISL_9227429, EPI_ISL_9227430, EPI_ISL_9227431, EPI_ISL_9227432, EPI_ISL_9227433, EPI_ISL_9227434, EPI_ISL_9227435, EPI_ISL_9227436, EPI_ISL_9227437, EPI_ISL_9227438, EPI_ISL_9227439, EPI_ISL_9227440, EPI_ISL_9227441, EPI_ISL_9227442, EPI_ISL_9227443, EPI_ISL_9227444, EPI_ISL_9227445, EPI_ISL_9227446, EPI_ISL_9227447, EPI_ISL_9227448, EPI_ISL_9227449, EPI_ISL_9227450, EPI_ISL_9227451, EPI_ISL_9227452, EPI_ISL_9227453, EPI_ISL_9227454, EPI_ISL_9227455, EPI_ISL_9227456, EPI_ISL_9227457, EPI_ISL_9227458, EPI_ISL_9227459, EPI_ISL_9227460, EPI_ISL_9227461, EPI_ISL_9227462, EPI_ISL_9227463, EPI_ISL_9227464, EPI_ISL_9227465, EPI_ISL_9227466, EPI_ISL_9227467, EPI_ISL_9227468, EPI_ISL_9227469, EPI_ISL_9227470, EPI_ISL_9227471, EPI_ISL_9227472, EPI_ISL_9227473, EPI_ISL_9227474, EPI_ISL_9227475, EPI_ISL_9227476, EPI_ISL_9227477, EPI_ISL_9227478, EPI_ISL_9227479, EPI_ISL_9227480, EPI_ISL_9227481, EPI_ISL_9227482, EPI_ISL_9227483, EPI_ISL_9227484, EPI_ISL_9227485, EPI_ISL_9227486, EPI_ISL_9227487, EPI_ISL_9227488, EPI_ISL_9227489, EPI_ISL_9227490, EPI_ISL_9227491, EPI_ISL_9227492, EPI_ISL_9227493, EPI_ISL_9227494, EPI_ISL_9227495, EPI_ISL_9227496, EPI_ISL_9227497, EPI_ISL_9227498, EPI_ISL_9227499, EPI_ISL_9227500, EPI_ISL_9227501, EPI_ISL_9227502, EPI_ISL_9227503, EPI_ISL_9227504, EPI_ISL_9227505, EPI_ISL_9227506, EPI_ISL_9227507, EPI_ISL_9227508, EPI_ISL_9227509, EPI_ISL_9227510, EPI_ISL_9227511, EPI_ISL_9227512, EPI_ISL_9227513, EPI_ISL_9227514, EPI_ISL_9227515, EPI_ISL_9227516, EPI_ISL_9227517, EPI_ISL_9227518, EPI_ISL_9227519, EPI_ISL_9227520, EPI_ISL_9227521, EPI_ISL_9227522, EPI_ISL_9227523, EPI_ISL_9227524, EPI_ISL_9227525, EPI_ISL_9227526, EPI_ISL_9227527, EPI_ISL_9227528, EPI_ISL_9227529, EPI_ISL_9227530, EPI_ISL_9227531, EPI_ISL_9227532, EPI_ISL_9227533, EPI_ISL_9227534, EPI_ISL_9227535, EPI_ISL_9227536, EPI_ISL_9227537, EPI_ISL_9227538, EPI_ISL_9227539, EPI_ISL_9227540, EPI_ISL_9227541, EPI_ISL_9227542, EPI_ISL_9227543, EPI_ISL_9227544, EPI_ISL_9227545, EPI_ISL_9227546, EPI_ISL_9227547, EPI_ISL_9227548, EPI_ISL_9227549, EPI_ISL_9227550, EPI_ISL_9227551, EPI_ISL_9227552, EPI_ISL_9227553, EPI_ISL_9227554, EPI_ISL_9227555, EPI_ISL_9227556, EPI_ISL_9227557, EPI_ISL_9227558, EPI_ISL_9227559, EPI_ISL_9227560, EPI_ISL_9227561, EPI_ISL_9227562, EPI_ISL_9227563, EPI_ISL_9227564, EPI_ISL_9227565, EPI_ISL_9227566, EPI_ISL_9227567, EPI_ISL_9227568, EPI_ISL_9227569, EPI_ISL_9227570, EPI_ISL_9227571, EPI_ISL_9227572, EPI_ISL_9227573, EPI_ISL_9227574, EPI_ISL_9227575, EPI_ISL_9227576, EPI_ISL_9227577, EPI_ISL_9227578, EPI_ISL_9227579, EPI_ISL_9227580, EPI_ISL_9227581, EPI_ISL_9227582, EPI_ISL_9227583, EPI_ISL_9227584, EPI_ISL_9227585, EPI_ISL_9227586, EPI_ISL_9227587, EPI_ISL_9227588, EPI_ISL_9227589, EPI_ISL_9227590, EPI_ISL_9227591, EPI_ISL_9227592, EPI_ISL_9227593, EPI_ISL_9227594, EPI_ISL_9227595, EPI_ISL_9227596, EPI_ISL_9227597, EPI_ISL_9227598, EPI_ISL_9227599, EPI_ISL_9227600, EPI_ISL_9227601, EPI_ISL_9227602, EPI_ISL_9227603, EPI_ISL_9227604, EPI_ISL_9227605, EPI_ISL_9227606, EPI_ISL_9227607, EPI_ISL_9227608, EPI_ISL_9227609, EPI_ISL_9227610, EPI_ISL_9227611, EPI_ISL_9227612, EPI_ISL_9227613, EPI_ISL_9227614, EPI_ISL_9227615, EPI_ISL_9227616, EPI_ISL_9227617, EPI_ISL_9227618, EPI_ISL_9227619, EPI_ISL_9227620, EPI_ISL_9227621, EPI_ISL_9227622, EPI_ISL_9227623, EPI_ISL_9227624, EPI_ISL_9227625, EPI_ISL_9227626, EPI_ISL_9227627, EPI_ISL_9227628, EPI_ISL_9227629, EPI_ISL_9227630, EPI_ISL_9227631, EPI_ISL_9227632, EPI_ISL_9227633, EPI_ISL_9227634, EPI_ISL_9227635, EPI_ISL_9227636, EPI_ISL_9227637, EPI_ISL_9227638, EPI_ISL_9227639, EPI_ISL_9227640, EPI_ISL_9227641, EPI_ISL_9227642, EPI_ISL_9227643, EPI_ISL_9227644, EPI_ISL_9227645, EPI_ISL_9227646, EPI_ISL_9227647, EPI_ISL_9227648, EPI_ISL_9227649, EPI_ISL_9227650, EPI_ISL_9227651, EPI_ISL_9227652, EPI_ISL_9227653, EPI_ISL_9227654, EPI_ISL_9227655, EPI_ISL_9227656, EPI_ISL_9227657, EPI_ISL_9227658, EPI_ISL_9227659, EPI_ISL_9227660, EPI_ISL_9227661, EPI_ISL_9227662, EPI_ISL_9227663, EPI_ISL_9227664, EPI_ISL_9227665, EPI_ISL_9227666, EPI_ISL_9227667, EPI_ISL_9227668, EPI_ISL_9227669, EPI_ISL_9227670, EPI_ISL_9227671, EPI_ISL_9227672, EPI_ISL_9227673, EPI_ISL_9227674, EPI_ISL_9227675, EPI_ISL_9227676, EPI_ISL_9227677, EPI_ISL_9227678, EPI_ISL_9227679, EPI_ISL_9227680, EPI_ISL_9227681, EPI_ISL_9227682, EPI_ISL_9227683, EPI_ISL_9227684, EPI_ISL_9227685, EPI_ISL_9227686, EPI_ISL_9227687, EPI_ISL_9227688, EPI_ISL_9227689, EPI_ISL_9227690, EPI_ISL_9227691, EPI_ISL_9227692, EPI_ISL_9227693, EPI_ISL_9227694, EPI_ISL_9227695, EPI_ISL_9227696, EPI_ISL_9227697, EPI_ISL_9227698, EPI_ISL_9227699, EPI_ISL_9227700, EPI_ISL_9227701, EPI_ISL_9227702, EPI_ISL_9227703, EPI_ISL_9227704, EPI_ISL_9227705, EPI_ISL_9227706, EPI_ISL_9227707, EPI_ISL_9227708, EPI_ISL_9227709, EPI_ISL_9227710, EPI_ISL_9227711, EPI_ISL_9227712, EPI_ISL_9227713, EPI_ISL_9227714, EPI_ISL_9227715, EPI_ISL_9227716, EPI_ISL_9227717, EPI_ISL_9227718, EPI_ISL_9227719, EPI_ISL_9227720, EPI_ISL_9227721, EPI_ISL_9227722, EPI_ISL_9227723, EPI_ISL_9227724, EPI_ISL_9227725, EPI_ISL_9227726, EPI_ISL_9227727, EPI_ISL_9227728, EPI_ISL_9227729, EPI_ISL_9227730, EPI_ISL_9227731, EPI_ISL_9227732, EPI_ISL_9227733, EPI_ISL_9227734, EPI_ISL_9227735, EPI_ISL_9227736, EPI_ISL_9227737, EPI_ISL_9227738, EPI_ISL_9227739, EPI_ISL_9227740, EPI_ISL_9227741, EPI_ISL_9227742, EPI_ISL_9227743, EPI_ISL_9227744, EPI_ISL_9227745, EPI_ISL_9227746, EPI_ISL_9227747, EPI_ISL_9227748, EPI_ISL_9227749, EPI_ISL_9227750, EPI_ISL_9227751, EPI_ISL_9227752, EPI_ISL_9227753, EPI_ISL_9227754, EPI_ISL_9227755, EPI_ISL_9227756, EPI_ISL_9227757, EPI_ISL_9227758, EPI_ISL_9227759, EPI_ISL_9227760, EPI_ISL_9227761, EPI_ISL_9227762, EPI_ISL_9227763, EPI_ISL_9227764, EPI_ISL_9227765, EPI_ISL_9227766, EPI_ISL_9227767, EPI_ISL_9227768, EPI_ISL_9227769, EPI_ISL_9227770, EPI_ISL_9227771, EPI_ISL_9227772, EPI_ISL_9227773, EPI_ISL_9227774, EPI_ISL_9227775, EPI_ISL_9227776, EPI_ISL_9227777, EPI_ISL_9227 |                                                                                                                      |                                                                                                                                                                                                                    |                                                                                                                                                                                                                                                                                                                                                                                                                                                                                                                                                                                                                                                                                                                                                                                                                                                                                                                                                                                                |

|                                                                                                                                                                                                                                                                                                                                                                                                                                                                                                                                                                                                                                                                                                                                                                                                                                                                                                                                                                                                                                                                                                                                                                                                                                                                                                                                                                                                                                                                                    |                                                                                                 |                                                                                                                                            |                                                                                                                                                                                                                                                                                                                                  |                                                                                                                                                                                                |
|------------------------------------------------------------------------------------------------------------------------------------------------------------------------------------------------------------------------------------------------------------------------------------------------------------------------------------------------------------------------------------------------------------------------------------------------------------------------------------------------------------------------------------------------------------------------------------------------------------------------------------------------------------------------------------------------------------------------------------------------------------------------------------------------------------------------------------------------------------------------------------------------------------------------------------------------------------------------------------------------------------------------------------------------------------------------------------------------------------------------------------------------------------------------------------------------------------------------------------------------------------------------------------------------------------------------------------------------------------------------------------------------------------------------------------------------------------------------------------|-------------------------------------------------------------------------------------------------|--------------------------------------------------------------------------------------------------------------------------------------------|----------------------------------------------------------------------------------------------------------------------------------------------------------------------------------------------------------------------------------------------------------------------------------------------------------------------------------|------------------------------------------------------------------------------------------------------------------------------------------------------------------------------------------------|
| EPI_ISL_9626331, EPI_ISL_9626332, EPI_ISL_9626333, EPI_ISL_9626334, EPI_ISL_9626335, EPI_ISL_9626336                                                                                                                                                                                                                                                                                                                                                                                                                                                                                                                                                                                                                                                                                                                                                                                                                                                                                                                                                                                                                                                                                                                                                                                                                                                                                                                                                                               | First Medical Laboratory                                                                        | Norwegian Institute of Public Health, Department of Virology                                                                               | Atiya R Ali; Debec Nadia; Engebretsen Serina Beate; Garcia Llorente Ignacio; Hilde Elshaug; Hilde Nordby Falkenhaus; Hilde Vollan; Jon Bråte; Kamilla Heddeland Instefjord; Karoline Bragstad; Kathrine Stene-Johansen; Line Victoria Moen; Marie Paulsen Madsen; Olav Hungenes; Pedersen Benedikte                              |                                                                                                                                                                                                |
| EPI_ISL_8605571                                                                                                                                                                                                                                                                                                                                                                                                                                                                                                                                                                                                                                                                                                                                                                                                                                                                                                                                                                                                                                                                                                                                                                                                                                                                                                                                                                                                                                                                    | GENOME CENTER, Jashore University of Science and Technology                                     | GENOME CENTER, Jashore University of Science and Technology                                                                                | Hassan M. Al-Emran; Iqbal Kabir Jahid; Md. Ali Ahasan Setu; Md. Anwar Hossain; Md. Rasel Parvez; Md. Shaminur Rahman Prosanto Kumar Das; Md. Shazid Hasan; Shovon Lal Sarkar; Toukir Ahammed                                                                                                                                     |                                                                                                                                                                                                |
| EPI_ISL_8605841                                                                                                                                                                                                                                                                                                                                                                                                                                                                                                                                                                                                                                                                                                                                                                                                                                                                                                                                                                                                                                                                                                                                                                                                                                                                                                                                                                                                                                                                    | GENOME CENTER, Jashore University of Science and Technology.                                    | GENOME CENTER, Jashore University of Science and Technology.                                                                               | Hassan M. Al-Emran; Iqbal Kabir Jahid; Md. Ali Ahasan Setu; Md. Anwar Hossain; Md. Rasel Parvez; Md. Shaminur Rahman Prosanto Kumar Das; Md. Shazid Hasan; Shovon Lal Sarkar; Toukir Ahammed                                                                                                                                     |                                                                                                                                                                                                |
| EPI_ISL_8790905, EPI_ISL_8790968, EPI_ISL_8931987                                                                                                                                                                                                                                                                                                                                                                                                                                                                                                                                                                                                                                                                                                                                                                                                                                                                                                                                                                                                                                                                                                                                                                                                                                                                                                                                                                                                                                  | GH A.CHENEVIER-H.MONDOR                                                                         | Department of Virology, Henri Mondor University Hospital, Assistance Publique Hôpitaux de Paris, Université Paris-Est Créteil, INSERM U955 | Alexandre Soulier; Christophe Rodriguez; Elisabeth Trawinski; Guillaume Gricourt; Jean-Michel Pawlotsky; Melissa N'Deби; Slim Fourati; Vanessa Demontant                                                                                                                                                                         |                                                                                                                                                                                                |
| EPI_ISL_9604372                                                                                                                                                                                                                                                                                                                                                                                                                                                                                                                                                                                                                                                                                                                                                                                                                                                                                                                                                                                                                                                                                                                                                                                                                                                                                                                                                                                                                                                                    | GMERS Medical College and Hospital, Sola, Ahmedabad                                             | Gujarat Biotechnology Research Centre                                                                                                      | Akhilesh Modi; Apurvasinh Puvar; Bhadreshsinh Gohil; Chaitanya Joshi; Disha Vora; Janvi Raval; Jaykumar Rangani; Madhvi Joshi; Nimesh Patel; Nitin Savaliya; NitinShukla; Parul Patel; Priyank Chavda; Ramesh Pandit; Roshani Mishra; Sonal Sharma; Tasnim Trivedi; Zarna Patel                                                  |                                                                                                                                                                                                |
| EPI_ISL_8744102, EPI_ISL_8744113, EPI_ISL_8744120, EPI_ISL_8930370, EPI_ISL_8930371, EPI_ISL_8930372, EPI_ISL_8930374, EPI_ISL_9234047, EPI_ISL_9402997                                                                                                                                                                                                                                                                                                                                                                                                                                                                                                                                                                                                                                                                                                                                                                                                                                                                                                                                                                                                                                                                                                                                                                                                                                                                                                                            | see above                                                                                       | GMERS Medical College, Gandhinagar                                                                                                         | Akhilesh Modi; Apurvasinh Puvar; Bhadreshsinh Gohil; Chaitanya Joshi; Disha Vora; Gaurishankar Shrimali; Janvi Raval; Jaykumar Rangani; Madhvi Joshi; Nimesh Patel; Nitin Savaliya; Nitin Shukla; NitinShukla; Priyank Chavda; Ramesh Pandit; Roshani Mishra; Sonal Sharma; Tasnim Trivedi; Zarna Patel                          |                                                                                                                                                                                                |
| EPI_ISL_9610237                                                                                                                                                                                                                                                                                                                                                                                                                                                                                                                                                                                                                                                                                                                                                                                                                                                                                                                                                                                                                                                                                                                                                                                                                                                                                                                                                                                                                                                                    | GMERS Medical College, Gotri, Vadodara                                                          | Gujarat Biotechnology Research Centre                                                                                                      | Akhilesh Modi; Apurvasinh Puvar; Bhadreshsinh Gohil; Bithika; Chaitanya Joshi; Disha Vora; Janvi Raval; Jaykumar Rangani; Madhvi Joshi; Nimesh Patel; Nitin Savaliya; NitinShukla; Priyank Chavda; Ramesh Pandit; Roshani Mishra; Sonal Sharma; Tasnim Trivedi; Zarna Patel                                                      |                                                                                                                                                                                                |
| EPI_ISL_9233981, EPI_ISL_9604313                                                                                                                                                                                                                                                                                                                                                                                                                                                                                                                                                                                                                                                                                                                                                                                                                                                                                                                                                                                                                                                                                                                                                                                                                                                                                                                                                                                                                                                   | GMERS Medical College, Junagadh                                                                 | Gujarat Biotechnology Research Centre                                                                                                      | Akhilesh Modi; Apurvasinh Puvar; Bhadreshsinh Gohil; Chaitanya Joshi; Disha Vora; Janvi Raval; Jaykumar Rangani; Madhvi Joshi; Neeraj Biswas; Nimesh Patel; Nitin Savaliya; NitinShukla; Priyank Chavda; Ramesh Pandit; Roshani Mishra; Sonal Sharma; Tasnim Trivedi; Zarna Patel                                                |                                                                                                                                                                                                |
| EPI_ISL_9234081, EPI_ISL_9402996                                                                                                                                                                                                                                                                                                                                                                                                                                                                                                                                                                                                                                                                                                                                                                                                                                                                                                                                                                                                                                                                                                                                                                                                                                                                                                                                                                                                                                                   | GMERS Medical College, Valsad                                                                   | Gujarat Biotechnology Research Centre                                                                                                      | Akhilesh Modi; Apurvasinh Puvar; Bhadreshsinh Gohil; Chaitanya Joshi; Disha Vora; Janvi Raval; Jaykumar Rangani; Madhvi Joshi; Nimesh Patel; Nitin Savaliya; Nitin Shukla; NitinShukla; Priyank Chavda; Ramesh Pandit; Roshani Mishra; Sonal Sharma; Tasnim Trivedi; Vicky Gandhi; Zarna Patel                                   |                                                                                                                                                                                                |
| EPI_ISL_8889367                                                                                                                                                                                                                                                                                                                                                                                                                                                                                                                                                                                                                                                                                                                                                                                                                                                                                                                                                                                                                                                                                                                                                                                                                                                                                                                                                                                                                                                                    | GSI Laboratorium                                                                                | National Institute of Health Research and Development                                                                                      | Arie Ardiansyah Nugraha; Fajar Nur Sulistyohadi; Hana Apsari Pawestri; Hartanti Dian Ikawati; Kartika Dewi Puspa; Nelly Puspandari; Nur Ika Hariastuti; Putri Widia; Subangkit; Vivi Setiawaty                                                                                                                                   |                                                                                                                                                                                                |
| EPI_ISL_8452465, EPI_ISL_8452466, EPI_ISL_8452467, EPI_ISL_8452471, EPI_ISL_8527502, EPI_ISL_8527503, EPI_ISL_8527504, EPI_ISL_8527505, EPI_ISL_8527506, EPI_ISL_8527507, EPI_ISL_8527509, EPI_ISL_8527510, EPI_ISL_8527511, EPI_ISL_8527512, EPI_ISL_8527514, EPI_ISL_8527515, EPI_ISL_8527516, EPI_ISL_8527518, EPI_ISL_8527519, EPI_ISL_8527526, EPI_ISL_8527527, EPI_ISL_8527530, EPI_ISL_8527531, EPI_ISL_8527536, EPI_ISL_8527537, EPI_ISL_8527542, EPI_ISL_8527543, EPI_ISL_8527544, EPI_ISL_8527545, EPI_ISL_8527546, EPI_ISL_8527548, EPI_ISL_8527549, EPI_ISL_8527552, EPI_ISL_8527554, EPI_ISL_8527555, EPI_ISL_8527556, EPI_ISL_8527557, EPI_ISL_8527559, EPI_ISL_8527560, EPI_ISL_8527563, EPI_ISL_8527564, EPI_ISL_8527565, EPI_ISL_8527568, EPI_ISL_8527570, EPI_ISL_8527571, EPI_ISL_8527572, EPI_ISL_8527576, EPI_ISL_8527577, EPI_ISL_8527582, EPI_ISL_8527579, EPI_ISL_8527580, EPI_ISL_8527581, EPI_ISL_8527582, EPI_ISL_8527583, EPI_ISL_8527585, EPI_ISL_8527586, EPI_ISL_8527589, EPI_ISL_8527591, EPI_ISL_9675042, EPI_ISL_9675043, EPI_ISL_9675045, EPI_ISL_9675046, EPI_ISL_9675047, EPI_ISL_9675048, EPI_ISL_9675050, EPI_ISL_9675051, EPI_ISL_9675052, EPI_ISL_9675055, EPI_ISL_9675056, EPI_ISL_9675057, EPI_ISL_9675058, EPI_ISL_9675059, EPI_ISL_9675061, EPI_ISL_9675062, EPI_ISL_9675066, EPI_ISL_9675067, EPI_ISL_9675068, EPI_ISL_9675069, EPI_ISL_9675070, EPI_ISL_9675071, EPI_ISL_9675072, EPI_ISL_9675073, EPI_ISL_9675074, EPI_ISL_9675075 | see above                                                                                       | Gandhi Medical College and Hospital (GMCH), Secunderabad                                                                                   | NIV Influenza                                                                                                                                                                                                                                                                                                                    | D.R.Manisha Rani; Dr.G.Sushma Rajya Lakshmi; Dr.K.Nagamani; Dr.Sunitha Pakalapaty                                                                                                              |
| EPI_ISL_8830436, EPI_ISL_8830438, EPI_ISL_8830439, EPI_ISL_8830445, EPI_ISL_8830453, EPI_ISL_8830454, EPI_ISL_8830455, EPI_ISL_8830461, EPI_ISL_8830473, EPI_ISL_8830480, EPI_ISL_8830515, EPI_ISL_9679154, EPI_ISL_9679155, EPI_ISL_9679156, EPI_ISL_9679157, EPI_ISL_9679162, EPI_ISL_9679164, EPI_ISL_9679168, EPI_ISL_9679170                                                                                                                                                                                                                                                                                                                                                                                                                                                                                                                                                                                                                                                                                                                                                                                                                                                                                                                                                                                                                                                                                                                                                  | see above                                                                                       | GenePath, Pune                                                                                                                             | RF-IISER Pune                                                                                                                                                                                                                                                                                                                    | Aurnab Ghose; Joy Merwin Monteiro; Krishanpal Karmodiya; Nikhil Phadke; Shatakshi Ranade                                                                                                       |
| EPI_ISL_9697302, EPI_ISL_9697443, EPI_ISL_9697459, EPI_ISL_9697460, EPI_ISL_9697461, EPI_ISL_9697462, EPI_ISL_9697463, EPI_ISL_9697464, EPI_ISL_9697466, EPI_ISL_9697467, EPI_ISL_9697468, EPI_ISL_9697469, EPI_ISL_9697470, EPI_ISL_9697471, EPI_ISL_9697472                                                                                                                                                                                                                                                                                                                                                                                                                                                                                                                                                                                                                                                                                                                                                                                                                                                                                                                                                                                                                                                                                                                                                                                                                      | see above                                                                                       | GenePath                                                                                                                                   | RF-IISER Pune                                                                                                                                                                                                                                                                                                                    | Aurnab Ghose; Joy Merwin Monteiro; Krishanpal Karmodiya; Nikhil Phadke; Shatakshi Ranade                                                                                                       |
| EPI_ISL_9618123                                                                                                                                                                                                                                                                                                                                                                                                                                                                                                                                                                                                                                                                                                                                                                                                                                                                                                                                                                                                                                                                                                                                                                                                                                                                                                                                                                                                                                                                    | General Hospital, Ahwa                                                                          | Gujarat Biotechnology Research Centre                                                                                                      | Akhilesh Modi; Apurvasinh Puvar; Bhadreshsinh Gohil; Chaitanya Joshi; Disha Vora; Hetal Ahir; Janvi Raval; Jaykumar Rangani; Madhvi Joshi; Nimesh Patel; Nitin Savaliya; NitinShukla; Priyank Chavda; Ramesh Pandit; Roshani Mishra; Sonal Sharma; Tasnim Trivedi; Zarna Patel                                                   |                                                                                                                                                                                                |
| EPI_ISL_9604307                                                                                                                                                                                                                                                                                                                                                                                                                                                                                                                                                                                                                                                                                                                                                                                                                                                                                                                                                                                                                                                                                                                                                                                                                                                                                                                                                                                                                                                                    | General Hospital, Mehsana                                                                       | Gujarat Biotechnology Research Centre                                                                                                      | Akhilesh Modi; Apurvasinh Puvar; Bhadreshsinh Gohil; Chaitanya Joshi; Dinesh Vyas; Disha Vora; Janvi Raval; Jaykumar Rangani; Madhvi Joshi; Nimesh Patel; Nitin Savaliya; NitinShukla; Priyank Chavda; Ramesh Pandit; Roshani Mishra; Sonal Sharma; Tasnim Trivedi; Zarna Patel                                                  |                                                                                                                                                                                                |
| EPI_ISL_8885498, EPI_ISL_9023237                                                                                                                                                                                                                                                                                                                                                                                                                                                                                                                                                                                                                                                                                                                                                                                                                                                                                                                                                                                                                                                                                                                                                                                                                                                                                                                                                                                                                                                   | Genexplore Diagnostic center, Ahmedabad                                                         | Gujarat Biotechnology Research Centre                                                                                                      | Akhilesh Modi; Apurvasinh Puvar; Ashish Patel; Bhadreshsinh Gohil; Chaitanya Joshi; Disha Vora; Janvi Raval; Jaykumar Rangani; Madhvi Joshi; Nimesh Patel; Nitin Savaliya; NitinShukla; Priyank Chavda; Ramesh Pandit; Roshani Mishra; Sonal Sharma; Tasnim Trivedi; Zarna Patel                                                 |                                                                                                                                                                                                |
| EPI_ISL_9438697                                                                                                                                                                                                                                                                                                                                                                                                                                                                                                                                                                                                                                                                                                                                                                                                                                                                                                                                                                                                                                                                                                                                                                                                                                                                                                                                                                                                                                                                    | Genome Information Research Center, Research Institute for Microbial Diseases, Osaka University | Genome Information Research Center, Research Institute for Microbial Diseases, Osaka University                                            | Daisuke Motooka; Hiroya Oki; Kentaro Tanaka; and Shota Nakamura                                                                                                                                                                                                                                                                  |                                                                                                                                                                                                |
| EPI_ISL_9779374, EPI_ISL_9779375, EPI_ISL_9779376, EPI_ISL_9779377, EPI_ISL_9779378, EPI_ISL_9779379, EPI_ISL_9779380, EPI_ISL_9779381, EPI_ISL_9779383, EPI_ISL_9779384, EPI_ISL_9779385                                                                                                                                                                                                                                                                                                                                                                                                                                                                                                                                                                                                                                                                                                                                                                                                                                                                                                                                                                                                                                                                                                                                                                                                                                                                                          | see above                                                                                       | Government Fever Hospital                                                                                                                  | Centre for DNA Fingerprinting and Diagnostics                                                                                                                                                                                                                                                                                    | Arunkumar Karunandih; Ashwin Dalal; Asmita Gupta; Divya Vashishta; Murali Bashyam; Nagamani Kammili; Rupin Shelake; Vinay Donipadi                                                             |
| EPI_ISL_8744132, EPI_ISL_9233974, EPI_ISL_9604326, EPI_ISL_9604327, EPI_ISL_9604328                                                                                                                                                                                                                                                                                                                                                                                                                                                                                                                                                                                                                                                                                                                                                                                                                                                                                                                                                                                                                                                                                                                                                                                                                                                                                                                                                                                                | Government Medical College, Bhavnagar                                                           | Gujarat Biotechnology Research Centre                                                                                                      | Akhilesh Modi; Apurvasinh Puvar; Bhadreshsinh Gohil; Chaitanya Joshi; Disha Vora; Janvi Raval; Jaykumar Rangani; Kairavi Desai; Madhvi Joshi; Nimesh Patel; Nitin Savaliya; Nitin Shukla; NitinShukla; Priyank Chavda; Ramesh Pandit; Roshani Mishra; Sonal Sharma; Tasnim Trivedi; Zarna Patel                                  |                                                                                                                                                                                                |
| EPI_ISL_9236175, EPI_ISL_9236188                                                                                                                                                                                                                                                                                                                                                                                                                                                                                                                                                                                                                                                                                                                                                                                                                                                                                                                                                                                                                                                                                                                                                                                                                                                                                                                                                                                                                                                   | Government Medical College, Surat                                                               | Gujarat Biotechnology Research Centre                                                                                                      | Akhilesh Modi; Apurvasinh Puvar; Bhadreshsinh Gohil; Chaitanya Joshi; Disha Vora; Janvi Raval; Jaykumar Rangani; Madhvi Joshi; Netta Khandelwal; Nimesh Patel; Nitin Savaliya; NitinShukla; Priyank Chavda; Ramesh Pandit; Roshani Mishra; Sonal Sharma; Tasnim Trivedi; Zarna Patel                                             |                                                                                                                                                                                                |
| EPI_ISL_9234083                                                                                                                                                                                                                                                                                                                                                                                                                                                                                                                                                                                                                                                                                                                                                                                                                                                                                                                                                                                                                                                                                                                                                                                                                                                                                                                                                                                                                                                                    | Green Cross Genetics Lab Pvt Ltd, Ahmedabad                                                     | Gujarat Biotechnology Research Centre                                                                                                      | Akhilesh Modi; Apurvasinh Puvar; Bhadreshsinh Gohil; Chaitanya Joshi; Disha Vora; Janvi Raval; Jaykumar Rangani; Madhvi Joshi; Nimesh Patel; Nitin Savaliya; NitinShukla; Priyank Chavda; Ramesh Pandit; Roshani Mishra; Sonal Sharma; Tasnim Trivedi; Umang Patel; Zarna Patel                                                  |                                                                                                                                                                                                |
| EPI_ISL_9236227                                                                                                                                                                                                                                                                                                                                                                                                                                                                                                                                                                                                                                                                                                                                                                                                                                                                                                                                                                                                                                                                                                                                                                                                                                                                                                                                                                                                                                                                    | Green Cross Pathology Laboratory, Ahmedabad                                                     | Gujarat Biotechnology Research Centre                                                                                                      | Akhilesh Modi; Apurvasinh Puvar; Bhadreshsinh Gohil; Chaitanya Joshi; Disha Vora; Janvi Raval; Jaykumar Rangani; Madhvi Joshi; Narendra Patel; Nimesh Patel; Nitin Savaliya; NitinShukla; Priyank Chavda; Ramesh Pandit; Roshani Mishra; Sonal Sharma; Tasnim Trivedi; Zarna Patel                                               |                                                                                                                                                                                                |
| EPI_ISL_9236233                                                                                                                                                                                                                                                                                                                                                                                                                                                                                                                                                                                                                                                                                                                                                                                                                                                                                                                                                                                                                                                                                                                                                                                                                                                                                                                                                                                                                                                                    | Gujarat Adani Institute of Medical Sciences, Bhuj                                               | Gujarat Biotechnology Research Centre                                                                                                      | Akhilesh Modi; Apurvasinh Puvar; Bhadreshsinh Gohil; Chaitanya Joshi; Disha Vora; Janvi Raval; Jaykumar Rangani; Madhvi Joshi; Nimesh Patel; Nitin Savaliya; NitinShukla; Priyank Chavda; Ramesh Pandit; Roshani Mishra; Sonal Sharma; Tasnim Trivedi; Zarna Patel; itesh Sudani                                                 |                                                                                                                                                                                                |
| EPI_ISL_9403048, EPI_ISL_9604335                                                                                                                                                                                                                                                                                                                                                                                                                                                                                                                                                                                                                                                                                                                                                                                                                                                                                                                                                                                                                                                                                                                                                                                                                                                                                                                                                                                                                                                   | Gujarat Pathology laboratory & Diagnostic Center, Paldi, Ahmedabad                              | Gujarat Biotechnology Research Centre                                                                                                      | Akhilesh Modi; Apurvasinh Puvar; Bhadreshsinh Gohil; Chaitanya Joshi; Disha Vora; Janvi Raval; Jaykumar Rangani; Madhvi Joshi; Nimesh Patel; Niraj Kotha; Nitin Savaliya; Nitin Shukla; NitinShukla; Priyank Chavda; Ramesh Pandit; Roshani Mishra; Sonal Sharma; Tasnim Trivedi; Zarna Patel                                    |                                                                                                                                                                                                |
| EPI_ISL_9003413                                                                                                                                                                                                                                                                                                                                                                                                                                                                                                                                                                                                                                                                                                                                                                                                                                                                                                                                                                                                                                                                                                                                                                                                                                                                                                                                                                                                                                                                    | H Vila Franca Xira                                                                              | Instituto Nacional de Saude (INSA)                                                                                                         | Borges et al                                                                                                                                                                                                                                                                                                                     |                                                                                                                                                                                                |
| EPI_ISL_9697345, EPI_ISL_9697356, EPI_ISL_9697357, EPI_ISL_9697363, EPI_ISL_9697376, EPI_ISL_9697482, EPI_ISL_9697483, EPI_ISL_9697484, EPI_ISL_9697487, EPI_ISL_9697488, EPI_ISL_9697491, EPI_ISL_9697492, EPI_ISL_9697496, EPI_ISL_9697498, EPI_ISL_9697499, EPI_ISL_9697500, EPI_ISL_9713907, EPI_ISL_9713933                                                                                                                                                                                                                                                                                                                                                                                                                                                                                                                                                                                                                                                                                                                                                                                                                                                                                                                                                                                                                                                                                                                                                                   | see above                                                                                       | HAD - NOBLE HOSPITAL                                                                                                                       | RF-IISER Pune                                                                                                                                                                                                                                                                                                                    | Aurnab Ghose; Joy Merwin Monteiro; Krishanpal Karmodiya                                                                                                                                        |
| EPI_ISL_9170398, EPI_ISL_9170412, EPI_ISL_9170413                                                                                                                                                                                                                                                                                                                                                                                                                                                                                                                                                                                                                                                                                                                                                                                                                                                                                                                                                                                                                                                                                                                                                                                                                                                                                                                                                                                                                                  | Hamamatsu City Institute of Health and Environment                                              | Japan COVID-19 Open Data Consortium                                                                                                        | Atsushi Toyoda; Ayaka Sanae; Hiroshi Mori; Ituro Inoue; Ken Kurokawa; Masanori Arita; Miki Hikida; Natsuko Shijo; Rie Komatsu; Satomi Asano; Shigeki Mitsunaga; Takanori Mushu; Takatomo Fujisawa; Yasuhiro Tanizawa; Yuji Tsuchiya                                                                                              |                                                                                                                                                                                                |
| EPI_ISL_8770701, EPI_ISL_9287725, EPI_ISL_9287731, EPI_ISL_9287732, EPI_ISL_9287733, EPI_ISL_9287734, EPI_ISL_9287736, EPI_ISL_9287737                                                                                                                                                                                                                                                                                                                                                                                                                                                                                                                                                                                                                                                                                                                                                                                                                                                                                                                                                                                                                                                                                                                                                                                                                                                                                                                                             | see above                                                                                       | Hamera Laboratorium                                                                                                                        | National Institute of Health Research and Development                                                                                                                                                                                                                                                                            | Arie Ardiansyah Nugraha; Fajar Nur Sulistyohadi; Hana Apsari Pawestri; Hartanti Dian Ikawati; Kartika Dewi Puspa; Nelly Puspandari; Nur Ika Hariastuti; Putri Widia; Subangkit; Vivi Setiawaty |
| EPI_ISL_8885197                                                                                                                                                                                                                                                                                                                                                                                                                                                                                                                                                                                                                                                                                                                                                                                                                                                                                                                                                                                                                                                                                                                                                                                                                                                                                                                                                                                                                                                                    | Hannover Medical School, Institute of Virology                                                  | Hannover Medical School, Institute of Virology                                                                                             | Lars Steinbrück                                                                                                                                                                                                                                                                                                                  |                                                                                                                                                                                                |
| EPI_ISL_9253408, EPI_ISL_9460794                                                                                                                                                                                                                                                                                                                                                                                                                                                                                                                                                                                                                                                                                                                                                                                                                                                                                                                                                                                                                                                                                                                                                                                                                                                                                                                                                                                                                                                   | Haukeland University Hospital, Dept. of Microbiology                                            | Norwegian Institute of Public Health, Department of Virology                                                                               | Atiya R Ali; Debec Nadia; Engebretsen Serina Beate; Garcia Llorente Ignacio; Hilde Elshaug; Hilde Nordby Falkenhaus; Hilde Vollan; Jon Bråte; Kamilla Heddeland Instefjord; Karoline Bragstad; Kathrine Stene-Johansen; Line Victoria Moen; Marie Paulsen Madsen; Olav Hungenes; Pedersen Benedikte                              |                                                                                                                                                                                                |
| EPI_ISL_8571615, EPI_ISL_8822101, EPI_ISL_8822513                                                                                                                                                                                                                                                                                                                                                                                                                                                                                                                                                                                                                                                                                                                                                                                                                                                                                                                                                                                                                                                                                                                                                                                                                                                                                                                                                                                                                                  | Health Services Laboratories                                                                    | Wellcome Sanger Institute for the COVID-19 Genomics UK (COG-UK) Consortium                                                                 | Cordelia Langford; David K. Jackson; Dominic Kwiatkowski; Ewan Harrison; Health Services Laboratories and Alex Alderton; Ian Johnston; Jeffrey Barrett; John Sillitoe on behalf of the Wellcome Sanger Institute COVID-19 Surveillance Team; Roberto Amato; Sonia Goncalves                                                      |                                                                                                                                                                                                |
| EPI_ISL_9043683                                                                                                                                                                                                                                                                                                                                                                                                                                                                                                                                                                                                                                                                                                                                                                                                                                                                                                                                                                                                                                                                                                                                                                                                                                                                                                                                                                                                                                                                    | Helix                                                                                           | Centers for Disease Control and Prevention Division of Viral Diseases, Pathogen Discovery                                                  | Benjamin Rambo-Martin; Christopher Gulvick; Clinton Paden; Dakota Howard; Dhwanj Batra; Duncan MacCannell; Erisa Sula; Helix CA; Jason Caravas; Kristine Lacek; Matthew Schmeer; Peter Cook; Scott Sammons; Shatavia Morrison; Tymeckia Kendall; Victoria Caban Figueroa; Yvette Uniarumhi                                       |                                                                                                                                                                                                |
| EPI_ISL_8515359, EPI_ISL_8515360, EPI_ISL_8515361, EPI_ISL_8515362, EPI_ISL_8515368, EPI_ISL_8515369, EPI_ISL_8515370, EPI_ISL_8515371                                                                                                                                                                                                                                                                                                                                                                                                                                                                                                                                                                                                                                                                                                                                                                                                                                                                                                                                                                                                                                                                                                                                                                                                                                                                                                                                             | see above                                                                                       | Home Quarantine Taskforce                                                                                                                  | Hong Kong Department of Health                                                                                                                                                                                                                                                                                                   | Alan K.L. Tsang; Edman T.K. Lam; Ken H.L. Ng; Patricia K. L. Leung; Peter C.W. Yip; Rickjason C.W. Chan                                                                                        |
| EPI_ISL_9388817                                                                                                                                                                                                                                                                                                                                                                                                                                                                                                                                                                                                                                                                                                                                                                                                                                                                                                                                                                                                                                                                                                                                                                                                                                                                                                                                                                                                                                                                    | Hopital                                                                                         | National Reference Center for Viruses of Respiratory Infections, Institut Pasteur, Paris                                                   | Angela Brisebarre; Camille Capel; Christophe Malabat; Corinne Maufrays; Etienne Simon-Loriere; Frédéric Lemoine; Julien Fumey; Louise Lefrançois; Marine DESROCHES; Marion Barbet; Maud Vanpeene; Méline Bizard; Slim El Khari; Sylvie Behillil; Sylvie Van der Werf; Vincent Enouf                                              |                                                                                                                                                                                                |
| EPI_ISL_8792338                                                                                                                                                                                                                                                                                                                                                                                                                                                                                                                                                                                                                                                                                                                                                                                                                                                                                                                                                                                                                                                                                                                                                                                                                                                                                                                                                                                                                                                                    | Hospital Center Luxembourg                                                                      | Laboratoire national de sante, Microbiology, Microbial Genomics Platform                                                                   | Anke Wienecke-Baldacchino; Catherine Ragimbeau; Elodie Solarino; Fatu Djabi; Jean-Hugues Francois; Jessica Tapp; Lise Pignon; Michel Kohnen; Raoul Salmon; Tamir Abdelrahman; Virginie Jover; sibel Berger                                                                                                                       |                                                                                                                                                                                                |
| EPI_ISL_9201014, EPI_ISL_9201019, EPI_ISL_9203835                                                                                                                                                                                                                                                                                                                                                                                                                                                                                                                                                                                                                                                                                                                                                                                                                                                                                                                                                                                                                                                                                                                                                                                                                                                                                                                                                                                                                                  | Houston Methodist Hospital                                                                      | Houston Methodist Hospital                                                                                                                 | Akanksha Batajoo; Ilya J. Finkelstein; James J. Davis; Jessica Cambric; Jimmy Gollihar; Kristina Reppond; Madison N. Snyer; Marcus Nguyen; Matthew Ojeda Saavedra; Paul A. Christensen; Randall J. Olsen; Rashi Thakur; Regan Mangham; Richard Snehall; Robert Olson; Ryan Gadd; S. Wesley Long; Sindy Pena; and James M. Musser |                                                                                                                                                                                                |



|                                                                                                                                                                                                                                                                                                                                                                                                                                                                                                                                                                                                                                                                                                                         |                                                                                                 |                                                                                                                                                                                         |                                                                                                                                                                                                                                                                                                                                                                                                                                                                                                                                                                                                     |                                                                                                                                                                                                                                                                  |
|-------------------------------------------------------------------------------------------------------------------------------------------------------------------------------------------------------------------------------------------------------------------------------------------------------------------------------------------------------------------------------------------------------------------------------------------------------------------------------------------------------------------------------------------------------------------------------------------------------------------------------------------------------------------------------------------------------------------------|-------------------------------------------------------------------------------------------------|-----------------------------------------------------------------------------------------------------------------------------------------------------------------------------------------|-----------------------------------------------------------------------------------------------------------------------------------------------------------------------------------------------------------------------------------------------------------------------------------------------------------------------------------------------------------------------------------------------------------------------------------------------------------------------------------------------------------------------------------------------------------------------------------------------------|------------------------------------------------------------------------------------------------------------------------------------------------------------------------------------------------------------------------------------------------------------------|
| EPI_ISL_9514217                                                                                                                                                                                                                                                                                                                                                                                                                                                                                                                                                                                                                                                                                                         | Institute of Microbiology and Immunology, Faculty of Medicine, University of Ljubljana          | Institute of Microbiology and Immunology, Faculty of Medicine, University of Ljubljana                                                                                                  | Alen Suljić; Andraž Celar; Domen Lazar; Doroteja Vljaj; Mario Poljak; Miša Korva; Patricija Pozvek; Samo Zakotnik; Tatjana Avšič - Županec; Tina Gabrovšek; Tina Živič; Tomaž Mark Zorec; Špela Pleh                                                                                                                                                                                                                                                                                                                                                                                                |                                                                                                                                                                                                                                                                  |
| EPI_ISL_9779390, EPI_ISL_9779391, EPI_ISL_9779393, EPI_ISL_9779394, EPI_ISL_9779395, EPI_ISL_9779396, EPI_ISL_9779397                                                                                                                                                                                                                                                                                                                                                                                                                                                                                                                                                                                                   | see above                                                                                       | Institute of Preventive Medicine                                                                                                                                                        | Centre for DNA Fingerprinting and Diagnostics                                                                                                                                                                                                                                                                                                                                                                                                                                                                                                                                                       | Arunkumar Karunanidhi; Ashwin Dalal; Asmita Gupta; Divya Vashishta; Murali Bashyam; Nagamani Kammili; Rupin Shelake; Vinay Donipadi                                                                                                                              |
| EPI_ISL_8922588                                                                                                                                                                                                                                                                                                                                                                                                                                                                                                                                                                                                                                                                                                         | Institute of Virology, Biomedical Research Center of the Slovak Academy of Sciences, Bratislava | Faculty of Mathematics, Physics and Informatics, Comenius University, Bratislava                                                                                                        | Boris Klempa; Brona Brejova; Jozef Nosek; Juraj Kopacek; Kristina Borsova; Lubomira Lukacikova; Martina Licikova; Martina Nebahacova; Monika Slavikova; Sabina Fumacova Havlikova; Tomas Vinar; Veronika Vanova; Viktoria Cabanova                                                                                                                                                                                                                                                                                                                                                                  |                                                                                                                                                                                                                                                                  |
| EPI_ISL_8659164, EPI_ISL_8775202, EPI_ISL_8864285, EPI_ISL_8864295                                                                                                                                                                                                                                                                                                                                                                                                                                                                                                                                                                                                                                                      | Integrated Covid Hub North East                                                                 | Wellcome Sanger Institute for the COVID-19 Genomics UK (COG-UK) Consortium                                                                                                              | Cordelia Langford; David K. Jackson; Dominic Kwiatkowski; Ewan Harrison; Ian Johnston; Integrated Covid Hub North East and Alex Alderton; Jeffrey Barrett; John Sillitoe on behalf of the Wellcome Sanger Institute COVID-19 Surveillance Team; Roberto Amato; Sonia Goncalves                                                                                                                                                                                                                                                                                                                      |                                                                                                                                                                                                                                                                  |
| EPI_ISL_9456604, EPI_ISL_9456606                                                                                                                                                                                                                                                                                                                                                                                                                                                                                                                                                                                                                                                                                        | International Centre for Diarrhoeal Disease Reseach, Bangladesh (icddr.b)                       | icddr.b/iEDCR-ideSHI Genomics Lab                                                                                                                                                       | Afrad MH; Bhuyian TR; Firdausi Qadri; Hamza O; Islam T; Khanam F; Manjur Hossain Khan; Mohabbat Hossian; Tahmina Shirin                                                                                                                                                                                                                                                                                                                                                                                                                                                                             |                                                                                                                                                                                                                                                                  |
| EPI_ISL_8878803                                                                                                                                                                                                                                                                                                                                                                                                                                                                                                                                                                                                                                                                                                         | JSC Megalab                                                                                     | Department for Virology, Molecular Biology and Genome Research, R. G. Lugar Center for Public Health Research, National Center for Disease Control and Public Health (NCDC) of Georgia. | Adam Kotorashvili; Amiran Gamkrelidze; Ana Papkiauri; Ann Machablishvili; Anna Kasradze; Davit Tsaquria; Ekaterine Khmaladze; Ekaterine Zangaladze; Ekaterine Zhghenti; Giorgi Gogoladze; Giorgi Tomashvili; Gvantsa Brachveli; Gvantsa Chanturia; Irma Burjanadze; Ketevan Sidamonidze; Khatuna Zakhshvili; Lela Sabadze; Lela Urushadze; Magda Dgebuadze; Maia Alkhashvili; Mari Gavashelidze; Mariam Zakalashvili; Marine Murtskhalvadze; Meri Pantsulaia; Nato Kotaria; Nino Berishvili; Paata Imnadze; Roena Sukhiashvili; Salome Javashvili; Tamar Jashishvili; Tata Imnadze; Tea Teyvdoradze |                                                                                                                                                                                                                                                                  |
| EPI_ISL_9092511                                                                                                                                                                                                                                                                                                                                                                                                                                                                                                                                                                                                                                                                                                         | Jayadeva Institute of Cardiac Sciences, Bengaluru                                               | National Center for Biological Sciences, TIFR - Rockefeller Foundation                                                                                                                  | Awadhesh Pandit; Bhagyashree Madhav Shelar; Darshan Sreenivas; Dimple Notani; Kathirvel Kandasamy; Lakshminarayanan CP; Satyajit Mayor; Uma Ramakrishnan                                                                                                                                                                                                                                                                                                                                                                                                                                            |                                                                                                                                                                                                                                                                  |
| EPI_ISL_9306278                                                                                                                                                                                                                                                                                                                                                                                                                                                                                                                                                                                                                                                                                                         | Jerusalem Central Laboratories                                                                  | Israeal Central Virology laboratory                                                                                                                                                     | Danit Sofer; Efrat Dahan Bucris; Ella Mendelson; Evan Nachum; Hagar Morad; Julia Vainer; Maya Davidovich; Michal Mandelboim; Michal Zak; Miranda Geva; Neta Zuckerman; Or Zilbertzan; Oran Erster; Orna Mor; Rona Grossman                                                                                                                                                                                                                                                                                                                                                                          |                                                                                                                                                                                                                                                                  |
| EPI_ISL_8455623, EPI_ISL_8717063                                                                                                                                                                                                                                                                                                                                                                                                                                                                                                                                                                                                                                                                                        | Jessa                                                                                           | Jessa                                                                                                                                                                                   | Severine Berden et al. on behalf of the Jessa_crdLab                                                                                                                                                                                                                                                                                                                                                                                                                                                                                                                                                |                                                                                                                                                                                                                                                                  |
| EPI_ISL_8818457                                                                                                                                                                                                                                                                                                                                                                                                                                                                                                                                                                                                                                                                                                         | Johns Hopkins Hospital Department of Pathology                                                  | Johns Hopkins Hospital Department of Pathology                                                                                                                                          | Amary Fall; C. Paul Morris; David Gaston; Heba H. Mostafa; Julie M. Norton; Matthew Schwartz; Michael Forman; Raghdha Eldesouki                                                                                                                                                                                                                                                                                                                                                                                                                                                                     |                                                                                                                                                                                                                                                                  |
| EPI_ISL_9697377, EPI_ISL_9697473, EPI_ISL_9697475, EPI_ISL_9697476, EPI_ISL_9697478, EPI_ISL_9697479, EPI_ISL_9713906                                                                                                                                                                                                                                                                                                                                                                                                                                                                                                                                                                                                   | see above                                                                                       | KEM                                                                                                                                                                                     | RF-IISER Pune                                                                                                                                                                                                                                                                                                                                                                                                                                                                                                                                                                                       | Aurnab Ghose; Joy Merwin Monteiro; Krishanpal Karmodiya                                                                                                                                                                                                          |
| EPI_ISL_9401693, EPI_ISL_9401694, EPI_ISL_9401696, EPI_ISL_9401707, EPI_ISL_9401714, EPI_ISL_9402066, EPI_ISL_9402088                                                                                                                                                                                                                                                                                                                                                                                                                                                                                                                                                                                                   | see above                                                                                       | KIMBERLEY LABORATORY                                                                                                                                                                    | National Institute for Communicable Diseases of the National Health Laboratory Service                                                                                                                                                                                                                                                                                                                                                                                                                                                                                                              | Amoako DG; Bhiman JN; Everatt J; Ismail A; Kekana D; Mahlangu B; Mnguni A; Mohale T; Ntuli N; Scheepers C; Wolter N                                                                                                                                              |
| EPI_ISL_8801461, EPI_ISL_8801462, EPI_ISL_8801463, EPI_ISL_8801464, EPI_ISL_8801465, EPI_ISL_8801466, EPI_ISL_8801467, EPI_ISL_8808259, EPI_ISL_8808262, EPI_ISL_9287786, EPI_ISL_9287787, EPI_ISL_9287788, EPI_ISL_9287789                                                                                                                                                                                                                                                                                                                                                                                                                                                                                             | see above                                                                                       | KKP Kelas 1 Soekarno-Hatta (FarmaLab)                                                                                                                                                   | National Institute of Health Research and Development                                                                                                                                                                                                                                                                                                                                                                                                                                                                                                                                               | Arie Ardiansyah Nugraha; Fajar Nur Sulistiyohadi; Hana Aparsi Pawestri; Hartanti Dian Ikwati; Kartika Dewi Puspa; Nelly Puspandari; Nur Ika Hariastuti; Putri Widia; Subangkit; Vivi Setiawaty                                                                   |
| EPI_ISL_8801460, EPI_ISL_9571334, EPI_ISL_9571335                                                                                                                                                                                                                                                                                                                                                                                                                                                                                                                                                                                                                                                                       | KKP Kelas 1 Soekarno-Hatta (iLab)                                                               | National Institute of Health Research and Development                                                                                                                                   | Arie Ardiansyah Nugraha; Fajar Nur Sulistiyohadi; Hana Aparsi Pawestri; Hartanti Dian Ikwati; Kartika Dewi Puspa; Nelly Puspandari; Nur Ika Hariastuti; Puri Widia; Putri Widia; Subangkit; Vivi Setiawaty                                                                                                                                                                                                                                                                                                                                                                                          |                                                                                                                                                                                                                                                                  |
| EPI_ISL_9218155                                                                                                                                                                                                                                                                                                                                                                                                                                                                                                                                                                                                                                                                                                         | Kagawa Prefectural Research Institute for Environmental Sciences and Public Health              | Kagawa Prefectural Research Institute for Environmental Sciences and Public Health                                                                                                      | Kenji Kuwahara; Kentaro Itokawa; Makoto Kuroda; Masanori Hashino; Mayumi Arizuka; Rina Tanaka; Tsuyoshi Sekizuka; Yukari Terajima                                                                                                                                                                                                                                                                                                                                                                                                                                                                   |                                                                                                                                                                                                                                                                  |
| EPI_ISL_9097281, EPI_ISL_9535567, EPI_ISL_957759                                                                                                                                                                                                                                                                                                                                                                                                                                                                                                                                                                                                                                                                        | Kaiser Permanente Southern California                                                           | Helix                                                                                                                                                                                   | Helix; Kaiser Permanente Southern California                                                                                                                                                                                                                                                                                                                                                                                                                                                                                                                                                        |                                                                                                                                                                                                                                                                  |
| EPI_ISL_9026242                                                                                                                                                                                                                                                                                                                                                                                                                                                                                                                                                                                                                                                                                                         | Kantonsspital Aarau                                                                             | Institute of Medical Virology, University of Zurich                                                                                                                                     | Alexandra Trkola; Annette Audigé; Catharine Aquino; Cyril Shah; Daniel Ehrsam; Gabriela Ziltener; Guido Bloemberg; Hubert Rehrauer; Isabel Stürmer; Joel Wirz; Jon Huder; Jürg Böni; Kevin Steiner; Maria Grünberg; Maryam Zaheer; Michael Huber; Riccarda Capaul; Stefan Schmutz; Verena Kufner; Weihong Qi                                                                                                                                                                                                                                                                                        |                                                                                                                                                                                                                                                                  |
| EPI_ISL_9287819, EPI_ISL_9287820, EPI_ISL_9287821, EPI_ISL_9287822, EPI_ISL_9287823, EPI_ISL_9287824, EPI_ISL_9287825, EPI_ISL_9287826, EPI_ISL_9287827, EPI_ISL_9287828, EPI_ISL_9287829                                                                                                                                                                                                                                                                                                                                                                                                                                                                                                                               | see above                                                                                       | Kantor Kesehatan Pelabuhan Kelas II Balikpapan                                                                                                                                          | National Institute of Health Research and Development                                                                                                                                                                                                                                                                                                                                                                                                                                                                                                                                               | Arie Ardiansyah Nugraha; Fajar Nur Sulistiyohadi; Hana Aparsi Pawestri; Hartanti Dian Ikwati; Kartika Dewi Puspa; Nelly Puspandari; Nur Ika Hariastuti; Puri Widia; Subangkit; Vivi Setiawaty                                                                    |
| EPI_ISL_8788703, EPI_ISL_8788728, EPI_ISL_8896738, EPI_ISL_8896779, EPI_ISL_8896791, EPI_ISL_8896796, EPI_ISL_8896810, EPI_ISL_8896824, EPI_ISL_8896872, EPI_ISL_8896896, EPI_ISL_8897848, EPI_ISL_8897849, EPI_ISL_8897898, EPI_ISL_8897900, EPI_ISL_8897912, EPI_ISL_8897958, EPI_ISL_8897975                                                                                                                                                                                                                                                                                                                                                                                                                         | see above                                                                                       | Karolinska University Hospital Huddinge                                                                                                                                                 | Karolinska University Hospital                                                                                                                                                                                                                                                                                                                                                                                                                                                                                                                                                                      | Annika Tiveljung Lindell; Henning Onsrbring; Jan Albert; Karina Hentrich; Lynda Eneh; Maria Ropat; Martin Ekman; Natalija Gerasimic; Robert Dyrdak; Sandra Brodesson; Shambhu Ganeshappa Aralaguppe; Tanja Normark; Tobias Allander; Valterri Wirta; Zhibing Yun |
| EPI_ISL_8788504, EPI_ISL_8788509, EPI_ISL_8896368, EPI_ISL_8896392, EPI_ISL_8896419, EPI_ISL_8896433, EPI_ISL_8896455, EPI_ISL_8896600, EPI_ISL_8896684, EPI_ISL_8896689, EPI_ISL_8897005, EPI_ISL_8897017, EPI_ISL_8897054, EPI_ISL_8897065, EPI_ISL_8897997, EPI_ISL_8898001, EPI_ISL_8898082, EPI_ISL_8898120, EPI_ISL_8898123                                                                                                                                                                                                                                                                                                                                                                                       | see above                                                                                       | Karolinska University Hospital Solna                                                                                                                                                    | Karolinska University Hospital                                                                                                                                                                                                                                                                                                                                                                                                                                                                                                                                                                      | Annika Tiveljung Lindell; Henning Onsrbring; Jan Albert; Karina Hentrich; Lynda Eneh; Maria Ropat; Martin Ekman; Natalija Gerasimic; Robert Dyrdak; Sandra Brodesson; Shambhu Ganeshappa Aralaguppe; Tanja Normark; Tobias Allander; Valterri Wirta; Zhibing Yun |
| EPI_ISL_9512074, EPI_ISL_9512081, EPI_ISL_9512082, EPI_ISL_9512083, EPI_ISL_9512084, EPI_ISL_9512085, EPI_ISL_9512086, EPI_ISL_9512087, EPI_ISL_9512088, EPI_ISL_9512089, EPI_ISL_9512091, EPI_ISL_9512095, EPI_ISL_9512099, EPI_ISL_9512100, EPI_ISL_9512103, EPI_ISL_9512104, EPI_ISL_9512106, EPI_ISL_9512107, EPI_ISL_9512109, EPI_ISL_9512112, EPI_ISL_9512116, EPI_ISL_9512127, EPI_ISL_9512128, EPI_ISL_9512155, EPI_ISL_9512191, EPI_ISL_9512196, EPI_ISL_9512203, EPI_ISL_9512215, EPI_ISL_9512234, EPI_ISL_9512238, EPI_ISL_9512248, EPI_ISL_9512256, EPI_ISL_9512260, EPI_ISL_9512268, EPI_ISL_9512271, EPI_ISL_9512315, EPI_ISL_9512342, EPI_ISL_9512349, EPI_ISL_9512356, EPI_ISL_9512374, EPI_ISL_9512377 | see above                                                                                       | Kasturba Hospital Molecular Lab - INSACOG                                                                                                                                               | Kasturba hospital WGS                                                                                                                                                                                                                                                                                                                                                                                                                                                                                                                                                                               | Jayanthi Shastri; Vidushi Chitalia                                                                                                                                                                                                                               |
| EPI_ISL_9244313, EPI_ISL_9244314, EPI_ISL_9244317, EPI_ISL_9244318, EPI_ISL_9244319, EPI_ISL_9244455                                                                                                                                                                                                                                                                                                                                                                                                                                                                                                                                                                                                                    | King George's Medical University                                                                | CSIR-National Botanical Research Institute                                                                                                                                              | Amita Jain; Babita; Priti Prasad; Samir V Sawant; Shantanu Prakash; Sumit K Bag; Suruchi Shukla; Tripti Rungta                                                                                                                                                                                                                                                                                                                                                                                                                                                                                      |                                                                                                                                                                                                                                                                  |
| EPI_ISL_9095486                                                                                                                                                                                                                                                                                                                                                                                                                                                                                                                                                                                                                                                                                                         | Klang Hospital                                                                                  | Division of Genomic Medicine and Innovation support, Department of Medical Sciences, Ministry of Public Health, Thailand                                                                | Archawin Rojanawiwat; Jirapha Pakdee; Natthakul Bunnenge; Nuanjun Wichukhinda; Pempitcha Thawong; Pilailuk Akkapaiboon Okada; Pundharika Piboonsiri; Surakameth Mahasirmongkol; Waritta Sawaengdee                                                                                                                                                                                                                                                                                                                                                                                                  |                                                                                                                                                                                                                                                                  |
| EPI_ISL_9384693                                                                                                                                                                                                                                                                                                                                                                                                                                                                                                                                                                                                                                                                                                         | Klinika za infektivne bolesti "Dr. Fran Mihaljević"                                             | Hrvatski zavod za javno zdravstvo                                                                                                                                                       | Anita Jurić; Dragan Jurić; Irena Tabain; Ivana Ferenčak; Josipa Kuzle                                                                                                                                                                                                                                                                                                                                                                                                                                                                                                                               |                                                                                                                                                                                                                                                                  |
| EPI_ISL_8681467, EPI_ISL_8683399, EPI_ISL_8683453, EPI_ISL_8683473, EPI_ISL_9057813, EPI_ISL_9057892                                                                                                                                                                                                                                                                                                                                                                                                                                                                                                                                                                                                                    | Klinikum Ernst von Bergmann gemeinnützige GmbH - stationärer Bereich                            | Robert Koch Institute                                                                                                                                                                   |                                                                                                                                                                                                                                                                                                                                                                                                                                                                                                                                                                                                     |                                                                                                                                                                                                                                                                  |
| EPI_ISL_9446244                                                                                                                                                                                                                                                                                                                                                                                                                                                                                                                                                                                                                                                                                                         | Klinikum Stuttgart                                                                              | Robert Koch Institute                                                                                                                                                                   |                                                                                                                                                                                                                                                                                                                                                                                                                                                                                                                                                                                                     |                                                                                                                                                                                                                                                                  |
| EPI_ISL_8925616                                                                                                                                                                                                                                                                                                                                                                                                                                                                                                                                                                                                                                                                                                         | Klinisch Laboratorium ZNA                                                                       | Klinisch Laboratorium ZNA                                                                                                                                                               | Verstrepen et al.                                                                                                                                                                                                                                                                                                                                                                                                                                                                                                                                                                                   |                                                                                                                                                                                                                                                                  |
| EPI_ISL_9095283, EPI_ISL_9095300, EPI_ISL_9216842, EPI_ISL_9217105                                                                                                                                                                                                                                                                                                                                                                                                                                                                                                                                                                                                                                                      | Kuala Lumpur International Airport (KLIA) Health Office                                         | Institute for Medical Research, Infectious Diseases Research Centre, National Institutes of Health, Ministry of Health Malaysia                                                         | Ahmad FA; Ahmad Fazilah NA; Anasir MI; Azizan MA; Kamel K; Mohamad Sukri MZ; Norhisham SN; Ramly N; Robert F; Rosli NR; Suppiah J; Thayan R                                                                                                                                                                                                                                                                                                                                                                                                                                                         |                                                                                                                                                                                                                                                                  |
| EPI_ISL_9596155, EPI_ISL_9596156                                                                                                                                                                                                                                                                                                                                                                                                                                                                                                                                                                                                                                                                                        | Kushtia Medical College, Kushtia                                                                | IEDCR-icddr.b                                                                                                                                                                           | ASM Alamgir; Ahmed Nawsher Alam; Awiad Hossain; Dinesh Mondal; Firdausi Qadri; Hassan Afrad; Mahbubur Rahman; Manjur Hossain Khan; Md. Mahfuzur Rahman; Mohammad Enayet Hossain; Mohammad Jubair; Mohammad Shahidul Islam; Mohammed Ziaur Rahman; Mojnu Miah; Mustafizur Rahman; Rasheedul Hasan; Razib Mazumder; Saiful Alam Shanto; Samir Kumar Saha; Senjuti Saha; Sharmina Afrab; Syed Muktabir Al Sium; Tahmina Shirin                                                                                                                                                                         |                                                                                                                                                                                                                                                                  |
| EPI_ISL_9320433                                                                                                                                                                                                                                                                                                                                                                                                                                                                                                                                                                                                                                                                                                         | LABOFFICE                                                                                       | CNR Virus des Infections Respiratoires - France SUD                                                                                                                                     | Antonin Bal; Bruno Lina; Bruno Simon; Gregory Destras; Gwendolyne Burfin; Hadrien Regue; Laurence Josset; Martine Valette; Quentin Semanas; Théophile Boyer                                                                                                                                                                                                                                                                                                                                                                                                                                         |                                                                                                                                                                                                                                                                  |
| EPI_ISL_9597669                                                                                                                                                                                                                                                                                                                                                                                                                                                                                                                                                                                                                                                                                                         | LABORATOIRE NOVELAB                                                                             | CNR Virus des Infections Respiratoires - France SUD                                                                                                                                     | Antonin Bal; Bruno Lina; Bruno Simon; Gregory Destras; Gwendolyne Burfin; Hadrien Regue; Laurence Josset; Martine Valette; Quentin Semanas; Théophile Boyer                                                                                                                                                                                                                                                                                                                                                                                                                                         |                                                                                                                                                                                                                                                                  |
| EPI_ISL_8678523, EPI_ISL_8678556, EPI_ISL_9107122, EPI_ISL_9107294, EPI_ISL_9107414, EPI_ISL_9210159, EPI_ISL_9210243                                                                                                                                                                                                                                                                                                                                                                                                                                                                                                                                                                                                   | see above                                                                                       | LADR Zentrallabor DR. Kramer & Kollegen Geesthacht                                                                                                                                      | Robert Koch Institute                                                                                                                                                                                                                                                                                                                                                                                                                                                                                                                                                                               |                                                                                                                                                                                                                                                                  |
| EPI_ISL_9321566                                                                                                                                                                                                                                                                                                                                                                                                                                                                                                                                                                                                                                                                                                         | LAM BIO 86 SITE DE CHAUMONT                                                                     | CNR Virus des Infections Respiratoires -                                                                                                                                                | Antonin Bal; Bruno Lina; Bruno Simon; Gregory Destras; Gwendolyne Burfin; Hadrien Regue; Laurence Josset; Martine Valette; Quentin Semanas; Théophile Boyer                                                                                                                                                                                                                                                                                                                                                                                                                                         |                                                                                                                                                                                                                                                                  |

|                                                                                                                                                                                                                                                                                                                                                                                                                                         |                                                                |                                                                                                                                                                                                                                   |                                                                                                                                                                                                                                                                                                                                                                                                                                                                                                                                                                                                                                                                                                                                                                                                                                                                                                                                                                                                                                                                                   |
|-----------------------------------------------------------------------------------------------------------------------------------------------------------------------------------------------------------------------------------------------------------------------------------------------------------------------------------------------------------------------------------------------------------------------------------------|----------------------------------------------------------------|-----------------------------------------------------------------------------------------------------------------------------------------------------------------------------------------------------------------------------------|-----------------------------------------------------------------------------------------------------------------------------------------------------------------------------------------------------------------------------------------------------------------------------------------------------------------------------------------------------------------------------------------------------------------------------------------------------------------------------------------------------------------------------------------------------------------------------------------------------------------------------------------------------------------------------------------------------------------------------------------------------------------------------------------------------------------------------------------------------------------------------------------------------------------------------------------------------------------------------------------------------------------------------------------------------------------------------------|
| EPI_ISL_8812423,<br>EPI_ISL_9320821,<br>EPI_ISL_9426251                                                                                                                                                                                                                                                                                                                                                                                 | LAM BIOPOLE ORTHEZ                                             | France SUD<br>CNR Virus des Infections Respiratoires -<br>France SUD                                                                                                                                                              | Antonin Bal; Bruno Lina; Bruno Simon; Gregory Destras; Gwendolyne Burfin; Hadrien Regue; Laurence Josset; Martine Valette; Quentin Semanas; Théophile Boyer                                                                                                                                                                                                                                                                                                                                                                                                                                                                                                                                                                                                                                                                                                                                                                                                                                                                                                                       |
| EPI_ISL_9598845                                                                                                                                                                                                                                                                                                                                                                                                                         | LAM NOVELAB LVA                                                | CNR Virus des Infections Respiratoires -<br>France SUD                                                                                                                                                                            | Antonin Bal; Bruno Lina; Bruno Simon; Gregory Destras; Gwendolyne Burfin; Hadrien Regue; Laurence Josset; Martine Valette; Quentin Semanas; Theophile Boyer                                                                                                                                                                                                                                                                                                                                                                                                                                                                                                                                                                                                                                                                                                                                                                                                                                                                                                                       |
| EPI_ISL_9201581,<br>EPI_ISL_9201604                                                                                                                                                                                                                                                                                                                                                                                                     | LANCET                                                         | National Institute for Communicable<br>Diseases of the National Health<br>Laboratory Service                                                                                                                                      | Amoako DG; Bhiman JN; Everatt J; Ismail A; Kekana D; Mahlangu B; Mnguni A; Mohale T; Ntuli N; Scheepers C; Wolter N                                                                                                                                                                                                                                                                                                                                                                                                                                                                                                                                                                                                                                                                                                                                                                                                                                                                                                                                                               |
| EPI_ISL_9320734                                                                                                                                                                                                                                                                                                                                                                                                                         | LBM BIOPOLE IDRON                                              | CNR Virus des Infections Respiratoires -<br>France SUD                                                                                                                                                                            | Antonin Bal; Bruno Lina; Bruno Simon; Gregory Destras; Gwendolyne Burfin; Hadrien Regue; Laurence Josset; Martine Valette; Quentin Semanas; Théophile Boyer                                                                                                                                                                                                                                                                                                                                                                                                                                                                                                                                                                                                                                                                                                                                                                                                                                                                                                                       |
| EPI_ISL_9319444                                                                                                                                                                                                                                                                                                                                                                                                                         | LBM CHARENTE-MARITIME NORD                                     | CNR Virus des Infections Respiratoires -<br>France SUD                                                                                                                                                                            | Antonin Bal; Bruno Lina; Bruno Simon; Gregory Destras; Gwendolyne Burfin; Hadrien Regue; Laurence Josset; Martine Valette; Quentin Semanas; Théophile Boyer                                                                                                                                                                                                                                                                                                                                                                                                                                                                                                                                                                                                                                                                                                                                                                                                                                                                                                                       |
| EPI_ISL_9749785                                                                                                                                                                                                                                                                                                                                                                                                                         | LESP Jalisco                                                   | Instituto de Diagnostico y Referencia<br>Epidemiologicos (INDRE)                                                                                                                                                                  | Abril Rodriguez-Maldonado; Ariadna Medina-Benitez; Claudia Wong-Arambula; Ernesto Ramirez-Gonzalez; Fernando Gonzalez-Dominguez; Gisela Barrera-Badillo; Irma Lopez-Martinez; Joaquin Quiroz-Mercado; Lucia Hernandez-Rivas; Maribel Gonzalez-Villa; Natividad Cruz-Ortiz; Sergio Rangel-Guerrero; Tatiana Nunez-Garcia; Vanessa Rivero-Arredondo                                                                                                                                                                                                                                                                                                                                                                                                                                                                                                                                                                                                                                                                                                                                 |
| EPI_ISL_9319169                                                                                                                                                                                                                                                                                                                                                                                                                         | LITBANGKES JKT                                                 | Balai Labkes PAK Prov Jateng                                                                                                                                                                                                      | Dyah Ayu Kunti Hapsari; Endah Wahyuni; Ismi Farhati; Purnomo; Sekti Handayani; Wiwik Peni; Yekti Hediningsih                                                                                                                                                                                                                                                                                                                                                                                                                                                                                                                                                                                                                                                                                                                                                                                                                                                                                                                                                                      |
| EPI_ISL_9520123                                                                                                                                                                                                                                                                                                                                                                                                                         | LPA BESANCON                                                   | Department of Virology, Henri Mondor<br>University Hospital, Assistance Publique<br>Hôpitaux de Paris, Université Paris-Est<br>Créteil, INSERM U955                                                                               | Alexandre Soulier; Christophe Rodriguez; Elisabeth Trawinski; Guillaume Gricourt; Jean-Michel Pawlotsky; Melissa N'Debi; Slim Fourati; Vanessa Demontant                                                                                                                                                                                                                                                                                                                                                                                                                                                                                                                                                                                                                                                                                                                                                                                                                                                                                                                          |
| EPI_ISL_9618959, EPI_ISL_9618960, EPI_ISL_9618961, EPI_ISL_9618965, EPI_ISL_9618966, EPI_ISL_9618967, EPI_ISL_9618968, EPI_ISL_9618976                                                                                                                                                                                                                                                                                                  | see above                                                      | Lab Klinik Utama Karunia                                                                                                                                                                                                          | National Institute of Health Research and<br>Development                                                                                                                                                                                                                                                                                                                                                                                                                                                                                                                                                                                                                                                                                                                                                                                                                                                                                                                                                                                                                          |
| EPI_ISL_8648589, EPI_ISL_8648614, EPI_ISL_8825489, EPI_ISL_8825526, EPI_ISL_8826112, EPI_ISL_8826201, EPI_ISL_8826244, EPI_ISL_8826342, EPI_ISL_8826352                                                                                                                                                                                                                                                                                 | see above                                                      | LabPLUS                                                                                                                                                                                                                           | Institute of Environmental Science and<br>Research (ESR)                                                                                                                                                                                                                                                                                                                                                                                                                                                                                                                                                                                                                                                                                                                                                                                                                                                                                                                                                                                                                          |
| EPI_ISL_9700106                                                                                                                                                                                                                                                                                                                                                                                                                         | Labkesda Soppeng                                               | National Institute of Health Research and<br>Development                                                                                                                                                                          | Arie Ardiansyah Nugraha; Fajar Nur Sulistyohadi; Hana Aparsi Pawestri; Hartanti Dian Ikawati; Kartika Dewi Puspa; Nelly Puspandari; Nur Ika Hariastuti; Putri Widia; Subangkit; Vivi Setiawaty                                                                                                                                                                                                                                                                                                                                                                                                                                                                                                                                                                                                                                                                                                                                                                                                                                                                                    |
| EPI_ISL_9245687,<br>EPI_ISL_9429118,<br>EPI_ISL_9429119                                                                                                                                                                                                                                                                                                                                                                                 | Labo Analyses Med                                              | National Reference Center for Viruses of<br>Respiratory Infections, Institut Pasteur,<br>Paris                                                                                                                                    | Angela Brisebarre; Aude LESENNE; Briec GESTIN; Camille Capel; Christophe Malabat; Corinne Maufrais; Etienne Simon-Lorière; Frédéric Lemoine; Julien Fumey; Louise Lefrançois; Marion Barbet; Maud Vanpeene; Méline Bizard; Slim El Khari; Sophie ZAFFREYA; Sylvie Behillili; Sylvie Van der Werf; Vincent Enouf                                                                                                                                                                                                                                                                                                                                                                                                                                                                                                                                                                                                                                                                                                                                                                   |
| EPI_ISL_9230474, EPI_ISL_9230481, EPI_ISL_9230486, EPI_ISL_9230497, EPI_ISL_9230504, EPI_ISL_9230517, EPI_ISL_9230520, EPI_ISL_9230536, EPI_ISL_9230547, EPI_ISL_9230558, EPI_ISL_9230570, EPI_ISL_9230581, EPI_ISL_9230590, EPI_ISL_9230596, EPI_ISL_9230605, EPI_ISL_9230615, EPI_ISL_9230631, EPI_ISL_9230644                                                                                                                        | see above                                                      | Labor Becker & Kollegen (Standort<br>München)                                                                                                                                                                                     | Robert Koch Institute                                                                                                                                                                                                                                                                                                                                                                                                                                                                                                                                                                                                                                                                                                                                                                                                                                                                                                                                                                                                                                                             |
| EPI_ISL_8927621, EPI_ISL_8927637, EPI_ISL_9012581, EPI_ISL_9012583, EPI_ISL_9012585, EPI_ISL_9012588, EPI_ISL_9012603, EPI_ISL_9012616, EPI_ISL_9489317, EPI_ISL_9489333, EPI_ISL_9489339, EPI_ISL_9489340, EPI_ISL_9489344, EPI_ISL_9489345                                                                                                                                                                                            | see above                                                      | Labor Berlin Charité Vivantes GmbH /<br>Institut für Virologie                                                                                                                                                                    | Charité Universitätsmedizin Berlin,<br>Institut für Virologie/Labor Berlin                                                                                                                                                                                                                                                                                                                                                                                                                                                                                                                                                                                                                                                                                                                                                                                                                                                                                                                                                                                                        |
| EPI_ISL_9106370                                                                                                                                                                                                                                                                                                                                                                                                                         | Labor Dr. Heidrich & Kollegen MVZ<br>GmbH Hamburg              | Robert Koch Institute                                                                                                                                                                                                             | Barbara Mühlemann; Christian Drosten; Christine Stephan; Peter Menzel; Rolf Schwarzer; Terry Jones; Victor M Corman                                                                                                                                                                                                                                                                                                                                                                                                                                                                                                                                                                                                                                                                                                                                                                                                                                                                                                                                                               |
| EPI_ISL_9210096,<br>EPI_ISL_9210098,<br>EPI_ISL_9210106                                                                                                                                                                                                                                                                                                                                                                                 | Labor Dr. Krause & Kollegen MVZ<br>GmbH Kiel                   | Robert Koch Institute                                                                                                                                                                                                             |                                                                                                                                                                                                                                                                                                                                                                                                                                                                                                                                                                                                                                                                                                                                                                                                                                                                                                                                                                                                                                                                                   |
| EPI_ISL_9103536,<br>EPI_ISL_9103610,<br>EPI_ISL_9103639,<br>EPI_ISL_9103642,<br>EPI_ISL_9211970                                                                                                                                                                                                                                                                                                                                         | Labor Lübeck bzw. Laborärztliche<br>Gemeinschaftspraxis Lübeck | Robert Koch Institute                                                                                                                                                                                                             |                                                                                                                                                                                                                                                                                                                                                                                                                                                                                                                                                                                                                                                                                                                                                                                                                                                                                                                                                                                                                                                                                   |
| EPI_ISL_8927260, EPI_ISL_9054612, EPI_ISL_9108592, EPI_ISL_9209347, EPI_ISL_9209356, EPI_ISL_9209382, EPI_ISL_9209646, EPI_ISL_9209652, EPI_ISL_9209669, EPI_ISL_9211263, EPI_ISL_9211268, EPI_ISL_9212271, EPI_ISL_9216052, EPI_ISL_9216283, EPI_ISL_9216394, EPI_ISL_9216611, EPI_ISL_9216619, EPI_ISL_9216626, EPI_ISL_9221483, EPI_ISL_9223230, EPI_ISL_9223234                                                                     | see above                                                      | Labor Mönchengladbach MVZ Dr. Stein<br>+ Kollegen GbR                                                                                                                                                                             | Robert Koch Institute                                                                                                                                                                                                                                                                                                                                                                                                                                                                                                                                                                                                                                                                                                                                                                                                                                                                                                                                                                                                                                                             |
| EPI_ISL_8680562                                                                                                                                                                                                                                                                                                                                                                                                                         | Laborarztpraxis Dres. med. Walther<br>Weindel & Kollegen       | Robert Koch Institute                                                                                                                                                                                                             |                                                                                                                                                                                                                                                                                                                                                                                                                                                                                                                                                                                                                                                                                                                                                                                                                                                                                                                                                                                                                                                                                   |
| EPI_ISL_9211921,<br>EPI_ISL_9218936                                                                                                                                                                                                                                                                                                                                                                                                     | Laborarztpraxis Osnabrück                                      | Robert Koch Institute                                                                                                                                                                                                             |                                                                                                                                                                                                                                                                                                                                                                                                                                                                                                                                                                                                                                                                                                                                                                                                                                                                                                                                                                                                                                                                                   |
| EPI_ISL_9181668,<br>EPI_ISL_9181711                                                                                                                                                                                                                                                                                                                                                                                                     | Laboratoire national de sante,<br>Microbiology, Virology       | Laboratoire national de sante,<br>Microbiology, Microbial Genomics<br>Platform                                                                                                                                                    | Anke Wienecke-Baldacchino; Catherine Ragimbeau; Elodie Solarino; Fatu Djabi; Jessica Tapp; Lise Pignon; Raoul Salmon; Sibel Berger; Tamir Abdelrahman; Trung Nguyen Nguyen; Virginie Jover                                                                                                                                                                                                                                                                                                                                                                                                                                                                                                                                                                                                                                                                                                                                                                                                                                                                                        |
| EPI_ISL_8812759                                                                                                                                                                                                                                                                                                                                                                                                                         | Laboratorio di Microbiologia                                   | Laboratorio di Microbiologia, Istituto di<br>Medicina di Laboratorio EOLAB, Ente<br>Ospedaliero Cantonale                                                                                                                         | Martinetti Lucchini Gladys; Valeria Spina                                                                                                                                                                                                                                                                                                                                                                                                                                                                                                                                                                                                                                                                                                                                                                                                                                                                                                                                                                                                                                         |
| EPI_ISL_9202536                                                                                                                                                                                                                                                                                                                                                                                                                         | Laboratorium Analiz Lekarskich ALAB<br>Szczecin Energetyków    | 1. Academic Center for<br>Pathomorphological and Genetic-<br>Molecular Diagnostics Ltd, Białystok,<br>Poland 2. National Institute of Public<br>Health - National Institute of Hygiene,<br>Warsaw, Poland                         | Anetta Sulewska; Jacek Nikliński; Janusz Dzieciol; Joanna Kiśluk; Katarzyna Zacharczuk; Konrad Raczkowski; Magdalena Nowakowska; Małgorzata Sadkowska-Todys; Piotr Karabowicz; Piotr Majewski; Przemyslaw Bieчек; Joanna Reszeć; Radoslaw Charkiewicz; Tomasz Wolkowicz                                                                                                                                                                                                                                                                                                                                                                                                                                                                                                                                                                                                                                                                                                                                                                                                           |
| EPI_ISL_9352776                                                                                                                                                                                                                                                                                                                                                                                                                         | Laboratorium Diagnostyczne Centrum<br>Medyczne LuxMed          | Wojewodzka Stacja Sanitarno-<br>Epidemiologiczna w Rzeszowie,<br>Laboratorium Diagnostyki Medycznej                                                                                                                               | Anna Nowakowska; Karolina Ostrowska; Katarzyna Wilk; Marzena Baranowska                                                                                                                                                                                                                                                                                                                                                                                                                                                                                                                                                                                                                                                                                                                                                                                                                                                                                                                                                                                                           |
| EPI_ISL_9266871                                                                                                                                                                                                                                                                                                                                                                                                                         | Laboratorium Diagnostyczne Maklab<br>Łęczna                    | 1. Tricity SARS-CoV-2 sequencing<br>consortium: University of Gdansk,<br>Medical University of Gdansk, Vaxican<br>Ltd., Invicta Ltd. 2. National Institute of<br>Public Health - National Institute of<br>Hygiene, Warsaw, Poland | Celina Cybulska; Karolina Gackowska; Katarzyna Groth; Katarzyna Zacharczuk; Krystyna Bienkowska Szewczyk; Lukasz Rabalski; Maciej Grzybek; Maciej Kosinski; Magdalena Nowakowska; Marcin Lubocki; Małgorzata Sadkowska-Todys; Tomasz Wolkowicz                                                                                                                                                                                                                                                                                                                                                                                                                                                                                                                                                                                                                                                                                                                                                                                                                                    |
| EPI_ISL_8930549                                                                                                                                                                                                                                                                                                                                                                                                                         | Laboratorium Medyczne GynCentrum -<br>Oddział Sosnowiec        | Wojewodzka Stacja Sanitarno-<br>Epidemiologiczna w Katowicach                                                                                                                                                                     | Adrian Miara; Agata Chajda; Beata Rozwadowska; Elzbieta Bartkowiak; Marta Alberyńska                                                                                                                                                                                                                                                                                                                                                                                                                                                                                                                                                                                                                                                                                                                                                                                                                                                                                                                                                                                              |
| EPI_ISL_8694481                                                                                                                                                                                                                                                                                                                                                                                                                         | Laboratorium Rumah Sakit Pusat<br>Pertamina                    | Genomik Solidaritas Indonesia<br>Laboratorium                                                                                                                                                                                     | Anna Christina Brazia; Annisa Muthiah Sukirman; Anuraj Shankar; Ariel Pradipta; Gracia Felias Enos Krompiss; Isman; Louisa Markus; Meutia Ayuputeri Kumaheri; Stefanus Bernard; Vania Gavriala Wikasa                                                                                                                                                                                                                                                                                                                                                                                                                                                                                                                                                                                                                                                                                                                                                                                                                                                                             |
| EPI_ISL_9042475,<br>EPI_ISL_9182379,<br>EPI_ISL_9339889                                                                                                                                                                                                                                                                                                                                                                                 | Laboratory Corporation of America                              | Centers for Disease Control and<br>Prevention Division of Viral Diseases,<br>Pathogen Discovery                                                                                                                                   | Amanda Douglas; Amanda Suchanek; Andrea Throop; Ayla Burns; Benjamin Rambo-Martin; Bobbi Croy; Brian Krueger; Brian Norvell; Christopher Gulvick; Christos Petropoulos; Clinton Paden; Craig Lukasik; Dakota Howard; Debbie Boles; Dhvani Batra; Duncan MacCannell; Eyad Almasri; Goran Stevoic; Howard Engler; Hrushikesh Deshmukh; Jake Humphrey; Jana Schroth; Jason Caravas; Joe Voshell; John Pruitt; Jonathan Meltzer; Jonathan Williams; Kimberly Wagner; Kristine Lacek; Lax Iyer; Lisa Pfeiffer; Lyndon Tilson; Manoj Jain; Marcia Eisenberg; Mary Cristobal; Mary Williamson; Matthew Robinson; Matthew Schmeier; Michael Levandoski; Mike Sapeta; Mindy Nye; Minoo Agarwal; Mohan Kolli; Nuthawin Charoensri; Oren Cohen; Peter Cook; Prashant Gupta; Qian Zeng; Rama Ghatti; Scott Parker; Scott Ryan; Scott Sammons; Shatavia Morrison; Stanley Letovsky; Steven Ragan; Suresh Selvaraju; Susan Countryman; Susan Hicks; Suzanne Dale; Thomas Urban; Tim Kuphal; Tricia Zwiefelhofer; Tymeckia Kendall; Victoria Caban Figueroa; Vincent Drouillon; Yvette Unoarumhi |
| EPI_ISL_9215833,<br>EPI_ISL_9215836,<br>EPI_ISL_9215843,<br>EPI_ISL_9215852                                                                                                                                                                                                                                                                                                                                                             | Labormedizin Darmstadt                                         | Robert Koch Institute                                                                                                                                                                                                             |                                                                                                                                                                                                                                                                                                                                                                                                                                                                                                                                                                                                                                                                                                                                                                                                                                                                                                                                                                                                                                                                                   |
| EPI_ISL_9324449, EPI_ISL_9324450, EPI_ISL_9324451, EPI_ISL_9324452, EPI_ISL_9324453, EPI_ISL_9324456, EPI_ISL_9324457, EPI_ISL_9324459, EPI_ISL_9324460, EPI_ISL_9324473, EPI_ISL_9324474, EPI_ISL_9324475, EPI_ISL_9324477, EPI_ISL_9324478, EPI_ISL_9324479, EPI_ISL_9324480, EPI_ISL_9324481, EPI_ISL_9324483, EPI_ISL_9324484, EPI_ISL_9324485, EPI_ISL_9324486, EPI_ISL_9324487, EPI_ISL_9324489, EPI_ISL_9324490, EPI_ISL_9324491 | see above                                                      | Laguna Provincial Hospital - San Pablo<br>City District Hospital                                                                                                                                                                  | Philippine Genome Center                                                                                                                                                                                                                                                                                                                                                                                                                                                                                                                                                                                                                                                                                                                                                                                                                                                                                                                                                                                                                                                          |
| EPI_ISL_9324488, EPI_ISL_9324489, EPI_ISL_9324490, EPI_ISL_9324491                                                                                                                                                                                                                                                                                                                                                                      | see above                                                      | Laguna Provincial Hospital - San Pablo<br>City District Hospital                                                                                                                                                                  | Alethea R. de Guzman; Alyssa Joyce E. Telles; Angelica A. Garcia; Anna Ong-Lim; Benedict A. Maralit; Carlo M. Lapid; Celia Carlos; Cynthia P. Saloma; Devon Ray Pacial; Diomedes A. Cariño; Edsel Maurice Salvana; El King D. Morado; Elicid Aaron R. Pangilinan; Eva Maria Cuntiong-de la Paz; Francis A. Tablizo; Henrietta Marie Rodriguez; Jaime C. Montoya; Jan Michael E. Gana; John Q. Wong; Johnny A. Ong; Joshua Gregor A. Dizon; Joshua Jose Endozo; Karol Sophia Agape R. Padilla; Kris P. Punayan; Kristina Patriz Dela Cruz; Lindsay Clare D. L. Carandang; Ma. Exanal Plantig; Marc Edsel C. Ayes; Maria Rosario Singh-Vergeire; Maria Sofia L. Yangzon; Marielle M. Gamba; Marissa Alejandria; Niña Francesca Bustamante; Razel Nikka M. Hao; Renato Jacinto Q. Mantaring; Rianna Patricia S. Cruz; Razel A. Medina; Shiela Mae M. Araiza; Yvonne Valerie Austria; Zipporah Mariebelle R. Enriquez; Zyrrel V. Mollejon                                                                                                                                             |

|                                                                                                                                                                                                                                                                                                                                                                                                                                                                                                                                                                                                                                                                                                                                                                                                                                                                                                                                                                                                                                                                                                                                                                                                                                                                                                                                                                                                                                                                                                                                                                                                                                                                                                                                  |                                                                                                                                |                                                                                                                                                                                      |                                                                                                                                                                                                                                                                                                                                                                                                                                                                                                                                                                                                                                                                                                                                                                                                                                                                                                                                                                                                 |
|----------------------------------------------------------------------------------------------------------------------------------------------------------------------------------------------------------------------------------------------------------------------------------------------------------------------------------------------------------------------------------------------------------------------------------------------------------------------------------------------------------------------------------------------------------------------------------------------------------------------------------------------------------------------------------------------------------------------------------------------------------------------------------------------------------------------------------------------------------------------------------------------------------------------------------------------------------------------------------------------------------------------------------------------------------------------------------------------------------------------------------------------------------------------------------------------------------------------------------------------------------------------------------------------------------------------------------------------------------------------------------------------------------------------------------------------------------------------------------------------------------------------------------------------------------------------------------------------------------------------------------------------------------------------------------------------------------------------------------|--------------------------------------------------------------------------------------------------------------------------------|--------------------------------------------------------------------------------------------------------------------------------------------------------------------------------------|-------------------------------------------------------------------------------------------------------------------------------------------------------------------------------------------------------------------------------------------------------------------------------------------------------------------------------------------------------------------------------------------------------------------------------------------------------------------------------------------------------------------------------------------------------------------------------------------------------------------------------------------------------------------------------------------------------------------------------------------------------------------------------------------------------------------------------------------------------------------------------------------------------------------------------------------------------------------------------------------------|
| EPI_ISL_8826423,<br>EPI_ISL_8826425<br>EPI_ISL_9213949                                                                                                                                                                                                                                                                                                                                                                                                                                                                                                                                                                                                                                                                                                                                                                                                                                                                                                                                                                                                                                                                                                                                                                                                                                                                                                                                                                                                                                                                                                                                                                                                                                                                           | Lancet Laboratories Gaborone<br>Landesgesundheitsamt Baden-Württemberg                                                         | Botswana Harvard HIV Reference Laboratory<br>Robert Koch Institute                                                                                                                   | Boitumelo Zuze; Botshelo Radibe; Dorcas Maruapala; Ellen Nkitse; Joseph Makheha; Keoratlle Ntshambisa; Kgomoiso Moruisi; Legodile Kooepile; Leyi Ncube; Mosana Moyo; Mosepole Mosepole; Mphaphi B. Mbulawa; Ontiametse T. Bareng; Pamela Smith-Lawrence; Roger Shapiro; Sefetogi Ramaola; Shahin Lockman; Sikhulle Moyo; Simani Gaseitswe; Thongbotho Mphoyakgosi; Wonderful T. Choga                                                                                                                                                                                                                                                                                                                                                                                                                                                                                                                                                                                                           |
| EPI_ISL_9025040, EPI_ISL_9025048, EPI_ISL_9025050, EPI_ISL_9123002, EPI_ISL_9123003, EPI_ISL_9123004, EPI_ISL_9123041, EPI_ISL_9123052, EPI_ISL_9123053, EPI_ISL_9123054, EPI_ISL_9123056, EPI_ISL_9123062, EPI_ISL_9123066                                                                                                                                                                                                                                                                                                                                                                                                                                                                                                                                                                                                                                                                                                                                                                                                                                                                                                                                                                                                                                                                                                                                                                                                                                                                                                                                                                                                                                                                                                      | see above                                                                                                                      | Lifebrain Covid Labor GmbH                                                                                                                                                           | Alexandra Wagner; Anna Edermayr; Filip Sima                                                                                                                                                                                                                                                                                                                                                                                                                                                                                                                                                                                                                                                                                                                                                                                                                                                                                                                                                     |
| EPI_ISL_8652801, EPI_ISL_8695989, EPI_ISL_8697532, EPI_ISL_8699904, EPI_ISL_8735350, EPI_ISL_8756581, EPI_ISL_8772672, EPI_ISL_8781653, EPI_ISL_8817669, EPI_ISL_8820149, EPI_ISL_8820438, EPI_ISL_8848611, EPI_ISL_8848694, EPI_ISL_8858477, EPI_ISL_8858628, EPI_ISL_8946031, EPI_ISL_8946273                                                                                                                                                                                                                                                                                                                                                                                                                                                                                                                                                                                                                                                                                                                                                                                                                                                                                                                                                                                                                                                                                                                                                                                                                                                                                                                                                                                                                                  | see above                                                                                                                      | Lighthouse Lab in Alderley Park                                                                                                                                                      | Wellcome Sanger Institute for the COVID-19 Genomics UK (COG-UK) Consortium<br>Cordelia Langford; David K. Jackson; Dominic Kwiatkowski; Ewan Harrison; Ian Johnston; Jacquelyn Wynn; Jeffrey Barrett; John Sillitoe on behalf of the Wellcome Sanger Institute COVID-19 Surveillance Team; Mairead Hyland; Roberto Amato; Sonia Goncalves; The Lighthouse Lab in Alderley Park and Alex Alderton                                                                                                                                                                                                                                                                                                                                                                                                                                                                                                                                                                                                |
| EPI_ISL_8531152, EPI_ISL_8575086, EPI_ISL_8695213, EPI_ISL_8699206, EPI_ISL_8701991, EPI_ISL_8740291, EPI_ISL_8741531, EPI_ISL_8777569, EPI_ISL_8821072, EPI_ISL_8864717                                                                                                                                                                                                                                                                                                                                                                                                                                                                                                                                                                                                                                                                                                                                                                                                                                                                                                                                                                                                                                                                                                                                                                                                                                                                                                                                                                                                                                                                                                                                                         | see above                                                                                                                      | Lighthouse Lab in Glasgow                                                                                                                                                            | Wellcome Sanger Institute for the COVID-19 Genomics UK (COG-UK) Consortium<br>Anna Dominiczak and Alex Alderton; Carol Clugston; Cordelia Langford; David Gray; David K. Jackson; Dominic Kwiatkowski; Ewan Harrison; Harper VanSteenhouse; Ian Johnston; Jeffrey Barrett; John Sillitoe on behalf of the Wellcome Sanger Institute COVID-19 Surveillance Team; Roberto Amato; Sonia Goncalves; Yumi Kasai                                                                                                                                                                                                                                                                                                                                                                                                                                                                                                                                                                                      |
| EPI_ISL_8489620, EPI_ISL_8489910, EPI_ISL_8531465, EPI_ISL_8532678, EPI_ISL_8532858, EPI_ISL_8535855, EPI_ISL_8536833, EPI_ISL_8536991, EPI_ISL_8537739, EPI_ISL_8537905, EPI_ISL_8570102, EPI_ISL_8572155, EPI_ISL_8573267, EPI_ISL_8574847, EPI_ISL_8619646, EPI_ISL_8657919, EPI_ISL_8660563, EPI_ISL_8664714, EPI_ISL_8695622, EPI_ISL_8695665, EPI_ISL_8698785, EPI_ISL_8698818, EPI_ISL_8698906, EPI_ISL_8700109, EPI_ISL_8735299, EPI_ISL_8735396, EPI_ISL_8736455, EPI_ISL_8737333, EPI_ISL_8737363, EPI_ISL_8756430, EPI_ISL_8756470, EPI_ISL_8756972, EPI_ISL_8757056, EPI_ISL_8757127, EPI_ISL_8757350, EPI_ISL_8758037, EPI_ISL_8758195, EPI_ISL_8758366, EPI_ISL_8758373, EPI_ISL_8758404, EPI_ISL_8758427, EPI_ISL_8758584, EPI_ISL_8758632, EPI_ISL_8758733, EPI_ISL_8759547, EPI_ISL_8759900, EPI_ISL_8759904, EPI_ISL_8759931, EPI_ISL_8759972, EPI_ISL_8760024, EPI_ISL_8760067, EPI_ISL_8760377, EPI_ISL_8770919, EPI_ISL_8771176, EPI_ISL_8771459, EPI_ISL_8771614, EPI_ISL_8772206, EPI_ISL_8772432, EPI_ISL_8773233, EPI_ISL_8773289, EPI_ISL_8773378, EPI_ISL_8773929, EPI_ISL_8775360, EPI_ISL_8775478, EPI_ISL_8775539, EPI_ISL_8775749, EPI_ISL_8775804, EPI_ISL_8775948, EPI_ISL_8775969, EPI_ISL_8775982, EPI_ISL_8777359, EPI_ISL_8778523, EPI_ISL_8778813, EPI_ISL_8778834, EPI_ISL_8779027, EPI_ISL_8779060, EPI_ISL_8779129, EPI_ISL_8779861, EPI_ISL_8779953, EPI_ISL_8780017, EPI_ISL_8780077, EPI_ISL_8780077, EPI_ISL_8781437, EPI_ISL_8782009, EPI_ISL_8782338, EPI_ISL_8817781, EPI_ISL_8820297, EPI_ISL_8822992, EPI_ISL_8823066, EPI_ISL_8861103, EPI_ISL_8861150, EPI_ISL_8861347, EPI_ISL_8861553, EPI_ISL_8861781, EPI_ISL_8863943, EPI_ISL_8864431, EPI_ISL_8946544, EPI_ISL_9002255 | see above                                                                                                                      | Lighthouse Lab in Milton Keynes                                                                                                                                                      | Wellcome Sanger Institute for the COVID-19 Genomics UK (COG-UK) Consortium<br>Cordelia Langford; David K. Jackson; Dominic Kwiatkowski; Ewan Harrison; Ian Johnston; Jeffrey Barrett; John Sillitoe on behalf of the Wellcome Sanger Institute COVID-19 Surveillance Team; Roberto Amato; Sonia Goncalves; The Lighthouse Lab in Milton Keynes and Alex Alderton                                                                                                                                                                                                                                                                                                                                                                                                                                                                                                                                                                                                                                |
| EPI_ISL_8735013,<br>EPI_ISL_8780771<br>EPI_ISL_9223182                                                                                                                                                                                                                                                                                                                                                                                                                                                                                                                                                                                                                                                                                                                                                                                                                                                                                                                                                                                                                                                                                                                                                                                                                                                                                                                                                                                                                                                                                                                                                                                                                                                                           | Lighthouse Laboratory Plymouth                                                                                                 | Wellcome Sanger Institute for the COVID-19 Genomics UK (COG-UK) Consortium                                                                                                           | Cordelia Langford; David K. Jackson; Dominic Kwiatkowski; Ewan Harrison; Ian Johnston; Jeffrey Barrett; John Sillitoe on behalf of the Wellcome Sanger Institute COVID-19 Surveillance Team; Lighthouse Laboratory Plymouth and Alex Alderton; Roberto Amato; Sonia Goncalves                                                                                                                                                                                                                                                                                                                                                                                                                                                                                                                                                                                                                                                                                                                   |
| EPI_ISL_9058025,<br>EPI_ISL_9058078,<br>EPI_ISL_9218759                                                                                                                                                                                                                                                                                                                                                                                                                                                                                                                                                                                                                                                                                                                                                                                                                                                                                                                                                                                                                                                                                                                                                                                                                                                                                                                                                                                                                                                                                                                                                                                                                                                                          | Limbach - MVZ Labor Vorpommern-Rügen Stralsund                                                                                 | Robert Koch Institute                                                                                                                                                                |                                                                                                                                                                                                                                                                                                                                                                                                                                                                                                                                                                                                                                                                                                                                                                                                                                                                                                                                                                                                 |
| EPI_ISL_9102808<br>EPI_ISL_9103295                                                                                                                                                                                                                                                                                                                                                                                                                                                                                                                                                                                                                                                                                                                                                                                                                                                                                                                                                                                                                                                                                                                                                                                                                                                                                                                                                                                                                                                                                                                                                                                                                                                                                               | Limbach - MVZ Labor Cottbus<br>Limbach - MVZ Labor Dr. Volkmann & Kollegen                                                     | Robert Koch Institute<br>Robert Koch Institute                                                                                                                                       |                                                                                                                                                                                                                                                                                                                                                                                                                                                                                                                                                                                                                                                                                                                                                                                                                                                                                                                                                                                                 |
| EPI_ISL_9073164,<br>EPI_ISL_9106321,<br>EPI_ISL_9106341,<br>EPI_ISL_9106347,<br>EPI_ISL_9110426,<br>EPI_ISL_9110427                                                                                                                                                                                                                                                                                                                                                                                                                                                                                                                                                                                                                                                                                                                                                                                                                                                                                                                                                                                                                                                                                                                                                                                                                                                                                                                                                                                                                                                                                                                                                                                                              | Limbach - MVZ Labor Ludwigsburg                                                                                                | Robert Koch Institute                                                                                                                                                                |                                                                                                                                                                                                                                                                                                                                                                                                                                                                                                                                                                                                                                                                                                                                                                                                                                                                                                                                                                                                 |
| EPI_ISL_9461240<br>EPI_ISL_9102820                                                                                                                                                                                                                                                                                                                                                                                                                                                                                                                                                                                                                                                                                                                                                                                                                                                                                                                                                                                                                                                                                                                                                                                                                                                                                                                                                                                                                                                                                                                                                                                                                                                                                               | Limbach - MVZ Labor Ravensburg Labor Dr. Gärtner<br>Limbach - MVZ Labor Westmecklenburg Schmdlach-Oswald-Kettermann & Kollegen | Robert Koch Institute<br>Robert Koch Institute                                                                                                                                       |                                                                                                                                                                                                                                                                                                                                                                                                                                                                                                                                                                                                                                                                                                                                                                                                                                                                                                                                                                                                 |
| EPI_ISL_9322850                                                                                                                                                                                                                                                                                                                                                                                                                                                                                                                                                                                                                                                                                                                                                                                                                                                                                                                                                                                                                                                                                                                                                                                                                                                                                                                                                                                                                                                                                                                                                                                                                                                                                                                  | Luis Hora Memorial Regional Hospital                                                                                           | Philippine Genome Center                                                                                                                                                             | Alethea R. de Guzman; Alyssa Joyce E. Telles; Angelica A. Garcia; Anna Ong-Lim; Benedict A. Maralit; Carlo M. Lapid; Celia Carlos; Cynthia P. Saloma; Devon Ray Pacial; Diomedes A. Cariño; Edsel Maurice Salvana; El King D. Morado; Elcid Aaron R. Pangilinan; Eva Maria Cutiongco-de la Paz; Francis A. Tablizo; Henrietta Marie Rodriguez; Jaime C. Montoya; Jan Michael C. Yap; Jarvin E. Nipales; Jo-Hannah S. Llamas; John Michael Egana; John Q. Wong; Johnny A. Ong; Joshua Jose Endozo; Karol Sophia Agape R. Padilla; Kris P. Punayan; Kristina Patriz Dela Cruz; Lindsay Clare D. L. Carandang; Ma. Exanil Plantig; Marc Edsel C. Ayes; Maria Rosario Singh-Vergeire; Maria Sofia L. Yangzon; Marielle M. Gamboa; Marissa Alejandria; Niña Francesca Bustamante; Razel Nikka M. Hao; Renato Jacinto Q. Mantaring; Rianna Patricia S. Cruz; Razel A. Medina; Shiela Mae M. Araiza; Yvonne Valerie Austria; Zipporah Mariebelle R. Enriquez; Zyrel V. Mollejon                        |
| EPI_ISL_9402817                                                                                                                                                                                                                                                                                                                                                                                                                                                                                                                                                                                                                                                                                                                                                                                                                                                                                                                                                                                                                                                                                                                                                                                                                                                                                                                                                                                                                                                                                                                                                                                                                                                                                                                  | M.P.Shah Government Medical College, Jamnagar                                                                                  | Gujarat Biotechnology Research Centre                                                                                                                                                | Akhilesh Modi; Apurvasinh Puvar; Bhadreshsinh Gohil; Chaitanya Joshi; Disha Vora; Janvi Raval; Jaykumar Rangani; Madhvi Joshi; Nimesh Patel; Nitin Savaliya; NitinShukla; Priyank Chavda; Ramesh Pandit; Roshani Mishra; Sonal Sharma; Tasnim Trivedi; Zarna Patel                                                                                                                                                                                                                                                                                                                                                                                                                                                                                                                                                                                                                                                                                                                              |
| EPI_ISL_9375622,<br>EPI_ISL_9375641                                                                                                                                                                                                                                                                                                                                                                                                                                                                                                                                                                                                                                                                                                                                                                                                                                                                                                                                                                                                                                                                                                                                                                                                                                                                                                                                                                                                                                                                                                                                                                                                                                                                                              | MAX HOSPITAL                                                                                                                   | ILBS                                                                                                                                                                                 | Amit Pandey; Arjun Bhugra; Chhagan Bihari Sharma; Ekta Gupta; Pramod Gautam; Priya Singh; Reshu Agarwal; Shiv Kumar Sarin; Urvinder Kaur; Varun Suroliya                                                                                                                                                                                                                                                                                                                                                                                                                                                                                                                                                                                                                                                                                                                                                                                                                                        |
| EPI_ISL_8669497, EPI_ISL_8682179, EPI_ISL_8683220, EPI_ISL_9055906, EPI_ISL_9056018, EPI_ISL_9057591, EPI_ISL_9057948, EPI_ISL_9072922, EPI_ISL_9073661, EPI_ISL_9108810, EPI_ISL_9108829, EPI_ISL_9108835, EPI_ISL_9108852, EPI_ISL_9108996, EPI_ISL_9209746, EPI_ISL_9209910, EPI_ISL_9209972, EPI_ISL_9210497, EPI_ISL_9212399, EPI_ISL_9216058, EPI_ISL_9216098, EPI_ISL_9216100, EPI_ISL_9216190, EPI_ISL_9216989, EPI_ISL_9217013, EPI_ISL_9223882, EPI_ISL_9224044                                                                                                                                                                                                                                                                                                                                                                                                                                                                                                                                                                                                                                                                                                                                                                                                                                                                                                                                                                                                                                                                                                                                                                                                                                                        | see above                                                                                                                      | MDI Limbach Berlin GmbH; MVZ Labor Berlin                                                                                                                                            | Robert Koch Institute                                                                                                                                                                                                                                                                                                                                                                                                                                                                                                                                                                                                                                                                                                                                                                                                                                                                                                                                                                           |
| EPI_ISL_9057188, EPI_ISL_9057206, EPI_ISL_9103602, EPI_ISL_9103614, EPI_ISL_9103616, EPI_ISL_9103621, EPI_ISL_9103676, EPI_ISL_9103691, EPI_ISL_9212154, EPI_ISL_9212202                                                                                                                                                                                                                                                                                                                                                                                                                                                                                                                                                                                                                                                                                                                                                                                                                                                                                                                                                                                                                                                                                                                                                                                                                                                                                                                                                                                                                                                                                                                                                         | see above                                                                                                                      | MVZ Dr. Eberhard & Partner Dortmund                                                                                                                                                  | Robert Koch Institute                                                                                                                                                                                                                                                                                                                                                                                                                                                                                                                                                                                                                                                                                                                                                                                                                                                                                                                                                                           |
| EPI_ISL_9074304,<br>EPI_ISL_9074676,<br>EPI_ISL_9074726,<br>EPI_ISL_9074867,<br>EPI_ISL_9106568,<br>EPI_ISL_9211745                                                                                                                                                                                                                                                                                                                                                                                                                                                                                                                                                                                                                                                                                                                                                                                                                                                                                                                                                                                                                                                                                                                                                                                                                                                                                                                                                                                                                                                                                                                                                                                                              | MVZ Labor Dr. Fenner und Kollegen (Standort Hamburg)                                                                           | Robert Koch Institute                                                                                                                                                                |                                                                                                                                                                                                                                                                                                                                                                                                                                                                                                                                                                                                                                                                                                                                                                                                                                                                                                                                                                                                 |
| EPI_ISL_8681776, EPI_ISL_8682188, EPI_ISL_8682248, EPI_ISL_9054582, EPI_ISL_9107462, EPI_ISL_9107465, EPI_ISL_9107469, EPI_ISL_9107476, EPI_ISL_9107494, EPI_ISL_9108578, EPI_ISL_9110113, EPI_ISL_9110123, EPI_ISL_9110408, EPI_ISL_9217018, EPI_ISL_9227890, EPI_ISL_9228701, EPI_ISL_9443435, EPI_ISL_9444471, EPI_ISL_9444562                                                                                                                                                                                                                                                                                                                                                                                                                                                                                                                                                                                                                                                                                                                                                                                                                                                                                                                                                                                                                                                                                                                                                                                                                                                                                                                                                                                                | see above                                                                                                                      | MVZ Labor Dr. Limbach & Kollegen GbR<br>MVZ Labor Dr. Reising-Ackermann und Kollegen                                                                                                 | Robert Koch Institute<br>Robert Koch Institute                                                                                                                                                                                                                                                                                                                                                                                                                                                                                                                                                                                                                                                                                                                                                                                                                                                                                                                                                  |
| EPI_ISL_9055901,<br>EPI_ISL_9055916,<br>EPI_ISL_9057805,<br>EPI_ISL_9108907                                                                                                                                                                                                                                                                                                                                                                                                                                                                                                                                                                                                                                                                                                                                                                                                                                                                                                                                                                                                                                                                                                                                                                                                                                                                                                                                                                                                                                                                                                                                                                                                                                                      | MVZ Medizinisches Labor Hannover GmbH                                                                                          | Robert Koch Institute                                                                                                                                                                |                                                                                                                                                                                                                                                                                                                                                                                                                                                                                                                                                                                                                                                                                                                                                                                                                                                                                                                                                                                                 |
| EPI_ISL_9075809, EPI_ISL_9075860, EPI_ISL_9075956, EPI_ISL_9075975, EPI_ISL_9076222, EPI_ISL_9076253, EPI_ISL_9106433, EPI_ISL_9110360, EPI_ISL_9110364, EPI_ISL_9110372, EPI_ISL_9110374, EPI_ISL_9110467, EPI_ISL_9110470, EPI_ISL_9110478, EPI_ISL_9110508, EPI_ISL_9110512, EPI_ISL_9110514, EPI_ISL_9110519, EPI_ISL_9110523, EPI_ISL_9110530, EPI_ISL_9209695, EPI_ISL_9209716, EPI_ISL_9210026                                                                                                                                                                                                                                                                                                                                                                                                                                                                                                                                                                                                                                                                                                                                                                                                                                                                                                                                                                                                                                                                                                                                                                                                                                                                                                                            | see above                                                                                                                      | MVZ für Laboratoriumsmedizin und Mikrobiologie Koblenz-Mittelrhein (Labor Koblenz)                                                                                                   | Robert Koch Institute                                                                                                                                                                                                                                                                                                                                                                                                                                                                                                                                                                                                                                                                                                                                                                                                                                                                                                                                                                           |
| EPI_ISL_9211817,<br>EPI_ISL_9211828<br>EPI_ISL_9023188<br>EPI_ISL_90728960                                                                                                                                                                                                                                                                                                                                                                                                                                                                                                                                                                                                                                                                                                                                                                                                                                                                                                                                                                                                                                                                                                                                                                                                                                                                                                                                                                                                                                                                                                                                                                                                                                                       | MVZ für Laboratoriumsmedizin und Mikrobiologie Würzburg<br>Manglam In Vitro Laboratory, Rajkot<br>MapMyGenome                  | Robert Koch Institute<br>Robert Koch Institute<br>Gujarat Biotechnology Research Centre<br>CSIR-Centre for Cellular and Molecular Biology-INSACOG                                    | Akhilesh Modi; Apurvasinh Puvar; Bhadreshsinh Gohil; Chaitanya Joshi; Disha Vora; Janvi Raval; Jaykumar Rangani; Madhvi Joshi; Nimesh Patel; Nitin Savaliya; NitinShukla; Priyank Chavda; Rahul Thumbar; Ramesh Pandit; Roshani Mishra; Sonal Sharma; Tasnim Trivedi; Zarna Patel<br>Amreshwar Vodapalli; Anuradha Acharya; Ara Sreenivas; Archana Bharadwaj Siva; B Himasri; Divya Tej Sowpati; Jandhyala Sai Krishna; Karthik Bharadwaj Tallapaka; Lamuk Zaveri; M. Aravind Kumar; Malini Nemalikanti; Priya Nurkuthy; Rakesh K Mishra; S.P.S. Satish; Sandhya Kiran; Shreekant Verma; Sreelekshmi MS; Sumedha Avadhanula; Surabhi Srivastava; Tulasi Nagabandi; Valli Nagalakshmi Undamatta; Vidhyadhari Methuku                                                                                                                                                                                                                                                                             |
| EPI_ISL_9322859                                                                                                                                                                                                                                                                                                                                                                                                                                                                                                                                                                                                                                                                                                                                                                                                                                                                                                                                                                                                                                                                                                                                                                                                                                                                                                                                                                                                                                                                                                                                                                                                                                                                                                                  | Mariano Marcos Memorial Hospital And Medical Center                                                                            | Philippine Genome Center                                                                                                                                                             | Alethea R. de Guzman; Alyssa Joyce E. Telles; Angelica A. Garcia; Anna Ong-Lim; Benedict A. Maralit; Carlo M. Lapid; Celia Carlos; Cynthia P. Saloma; Devon Ray Pacial; Diomedes A. Cariño; Edsel Maurice Salvana; El King D. Morado; Elcid Aaron R. Pangilinan; Eva Maria Cutiongco-de la Paz; Francis A. Tablizo; Henrietta Marie Rodriguez; Jaime C. Montoya; Jan Michael C. Yap; Jarvin E. Nipales; Jo-Hannah S. Llamas; John Michael Egana; John Q. Wong; Johnny A. Ong; Joshua Gregor A. Dizon; Joshua Jose Endozo; Karol Sophia Agape R. Padilla; Kris P. Punayan; Kristina Patriz Dela Cruz; Lindsay Clare D.L. Carandang; Ma. Exanil Plantig; Marc Edsel C. Ayes; Maria Rosario Singh-Vergeire; Maria Sofia L. Yangzon; Marielle M. Gamboa; Marissa Alejandria; Niña Francesca Bustamante; Razel Nikka M. Hao; Renato Jacinto Q. Mantaring; Rianna Patricia S. Cruz; Razel A. Medina; Shiela Mae M. Araiza; Yvonne Valerie Austria; Zipporah Mariebelle R. Enriquez; Zyrel V. Mollejon |
| EPI_ISL_9227196, EPI_ISL_9227197, EPI_ISL_9227198, EPI_ISL_9227201, EPI_ISL_9460792, EPI_ISL_9480441, EPI_ISL_9480442, EPI_ISL_9649906, EPI_ISL_9649921, EPI_ISL_9649926, EPI_ISL_9650013, EPI_ISL_9650072                                                                                                                                                                                                                                                                                                                                                                                                                                                                                                                                                                                                                                                                                                                                                                                                                                                                                                                                                                                                                                                                                                                                                                                                                                                                                                                                                                                                                                                                                                                       | see above                                                                                                                      | Medical Microbiology Unit, Department for Laboratory Medicine, Drammen Hospital, Vestre Viken Health Trust                                                                           | Norwegian Institute of Public Health, Department of Virology<br>Atiya R Ali; Debec Nadia; Engebretsen Serina Beate; Garcia Llorente Ignacio; Hilde Elshaug; Hilde Nordby Falkenhaus; Hilde Vollan; Jon Bråte; Kamilla Heddeland Insetfjord; Karoline Bragstad; Kathrine Stene-Johansen; Line Victoria Moen; Marie Paulsen Madsen; Olav Hungnes; Pedersen Benedikte Nevjen; Rasmus Riis Kopperud                                                                                                                                                                                                                                                                                                                                                                                                                                                                                                                                                                                                 |
| EPI_ISL_9072629<br>EPI_ISL_9057254<br>EPI_ISL_8975925                                                                                                                                                                                                                                                                                                                                                                                                                                                                                                                                                                                                                                                                                                                                                                                                                                                                                                                                                                                                                                                                                                                                                                                                                                                                                                                                                                                                                                                                                                                                                                                                                                                                            | Medizinische Laboratorien Düsseldorf<br>Medizinisches Labor Wahl Lüdenscheid<br>Medyczne Laboratorium Diagnostyka Warszawa     | Robert Koch Institute<br>Robert Koch Institute<br>1. Academic Center for Pathomorphological and Genetic-Molecular Diagnostics Ltd, Białystok, Poland 2. National Institute of Public | Anetta Sulewska; Jacek Nikiłski; Janusz Dzięcioł; Joanna Kiśluk; Katarzyna Zacharczuk; Konrad Raczkowski; Magdalena Nowakowska; Małgorzata Sadkowska-Todys; Piotr Karabowicz; Piotr Majewski; Przemysław Biecek. Joanna Reszeć; Radosław Charkiewicz; Tomasz Wolkowicz                                                                                                                                                                                                                                                                                                                                                                                                                                                                                                                                                                                                                                                                                                                          |

| Health - National Institute of Hygiene,<br>Warsaw, Poland                                                                                                                                                                                                                                                                                                                                                                                                                                                                                                                                                                                                                                                                                                                                                                                                                                                                                                                                                                                                                                                                                                                                                                                                                                                                                                                                                                                                                                                                                                                               |                                                                                                    |                                                                                                                                                                                           |                                                                                                                                                                                                                                                                                                                                                                                                                                                                                                                                                                                                                                                                                                                                                                                                                                                                                                                                                                                                  |
|-----------------------------------------------------------------------------------------------------------------------------------------------------------------------------------------------------------------------------------------------------------------------------------------------------------------------------------------------------------------------------------------------------------------------------------------------------------------------------------------------------------------------------------------------------------------------------------------------------------------------------------------------------------------------------------------------------------------------------------------------------------------------------------------------------------------------------------------------------------------------------------------------------------------------------------------------------------------------------------------------------------------------------------------------------------------------------------------------------------------------------------------------------------------------------------------------------------------------------------------------------------------------------------------------------------------------------------------------------------------------------------------------------------------------------------------------------------------------------------------------------------------------------------------------------------------------------------------|----------------------------------------------------------------------------------------------------|-------------------------------------------------------------------------------------------------------------------------------------------------------------------------------------------|--------------------------------------------------------------------------------------------------------------------------------------------------------------------------------------------------------------------------------------------------------------------------------------------------------------------------------------------------------------------------------------------------------------------------------------------------------------------------------------------------------------------------------------------------------------------------------------------------------------------------------------------------------------------------------------------------------------------------------------------------------------------------------------------------------------------------------------------------------------------------------------------------------------------------------------------------------------------------------------------------|
| EPI_ISL_9323167, EPI_ISL_9323168, EPI_ISL_9323169, EPI_ISL_9323170                                                                                                                                                                                                                                                                                                                                                                                                                                                                                                                                                                                                                                                                                                                                                                                                                                                                                                                                                                                                                                                                                                                                                                                                                                                                                                                                                                                                                                                                                                                      | Metro Iloilo Hospital And Medical Center                                                           | Philippine Genome Center                                                                                                                                                                  | Alethea R. de Guzman; Alyssa Joyce E. Telles; Angelica A. Garcia; Anna Ong-Lim; Benedict A. Maralit; Carlo M. Lapid; Celia Carlos; Cynthia P. Saloma; Devon Ray Pacial; Diomedes A. Cariño; Edsel Maurice Salvana; El King D. Morado; Elicid Aaron R. Pangilinan; Eva Maria Cutingco-de la Paz; Francis A. Tablizo; Henrietta Marie Rodriguez; Jaime C. Montoya; Jan Michael C. Yap; Jarvin E. Nipales; Jo-Hannah S. Llamas; John Michael Egana; John Q. Wong; Johnny A. Ong; Joshua Gregor A. Dixon; Joshua Jose Endozo; Karol Sophia Agape R. Padilla; Kris P. Punayan; Kristina Patriz Dela Cruz; Lindsay Claire D.L. Carandang; Ma. Examil Plantig; Marc Edsel C. Ayes; Maria Rosario Singh-Vergeire; Maria Sofia L. Yangzon; Marielle M. Gamboa; Marissa Alejandria; Niña Francesca Bustamante; Razel Nikka M. Hao; Renato Jacinto Q. Mantaring; Rianna Patricia S. Cruz; Razel A. Medina; Shiela Mae M. Araiza; Yvonne Valerie Austria; Zipporah Mariebelle R. Enriquez; Zyrel V. Mollejon |
| EPI_ISL_8826115, EPI_ISL_8826126, EPI_ISL_8826198, EPI_ISL_8826248, EPI_ISL_8826343, EPI_ISL_8826358                                                                                                                                                                                                                                                                                                                                                                                                                                                                                                                                                                                                                                                                                                                                                                                                                                                                                                                                                                                                                                                                                                                                                                                                                                                                                                                                                                                                                                                                                    | Middlemore Hospital                                                                                | Institute of Environmental Science and Research (ESR)                                                                                                                                     | Anja Werno; Antje van der Linden; Arlo Upton; Chris Mansell; Clare Gebbie; David Hammer; Dhanisha Patel; Dragana Drinkovic; Erasmus Smit; Gary McAuliffe; Hana Sofia Andersson; Hermes Perez; James Usher; Jill Sherwood; Jing Wang; Joep de Ligt; Jo Freeman; Julia Howard; Juliet Elvy; Lauren Kelly; Mary DeAlmeida; Matt Blackiston; Matt Storey; Matthew Rogers; Max Bloomfield; Michael Addidie; Michelle Balm; Muhammad Faisal; Nikki Freed; Olim Slander; Olivia Stroevers; Rachel Boyle; Sally Roberts; SallyAnn Harbison; Sarah Cockerton; Sarah Jefferies; Sharmini Muttayyan; Susan Morphett; Susan Taylor; Timothy Blackmore; Vani Sathyendran; Veronica Playle; Virginia Hope; Xiaoyun Ren                                                                                                                                                                                                                                                                                         |
| EPI_ISL_9693056                                                                                                                                                                                                                                                                                                                                                                                                                                                                                                                                                                                                                                                                                                                                                                                                                                                                                                                                                                                                                                                                                                                                                                                                                                                                                                                                                                                                                                                                                                                                                                         | Moka                                                                                               | National Institute for Communicable Diseases of the National Health Laboratory Service                                                                                                    | Amoako DG; Bhiman JN; Everatt J; Ismail A; Kekana D; Mahangu B; Maphala G; Mnguni A; Mohale T; Ntuli N; Scheepers C; Wolter N                                                                                                                                                                                                                                                                                                                                                                                                                                                                                                                                                                                                                                                                                                                                                                                                                                                                    |
| EPI_ISL_9023194, EPI_ISL_9023196, EPI_ISL_9023197, EPI_ISL_9023198                                                                                                                                                                                                                                                                                                                                                                                                                                                                                                                                                                                                                                                                                                                                                                                                                                                                                                                                                                                                                                                                                                                                                                                                                                                                                                                                                                                                                                                                                                                      | Molecular lab, Shree Krishna Hospital, Karamsd, Anand                                              | Gujarat Biotechnology Research Centre                                                                                                                                                     | Akhilesh Modi; Apurvashin Pvuar; Bhadeshsinh Gohil; Chaitanya Joshi; Chirag; Disha Vora; Janvi Ravai; Jaykumar Rangani; Madhvi Joshi; Mustafa; Nimesh Patel; Nitin Savaliya; NitinShukla; Priyank Chavda; Ramesh Pandit; Roshani Mishra; Sonal Sharma; Tasnim Trivedi; Zarna Patel                                                                                                                                                                                                                                                                                                                                                                                                                                                                                                                                                                                                                                                                                                               |
| EPI_ISL_9274899                                                                                                                                                                                                                                                                                                                                                                                                                                                                                                                                                                                                                                                                                                                                                                                                                                                                                                                                                                                                                                                                                                                                                                                                                                                                                                                                                                                                                                                                                                                                                                         | Molecular unit, Clinical Pathology Laboratory, Medical correctional Institution                    | Center for Medical Genomics Ramathibodi Hospital                                                                                                                                          | Anek mungaomklang; Insee Sensorsn; Inthoun Ratchatasethakul; Kanyarat Janthima; Parsakorn Tapaopong; Paramate Jiarana; Vichapon Tiacharoen; Wasun Chantraita                                                                                                                                                                                                                                                                                                                                                                                                                                                                                                                                                                                                                                                                                                                                                                                                                                     |
| EPI_ISL_8529192, EPI_ISL_8529481, EPI_ISL_8529660, EPI_ISL_8530040, EPI_ISL_8579421, EPI_ISL_8583156, EPI_ISL_8583182, EPI_ISL_8583392, EPI_ISL_8611002, EPI_ISL_8611315, EPI_ISL_8612093, EPI_ISL_8654701, EPI_ISL_8655723, EPI_ISL_8657162, EPI_ISL_8659984, EPI_ISL_8700583, EPI_ISL_8704231, EPI_ISL_8705578, EPI_ISL_8767381, EPI_ISL_8767582, EPI_ISL_8767750, EPI_ISL_8767797, EPI_ISL_8768014, EPI_ISL_8768022, EPI_ISL_8768236, EPI_ISL_8768251, EPI_ISL_8768373, EPI_ISL_8831710, EPI_ISL_8831722, EPI_ISL_8831818, EPI_ISL_8832022, EPI_ISL_8832125, EPI_ISL_8832311, EPI_ISL_8832448, EPI_ISL_8832968, EPI_ISL_8833245, EPI_ISL_8833294, EPI_ISL_8833666, EPI_ISL_8833669, EPI_ISL_8834085, EPI_ISL_8834147, EPI_ISL_8834267, EPI_ISL_8834274, EPI_ISL_8834352, EPI_ISL_8834395, EPI_ISL_8834943, EPI_ISL_8835090, EPI_ISL_9008037, EPI_ISL_9011358, EPI_ISL_9011414, EPI_ISL_9011545, EPI_ISL_9011553, EPI_ISL_9011559, EPI_ISL_9011861, EPI_ISL_9455536                                                                                                                                                                                                                                                                                                                                                                                                                                                                                                                                                                                                                   | Statens Serum Institut Bioinformatics and Microbial Genomics                                       | Danish Covid-19 Genome Consortium                                                                                                                                                         |                                                                                                                                                                                                                                                                                                                                                                                                                                                                                                                                                                                                                                                                                                                                                                                                                                                                                                                                                                                                  |
| EPI_ISL_8528742, EPI_ISL_8528743, EPI_ISL_8528744, EPI_ISL_8564598, EPI_ISL_8565061, EPI_ISL_8565090, EPI_ISL_8565110, EPI_ISL_8565324, EPI_ISL_8565504, EPI_ISL_8611181, EPI_ISL_8611811, EPI_ISL_8612434, EPI_ISL_8612677, EPI_ISL_8613927, EPI_ISL_8614276, EPI_ISL_8614650, EPI_ISL_8614958, EPI_ISL_8615102, EPI_ISL_8615340, EPI_ISL_8615575, EPI_ISL_8617777, EPI_ISL_8620889, EPI_ISL_8622885                                                                                                                                                                                                                                                                                                                                                                                                                                                                                                                                                                                                                                                                                                                                                                                                                                                                                                                                                                                                                                                                                                                                                                                   | see above                                                                                          | Molekylær Medicinsk Afdeling, Aarhus University Hospital, Aarhus, Denmark                                                                                                                 |                                                                                                                                                                                                                                                                                                                                                                                                                                                                                                                                                                                                                                                                                                                                                                                                                                                                                                                                                                                                  |
| see above                                                                                                                                                                                                                                                                                                                                                                                                                                                                                                                                                                                                                                                                                                                                                                                                                                                                                                                                                                                                                                                                                                                                                                                                                                                                                                                                                                                                                                                                                                                                                                               | Multidisciplinary Research Unit, Institute of Medical Sciences, Banaras Hindu University, Varanasi | Multidisciplinary Research Unit, Institute of Medical Sciences, Banaras Hindu University, Varanasi                                                                                        | Abhay Kumar Yadav; Ajay Kumar Yadav; Ajay Yadav; Amit kumar Nayak; Anil kumar Maurya; Archana; Arup acharyee; Ashish; Bhupendra Kumar; Bhupendra kumar; Chetan Sahni; Deepa Devadas; Gunjan Rai; Janhavi Yadav; Jay Prakash Maurya; Kapil Malviya; Khushboo Kumari; Manpreet Kaur; Narjis Mishra; Tribhuvan Mohan Mohapatra; Tripti Anand; Umesh choudhry; shivam Tiwari; shivani mishra                                                                                                                                                                                                                                                                                                                                                                                                                                                                                                                                                                                                         |
| EPI_ISL_9686864                                                                                                                                                                                                                                                                                                                                                                                                                                                                                                                                                                                                                                                                                                                                                                                                                                                                                                                                                                                                                                                                                                                                                                                                                                                                                                                                                                                                                                                                                                                                                                         | NHLS Port Elizabeth Laboratory                                                                     | CERI, Centre for Epidemic Response and Innovation, Stellenbosch University and KRISP, KZN Research Innovation and Sequencing Platform, UKZN.                                              | Anyaneji UJ; Gwandhari J; Maharaj A; Moir M; Naicker D; Naidoo Y; Nokukhanya Mdlalose; Oluwakemi Laguda-Akingba; Pillay S; San JE; Tegally H; Tshiabula D; Van Wyk S; Wilkinson E; de Oliveira T                                                                                                                                                                                                                                                                                                                                                                                                                                                                                                                                                                                                                                                                                                                                                                                                 |
| EPI_ISL_9662281, EPI_ISL_9662292, EPI_ISL_9662293, EPI_ISL_9662310, EPI_ISL_9662315, EPI_ISL_9662319, EPI_ISL_9662337                                                                                                                                                                                                                                                                                                                                                                                                                                                                                                                                                                                                                                                                                                                                                                                                                                                                                                                                                                                                                                                                                                                                                                                                                                                                                                                                                                                                                                                                   | see above                                                                                          | NHLS Universitas Academic                                                                                                                                                                 | UFS Virology<br>D Goedhals; Emmanuel Ogunbayo; MM Nyaga; MT Mogotsi; P Nthiga; PA Bester; T de Oliveira                                                                                                                                                                                                                                                                                                                                                                                                                                                                                                                                                                                                                                                                                                                                                                                                                                                                                          |
| EPI_ISL_8817278                                                                                                                                                                                                                                                                                                                                                                                                                                                                                                                                                                                                                                                                                                                                                                                                                                                                                                                                                                                                                                                                                                                                                                                                                                                                                                                                                                                                                                                                                                                                                                         | NJDOH, Public Health and Environmental Laboratories                                                | NJ_PHEL                                                                                                                                                                                   | Allison Roder; Byeong Jeong; Chelsea San Filippo; Dana Woel; Jacquelyn Deverell; Lindsey Bodnar; Maria-Magdalene Pugliese; Mohammad M. Ali; Shiv K. Verma                                                                                                                                                                                                                                                                                                                                                                                                                                                                                                                                                                                                                                                                                                                                                                                                                                        |
| EPI_ISL_8975963, EPI_ISL_8975995, EPI_ISL_8976093                                                                                                                                                                                                                                                                                                                                                                                                                                                                                                                                                                                                                                                                                                                                                                                                                                                                                                                                                                                                                                                                                                                                                                                                                                                                                                                                                                                                                                                                                                                                       | NZOO MEDIGEN MORCINKA 5, WARSZAWA                                                                  | 1. Academic Center for Pathomorphological and Genetic-Molecular Diagnostics Ltd, Białystok, Poland 2. National Institute of Public Health - National Institute of Hygiene, Warsaw, Poland | Anetta Sulewska; Jacek Nikiłski; Janusz Dzięcioł; Joanna Kisłuk; Katarzyna Zacharczuk; Konrad Raczkowski; Magdalena Nowakowska; Małgorzata Sadkowska-Todys; Piotr Karabowicz; Piotr Majewski; Przemysław Biełek. Joanna Reszeć; Radosław Charkiewicz; Tomasz Wolkowicz                                                                                                                                                                                                                                                                                                                                                                                                                                                                                                                                                                                                                                                                                                                           |
| EPI_ISL_9571280, EPI_ISL_9571284, EPI_ISL_9571285, EPI_ISL_9571293, EPI_ISL_9571294, EPI_ISL_9571295, EPI_ISL_9571296, EPI_ISL_9571301, EPI_ISL_9571302, EPI_ISL_9571303, EPI_ISL_9702300                                                                                                                                                                                                                                                                                                                                                                                                                                                                                                                                                                                                                                                                                                                                                                                                                                                                                                                                                                                                                                                                                                                                                                                                                                                                                                                                                                                               | see above                                                                                          | Narayana Medical Center                                                                                                                                                                   | National Institute of Health Research and Development<br>Arie Ardiansyah Nugraha; Fajar Nur Sulistiyohadi; Hana Apsari Pawestri; Hartanti Dian Ikawati; Kartika Dewi Puspa; Nelly Puspandari; Nur Ika Hariastuti; Putri Widia; Subangkit; Vivi Setiawaty                                                                                                                                                                                                                                                                                                                                                                                                                                                                                                                                                                                                                                                                                                                                         |
| EPI_ISL_9397181                                                                                                                                                                                                                                                                                                                                                                                                                                                                                                                                                                                                                                                                                                                                                                                                                                                                                                                                                                                                                                                                                                                                                                                                                                                                                                                                                                                                                                                                                                                                                                         | Narayana Medical Center Bekasi                                                                     | National Institute of Health Research and Development                                                                                                                                     | Arie Ardiansyah Nugraha; Fajar Nur Sulistiyohadi; Hana Apsari Pawestri; Hartanti Dian Ikawati; Kartika Dewi Puspa; Nelly Puspandari; Nur Ika Hariastuti; Putri Widia; Subangkit; Vivi Setiawaty                                                                                                                                                                                                                                                                                                                                                                                                                                                                                                                                                                                                                                                                                                                                                                                                  |
| EPI_ISL_8637981, EPI_ISL_8638000, EPI_ISL_8826484, EPI_ISL_8826485, EPI_ISL_9342568, EPI_ISL_9342570, EPI_ISL_9342572, EPI_ISL_9342577, EPI_ISL_9342578                                                                                                                                                                                                                                                                                                                                                                                                                                                                                                                                                                                                                                                                                                                                                                                                                                                                                                                                                                                                                                                                                                                                                                                                                                                                                                                                                                                                                                 | see above                                                                                          | National Health Laboratory                                                                                                                                                                | Botswana Harvard HIV Reference Laboratory<br>Boitumelo J. L. Zuze; Boitumelo Zuze; Botshelo Radibe; Dorcas Maruapula; Joseph Makhema; Keoratile Ntshambiwa; Kgomoetso Moruisi; Legodile Koopelip; Letsibogo Gaoralwe; Mosepele Mosepele; Mphaphi B. Mbulawa; Ontlametse T. Bareng; Pamela Smith-Lawrence; Roger Shapiro; Sefetogi Ramaolaga; Shahin Lockman; Sikhulle Moyo; Simani Gasetitsiwe; Thela Tefelo; Thongtho Mphoyakgosi; Wonderful T. Choga                                                                                                                                                                                                                                                                                                                                                                                                                                                                                                                                           |
| EPI_ISL_8688130, EPI_ISL_8688131, EPI_ISL_8688133, EPI_ISL_8688144, EPI_ISL_8896456, EPI_ISL_8896461, EPI_ISL_8896467, EPI_ISL_8896468, EPI_ISL_8896471, EPI_ISL_8896474, EPI_ISL_8896476, EPI_ISL_8896477, EPI_ISL_8896479, EPI_ISL_8896480                                                                                                                                                                                                                                                                                                                                                                                                                                                                                                                                                                                                                                                                                                                                                                                                                                                                                                                                                                                                                                                                                                                                                                                                                                                                                                                                            | see above                                                                                          | National Health Laboratory Service, KwaZulu-Natal, South Africa                                                                                                                           | CERI, Centre for Epidemic Response and Innovation, Stellenbosch University and KRISP, KZN Research Innovation and Sequencing Platform, UKZN.<br>Arisha Maharaj; Gwandhari J; Moir M; Naidoo Y; Nokukhanya Mdlalose; Pillay S; Ramphal U; Ramphal Y; San JE; Tegally H; Tshiabula D; Van Wyk S; Wilkinson E; de Oliveira T; van Wyk S                                                                                                                                                                                                                                                                                                                                                                                                                                                                                                                                                                                                                                                             |
| EPI_ISL_9328441                                                                                                                                                                                                                                                                                                                                                                                                                                                                                                                                                                                                                                                                                                                                                                                                                                                                                                                                                                                                                                                                                                                                                                                                                                                                                                                                                                                                                                                                                                                                                                         | National Health Laboratory Services                                                                | CERI, Centre for Epidemic Response and Innovation, Stellenbosch University and KRISP, KZN Research Innovation and Sequencing Platform, UKZN.                                              | Anyaneji UJ; Gwandhari J; Maharaj A; Moir M; Naicker D; Naidoo Y; Nokukhanya Mdlalose; Pillay S; San JE; Tegally H; Tshiabula D; Van Wyk S; Wilkinson E; de Oliveira T                                                                                                                                                                                                                                                                                                                                                                                                                                                                                                                                                                                                                                                                                                                                                                                                                           |
| EPI_ISL_9072296, EPI_ISL_9072297, EPI_ISL_9072298, EPI_ISL_9072304, EPI_ISL_9072305, EPI_ISL_9072307, EPI_ISL_9072309, EPI_ISL_9072311, EPI_ISL_9072315, EPI_ISL_9072319, EPI_ISL_9072323                                                                                                                                                                                                                                                                                                                                                                                                                                                                                                                                                                                                                                                                                                                                                                                                                                                                                                                                                                                                                                                                                                                                                                                                                                                                                                                                                                                               | see above                                                                                          | National Health Laboratory Services, Virology                                                                                                                                             | CERI, Centre for Epidemic Response and Innovation, Stellenbosch University and KRISP, KZN Research Innovation and Sequencing Platform, UKZN.<br>Avani Bharuthram; Florette Treurnicht; Gwandhari J; Kathleen Subramoney; Moir M; Naidoo Y; Nkhensani Mtleni; Pillay S; Ramphal U; Ramphal Y; San JE; Tegally H; Tshiabula D; Wilkinson E; de Oliveira T; van Wyk S                                                                                                                                                                                                                                                                                                                                                                                                                                                                                                                                                                                                                               |
| EPI_ISL_9149784, EPI_ISL_9149785, EPI_ISL_9149786, EPI_ISL_9149792, EPI_ISL_9149806, EPI_ISL_9149811, EPI_ISL_9149812, EPI_ISL_9149817, EPI_ISL_9149818, EPI_ISL_9149819, EPI_ISL_9149821, EPI_ISL_9149823                                                                                                                                                                                                                                                                                                                                                                                                                                                                                                                                                                                                                                                                                                                                                                                                                                                                                                                                                                                                                                                                                                                                                                                                                                                                                                                                                                              | see above                                                                                          | National Health Laboratory Services, Virology                                                                                                                                             | National Health Laboratory Services, Virology<br>Avani Bharuthram; Florette K. Treurnicht; Kathleen Subramoney; Nkhensani Mtleni                                                                                                                                                                                                                                                                                                                                                                                                                                                                                                                                                                                                                                                                                                                                                                                                                                                                 |
| EPI_ISL_9285814, EPI_ISL_9460494, EPI_ISL_9460516, EPI_ISL_9460517, EPI_ISL_9460520, EPI_ISL_9460531, EPI_ISL_9460534, EPI_ISL_9460538, EPI_ISL_9460544, EPI_ISL_9460547, EPI_ISL_9615181, EPI_ISL_9615182                                                                                                                                                                                                                                                                                                                                                                                                                                                                                                                                                                                                                                                                                                                                                                                                                                                                                                                                                                                                                                                                                                                                                                                                                                                                                                                                                                              | see above                                                                                          | National Institute of Health Research & Development (Balitbangkes)                                                                                                                        | West Java Health Laboratory; School of Life Sciences and Technology, Institut Teknologi Bandung; National Institute of Health Research & Development<br>Azzania Fibrani; Cut Nur Cinthia Alamanda; Ema Rahmawati; Gusti Ayu Prani Pradani; Hana Apsari Pawestri; Karimatu Khoirunnisa; Miftahul Faridi; Putri Cahya Destiani; Rebecca Stephanie; Rifky Waluyajati Rachman; Rini Robiani; Ryan Bayusantika Ristandi; Subangkit; Vivi Setiawaty                                                                                                                                                                                                                                                                                                                                                                                                                                                                                                                                                    |
| EPI_ISL_9242292, EPI_ISL_9242293                                                                                                                                                                                                                                                                                                                                                                                                                                                                                                                                                                                                                                                                                                                                                                                                                                                                                                                                                                                                                                                                                                                                                                                                                                                                                                                                                                                                                                                                                                                                                        | National Institute of Health Research and Development                                              | Institute of Tropical Disease, Universitas Airlangga                                                                                                                                      | Aldise M Nastro; Erwin Ashta Triyono; Gatoe Sioedjardi; Hana A Pawestri; Jezzy R Dewantari; Joni Wahyuhadi; Kazufumi Shimizu; Krisnodo Rahardjo; Laksmi Wulandari; Maria I Lusida; Resti Yudhawati; Rima R Prasetya; Soetjingto; Vivi Setiawaty; Yasuko Mori                                                                                                                                                                                                                                                                                                                                                                                                                                                                                                                                                                                                                                                                                                                                     |
| EPI_ISL_9551486                                                                                                                                                                                                                                                                                                                                                                                                                                                                                                                                                                                                                                                                                                                                                                                                                                                                                                                                                                                                                                                                                                                                                                                                                                                                                                                                                                                                                                                                                                                                                                         | National Institute of Health Research and Development                                              | National Quality Control Laboratory of Drug and Food                                                                                                                                      | Diana Tri Wulan; Hana Apsari Pawestri; Sri Utamingsih; Vivi Setiawaty                                                                                                                                                                                                                                                                                                                                                                                                                                                                                                                                                                                                                                                                                                                                                                                                                                                                                                                            |
| EPI_ISL_9144313                                                                                                                                                                                                                                                                                                                                                                                                                                                                                                                                                                                                                                                                                                                                                                                                                                                                                                                                                                                                                                                                                                                                                                                                                                                                                                                                                                                                                                                                                                                                                                         | National Institute of Public Health                                                                | National Institute of Public Health                                                                                                                                                       | Alexander Nagy; Helena Jirincova; Jan Moskalyk; Jaromira Vecerova; Timotej Suri                                                                                                                                                                                                                                                                                                                                                                                                                                                                                                                                                                                                                                                                                                                                                                                                                                                                                                                  |
| EPI_ISL_9463941                                                                                                                                                                                                                                                                                                                                                                                                                                                                                                                                                                                                                                                                                                                                                                                                                                                                                                                                                                                                                                                                                                                                                                                                                                                                                                                                                                                                                                                                                                                                                                         | National Laboratory for Health, Environment and Food, OMM, Celje                                   | Department for Public Health Microbiology Ljubljana, National Laboratory for Health, Environment and Food                                                                                 | Aleksander Kocuvan; Aleksander Mahnic; Alenka Štorman; Daša Kavka; Kaja Tominc; Maja Rupnik; Martin Bosilj; Mateja Borinc; Maša Jarcič; Nika Gobec; Sandra Janezic; Tjaša Žohar Čretnik; Tom Koritnik                                                                                                                                                                                                                                                                                                                                                                                                                                                                                                                                                                                                                                                                                                                                                                                            |
| EPI_ISL_8562554, EPI_ISL_8562558, EPI_ISL_8562560, EPI_ISL_8562561, EPI_ISL_8562562, EPI_ISL_8562564, EPI_ISL_8562566, EPI_ISL_8562568, EPI_ISL_8562569, EPI_ISL_8562593, EPI_ISL_8562594, EPI_ISL_8562638, EPI_ISL_8562640, EPI_ISL_8562661, EPI_ISL_8562665, EPI_ISL_8566891, EPI_ISL_8703863, EPI_ISL_8703864, EPI_ISL_8703865, EPI_ISL_8703866, EPI_ISL_8703867, EPI_ISL_8703868, EPI_ISL_8703869, EPI_ISL_8703870, EPI_ISL_8703871, EPI_ISL_8703872, EPI_ISL_8703873, EPI_ISL_8703874, EPI_ISL_8703875, EPI_ISL_8703876, EPI_ISL_8703877, EPI_ISL_8703878, EPI_ISL_8703879, EPI_ISL_8703880, EPI_ISL_8703881, EPI_ISL_8703882, EPI_ISL_8703883, EPI_ISL_8703884, EPI_ISL_8703885, EPI_ISL_8703886, EPI_ISL_8703887, EPI_ISL_8703888, EPI_ISL_8703889, EPI_ISL_8703890, EPI_ISL_8703891, EPI_ISL_8703892, EPI_ISL_8703893, EPI_ISL_8703894, EPI_ISL_8703895, EPI_ISL_8703896, EPI_ISL_8703897, EPI_ISL_8703898, EPI_ISL_8703899, EPI_ISL_8703900, EPI_ISL_8703901, EPI_ISL_8703902, EPI_ISL_8703903, EPI_ISL_8703904, EPI_ISL_8703905, EPI_ISL_8703906, EPI_ISL_8703907, EPI_ISL_8703908, EPI_ISL_8703909, EPI_ISL_8704885, EPI_ISL_8704886, EPI_ISL_8704887, EPI_ISL_8704888, EPI_ISL_8704889, EPI_ISL_8704890, EPI_ISL_8704891, EPI_ISL_8704892, EPI_ISL_8704893, EPI_ISL_8704894, EPI_ISL_8704895, EPI_ISL_8704896, EPI_ISL_8704897, EPI_ISL_8704898, EPI_ISL_870499, EPI_ISL_8704999, EPI_ISL_8705000, EPI_ISL_8705001, EPI_ISL_8705002, EPI_ISL_8705003, EPI_ISL_8705012, EPI_ISL_8705014, EPI_ISL_8705017, EPI_ISL_8705023, EPI_ISL_8705024, EPI_ISL_8705025, EPI_ISL_8705026 | see above                                                                                          | National Public Health Laboratory, National Centre for Infectious Diseases                                                                                                                | National Public Health Laboratory, National Centre for Infectious Diseases<br>Benny Yeo; Grace Ngan; Lin Cui; Raymond Tzer Pin Lin; Royce Ang; Samuel Loo; Zhenyang Zhou                                                                                                                                                                                                                                                                                                                                                                                                                                                                                                                                                                                                                                                                                                                                                                                                                         |
| EPI_ISL_9412992, EPI_ISL_9412994, EPI_ISL_9412999, EPI_ISL_9437496, EPI_ISL_9437497, EPI_ISL_9437500, EPI_ISL_9437501, EPI_ISL_9437502, EPI_ISL_9437503, EPI_ISL_9437504, EPI_ISL_9437505, EPI_ISL_9437506, EPI_ISL_9437507, EPI_ISL_9437508, EPI_ISL_9437509, EPI_ISL_9437512, EPI_ISL_9437513, EPI_ISL_9437527, EPI_ISL_9731826, EPI_ISL_9731827, EPI_ISL_9731830, EPI_ISL_9731831, EPI_ISL_9731832, EPI_ISL_9731833, EPI_ISL_9731836, EPI_ISL_9731837, EPI_ISL_9731838, EPI_ISL_9731839, EPI_ISL_9731840, EPI_ISL_9731841, EPI_ISL_9731842, EPI_ISL_9731843, EPI_ISL_9731844, EPI_ISL_9731845, EPI_ISL_9731846, EPI_ISL_9731847, EPI_ISL_9731848, EPI_ISL_9731849, EPI_ISL_9731850, EPI_ISL_9731851, EPI_ISL_9731852, EPI_ISL_9731856, EPI_ISL_9731857, EPI_ISL_9731858                                                                                                                                                                                                                                                                                                                                                                                                                                                                                                                                                                                                                                                                                                                                                                                                              |                                                                                                    |                                                                                                                                                                                           |                                                                                                                                                                                                                                                                                                                                                                                                                                                                                                                                                                                                                                                                                                                                                                                                                                                                                                                                                                                                  |

|                                                                                                                                                                                                                                                                                                                                                                                                                                                                                                                                                                                                                                                                                                                                                                                                                                                                                                                                                                                                                                           |                                                                                                                                                                                                                     |                                                                                        |                                                                                                                                                                                                                                                                                                                                                                                                                                                                                                                                                                                                                                                                                                                                                                                                                                                                                                                                                                                               |  |  |  |  |  |                                                                                                                                                                                                                                                                                                                                                                                                                                                                                                                                                                                                                                                                                                                                                                                                                                                                                                                                                                                               |  |
|-------------------------------------------------------------------------------------------------------------------------------------------------------------------------------------------------------------------------------------------------------------------------------------------------------------------------------------------------------------------------------------------------------------------------------------------------------------------------------------------------------------------------------------------------------------------------------------------------------------------------------------------------------------------------------------------------------------------------------------------------------------------------------------------------------------------------------------------------------------------------------------------------------------------------------------------------------------------------------------------------------------------------------------------|---------------------------------------------------------------------------------------------------------------------------------------------------------------------------------------------------------------------|----------------------------------------------------------------------------------------|-----------------------------------------------------------------------------------------------------------------------------------------------------------------------------------------------------------------------------------------------------------------------------------------------------------------------------------------------------------------------------------------------------------------------------------------------------------------------------------------------------------------------------------------------------------------------------------------------------------------------------------------------------------------------------------------------------------------------------------------------------------------------------------------------------------------------------------------------------------------------------------------------------------------------------------------------------------------------------------------------|--|--|--|--|--|-----------------------------------------------------------------------------------------------------------------------------------------------------------------------------------------------------------------------------------------------------------------------------------------------------------------------------------------------------------------------------------------------------------------------------------------------------------------------------------------------------------------------------------------------------------------------------------------------------------------------------------------------------------------------------------------------------------------------------------------------------------------------------------------------------------------------------------------------------------------------------------------------------------------------------------------------------------------------------------------------|--|
| EPI_ISL_9731859, EPI_ISL_9731860, EPI_ISL_9731861, EPI_ISL_9731866, EPI_ISL_9731866, EPI_ISL_9731930, EPI_ISL_9731931, EPI_ISL_9731932, EPI_ISL_9731930, EPI_ISL_9731931, EPI_ISL_9731932, EPI_ISL_9731933, EPI_ISL_9731934, EPI_ISL_9731935, EPI_ISL_9731936, EPI_ISL_9731937, EPI_ISL_9731938, EPI_ISL_9731940, EPI_ISL_9731941, EPI_ISL_9731942, EPI_ISL_9731943, EPI_ISL_9731944, EPI_ISL_9731945, EPI_ISL_9731946, EPI_ISL_9731947, EPI_ISL_9731948, EPI_ISL_9731949, EPI_ISL_9731950, EPI_ISL_9731951, EPI_ISL_9731952, EPI_ISL_9731953, EPI_ISL_9731954, EPI_ISL_9731955, EPI_ISL_9731960, EPI_ISL_9731963, EPI_ISL_9731965, EPI_ISL_9731966, EPI_ISL_9731976, EPI_ISL_9731979                                                                                                                                                                                                                                                                                                                                                     |                                                                                                                                                                                                                     |                                                                                        |                                                                                                                                                                                                                                                                                                                                                                                                                                                                                                                                                                                                                                                                                                                                                                                                                                                                                                                                                                                               |  |  |  |  |  |                                                                                                                                                                                                                                                                                                                                                                                                                                                                                                                                                                                                                                                                                                                                                                                                                                                                                                                                                                                               |  |
| see above                                                                                                                                                                                                                                                                                                                                                                                                                                                                                                                                                                                                                                                                                                                                                                                                                                                                                                                                                                                                                                 | National Virology Reference Laboratory                                                                                                                                                                              | Microbial Genomic Services                                                             |                                                                                                                                                                                                                                                                                                                                                                                                                                                                                                                                                                                                                                                                                                                                                                                                                                                                                                                                                                                               |  |  |  |  |  | Haziq Momin; Nor Azian Hafnee; Zainun Zaini                                                                                                                                                                                                                                                                                                                                                                                                                                                                                                                                                                                                                                                                                                                                                                                                                                                                                                                                                   |  |
| EPI_ISL_9125282                                                                                                                                                                                                                                                                                                                                                                                                                                                                                                                                                                                                                                                                                                                                                                                                                                                                                                                                                                                                                           | National Virus Reference Laboratory                                                                                                                                                                                 | National Virus Reference Laboratory                                                    |                                                                                                                                                                                                                                                                                                                                                                                                                                                                                                                                                                                                                                                                                                                                                                                                                                                                                                                                                                                               |  |  |  |  |  | Charlene Bennett; Cillian F De Gascun; Gabriel Gonzalez; Jonathan Dean; Michael Carr; Zoe Yandle                                                                                                                                                                                                                                                                                                                                                                                                                                                                                                                                                                                                                                                                                                                                                                                                                                                                                              |  |
| EPI_ISL_9342988, EPI_ISL_9343018                                                                                                                                                                                                                                                                                                                                                                                                                                                                                                                                                                                                                                                                                                                                                                                                                                                                                                                                                                                                          | Nemocnice Havlickov Brod                                                                                                                                                                                            | University Hospital Brno, CMBG                                                         |                                                                                                                                                                                                                                                                                                                                                                                                                                                                                                                                                                                                                                                                                                                                                                                                                                                                                                                                                                                               |  |  |  |  |  | Bezdicek Matej; Dolejska Monika; Kristyna Dufkova; Lengerova Martina; Svaton Jan                                                                                                                                                                                                                                                                                                                                                                                                                                                                                                                                                                                                                                                                                                                                                                                                                                                                                                              |  |
| EPI_ISL_8885415, EPI_ISL_9236199, EPI_ISL_9236228, EPI_ISL_9236270                                                                                                                                                                                                                                                                                                                                                                                                                                                                                                                                                                                                                                                                                                                                                                                                                                                                                                                                                                        | Nidan Path Lab, Gandhinagar                                                                                                                                                                                         | Gujarat Biotechnology Research Centre                                                  |                                                                                                                                                                                                                                                                                                                                                                                                                                                                                                                                                                                                                                                                                                                                                                                                                                                                                                                                                                                               |  |  |  |  |  | Akhilesh Modi; Apurvasinh Puvar; Bhadreshsinh Gohil; Chaitanya Joshi; Disha Vora; Himani Patel; Janvi Raval; Jaykumar Rangani; Madhvi Joshi; Nimesh Patel; Nitin Savaliya; NitinShukla; Priyank Chavda; Ramesh Pandit; Roshani Mishra; Sonal Sharma; Tasnim Trivedi; Zarna Patel                                                                                                                                                                                                                                                                                                                                                                                                                                                                                                                                                                                                                                                                                                              |  |
| EPI_ISL_8494312, EPI_ISL_8494313                                                                                                                                                                                                                                                                                                                                                                                                                                                                                                                                                                                                                                                                                                                                                                                                                                                                                                                                                                                                          | Nootan Medical College, Visnagar, Mehnsa                                                                                                                                                                            | Gujarat Biotechnology Research Centre                                                  |                                                                                                                                                                                                                                                                                                                                                                                                                                                                                                                                                                                                                                                                                                                                                                                                                                                                                                                                                                                               |  |  |  |  |  | Akhilesh Modi; Apurvasinh Puvar; Bhadreshsinh Gohil; Chaitanya Joshi; Disha Vora; Janvi Raval; Jaykumar Rangani; Madhvi Joshi; Nimesh Patel; Nitin Savaliya; Nitin Shukla; Priyank Chavda; Ramesh Pandit; Roshani Mishra; Sonal Sharma; Tasnim Trivedi; UrveshMistry; Zarna Patel                                                                                                                                                                                                                                                                                                                                                                                                                                                                                                                                                                                                                                                                                                             |  |
| EPI_ISL_8880077, EPI_ISL_8880078                                                                                                                                                                                                                                                                                                                                                                                                                                                                                                                                                                                                                                                                                                                                                                                                                                                                                                                                                                                                          | North Lantau Hospital                                                                                                                                                                                               | Hong Kong Department of Health                                                         |                                                                                                                                                                                                                                                                                                                                                                                                                                                                                                                                                                                                                                                                                                                                                                                                                                                                                                                                                                                               |  |  |  |  |  | Alan K. L. Tsang; Edman T.K. Lam; Ken H.L. Ng; Patricia K. L. Leung; Peter C.W. Yip; Rickjason C.W. Chan                                                                                                                                                                                                                                                                                                                                                                                                                                                                                                                                                                                                                                                                                                                                                                                                                                                                                      |  |
| EPI_ISL_8885512, EPI_ISL_8930365, EPI_ISL_9234048, EPI_ISL_9604369, EPI_ISL_9604370                                                                                                                                                                                                                                                                                                                                                                                                                                                                                                                                                                                                                                                                                                                                                                                                                                                                                                                                                       | Northstar Pathology Laboratory, Ahmedabad                                                                                                                                                                           | Gujarat Biotechnology Research Centre                                                  |                                                                                                                                                                                                                                                                                                                                                                                                                                                                                                                                                                                                                                                                                                                                                                                                                                                                                                                                                                                               |  |  |  |  |  | Akhilesh Modi; Apurvasinh Puvar; Bhadreshsinh Gohil; Chaitanya Joshi; Dhaval; Disha Vora; Janvi Raval; Jaykumar Rangani; Kanupriya; Madhvi Joshi; Nimesh Patel; Nitin Savaliya; Nitin Shukla; NitinShukla; Priyank Chavda; Ramesh Pandit; Roshani Mishra; Sonal Sharma; Tasnim Trivedi; Zarna Patel                                                                                                                                                                                                                                                                                                                                                                                                                                                                                                                                                                                                                                                                                           |  |
| EPI_ISL_9118828, EPI_ISL_9118963, EPI_ISL_9119072, EPI_ISL_9227446, EPI_ISL_9265322, EPI_ISL_9266528, EPI_ISL_9354170, EPI_ISL_9354385, EPI_ISL_9554809, EPI_ISL_9555759, EPI_ISL_9555778, EPI_ISL_9555892, EPI_ISL_9556132                                                                                                                                                                                                                                                                                                                                                                                                                                                                                                                                                                                                                                                                                                                                                                                                               |                                                                                                                                                                                                                     |                                                                                        |                                                                                                                                                                                                                                                                                                                                                                                                                                                                                                                                                                                                                                                                                                                                                                                                                                                                                                                                                                                               |  |  |  |  |  |                                                                                                                                                                                                                                                                                                                                                                                                                                                                                                                                                                                                                                                                                                                                                                                                                                                                                                                                                                                               |  |
| see above                                                                                                                                                                                                                                                                                                                                                                                                                                                                                                                                                                                                                                                                                                                                                                                                                                                                                                                                                                                                                                 | Northumbria University / South Tees Hospitals NHS Foundation Trust / North Cumbria Integrated Care NHS Foundation Trust / North Tees and Hartlepool NHS Foundation Trust / Newcastle Hospitals NHS Foundation Trust | COVID-19 Genomics UK (COG-UK) Consortium                                               | Andrew Nelson; Brendan Payne; Clive Graham; Darren L Smith; Debra Padgett; Edward Barton; Emma Swindells; Garren Scott; Gary Black; Gary Ettringham; Giles S Holt; Greg R Young; Jane Greenaway; Jennifer Collins; John Allan; Joshua Loh; Lynn Dover; Matthew Bashton; Mohammad A Tariq; Paul Baker; Sarah Essex; Steve Liggett; Wen C Yew; Yusri Taha                                                                                                                                                                                                                                                                                                                                                                                                                                                                                                                                                                                                                                       |  |  |  |  |  |                                                                                                                                                                                                                                                                                                                                                                                                                                                                                                                                                                                                                                                                                                                                                                                                                                                                                                                                                                                               |  |
| EPI_ISL_8935260                                                                                                                                                                                                                                                                                                                                                                                                                                                                                                                                                                                                                                                                                                                                                                                                                                                                                                                                                                                                                           | Orange County Public Health Laboratory                                                                                                                                                                              | Orange County Public Health Laboratory                                                 |                                                                                                                                                                                                                                                                                                                                                                                                                                                                                                                                                                                                                                                                                                                                                                                                                                                                                                                                                                                               |  |  |  |  |  | Angelica Torres; Julia Wolfe                                                                                                                                                                                                                                                                                                                                                                                                                                                                                                                                                                                                                                                                                                                                                                                                                                                                                                                                                                  |  |
| EPI_ISL_8665040                                                                                                                                                                                                                                                                                                                                                                                                                                                                                                                                                                                                                                                                                                                                                                                                                                                                                                                                                                                                                           | Orebro University Hospital, Dept Laboratory Medicine, Clinical Microbiology                                                                                                                                         | Orebro University Hospital                                                             |                                                                                                                                                                                                                                                                                                                                                                                                                                                                                                                                                                                                                                                                                                                                                                                                                                                                                                                                                                                               |  |  |  |  |  | Sundqvist M et al                                                                                                                                                                                                                                                                                                                                                                                                                                                                                                                                                                                                                                                                                                                                                                                                                                                                                                                                                                             |  |
| EPI_ISL_8923068                                                                                                                                                                                                                                                                                                                                                                                                                                                                                                                                                                                                                                                                                                                                                                                                                                                                                                                                                                                                                           | Oregon State Public Health Laboratory                                                                                                                                                                               | Oregon State Public Health Laboratory                                                  |                                                                                                                                                                                                                                                                                                                                                                                                                                                                                                                                                                                                                                                                                                                                                                                                                                                                                                                                                                                               |  |  |  |  |  | Eugene Yeboah; John Fontana and Shane Sevey; Laura Tsaknaridis; Rafia Razaq; Vanda Makris                                                                                                                                                                                                                                                                                                                                                                                                                                                                                                                                                                                                                                                                                                                                                                                                                                                                                                     |  |
| EPI_ISL_9023703, EPI_ISL_9023853, EPI_ISL_9162366, EPI_ISL_9164440, EPI_ISL_9164441, EPI_ISL_9235957, EPI_ISL_9235992, EPI_ISL_9238200, EPI_ISL_9240632, EPI_ISL_9496493                                                                                                                                                                                                                                                                                                                                                                                                                                                                                                                                                                                                                                                                                                                                                                                                                                                                  |                                                                                                                                                                                                                     |                                                                                        |                                                                                                                                                                                                                                                                                                                                                                                                                                                                                                                                                                                                                                                                                                                                                                                                                                                                                                                                                                                               |  |  |  |  |  |                                                                                                                                                                                                                                                                                                                                                                                                                                                                                                                                                                                                                                                                                                                                                                                                                                                                                                                                                                                               |  |
| see above                                                                                                                                                                                                                                                                                                                                                                                                                                                                                                                                                                                                                                                                                                                                                                                                                                                                                                                                                                                                                                 | Originating lab: Wales Specialist Virology Centre Sequencing lab: Pathogen Genomics Unit                                                                                                                            | Public Health Wales Microbiology Cardiff Wales Specialist Virology Centre              | Alec Birchley; Alexander Adams; Amy Gaskin; Angela Marchbank; Bree Gatica-Wilcox; Catherine Moore; Jason Coombes; Joanne Watkins; Joel Southgate; Johnathan Evans; Laura Gifford; Lauren Gilbert; Lee Graham; Malorie Perry; Matthew Bull; Nicole Pacchiarini; Sally Corden; Sara Kumziene-Summerhayes; Sara Rey; Sarah Taylor; Simon Cottrell; Sophie Jones; Tom Connor                                                                                                                                                                                                                                                                                                                                                                                                                                                                                                                                                                                                                      |  |  |  |  |  |                                                                                                                                                                                                                                                                                                                                                                                                                                                                                                                                                                                                                                                                                                                                                                                                                                                                                                                                                                                               |  |
| EPI_ISL_8928326, EPI_ISL_8928388, EPI_ISL_9747980, EPI_ISL_9747981, EPI_ISL_9747982, EPI_ISL_9747983, EPI_ISL_9747984, EPI_ISL_9747985, EPI_ISL_9747986, EPI_ISL_9747987, EPI_ISL_9747988, EPI_ISL_9747989, EPI_ISL_9747990, EPI_ISL_9747991                                                                                                                                                                                                                                                                                                                                                                                                                                                                                                                                                                                                                                                                                                                                                                                              |                                                                                                                                                                                                                     |                                                                                        |                                                                                                                                                                                                                                                                                                                                                                                                                                                                                                                                                                                                                                                                                                                                                                                                                                                                                                                                                                                               |  |  |  |  |  |                                                                                                                                                                                                                                                                                                                                                                                                                                                                                                                                                                                                                                                                                                                                                                                                                                                                                                                                                                                               |  |
| see above                                                                                                                                                                                                                                                                                                                                                                                                                                                                                                                                                                                                                                                                                                                                                                                                                                                                                                                                                                                                                                 | Oslo University Hospital, Department of Microbiology                                                                                                                                                                | Norwegian Institute of Public Health, Department of Virology                           | Arvind Yegambaram Meenakshi Sundaram; Cathrine Fladeby; Garcia Llorente Ignacio; Gregor D. Gillfillan; Hilde Elshaug; Hilde Volla; Jon Bråte; Kamilla Heddeland Instefjord; Karoline Bragstad; Kathrine Stene-Johansen; Line Victoria Moen; Lise Andresen; Mariann Nilsen; Mona Holberg-Petersen; Olav Hungnes; Pedersen Benedikte Nevjen; Pål Marius Bjørnstad; Rasmus Riis Kopperud; Teodora Plamenova Ribarska                                                                                                                                                                                                                                                                                                                                                                                                                                                                                                                                                                             |  |  |  |  |  |                                                                                                                                                                                                                                                                                                                                                                                                                                                                                                                                                                                                                                                                                                                                                                                                                                                                                                                                                                                               |  |
| EPI_ISL_9779404, EPI_ISL_9779405, EPI_ISL_9779406, EPI_ISL_9779407, EPI_ISL_9779408, EPI_ISL_9779409                                                                                                                                                                                                                                                                                                                                                                                                                                                                                                                                                                                                                                                                                                                                                                                                                                                                                                                                      | Osmania Medical College                                                                                                                                                                                             | Centre for DNA Fingerprinting and Diagnostics                                          |                                                                                                                                                                                                                                                                                                                                                                                                                                                                                                                                                                                                                                                                                                                                                                                                                                                                                                                                                                                               |  |  |  |  |  | Arunkumar Karunanidhi; Ashwin Dalal; Asmita Gupta; Divya Vashishta; Murali Bhashyam; Nagamani Kammilli; Rupin Shelake; Vinay Donipadi                                                                                                                                                                                                                                                                                                                                                                                                                                                                                                                                                                                                                                                                                                                                                                                                                                                         |  |
| EPI_ISL_9323330, EPI_ISL_9323331, EPI_ISL_9323332                                                                                                                                                                                                                                                                                                                                                                                                                                                                                                                                                                                                                                                                                                                                                                                                                                                                                                                                                                                         | Ospa Farmer's Medical Center                                                                                                                                                                                        | Philippine Genome Center                                                               | Alethea R. de Guzman; Alyssa Joyce E. Telles; Angelica A. Garcia; Anna Ong-Lim; Benedict A. Maralit; Carlo M. Lapid; Celia Carlos; Cynthia P. Saloma; Devon Ray Pacial; Diomedes A. Cariño; Edsel Maurice Salvana; El King D. Morado; Elcid Aaron R. Pangilinan; Eva Maria Cutiongco-de la Paz; Francis A. Tablizo; Henrietta Marie Rodriguez; Jaime C. Montoya; Jan Michael C. Yap; Jarvin E. Nipales; Jo-Hannah S. Llames; John Michael Egan; John Q. Wong; Johnny A. Ong; Joshua Gregor A. Dizon; Joshua Jose Endozo; Karol Sophia Agape R. Padilla; Kris P. Punayan; Kristina Patriz Dela Cruz; Lindsay Clare D.L. Carandang; Ma. Exanii Plantig; Marc Edsel C. Ayes; Maria Rosario Singh-Vergeire; Maria Sofia L. Yangzon; Marielle M. Gamboa; Marissa Alejandra; Niña Francesca Bustamante; Razel Nikka M. Hao; Renato Jacinto Q. Mantaring; Rianna Patricia S. Cruz; Razel A. Medina; Shiela Mae M. Araiza; Yvonne Valerie Austria; Zipporah Mariebelle R. Enriquez; Zyrel V. Mollejon |  |  |  |  |  |                                                                                                                                                                                                                                                                                                                                                                                                                                                                                                                                                                                                                                                                                                                                                                                                                                                                                                                                                                                               |  |
| EPI_ISL_9322862, EPI_ISL_9322863, EPI_ISL_9322864, EPI_ISL_9322865, EPI_ISL_9322866, EPI_ISL_9322867, EPI_ISL_9322869, EPI_ISL_9322870, EPI_ISL_9322871, EPI_ISL_9322872                                                                                                                                                                                                                                                                                                                                                                                                                                                                                                                                                                                                                                                                                                                                                                                                                                                                  |                                                                                                                                                                                                                     |                                                                                        |                                                                                                                                                                                                                                                                                                                                                                                                                                                                                                                                                                                                                                                                                                                                                                                                                                                                                                                                                                                               |  |  |  |  |  |                                                                                                                                                                                                                                                                                                                                                                                                                                                                                                                                                                                                                                                                                                                                                                                                                                                                                                                                                                                               |  |
| see above                                                                                                                                                                                                                                                                                                                                                                                                                                                                                                                                                                                                                                                                                                                                                                                                                                                                                                                                                                                                                                 | Osipal Ng Parañaque District II                                                                                                                                                                                     | Philippine Genome Center                                                               | Alethea R. de Guzman; Alyssa Joyce E. Telles; Angelica A. Garcia; Anna Ong-Lim; Benedict A. Maralit; Carlo M. Lapid; Celia Carlos; Cynthia P. Saloma; Devon Ray Pacial; Diomedes A. Cariño; Edsel Maurice Salvana; El King D. Morado; Elcid Aaron R. Pangilinan; Eva Maria Cutiongco-de la Paz; Francis A. Tablizo; Henrietta Marie Rodriguez; Jaime C. Montoya; Jan Michael C. Yap; Jarvin E. Nipales; Jo-Hannah S. Llames; John Michael Egan; John Q. Wong; Johnny A. Ong; Joshua Gregor A. Dizon; Joshua Jose Endozo; Karol Sophia Agape R. Padilla; Kris P. Punayan; Kristina Patriz Dela Cruz; Lindsay Clare D.L. Carandang; Ma. Exanii Plantig; Marc Edsel C. Ayes; Maria Rosario Singh-Vergeire; Maria Sofia L. Yangzon; Marielle M. Gamboa; Marissa Alejandra; Niña Francesca Bustamante; Razel Nikka M. Hao; Renato Jacinto Q. Mantaring; Rianna Patricia S. Cruz; Razel A. Medina; Shiela Mae M. Araiza; Yvonne Valerie Austria; Zipporah Mariebelle R. Enriquez; Zyrel V. Mollejon |  |  |  |  |  |                                                                                                                                                                                                                                                                                                                                                                                                                                                                                                                                                                                                                                                                                                                                                                                                                                                                                                                                                                                               |  |
| EPI_ISL_9227204, EPI_ISL_9227213, EPI_ISL_9460781, EPI_ISL_9460782, EPI_ISL_9460785, EPI_ISL_9460789, EPI_ISL_9460790, EPI_ISL_9460791, EPI_ISL_9460795, EPI_ISL_9460796, EPI_ISL_9460797, EPI_ISL_9460798, EPI_ISL_9460801, EPI_ISL_9461115, EPI_ISL_9461116, EPI_ISL_9461117, EPI_ISL_9461119, EPI_ISL_9480345, EPI_ISL_9480425, EPI_ISL_9480686, EPI_ISL_9480689, EPI_ISL_9480690, EPI_ISL_9480691, EPI_ISL_9626055, EPI_ISL_9626056, EPI_ISL_9626057, EPI_ISL_9626058, EPI_ISL_9626059, EPI_ISL_9626060                                                                                                                                                                                                                                                                                                                                                                                                                                                                                                                               |                                                                                                                                                                                                                     |                                                                                        |                                                                                                                                                                                                                                                                                                                                                                                                                                                                                                                                                                                                                                                                                                                                                                                                                                                                                                                                                                                               |  |  |  |  |  |                                                                                                                                                                                                                                                                                                                                                                                                                                                                                                                                                                                                                                                                                                                                                                                                                                                                                                                                                                                               |  |
| see above                                                                                                                                                                                                                                                                                                                                                                                                                                                                                                                                                                                                                                                                                                                                                                                                                                                                                                                                                                                                                                 | Ostfold Hospital Trust - Kalnes, Centre for Laboratory Medicine, Section for gene technology and infection serology                                                                                                 | Norwegian Institute of Public Health, Department of Virology                           | Atiya R Ali; Debec Nadia; Engebretsen Serina Beate; Garcia Llorente Ignacio; Hilde Elshaug; Hilde Nordby Falkenhaus; Hilde Volla; Jon Bråte; Kamilla Heddeland Instefjord; Karoline Bragstad; Kathrine Stene-Johansen; Line Victoria Moen; Marie Riis Kopperud; Nevsjen; Rasmus Riis Kopperud                                                                                                                                                                                                                                                                                                                                                                                                                                                                                                                                                                                                                                                                                                 |  |  |  |  |  |                                                                                                                                                                                                                                                                                                                                                                                                                                                                                                                                                                                                                                                                                                                                                                                                                                                                                                                                                                                               |  |
| EPI_ISL_8859929                                                                                                                                                                                                                                                                                                                                                                                                                                                                                                                                                                                                                                                                                                                                                                                                                                                                                                                                                                                                                           | PHC, Titabor, Jorhat                                                                                                                                                                                                | Centre for Infectious Diseases, CSIR-NEIST                                             |                                                                                                                                                                                                                                                                                                                                                                                                                                                                                                                                                                                                                                                                                                                                                                                                                                                                                                                                                                                               |  |  |  |  |  | G Narahari Sastry; Gayatri Gogoi; Jatin Kalita; Moirangthem G Singh; Munmi Bora; Pankaj Bhalari; Prasenjit Mannan; Romi Wahengbam; Tridip Phukan; Yasmin B Tapadar                                                                                                                                                                                                                                                                                                                                                                                                                                                                                                                                                                                                                                                                                                                                                                                                                            |  |
| EPI_ISL_9201566, EPI_ISL_9201568, EPI_ISL_9402197                                                                                                                                                                                                                                                                                                                                                                                                                                                                                                                                                                                                                                                                                                                                                                                                                                                                                                                                                                                         | POLOKWANE LABORATORY                                                                                                                                                                                                | National Institute for Communicable Diseases of the National Health Laboratory Service |                                                                                                                                                                                                                                                                                                                                                                                                                                                                                                                                                                                                                                                                                                                                                                                                                                                                                                                                                                                               |  |  |  |  |  | Amoako DG; Bhiman JN; Everatt J; Ismail A; Kekana D; Mahlangu B; Mnguni A; Mohale T; Ntuli N; Scheepers C; Wolter N                                                                                                                                                                                                                                                                                                                                                                                                                                                                                                                                                                                                                                                                                                                                                                                                                                                                           |  |
| EPI_ISL_9388269, EPI_ISL_9388273, EPI_ISL_9388281                                                                                                                                                                                                                                                                                                                                                                                                                                                                                                                                                                                                                                                                                                                                                                                                                                                                                                                                                                                         | PHL Lumini                                                                                                                                                                                                          | National Public Health Laboratory                                                      |                                                                                                                                                                                                                                                                                                                                                                                                                                                                                                                                                                                                                                                                                                                                                                                                                                                                                                                                                                                               |  |  |  |  |  | National Public Health Laboratory Team                                                                                                                                                                                                                                                                                                                                                                                                                                                                                                                                                                                                                                                                                                                                                                                                                                                                                                                                                        |  |
| EPI_ISL_8608177, EPI_ISL_8826526, EPI_ISL_8826530                                                                                                                                                                                                                                                                                                                                                                                                                                                                                                                                                                                                                                                                                                                                                                                                                                                                                                                                                                                         | Palapye Primary Hospital Laboratory                                                                                                                                                                                 | Botswana Harvard HIV Reference Laboratory                                              |                                                                                                                                                                                                                                                                                                                                                                                                                                                                                                                                                                                                                                                                                                                                                                                                                                                                                                                                                                                               |  |  |  |  |  | Boitumelo J. L. Zuze; Boitumelo Zuze; Botshelo Radibe; Dorcas Maruapula; Joseph Makhema; Keoratlhe Ntshambiwa; Kgomoetso Moruisi; Legodile Koepeile; Letsibogo Gaoraalwe; Mosepele Mosepele; Mphaphi B. Mbulawa; Ontlametse T. Bareng; Pamela Smith-Lawrence; Roger Shapiro; Setetogi Ramaolaga; Shahin Lockman; Sikhullile Moyo; Simani Gaseitsiwe; Thela Tefelo; Thongbotho Mphayakgosi; Wonderfu T. Choga                                                                                                                                                                                                                                                                                                                                                                                                                                                                                                                                                                                  |  |
| EPI_ISL_8871167                                                                                                                                                                                                                                                                                                                                                                                                                                                                                                                                                                                                                                                                                                                                                                                                                                                                                                                                                                                                                           | Pandemic Response Lab - NYC                                                                                                                                                                                         | Pandemic Response Lab, R&D                                                             |                                                                                                                                                                                                                                                                                                                                                                                                                                                                                                                                                                                                                                                                                                                                                                                                                                                                                                                                                                                               |  |  |  |  |  | Alex Carpio; Cybill del Castillo; Dylan Law; Haiping Hao; Henry Lee; Isabel Fernandez Escapa; Jon Laurent; Melissa Hopkins; Michael Hammerling; Pradeep Bugga; Shinyoung Clair Kang; Sol Rey; William Ward                                                                                                                                                                                                                                                                                                                                                                                                                                                                                                                                                                                                                                                                                                                                                                                    |  |
| EPI_ISL_8885468, EPI_ISL_9023173, EPI_ISL_9234049                                                                                                                                                                                                                                                                                                                                                                                                                                                                                                                                                                                                                                                                                                                                                                                                                                                                                                                                                                                         | Pandit Dindayal Upadhyay Medical College, Rajkot                                                                                                                                                                    | Gujarat Biotechnology Research Centre                                                  |                                                                                                                                                                                                                                                                                                                                                                                                                                                                                                                                                                                                                                                                                                                                                                                                                                                                                                                                                                                               |  |  |  |  |  | Akhilesh Modi; Apurvasinh Puvar; Bhadreshsinh Gohil; Chaitanya Joshi; Disha Vora; Janvi Raval; Jaykumar Rangani; Kavathiya; Madhvi Joshi; Nimesh Patel; Nitin Savaliya; NitinShukla; Priyank Chavda; Ramesh Pandit; Roshani Mishra; Sonal Sharma; Tasnim Trivedi; Zarna Patel                                                                                                                                                                                                                                                                                                                                                                                                                                                                                                                                                                                                                                                                                                                 |  |
| EPI_ISL_9323358, EPI_ISL_9323359, EPI_ISL_9323360, EPI_ISL_9323361, EPI_ISL_9323362, EPI_ISL_9323363, EPI_ISL_9323364, EPI_ISL_9323365, EPI_ISL_9323366, EPI_ISL_9323367, EPI_ISL_9323368, EPI_ISL_9323369                                                                                                                                                                                                                                                                                                                                                                                                                                                                                                                                                                                                                                                                                                                                                                                                                                |                                                                                                                                                                                                                     |                                                                                        |                                                                                                                                                                                                                                                                                                                                                                                                                                                                                                                                                                                                                                                                                                                                                                                                                                                                                                                                                                                               |  |  |  |  |  |                                                                                                                                                                                                                                                                                                                                                                                                                                                                                                                                                                                                                                                                                                                                                                                                                                                                                                                                                                                               |  |
| see above                                                                                                                                                                                                                                                                                                                                                                                                                                                                                                                                                                                                                                                                                                                                                                                                                                                                                                                                                                                                                                 | Pangasinan Molecular Diagnostic Laboratory                                                                                                                                                                          | Philippine Genome Center                                                               | Alethea R. de Guzman; Alyssa Joyce E. Telles; Angelica A. Garcia; Anna Ong-Lim; Benedict A. Maralit; Carlo M. Lapid; Celia Carlos; Cynthia P. Saloma; Devon Ray Pacial; Diomedes A. Cariño; Edsel Maurice Salvana; El King D. Morado; Elcid Aaron R. Pangilinan; Eva Maria Cutiongco-de la Paz; Francis A. Tablizo; Henrietta Marie Rodriguez; Jaime C. Montoya; Jan Michael C. Yap; Jarvin E. Nipales; Jo-Hannah S. Llames; John Michael Egan; John Q. Wong; Johnny A. Ong; Joshua Gregor A. Dizon; Joshua Jose Endozo; Karol Sophia Agape R. Padilla; Kris P. Punayan; Kristina Patriz Dela Cruz; Lindsay Clare D.L. Carandang; Ma. Exanii Plantig; Marc Edsel C. Ayes; Maria Rosario Singh-Vergeire; Maria Sofia L. Yangzon; Marielle M. Gamboa; Marissa Alejandra; Niña Francesca Bustamante; Razel Nikka M. Hao; Renato Jacinto Q. Mantaring; Rianna Patricia S. Cruz; Razel A. Medina; Shiela Mae M. Araiza; Yvonne Valerie Austria; Zipporah Mariebelle R. Enriquez; Zyrel V. Mollejon |  |  |  |  |  |                                                                                                                                                                                                                                                                                                                                                                                                                                                                                                                                                                                                                                                                                                                                                                                                                                                                                                                                                                                               |  |
| EPI_ISL_8744094, EPI_ISL_8744096, EPI_ISL_8744097, EPI_ISL_8744098, EPI_ISL_9023236, EPI_ISL_9023240, EPI_ISL_9604283, EPI_ISL_9604285                                                                                                                                                                                                                                                                                                                                                                                                                                                                                                                                                                                                                                                                                                                                                                                                                                                                                                    |                                                                                                                                                                                                                     |                                                                                        |                                                                                                                                                                                                                                                                                                                                                                                                                                                                                                                                                                                                                                                                                                                                                                                                                                                                                                                                                                                               |  |  |  |  |  |                                                                                                                                                                                                                                                                                                                                                                                                                                                                                                                                                                                                                                                                                                                                                                                                                                                                                                                                                                                               |  |
| see above                                                                                                                                                                                                                                                                                                                                                                                                                                                                                                                                                                                                                                                                                                                                                                                                                                                                                                                                                                                                                                 | Pangenomics International Pvt. Ltd, Ahmedabad                                                                                                                                                                       | Gujarat Biotechnology Research Centre                                                  | Akhilesh Modi; Apurvasinh Puvar; Bhadreshsinh Gohil; Chaitanya Joshi; Disha Vora; Janvi Raval; Jaykumar Rangani; Madhvi Joshi; Nimesh Patel; Nitin Savaliya; Nitin Shukla; NitinShukla; Priyank Chavda; Ramesh Pandit; Roshani Mishra; Shashi Singh; Sonal Sharma; Tasnim Trivedi; Zarna Patel                                                                                                                                                                                                                                                                                                                                                                                                                                                                                                                                                                                                                                                                                                |  |  |  |  |  |                                                                                                                                                                                                                                                                                                                                                                                                                                                                                                                                                                                                                                                                                                                                                                                                                                                                                                                                                                                               |  |
| EPI_ISL_9588650                                                                                                                                                                                                                                                                                                                                                                                                                                                                                                                                                                                                                                                                                                                                                                                                                                                                                                                                                                                                                           | Pardubicka nemocnice                                                                                                                                                                                                | University Hospital Hradec Kralove                                                     |                                                                                                                                                                                                                                                                                                                                                                                                                                                                                                                                                                                                                                                                                                                                                                                                                                                                                                                                                                                               |  |  |  |  |  | Helena Kovarikova; Lenka Rysava; Marketa Gancarcikova; Monika Berankova                                                                                                                                                                                                                                                                                                                                                                                                                                                                                                                                                                                                                                                                                                                                                                                                                                                                                                                       |  |
| EPI_ISL_9322846, EPI_ISL_9322847, EPI_ISL_9322848                                                                                                                                                                                                                                                                                                                                                                                                                                                                                                                                                                                                                                                                                                                                                                                                                                                                                                                                                                                         | Parkway Medical And Diagnostic Center                                                                                                                                                                               | Philippine Genome Center                                                               |                                                                                                                                                                                                                                                                                                                                                                                                                                                                                                                                                                                                                                                                                                                                                                                                                                                                                                                                                                                               |  |  |  |  |  | Alethea R. de Guzman; Alyssa Joyce E. Telles; Angelica A. Garcia; Anna Ong-Lim; Benedict A. Maralit; Carlo M. Lapid; Celia Carlos; Cynthia P. Saloma; Devon Ray Pacial; Diomedes A. Cariño; Edsel Maurice Salvana; El King D. Morado; Elcid Aaron R. Pangilinan; Eva Maria Cutiongco-de la Paz; Francis A. Tablizo; Henrietta Marie Rodriguez; Jaime C. Montoya; Jan Michael C. Yap; Jarvin E. Nipales; Jo-Hannah S. Llames; John Michael Egan; John Q. Wong; Johnny A. Ong; Joshua Gregor A. Dizon; Joshua Jose Endozo; Karol Sophia Agape R. Padilla; Kris P. Punayan; Kristina Patriz Dela Cruz; Lindsay Clare D.L. Carandang; Ma. Exanii Plantig; Marc Edsel C. Ayes; Maria Rosario Singh-Vergeire; Maria Sofia L. Yangzon; Marielle M. Gamboa; Marissa Alejandra; Niña Francesca Bustamante; Razel Nikka M. Hao; Renato Jacinto Q. Mantaring; Rianna Patricia S. Cruz; Razel A. Medina; Shiela Mae M. Araiza; Yvonne Valerie Austria; Zipporah Mariebelle R. Enriquez; Zyrel V. Mollejon |  |
| EPI_ISL_9323370, EPI_ISL_9323371, EPI_ISL_9323372, EPI_ISL_9323373, EPI_ISL_9323374, EPI_ISL_9323375, EPI_ISL_9323376, EPI_ISL_9323377, EPI_ISL_9323378, EPI_ISL_9323382, EPI_ISL_9323383, EPI_ISL_9323384, EPI_ISL_9323385, EPI_ISL_9323386, EPI_ISL_9323387, EPI_ISL_9323388, EPI_ISL_9323389, EPI_ISL_9323391, EPI_ISL_9323393, EPI_ISL_9323394, EPI_ISL_9323396, EPI_ISL_9323397, EPI_ISL_9323398, EPI_ISL_9323399, EPI_ISL_9324001, EPI_ISL_9324002, EPI_ISL_9324003, EPI_ISL_9324004, EPI_ISL_9324005, EPI_ISL_9324006, EPI_ISL_9324007, EPI_ISL_9324008, EPI_ISL_9324356, EPI_ISL_9324357, EPI_ISL_9324358, EPI_ISL_9324359, EPI_ISL_9324365, EPI_ISL_9324367, EPI_ISL_9324368, EPI_ISL_9324369, EPI_ISL_9324370, EPI_ISL_9324371, EPI_ISL_9324372, EPI_ISL_9324373, EPI_ISL_9324376, EPI_ISL_9324377, EPI_ISL_9324398, EPI_ISL_9324399, EPI_ISL_9324400, EPI_ISL_9324402, EPI_ISL_9324408, EPI_ISL_9324410, EPI_ISL_9324413, EPI_ISL_9324415, EPI_ISL_9324416, EPI_ISL_9324417, EPI_ISL_9324418, EPI_ISL_9324419, EPI_ISL_9324420 |                                                                                                                                                                                                                     |                                                                                        |                                                                                                                                                                                                                                                                                                                                                                                                                                                                                                                                                                                                                                                                                                                                                                                                                                                                                                                                                                                               |  |  |  |  |  |                                                                                                                                                                                                                                                                                                                                                                                                                                                                                                                                                                                                                                                                                                                                                                                                                                                                                                                                                                                               |  |
| see above                                                                                                                                                                                                                                                                                                                                                                                                                                                                                                                                                                                                                                                                                                                                                                                                                                                                                                                                                                                                                                 | Pasig City Children's Hospital - Child's Hope                                                                                                                                                                       | Philippine Genome Center                                                               | Alethea R. de Guzman; Alyssa Joyce E. Telles; Angelica A. Garcia; Anna Ong-Lim; Benedict A. Maralit; Carlo M. Lapid; Celia Carlos; Cynthia P. Saloma; Devon Ray Pacial; Diomedes A. Cariño; Edsel Maurice Salvana; El King D. Morado; Elcid Aaron R. Pangilinan; Eva Maria Cutiongco-de la Paz; Francis A. Tablizo; Henrietta Marie Rodriguez; Jaime C. Montoya; Jan Michael C. Yap; Jarvin E. Nipales; Jo-Hannah S. Llames; John Michael Egan; John Q. Wong; Johnny A. Ong; Joshua Gregor A. Dizon; Joshua Jose Endozo; Karol Sophia Agape R. Padilla; Kris P. Punayan; Kristina Patriz Dela Cruz; Lindsay Clare D.L.                                                                                                                                                                                                                                                                                                                                                                        |  |  |  |  |  |                                                                                                                                                                                                                                                                                                                                                                                                                                                                                                                                                                                                                                                                                                                                                                                                                                                                                                                                                                                               |  |



|                                                                                                                                                                                                                                                                                                                                                                                                                                                                                                                                                                                                                                                                                                                                                                                                                                                                                                                                                                                                                                                                                                                                                                                                    |                                                                                |                                                                                                                                 |                                                                                                                                                                                                                                                                                                                                                                                                                                                                                                                                                                                                                                                                                                                                                                                                                                                                                                                                                                                                |
|----------------------------------------------------------------------------------------------------------------------------------------------------------------------------------------------------------------------------------------------------------------------------------------------------------------------------------------------------------------------------------------------------------------------------------------------------------------------------------------------------------------------------------------------------------------------------------------------------------------------------------------------------------------------------------------------------------------------------------------------------------------------------------------------------------------------------------------------------------------------------------------------------------------------------------------------------------------------------------------------------------------------------------------------------------------------------------------------------------------------------------------------------------------------------------------------------|--------------------------------------------------------------------------------|---------------------------------------------------------------------------------------------------------------------------------|------------------------------------------------------------------------------------------------------------------------------------------------------------------------------------------------------------------------------------------------------------------------------------------------------------------------------------------------------------------------------------------------------------------------------------------------------------------------------------------------------------------------------------------------------------------------------------------------------------------------------------------------------------------------------------------------------------------------------------------------------------------------------------------------------------------------------------------------------------------------------------------------------------------------------------------------------------------------------------------------|
|                                                                                                                                                                                                                                                                                                                                                                                                                                                                                                                                                                                                                                                                                                                                                                                                                                                                                                                                                                                                                                                                                                                                                                                                    |                                                                                |                                                                                                                                 | Carandang; Ma. Exanil Plantig; Marc Edsel C. Ayes; Maria Rosario Singh-Vergeire; Maria Sofia L. Yangzon; Marielle M. Gamboa; Marissa Alejandria; Niña Francesca Bustamante; Razel Nikka M. Hao; Renato Jacinto Q. Mantaring; Rianna Patricia S. Cruz; Razel A. Medina; Shiela Mae M. Araiza; Yvonne Valerie Austria; Zipporah Mariebelle R. Enriquez; Zyrel V. Mollejon                                                                                                                                                                                                                                                                                                                                                                                                                                                                                                                                                                                                                        |
| EPI_ISL_9416763, EPI_ISL_9416764                                                                                                                                                                                                                                                                                                                                                                                                                                                                                                                                                                                                                                                                                                                                                                                                                                                                                                                                                                                                                                                                                                                                                                   | Pasteur Institute in Ho Chi Minh city                                          | Department of Microbiology and Immunology                                                                                       | Dai Vo Thi Trang; Dao Hoang Thi Nhu; Giang Thanh Dang; Hang Pham Thi Thu; Loan Kim Hoang; Manh Huy Dao; Nhung Vu Pham Hong; Quang Chan Luong; Quang Duy Pham; Thang Minh Cao; Thao Nguyen Thi Ngoc; Thinh Viet Nguyen; Thuong Vu Nguyen; Uyen Phan Thi Ngoc                                                                                                                                                                                                                                                                                                                                                                                                                                                                                                                                                                                                                                                                                                                                    |
| EPI_ISL_8648494, EPI_ISL_8826129, EPI_ISL_8826239, EPI_ISL_8826256, EPI_ISL_9210252                                                                                                                                                                                                                                                                                                                                                                                                                                                                                                                                                                                                                                                                                                                                                                                                                                                                                                                                                                                                                                                                                                                | PathLab Bay of Plenty                                                          | Institute of Environmental Science and Research (ESR)                                                                           | Anja Werno; Antje van der Linden; Arlo Upton; Chris Mansell; Clare Gebbie; David Hammer; Dhanisha Patel; Dragana Drinkovic; Erasmus Smit; Gary McAuliffe; Hana Sofia Andersson; Hermes Perez; James Ussher; Jill Sherwood; Jing Wang; Joep de Lig; Josh Freeman; Julia Howard; Juliet Elvy; Lauren Jelly; Mary DeAlmeida; Matt Bakiston; Matt Storey; Matthew Rogers; Max Bloomfield; Michael Addie; Michelle Balm; Muhammad Faisal; Nikki Freed; Olin Silander; Olivia Stroeven; Rachel Boyle; Sally Roberts; SallyAnn Harbison; Sarah Cockerton; Sarah Jefferies; Sharmini Muttaiyah; Susan Morpeth; Susan Taylor; Timothy Blackmore; Vani Sathyendran; Veronica Playle; Virginia Hope; Xiaoyun Ren                                                                                                                                                                                                                                                                                          |
| EPI_ISL_8527462, EPI_ISL_8527469, EPI_ISL_8527470, EPI_ISL_8801081, EPI_ISL_8937392                                                                                                                                                                                                                                                                                                                                                                                                                                                                                                                                                                                                                                                                                                                                                                                                                                                                                                                                                                                                                                                                                                                | PathWest Laboratory Medicine WA                                                | PathWest Laboratory Medicine WA Microbial Surveillance Unit                                                                     | PathWest Laboratory Medicine WA Microbial Surveillance Unit                                                                                                                                                                                                                                                                                                                                                                                                                                                                                                                                                                                                                                                                                                                                                                                                                                                                                                                                    |
| EPI_ISL_9402823                                                                                                                                                                                                                                                                                                                                                                                                                                                                                                                                                                                                                                                                                                                                                                                                                                                                                                                                                                                                                                                                                                                                                                                    | Pathocare Pathology Laboratory, Vadodara                                       | Gujarat Biotechnology Research Centre                                                                                           | Akhilesh Modi; Apurvasinh Puvar; Bhadreshsinh Gohil; Chaitanya Joshi; Disha Vora; Janvi Raval; Jaykumar Rangani; Madhvi Joshi; Nimesh Patel; Nitin Savaliya; NitinShukla; Priyank Chavda; Ramesh Pandit; Roshani Mishra; Sonal Sharma; Tasnim Trivedi; Viral Patel; Zarna Patel                                                                                                                                                                                                                                                                                                                                                                                                                                                                                                                                                                                                                                                                                                                |
| EPI_ISL_9208165, EPI_ISL_9209567                                                                                                                                                                                                                                                                                                                                                                                                                                                                                                                                                                                                                                                                                                                                                                                                                                                                                                                                                                                                                                                                                                                                                                   | Pathogen Genomics Center, National Institute of Infectious Diseases            | Pathogen Genomics Center, National Institute of Infectious Diseases                                                             | Kentaro Itokawa; Makoto Kuroda; Masanori Hashino; Rina Tanaka; Tsuyoshi Sekizuka                                                                                                                                                                                                                                                                                                                                                                                                                                                                                                                                                                                                                                                                                                                                                                                                                                                                                                               |
| EPI_ISL_9324505, EPI_ISL_9324506, EPI_ISL_9324507, EPI_ISL_9324508, EPI_ISL_9324509, EPI_ISL_9324510, EPI_ISL_9324511, EPI_ISL_9324512, EPI_ISL_9324514, EPI_ISL_9324515, EPI_ISL_9324516, EPI_ISL_9324517, EPI_ISL_9324519, EPI_ISL_9324520, EPI_ISL_9324521, EPI_ISL_9324522, EPI_ISL_9324523, EPI_ISL_9324524, EPI_ISL_9324525, EPI_ISL_9324526, EPI_ISL_9324527, EPI_ISL_9324528, EPI_ISL_9324529, EPI_ISL_9324530, EPI_ISL_9324531, EPI_ISL_9324532, EPI_ISL_9324533, EPI_ISL_9324534, EPI_ISL_9324535, EPI_ISL_9324536, EPI_ISL_9324537, EPI_ISL_9324538, EPI_ISL_9324539, EPI_ISL_9324540, EPI_ISL_9324541, EPI_ISL_9324542, EPI_ISL_9324543, EPI_ISL_9324544, EPI_ISL_9324545, EPI_ISL_9324546, EPI_ISL_9324547, EPI_ISL_9324548, EPI_ISL_9324549, EPI_ISL_9324550, EPI_ISL_9324551, EPI_ISL_9324552, EPI_ISL_9324553, EPI_ISL_9324554, EPI_ISL_9324555, EPI_ISL_9324556, EPI_ISL_9324557, EPI_ISL_9324558, EPI_ISL_9324559, EPI_ISL_9324560, EPI_ISL_9324561, EPI_ISL_9324562, EPI_ISL_9324563, EPI_ISL_9324564, EPI_ISL_9324565, EPI_ISL_9324566, EPI_ISL_9324567, EPI_ISL_9324568, EPI_ISL_9324569, EPI_ISL_9324570, EPI_ISL_9324571, EPI_ISL_9324572, EPI_ISL_9324573, EPI_ISL_9324574 |                                                                                |                                                                                                                                 |                                                                                                                                                                                                                                                                                                                                                                                                                                                                                                                                                                                                                                                                                                                                                                                                                                                                                                                                                                                                |
| see above                                                                                                                                                                                                                                                                                                                                                                                                                                                                                                                                                                                                                                                                                                                                                                                                                                                                                                                                                                                                                                                                                                                                                                                          | Philippine Genome Center (PGC)                                                 | Philippine Genome Center                                                                                                        | Althea R. de Guzman; Alyssa Joyce E. Telles; Angelica A. Garcia; Anna Ong-Lim; Benedict A. Maralit; Carlo M. Lapid; Celia Carlos; Cynthia P. Saloma; Devon Ray Pacial; Diomedes A. Cariño; Edsel Maurice Salvana; El King D. Morado; Elcid Aaron R. Pangilinan; Eva Maria Cutiongco-de la Paz; Francis A. Tablizo; Henrietta Marie Rodriguez; Jaime C. Montoya; Jan Michael C. Yap; Jarvin E. Nipales; Jo-Hannah S. Llamas; John Michael Egan; John Q. Wong; Johnny A. Ong; Joshua Gregor A. Dizon; Joshua Jose Endozo; Karol Sophia Agape R. Padilla; Kris P. Punayan; Kristina Patriz Dela Cruz; Lindsay Clare D. L. Carandang; Ma. Exanil Plantig; Marc Edsel C. Ayes; Maria Rosario Singh-Vergeire; Maria Sofia L. Yangzon; Marielle M. Gamboa; Marissa Alejandria; Niña Francesca Bustamante; Razel Nikka M. Hao; Renato Jacinto Q. Mantaring; Rianna Patricia S. Cruz; Razel A. Medina; Shiela Mae M. Araiza; Yvonne Valerie Austria; Zipporah Mariebelle R. Enriquez; Zyrel V. Mollejon |
| EPI_ISL_9323492, EPI_ISL_9323493, EPI_ISL_9323494, EPI_ISL_9323495, EPI_ISL_9323496, EPI_ISL_9323498, EPI_ISL_9323499, EPI_ISL_9323500, EPI_ISL_9323501, EPI_ISL_9323502, EPI_ISL_9323503, EPI_ISL_9323504, EPI_ISL_9323505, EPI_ISL_9323506, EPI_ISL_9323507, EPI_ISL_9323508, EPI_ISL_9323509, EPI_ISL_9323510, EPI_ISL_9323511, EPI_ISL_9323512, EPI_ISL_9323513, EPI_ISL_9323514, EPI_ISL_9323515, EPI_ISL_9323516, EPI_ISL_9323517, EPI_ISL_9323518, EPI_ISL_9323519, EPI_ISL_9323520, EPI_ISL_9323521, EPI_ISL_9323522, EPI_ISL_9323523, EPI_ISL_9323524, EPI_ISL_9323525, EPI_ISL_9323526, EPI_ISL_9323527, EPI_ISL_9323528, EPI_ISL_9323529, EPI_ISL_9323530, EPI_ISL_9323531, EPI_ISL_9323532, EPI_ISL_9323533, EPI_ISL_9323534, EPI_ISL_9323535, EPI_ISL_9323536, EPI_ISL_9323537, EPI_ISL_9323538, EPI_ISL_9323539, EPI_ISL_9323540, EPI_ISL_9323541, EPI_ISL_9323542, EPI_ISL_9323543                                                                                                                                                                                                                                                                                                  |                                                                                |                                                                                                                                 |                                                                                                                                                                                                                                                                                                                                                                                                                                                                                                                                                                                                                                                                                                                                                                                                                                                                                                                                                                                                |
| see above                                                                                                                                                                                                                                                                                                                                                                                                                                                                                                                                                                                                                                                                                                                                                                                                                                                                                                                                                                                                                                                                                                                                                                                          | Philippine National Police Crime Laboratory (PNP Crime Lab.)                   | Philippine Genome Center                                                                                                        | Althea R. de Guzman; Alyssa Joyce E. Telles; Angelica A. Garcia; Anna Ong-Lim; Benedict A. Maralit; Carlo M. Lapid; Celia Carlos; Cynthia P. Saloma; Devon Ray Pacial; Diomedes A. Cariño; Edsel Maurice Salvana; El King D. Morado; Elcid Aaron R. Pangilinan; Eva Maria Cutiongco-de la Paz; Francis A. Tablizo; Henrietta Marie Rodriguez; Jaime C. Montoya; Jan Michael C. Yap; Jarvin E. Nipales; Jo-Hannah S. Llamas; John Michael Egan; John Q. Wong; Johnny A. Ong; Joshua Gregor A. Dizon; Joshua Jose Endozo; Karol Sophia Agape R. Padilla; Kris P. Punayan; Kristina Patriz Dela Cruz; Lindsay Clare D. L. Carandang; Ma. Exanil Plantig; Marc Edsel C. Ayes; Maria Rosario Singh-Vergeire; Maria Sofia L. Yangzon; Marielle M. Gamboa; Marissa Alejandria; Niña Francesca Bustamante; Razel Nikka M. Hao; Renato Jacinto Q. Mantaring; Rianna Patricia S. Cruz; Razel A. Medina; Shiela Mae M. Araiza; Yvonne Valerie Austria; Zipporah Mariebelle R. Enriquez; Zyrel V. Mollejon |
| EPI_ISL_9323127, EPI_ISL_9323129, EPI_ISL_9323147, EPI_ISL_9323148, EPI_ISL_9323149, EPI_ISL_9323150, EPI_ISL_9323151, EPI_ISL_9323152, EPI_ISL_9323153, EPI_ISL_9323154, EPI_ISL_9323155, EPI_ISL_9323156, EPI_ISL_9323157, EPI_ISL_9323158, EPI_ISL_9323159, EPI_ISL_9323160, EPI_ISL_9323161, EPI_ISL_9323162, EPI_ISL_9323163, EPI_ISL_9323164, EPI_ISL_9323165                                                                                                                                                                                                                                                                                                                                                                                                                                                                                                                                                                                                                                                                                                                                                                                                                                |                                                                                |                                                                                                                                 |                                                                                                                                                                                                                                                                                                                                                                                                                                                                                                                                                                                                                                                                                                                                                                                                                                                                                                                                                                                                |
| see above                                                                                                                                                                                                                                                                                                                                                                                                                                                                                                                                                                                                                                                                                                                                                                                                                                                                                                                                                                                                                                                                                                                                                                                          | Philippine Red Cross Clark Molecular Laboratory                                | Philippine Genome Center                                                                                                        | Althea R. de Guzman; Alyssa Joyce E. Telles; Angelica A. Garcia; Anna Ong-Lim; Benedict A. Maralit; Carlo M. Lapid; Celia Carlos; Cynthia P. Saloma; Devon Ray Pacial; Diomedes A. Cariño; Edsel Maurice Salvana; El King D. Morado; Elcid Aaron R. Pangilinan; Eva Maria Cutiongco-de la Paz; Francis A. Tablizo; Henrietta Marie Rodriguez; Jaime C. Montoya; Jan Michael C. Yap; Jarvin E. Nipales; Jo-Hannah S. Llamas; John Michael Egan; John Q. Wong; Johnny A. Ong; Joshua Gregor A. Dizon; Joshua Jose Endozo; Karol Sophia Agape R. Padilla; Kris P. Punayan; Kristina Patriz Dela Cruz; Lindsay Clare D. L. Carandang; Ma. Exanil Plantig; Marc Edsel C. Ayes; Maria Rosario Singh-Vergeire; Maria Sofia L. Yangzon; Marielle M. Gamboa; Marissa Alejandria; Niña Francesca Bustamante; Razel Nikka M. Hao; Renato Jacinto Q. Mantaring; Rianna Patricia S. Cruz; Razel A. Medina; Shiela Mae M. Araiza; Yvonne Valerie Austria; Zipporah Mariebelle R. Enriquez; Zyrel V. Mollejon |
| EPI_ISL_8525349, EPI_ISL_9402656, EPI_ISL_9402658                                                                                                                                                                                                                                                                                                                                                                                                                                                                                                                                                                                                                                                                                                                                                                                                                                                                                                                                                                                                                                                                                                                                                  | Platform BIS UZA/UAntwerpen                                                    | Labo Klinische Biologie, UZA                                                                                                    | Basil Britto Xavier; Christine Lammens; Herman Goossens; Ines Verbesselt; Jasmine Coppens; Kathleen Holemans; Marie Le Mercier; Veerle Matheussen                                                                                                                                                                                                                                                                                                                                                                                                                                                                                                                                                                                                                                                                                                                                                                                                                                              |
| EPI_ISL_9712645, EPI_ISL_9712646                                                                                                                                                                                                                                                                                                                                                                                                                                                                                                                                                                                                                                                                                                                                                                                                                                                                                                                                                                                                                                                                                                                                                                   | Port Health and Quarantine, Suvarnabhumi Airport                               | Thai Red Cross Emerging Infectious Diseases Clinical Center and Faculty of Medicine, Chulalongkorn University                   | Anthony R. Jones; Anutsara Jitsatja; Chanchanit Phanlop; Chonticha Klungthong; Khajohn Joonlasak; Nattakarn Thippamom; Opass Puthcharoen; Piyyawan Chinnawirotpisan; Rome Buathong; Sasiprapa Ninwattana; Sopon Iamsirithaworn; Stefan Fernandez; Supaporn Wacharapluesadee; Wudthichai Manasatienkij                                                                                                                                                                                                                                                                                                                                                                                                                                                                                                                                                                                                                                                                                          |
| EPI_ISL_9388267, EPI_ISL_9388268                                                                                                                                                                                                                                                                                                                                                                                                                                                                                                                                                                                                                                                                                                                                                                                                                                                                                                                                                                                                                                                                                                                                                                   | Prasuti griha PCR Lab                                                          | National Public Health Laboratory                                                                                               | National Public Health Laboratory Team                                                                                                                                                                                                                                                                                                                                                                                                                                                                                                                                                                                                                                                                                                                                                                                                                                                                                                                                                         |
| EPI_ISL_9402827, EPI_ISL_9059011                                                                                                                                                                                                                                                                                                                                                                                                                                                                                                                                                                                                                                                                                                                                                                                                                                                                                                                                                                                                                                                                                                                                                                   | Prayag Diagnostic, Vadodara<br>Protect Purdue Health Center (PPHC)             | Gujarat Biotechnology Research Centre<br>Animal Disease Diagnostic Laboratory, Purdue University College of Veterinary Medicine | Akhilesh Modi; Apurvasinh Puvar; Bhadreshsinh Gohil; Chaitanya Joshi; Disha Vora; Janvi Raval; Jaykumar Rangani; Madhvi Joshi; Nimesh Patel; Nitin Savaliya; NitinShukla; Pratyush Patel; Priyank Chavda; Ramesh Pandit; Roshani Mishra; Sonal Sharma; Tasnim Trivedi; Zarna Patel<br>Jobin Kattoor; Rebecca P Wilkes                                                                                                                                                                                                                                                                                                                                                                                                                                                                                                                                                                                                                                                                          |
| EPI_ISL_9682559                                                                                                                                                                                                                                                                                                                                                                                                                                                                                                                                                                                                                                                                                                                                                                                                                                                                                                                                                                                                                                                                                                                                                                                    | Public Health Authority of the Slovak Republic                                 | Biomedical Centre Martin, Jessenius Faculty of Medicine in Martin, Comenius University                                          | Dusan Loderer; Ivana Kasubova; Katarina Janikova; Maria Skerenova; Marian Grendar                                                                                                                                                                                                                                                                                                                                                                                                                                                                                                                                                                                                                                                                                                                                                                                                                                                                                                              |
| EPI_ISL_8438518, EPI_ISL_8825182                                                                                                                                                                                                                                                                                                                                                                                                                                                                                                                                                                                                                                                                                                                                                                                                                                                                                                                                                                                                                                                                                                                                                                   | Public Health Laboratory, Public Health Service Amsterdam, The Netherlands     | Department of Medical Microbiology & Infection prevention, Amsterdam University Medical Centers location AMC                    | Akke Cornelissen; Fokla Zorgdrager; Janke Schinkel; Jelle Koopsen; Judith den Uil; Marcel Jonges; Matthijs Welkers; Menno de Jong; Robin van Houdt; Sebastien Matamoros; Sjoerd Rebers; Sylvia Bruisten; Tjalling Leenstra and Mariken van der Lubben on behalf of the Amsterdam Regional Genomic epidemiology and Outbreak Surveillance (ARGOS) consortium                                                                                                                                                                                                                                                                                                                                                                                                                                                                                                                                                                                                                                    |
| EPI_ISL_8783372                                                                                                                                                                                                                                                                                                                                                                                                                                                                                                                                                                                                                                                                                                                                                                                                                                                                                                                                                                                                                                                                                                                                                                                    | Public Health Laboratory, Public Health Service, Amsterdam, The Netherlands    | iBiome                                                                                                                          | Donald van Pinxteren; Dries Budding; Martine Bos                                                                                                                                                                                                                                                                                                                                                                                                                                                                                                                                                                                                                                                                                                                                                                                                                                                                                                                                               |
| EPI_ISL_9137874, EPI_ISL_9342047, EPI_ISL_9342393, EPI_ISL_9342396, EPI_ISL_9342419, EPI_ISL_9342470, EPI_ISL_9342487, EPI_ISL_9342488, EPI_ISL_9683991, EPI_ISL_9684414                                                                                                                                                                                                                                                                                                                                                                                                                                                                                                                                                                                                                                                                                                                                                                                                                                                                                                                                                                                                                           |                                                                                |                                                                                                                                 |                                                                                                                                                                                                                                                                                                                                                                                                                                                                                                                                                                                                                                                                                                                                                                                                                                                                                                                                                                                                |
| see above                                                                                                                                                                                                                                                                                                                                                                                                                                                                                                                                                                                                                                                                                                                                                                                                                                                                                                                                                                                                                                                                                                                                                                                          | Public Health Ontario Laboratory                                               | Public Health Ontario Laboratory                                                                                                | Aimin Li; Alireza Eshaghi; Andre Villegas; Ashleigh Sullivan; Christine Frantz; Dean Maxwell; Esha Joshi; Jared Simpson; Jennifer L. Guthrie; Jonathan B Gubbay; Karthikeyan Sivaraman; Lawrence Heister; Matthew Watson; Michael CY Li; Michael Laszloffy; Nahuel Fittipaldi; Philip Banh; Richard de Borja; Samir N Patel; Sandeep Nagra; Sandra Zittermann; Sarah Teaturo; Vanessa G Allen; Yao Chen; Yogi Sundaravadanam                                                                                                                                                                                                                                                                                                                                                                                                                                                                                                                                                                   |
| EPI_ISL_9430198                                                                                                                                                                                                                                                                                                                                                                                                                                                                                                                                                                                                                                                                                                                                                                                                                                                                                                                                                                                                                                                                                                                                                                                    | QRG MEDICARE LIMITED COVID                                                     | Molecular Genetics Laboratory, THSTI, Faridabad                                                                                 | DR. JYOTI VERMA; DR.BHABATOSH DAS; MS.SONALI POREY KARMAKAR                                                                                                                                                                                                                                                                                                                                                                                                                                                                                                                                                                                                                                                                                                                                                                                                                                                                                                                                    |
| EPI_ISL_8989771, EPI_ISL_9156994, EPI_ISL_9157292, EPI_ISL_9312272, EPI_ISL_9491640, EPI_ISL_9491663, EPI_ISL_9491855, EPI_ISL_9491858, EPI_ISL_9560955, EPI_ISL_9561613, EPI_ISL_9587010, EPI_ISL_9587109                                                                                                                                                                                                                                                                                                                                                                                                                                                                                                                                                                                                                                                                                                                                                                                                                                                                                                                                                                                         |                                                                                |                                                                                                                                 |                                                                                                                                                                                                                                                                                                                                                                                                                                                                                                                                                                                                                                                                                                                                                                                                                                                                                                                                                                                                |
| see above                                                                                                                                                                                                                                                                                                                                                                                                                                                                                                                                                                                                                                                                                                                                                                                                                                                                                                                                                                                                                                                                                                                                                                                          | Quadram Institute Bioscience                                                   | COVID-19 Genomics UK (COG-UK) Consortium                                                                                        | Alexander J Trotter; Ana Martínez Gascuña; Andrew J. Page; Darcie Burgess; Dave J. Baker; Leonardo de Oliveira Martins; Lizzie Meadows; Martin Lott; Michaela Matthews; Nabil-Fareed Alikhan; Rebecca Sutcliffe; Rhianon Evans; Thanh Le-Viet                                                                                                                                                                                                                                                                                                                                                                                                                                                                                                                                                                                                                                                                                                                                                  |
| EPI_ISL_9744319, EPI_ISL_9744320, EPI_ISL_9744321, EPI_ISL_9744322, EPI_ISL_9744323                                                                                                                                                                                                                                                                                                                                                                                                                                                                                                                                                                                                                                                                                                                                                                                                                                                                                                                                                                                                                                                                                                                | RESEARCH INSTITUTE FOR TROPICAL MEDICINE                                       | Research Institute for Tropical Medicine                                                                                        | Alexander Sadiasa; Anne Pauline A. Alpino; Ariane Ysabelle M. Dolor; Catalino S. Demetria; Criselda T. Bautista; Francisco Gerardo M. Polotan; Jefferson Earl J. Halog; Joseph Hughes; Kirstyn Brunker; Lei Lanna M. Dancel; Ma. Angelica A. Tujan; Mayan Uy-Lumandas; Othaniel Jan T. Onza; Simon Daldry; Timothy John R. Dizon; Vina Lea F. Arguelles; Yao-Tsun Li                                                                                                                                                                                                                                                                                                                                                                                                                                                                                                                                                                                                                           |
| EPI_ISL_9372501, EPI_ISL_9607733                                                                                                                                                                                                                                                                                                                                                                                                                                                                                                                                                                                                                                                                                                                                                                                                                                                                                                                                                                                                                                                                                                                                                                   | REUNILAB<br>REUNILAB PLT TECH 2 CANONS                                         | UMR PIMIT<br>Laboratoire de virologie, CNR arbovirus Associé, Chu de la Réunion                                                 | Dr Camille Lebarbenchon; Dr David A Wilkinson; Dr Jonathan Turpin; Dr Patrick Mavingui; Magali Turpin; Marie-Alice Simbi<br>Anne-Julie Gourdé; Etienne Frumence; Marie-Christine Jaffar Bandjee; Nicolas M'nemosyme; Nicolas Traversier; Rubens Lhonneur                                                                                                                                                                                                                                                                                                                                                                                                                                                                                                                                                                                                                                                                                                                                       |
| EPI_ISL_9287814, EPI_ISL_9287815                                                                                                                                                                                                                                                                                                                                                                                                                                                                                                                                                                                                                                                                                                                                                                                                                                                                                                                                                                                                                                                                                                                                                                   | RS Abdi Waluyo                                                                 | National Institute of Health Research and Development                                                                           | Arie Ardiansyah Nugraha; Fajar Nur Sulistyohadi; Hana Apsari Pawestri; Hartanti Dian Ikawati; Kartika Dewi Puspa; Nelly Puspandari; Nur Ika Hariastuti; Putri Widia; Subangkit; Vivi Setiawaty                                                                                                                                                                                                                                                                                                                                                                                                                                                                                                                                                                                                                                                                                                                                                                                                 |
| EPI_ISL_9287781                                                                                                                                                                                                                                                                                                                                                                                                                                                                                                                                                                                                                                                                                                                                                                                                                                                                                                                                                                                                                                                                                                                                                                                    | RS Kartika Pulomas                                                             | National Institute of Health Research and Development                                                                           | Arie Ardiansyah Nugraha; Fajar Nur Sulistyohadi; Hana Apsari Pawestri; Hartanti Dian Ikawati; Kartika Dewi Puspa; Nelly Puspandari; Nur Ika Hariastuti; Puri Widia; Subangkit; Vivi Setiawaty                                                                                                                                                                                                                                                                                                                                                                                                                                                                                                                                                                                                                                                                                                                                                                                                  |
| EPI_ISL_9287817                                                                                                                                                                                                                                                                                                                                                                                                                                                                                                                                                                                                                                                                                                                                                                                                                                                                                                                                                                                                                                                                                                                                                                                    | RSUP Persahabatan                                                              | National Institute of Health Research and Development                                                                           | Arie Ardiansyah Nugraha; Fajar Nur Sulistyohadi; Hana Apsari Pawestri; Hartanti Dian Ikawati; Kartika Dewi Puspa; Nelly Puspandari; Nur Ika Hariastuti; Putri Widia; Subangkit; Vivi Setiawaty                                                                                                                                                                                                                                                                                                                                                                                                                                                                                                                                                                                                                                                                                                                                                                                                 |
| EPI_ISL_8782891                                                                                                                                                                                                                                                                                                                                                                                                                                                                                                                                                                                                                                                                                                                                                                                                                                                                                                                                                                                                                                                                                                                                                                                    | RUE DU BERGEANT 79 CHWAPI - SITE NOTRE DAME                                    | Institut de Pathologie et Genetique (IPG)                                                                                       | Jérémie Gras; Pascale Hilbert                                                                                                                                                                                                                                                                                                                                                                                                                                                                                                                                                                                                                                                                                                                                                                                                                                                                                                                                                                  |
| EPI_ISL_9697284, EPI_ISL_9697285, EPI_ISL_9697286                                                                                                                                                                                                                                                                                                                                                                                                                                                                                                                                                                                                                                                                                                                                                                                                                                                                                                                                                                                                                                                                                                                                                  | Rajshahi Medical College, Rajshahi                                             | Virology Laboratory, International Centre for Diarrhoeal Disease Research, Bangladesh (ICDDR,B)                                 | ASM Alamgir; Ahmed Nawsher Alam; Araf Mahmud; Dinesh Mondal; Firdausi Qadri; Hassan Afrad; Mahbubur Rahman; Manjur Hossain Khan; Md. Mahfuzur Rahman; Mohammad Enayet Hossain; Mohammad Jubair; Mohammad Shahidul Islam; Mohammed Ziaur Rahman; Mojinu Miah; Mustafizur Rahman; Razib Mazumder; Sabera Gul Nahar; Samir Kumar Saha; Senjuti Saha; Shovan Basak Moon; Tahmina Shiin                                                                                                                                                                                                                                                                                                                                                                                                                                                                                                                                                                                                             |
| EPI_ISL_8884879, EPI_ISL_9061929, EPI_ISL_9158460, EPI_ISL_9158516, EPI_ISL_9158999, EPI_ISL_9159492, EPI_ISL_9159533, EPI_ISL_9229214, EPI_ISL_9287984, EPI_ISL_9291072, EPI_ISL_9312824, EPI_ISL_9446984, EPI_ISL_9493273, EPI_ISL_9563158, EPI_ISL_9588712, EPI_ISL_9588972, EPI_ISL_9588977, EPI_ISL_9589008, EPI_ISL_9691549, EPI_ISL_9781331                                                                                                                                                                                                                                                                                                                                                                                                                                                                                                                                                                                                                                                                                                                                                                                                                                                 |                                                                                |                                                                                                                                 |                                                                                                                                                                                                                                                                                                                                                                                                                                                                                                                                                                                                                                                                                                                                                                                                                                                                                                                                                                                                |
| see above                                                                                                                                                                                                                                                                                                                                                                                                                                                                                                                                                                                                                                                                                                                                                                                                                                                                                                                                                                                                                                                                                                                                                                                          | Respiratory Virus Unit, Microbiology Services Colindale, Public Health England | COVID-19 Genomics UK (COG-UK) Consortium                                                                                        | PHÉ Covid Sequencing Team                                                                                                                                                                                                                                                                                                                                                                                                                                                                                                                                                                                                                                                                                                                                                                                                                                                                                                                                                                      |
| EPI_ISL_9705411, EPI_ISL_9705448, EPI_ISL_9705470, EPI_ISL_9705500, EPI_ISL_9705561, EPI_ISL_9705659, EPI_ISL_9705672                                                                                                                                                                                                                                                                                                                                                                                                                                                                                                                                                                                                                                                                                                                                                                                                                                                                                                                                                                                                                                                                              |                                                                                |                                                                                                                                 |                                                                                                                                                                                                                                                                                                                                                                                                                                                                                                                                                                                                                                                                                                                                                                                                                                                                                                                                                                                                |
| see above                                                                                                                                                                                                                                                                                                                                                                                                                                                                                                                                                                                                                                                                                                                                                                                                                                                                                                                                                                                                                                                                                                                                                                                          | Riga East University Hospital, National Microbiology Reference Laboratory      | Riga East University Hospital, National Microbiology Reference Laboratory; Eurofins Genomics Europe Sequencing GmbH             | Anastasija Žuravlova; Arzu Alguileva; Diāna Dušacka; Dārta Pūpola; Ilva Pole; Jevgenijs Bodrenko; Jūlija Čevere; Kristine Lielina; Oksana Savicka; Reinis Vangravs; Reinis Zeltmatīns; Sergejs Nīkišins; Ģirts Šķēdēns                                                                                                                                                                                                                                                                                                                                                                                                                                                                                                                                                                                                                                                                                                                                                                         |

|                                                                                                                                                                                                                                                                                                                                                                                                                                                                                                                                                                                                                                                                                                                                                                                                                                                                                                                                                                                                                                                                                                                                                                                                                                                                                                                                                                                                                |           |                                                                    |                                                                                                                          |                                                                                                                                                                                                                                                                                                                                                                                                                                                                                                                                                                                                                                                                                                                                                                                                                                                                                                                                                                                                  |
|----------------------------------------------------------------------------------------------------------------------------------------------------------------------------------------------------------------------------------------------------------------------------------------------------------------------------------------------------------------------------------------------------------------------------------------------------------------------------------------------------------------------------------------------------------------------------------------------------------------------------------------------------------------------------------------------------------------------------------------------------------------------------------------------------------------------------------------------------------------------------------------------------------------------------------------------------------------------------------------------------------------------------------------------------------------------------------------------------------------------------------------------------------------------------------------------------------------------------------------------------------------------------------------------------------------------------------------------------------------------------------------------------------------|-----------|--------------------------------------------------------------------|--------------------------------------------------------------------------------------------------------------------------|--------------------------------------------------------------------------------------------------------------------------------------------------------------------------------------------------------------------------------------------------------------------------------------------------------------------------------------------------------------------------------------------------------------------------------------------------------------------------------------------------------------------------------------------------------------------------------------------------------------------------------------------------------------------------------------------------------------------------------------------------------------------------------------------------------------------------------------------------------------------------------------------------------------------------------------------------------------------------------------------------|
| EPI_ISL_8771430, EPI_ISL_8774383, EPI_ISL_8778515, EPI_ISL_8847896, EPI_ISL_8847987, EPI_ISL_8863849, EPI_ISL_8944869, EPI_ISL_8966379                                                                                                                                                                                                                                                                                                                                                                                                                                                                                                                                                                                                                                                                                                                                                                                                                                                                                                                                                                                                                                                                                                                                                                                                                                                                         | see above | Rosalind Franklin Laboratory                                       | Wellcome Sanger Institute for the COVID-19 Genomics UK (COG-UK) Consortium                                               | Cordelia Langford; David K. Jackson; Dominic Kwiatkowski; Donald Fraser; Ewan Harrison; Ian Johnston; Jeffrey Barrett; John Sillitoe on behalf of the Wellcome Sanger Institute COVID-19 Surveillance Team; Rob Howes; Roberto Amato; Sonia Goncalves; Suki Lee; The Rosalind Franklin Laboratory and Alex Alderton                                                                                                                                                                                                                                                                                                                                                                                                                                                                                                                                                                                                                                                                              |
| EPI_ISL_9323544, EPI_ISL_9323545, EPI_ISL_9323546, EPI_ISL_9323547, EPI_ISL_9323551, EPI_ISL_9323552, EPI_ISL_9323553, EPI_ISL_9323554, EPI_ISL_9323555, EPI_ISL_9323556, EPI_ISL_9323773, EPI_ISL_9323979, EPI_ISL_9324084, EPI_ISL_9324085                                                                                                                                                                                                                                                                                                                                                                                                                                                                                                                                                                                                                                                                                                                                                                                                                                                                                                                                                                                                                                                                                                                                                                   | see above | Roxas Memorial Provincial Hospital Molecular Laboratory            | Philippine Genome Center                                                                                                 | Alethea R. de Guzman; Alyssa Joyce E. Telles; Angelica A. Garcia; Anna Ong-Lim; Benedict A. Maralit; Carlo M. Lapid; Celia Carlos; Cynthia P. Saloma; Devon Ray Pacial; Diomedes A. Cariño; Edsel Maurice Salvana; El King D. Morado; Elcid Aaron R. Pangilinan; Eva Maria Cutiongco-de la Paz; Francis A. Tablizo; Henrietta Marie Rodriguez; Jaime C. Montoya; Jan Michael C. Yap; Jarvin E. Nipales; Jo-Hannah S. Llames; John Michael Egana; John Q. Wong; Johnny A. Ong; Joshua Gregor A. Dizon; Joshua Jose Endozo; Karol Sophia Agape R. Padilla; Kris P. Punayan; Kristina Patriz Dela Cruz; Lindsay Clare D.L. Carandang; Ma. Exanil Plantig; Marc Edsel C. Ayes; Maria Rosario Singh-Vergeire; Maria Sofia L. Yangzon; Marielle M. Gamboa; Marissa Alejandria; Niña Francesca Bustamante; Razel Nikka M. Hao; Renato Jacinto Q. Mantaring; Rianna Patricia S. Cruz; Razel A. Medina; Shiela Mae M. Araiza; Yvonne Valerie Austria; Zipporah Mariebelle R. Enriquez; Zyrrel V. Mollejon |
| EPI_ISL_9222743, EPI_ISL_9222753, EPI_ISL_9222755                                                                                                                                                                                                                                                                                                                                                                                                                                                                                                                                                                                                                                                                                                                                                                                                                                                                                                                                                                                                                                                                                                                                                                                                                                                                                                                                                              |           | SA Pathology                                                       | SA Pathology                                                                                                             | Caitlin Selway; Chuan Kok Lim; Ivan Bastian; Lex Leong; Mark Turra                                                                                                                                                                                                                                                                                                                                                                                                                                                                                                                                                                                                                                                                                                                                                                                                                                                                                                                               |
| EPI_ISL_9620158                                                                                                                                                                                                                                                                                                                                                                                                                                                                                                                                                                                                                                                                                                                                                                                                                                                                                                                                                                                                                                                                                                                                                                                                                                                                                                                                                                                                |           | SARS-CoV-2 Sequencing Castilla y Leon-Spain Consortium             | SARS-CoV-2 Sequencing Castilla y Leon-Spain Consortium                                                                   | Antonio Orduña-Domingo; Carlos Fuster Foz; Carmen Aldea-Mansilla; Carmen Gimeno Crespo; David Abad; Gabriel March Rosello; Gregoria Megias Lobón; Jose María Eiros Bouza; M. Isabel Fernandez-Natal; Marta Domínguez-Gil; Marta Hernandez; María Antonia García Castro; M <sup>o</sup> Fe Brezmes-Valdivieso; Noelia Arenal Andrés; Silvia Rojo; Sonsoles Garcinuño Pérez                                                                                                                                                                                                                                                                                                                                                                                                                                                                                                                                                                                                                        |
| EPI_ISL_8560301, EPI_ISL_8919813, EPI_ISL_8919825, EPI_ISL_8919846, EPI_ISL_8919893, EPI_ISL_8919903, EPI_ISL_8919904, EPI_ISL_8919906, EPI_ISL_8919907, EPI_ISL_8919908, EPI_ISL_8919923, EPI_ISL_8919959, EPI_ISL_8919960, EPI_ISL_8919961, EPI_ISL_8919971, EPI_ISL_8919973, EPI_ISL_8919978, EPI_ISL_8920002, EPI_ISL_8920033, EPI_ISL_8920034, EPI_ISL_8920036, EPI_ISL_8920064, EPI_ISL_8920091, EPI_ISL_8920129, EPI_ISL_8920130, EPI_ISL_8920131, EPI_ISL_8920132, EPI_ISL_8920133, EPI_ISL_8920134, EPI_ISL_8920135, EPI_ISL_8920136, EPI_ISL_8920137, EPI_ISL_8920138, EPI_ISL_8920139, EPI_ISL_8920140, EPI_ISL_8920141, EPI_ISL_8920142, EPI_ISL_8920143, EPI_ISL_8920144, EPI_ISL_8920233, EPI_ISL_8920236, EPI_ISL_8920252, EPI_ISL_8920266, EPI_ISL_8920268, EPI_ISL_8920269, EPI_ISL_8920270, EPI_ISL_8920296, EPI_ISL_8920297, EPI_ISL_8920298, EPI_ISL_8920334, EPI_ISL_8920345, EPI_ISL_8920346, EPI_ISL_8920356, EPI_ISL_8920362, EPI_ISL_8920393, EPI_ISL_8920394, EPI_ISL_8920396, EPI_ISL_8920407, EPI_ISL_8920415, EPI_ISL_8920417, EPI_ISL_8920419, EPI_ISL_8920420, EPI_ISL_8920421, EPI_ISL_8920438, EPI_ISL_8920441, EPI_ISL_9302678, EPI_ISL_9303682, EPI_ISL_9303688, EPI_ISL_9303689, EPI_ISL_9303690, EPI_ISL_9303691, EPI_ISL_9303692, EPI_ISL_9303693, EPI_ISL_9303697, EPI_ISL_9303709, EPI_ISL_9303711, EPI_ISL_9303712, EPI_ISL_9303716, EPI_ISL_9303717, EPI_ISL_9303719 | see above | SARS-CoV-2 testing team, National Institute of Infectious Diseases | Pathogen Genomics Center, National Institute of Infectious Diseases                                                      | Hazuka Y Furihata; Kentaro Itokawa; Makoto Kuroda; Masanori Hashino; Masumichi Saito; Naomi Nojiri; Nozomu Hanaoka; Rina Tanaka; Tsuguto Fujimoto; Tsuyoshi Sekizuka                                                                                                                                                                                                                                                                                                                                                                                                                                                                                                                                                                                                                                                                                                                                                                                                                             |
| EPI_ISL_9166612                                                                                                                                                                                                                                                                                                                                                                                                                                                                                                                                                                                                                                                                                                                                                                                                                                                                                                                                                                                                                                                                                                                                                                                                                                                                                                                                                                                                |           | SC (UCO) Igiene e Sanità Pubblica, ASUGI, Trieste                  | Istituto di Genomica Applicata                                                                                           | Davide Scaglione; Eleonora Paparelli; G Forciniti; Gabriele Magris; Irena Jurman; L Segat; Michele Morgante; Pierlanfranco D'Agaro; R Koncan; Vera Vendramin                                                                                                                                                                                                                                                                                                                                                                                                                                                                                                                                                                                                                                                                                                                                                                                                                                     |
| EPI_ISL_9403385, EPI_ISL_9403566, EPI_ISL_9403756, EPI_ISL_9477269                                                                                                                                                                                                                                                                                                                                                                                                                                                                                                                                                                                                                                                                                                                                                                                                                                                                                                                                                                                                                                                                                                                                                                                                                                                                                                                                             |           | SK-Roy Romanow Provincial Laboratory                               | National Microbiology Laboratory (NML)                                                                                   | Alanna Senecal; Amanda Lang; Anna Majer; Anneliese Landgraf; CanCOGen's metadata curation team; Darian Hole; Elsie Grudeski; Gary Van Domselaar; Grace Seo; Jennifer Tanner; Jessica Minion; Kara Loos; Keith MacKenzie; Kirsten Biggar; Madison Chapel; Meredith Faires; Morag Graham; Natalie Knox; Nathalie Bastien; Philip Mabon; Public Health Agency of Canada CanCOGen team; Rachel; Rachel DePaulo; Rhiannon Huzarewich; Russell Mandes; Ryan McDonald; Shari Tyson; Timothy Booth; Yan Li                                                                                                                                                                                                                                                                                                                                                                                                                                                                                               |
| EPI_ISL_8796992, EPI_ISL_8796993                                                                                                                                                                                                                                                                                                                                                                                                                                                                                                                                                                                                                                                                                                                                                                                                                                                                                                                                                                                                                                                                                                                                                                                                                                                                                                                                                                               |           | SK-Roy Romanow Provincial Laboratory                               | Saskatchewan - Roy Romanow Provincial Laboratory (RRPL)                                                                  | Alanna Senecal; Amanda Lang; Jessica Minion; Kara Loos; Keith MacKenzie; Meredith Faires; Rachel DePaulo; Roy Romanow Provincial Laboratory - Molecular Diagnostics; Ryan McDonald                                                                                                                                                                                                                                                                                                                                                                                                                                                                                                                                                                                                                                                                                                                                                                                                               |
| EPI_ISL_9023160, EPI_ISL_9023184, EPI_ISL_9233976                                                                                                                                                                                                                                                                                                                                                                                                                                                                                                                                                                                                                                                                                                                                                                                                                                                                                                                                                                                                                                                                                                                                                                                                                                                                                                                                                              |           | SSG Hospital Vadodara                                              | Gujarat Biotechnology Research Centre                                                                                    | Akhilesh Modi; Apurvasinh Puvar; Bhadreshsinh Gohil; Chaitanya Joshi; Disha Vora; Janvi Raval; Jaykumar Rangani; Jigna Karia; Madhvi Joshi; Nimesh Patel; Nitin Savaliya; Nitin Shukla; NitinShukla; Priyank Chavda; Ramesh Pandit; Roshani Mishra; Sonal Sharma; Tasnim Trivedi; Zarna Patel                                                                                                                                                                                                                                                                                                                                                                                                                                                                                                                                                                                                                                                                                                    |
| EPI_ISL_9218269, EPI_ISL_9078854, EPI_ISL_9107969                                                                                                                                                                                                                                                                                                                                                                                                                                                                                                                                                                                                                                                                                                                                                                                                                                                                                                                                                                                                                                                                                                                                                                                                                                                                                                                                                              |           | SYNLAB Jena Oncoscreen                                             | Robert Koch Institute                                                                                                    | Robert Koch Institute                                                                                                                                                                                                                                                                                                                                                                                                                                                                                                                                                                                                                                                                                                                                                                                                                                                                                                                                                                            |
| EPI_ISL_8683697, EPI_ISL_9079582, EPI_ISL_9083371, EPI_ISL_9083443, EPI_ISL_9083549, EPI_ISL_9107763, EPI_ISL_9107813, EPI_ISL_9108099                                                                                                                                                                                                                                                                                                                                                                                                                                                                                                                                                                                                                                                                                                                                                                                                                                                                                                                                                                                                                                                                                                                                                                                                                                                                         | see above | SYNLAB MVZ Leinfelden-Echterdingen                                 | Robert Koch Institute                                                                                                    | Eri Onuma; Hayato Ehara; Kentaro Itokawa; Masanori Hashino; Rina Tanaka; Satoshi Daisaki; Tsuyoshi Sekizuka                                                                                                                                                                                                                                                                                                                                                                                                                                                                                                                                                                                                                                                                                                                                                                                                                                                                                      |
| EPI_ISL_9053967                                                                                                                                                                                                                                                                                                                                                                                                                                                                                                                                                                                                                                                                                                                                                                                                                                                                                                                                                                                                                                                                                                                                                                                                                                                                                                                                                                                                |           | SYNLAB MVZ Leverkusen                                              | Robert Koch Institute                                                                                                    |                                                                                                                                                                                                                                                                                                                                                                                                                                                                                                                                                                                                                                                                                                                                                                                                                                                                                                                                                                                                  |
| EPI_ISL_9053874, EPI_ISL_9054298, EPI_ISL_9080235, EPI_ISL_9082993, EPI_ISL_9083582, EPI_ISL_9083740, EPI_ISL_9102554, EPI_ISL_9102585, EPI_ISL_9102677, EPI_ISL_9108121, EPI_ISL_9207279, EPI_ISL_9207562                                                                                                                                                                                                                                                                                                                                                                                                                                                                                                                                                                                                                                                                                                                                                                                                                                                                                                                                                                                                                                                                                                                                                                                                     | see above | SYNLAB MVZ Weiden                                                  | Robert Koch Institute                                                                                                    |                                                                                                                                                                                                                                                                                                                                                                                                                                                                                                                                                                                                                                                                                                                                                                                                                                                                                                                                                                                                  |
| EPI_ISL_9218804                                                                                                                                                                                                                                                                                                                                                                                                                                                                                                                                                                                                                                                                                                                                                                                                                                                                                                                                                                                                                                                                                                                                                                                                                                                                                                                                                                                                |           | Saitama Institute of Public Health                                 | Saitama Institute of Public Health                                                                                       | Eri Onuma; Hayato Ehara; Kentaro Itokawa; Masanori Hashino; Rina Tanaka; Satoshi Daisaki; Tsuyoshi Sekizuka                                                                                                                                                                                                                                                                                                                                                                                                                                                                                                                                                                                                                                                                                                                                                                                                                                                                                      |
| EPI_ISL_9023183, EPI_ISL_9234057                                                                                                                                                                                                                                                                                                                                                                                                                                                                                                                                                                                                                                                                                                                                                                                                                                                                                                                                                                                                                                                                                                                                                                                                                                                                                                                                                                               |           | Sanjeevani Metropolis, Rajkot                                      | Gujarat Biotechnology Research Centre                                                                                    | Akhilesh Modi; Apurvasinh Puvar; Bhadreshsinh Gohil; Chaitanya Joshi; Disha Vora; Janvi Raval; Jaykumar Rangani; Madhvi Joshi; Nimesh Patel; Nitin Savaliya; NitinShukla; Priyank Chavda; Ramesh Pandit; Roshani Mishra; Shaquaq Jahan; Sonal Sharma; Tasnim Trivedi; Zarna Patel                                                                                                                                                                                                                                                                                                                                                                                                                                                                                                                                                                                                                                                                                                                |
| EPI_ISL_9234052                                                                                                                                                                                                                                                                                                                                                                                                                                                                                                                                                                                                                                                                                                                                                                                                                                                                                                                                                                                                                                                                                                                                                                                                                                                                                                                                                                                                |           | Sanjivani Laboratory, Ahmedabad                                    | Gujarat Biotechnology Research Centre                                                                                    | Akhilesh Modi; Apurvasinh Puvar; Bhadreshsinh Gohil; Chaitanya Joshi; Disha Vora; Janvi Raval; Jaykumar Rangani; Madhvi Joshi; Nimesh Patel; Nitin Savaliya; NitinShukla; Priyank Chavda; Rajnikant Patel; Ramesh Pandit; Roshani Mishra; Sonal Sharma; Tasnim Trivedi; Zarna Patel                                                                                                                                                                                                                                                                                                                                                                                                                                                                                                                                                                                                                                                                                                              |
| EPI_ISL_9773741, EPI_ISL_9773742, EPI_ISL_9773743                                                                                                                                                                                                                                                                                                                                                                                                                                                                                                                                                                                                                                                                                                                                                                                                                                                                                                                                                                                                                                                                                                                                                                                                                                                                                                                                                              |           | School of Public Health, HKU                                       | The University of Hong Kong School of Public Health                                                                      | HaoGao Gu; Leo LM Poon; Malik Peiris; Samuel MS Cheng                                                                                                                                                                                                                                                                                                                                                                                                                                                                                                                                                                                                                                                                                                                                                                                                                                                                                                                                            |
| EPI_ISL_9570707                                                                                                                                                                                                                                                                                                                                                                                                                                                                                                                                                                                                                                                                                                                                                                                                                                                                                                                                                                                                                                                                                                                                                                                                                                                                                                                                                                                                |           | School of Public Health, The University of Hong Kong               | The University of Hong Kong School of Public Health                                                                      | HaoGao Gu; Leo LM Poon; Malik Peiris; Samuel MS Cheng                                                                                                                                                                                                                                                                                                                                                                                                                                                                                                                                                                                                                                                                                                                                                                                                                                                                                                                                            |
| EPI_ISL_9781687                                                                                                                                                                                                                                                                                                                                                                                                                                                                                                                                                                                                                                                                                                                                                                                                                                                                                                                                                                                                                                                                                                                                                                                                                                                                                                                                                                                                |           | School of Tropical Medicine, Kolkata                               | CSIR-Indian Institute of Chemical Biology                                                                                | Arun Bandyopadhyay; INSACOG; Partha Chakrabarti; Poulomi Sarkar; Saikat Chakrabarti; Sarthak Banerjee; Siddik Sarkar                                                                                                                                                                                                                                                                                                                                                                                                                                                                                                                                                                                                                                                                                                                                                                                                                                                                             |
| EPI_ISL_9023201, EPI_ISL_9233969, EPI_ISL_9234054, EPI_ISL_9234055, EPI_ISL_9234056, EPI_ISL_9234061, EPI_ISL_9234062                                                                                                                                                                                                                                                                                                                                                                                                                                                                                                                                                                                                                                                                                                                                                                                                                                                                                                                                                                                                                                                                                                                                                                                                                                                                                          | see above | Scientific Diagnostic Centre Pvt.Ltd, Ahmedabad                    | Gujarat Biotechnology Research Centre                                                                                    | Akhilesh Modi; Apurvasinh Puvar; Bhadreshsinh Gohil; Chaitanya Joshi; Disha Vora; Janak; Janvi Raval; Jaykumar Rangani; Madhvi Joshi; Mona; Nimesh Patel; Nitin Savaliya; Nitin Shukla; NitinShukla; Priyank Chavda; Ramesh Pandit; Roshani Mishra; Sonal Sharma; Tasnim Trivedi; Zarna Patel                                                                                                                                                                                                                                                                                                                                                                                                                                                                                                                                                                                                                                                                                                    |
| EPI_ISL_8822434, EPI_ISL_9060453, EPI_ISL_9060464, EPI_ISL_9346767, EPI_ISL_9346803, EPI_ISL_9346818                                                                                                                                                                                                                                                                                                                                                                                                                                                                                                                                                                                                                                                                                                                                                                                                                                                                                                                                                                                                                                                                                                                                                                                                                                                                                                           |           | Seattle Flu Study                                                  | Seattle Flu Study                                                                                                        | Amanda Adler; Barry R. Lutz; Benjamin Pelle; Caitlin R. Wolf; Chris D. Frazer; Deborah A. Nickerson; Elisabeth Brandstetter; Erica Ryke; Helen Y. Chu; Janet A. Englund; Jay Shendure; Jover Lee; Kairsten Fay; Kirsten Lacombe; Lea M. Starita; Mark J. Rieder; Matthew Richardson; Matthew Thompson; Melissa Truong; Michael Boeckh; Michael Famulare; Misja Ilcisin; Peter D. Han; Thomas R. Sibley; Trevor Bedford                                                                                                                                                                                                                                                                                                                                                                                                                                                                                                                                                                           |
| EPI_ISL_9605186, EPI_ISL_9605193, EPI_ISL_9606683                                                                                                                                                                                                                                                                                                                                                                                                                                                                                                                                                                                                                                                                                                                                                                                                                                                                                                                                                                                                                                                                                                                                                                                                                                                                                                                                                              |           | Shamir Medical Center (Asaf Harofe)                                | Shamir Medical Center (Asaf Harofe)                                                                                      | Abu Hamad Ramzia; Adina Bar Chaim; Anna Vishnevsky; Chen Weiner; Nir Rainy; Patricia Benveniste-Lekovitz; Reut Sorek Abramovich; Yevgeni Yegorov                                                                                                                                                                                                                                                                                                                                                                                                                                                                                                                                                                                                                                                                                                                                                                                                                                                 |
| EPI_ISL_9233986, EPI_ISL_9196061                                                                                                                                                                                                                                                                                                                                                                                                                                                                                                                                                                                                                                                                                                                                                                                                                                                                                                                                                                                                                                                                                                                                                                                                                                                                                                                                                                               |           | Shantaba Medical College, Amreli                                   | Gujarat Biotechnology Research Centre                                                                                    | Akhilesh Modi; Apurvasinh Puvar; Bhadreshsinh Gohil; Chaitanya Joshi; Disha Vora; Hetvi; Janvi Raval; Jaykumar Rangani; Madhvi Joshi; Nimesh Patel; Nitin Savaliya; NitinShukla; Priyank Chavda; Ramesh Pandit; Roshani Mishra; Sonal Sharma; Tasnim Trivedi; Zarna Patel                                                                                                                                                                                                                                                                                                                                                                                                                                                                                                                                                                                                                                                                                                                        |
| EPI_ISL_9697256, EPI_ISL_9697258                                                                                                                                                                                                                                                                                                                                                                                                                                                                                                                                                                                                                                                                                                                                                                                                                                                                                                                                                                                                                                                                                                                                                                                                                                                                                                                                                                               |           | Sharp HealthCare Laboratory                                        | Andersen lab at Scripps Research                                                                                         | Art Mendoza; Cathy Woerle; Jacquelyn Berumen; Liam McGinnis; Omid Bakhtar; SEARCH Alliance San Diego with Aron Harding                                                                                                                                                                                                                                                                                                                                                                                                                                                                                                                                                                                                                                                                                                                                                                                                                                                                           |
| EPI_ISL_9095510, EPI_ISL_9095573                                                                                                                                                                                                                                                                                                                                                                                                                                                                                                                                                                                                                                                                                                                                                                                                                                                                                                                                                                                                                                                                                                                                                                                                                                                                                                                                                                               |           | Sher-E-Bangla Medical College, Barishal                            | Virology Laboratory, International Centre for Diarrhoeal Disease Research, Bangladesh (ICDDR,B)                          | A K M Akbar Kabir; ASM Alamgir; Ahmed Nawsher Alam; Araf Mahmud; Dinesh Mondal; Firdaus Qadri; Hassan Afrad; Mahbubur Rahman; Manjur Hossain Khan; Md. Mahfuzur Rahman; Mohammad Anayet Hossain; Mohammad Jubair; Mohammad Shahidul Islam; Mohammed Ziaur Rahman; Mojuu Miah; Mustafizur Rahman; Razib Mazumder; Samir Kumar Saha; Senjuti Saha; Shovan Basak Moom; Tahmina Shirin                                                                                                                                                                                                                                                                                                                                                                                                                                                                                                                                                                                                               |
| EPI_ISL_9323200, EPI_ISL_9323201                                                                                                                                                                                                                                                                                                                                                                                                                                                                                                                                                                                                                                                                                                                                                                                                                                                                                                                                                                                                                                                                                                                                                                                                                                                                                                                                                                               |           | Sirirhorn Hospital                                                 | Division of Genomic Medicine and Innovation support, Department of Medical Sciences, Ministry of Public Health, Thailand | Archawin Rojanawitwat; Jirapha Pakdee; Natthakul Bunneang; Nuanjun Wichukhinda; Penpitcha Thawong; Pilailuk Akkapaiboon Okada; Pundharika Piboonsiri; Surakameth Mahasirimongkol; Waritta Sawaengdee                                                                                                                                                                                                                                                                                                                                                                                                                                                                                                                                                                                                                                                                                                                                                                                             |
| EPI_ISL_9397184, EPI_ISL_9397220, EPI_ISL_9397225                                                                                                                                                                                                                                                                                                                                                                                                                                                                                                                                                                                                                                                                                                                                                                                                                                                                                                                                                                                                                                                                                                                                                                                                                                                                                                                                                              |           | Smartco Labororium                                                 | National Institute of Health Research and Development                                                                    | Arie Ardiansyah Nugraha; Fajar Nur Sulistyohadi; Hana Apsari Pawestri; Hartanti Dian Ikawati; Kartika Dewi Puspa; Nelly Puspandari; Nur Ika Hariastuti; Puri Widia; Putri Widia; Subangkit; Vivi Setiawaty                                                                                                                                                                                                                                                                                                                                                                                                                                                                                                                                                                                                                                                                                                                                                                                       |
| EPI_ISL_9731117                                                                                                                                                                                                                                                                                                                                                                                                                                                                                                                                                                                                                                                                                                                                                                                                                                                                                                                                                                                                                                                                                                                                                                                                                                                                                                                                                                                                |           | Sonic - Bioscientia - MVZ Labor Saar GmbH                          | Robert Koch Institute                                                                                                    |                                                                                                                                                                                                                                                                                                                                                                                                                                                                                                                                                                                                                                                                                                                                                                                                                                                                                                                                                                                                  |
| EPI_ISL_9219302                                                                                                                                                                                                                                                                                                                                                                                                                                                                                                                                                                                                                                                                                                                                                                                                                                                                                                                                                                                                                                                                                                                                                                                                                                                                                                                                                                                                |           | Sonic - Labor Dr. von Froreich GmbH                                | Robert Koch Institute                                                                                                    |                                                                                                                                                                                                                                                                                                                                                                                                                                                                                                                                                                                                                                                                                                                                                                                                                                                                                                                                                                                                  |
| EPI_ISL_9259255                                                                                                                                                                                                                                                                                                                                                                                                                                                                                                                                                                                                                                                                                                                                                                                                                                                                                                                                                                                                                                                                                                                                                                                                                                                                                                                                                                                                |           | Southern Nevada Public Health Laboratory                           | Southern Nevada Public Health Laboratory                                                                                 | Horng-Yuan Kan; Michael Picker                                                                                                                                                                                                                                                                                                                                                                                                                                                                                                                                                                                                                                                                                                                                                                                                                                                                                                                                                                   |
| EPI_ISL_9323200, EPI_ISL_9323201                                                                                                                                                                                                                                                                                                                                                                                                                                                                                                                                                                                                                                                                                                                                                                                                                                                                                                                                                                                                                                                                                                                                                                                                                                                                                                                                                                               |           | Southern Philippines Medical Center (SPMC-SNL-MBL)                 | Philippine Genome Center                                                                                                 | Alethea R. de Guzman; Alyssa Joyce E. Telles; Angelica A. Garcia; Anna Ong-Lim; Benedict A. Maralit; Carlo M. Lapid; Celia Carlos; Cynthia P. Saloma; Devon Ray Pacial; Diomedes A. Cariño; Edsel Maurice Salvana; El King D. Morado; Elcid Aaron R. Pangilinan; Eva Maria Cutiongco-de la Paz; Francis A. Tablizo; Henrietta Marie Rodriguez; Jaime C. Montoya; Jan Michael C. Yap; Jarvin E. Nipales; Jo-Hannah S. Llames; John Michael Egana; John Q. Wong; Johnny A. Ong; Joshua Gregor A. Dizon; Joshua Jose Endozo; Karol Sophia Agape R. Padilla; Kris P. Punayan; Kristina Patriz Dela Cruz; Lindsay Clare D.L. Carandang; Ma. Exanil Plantig; Marc Edsel C. Ayes; Maria Rosario Singh-Vergeire; Maria Sofia L. Yangzon; Marielle M. Gamboa; Marissa Alejandria; Niña Francesca Bustamante; Razel Nikka M. Hao; Renato Jacinto Q. Mantaring; Rianna Patricia S. Cruz; Razel A. Medina; Shiela Mae M. Araiza; Yvonne Valerie Austria; Zipporah Mariebelle R. Enriquez; Zyrrel V. Mollejon |
| EPI_ISL_8829831                                                                                                                                                                                                                                                                                                                                                                                                                                                                                                                                                                                                                                                                                                                                                                                                                                                                                                                                                                                                                                                                                                                                                                                                                                                                                                                                                                                                |           | Spital Langenthal                                                  | Medizinische Klinik, Spital Region Oberargau                                                                             | Alexander Imhof; Cedric Howald; Deborah Penet; Henri Pegeot; Ioannis Xenarios; Keith Harshman; Lorenzo Cerutti; Melyssa Elies                                                                                                                                                                                                                                                                                                                                                                                                                                                                                                                                                                                                                                                                                                                                                                                                                                                                    |
| EPI_ISL_9323325, EPI_ISL_9323326                                                                                                                                                                                                                                                                                                                                                                                                                                                                                                                                                                                                                                                                                                                                                                                                                                                                                                                                                                                                                                                                                                                                                                                                                                                                                                                                                                               |           | St. Elizabeth Hospital                                             | Philippine Genome Center                                                                                                 | Alethea R. de Guzman; Alyssa Joyce E. Telles; Angelica A. Garcia; Anna Ong-Lim; Benedict A. Maralit; Carlo M. Lapid; Celia Carlos; Cynthia P. Saloma; Devon Ray Pacial; Diomedes A. Cariño; Edsel Maurice Salvana; El King D. Morado; Elcid Aaron R. Pangilinan; Eva Maria Cutiongco-de la Paz; Francis A. Tablizo; Henrietta Marie Rodriguez; Jaime C. Montoya; Jan Michael C. Yap; Jarvin E. Nipales; Jo-Hannah S. Llames; John Michael Egana; John Q. Wong; Johnny A. Ong; Joshua Gregor A. Dizon; Joshua Jose Endozo; Karol Sophia Agape R. Padilla; Kris P. Punayan; Kristina Patriz Dela Cruz; Lindsay Clare D.L. Carandang; Ma. Exanil Plantig; Marc Edsel C. Ayes; Maria Rosario Singh-Vergeire; Maria Sofia L. Yangzon; Marielle M. Gamboa; Marissa Alejandria; Niña Francesca Bustamante; Razel Nikka M. Hao; Renato Jacinto Q. Mantaring; Rianna Patricia S. Cruz; Razel A. Medina; Shiela Mae M. Araiza; Yvonne Valerie Austria; Zipporah Mariebelle R. Enriquez; Zyrrel V. Mollejon |
| EPI_ISL_9323328, EPI_ISL_9323329                                                                                                                                                                                                                                                                                                                                                                                                                                                                                                                                                                                                                                                                                                                                                                                                                                                                                                                                                                                                                                                                                                                                                                                                                                                                                                                                                                               |           | St. Louis Molecular Diagnostic Laboratory                          | Philippine Genome Center                                                                                                 | Alethea R. de Guzman; Alyssa Joyce E. Telles; Angelica A. Garcia; Anna Ong-Lim; Benedict A. Maralit; Carlo M. Lapid; Celia Carlos; Cynthia P. Saloma; Devon Ray Pacial; Diomedes A. Cariño; Edsel Maurice Salvana; El King D. Morado; Elcid Aaron R. Pangilinan; Eva Maria Cutiongco-de la Paz; Francis A. Tablizo; Henrietta Marie Rodriguez; Jaime C. Montoya; Jan Michael C. Yap; Jarvin E. Nipales; Jo-Hannah S. Llames; John Michael Egana; John Q. Wong; Johnny A. Ong; Joshua Gregor A. Dizon; Joshua Jose Endozo; Karol Sophia Agape R. Padilla; Kris P. Punayan; Kristina Patriz Dela Cruz; Lindsay Clare D.L. Carandang; Ma. Exanil Plantig; Marc Edsel C. Ayes; Maria Rosario Singh-Vergeire; Maria Sofia L. Yangzon; Marielle M. Gamboa; Marissa Alejandria; Niña Francesca Bustamante; Razel Nikka M. Hao; Renato Jacinto Q. Mantaring; Rianna Patricia S. Cruz; Razel A. Medina; Shiela Mae M. Araiza; Yvonne Valerie Austria; Zipporah Mariebelle R. Enriquez; Zyrrel V. Mollejon |
| EPI_ISL_8753896,                                                                                                                                                                                                                                                                                                                                                                                                                                                                                                                                                                                                                                                                                                                                                                                                                                                                                                                                                                                                                                                                                                                                                                                                                                                                                                                                                                                               |           | Star Hospital                                                      | Molecular and Genomics Research Lab,                                                                                     | Dipesh Tamrakar; Nishan Katuwal; Rajeev Shrestha; Surendra Kumar Madhup                                                                                                                                                                                                                                                                                                                                                                                                                                                                                                                                                                                                                                                                                                                                                                                                                                                                                                                          |

|                                                                                                                                                                                                                                                                                                                                                                     |                                           |                                                                                                 |                                                                                                                                                                                                                                                                                                                                                                                                                                                                                                                                                                                                                                                                                                                                                                                                                                                                                                                                                                                                                                                                                                                                                                                                                                                                                                                                                                                                                                                                                                                                                                                                                                                                                                                |
|---------------------------------------------------------------------------------------------------------------------------------------------------------------------------------------------------------------------------------------------------------------------------------------------------------------------------------------------------------------------|-------------------------------------------|-------------------------------------------------------------------------------------------------|----------------------------------------------------------------------------------------------------------------------------------------------------------------------------------------------------------------------------------------------------------------------------------------------------------------------------------------------------------------------------------------------------------------------------------------------------------------------------------------------------------------------------------------------------------------------------------------------------------------------------------------------------------------------------------------------------------------------------------------------------------------------------------------------------------------------------------------------------------------------------------------------------------------------------------------------------------------------------------------------------------------------------------------------------------------------------------------------------------------------------------------------------------------------------------------------------------------------------------------------------------------------------------------------------------------------------------------------------------------------------------------------------------------------------------------------------------------------------------------------------------------------------------------------------------------------------------------------------------------------------------------------------------------------------------------------------------------|
| EPI_ISL_8753963,<br>EPI_ISL_8753964                                                                                                                                                                                                                                                                                                                                 |                                           | Dhulikhel Hospital, Kathmandu University Hospital                                               |                                                                                                                                                                                                                                                                                                                                                                                                                                                                                                                                                                                                                                                                                                                                                                                                                                                                                                                                                                                                                                                                                                                                                                                                                                                                                                                                                                                                                                                                                                                                                                                                                                                                                                                |
| EPI_ISL_9233971, EPI_ISL_9233987, EPI_ISL_9234072, EPI_ISL_9234073, EPI_ISL_9234074, EPI_ISL_9234075                                                                                                                                                                                                                                                                |                                           |                                                                                                 | EPI_ISL_9353764, EPI_ISL_9604323, EPI_ISL_9604324                                                                                                                                                                                                                                                                                                                                                                                                                                                                                                                                                                                                                                                                                                                                                                                                                                                                                                                                                                                                                                                                                                                                                                                                                                                                                                                                                                                                                                                                                                                                                                                                                                                              |
| see above                                                                                                                                                                                                                                                                                                                                                           | Sterling Diagnostic Center, Bhavnagar     | Gujarat Biotechnology Research Centre                                                           | Akhilesh Modi; Apurvashin Puvar; Bhadrashsinh Gohil; Chaitanya Joshi; Disha Vora; Janvi Raval; Jaykumar Rangani; Krupal Hapani; Madhvi Joshi; Nimesh Patel; Nitin Savaliya; NitinShukla; Priyank Chavda; Ramesh Pandit; Roshani Mishra; Sonal Sharma; Tasnim Trivedi; Zarna Patel                                                                                                                                                                                                                                                                                                                                                                                                                                                                                                                                                                                                                                                                                                                                                                                                                                                                                                                                                                                                                                                                                                                                                                                                                                                                                                                                                                                                                              |
| EPI_ISL_8885408                                                                                                                                                                                                                                                                                                                                                     | Sunflower Laboratory, Memnagar, Ahmedabad | Gujarat Biotechnology Research Centre                                                           | Akhilesh Modi; Apurvashin Puvar; Bhadrashsinh Gohil; Chaitanya Joshi; D.G.Patel; Disha Vora; Janvi Raval; Jaykumar Rangani; Madhvi Joshi; Nimesh Patel; Nitin Savaliya; NitinShukla; Priyank Chavda; Ramesh Pandit; Roshani Mishra; Sonal Sharma; Tasnim Trivedi; Zarna Patel                                                                                                                                                                                                                                                                                                                                                                                                                                                                                                                                                                                                                                                                                                                                                                                                                                                                                                                                                                                                                                                                                                                                                                                                                                                                                                                                                                                                                                  |
| EPI_ISL_9324187, EPI_ISL_9324188, EPI_ISL_9324189, EPI_ISL_9324190, EPI_ISL_9324191, EPI_ISL_9324192, EPI_ISL_9324193, EPI_ISL_9324194, EPI_ISL_9324195, EPI_ISL_9324196, EPI_ISL_9324197, EPI_ISL_9324198, EPI_ISL_9324355                                                                                                                                         | see above                                 | Supercare Medical Services, Inc. Philippine Genome Center                                       | Althea R. de Guzman; Alyssa Joyce E. Telles; Angelica A. Garcia; Anna Ong-Lim; Benedict A. Marali; Carlo M. Lapid; Celia Carlos; Cynthia P. Saloma; Devon Ray Pacial; Diomedes A. Carriño; Edsel Maurice Salvana; El King D. Morado; Elcid Aaron R. Pangilinan; Eva Maria Cutionco-de la Paz; Francis A. Tablizo; Henrietta Marie Rodriguez; Jaime C. Montoya; Jan Michael C. Yap; Jarvin E. Nipales; Jo-Hannah S. Llamas; John Michael Egan; John Q. Wong; Johnny A. Ong; Joshua Gregor A. Dizon; Joshua Jose Endozo; Karol Sophia Agape R. Padilla; Kris P. Punayan; Kristina Patriz Dela Cruz; Lindsay Clare D.L. Carandang; Ma. Exanil Planting; Marc Edsel C. Ayes; Maria Rosario Singh-Vergiere; Maria Sofia L. Yangzon; Marielle M. Gamboa; Marissa Alejandria; Niña Francesca Bustamante; Razel Nikka M. Hao; Renato Jacinto Q. Mantaring; Rianna Patricia S. Cruz; Rizel A. Medina; Shiela Mae M. Araiza; Yvonne Valerie Austria; Zipporah Mariebelle R. Enriquez; Zyrel V. Mollejon                                                                                                                                                                                                                                                                                                                                                                                                                                                                                                                                                                                                                                                                                                                  |
| EPI_ISL_9023216, EPI_ISL_9023217, EPI_ISL_9234042, EPI_ISL_9234043, EPI_ISL_9234044, EPI_ISL_9234045, EPI_ISL_9234046, EPI_ISL_9234076, EPI_ISL_9234077, EPI_ISL_9236226, EPI_ISL_9403019, EPI_ISL_9403020, EPI_ISL_9403021, EPI_ISL_9403031, EPI_ISL_9403032, EPI_ISL_9403034, EPI_ISL_9403035, EPI_ISL_9403036, EPI_ISL_9403039, EPI_ISL_9403040, EPI_ISL_9604306 | see above                                 | Supratex Microphat Diagnostics & Research laboratory Ahmedabad                                  | Gujarat Biotechnology Research Centre Akhilesh Modi; Ameer Shukla; Apurvashin Puvar; Bhadrashsinh Gohil; Chaitanya Joshi; Disha Vora; Janvi Raval; Jaykumar Rangani; Madhvi Joshi; Nimesh Patel; Nitin Savaliya; Nitin Shukla; NitinShukla; Priyank Chavda; Ramesh Pandit; Roshani Mishra; Sonal Sharma; Tasnim Trivedi; Zarna Patel                                                                                                                                                                                                                                                                                                                                                                                                                                                                                                                                                                                                                                                                                                                                                                                                                                                                                                                                                                                                                                                                                                                                                                                                                                                                                                                                                                           |
| EPI_ISL_8885518, EPI_ISL_9023147, EPI_ISL_9023148, EPI_ISL_9023149, EPI_ISL_9023168, EPI_ISL_9610190, EPI_ISL_9610191, EPI_ISL_9610223, EPI_ISL_9610257                                                                                                                                                                                                             | see above                                 | Surat Municipal Institute of Medical Education and Research (SMIMER), Surat                     | Gujarat Biotechnology Research Centre Akhilesh Modi; Apurvashin Puvar; Bhadrashsinh Gohil; Chaitanya Joshi; Disha Vora; Gaurishankar Shrimali; Janvi Raval; Jaykumar Rangani; Madhvi Joshi; Manish Patel; Nimesh Patel; Nitin Savaliya; NitinShukla; Priyank Chavda; Ramesh Pandit; Roshani Mishra; Sonal Sharma; Tasnim Trivedi; Zarna Patel                                                                                                                                                                                                                                                                                                                                                                                                                                                                                                                                                                                                                                                                                                                                                                                                                                                                                                                                                                                                                                                                                                                                                                                                                                                                                                                                                                  |
| EPI_ISL_9169949, EPI_ISL_9169950, EPI_ISL_9169953                                                                                                                                                                                                                                                                                                                   | see above                                 | Sweden, Sodermanland, Unilabs                                                                   | Unilabs, Eskilstuna, Sweden Emma Arvidsson                                                                                                                                                                                                                                                                                                                                                                                                                                                                                                                                                                                                                                                                                                                                                                                                                                                                                                                                                                                                                                                                                                                                                                                                                                                                                                                                                                                                                                                                                                                                                                                                                                                                     |
| EPI_ISL_9416262, EPI_ISL_9416284, EPI_ISL_9416316, EPI_ISL_9416331, EPI_ISL_9416398                                                                                                                                                                                                                                                                                 | see above                                 | Sweden, Vastragotaland, Unilabs                                                                 | Unilabs, Eskilstuna, Sweden Emma Arvidsson                                                                                                                                                                                                                                                                                                                                                                                                                                                                                                                                                                                                                                                                                                                                                                                                                                                                                                                                                                                                                                                                                                                                                                                                                                                                                                                                                                                                                                                                                                                                                                                                                                                                     |
| EPI_ISL_9697250, EPI_ISL_9697253                                                                                                                                                                                                                                                                                                                                    | Sylhet MAG Osmani Medical College, Sylhet | Virology Laboratory, International Centre for Diarrhoeal Disease Research, Bangladesh (ICDDR,B) | ASM Alamgir; Ahmed Nawsher Alam; Araf Mahmud; Dinesh Mondal; Firdausi Qadri; Hassan Afrad; Mahbubur Rahman; Manjur Hossain Khan; Md. Mahfuzur Rahman; Mohammad Enayet Hossain; Mohammad Jubair; Mohammad Shahidul Islam; Mohammed Ziaur Rahman; Mojin Miah; Mustafizur Rahman; Premananda Das; Razib Mazumder; Samir Kumar Saha; Senjuti Saha; Shovan Basak Moon; Tahmina Shirin                                                                                                                                                                                                                                                                                                                                                                                                                                                                                                                                                                                                                                                                                                                                                                                                                                                                                                                                                                                                                                                                                                                                                                                                                                                                                                                               |
| EPI_ISL_9233985, EPI_ISL_9234058, EPI_ISL_9234059, EPI_ISL_9234060, EPI_ISL_9402806, EPI_ISL_9402807, EPI_ISL_9402815, EPI_ISL_9604284, EPI_ISL_9604367, EPI_ISL_9604368                                                                                                                                                                                            | see above                                 | Symmers Pathocare Laboratory - Ahmedabad                                                        | Gujarat Biotechnology Research Centre Akhilesh Modi; Apurvashin Puvar; Bhadrashsinh Gohil; Chaitanya Joshi; Disha Vora; Janvi Raval; Jaykumar Rangani; Madhvi Joshi; Nimesh Patel; Nitin Savaliya; NitinShukla; Priyank Chavda; Ramesh Pandit; Roshani Mishra; Sonal Sharma; Tasnim Trivedi; Umang Gandhi; Zarna Patel                                                                                                                                                                                                                                                                                                                                                                                                                                                                                                                                                                                                                                                                                                                                                                                                                                                                                                                                                                                                                                                                                                                                                                                                                                                                                                                                                                                         |
| EPI_ISL_9649705, EPI_ISL_9649707, EPI_ISL_9649708, EPI_ISL_9663139, EPI_ISL_9663158                                                                                                                                                                                                                                                                                 | see above                                 | Synlab Eesti OÜ                                                                                 | 1. Laboratory of Communicable Diseases (Estonia); 2. Eurofins Genomics Europe Sequencing GmbH Abroi A.; Avi R.; Dotsenko L.; Epštejn J.; Hoidmets D.; Huik K.; Härma M-A.; Jaanisoo E.; Kaarna K.; Kallas E.; Koppel I.; Kuzmin I.; Lahesaare A.; Lutsar I.; Metspalu M.; Milani L.; Naaber P.; Niglas H.; Oopkaup O.E.; Pauskar M.; Peterson H.; Päll T.; Ratnik K.; Raudvere U.; Reisberg T.; Sadikova O.; Sepp H.; Shablinskaja A.; Suija H.; Talas U.G.; Truusalu K.                                                                                                                                                                                                                                                                                                                                                                                                                                                                                                                                                                                                                                                                                                                                                                                                                                                                                                                                                                                                                                                                                                                                                                                                                                       |
| EPI_ISL_9275784, EPI_ISL_9275788                                                                                                                                                                                                                                                                                                                                    | see above                                 | Szpital Solec                                                                                   | 1. Tricity SARS-CoV-2 sequencing consortium: University of Gdansk, Medical University of Gdansk, Vaxican Ltd., Invicta Ltd. 2. National Institute of Public Health - National Institute of Hygiene, Warsaw, Poland Celina Cybulska; Karolina Gackowska; Katarzyna Groth; Katarzyna Zacharczuk; Krystyna Bienkowska Szewczyk; Lukasz Rabalski; Maciej Grzybek; Maciej Kosinski; Magdalena Nowakowska; Marcin Lubocki; Małgorzata Sadkowska-Todys; Tomasz Wołkowicz                                                                                                                                                                                                                                                                                                                                                                                                                                                                                                                                                                                                                                                                                                                                                                                                                                                                                                                                                                                                                                                                                                                                                                                                                                              |
| EPI_ISL_9392306                                                                                                                                                                                                                                                                                                                                                     | see above                                 | Szpital Uniwersytecki Nr 1 w Bydgoszczy (im. dra Antoniego Jurasza w Bydgoszczy)                | 1. Tricity SARS-CoV-2 sequencing consortium: University of Gdansk, Medical University of Gdansk, Vaxican Ltd., Invicta Ltd. 2. National Institute of Public Health - National Institute of Hygiene, Warsaw, Poland Celina Cybulska; Karolina Gackowska; Katarzyna Groth; Katarzyna Zacharczuk; Krystyna Bienkowska Szewczyk; Lukasz Rabalski; Maciej Grzybek; Maciej Kosinski; Magdalena Nowakowska; Marcin Lubocki; Małgorzata Sadkowska-Todys; Tomasz Wołkowicz                                                                                                                                                                                                                                                                                                                                                                                                                                                                                                                                                                                                                                                                                                                                                                                                                                                                                                                                                                                                                                                                                                                                                                                                                                              |
| EPI_ISL_9193186                                                                                                                                                                                                                                                                                                                                                     | see above                                 | TGen North                                                                                      | TGen North Brett Van Tassel; Chris French; Darrin Lemmer; Dave Engelthaler; Hayley Yaglom; Heather Centner; Jolene Bowers                                                                                                                                                                                                                                                                                                                                                                                                                                                                                                                                                                                                                                                                                                                                                                                                                                                                                                                                                                                                                                                                                                                                                                                                                                                                                                                                                                                                                                                                                                                                                                                      |
| EPI_ISL_9402187, EPI_ISL_9402188, EPI_ISL_9402189, EPI_ISL_9402196                                                                                                                                                                                                                                                                                                  | see above                                 | TSHEPONG LABORATORY                                                                             | National Institute for Communicable Diseases of the National Health Laboratory Service Amoako DG; Bhiman JN; Everatt J; Ismail A; Kekana D; Mahlangu B; Mnguni A; Mohale T; Ntuli N; Scheepers C; Wolter N                                                                                                                                                                                                                                                                                                                                                                                                                                                                                                                                                                                                                                                                                                                                                                                                                                                                                                                                                                                                                                                                                                                                                                                                                                                                                                                                                                                                                                                                                                     |
| EPI_ISL_8766889                                                                                                                                                                                                                                                                                                                                                     | see above                                 | The Ohio State University Applied Microbiology Services Laboratory                              | The Ohio State University Applied Microbiology Services Laboratory Seth A. Faith PhD                                                                                                                                                                                                                                                                                                                                                                                                                                                                                                                                                                                                                                                                                                                                                                                                                                                                                                                                                                                                                                                                                                                                                                                                                                                                                                                                                                                                                                                                                                                                                                                                                           |
| EPI_ISL_8936681, EPI_ISL_9397331                                                                                                                                                                                                                                                                                                                                    | see above                                 | Tokyo Metropolitan Institute of Public Health                                                   | Tokyo Metropolitan Institute of Public Health Akane Negishi; Arisa Amano; Hirofumi Miyake; Jun Suzuki; Kenji Sadamasa; Kenshirou Kuroki; Mami Nagashima; Masaki Hayashi; Maya Isogai; Takako Yamazaki; Takushi Fujiwara                                                                                                                                                                                                                                                                                                                                                                                                                                                                                                                                                                                                                                                                                                                                                                                                                                                                                                                                                                                                                                                                                                                                                                                                                                                                                                                                                                                                                                                                                        |
| EPI_ISL_9023158, EPI_ISL_9023159, EPI_ISL_9610197                                                                                                                                                                                                                                                                                                                   | see above                                 | Toprani Advance lab Systems, Vadodara                                                           | Gujarat Biotechnology Research Centre Akhilesh Modi; Apurvashin Puvar; Bhadrashsinh Gohil; Chaitanya Joshi; Disha Vora; Janvi Raval; Jaykumar Rangani; Madhvi Joshi; Nimesh Patel; Nitin Savaliya; NitinShukla; Priyank Chavda; Ramesh Pandit; Roshani Mishra; Sonal Sharma; Tasnim Trivedi; Tuskar Toprani; Zarna Patel                                                                                                                                                                                                                                                                                                                                                                                                                                                                                                                                                                                                                                                                                                                                                                                                                                                                                                                                                                                                                                                                                                                                                                                                                                                                                                                                                                                       |
| EPI_ISL_8824283, EPI_ISL_9305120                                                                                                                                                                                                                                                                                                                                    | see above                                 | Tripler Army Medical Center                                                                     | Tripler Army Medical Center Jonathan Andrew D'Ambrozio                                                                                                                                                                                                                                                                                                                                                                                                                                                                                                                                                                                                                                                                                                                                                                                                                                                                                                                                                                                                                                                                                                                                                                                                                                                                                                                                                                                                                                                                                                                                                                                                                                                         |
| EPI_ISL_9048250, EPI_ISL_9110969, EPI_ISL_9110980                                                                                                                                                                                                                                                                                                                   | see above                                 | UC Davis Genome Center                                                                          | UC Davis Genome Center Antonio Jorge Martins; Claudia Renata dos Santos Barros; David Schlesinger; Debora Botequão Moretti; Dimas Tadeu Covas; Elaine Cristina Marqueze; Elaine Vieira Santos; Evandra Strazza Rodrigues; Heidge Fukumasa; Jayme Augusto de Souza-Neto; José Salvatore Leister Patané; Luiz Alcantara; Luiz Lehmann Coutinho; Maria Carolina Elias; Maurício Lacerda Nogueira; Rafael dos Santos Bezerra; Raul Machado Neto; Rejane Maria Tommasini Grotto; Ricardo Haddad; Sandra Cocuzzo Sampaio Vessoni; Simone Kashima; Svetoslav Nanev Slavov; Vincent Louis Viala                                                                                                                                                                                                                                                                                                                                                                                                                                                                                                                                                                                                                                                                                                                                                                                                                                                                                                                                                                                                                                                                                                                        |
| EPI_ISL_9003408, EPI_ISL_9003409                                                                                                                                                                                                                                                                                                                                    | see above                                 | ULS Castelo Branco                                                                              | Instituto Nacional de Saude (INSA) Borges et al                                                                                                                                                                                                                                                                                                                                                                                                                                                                                                                                                                                                                                                                                                                                                                                                                                                                                                                                                                                                                                                                                                                                                                                                                                                                                                                                                                                                                                                                                                                                                                                                                                                                |
| EPI_ISL_8787923                                                                                                                                                                                                                                                                                                                                                     | see above                                 | UNC Charlotte COVID-19 Testing Lab                                                              | UNC Charlotte Environmental Monitoring Laboratory Cynthia Gibas; Jannatul Ferdous; Jessica Schlueter; Juan Bolanos; Kevin Lambirth; Samuel Kunkleman; Torri Weathers                                                                                                                                                                                                                                                                                                                                                                                                                                                                                                                                                                                                                                                                                                                                                                                                                                                                                                                                                                                                                                                                                                                                                                                                                                                                                                                                                                                                                                                                                                                                           |
| EPI_ISL_9003411, EPI_ISL_9003414                                                                                                                                                                                                                                                                                                                                    | see above                                 | UNILABS                                                                                         | Instituto Nacional de Saude (INSA) Borges et al                                                                                                                                                                                                                                                                                                                                                                                                                                                                                                                                                                                                                                                                                                                                                                                                                                                                                                                                                                                                                                                                                                                                                                                                                                                                                                                                                                                                                                                                                                                                                                                                                                                                |
| EPI_ISL_9752676, EPI_ISL_9752702                                                                                                                                                                                                                                                                                                                                    | see above                                 | US Air Force School of Aerospace Medicine                                                       | US Air Force School of Aerospace Medicine Anthony Fries; Carol Garrett; Clarise Starr; Cole Anderson; Deanna Muehleman; Elizabeth Macias; Fritz Castillo; Jennifer Black; Jennifer Meyer; Kelsey Lanter; Sarah Purves; William Gruner                                                                                                                                                                                                                                                                                                                                                                                                                                                                                                                                                                                                                                                                                                                                                                                                                                                                                                                                                                                                                                                                                                                                                                                                                                                                                                                                                                                                                                                                          |
| EPI_ISL_8979042, EPI_ISL_9481856, EPI_ISL_9481860                                                                                                                                                                                                                                                                                                                   | see above                                 | USC Clinical Lab                                                                                | Los Angeles County Public Health Laboratories A.R. Gener et al.                                                                                                                                                                                                                                                                                                                                                                                                                                                                                                                                                                                                                                                                                                                                                                                                                                                                                                                                                                                                                                                                                                                                                                                                                                                                                                                                                                                                                                                                                                                                                                                                                                                |
| EPI_ISL_9570061                                                                                                                                                                                                                                                                                                                                                     | see above                                 | Unidad de Investigación Médica de Yucatán (UIMY)                                                | Instituto de Biotecnología de la UNAM ; Alejandra García-Gasca; Alejandra Hernández-Terán; Alejandro Sánchez-Flores; Alfredo Herrera-Estrella; Alicia Ocaña-Mondragón; Andreu Comas-García; Angel Gustavo Salas-Lais; Antonio Loza Román; Bernardo Martínez-Miguel; Blanca Taboada; Brenda Irasema Maldonado-Meza; Bruno Gómez-Gil; Carla Ivón Herrera-Najera; Carlos F. Arias; Celia Boukadida; Clara Esperanza Santacruz-Tinoco; Concepción Grajales-Muñiz; Consorcio Mexicano de Vigilancia Genómica (CoViGen-Mex). Authors (in alphabetical order): Julio Elias Alvarado-Yaah; Cristóbal Cháidez-Quiróz; Célida Duque Molina; Célida Martínez- Rodríguez; Daniel Fregoso-Rueda; Daniel Lira Morales; Eduardo Becerril-Vargas; Fernando Fontove-Herrera; Fidencio Mejía-Nepomuceno; Francisco Pulido; Gloria Elena Espinosa-Ayala; Gloria María Molina-Salinas; Gloria Vazquez; Hector Esteban Paz-Juárez; Hector Montoya-Fuentes; Helen Haydeee Fernanda Ramirez-Plascencia; Irvin González-López; Jean Pierre González; Jesús Hernández; José Armando Vázquez-Pérez.; Jorge Salas-Hernández; José Antonio Enciso-Moreno; José Arturo Martínez-Orozco; José Esteban Muñoz-Medina; José de Jesús Nuñez-Contreras; Juan Bautista Chale-Dzul; Julissa Enciso-Ibarra; Kathia Elizabeth Tapia-Díaz; Luis Alberto Ochoa-Carrera; Margarita Matías-Florentino; Mario Mújica-Sánchez; Marissa Perez-García; María Guadalupe Santiago-Mauricio; María Guadalupe de Jesús Mireles-Rivera; Nelly Sélem-Mojica; Pavel Isa; Ricardo Ciria Merce; Ricardo Grande; Rosa María Gutiérrez Rios; Santiago Ávila-Ríos; Selene Zárate; Susana Lopez; Verónica Mata-Haro; Víctor Eduardo García-Arias; Víctor Hugo Borja-Aburto |
| EPI_ISL_9103980, EPI_ISL_9103981, EPI_ISL_9459412                                                                                                                                                                                                                                                                                                                   | see above                                 | Uniklinikum Regensburg; Institut für klinische Mikrobiologie und Hygiene                        | Robert Koch Institute                                                                                                                                                                                                                                                                                                                                                                                                                                                                                                                                                                                                                                                                                                                                                                                                                                                                                                                                                                                                                                                                                                                                                                                                                                                                                                                                                                                                                                                                                                                                                                                                                                                                                          |
| EPI_ISL_9480407, EPI_ISL_9626197, EPI_ISL_9626523, EPI_ISL_9626524                                                                                                                                                                                                                                                                                                  | see above                                 | Unilabs Laboratory Medicine                                                                     | Norwegian Institute of Public Health, Department of Virology Atiya R Ali; Debec Nadia; Engebretsen Serina Beate; Garcia Llorente Ignacio; Hilde Elshaug; Hilde Nordby Falkenhaus; Hilde Volla; Jon Bråte; Kamilla Heddeland Instefjord; Karoline Bragstad; Kathrine Stene-Johansen; Line Victoria Moen; Marie Paulsen Madsen; Olav Hungnes; Pedersen Benedikte Nevjen; Rasmus Riis Kopperud                                                                                                                                                                                                                                                                                                                                                                                                                                                                                                                                                                                                                                                                                                                                                                                                                                                                                                                                                                                                                                                                                                                                                                                                                                                                                                                    |
| EPI_ISL_9233993, EPI_ISL_9234068, EPI_ISL_9234069,                                                                                                                                                                                                                                                                                                                  | see above                                 | Unipath Speciality Laboaraoty, Ahmedabad                                                        | Gujarat Biotechnology Research Centre Akhilesh Modi; Apurvashin Puvar; Bhadrashsinh Gohil; Chaitanya Joshi; Disha Vora; Janvi Raval; Jaykumar Rangani; Jwalant Shah; Madhvi Joshi; Nimesh Patel; Nitin Savaliya; Nitin Shukla; NitinShukla; Priyank Chavda; Ramesh Pandit; Roshani Mishra; Sonal Sharma; Tasnim Trivedi; Zarna Patel                                                                                                                                                                                                                                                                                                                                                                                                                                                                                                                                                                                                                                                                                                                                                                                                                                                                                                                                                                                                                                                                                                                                                                                                                                                                                                                                                                           |

|                                                                                                                                                                                                                                                                                                                                                                                                                                                                                                                                                                                                                                                                      |                                                                                                                                  |                                                                                                                                                                                                                    |                                                                                                                                                                                                                                                                                                                                                                                                                                                                                                                                                                                                                                                                                                                                                                                                                                                                                                                                                                                                 |
|----------------------------------------------------------------------------------------------------------------------------------------------------------------------------------------------------------------------------------------------------------------------------------------------------------------------------------------------------------------------------------------------------------------------------------------------------------------------------------------------------------------------------------------------------------------------------------------------------------------------------------------------------------------------|----------------------------------------------------------------------------------------------------------------------------------|--------------------------------------------------------------------------------------------------------------------------------------------------------------------------------------------------------------------|-------------------------------------------------------------------------------------------------------------------------------------------------------------------------------------------------------------------------------------------------------------------------------------------------------------------------------------------------------------------------------------------------------------------------------------------------------------------------------------------------------------------------------------------------------------------------------------------------------------------------------------------------------------------------------------------------------------------------------------------------------------------------------------------------------------------------------------------------------------------------------------------------------------------------------------------------------------------------------------------------|
| EPI_ISL_9402825<br>EPI_ISL_9023157,<br>EPI_ISL_9236164                                                                                                                                                                                                                                                                                                                                                                                                                                                                                                                                                                                                               | Unipeth Pathology Laboratory - Vadodara                                                                                          | Gujarat Biotechnology Research Centre                                                                                                                                                                              | Akhilesh Modi; Apurvashin Puvar; Bhadreshsinh Gohil; Chaitanya Joshi; Disha Vora; Janvi Raval; Jaykumar Rangani; Madhvi Joshi; Nimesh Patel; Nitin Savaliya; Nitin Shukla; NitinShukla; Priyank Chavda; Rakesh Shah; Ramesh Pandit; Roshani Mishra; Sonal Sharma; Tasnim Trivedi; Zarna Patel                                                                                                                                                                                                                                                                                                                                                                                                                                                                                                                                                                                                                                                                                                   |
| EPI_ISL_9234037                                                                                                                                                                                                                                                                                                                                                                                                                                                                                                                                                                                                                                                      | Universal Pathology & Molecular Lab, New Ranip, Ahmedabad                                                                        | Gujarat Biotechnology Research Centre                                                                                                                                                                              | Akhilesh Modi; Apurvashin Puvar; Bhadreshsinh Gohil; Bipin Patel; Chaitanya Joshi; Disha Vora; Janvi Raval; Jaykumar Rangani; Madhvi Joshi; Nimesh Patel; Nitin Savaliya; NitinShukla; Priyank Chavda; Ramesh Pandit; Roshani Mishra; Sonal Sharma; Tasnim Trivedi; Zarna Patel                                                                                                                                                                                                                                                                                                                                                                                                                                                                                                                                                                                                                                                                                                                 |
| EPI_ISL_9264902,<br>EPI_ISL_9286179,<br>EPI_ISL_9286305                                                                                                                                                                                                                                                                                                                                                                                                                                                                                                                                                                                                              | University College London, Great Ormond Street Hospital for Children NHS Foundation Trust, Imperial College Healthcare NHS Trust | COVID-19 Genomics UK (COG-UK) Consortium                                                                                                                                                                           | Charlotte Williams; Helena Tutili; Judith Breuer; Marius Cotic; Mark Kristiansen; Nadua Bayzid; Patricia Dyal; Rachel Williams; Sergi Castellano; Sunando Roy                                                                                                                                                                                                                                                                                                                                                                                                                                                                                                                                                                                                                                                                                                                                                                                                                                   |
| EPI_ISL_9480713,<br>EPI_ISL_9480714                                                                                                                                                                                                                                                                                                                                                                                                                                                                                                                                                                                                                                  | University Hospital of Northern Norway, Department for Microbiology and Infectious Disease Control                               | Norwegian Institute of Public Health, Department of Virology                                                                                                                                                       | Atiya R Ali; Debec Nadia; Engebretsen Serina Beate; Garcia Llorente Ignacio; Hilde Elshaug; Hilde Nordby Falkenhaus; Hilde Vollan; Jon Bråte; Kamilla Heddeland Instefjord; Karoline Bragstad; Kathrine Stene-Johansen; Line Victoria Moen; Marie Paulsen Madsen; Olav Hungnes; Pedersen Benedikte Nevjen; Rasmus Riis Kopperud                                                                                                                                                                                                                                                                                                                                                                                                                                                                                                                                                                                                                                                                 |
| EPI_ISL_8680372,<br>EPI_ISL_8891741,<br>EPI_ISL_8891797                                                                                                                                                                                                                                                                                                                                                                                                                                                                                                                                                                                                              | University Hospitals of Geneva, Laboratory of Virology                                                                           | HUG, Laboratory of Virology and the Health2030 Genome Center                                                                                                                                                       | Aline Mamin; Ana Rita Goncalves; Cedric Howald; Deborah Penet; Francisco Perez; Henri Pegeot; Ioannis Xenarios; Keith Harshman; Laurent Kaiser; Lorenzo Cerutti; Melyssa Elies; Samuel Cordey                                                                                                                                                                                                                                                                                                                                                                                                                                                                                                                                                                                                                                                                                                                                                                                                   |
| EPI_ISL_9621813,<br>EPI_ISL_9621814                                                                                                                                                                                                                                                                                                                                                                                                                                                                                                                                                                                                                                  | University of Witwaterstrand                                                                                                     | CERI, Centre for Epidemic Response and Innovation, Stellenbosch University and KRISP, KZN Research Innovation and Sequencing Platform, UKZN.                                                                       | Anyaneji UJ; Giandhari J; Maharaj A; Moir M; Naicker D; Naidoo Y; Pillay S; San JE; Tegally H; Tshiabula D; Van Wyk S; Wilkinson E; de Oliveira T                                                                                                                                                                                                                                                                                                                                                                                                                                                                                                                                                                                                                                                                                                                                                                                                                                               |
| EPI_ISL_8807361                                                                                                                                                                                                                                                                                                                                                                                                                                                                                                                                                                                                                                                      | UniversitätsSpital Zürich                                                                                                        | Institute of Medical Virology, University of Zurich                                                                                                                                                                | Alexandra Trkola; Annette Audigé; Cyril Shah; Gabriela Ziltener; Guido Bloemberg; Jon Huder; Jürg Böni; Kevin Steiner; Maria Grünberg; Maryam Zaheri; Michael Huber; Riccarda Capaul; Stefan Schmutz; Verena Kufner                                                                                                                                                                                                                                                                                                                                                                                                                                                                                                                                                                                                                                                                                                                                                                             |
| EPI_ISL_9214913,<br>EPI_ISL_9214986                                                                                                                                                                                                                                                                                                                                                                                                                                                                                                                                                                                                                                  | Universitätsklinikum Ulm - Institut für Virologie                                                                                | Robert Koch Institute                                                                                                                                                                                              |                                                                                                                                                                                                                                                                                                                                                                                                                                                                                                                                                                                                                                                                                                                                                                                                                                                                                                                                                                                                 |
| EPI_ISL_8799759                                                                                                                                                                                                                                                                                                                                                                                                                                                                                                                                                                                                                                                      | Uniwersyteckie Centrum Kliniczne                                                                                                 | 1. Tricity SARS-CoV-2 sequencing consortium: University of Gdansk, Medical University of Gdansk, Vaxican Ltd., Invicta Ltd. 2. National Institute of Public Health - National Institute of Hygiene, Warsaw, Poland | Celina Cybulska; Karolina Gackowska; Katarzyna Groth; Katarzyna Zacharczuk; Krystyna Bienkowska Szewczyk; Lukasz Rabalski; Maciej Grzybek; Maciej Kosinski; Magdalena Nowakowska; Marcin Lubocki; Malgorzata Sadkowska-Todys; Tomasz Wolkowicz                                                                                                                                                                                                                                                                                                                                                                                                                                                                                                                                                                                                                                                                                                                                                  |
| EPI_ISL_9323179, EPI_ISL_9323180, EPI_ISL_9323181, EPI_ISL_9323182, EPI_ISL_9323183, EPI_ISL_9323184, EPI_ISL_9323185, EPI_ISL_9323186, EPI_ISL_9323187, EPI_ISL_9323188                                                                                                                                                                                                                                                                                                                                                                                                                                                                                             | see above                                                                                                                        | Usawg Iloilo City Molecular Laboratory                                                                                                                                                                             | Philippine Genome Center                                                                                                                                                                                                                                                                                                                                                                                                                                                                                                                                                                                                                                                                                                                                                                                                                                                                                                                                                                        |
| EPI_ISL_9375624                                                                                                                                                                                                                                                                                                                                                                                                                                                                                                                                                                                                                                                      | VENKATESHWAR HOSPITAL                                                                                                            | ILBS                                                                                                                                                                                                               | Amit Pandey; Arjun Bhugra; Chhagan Bihari Sharma; Ekta Gupta; Pramod Gautam; Priya Singh; Reshu Agarwal; Shiv Kumar Sarin; Urvinder Kaur; Varun Suroliya                                                                                                                                                                                                                                                                                                                                                                                                                                                                                                                                                                                                                                                                                                                                                                                                                                        |
| EPI_ISL_9201537, EPI_ISL_9201542, EPI_ISL_9201550, EPI_ISL_9201553, EPI_ISL_9201555, EPI_ISL_9201557, EPI_ISL_9201558, EPI_ISL_9201571, EPI_ISL_9201574, EPI_ISL_9201580, EPI_ISL_9401614, EPI_ISL_9401620, EPI_ISL_9401625, EPI_ISL_9401630, EPI_ISL_9401631, EPI_ISL_9401632, EPI_ISL_9401634, EPI_ISL_9401635, EPI_ISL_9401636, EPI_ISL_9401638, EPI_ISL_9401645, EPI_ISL_9401646, EPI_ISL_9401648, EPI_ISL_9401652, EPI_ISL_9401653, EPI_ISL_9401656, EPI_ISL_9401658, EPI_ISL_9401661, EPI_ISL_9401662, EPI_ISL_9401679, EPI_ISL_9402071, EPI_ISL_9402072, EPI_ISL_9402079, EPI_ISL_9402084, EPI_ISL_9402106, EPI_ISL_9402109, EPI_ISL_9402110, EPI_ISL_9402117 | see above                                                                                                                        | VERMAAK<br>National Institute for Communicable Diseases of the National Health Laboratory Service                                                                                                                  |                                                                                                                                                                                                                                                                                                                                                                                                                                                                                                                                                                                                                                                                                                                                                                                                                                                                                                                                                                                                 |
| EPI_ISL_8801366                                                                                                                                                                                                                                                                                                                                                                                                                                                                                                                                                                                                                                                      | VRDL,GMC,PTA                                                                                                                     | NIV Influenza                                                                                                                                                                                                      | Dr.Rupinder Bakshi                                                                                                                                                                                                                                                                                                                                                                                                                                                                                                                                                                                                                                                                                                                                                                                                                                                                                                                                                                              |
| EPI_ISL_9649929                                                                                                                                                                                                                                                                                                                                                                                                                                                                                                                                                                                                                                                      | Vestfold Hospital, Toensberg, Department of Microbiology                                                                         | Norwegian Institute of Public Health, Department of Virology                                                                                                                                                       | Atiya R Ali; Debec Nadia; Engebretsen Serina Beate; Garcia Llorente Ignacio; Hilde Elshaug; Hilde Nordby Falkenhaus; Hilde Vollan; Jon Bråte; Kamilla Heddeland Instefjord; Karoline Bragstad; Kathrine Stene-Johansen; Line Victoria Moen; Marie Paulsen Madsen; Olav Hungnes; Pedersen Benedikte Nevjen; Rasmus Riis Kopperud                                                                                                                                                                                                                                                                                                                                                                                                                                                                                                                                                                                                                                                                 |
| EPI_ISL_9323318, EPI_ISL_9323319, EPI_ISL_9323320, EPI_ISL_9323323, EPI_ISL_9323416, EPI_ISL_9323417, EPI_ISL_9323418, EPI_ISL_9323419, EPI_ISL_9323420, EPI_ISL_9323421, EPI_ISL_9323423                                                                                                                                                                                                                                                                                                                                                                                                                                                                            | see above                                                                                                                        | Vicente Sotto Memorial Medical Center (VSMCC)                                                                                                                                                                      | Philippine Genome Center                                                                                                                                                                                                                                                                                                                                                                                                                                                                                                                                                                                                                                                                                                                                                                                                                                                                                                                                                                        |
| EPI_ISL_9402384                                                                                                                                                                                                                                                                                                                                                                                                                                                                                                                                                                                                                                                      | Virology Department, Royal Infirmary of Edinburgh, NHS Lothian / School of Biological Sciences, University of Edinburgh          | COVID-19 Genomics UK (COG-UK) Consortium                                                                                                                                                                           | Colquhoun R; Cotton S; Dewar R; Fernandez G; Gallagher A; Hill V; Jackson B; Maloney D; McCrone JT; McHugh M; O'Toole A; Rambaut A; Scher E; Templeton K; Yu X                                                                                                                                                                                                                                                                                                                                                                                                                                                                                                                                                                                                                                                                                                                                                                                                                                  |
| EPI_ISL_9588358                                                                                                                                                                                                                                                                                                                                                                                                                                                                                                                                                                                                                                                      | Virology Laboratory, International Centre for Diarrhoeal Disease Research, Bangladesh (ICDDR,B)                                  | Virology Laboratory, International Centre for Diarrhoeal Disease Research, Bangladesh (ICDDR,B)                                                                                                                    | ASM Alamgir; Ahmed Nawsher Alam; Dinesh Mondal; Firdausi Qadri; Hassan Afrad; Mahbubur Rahman; Manjur Hossain Khan; Md. Mahfuzur Rahman; Mohammad Enayet Hossain; Mohammad Jubair; Mohammad Shahidul Islam; Mohammed Ziaur Rahman; Mojnu Miah; Mustafizur Rahman; Rashedul Hasan; Razib Mazumder; Samir Kumar Saha; Senjuti Saha; Tahmina Shirin                                                                                                                                                                                                                                                                                                                                                                                                                                                                                                                                                                                                                                                |
| EPI_ISL_8841176,<br>EPI_ISL_8841177,<br>EPI_ISL_8841178                                                                                                                                                                                                                                                                                                                                                                                                                                                                                                                                                                                                              | Virology Unit, Institut Pasteur du Cambodge                                                                                      | Virology Unit, Institut Pasteur du Cambodge                                                                                                                                                                        | Cecile Troupin; Chau Darapeak; Chin Savuth; Erik A Karlsson; Jurre Y Siegers; Kraing Sidonn; Leakhena Pum; Ly Sovann; Sophoannedeth Rath; Veasna Duong; Yi Sengdoeurn                                                                                                                                                                                                                                                                                                                                                                                                                                                                                                                                                                                                                                                                                                                                                                                                                           |
| EPI_ISL_8981631                                                                                                                                                                                                                                                                                                                                                                                                                                                                                                                                                                                                                                                      | Virology, Universitätsklinikum des Saarlandes                                                                                    | Epigenetics, Saarland University                                                                                                                                                                                   | Barbara Berko-Göttel Sascha Tierling; Jörn Walter; Kathrin Kattler; Nastasia Seiwert; Sigrun Smola; Thorsten Pfuhl                                                                                                                                                                                                                                                                                                                                                                                                                                                                                                                                                                                                                                                                                                                                                                                                                                                                              |
| EPI_ISL_9323203                                                                                                                                                                                                                                                                                                                                                                                                                                                                                                                                                                                                                                                      | Vitalab Molecular Laboratory                                                                                                     | Philippine Genome Center                                                                                                                                                                                           | Alethea R. de Guzman; Alyssa Joyce E. Telles; Angelica A. Garcia; Anna Ong-Lim; Benedict A. Maralit; Carlo M. Lapid; Celia Carlos; Cynthia P. Saloma; Devon Ray Pacial; Diomedes A. Cariño; Edsel Maurice Salvana; El King D. Morado; Elicid Aaron R. Pangilinan; Eva Maria Cutiongco-de la Paz; Francis A. Tablizo; Henrietta Marie Rodriguez; Jaime C. Montoya; Jan Michael C. Yap; Jarvin E. Nipales; Jo-Hannah S. Llames; John Michael Egana; John Q. Wong; Johnny A. Ong; Joshua Gregor A. Dizon; Joshua Jose Endozo; Karol Sophia Agape R. Padilla; Kris P. Punayan; Kristina Patriz Dela Cruz; Lindsay Clare D.L. Carandang; Ma. Exanil Plantig; Marc Edsel C. Ayes; Maria Rosario Singh-Vergeire; Maria Sofia L. Yangzon; Marielle M. Gamboa; Marissa Alejandria; Niña Francesca Bustamante; Razel Nikka M. Hao; Renato Jacinto Q. Mantaring; Rianna Patricia S. Cruz; Razel A. Medina; Shiela Mae M. Araiza; Yvonne Valerie Austria; Zipporah Mariebelle R. Enriquez; Zyre V. Mollejon |
| EPI_ISL_9141850                                                                                                                                                                                                                                                                                                                                                                                                                                                                                                                                                                                                                                                      | WHO National Influenza Centre Russian Federation                                                                                 | WHO National Influenza Centre Russian Federation                                                                                                                                                                   | Andrey Komissarov; Artem Fadeev; Daria Danilenko; Dmitry Lioznov; Elena Nabieva; Georgij Bazykin; Kirill Varchenko; Kseniya Safina; Kseniya Komissarova; Maria Pisareva; Mikhail Bakaev; Nikita Yolshin; Oula Mansour; Tamila Musaeva; Veronika Eder                                                                                                                                                                                                                                                                                                                                                                                                                                                                                                                                                                                                                                                                                                                                            |
| EPI_ISL_8753986                                                                                                                                                                                                                                                                                                                                                                                                                                                                                                                                                                                                                                                      | WSSE w Olsztynie                                                                                                                 | Wojewodzka Stacja Sanitarno-Epidemiologiczna w Olsztynie, Laboratorium Badań Epidemiologiczno-Klinicznych                                                                                                          | Aleksandra Kobiatko; Barbara Dolinska; Emilia Tarabasz; Ewa Liszewska; Marta Lukian; Monika Czerminska; Patryk Bielecki; Paulina Rozycka; Sylwia Kretzowska; Tomasz Jakubczak                                                                                                                                                                                                                                                                                                                                                                                                                                                                                                                                                                                                                                                                                                                                                                                                                   |
| EPI_ISL_8808430                                                                                                                                                                                                                                                                                                                                                                                                                                                                                                                                                                                                                                                      | WSSE w Szczecinie - laboratorium                                                                                                 | Wojewodzka Stacja Sanitarno-Epidemiologiczna w Gorzowie Wielkopolskim                                                                                                                                              | Elzbieta Justynska; Klaudia Kobendza-Wlodarczak; Patrycja Faberska; Patrycja Rakowska and Marek Margol; Renata Siegel                                                                                                                                                                                                                                                                                                                                                                                                                                                                                                                                                                                                                                                                                                                                                                                                                                                                           |
| EPI_ISL_8992066                                                                                                                                                                                                                                                                                                                                                                                                                                                                                                                                                                                                                                                      | Washington State Department of Health Public Health Laboratories                                                                 | Washington State Department of Health Public Health Laboratories                                                                                                                                                   | Alex Latham; Ardizon Valdez; Avi Singh; Claire Howell; Denny Russell; Drew MacKellar; Holly Halstead; JohnAric Peterson; Kathryn Sickles; Kristin Roche; Lisa Jones; Philip Dykema; Rebecca Cao                                                                                                                                                                                                                                                                                                                                                                                                                                                                                                                                                                                                                                                                                                                                                                                                 |
| EPI_ISL_9234070,<br>EPI_ISL_9234071,<br>EPI_ISL_9402832                                                                                                                                                                                                                                                                                                                                                                                                                                                                                                                                                                                                              | We Path Genexpore Laboratory, Vadodara                                                                                           | Gujarat Biotechnology Research Centre                                                                                                                                                                              | Akhilesh Modi; Apurvashin Puvar; Bhadreshsinh Gohil; Chaitanya Joshi; Disha Vora; Janvi Raval; Jaykumar Rangani; Madhvi Joshi; Nimesh Patel; Nitin Savaliya; Nitin Shukla; NitinShukla; Priyank Chavda; Ramesh Pandit; Roshani Mishra; Sonal Sharma; Tasnim Trivedi; Twinkle Dhamecha; Zarna Patel                                                                                                                                                                                                                                                                                                                                                                                                                                                                                                                                                                                                                                                                                              |
| EPI_ISL_9514520,<br>EPI_ISL_9515125,<br>EPI_ISL_9515126                                                                                                                                                                                                                                                                                                                                                                                                                                                                                                                                                                                                              | West of Scotland Specialist Virology Centre, NHSGGC / MRC-University of Glasgow Centre for Virus Research                        | COVID-19 Genomics UK (COG-UK) Consortium                                                                                                                                                                           | Alasdair MacLean; Ana da Silva Filipe; Andy Young; Antonia Ho; Daniel Mair; David L Robertson; Emily Goldstein; Emma Thomson; Gonzalo Yebra; Guy Mollett; Ioulia Tsatsani; James Shepherd; Jenna Nichols; Jessica Benkaroun; Jon Perkins; Jordan Ashworth; Joseph Hughes; Kathy Smollett; Kirsty Mangin; Kyriaki Nomikou; Lily Tong; Matthew Holden; Nicolas Suarez; Rachael Tomb; Rachel Blacow; Richard Orton; Rory Gunson; Sarah McDonald; Sharif Shaaban; Sreenu Vattipally                                                                                                                                                                                                                                                                                                                                                                                                                                                                                                                 |
| EPI_ISL_9323171,<br>EPI_ISL_9323172,<br>EPI_ISL_9323173,<br>EPI_ISL_9323174,<br>EPI_ISL_9323175                                                                                                                                                                                                                                                                                                                                                                                                                                                                                                                                                                      | Western Visayas Medical Center                                                                                                   | Philippine Genome Center                                                                                                                                                                                           | Alethea R. de Guzman; Alyssa Joyce E. Telles; Angelica A. Garcia; Anna Ong-Lim; Benedict A. Maralit; Carlo M. Lapid; Celia Carlos; Cynthia P. Saloma; Devon Ray Pacial; Diomedes A. Cariño; Edsel Maurice Salvana; El King D. Morado; Elicid Aaron R. Pangilinan; Eva Maria Cutiongco-de la Paz; Francis A. Tablizo; Henrietta Marie Rodriguez; Jaime C. Montoya; Jan Michael C. Yap; Jarvin E. Nipales; Jo-Hannah S. Llames; John Michael Egana; John Q. Wong; Johnny A. Ong; Joshua Gregor A. Dizon; Joshua Jose Endozo; Karol Sophia Agape R. Padilla; Kris P. Punayan; Kristina Patriz Dela Cruz; Lindsay Clare D.L. Carandang; Ma. Exanil Plantig; Marc Edsel C. Ayes; Maria Rosario Singh-Vergeire; Maria Sofia L. Yangzon; Marielle M. Gamboa; Marissa Alejandria; Niña Francesca Bustamante; Razel Nikka M. Hao; Renato Jacinto Q. Mantaring; Rianna Patricia S. Cruz; Razel A. Medina; Shiela Mae M. Araiza; Yvonne Valerie Austria; Zipporah Mariebelle R. Enriquez; Zyre V. Mollejon |
| EPI_ISL_9084301                                                                                                                                                                                                                                                                                                                                                                                                                                                                                                                                                                                                                                                      | Yale Clinical Virology Lab                                                                                                       | Grubaugh Lab - Yale School of Public Health                                                                                                                                                                        | Bony De Kumar; Chaney Kalinich; Chantal Vogels; Christopher Castaldi; David Ferguson; David Peaper; Irina Tikhonova; Kendall Billig; Kien Pham; Mallery Breban; Marie L. Landry; Nathan Grubaugh; Nicholas Kerantzas; Rebecca Earnest; Tobias Koch; Wade Schulz                                                                                                                                                                                                                                                                                                                                                                                                                                                                                                                                                                                                                                                                                                                                 |
| EPI_ISL_8975529                                                                                                                                                                                                                                                                                                                                                                                                                                                                                                                                                                                                                                                      | Zakład Diagnostyki Laboratoryjnej Mazowiecki Szpital Bródnowski Sp. z o.o. ul. Kondratowicza 8, 03-242 Warszawa                  | 1. Academic Center for Pathomorphological and Genetic-Molecular Diagnostics Ltd, Białystok, Poland 2. National Institute of Public Health - National Institute of Hygiene, Warsaw, Poland                          | Anetta Sulewska; Jacek Nikiński; Janusz Dzieciół; Joanna Kisłuk; Katarzyna Zacharczuk; Konrad Raczkowski; Magdalena Nowakowska; Malgorzata Sadkowska-Todys; Piotr Karabowicz; Piotr Majewski; Przemyslaw Bieчек. Joanna Reszeć; Radoslaw Charkiewicz; Tomasz Wolkowicz                                                                                                                                                                                                                                                                                                                                                                                                                                                                                                                                                                                                                                                                                                                          |
| EPI_ISL_9384252                                                                                                                                                                                                                                                                                                                                                                                                                                                                                                                                                                                                                                                      | Zavod za javno zdravstvo Osječko-Baranjske županije                                                                              | Hrvatski zavod za javno zdravstvo                                                                                                                                                                                  | Anita Jurić; Dragan Jurić; Irena Tabain; Ivana Ferenčak; Josipa Kuzle                                                                                                                                                                                                                                                                                                                                                                                                                                                                                                                                                                                                                                                                                                                                                                                                                                                                                                                           |

|                                                                             |                                                |                                                                                        |                                                                                                                                                                                                                                                                                                  |
|-----------------------------------------------------------------------------|------------------------------------------------|----------------------------------------------------------------------------------------|--------------------------------------------------------------------------------------------------------------------------------------------------------------------------------------------------------------------------------------------------------------------------------------------------|
| EPI_ISL_8885406,<br>EPI_ISL_9234039,<br>EPI_ISL_9234040,<br>EPI_ISL_9402809 | Zydus Hospital & Healthcare Research Pvt. Ltd. | Gujarat Biotechnology Research Centre                                                  | Akhilesh Modi; Apurvasinh Puvar; Bhadreshsinh Gohil; Chaitanya Joshi; Disha Vora; Janvi Raval; Jayesh Trivedi; Jaykumar Rangani; Jaymin Patel; Madhvi Joshi; Nimesh Patel; Nitin Savaliya; NitinShukla; Priyank Chavda; Ramesh Pandit; Roshani Mishra; Sonal Sharma; Tasnim Trivedi; Zarna Patel |
| EPI_ISL_9224868,<br>EPI_ISL_9225478                                         | amedes MVZ DIAMEDIS Sennestadt                 | Robert Koch Institute                                                                  |                                                                                                                                                                                                                                                                                                  |
| EPI_ISL_9214215                                                             | amedes MVZ Hannover                            | Robert Koch Institute                                                                  |                                                                                                                                                                                                                                                                                                  |
| EPI_ISL_9211866,<br>EPI_ISL_9211895,<br>EPI_ISL_9211906,<br>EPI_ISL_9211908 | labopart - Medizinische Laboratorien Dresden   | Robert Koch Institute                                                                  |                                                                                                                                                                                                                                                                                                  |
| EPI_ISL_9693061                                                             | unknown                                        | National Institute for Communicable Diseases of the National Health Laboratory Service | Amoako DG; Bhiman JN; Everatt J; Ismail A; Kekana D; Mahlangu B; Maphalala G; Mnguni A; Mohale T; Ntuli N; Scheepers C; Wolter N                                                                                                                                                                 |

We gratefully acknowledge the following Authors from the Originating laboratories responsible for obtaining the specimens, as well as the Submitting laboratories where the genome data were generated and shared via GISAID, on which this research is based.

All Submitters of data may be contacted directly via [www.gisaid.org](http://www.gisaid.org)

Authors are sorted alphabetically.

| Accession ID                                                                                                                                                                                                                                                                                                                                                                                                                                                                                                                                                                                                                                                                                                                                                                                                                                                                                                                                                                                                                                                                                                                                                                                                                                                                                                                                                                                  | Originating Laboratory                                                                   | Submitting Laboratory                                                                                                                                    | Authors                                                                                                                                                                                                                                                                                                                                                                                                                                                                |
|-----------------------------------------------------------------------------------------------------------------------------------------------------------------------------------------------------------------------------------------------------------------------------------------------------------------------------------------------------------------------------------------------------------------------------------------------------------------------------------------------------------------------------------------------------------------------------------------------------------------------------------------------------------------------------------------------------------------------------------------------------------------------------------------------------------------------------------------------------------------------------------------------------------------------------------------------------------------------------------------------------------------------------------------------------------------------------------------------------------------------------------------------------------------------------------------------------------------------------------------------------------------------------------------------------------------------------------------------------------------------------------------------|------------------------------------------------------------------------------------------|----------------------------------------------------------------------------------------------------------------------------------------------------------|------------------------------------------------------------------------------------------------------------------------------------------------------------------------------------------------------------------------------------------------------------------------------------------------------------------------------------------------------------------------------------------------------------------------------------------------------------------------|
| EPI_ISL_8768520,<br>EPI_ISL_8768540,<br>EPI_ISL_8768545,<br>EPI_ISL_8768564,<br>EPI_ISL_8768567                                                                                                                                                                                                                                                                                                                                                                                                                                                                                                                                                                                                                                                                                                                                                                                                                                                                                                                                                                                                                                                                                                                                                                                                                                                                                               | ACT Pathology                                                                            | Schwessinger Lab                                                                                                                                         | Abigail Graetz; Ashley Jones; Austin Bird; Bayantes Dagvadorj; Benjamin Schwessinger; Carl McCombe; Catalina Barragán Quintero; Craig Kennedy; Elise Kellett; Evie Hodgson; Gabrielle Smith; Karina Kennedy; Makenna Short; Rachel Leonard; Rene Riedelbauch; Rita Tam; Robyn Hall; Salome Wilson; Scott Ferguson                                                                                                                                                      |
| EPI_ISL_9744292                                                                                                                                                                                                                                                                                                                                                                                                                                                                                                                                                                                                                                                                                                                                                                                                                                                                                                                                                                                                                                                                                                                                                                                                                                                                                                                                                                               | ADVENTIST HOSPITAL- SANTIAGO CITY INC.                                                   | Research Institute for Tropical Medicine                                                                                                                 | Alexander Sadiasa; Anne Pauline A. Alpino; Ardiane Ysabelle M. Dolor; Catalino S. Demetria; Criselda T. Bautista; Francisco Gerardo M. Polotan; Jefferson Earl J. Halog; Joseph Hughes; Kirstyn Brunker; Lei Lanna M. Dancel; Ma. Angelica A. Tujan; Mayan Uy-Lumandas; Othoniel Jan T. Onza; Simon Daldry; Timothy John R. Dizon; Vina Lea F. Arguelles; Yao-Tsun Li                                                                                                  |
| EPI_ISL_9744293                                                                                                                                                                                                                                                                                                                                                                                                                                                                                                                                                                                                                                                                                                                                                                                                                                                                                                                                                                                                                                                                                                                                                                                                                                                                                                                                                                               | AGLIPAY RURAL HEALTH UNIT                                                                | Research Institute for Tropical Medicine                                                                                                                 | Alexander Sadiasa; Anne Pauline A. Alpino; Ardiane Ysabelle M. Dolor; Catalino S. Demetria; Criselda T. Bautista; Francisco Gerardo M. Polotan; Jefferson Earl J. Halog; Joseph Hughes; Kirstyn Brunker; Lei Lanna M. Dancel; Ma. Angelica A. Tujan; Mayan Uy-Lumandas; Othoniel Jan T. Onza; Simon Daldry; Timothy John R. Dizon; Vina Lea F. Arguelles; Yao-Tsun Li                                                                                                  |
| EPI_ISL_9670409                                                                                                                                                                                                                                                                                                                                                                                                                                                                                                                                                                                                                                                                                                                                                                                                                                                                                                                                                                                                                                                                                                                                                                                                                                                                                                                                                                               | AZ St.Jan Brugge-Oostende                                                                | AZ St.Jan Brugge-Oostende                                                                                                                                | Jorn Hellemans; Marie Madeleine Chabert-Consen; Marijke Reynders; Sofie Mahboob                                                                                                                                                                                                                                                                                                                                                                                        |
| EPI_ISL_8788108, EPI_ISL_8788156, EPI_ISL_8790160, EPI_ISL_8790150, EPI_ISL_8790162, EPI_ISL_8790163, EPI_ISL_8790180, EPI_ISL_8874684, EPI_ISL_8874685, EPI_ISL_8874709, EPI_ISL_8874722, EPI_ISL_8874758, EPI_ISL_9144851                                                                                                                                                                                                                                                                                                                                                                                                                                                                                                                                                                                                                                                                                                                                                                                                                                                                                                                                                                                                                                                                                                                                                                   | AZDelta                                                                                  | AZ Delta Medical Laboratories in Roeselare, Belgium                                                                                                      | Dieter De Smet; Frederik Van Hoecke; Geert Martens; on behalf of AZ Delta COVID-19 Genomics core (member of Genomic surveillance of SARS-CoV-2 in Belgium network)                                                                                                                                                                                                                                                                                                     |
| EPI_ISL_9334190,<br>EPI_ISL_9486019,<br>EPI_ISL_9486247                                                                                                                                                                                                                                                                                                                                                                                                                                                                                                                                                                                                                                                                                                                                                                                                                                                                                                                                                                                                                                                                                                                                                                                                                                                                                                                                       | Aegis Sciences Corporation                                                               | Centers for Disease Control and Prevention Division of Viral Diseases, Pathogen Discovery                                                                | Alec Vest; Benjamin Rambo-Martin; Christopher Gulvick; Clinton Paden; Cyndi Clark; Dakota Howard; Dhvani Batra; Dillon Nall; Duncan MacCannell; Erisa Sula; Ethan Sanders; Holly Houdeshell; Jason Caravas; Kristine Lacek; Matthew Hardison; Matthew Schmerer; Ola Kvalvaag; Patrick Campbell; Peter Cook; Rob Case; Scott Sammons; Shatavia Morrison; Shaun Westlund; Tymecia Kendall; Victoria Caban Figueroa; Vikramsinha Ghopade; Yvette Unoarumhi                |
| EPI_ISL_9626119,<br>EPI_ISL_9626303,<br>EPI_ISL_9626306,<br>EPI_ISL_9626308,<br>EPI_ISL_9626310                                                                                                                                                                                                                                                                                                                                                                                                                                                                                                                                                                                                                                                                                                                                                                                                                                                                                                                                                                                                                                                                                                                                                                                                                                                                                               | Akershus University Hospital, Department for Microbiology and Infectious Disease Control | Norwegian Institute of Public Health, Department of Virology                                                                                             | Atiya R Ali; Debec Nadia; Engebretsen Serina Beate; Garcia Llorente Ignacio; Hilde Elshaug; Hilde Nordby Falkenhau; Hilde Vollan; Jon Bråte; Kamilla Heddeland Instefjord; Karoline Bragstad; Kathrine Stene-Johansen; Line Victoria Moen; Marie Paulsen Madsen; Olav Hungnes; Pedersen Benedikte Nevjen; Rasmus Riis Kopperud                                                                                                                                         |
| EPI_ISL_9488206,<br>EPI_ISL_9488412,<br>EPI_ISL_9674513                                                                                                                                                                                                                                                                                                                                                                                                                                                                                                                                                                                                                                                                                                                                                                                                                                                                                                                                                                                                                                                                                                                                                                                                                                                                                                                                       | Alaska State Virology Laboratory                                                         | Alaska State Virology Laboratory                                                                                                                         | Jack Chen; Jacob Zidek; Jeremy Roe; Lisa Smith; Ph.D.                                                                                                                                                                                                                                                                                                                                                                                                                  |
| EPI_ISL_9394946                                                                                                                                                                                                                                                                                                                                                                                                                                                                                                                                                                                                                                                                                                                                                                                                                                                                                                                                                                                                                                                                                                                                                                                                                                                                                                                                                                               | Algemeen Medisch Labo                                                                    | Labo Klinische Biologie, UZA                                                                                                                             | Basil Britto Xavier; Christine Lammens; Herman Goossens; Ines Verbesselt; Jasmine Coppens; Kathleen Holemans; Marie Le Mercier; Veerle Matheusson                                                                                                                                                                                                                                                                                                                      |
| EPI_ISL_9072156,<br>EPI_ISL_9072157,<br>EPI_ISL_9072158,<br>EPI_ISL_9072159,<br>EPI_ISL_9570768                                                                                                                                                                                                                                                                                                                                                                                                                                                                                                                                                                                                                                                                                                                                                                                                                                                                                                                                                                                                                                                                                                                                                                                                                                                                                               | Allergy, Immunology and Cell Biology Unit (AICBU)                                        | Allergy, Immunology and Cell Biology Unit (AICBU)                                                                                                        | Ayesha Wijesinghe; Chandima Jeewandara; Deshni Jayathilaka; Dinuka Ariyaratne; Diyanath Ranasinghe; Dumni Guasinghe; Farha Bary; Gathsaurie Neelika Malavige; Heshan Kuruppu; Tibutius Thanseth                                                                                                                                                                                                                                                                        |
| EPI_ISL_9610206                                                                                                                                                                                                                                                                                                                                                                                                                                                                                                                                                                                                                                                                                                                                                                                                                                                                                                                                                                                                                                                                                                                                                                                                                                                                                                                                                                               | AmpliGene laboratory, Ahmedabad                                                          | Gujarat Biotechnology Research Centre                                                                                                                    | Akhilesh Modi; Apurvasinh Puvar; Bhadreshsinh Gohil; Chaitanya Joshi; Chirag Pandya; Disha Vora; Janvi Raval; Jaykumar Rangani; Madhvi Joshi; Nimesh Patel; Nitin Savaliya; Nitin Shukla; Priyank Chavda; Ramesh Pandit; Roshani Mishra; Sonal Sharma; Tasnim Trivedi; Zarna Patel                                                                                                                                                                                     |
| EPI_ISL_9403053                                                                                                                                                                                                                                                                                                                                                                                                                                                                                                                                                                                                                                                                                                                                                                                                                                                                                                                                                                                                                                                                                                                                                                                                                                                                                                                                                                               | Apollo Hospital International Limited, Ahmedabad                                         | Gujarat Biotechnology Research Centre                                                                                                                    | Akhilesh Modi; Apurvasinh Puvar; Bhadreshsinh Gohil; Chaitanya Joshi; Disha Vora; Janvi Raval; Jaykumar Rangani; Madhvi Joshi; Nimesh Patel; Nitin Savaliya; Nitin Shukla; Pankti Shah; Priyank Chavda; Ramesh Pandit; Roshani Mishra; Sonal Sharma; Tasnim Trivedi; Zarna Patel                                                                                                                                                                                       |
| EPI_ISL_8764438, EPI_ISL_8764466, EPI_ISL_8764497, EPI_ISL_8764569, EPI_ISL_8764584, EPI_ISL_8989068, EPI_ISL_9152869                                                                                                                                                                                                                                                                                                                                                                                                                                                                                                                                                                                                                                                                                                                                                                                                                                                                                                                                                                                                                                                                                                                                                                                                                                                                         | Arizona State University                                                                 | Arizona State University                                                                                                                                 | Efrem S. Lim; James C. Hu; Joshua LaBaer; LaRinda A. Holland; Matthew F. Smith; Nathaniel Johnson; Regan A. Sullins; Steven C. Holland; Vel Murugan                                                                                                                                                                                                                                                                                                                    |
| EPI_ISL_9459542, EPI_ISL_9626849, EPI_ISL_9626850, EPI_ISL_9626855, EPI_ISL_9626856, EPI_ISL_9626857, EPI_ISL_9626881, EPI_ISL_9626883, EPI_ISL_9626884, EPI_ISL_9626886                                                                                                                                                                                                                                                                                                                                                                                                                                                                                                                                                                                                                                                                                                                                                                                                                                                                                                                                                                                                                                                                                                                                                                                                                      | Austrian Agency for Health and Food Safety (AGES)                                        | Bergthaler laboratory, CeMM Research Center for Molecular Medicine of the Austrian Academy of Sciences                                                   | Andreas Bergthaler; Anna Schedl; Bekir Erguner; Benedikt Agerer; Christoph Bock; Fabian Amman; Jan Laine; Lukas Endler; Martin Senekowitsch; Matthew Thornton; Michael Schuster; Michelle Chan; Petr Triska; Thomas Penz                                                                                                                                                                                                                                               |
| EPI_ISL_8960217                                                                                                                                                                                                                                                                                                                                                                                                                                                                                                                                                                                                                                                                                                                                                                                                                                                                                                                                                                                                                                                                                                                                                                                                                                                                                                                                                                               | Azienda Sanitaria dell'Alto Adige - Laboratorio Aziendale di Microbiologia e Virologia   | Azienda Sanitaria dell'Alto Adige                                                                                                                        | Irene Bianconi                                                                                                                                                                                                                                                                                                                                                                                                                                                         |
| EPI_ISL_9091146, EPI_ISL_9091147, EPI_ISL_9091148, EPI_ISL_9091149, EPI_ISL_9091150, EPI_ISL_9091151, EPI_ISL_9091152, EPI_ISL_9091153, EPI_ISL_9091154, EPI_ISL_9091155, EPI_ISL_9091156, EPI_ISL_9091160, EPI_ISL_9091161, EPI_ISL_9329614, EPI_ISL_9329615, EPI_ISL_9329616, EPI_ISL_9329617, EPI_ISL_9329619, EPI_ISL_9329621, EPI_ISL_9329623, EPI_ISL_9329624, EPI_ISL_9329626, EPI_ISL_9329627, EPI_ISL_9329629, EPI_ISL_9329632, EPI_ISL_9329633, EPI_ISL_9329634, EPI_ISL_9329641, EPI_ISL_9329642, EPI_ISL_9329643, EPI_ISL_9329645, EPI_ISL_9329646, EPI_ISL_9329647, EPI_ISL_9329648, EPI_ISL_9329651, EPI_ISL_9329652, EPI_ISL_9329653, EPI_ISL_9329654, EPI_ISL_9329655, EPI_ISL_9329656, EPI_ISL_9329657, EPI_ISL_9329658, EPI_ISL_9329659, EPI_ISL_9329661, EPI_ISL_9329662, EPI_ISL_9329663, EPI_ISL_9329664, EPI_ISL_9329665, EPI_ISL_9329666, EPI_ISL_9329677, EPI_ISL_9329680, EPI_ISL_9329683, EPI_ISL_9329684, EPI_ISL_9329685, EPI_ISL_9329686, EPI_ISL_9329688, EPI_ISL_9329689, EPI_ISL_9329690, EPI_ISL_9329696, EPI_ISL_9329697, EPI_ISL_9329701, EPI_ISL_9329702, EPI_ISL_9329704, EPI_ISL_9329706, EPI_ISL_9329707, EPI_ISL_9329708, EPI_ISL_9329711, EPI_ISL_9329712, EPI_ISL_9329713, EPI_ISL_9329714, EPI_ISL_9329715, EPI_ISL_9329716, EPI_ISL_9329717, EPI_ISL_9329718, EPI_ISL_9329719, EPI_ISL_9329720, EPI_ISL_9329723, EPI_ISL_9329724, EPI_ISL_9329725 | National Center for Biological Sciences, TIFR - Rockefeller Foundation                   | Awadhesh Pandit; Bhagyashree Madhav Shelar; Darshan Sreenivas; Dimple Notani; Kathirvel Kandasamy; Lakshminarayanan CP; Satyajit Mayor; Uma Ramakrishnan |                                                                                                                                                                                                                                                                                                                                                                                                                                                                        |
| EPI_ISL_9242285                                                                                                                                                                                                                                                                                                                                                                                                                                                                                                                                                                                                                                                                                                                                                                                                                                                                                                                                                                                                                                                                                                                                                                                                                                                                                                                                                                               | BBTKLPP Surabaya                                                                         | Institute of Tropical Disease, Universitas Airlangga                                                                                                     | Aldise M Nastri; Erwin Ashta Triyono; Gatot Soegiarto; Jezzy R Dewantari; Joni Wahyuhadi; Kazufumi Shimizu; Krisnoadi Rahardjo; Laksmi Wulandari; Maria I Lusida; Resti Yudhawati; Rima R Prasetya; Soetjipto; Yasuko Mori                                                                                                                                                                                                                                             |
| EPI_ISL_9023233,<br>EPI_ISL_9023242,<br>EPI_ISL_9023243,<br>EPI_ISL_9604339                                                                                                                                                                                                                                                                                                                                                                                                                                                                                                                                                                                                                                                                                                                                                                                                                                                                                                                                                                                                                                                                                                                                                                                                                                                                                                                   | BJ Medical College, Ahmedabad                                                            | Gujarat Biotechnology Research Centre                                                                                                                    | Akhilesh Modi; Apurvasinh Puvar; Bhadreshsinh Gohil; Chaitanya Joshi; Disha Vora; Janvi Raval; Jaykumar Rangani; Madhvi Joshi; Nimesh Patel; Nitin Savaliya; Nitin Shukla; Priyank Chavda; Ramesh Pandit; Roshani Mishra; Sonal Sharma; Sumita Soni; Tasnim Trivedi; Zarna Patel                                                                                                                                                                                       |
| EPI_ISL_9388265,<br>EPI_ISL_9388288                                                                                                                                                                                                                                                                                                                                                                                                                                                                                                                                                                                                                                                                                                                                                                                                                                                                                                                                                                                                                                                                                                                                                                                                                                                                                                                                                           | BPKIHS                                                                                   | National Public Health Laboratory                                                                                                                        | National Public Health Laboratory Team                                                                                                                                                                                                                                                                                                                                                                                                                                 |
| EPI_ISL_9338361,<br>EPI_ISL_9338364                                                                                                                                                                                                                                                                                                                                                                                                                                                                                                                                                                                                                                                                                                                                                                                                                                                                                                                                                                                                                                                                                                                                                                                                                                                                                                                                                           | Bashkortostan Republican Clinical Hospital No 2                                          | WHO National Influenza Centre Russian Federation                                                                                                         | Andrey Komissarov; Artem Fadeev; Daria Danilenko; Dmitry Lioznov; Elena Nabieva; Georgii Bazykin; Kirill Varchenko; Ksenia Safina; Kseniya Komissarova; Maria Pisareva; Mikhail Bakaev; Nikita Yolshin; Oula Mansour; Tamila Musaeva; Veronika Eder                                                                                                                                                                                                                    |
| EPI_ISL_9071986, EPI_ISL_9366216, EPI_ISL_9366262, EPI_ISL_9366266, EPI_ISL_9648088, EPI_ISL_9648089, EPI_ISL_9648150, EPI_ISL_9648158, EPI_ISL_9648216                                                                                                                                                                                                                                                                                                                                                                                                                                                                                                                                                                                                                                                                                                                                                                                                                                                                                                                                                                                                                                                                                                                                                                                                                                       | Bayerisches Landesamt fuer Gesundheit und Lebensmittelsicherheit (LGL)                   | Bayerisches Landesamt fuer Gesundheit und Lebensmittelsicherheit (LGL)                                                                                   | Alexandra Dangel; Andreas Sing; Annika Sprenger; Carola Berger; Laura Weise; Nikolaus Ackermann; Sabrina Hepner                                                                                                                                                                                                                                                                                                                                                        |
| EPI_ISL_8857920, EPI_ISL_8898385, EPI_ISL_8898582, EPI_ISL_8930667, EPI_ISL_8932076, EPI_ISL_8941481, EPI_ISL_8941711, EPI_ISL_8941779, EPI_ISL_8944158, EPI_ISL_8944254, EPI_ISL_8944302, EPI_ISL_8944341, EPI_ISL_8944428, EPI_ISL_8962165, EPI_ISL_8962191, EPI_ISL_8962233, EPI_ISL_8962560, EPI_ISL_8970544, EPI_ISL_8970573, EPI_ISL_8970605, EPI_ISL_8970620, EPI_ISL_8970665, EPI_ISL_8971106, EPI_ISL_8971169, EPI_ISL_8972760, EPI_ISL_8973108, EPI_ISL_8973146, EPI_ISL_8973836, EPI_ISL_8973846, EPI_ISL_8973937, EPI_ISL_8974083, EPI_ISL_8947100, EPI_ISL_8994064, EPI_ISL_8994074, EPI_ISL_8994154, EPI_ISL_8994224, EPI_ISL_8994237, EPI_ISL_9023793, EPI_ISL_9023927, EPI_ISL_9027004, EPI_ISL_9027383, EPI_ISL_9027554, EPI_ISL_9075821, EPI_ISL_9130266                                                                                                                                                                                                                                                                                                                                                                                                                                                                                                                                                                                                                    | Berkshire and Surrey Pathology Services Lighthouse Laboratory                            | Wellcome Sanger Institute for the COVID-19 Genomics UK (COG-UK) Consortium                                                                               | Berkshire and Surrey Pathology Services Lighthouse Laboratory and Alex Alderton; Cordelia Langford; David K. Jackson; Dominic Kwiatkowski; Ewan Harrison; Ian Johnston; Jeffrey Barrett; John Sillitoe on behalf of the Wellcome Sanger Institute COVID-19 Surveillance Team; Roberto Amato; Sonia Goncalves                                                                                                                                                           |
| EPI_ISL_9786982, EPI_ISL_9786983, EPI_ISL_9786984, EPI_ISL_9786985, EPI_ISL_9786999, EPI_ISL_9787000, EPI_ISL_9787001, EPI_ISL_9787002, EPI_ISL_9787003, EPI_ISL_9787004, EPI_ISL_9787005, EPI_ISL_9787006                                                                                                                                                                                                                                                                                                                                                                                                                                                                                                                                                                                                                                                                                                                                                                                                                                                                                                                                                                                                                                                                                                                                                                                    | Bioscience Labor Wermsdorf                                                               | Robert Koch Institute                                                                                                                                    | Robert Koch Institute                                                                                                                                                                                                                                                                                                                                                                                                                                                  |
| EPI_ISL_9716283                                                                                                                                                                                                                                                                                                                                                                                                                                                                                                                                                                                                                                                                                                                                                                                                                                                                                                                                                                                                                                                                                                                                                                                                                                                                                                                                                                               | Bioscientia Labor Wermsdorf                                                              | Robert Koch Institute                                                                                                                                    | Robert Koch Institute                                                                                                                                                                                                                                                                                                                                                                                                                                                  |
| EPI_ISL_9764028, EPI_ISL_9764076, EPI_ISL_9764095, EPI_ISL_9764203, EPI_ISL_9764206, EPI_ISL_9764207, EPI_ISL_9764260, EPI_ISL_9764541, EPI_ISL_9764787, EPI_ISL_9764931, EPI_ISL_9765024, EPI_ISL_9765096, EPI_ISL_9765099, EPI_ISL_9765706, EPI_ISL_9765707, EPI_ISL_9765837, EPI_ISL_9765846, EPI_ISL_9765870, EPI_ISL_9765879, EPI_ISL_9765925, EPI_ISL_9765979, EPI_ISL_9765989, EPI_ISL_9766333, EPI_ISL_9766343, EPI_ISL_9766419, EPI_ISL_9767030, EPI_ISL_9767040, EPI_ISL_9767049, EPI_ISL_9767055, EPI_ISL_9767092, EPI_ISL_9767111, EPI_ISL_9767155                                                                                                                                                                                                                                                                                                                                                                                                                                                                                                                                                                                                                                                                                                                                                                                                                                | British Columbia Centre For Disease Control                                              | BCCDC Public Health Laboratory                                                                                                                           | Ana Pacagnella; Corrinne Ng; Dan Fornika; James Zlosnic; John Tyson; Kim Macdonald; Kimia Kamelian; Linda Hoang; Loretta Janz; Mel Kraiden; Prystajecy Nataliie; Robert Azana; Shannon Russell                                                                                                                                                                                                                                                                         |
| EPI_ISL_8983321, EPI_ISL_8984024, EPI_ISL_9100856, EPI_ISL_9100931, EPI_ISL_9101764, EPI_ISL_9101779, EPI_ISL_9239247, EPI_ISL_9240986, EPI_ISL_9241620                                                                                                                                                                                                                                                                                                                                                                                                                                                                                                                                                                                                                                                                                                                                                                                                                                                                                                                                                                                                                                                                                                                                                                                                                                       | Broad Institute Clinical Research Sequencing Platform                                    | Infectious Disease Program, Broad Institute of Harvard and MIT                                                                                           | Adams, G.; B.L.; B.W.; Bauer, M.; Birren; Blumenstiel, B.; Brown, K.; Carter, A.; Chaluvari, S.; D.J.; DeFelice, M.; DeRuff, K.; Dodge, S.; Gabriel, S.; Gallagher, G.; Gladden-Young, A.; Granger, B.; J.E.; K.J.; Lagerborg, K.; Larkin, K.; Lee, M.; Lemieux; Lennon, N.; Loreth, C.; Madoff, L.; McGovern, S.; Meldrim, J.; Normandin, E.; P.C.; Park; Pearlman, L.; Reilly, S.; Rudy, M.; Sabeti; Siddle; Smole, S.; Tomkins-Tinch, C.; Vicente, G.; and MacInnis |
| EPI_ISL_9053033                                                                                                                                                                                                                                                                                                                                                                                                                                                                                                                                                                                                                                                                                                                                                                                                                                                                                                                                                                                                                                                                                                                                                                                                                                                                                                                                                                               | CDPH VBL                                                                                 | California Department of Public Health                                                                                                                   | CDPH COVIDNet                                                                                                                                                                                                                                                                                                                                                                                                                                                          |
| EPI_ISL_9210660, EPI_ISL_9210666, EPI_ISL_9210725, EPI_ISL_9210729, EPI_ISL_9210738, EPI_ISL_9210786, EPI_ISL_9210793, EPI_ISL_9210797, EPI_ISL_9210799, EPI_ISL_9210800, EPI_ISL_9210840, EPI_ISL_9210860, EPI_ISL_9210892, EPI_ISL_9210903, EPI_ISL_9210950, EPI_ISL_9210992, EPI_ISL_9211052, EPI_ISL_9211053, EPI_ISL_9211061, EPI_ISL_9211091, EPI_ISL_9211093                                                                                                                                                                                                                                                                                                                                                                                                                                                                                                                                                                                                                                                                                                                                                                                                                                                                                                                                                                                                                           | CENTOGENE Frankfurt Laboratory: Niederlassung Industriepark Höchst                       | Robert Koch Institute                                                                                                                                    |                                                                                                                                                                                                                                                                                                                                                                                                                                                                        |
| EPI_ISL_9550454                                                                                                                                                                                                                                                                                                                                                                                                                                                                                                                                                                                                                                                                                                                                                                                                                                                                                                                                                                                                                                                                                                                                                                                                                                                                                                                                                                               | CERBALLIANCE CHARENTES                                                                   | CERBA HealthCare                                                                                                                                         | Bénédictine Roquebert; Laura Verdurme; Mathilde Roussel; Sabine Trombert; Stéphanie Haim-Boukobza                                                                                                                                                                                                                                                                                                                                                                      |

|                                                                                                                                                                                                                                                                                                                                                                                                                                                                                                                                                                                                                                                                                                                                                                                                                                                                                                                                                                                                                                                                                                                                                                                                                                                                                                                                                                                                                                                                                                                                                                                                                                                                                                                                                                                                                                                                                                                                                                                                                                                                                                                                                                                                                                                                                                                                                                                                                                                                                                                                                |                                                                                                                                             |                                                                                                                                                                                                  |                                                                                                                                                                                                                                                                                                                                                                                                                                                                                                                                                                               |
|------------------------------------------------------------------------------------------------------------------------------------------------------------------------------------------------------------------------------------------------------------------------------------------------------------------------------------------------------------------------------------------------------------------------------------------------------------------------------------------------------------------------------------------------------------------------------------------------------------------------------------------------------------------------------------------------------------------------------------------------------------------------------------------------------------------------------------------------------------------------------------------------------------------------------------------------------------------------------------------------------------------------------------------------------------------------------------------------------------------------------------------------------------------------------------------------------------------------------------------------------------------------------------------------------------------------------------------------------------------------------------------------------------------------------------------------------------------------------------------------------------------------------------------------------------------------------------------------------------------------------------------------------------------------------------------------------------------------------------------------------------------------------------------------------------------------------------------------------------------------------------------------------------------------------------------------------------------------------------------------------------------------------------------------------------------------------------------------------------------------------------------------------------------------------------------------------------------------------------------------------------------------------------------------------------------------------------------------------------------------------------------------------------------------------------------------------------------------------------------------------------------------------------------------|---------------------------------------------------------------------------------------------------------------------------------------------|--------------------------------------------------------------------------------------------------------------------------------------------------------------------------------------------------|-------------------------------------------------------------------------------------------------------------------------------------------------------------------------------------------------------------------------------------------------------------------------------------------------------------------------------------------------------------------------------------------------------------------------------------------------------------------------------------------------------------------------------------------------------------------------------|
| EPI_ISL_9791382                                                                                                                                                                                                                                                                                                                                                                                                                                                                                                                                                                                                                                                                                                                                                                                                                                                                                                                                                                                                                                                                                                                                                                                                                                                                                                                                                                                                                                                                                                                                                                                                                                                                                                                                                                                                                                                                                                                                                                                                                                                                                                                                                                                                                                                                                                                                                                                                                                                                                                                                | CHI Elbeuf                                                                                                                                  | Centre Hospitalier Universitaire de Rouen<br>Laboratoire de Virologie                                                                                                                            | Alice Moisan; Fabienne De Oliveira; Marie Leoz                                                                                                                                                                                                                                                                                                                                                                                                                                                                                                                                |
| EPI_ISL_8936275,<br>EPI_ISL_8936277,<br>EPI_ISL_8936287                                                                                                                                                                                                                                                                                                                                                                                                                                                                                                                                                                                                                                                                                                                                                                                                                                                                                                                                                                                                                                                                                                                                                                                                                                                                                                                                                                                                                                                                                                                                                                                                                                                                                                                                                                                                                                                                                                                                                                                                                                                                                                                                                                                                                                                                                                                                                                                                                                                                                        | CHU UCL Namur, Avenue G. Thérâsse 1, 5530 Yvoir,<br>Belgium                                                                                 | Plateforme de testing Namuroise                                                                                                                                                                  | Degosserie Jonathan; Demars Aurore; Denis Olivier; Gilliard Nicolas; Maschietto Céline; Mullier François; Nobis Chloé; Otto Gaetan; Vermeersch Lauranne                                                                                                                                                                                                                                                                                                                                                                                                                       |
| EPI_ISL_9064941                                                                                                                                                                                                                                                                                                                                                                                                                                                                                                                                                                                                                                                                                                                                                                                                                                                                                                                                                                                                                                                                                                                                                                                                                                                                                                                                                                                                                                                                                                                                                                                                                                                                                                                                                                                                                                                                                                                                                                                                                                                                                                                                                                                                                                                                                                                                                                                                                                                                                                                                | CHUV                                                                                                                                        | Laboratory of genomics and metagenomics,<br>Institute of Microbiology, University Hospital<br>Centre and University of Lausanne                                                                  | Claire Bertelli; Damien Jacot; Gilbert Greub; Sébastien Aeby; Trestan Pillonel                                                                                                                                                                                                                                                                                                                                                                                                                                                                                                |
| EPI_ISL_9549870                                                                                                                                                                                                                                                                                                                                                                                                                                                                                                                                                                                                                                                                                                                                                                                                                                                                                                                                                                                                                                                                                                                                                                                                                                                                                                                                                                                                                                                                                                                                                                                                                                                                                                                                                                                                                                                                                                                                                                                                                                                                                                                                                                                                                                                                                                                                                                                                                                                                                                                                | COVID-CBNAAT; Department of Microbiology; AIIMS<br>New Delhi                                                                                | Genomics Lab; CCRF; AIIMS; New Delhi_INSACOG                                                                                                                                                     | Anwita Mishra; Deepika Bhardwaj; J. Stephenraj; Jawed Ahmed; Jyoti Shukla; Kiran Bala; Lata Kumari; Lata Rani; Madhulika Kabra; Md. Nizam; Rama Chaudhry; Randeep Guleria; Ritu Gupta; Subrata Sinha; Sudesh Gaurav; Sushanta Deb; Urvashi B. Singh; vineet ahuja                                                                                                                                                                                                                                                                                                             |
| EPI_ISL_9729068, EPI_ISL_9729071, EPI_ISL_9729073, EPI_ISL_9729074, EPI_ISL_9729075, EPI_ISL_9729079, EPI_ISL_9729097, EPI_ISL_9729099, EPI_ISL_9729100                                                                                                                                                                                                                                                                                                                                                                                                                                                                                                                                                                                                                                                                                                                                                                                                                                                                                                                                                                                                                                                                                                                                                                                                                                                                                                                                                                                                                                                                                                                                                                                                                                                                                                                                                                                                                                                                                                                                                                                                                                                                                                                                                                                                                                                                                                                                                                                        | see above                                                                                                                                   | CSIR-Centre for Cellular and Molecular Biology<br>CSIR-Centre for Cellular and Molecular Biology                                                                                                 | Amreshwar Vodapalli; Ara Sreenivas; Archana Bharadwaj Siva; B Himasri; Divya Tej Sowpati; Jandhyala Sai Krishna; Karthik Bharadwaj Tallapaka; Lamuk Zaveri; Malini Nemalikanti; Rakesh K Mishra; Shreekant Verma; Sreelekshmi MS; Smedha Avadhanula; Surabhi Srivastava; Tulasi Nagabandi; Valli Nagalakshmi Undamatla; Vidhyadhari Methuku                                                                                                                                                                                                                                   |
| EPI_ISL_9729026,<br>EPI_ISL_9729028,<br>EPI_ISL_9729052,<br>EPI_ISL_9729059,<br>EPI_ISL_9729064,<br>EPI_ISL_9729067                                                                                                                                                                                                                                                                                                                                                                                                                                                                                                                                                                                                                                                                                                                                                                                                                                                                                                                                                                                                                                                                                                                                                                                                                                                                                                                                                                                                                                                                                                                                                                                                                                                                                                                                                                                                                                                                                                                                                                                                                                                                                                                                                                                                                                                                                                                                                                                                                            | CSIR-Centre for Cellular and Molecular Biology                                                                                              | CSIR-Centre for Cellular and Molecular Biology<br>INSACOG                                                                                                                                        | Amreshwar Vodapalli; Ara Sreenivas; Archana Bharadwaj Siva; B Himasri; Divya Tej Sowpati; Jandhyala Sai Krishna; Karthik Bharadwaj Tallapaka; Lamuk Zaveri; Malini Nemalikanti; Rakesh K Mishra; Shreekant Verma; Sreelekshmi MS; Smedha Avadhanula; Surabhi Srivastava; Tulasi Nagabandi; Valli Nagalakshmi Undamatla; Vidhyadhari Methuku                                                                                                                                                                                                                                   |
| EPI_ISL_9352582, EPI_ISL_9352584, EPI_ISL_9352588, EPI_ISL_9352589, EPI_ISL_9352592, EPI_ISL_9352593, EPI_ISL_9352594, EPI_ISL_9352595, EPI_ISL_9352596, EPI_ISL_9352597, EPI_ISL_9352599, EPI_ISL_9352602, EPI_ISL_9352603, EPI_ISL_9352605, EPI_ISL_9352606, EPI_ISL_9352607, EPI_ISL_9352611, EPI_ISL_9352614, EPI_ISL_9352616, EPI_ISL_9352617, EPI_ISL_9352618, EPI_ISL_9352622, EPI_ISL_9352623, EPI_ISL_9352625, EPI_ISL_9352627, EPI_ISL_9352629, EPI_ISL_9352630, EPI_ISL_9352631, EPI_ISL_9352633, EPI_ISL_9352635, EPI_ISL_9352637, EPI_ISL_9352639, EPI_ISL_9352640, EPI_ISL_9352642, EPI_ISL_9352643, EPI_ISL_9352644, EPI_ISL_9352646, EPI_ISL_9352647, EPI_ISL_9352650, EPI_ISL_9352654, EPI_ISL_9352655                                                                                                                                                                                                                                                                                                                                                                                                                                                                                                                                                                                                                                                                                                                                                                                                                                                                                                                                                                                                                                                                                                                                                                                                                                                                                                                                                                                                                                                                                                                                                                                                                                                                                                                                                                                                                        | see above                                                                                                                                   | CSIR-NEERI, Nagpur Covid-19 Testing Lab<br>CSIR-NEERI, Nagpur Covid-19 Testing Lab                                                                                                               | Krishna Khairnar et al.                                                                                                                                                                                                                                                                                                                                                                                                                                                                                                                                                       |
| EPI_ISL_9234844, EPI_ISL_9234845, EPI_ISL_9234846, EPI_ISL_9234847, EPI_ISL_9234848, EPI_ISL_9234850, EPI_ISL_9234852, EPI_ISL_9234853, EPI_ISL_9234855, EPI_ISL_9234856, EPI_ISL_9234857, EPI_ISL_9234859                                                                                                                                                                                                                                                                                                                                                                                                                                                                                                                                                                                                                                                                                                                                                                                                                                                                                                                                                                                                                                                                                                                                                                                                                                                                                                                                                                                                                                                                                                                                                                                                                                                                                                                                                                                                                                                                                                                                                                                                                                                                                                                                                                                                                                                                                                                                     | see above                                                                                                                                   | CSIR-NEIST, JORHAT<br>Centre for Infectious Diseases, CSIR-NEIST                                                                                                                                 | G Narahari Sastry; Gayatri Gogoi; Jatin Kalita; Moirangthem G Singh; Munmi Bora; Pankaj Bharali; Romi Wahengbam; Yasmin B Tapaddar                                                                                                                                                                                                                                                                                                                                                                                                                                            |
| EPI_ISL_9023228,<br>EPI_ISL_9236232,<br>EPI_ISL_9610242                                                                                                                                                                                                                                                                                                                                                                                                                                                                                                                                                                                                                                                                                                                                                                                                                                                                                                                                                                                                                                                                                                                                                                                                                                                                                                                                                                                                                                                                                                                                                                                                                                                                                                                                                                                                                                                                                                                                                                                                                                                                                                                                                                                                                                                                                                                                                                                                                                                                                        | Cellicare Patholab, Ahmedabad                                                                                                               | Gujarat Biotechnology Research Centre                                                                                                                                                            | Akhilesh Modi; Apurvashin Puvar; Bhadrashin Gohil; Chaitanya Joshi; Dhyanesh Desai; Disha Vora; Janvi Raval; Jaykumar Rangani; Madhvi Joshi; Nimesh Patel; Nitin Savaliya; NitinShukla; Priyank Chavda; Ramesh Pandit; Roshani Mishra; Sonal Sharma; Tasnim Trivedi; Zarna Patel; itesh Sudani                                                                                                                                                                                                                                                                                |
| EPI_ISL_9110943                                                                                                                                                                                                                                                                                                                                                                                                                                                                                                                                                                                                                                                                                                                                                                                                                                                                                                                                                                                                                                                                                                                                                                                                                                                                                                                                                                                                                                                                                                                                                                                                                                                                                                                                                                                                                                                                                                                                                                                                                                                                                                                                                                                                                                                                                                                                                                                                                                                                                                                                | Center for Laboratory Medicine                                                                                                              | Center for Laboratory Medicine, ZLMSG                                                                                                                                                            | Yainick Gerth                                                                                                                                                                                                                                                                                                                                                                                                                                                                                                                                                                 |
| EPI_ISL_9459545                                                                                                                                                                                                                                                                                                                                                                                                                                                                                                                                                                                                                                                                                                                                                                                                                                                                                                                                                                                                                                                                                                                                                                                                                                                                                                                                                                                                                                                                                                                                                                                                                                                                                                                                                                                                                                                                                                                                                                                                                                                                                                                                                                                                                                                                                                                                                                                                                                                                                                                                | Center for Virology, Medical University of Vienna                                                                                           | Berghaler laboratory, CeMM Research Center for<br>Molecular Medicine of the Austrian Academy of<br>Sciences                                                                                      | Andreas Berghaler; Anna Schedi; Bekir Erguner; Benedikt Agerer; Christoph Bock; Fabian Amman; Jan Laine; Lukas Endler; Martin Senekowitsch; Matthew Thornton; Michael Schuster; Michelle Chan; Petr Triska; Thomas Penz                                                                                                                                                                                                                                                                                                                                                       |
| EPI_ISL_9392043                                                                                                                                                                                                                                                                                                                                                                                                                                                                                                                                                                                                                                                                                                                                                                                                                                                                                                                                                                                                                                                                                                                                                                                                                                                                                                                                                                                                                                                                                                                                                                                                                                                                                                                                                                                                                                                                                                                                                                                                                                                                                                                                                                                                                                                                                                                                                                                                                                                                                                                                | Central Health Laboratory, Ministry of Health and<br>Wellness                                                                               | Central Health Laboratory, Ministry of Health and<br>Wellness                                                                                                                                    | Chinniah K; Jannoo N; Mathur H; Ramuth M; Sonoo J; Sujeewon C; Ubheeram J Baboo SB                                                                                                                                                                                                                                                                                                                                                                                                                                                                                            |
| EPI_ISL_9517279,<br>EPI_ISL_9517284,<br>EPI_ISL_9517291,<br>EPI_ISL_9517314,<br>EPI_ISL_9517320                                                                                                                                                                                                                                                                                                                                                                                                                                                                                                                                                                                                                                                                                                                                                                                                                                                                                                                                                                                                                                                                                                                                                                                                                                                                                                                                                                                                                                                                                                                                                                                                                                                                                                                                                                                                                                                                                                                                                                                                                                                                                                                                                                                                                                                                                                                                                                                                                                                | Central Public Health Laboratory                                                                                                            | Central Public Health Laboratory                                                                                                                                                                 | Asaad Mahdi Asaad; Dr. Duraid Qasim Al-Sharif; Dr. Hani Mousa Al-Akabi; Dr. Mohammad Issa Mohsin; Dr. Riyadh Al-Hilfi; Dr. Wissam Jasim; Iman Mutashar; Manal Ahmed; Mohammed Mohsin Gaeed                                                                                                                                                                                                                                                                                                                                                                                    |
| EPI_ISL_9512862,<br>EPI_ISL_9512869                                                                                                                                                                                                                                                                                                                                                                                                                                                                                                                                                                                                                                                                                                                                                                                                                                                                                                                                                                                                                                                                                                                                                                                                                                                                                                                                                                                                                                                                                                                                                                                                                                                                                                                                                                                                                                                                                                                                                                                                                                                                                                                                                                                                                                                                                                                                                                                                                                                                                                            | Centralne Laboratorium Ginekologiczno Polozniczego<br>Szpitala Klinicznego Uniwersytetu Medycznego im.<br>Karola Marcinkowskiego w Poznaniu | Wojewodzka Stacja Sanitarno-Epidemiologiczna w<br>Lodzi, Oddzial Laboratoryjny Mikrobiologii i<br>Parazytologii                                                                                  | Agnieszka Karnowska; Aleksandra Krawczyk; Danuta Bartczak; Eilan Terpo; Katarzyna Kosowska; Lucyna Kochanowska; Marta Gawronska; Martyna Matera; Szymon Konkolewski                                                                                                                                                                                                                                                                                                                                                                                                           |
| EPI_ISL_9791234                                                                                                                                                                                                                                                                                                                                                                                                                                                                                                                                                                                                                                                                                                                                                                                                                                                                                                                                                                                                                                                                                                                                                                                                                                                                                                                                                                                                                                                                                                                                                                                                                                                                                                                                                                                                                                                                                                                                                                                                                                                                                                                                                                                                                                                                                                                                                                                                                                                                                                                                | Centre Hospitalier Universitaire de Rouen Laboratoire<br>de Virologie                                                                       | Centre Hospitalier Universitaire de Rouen<br>Laboratoire de Virologie                                                                                                                            | Alice Moisan; Fabienne De Oliveira; Marie Leoz                                                                                                                                                                                                                                                                                                                                                                                                                                                                                                                                |
| EPI_ISL_9212469,<br>EPI_ISL_9212487                                                                                                                                                                                                                                                                                                                                                                                                                                                                                                                                                                                                                                                                                                                                                                                                                                                                                                                                                                                                                                                                                                                                                                                                                                                                                                                                                                                                                                                                                                                                                                                                                                                                                                                                                                                                                                                                                                                                                                                                                                                                                                                                                                                                                                                                                                                                                                                                                                                                                                            | Chemische und Veterinäruntersuchungsamt<br>Münsterland-Emscher-Lippe (CVUA-MEL)                                                             | Robert Koch Institute                                                                                                                                                                            |                                                                                                                                                                                                                                                                                                                                                                                                                                                                                                                                                                               |
| EPI_ISL_9594554,<br>EPI_ISL_9594555,<br>EPI_ISL_9594556,<br>EPI_ISL_9594557,<br>EPI_ISL_9594592                                                                                                                                                                                                                                                                                                                                                                                                                                                                                                                                                                                                                                                                                                                                                                                                                                                                                                                                                                                                                                                                                                                                                                                                                                                                                                                                                                                                                                                                                                                                                                                                                                                                                                                                                                                                                                                                                                                                                                                                                                                                                                                                                                                                                                                                                                                                                                                                                                                | Child Health Research Foundation                                                                                                            | Child Health Research Foundation                                                                                                                                                                 | CHRF Bangladesh Genomics Team                                                                                                                                                                                                                                                                                                                                                                                                                                                                                                                                                 |
| EPI_ISL_9214040,<br>EPI_ISL_9214049                                                                                                                                                                                                                                                                                                                                                                                                                                                                                                                                                                                                                                                                                                                                                                                                                                                                                                                                                                                                                                                                                                                                                                                                                                                                                                                                                                                                                                                                                                                                                                                                                                                                                                                                                                                                                                                                                                                                                                                                                                                                                                                                                                                                                                                                                                                                                                                                                                                                                                            | Clemenshospital - Alexianer Clemenshospital Münster                                                                                         | Robert Koch Institute                                                                                                                                                                            |                                                                                                                                                                                                                                                                                                                                                                                                                                                                                                                                                                               |
| EPI_ISL_9300694,<br>EPI_ISL_9300709,<br>EPI_ISL_9300710                                                                                                                                                                                                                                                                                                                                                                                                                                                                                                                                                                                                                                                                                                                                                                                                                                                                                                                                                                                                                                                                                                                                                                                                                                                                                                                                                                                                                                                                                                                                                                                                                                                                                                                                                                                                                                                                                                                                                                                                                                                                                                                                                                                                                                                                                                                                                                                                                                                                                        | Clinical Emergency County Hospital, Craiova                                                                                                 | Cantacuzino National Military-Medical Institute,<br>Viral Respiratory Infections Laboratory                                                                                                      | Carmen Chericu; Luiza Ustean; Mihaela Mazur; Mihaela Oprea; Nicoleta Paraschiv; Sorin Dinu                                                                                                                                                                                                                                                                                                                                                                                                                                                                                    |
| EPI_ISL_8986785,<br>EPI_ISL_8987077,<br>EPI_ISL_8987658,<br>EPI_ISL_8987680                                                                                                                                                                                                                                                                                                                                                                                                                                                                                                                                                                                                                                                                                                                                                                                                                                                                                                                                                                                                                                                                                                                                                                                                                                                                                                                                                                                                                                                                                                                                                                                                                                                                                                                                                                                                                                                                                                                                                                                                                                                                                                                                                                                                                                                                                                                                                                                                                                                                    | Clinical Microbiology Laboratory, Tel Aviv Sourasky<br>Medical Center                                                                       | Clinical Microbiology Laboratory, Tel Aviv Sourasky<br>Medical Center                                                                                                                            | Alon Ziv; Amos Adler; Goel Morad; Katya Levytskyj; Lior Handler; Matan Slutzkin; Ora Halutz                                                                                                                                                                                                                                                                                                                                                                                                                                                                                   |
| EPI_ISL_9242082, EPI_ISL_9242119, EPI_ISL_9242135, EPI_ISL_9242136, EPI_ISL_9242137, EPI_ISL_9242149, EPI_ISL_9242252, EPI_ISL_9242257, EPI_ISL_9242263, EPI_ISL_9242315, EPI_ISL_9242325, EPI_ISL_9242331, EPI_ISL_9242369, EPI_ISL_9242375, EPI_ISL_9242385, EPI_ISL_9242391, EPI_ISL_9242397, EPI_ISL_9242604, EPI_ISL_9242615, EPI_ISL_9242620, EPI_ISL_9242644, EPI_ISL_9242661, EPI_ISL_9242679, EPI_ISL_9242701, EPI_ISL_9242713, EPI_ISL_9242718, EPI_ISL_9242724, EPI_ISL_9242729, EPI_ISL_9242746, EPI_ISL_9242751, EPI_ISL_9242762, EPI_ISL_9242767, EPI_ISL_9242790, EPI_ISL_9242798, EPI_ISL_9242800, EPI_ISL_9242802, EPI_ISL_9242803, EPI_ISL_9242804, EPI_ISL_9242805, EPI_ISL_9242806, EPI_ISL_9242813, EPI_ISL_9242836, EPI_ISL_9242848, EPI_ISL_9242854, EPI_ISL_9242861, EPI_ISL_9242865, EPI_ISL_9242885, EPI_ISL_9242898, EPI_ISL_9242921, EPI_ISL_9242941, EPI_ISL_9242964, EPI_ISL_9242975, EPI_ISL_9242993, EPI_ISL_9242994, EPI_ISL_9242996, EPI_ISL_9243002, EPI_ISL_9243013, EPI_ISL_9243037, EPI_ISL_9243042, EPI_ISL_9243047, EPI_ISL_9243053, EPI_ISL_9243085, EPI_ISL_9243091, EPI_ISL_9243091, EPI_ISL_9397342, EPI_ISL_9397348, EPI_ISL_9397349, EPI_ISL_9397350, EPI_ISL_9397353, EPI_ISL_9397356, EPI_ISL_9397357, EPI_ISL_9397358, EPI_ISL_9397359, EPI_ISL_9397361                                                                                                                                                                                                                                                                                                                                                                                                                                                                                                                                                                                                                                                                                                                                                                                                                                                                                                                                                                                                                                                                                                                                                                                                                                       | see above                                                                                                                                   | Section for Molecular Diagnostics<br>Björn Hallström; Jonas Björkman                                                                                                                             |                                                                                                                                                                                                                                                                                                                                                                                                                                                                                                                                                                               |
| EPI_ISL_8876054,<br>EPI_ISL_9024878,<br>EPI_ISL_9324756                                                                                                                                                                                                                                                                                                                                                                                                                                                                                                                                                                                                                                                                                                                                                                                                                                                                                                                                                                                                                                                                                                                                                                                                                                                                                                                                                                                                                                                                                                                                                                                                                                                                                                                                                                                                                                                                                                                                                                                                                                                                                                                                                                                                                                                                                                                                                                                                                                                                                        | Clinical Virology                                                                                                                           | Clinical Bacteriology, University Hospital Basel                                                                                                                                                 | Adrian Egli; Alfredo Mari; Fanny Wegner; Hans Hirsch; Helena MB Seth-Smith; Julia Bielicki; Karoline Leuzinger; Manuel Bateggay; Tim Roloff                                                                                                                                                                                                                                                                                                                                                                                                                                   |
| EPI_ISL_9553851,<br>EPI_ISL_9572491                                                                                                                                                                                                                                                                                                                                                                                                                                                                                                                                                                                                                                                                                                                                                                                                                                                                                                                                                                                                                                                                                                                                                                                                                                                                                                                                                                                                                                                                                                                                                                                                                                                                                                                                                                                                                                                                                                                                                                                                                                                                                                                                                                                                                                                                                                                                                                                                                                                                                                            | Colorado Department of Public Health and<br>Environment                                                                                     | Colorado Department of Public Health and<br>Environment                                                                                                                                          | Alexandria Rossheiss; Arianna Smith; Diana Ir; Emily A. Travanty; Laura Bankers; Mandy Waters; Michael Martin; Molly C. Hetherington-Rauth; Shannon R. Matzinger                                                                                                                                                                                                                                                                                                                                                                                                              |
| EPI_ISL_9596153,<br>EPI_ISL_9596154                                                                                                                                                                                                                                                                                                                                                                                                                                                                                                                                                                                                                                                                                                                                                                                                                                                                                                                                                                                                                                                                                                                                                                                                                                                                                                                                                                                                                                                                                                                                                                                                                                                                                                                                                                                                                                                                                                                                                                                                                                                                                                                                                                                                                                                                                                                                                                                                                                                                                                            | Cox's Bazar Medical College, Cox's bazar                                                                                                    | IEDCR-icddr.b                                                                                                                                                                                    | ASM Alamgir; Ahmed Nawsher Alam; Anupam Barua; Awlad Hossain; Dinesh Mondal; Firdausi Qadri; Hassan Afrad; Mahbubur Rahman; Manjur Hossain Khan; Md. Mahfuzur Rahman; Mohammad Enayet Hossain; Mohammad Jubair; Mohammad Shahidul Islam; Mohammed Ziaur Rahman; Mojib Miah; Mustafizur Rahman; Rashedul Alam Shanto; Samir Kumar Saha; Senjuti Saha; Syed Mukhtar Al Sium; Tahmina Shirin                                                                                                                                                                                     |
| EPI_ISL_9518849                                                                                                                                                                                                                                                                                                                                                                                                                                                                                                                                                                                                                                                                                                                                                                                                                                                                                                                                                                                                                                                                                                                                                                                                                                                                                                                                                                                                                                                                                                                                                                                                                                                                                                                                                                                                                                                                                                                                                                                                                                                                                                                                                                                                                                                                                                                                                                                                                                                                                                                                | Curative Labs                                                                                                                               | Curative Labs                                                                                                                                                                                    | Elias L. Salfati; Eugenia Khorosheva; George Way; J. Cesar Ignacio-Espinosa; Janet Chen; Mikhail Hanewich-Hollatz; Nabjot Sandhu; Sophia Quasem; Vladimir Slepnev; Zhiyi Xie                                                                                                                                                                                                                                                                                                                                                                                                  |
| EPI_ISL_9744290                                                                                                                                                                                                                                                                                                                                                                                                                                                                                                                                                                                                                                                                                                                                                                                                                                                                                                                                                                                                                                                                                                                                                                                                                                                                                                                                                                                                                                                                                                                                                                                                                                                                                                                                                                                                                                                                                                                                                                                                                                                                                                                                                                                                                                                                                                                                                                                                                                                                                                                                | DIVINE MERCY WELLNESS CENTER                                                                                                                | Research Institute for Tropical Medicine                                                                                                                                                         | Alexander Sadiasa; Anne Pauline A. Alpino; Ardiâne Ysabelle M. Dolor; Catalino S. Demetria; Criselda T. Bautista; Francisco Gerardo M. Polotan; Jefferson Earl J. Halog; Joseph Hughes; Kirstyn Brunker; Lei Lanna M. Dancel; Ma. Angelica A. Tujan; Mayan Uy-Lumandas; Othoniel Jan T. Onza; Simon Dalry; Timothy John R. Dizon; Vina Lea F. Arqueles; Yao-Tsun Li                                                                                                                                                                                                           |
| EPI_ISL_9234838<br>EPI_ISL_9744291,<br>EPI_ISL_9744294                                                                                                                                                                                                                                                                                                                                                                                                                                                                                                                                                                                                                                                                                                                                                                                                                                                                                                                                                                                                                                                                                                                                                                                                                                                                                                                                                                                                                                                                                                                                                                                                                                                                                                                                                                                                                                                                                                                                                                                                                                                                                                                                                                                                                                                                                                                                                                                                                                                                                         | DMCH, Diphu<br>DUPAX DISTRICT HOSPITAL                                                                                                      | Centre for Infectious Diseases, CSIR-NEIST<br>Research Institute for Tropical Medicine                                                                                                           | G Narahari Sastry; Gayatri Gogoi; Jatin Kalita; Moirangthem G Singh; Munmi Bora; Pankaj Bharali; Romi Wahengbam; Yasmin B Tapaddar<br>Alexander Sadiasa; Anne Pauline A. Alpino; Ardiâne Ysabelle M. Dolor; Catalino S. Demetria; Francisco Gerardo M. Polotan; Jefferson Earl J. Halog; Joseph Hughes; Kirstyn Brunker; Lei Lanna M. Dancel; Ma. Angelica A. Tujan; Mayan Uy-Lumandas; Othoniel Jan T. Onza; Simon Dalry; Timothy John R. Dizon; Vina Lea F. Arqueles; Yao-Tsun Li                                                                                           |
| EPI_ISL_9652311,<br>EPI_ISL_9652312,<br>EPI_ISL_9652313,<br>EPI_ISL_9652314,<br>EPI_ISL_9747169                                                                                                                                                                                                                                                                                                                                                                                                                                                                                                                                                                                                                                                                                                                                                                                                                                                                                                                                                                                                                                                                                                                                                                                                                                                                                                                                                                                                                                                                                                                                                                                                                                                                                                                                                                                                                                                                                                                                                                                                                                                                                                                                                                                                                                                                                                                                                                                                                                                | Department Medical Microbiology, Baerum Hospital,<br>Vestre Viken Health Trust                                                              | Norwegian Institute of Public Health, Department<br>of Virology                                                                                                                                  | Atya R Aii; Debec Nadia; Engebretsen Serina Beate; Garcia Llorente Ignacio; Hilde Elshaug; Hilde Nordby Falkenhaug; Hilde Volian; Jan Bråte; Kamilla Heddeland Iustefjord; Karoline Bragstad; Kathrine Stene-Johansen; Line Victoria Moen; Marie Paulsen Madsen; Olav Hungnes; Pedersen Benedikte Nevjen; Rasmus Riis Kopperud                                                                                                                                                                                                                                                |
| EPI_ISL_9107861, EPI_ISL_9107862, EPI_ISL_9107863, EPI_ISL_9107864, EPI_ISL_9107865, EPI_ISL_9107868, EPI_ISL_9107870, EPI_ISL_9107871, EPI_ISL_9107874, EPI_ISL_9107876, EPI_ISL_9107877, EPI_ISL_9107883, EPI_ISL_9107884, EPI_ISL_9107885, EPI_ISL_9107897, EPI_ISL_9521401                                                                                                                                                                                                                                                                                                                                                                                                                                                                                                                                                                                                                                                                                                                                                                                                                                                                                                                                                                                                                                                                                                                                                                                                                                                                                                                                                                                                                                                                                                                                                                                                                                                                                                                                                                                                                                                                                                                                                                                                                                                                                                                                                                                                                                                                 | see above                                                                                                                                   | Department for Virology, Molecular Biology and<br>Genome Research, R. G. Lugar Center for Public<br>Health Research, National Center for Disease Control<br>and Public Health (NCDC) of Georgia. | Adam Kotorashvili; Amiran Gamkrelidze.; Ana Papkiauri; Ann Machabishvili; Anna Kasradze; Davit Tsaguria; Ekaterine Khmaladze; Ekaterine Zangaladze; Ekaterine Zhghenti; Giorgi Gogoladze; Giorgi Tomashvili; Gvantsa Brachveli; Gvantsa Chanturia; Irma Burjanadze; Ketevan Sidamondize; Khatuna Zakhshvili; Lela Sabadze; Lela Urushadze; Magda Dgebuadze; Maia Alkhashvili; Mariam Zakalashvili; Marine Murtskvaladze; Meri Pantsulaia; Nato Kotaria; Nino Berishvili; Paata Imnadze; Roena Sukhlishvili; Salome Javashvili; Tamar Javashvili; Tata Imnadze; Tea Tvedoradze |
| EPI_ISL_8804066, EPI_ISL_8804080, EPI_ISL_8804089, EPI_ISL_8804097, EPI_ISL_8804100, EPI_ISL_8804100, EPI_ISL_8804130, EPI_ISL_8804137, EPI_ISL_8804141, EPI_ISL_8804159, EPI_ISL_8804180, EPI_ISL_8804183, EPI_ISL_8804210, EPI_ISL_8804214, EPI_ISL_8804226, EPI_ISL_8804238, EPI_ISL_8804242, EPI_ISL_8804244, EPI_ISL_8804268, EPI_ISL_8804286, EPI_ISL_8804297, EPI_ISL_8804305, EPI_ISL_8804319, EPI_ISL_8804332, EPI_ISL_8804363, EPI_ISL_8804371, EPI_ISL_8804373, EPI_ISL_8804383, EPI_ISL_8804408, EPI_ISL_8804438, EPI_ISL_8804448, EPI_ISL_8804461, EPI_ISL_8804461, EPI_ISL_8804613, EPI_ISL_8804615, EPI_ISL_8804616, EPI_ISL_8804619, EPI_ISL_8804621, EPI_ISL_8804629, EPI_ISL_8804640, EPI_ISL_8804678, EPI_ISL_8804703, EPI_ISL_8804707, EPI_ISL_8804728, EPI_ISL_8804754, EPI_ISL_8804841, EPI_ISL_8804885, EPI_ISL_8804914, EPI_ISL_8804921, EPI_ISL_8804937, EPI_ISL_8804952, EPI_ISL_8804952, EPI_ISL_8805003, EPI_ISL_8805005, EPI_ISL_8805016, EPI_ISL_8805025, EPI_ISL_8805032, EPI_ISL_8805034, EPI_ISL_8805043, EPI_ISL_8805066, EPI_ISL_8805070, EPI_ISL_8805110, EPI_ISL_8805112, EPI_ISL_8805131, EPI_ISL_8805141, EPI_ISL_8805143, EPI_ISL_8805154, EPI_ISL_8805173, EPI_ISL_8805181, EPI_ISL_8805186, EPI_ISL_8805230, EPI_ISL_8805237, EPI_ISL_8805239, EPI_ISL_8805288, EPI_ISL_8805355, EPI_ISL_8805365, EPI_ISL_8805368, EPI_ISL_8805391, EPI_ISL_8805413, EPI_ISL_8805423, EPI_ISL_8805425, EPI_ISL_8805431, EPI_ISL_8805466, EPI_ISL_8805480, EPI_ISL_8805480, EPI_ISL_8805489, EPI_ISL_8805517, EPI_ISL_8805528, EPI_ISL_8805578, EPI_ISL_8805594, EPI_ISL_8805709, EPI_ISL_8805738, EPI_ISL_8805742, EPI_ISL_8805744, EPI_ISL_8805816, EPI_ISL_8805826, EPI_ISL_8805831, EPI_ISL_8805898, EPI_ISL_8805908, EPI_ISL_8805911, EPI_ISL_8805923, EPI_ISL_8805926, EPI_ISL_8805929, EPI_ISL_8805931, EPI_ISL_8805944, EPI_ISL_8805946, EPI_ISL_8805962, EPI_ISL_8805971, EPI_ISL_8805978, EPI_ISL_8806035, EPI_ISL_8806046, EPI_ISL_8806047, EPI_ISL_8806061, EPI_ISL_8806099, EPI_ISL_8806102, EPI_ISL_8806105, EPI_ISL_8806106, EPI_ISL_8806107, EPI_ISL_8806116, EPI_ISL_8806120, EPI_ISL_8806127, EPI_ISL_8806132, EPI_ISL_8806138, EPI_ISL_8806151, EPI_ISL_8806239, EPI_ISL_8806245, EPI_ISL_8806285, EPI_ISL_8806290, EPI_ISL_8806300, EPI_ISL_8806306, EPI_ISL_8806324, EPI_ISL_8806330, EPI_ISL_8806331, EPI_ISL_8806332, EPI_ISL_8806344, EPI_ISL_8806345, EPI_ISL_8806347, EPI_ISL_8806353, EPI_ISL_8806358, EPI_ISL_8806363, EPI_ISL_8806366, EPI_ISL_8806390, EPI_ISL_8806391, EPI_ISL_8806396 |                                                                                                                                             |                                                                                                                                                                                                  |                                                                                                                                                                                                                                                                                                                                                                                                                                                                                                                                                                               |

EP1, EP2, EP3, EP4, EP5, EP6, EP7, EP8, EP9, EP10, EP11, EP12, EP13, EP14, EP15, EP16, EP17, EP18, EP19, EP20, EP21, EP22, EP23, EP24, EP25, EP26, EP27, EP28, EP29, EP30, EP31, EP32, EP33, EP34, EP35, EP36, EP37, EP38, EP39, EP40, EP41, EP42, EP43, EP44, EP45, EP46, EP47, EP48, EP49, EP50, EP51, EP52, EP53, EP54, EP55, EP56, EP57, EP58, EP59, EP60, EP61, EP62, EP63, EP64, EP65, EP66, EP67, EP68, EP69, EP70, EP71, EP72, EP73, EP74, EP75, EP76, EP77, EP78, EP79, EP80, EP81, EP82, EP83, EP84, EP85, EP86, EP87, EP88, EP89, EP90, EP91, EP92, EP93, EP94, EP95, EP96, EP97, EP98, EP99, EP100, EP101, EP102, EP103, EP104, EP105, EP106, EP107, EP108, EP109, EP110, EP111, EP112, EP113, EP114, EP115, EP116, EP117, EP118, EP119, EP120, EP121, EP122, EP123, EP124, EP125, EP126, EP127, EP128, EP129, EP130, EP131, EP132, EP133, EP134, EP135, EP136, EP137, EP138, EP139, EP140, EP141, EP142, EP143, EP144, EP145, EP146, EP147, EP148, EP149, EP150, EP151, EP152, EP153, EP154, EP155, EP156, EP157, EP158, EP159, EP160, EP161, EP162, EP163, EP164, EP165, EP166, EP167, EP168, EP169, EP170, EP171, EP172, EP173, EP174, EP175, EP176, EP177, EP178, EP179, EP180, EP181, EP182, EP183, EP184, EP185, EP186, EP187, EP188, EP189, EP190, EP191, EP192, EP193, EP194, EP195, EP196, EP197, EP198, EP199, EP200, EP201, EP202, EP203, EP204, EP205, EP206, EP207, EP208, EP209, EP210, EP211, EP212, EP213, EP214, EP215, EP216, EP217, EP218, EP219, EP220, EP221, EP222, EP223, EP224, EP225, EP226, EP227, EP228, EP229, EP230, EP231, EP232, EP233, EP234, EP235, EP236, EP237, EP238, EP239, EP240, EP241, EP242, EP243, EP244, EP245, EP246, EP247, EP248, EP249, EP250, EP251, EP252, EP253, EP254, EP255, EP256, EP257, EP258, EP259, EP260, EP261, EP262, EP263, EP264, EP265, EP266, EP267, EP268, EP269, EP270, EP271, EP272, EP273, EP274, EP275, EP276, EP277, EP278, EP279, EP280, EP281, EP282, EP283, EP284, EP285, EP286, EP287, EP288, EP289, EP290, EP291, EP292, EP293, EP294, EP295, EP296, EP297, EP298, EP299, EP300, EP301, EP302, EP303, EP304, EP305, EP306, EP307, EP308, EP309, EP310, EP311, EP312, EP313, EP314, EP315, EP316, EP317, EP318, EP319, EP320, EP321, EP322, EP323, EP324, EP325, EP326, EP327, EP328, EP329, EP330, EP331, EP332, EP333, EP334, EP335, EP336, EP337, EP338, EP339, EP340, EP341, EP342, EP343, EP344, EP345, EP346, EP347, EP348, EP349, EP350, EP351, EP352, EP353, EP354, EP355, EP356, EP357, EP358, EP359, EP360, EP361, EP362, EP363, EP364, EP365, EP366, EP367, EP368, EP369, EP370, EP371, EP372, EP373, EP374, EP375, EP376, EP377, EP378, EP379, EP380, EP381, EP382, EP383, EP384, EP385, EP386, EP387, EP388, EP389, EP390, EP391, EP392, EP393, EP394, EP395, EP396, EP397, EP398, EP399, EP400, EP401, EP402, EP403, EP404, EP405, EP406, EP407, EP408, EP409, EP410, EP411, EP412, EP413, EP414, EP415, EP416, EP417, EP418, EP419, EP420, EP421, EP422, EP423, EP424, EP425, EP426, EP427, EP428, EP429, EP430, EP431, EP432, EP433, EP434, EP435, EP436, EP437, EP438, EP439, EP440, EP441, EP442, EP443, EP444, EP445, EP446, EP447, EP448, EP449, EP450, EP451, EP452, EP453, EP454, EP455, EP456, EP457, EP458, EP459, EP460, EP461, EP462, EP463, EP464, EP465, EP466, EP467, EP468, EP469, EP470, EP471, EP472, EP473, EP474, EP475, EP476, EP477, EP478, EP479, EP480, EP481, EP482, EP483, EP484, EP485, EP486, EP487, EP488, EP489, EP490, EP491, EP492, EP493, EP494, EP495, EP496, EP497, EP498, EP499, EP500, EP501, EP502, EP503, EP504, EP505, EP506, EP507, EP508, EP509, EP510, EP511, EP512, EP513, EP514, EP515, EP516, EP517, EP518, EP519, EP520, EP521, EP522, EP523, EP524, EP525, EP526, EP527, EP528, EP529, EP530, EP531, EP532, EP533, EP534, EP535, EP536, EP537, EP538, EP539, EP540, EP541, EP542, EP543, EP544, EP545, EP546, EP547, EP548, EP549, EP550, EP551, EP552, EP553, EP554, EP555, EP556, EP557, EP558, EP559, EP560, EP561, EP562, EP563, EP564, EP565, EP566, EP567, EP568, EP569, EP570, EP571, EP572, EP573, EP574, EP575, EP576, EP577, EP578, EP579, EP580, EP581, EP582, EP583, EP584, EP585, EP586, EP587, EP588, EP589, EP590, EP591, EP592, EP593, EP594, EP595, EP596, EP597, EP598, EP599, EP600, EP601, EP602, EP603, EP604, EP605, EP606, EP607, EP608, EP609, EP610, EP611, EP612, EP613, EP614, EP615, EP616, EP617, EP618, EP619, EP620, EP621, EP622, EP623, EP624, EP625, EP626, EP627, EP628, EP629, EP630, EP631, EP632, EP633, EP634, EP635, EP636, EP637, EP638, EP639, EP640, EP641, EP642, EP643, EP644, EP645, EP646, EP647, EP648, EP649, EP650, EP651, EP652, EP653, EP654, EP655, EP656, EP657, EP658, EP659, EP660, EP661, EP662, EP663, EP664, EP665, EP666, EP667, EP668, EP669, EP670, EP671, EP672, EP673, EP674, EP675, EP676, EP677, EP678, EP679, EP680, EP681, EP682, EP683, EP684, EP685, EP686, EP687, EP688, EP689, EP690, EP691, EP692, EP693, EP694, EP695, EP696, EP697, EP698, EP699, EP700, EP701, EP702, EP703, EP704, EP705, EP706, EP707, EP708, EP709, EP710, EP711, EP712, EP713, EP714, EP715, EP716, EP717, EP718, EP719, EP720, EP721, EP722, EP723, EP724, EP725, EP726, EP727, EP728, EP729, EP730, EP731, EP732, EP733, EP734, EP735, EP736, EP737, EP738, EP739, EP740, EP741, EP742, EP743, EP744, EP745, EP746, EP747, EP748, EP749, EP750, EP751, EP752, EP753, EP754, EP755, EP756, EP757, EP758, EP759, EP760, EP761, EP762, EP763, EP764, EP765, EP766, EP767, EP768, EP769, EP770, EP771, EP772, EP773, EP774, EP775, EP776, EP777, EP778, EP779, EP780, EP781, EP782, EP783, EP784, EP785, EP786, EP787, EP788, EP789, EP790, EP791, EP792, EP793, EP794, EP795, EP796, EP797, EP798, EP799, EP800, EP801, EP802, EP803, EP804, EP805, EP806, EP807, EP808, EP809, EP810, EP811, EP812, EP813, EP814, EP815, EP816, EP817, EP818, EP819, EP820, EP821, EP822, EP823, EP824, EP825, EP826, EP827, EP828, EP829, EP830, EP831, EP832, EP833, EP834, EP835, EP836, EP837, EP838, EP839, EP840, EP841, EP842, EP843, EP844, EP845, EP846, EP847, EP848, EP849, EP850, EP851, EP852, EP853, EP854, EP855, EP856, EP857, EP858, EP859, EP860, EP861, EP862, EP863, EP864, EP865, EP866, EP867, EP868, EP869, EP870, EP871, EP872, EP873, EP874, EP875, EP876, EP877, EP878, EP879, EP880, EP881, EP882, EP883, EP884, EP885, EP886, EP887, EP888, EP889, EP890, EP891, EP892, EP893, EP894, EP895, EP896, EP897, EP898, EP899, EP900, EP901, EP902, EP903, EP904, EP905, EP906, EP907, EP908, EP909, EP910, EP911, EP912, EP913, EP914, EP915, EP916, EP917, EP918, EP919, EP920, EP921, EP922, EP923, EP924, EP925, EP926, EP927, EP928, EP929, EP930, EP931, EP932, EP933, EP934, EP935, EP936, EP937, EP938, EP939, EP940, EP941, EP942, EP943, EP944, EP945, EP946, EP947, EP948, EP949, EP950, EP951, EP952, EP953, EP954, EP955, EP956, EP957, EP958, EP959, EP960, EP961, EP962, EP963, EP964, EP965, EP966, EP967, EP968, EP969, EP970, EP971, EP972, EP973, EP974, EP975, EP976, EP977, EP978, EP979, EP980, EP981, EP982, EP983, EP984, EP985, EP986, EP987, EP988, EP989, EP990, EP991, EP992, EP993, EP994, EP995, EP996, EP997, EP998, EP999, EP1000.





|                                                                                                                                                                                                                                                                                                                                                                                                                                                                                                                                                                                                                                                                                                                                                                                                                                                                                                                                                                                                                                                                                                                                                                                                                                                                                                                                                                                                                                                                                                                                                                                                                                                                                                                                                                                                                                                                                                                                                                                                                  |                                                                                                                                                                                                                                                                                                                                                                                                                                                                                                                                                                                                                                                                                       |                                                                                                                                        |                                                                                                                                                                                           |                                                                                                                                                                                                                                                                                                                                                                                                                   |
|------------------------------------------------------------------------------------------------------------------------------------------------------------------------------------------------------------------------------------------------------------------------------------------------------------------------------------------------------------------------------------------------------------------------------------------------------------------------------------------------------------------------------------------------------------------------------------------------------------------------------------------------------------------------------------------------------------------------------------------------------------------------------------------------------------------------------------------------------------------------------------------------------------------------------------------------------------------------------------------------------------------------------------------------------------------------------------------------------------------------------------------------------------------------------------------------------------------------------------------------------------------------------------------------------------------------------------------------------------------------------------------------------------------------------------------------------------------------------------------------------------------------------------------------------------------------------------------------------------------------------------------------------------------------------------------------------------------------------------------------------------------------------------------------------------------------------------------------------------------------------------------------------------------------------------------------------------------------------------------------------------------|---------------------------------------------------------------------------------------------------------------------------------------------------------------------------------------------------------------------------------------------------------------------------------------------------------------------------------------------------------------------------------------------------------------------------------------------------------------------------------------------------------------------------------------------------------------------------------------------------------------------------------------------------------------------------------------|----------------------------------------------------------------------------------------------------------------------------------------|-------------------------------------------------------------------------------------------------------------------------------------------------------------------------------------------|-------------------------------------------------------------------------------------------------------------------------------------------------------------------------------------------------------------------------------------------------------------------------------------------------------------------------------------------------------------------------------------------------------------------|
| EPI_ISL_9651686, EPI_ISL_9651703, EPI_ISL_9652036, EPI_ISL_9652175, EPI_ISL_9652270, EPI_ISL_9652401, EPI_ISL_9652467, EPI_ISL_9652496, EPI_ISL_9652663, EPI_ISL_9652692, EPI_ISL_9652799, EPI_ISL_9652812, EPI_ISL_9652995, EPI_ISL_9653003, EPI_ISL_9653019, EPI_ISL_9653026, EPI_ISL_9653139, EPI_ISL_9653143, EPI_ISL_9653345, EPI_ISL_9653375, EPI_ISL_9653390, EPI_ISL_9653408, EPI_ISL_9653601, EPI_ISL_9653684, EPI_ISL_9653690, EPI_ISL_9653699, EPI_ISL_9653868, EPI_ISL_9653937, EPI_ISL_9654116, EPI_ISL_9654149, EPI_ISL_9654152, EPI_ISL_9654215, EPI_ISL_9654241, EPI_ISL_9654287, EPI_ISL_9654317, EPI_ISL_9654457, EPI_ISL_9654535, EPI_ISL_9654578, EPI_ISL_9654598, EPI_ISL_9655047, EPI_ISL_9655053, EPI_ISL_9655151, EPI_ISL_9655182, EPI_ISL_9655194, EPI_ISL_9655228, EPI_ISL_9655277, EPI_ISL_9655349, EPI_ISL_9655455, EPI_ISL_9655608, EPI_ISL_9655656, EPI_ISL_9655783, EPI_ISL_9655890, EPI_ISL_9655916, EPI_ISL_9662187, EPI_ISL_9662229, EPI_ISL_9662371, EPI_ISL_9690080, EPI_ISL_9690162, EPI_ISL_9690165, EPI_ISL_9690198, EPI_ISL_9690226, EPI_ISL_9690693, EPI_ISL_9690851, EPI_ISL_9691149, EPI_ISL_9691327, EPI_ISL_9691413, EPI_ISL_9691484, EPI_ISL_9691599, EPI_ISL_9691730, EPI_ISL_9691811, EPI_ISL_9691868, EPI_ISL_9691996, EPI_ISL_9692038, EPI_ISL_9692572, EPI_ISL_9692585, EPI_ISL_9692650, EPI_ISL_9694048, EPI_ISL_9694054, EPI_ISL_9694348                                                                                                                                                                                                                                                                                                                                                                                                                                                                                                                                                                                                                    | see above                                                                                                                                                                                                                                                                                                                                                                                                                                                                                                                                                                                                                                                                             | Department of Clinical Microbiology and Center for Genomic Medicine, Rigshospitalet, Copenhagen, Denmark                               | Statens Serum Institut Bioinformatics and Microbial Genomics                                                                                                                              | Danish Covid-19 Genome Consortium                                                                                                                                                                                                                                                                                                                                                                                 |
| EPI_ISL_8831746, EPI_ISL_8831772, EPI_ISL_8831817, EPI_ISL_8831921, EPI_ISL_8831958, EPI_ISL_8832002, EPI_ISL_8832018, EPI_ISL_8832068, EPI_ISL_8832097, EPI_ISL_8832112, EPI_ISL_8832139, EPI_ISL_8832242, EPI_ISL_8832280, EPI_ISL_8832333, EPI_ISL_8832367, EPI_ISL_8832383, EPI_ISL_8832449, EPI_ISL_8832495, EPI_ISL_8832496, EPI_ISL_8832501, EPI_ISL_8832508, EPI_ISL_8832515, EPI_ISL_8832620, EPI_ISL_8832623, EPI_ISL_8832663, EPI_ISL_8832764, EPI_ISL_8832863, EPI_ISL_8832896, EPI_ISL_8832942, EPI_ISL_8833117, EPI_ISL_8833138, EPI_ISL_8833162, EPI_ISL_8833293, EPI_ISL_8833399, EPI_ISL_8833453, EPI_ISL_8833510, EPI_ISL_8833544, EPI_ISL_8833594, EPI_ISL_8833567, EPI_ISL_8833656, EPI_ISL_8833659, EPI_ISL_8833684, EPI_ISL_8833861, EPI_ISL_8833866, EPI_ISL_8833946, EPI_ISL_8833985, EPI_ISL_8834086, EPI_ISL_8834177, EPI_ISL_8834258, EPI_ISL_8834346, EPI_ISL_8834565, EPI_ISL_8834592, EPI_ISL_8834760, EPI_ISL_8834813, EPI_ISL_8834820, EPI_ISL_8834904, EPI_ISL_8834907, EPI_ISL_8834950, EPI_ISL_8834981, EPI_ISL_8835002, EPI_ISL_8835114, EPI_ISL_8835169, EPI_ISL_8886044, EPI_ISL_8886716, EPI_ISL_8886747, EPI_ISL_8886803, EPI_ISL_8886828, EPI_ISL_8886942, EPI_ISL_8886946, EPI_ISL_8887110, EPI_ISL_8887130, EPI_ISL_8887253, EPI_ISL_8887444, EPI_ISL_8887447, EPI_ISL_8887463, EPI_ISL_8887502, EPI_ISL_8887513, EPI_ISL_8887526, EPI_ISL_8887890, EPI_ISL_8887891, EPI_ISL_9006308, EPI_ISL_9006520, EPI_ISL_9006566, EPI_ISL_9007646, EPI_ISL_9007718, EPI_ISL_9007753, EPI_ISL_9007959, EPI_ISL_9009151, EPI_ISL_9009154, EPI_ISL_9009282, EPI_ISL_9009295, EPI_ISL_9009586, EPI_ISL_9009697, EPI_ISL_9009738, EPI_ISL_9009755, EPI_ISL_9010102, EPI_ISL_9010110, EPI_ISL_9010131, EPI_ISL_9010268, EPI_ISL_9010303, EPI_ISL_9010321, EPI_ISL_9010329, EPI_ISL_9010554, EPI_ISL_9010558, EPI_ISL_9010784, EPI_ISL_9011360, EPI_ISL_9011413, EPI_ISL_9011457, EPI_ISL_9011464, EPI_ISL_9011565, EPI_ISL_9011589, EPI_ISL_9011856, EPI_ISL_9121694, EPI_ISL_9122929 | see above                                                                                                                                                                                                                                                                                                                                                                                                                                                                                                                                                                                                                                                                             | Department of Clinical Microbiology, Odense University Hospital, Odense, Denmark                                                       | Statens Serum Institut Bioinformatics and Microbial Genomics                                                                                                                              | Danish Covid-19 Genome Consortium                                                                                                                                                                                                                                                                                                                                                                                 |
| EPI_ISL_8825232, EPI_ISL_8825233, EPI_ISL_9101259, EPI_ISL_9101273                                                                                                                                                                                                                                                                                                                                                                                                                                                                                                                                                                                                                                                                                                                                                                                                                                                                                                                                                                                                                                                                                                                                                                                                                                                                                                                                                                                                                                                                                                                                                                                                                                                                                                                                                                                                                                                                                                                                               | EPI_ISL_9480721, EPI_ISL_9480722, EPI_ISL_9480770, EPI_ISL_9626529                                                                                                                                                                                                                                                                                                                                                                                                                                                                                                                                                                                                                    | Department of Medical Microbiology & Infection prevention, Amsterdam University Medical Centers location AMC                           | Department of Medical Microbiology & Infection prevention, Amsterdam University Medical Centers location AMC                                                                              | Akke Cornelissen; Fokja Zоргdrager; Janke Schinkel; Jelle Koopsen; Judith den Uij; Marcel Jonges; Matthijs Welkers; Menno de Jong; Robin van Houdt; Sebastien Matamoros; Sjoerd Rebers; Sylvia Bruisten; Tjalling Leenstra and Mariken van der Lubben on behalf of the Amsterdam Regional Genomic epidemiology and Outbreak Surveillance (ARGOS) consortium                                                       |
| EPI_ISL_9652304                                                                                                                                                                                                                                                                                                                                                                                                                                                                                                                                                                                                                                                                                                                                                                                                                                                                                                                                                                                                                                                                                                                                                                                                                                                                                                                                                                                                                                                                                                                                                                                                                                                                                                                                                                                                                                                                                                                                                                                                  | EPI_ISL_9464149                                                                                                                                                                                                                                                                                                                                                                                                                                                                                                                                                                                                                                                                       | Department of Medical Microbiology - section Molde, Molde Hospital                                                                     | Norwegian Institute of Public Health, Department of Virology                                                                                                                              | Atiya R Ali; Debech Nadia; Engebretsen Serina Beate; Garcia Llorente Ignacio; Hilde Elshaug; Hilde Nordby Falkenhaus; Hilde Vollan; Jon Bråte; Kamilla Heddeland Instefjord; Karoline Bragstad; Kathrine Stene-Johansen; Line Victoria Moen; Marie Paulsen Madsen; Olav Hungnes; Pedersen Benedikte Nevjen; Rasmus Riis Kopperud                                                                                  |
| EPI_ISL_8836822, EPI_ISL_8836831, EPI_ISL_8836844, EPI_ISL_8836853, EPI_ISL_8836854, EPI_ISL_9165358                                                                                                                                                                                                                                                                                                                                                                                                                                                                                                                                                                                                                                                                                                                                                                                                                                                                                                                                                                                                                                                                                                                                                                                                                                                                                                                                                                                                                                                                                                                                                                                                                                                                                                                                                                                                                                                                                                             | EPI_ISL_8799473, EPI_ISL_8799553, EPI_ISL_8799568, EPI_ISL_8799569, EPI_ISL_8799570                                                                                                                                                                                                                                                                                                                                                                                                                                                                                                                                                                                                   | Department of Public Health Microbiology Ljubljana, National Laboratory for Health, Environment and Food                               | Department for Public Health Microbiology Ljubljana, National Laboratory for Health, Environment and Food                                                                                 | Katarina Proscenc; Marija Trkov; Martin Bosilj; Natasa Berginc; Tom Koritnik; Verica Mloc                                                                                                                                                                                                                                                                                                                         |
| EPI_ISL_8836822, EPI_ISL_8836831, EPI_ISL_8836844, EPI_ISL_8836853, EPI_ISL_8836854, EPI_ISL_9165358                                                                                                                                                                                                                                                                                                                                                                                                                                                                                                                                                                                                                                                                                                                                                                                                                                                                                                                                                                                                                                                                                                                                                                                                                                                                                                                                                                                                                                                                                                                                                                                                                                                                                                                                                                                                                                                                                                             | EPI_ISL_8799473, EPI_ISL_8799553, EPI_ISL_8799568, EPI_ISL_8799569, EPI_ISL_8799570                                                                                                                                                                                                                                                                                                                                                                                                                                                                                                                                                                                                   | Dept. of Microbiology and Infection Control, Akershus University Hospital HF                                                           | Dept. of Microbiology and Infection Control, Akershus University Hospital HF                                                                                                              | Alexander Hesselberg Løvestad; Hanne Berggreen; Hege Vangstein Aamot                                                                                                                                                                                                                                                                                                                                              |
| EPI_ISL_9202622                                                                                                                                                                                                                                                                                                                                                                                                                                                                                                                                                                                                                                                                                                                                                                                                                                                                                                                                                                                                                                                                                                                                                                                                                                                                                                                                                                                                                                                                                                                                                                                                                                                                                                                                                                                                                                                                                                                                                                                                  | EPI_ISL_9376204                                                                                                                                                                                                                                                                                                                                                                                                                                                                                                                                                                                                                                                                       | Diagnostyka Sp. z o. o. Szczecin                                                                                                       | 1. Academic Center for Pathomorphological and Genetic-Molecular Diagnostics Ltd, Białystok, Poland 2. National Institute of Public Health - National Institute of Hygiene, Warsaw, Poland | Anetta Sulewska; Jacek Nikiłski; Janusz Dzięcioł; Joanna Kiśluk; Katarzyna Zacharczuk; Konrad Raczkowski; Magdalena Nowakowska; Małgorzata Sadkowska-Todys; Piotr Karabowicz; Piotr Majewski; Przemysław Bieчек. Joanna Reszeć; Radosław Charkiewicz; Tomasz Wołkowicz                                                                                                                                            |
| EPI_ISL_8985651, EPI_ISL_8985732, EPI_ISL_8985759                                                                                                                                                                                                                                                                                                                                                                                                                                                                                                                                                                                                                                                                                                                                                                                                                                                                                                                                                                                                                                                                                                                                                                                                                                                                                                                                                                                                                                                                                                                                                                                                                                                                                                                                                                                                                                                                                                                                                                | EPI_ISL_9779417, EPI_ISL_9779478, EPI_ISL_9779479, EPI_ISL_9779480, EPI_ISL_9779489, EPI_ISL_9779490, EPI_ISL_9779422, EPI_ISL_9779423, EPI_ISL_9779424, EPI_ISL_9779426, EPI_ISL_9779427, EPI_ISL_9779428, EPI_ISL_9779429, EPI_ISL_9779434, EPI_ISL_9779435, EPI_ISL_9779436, EPI_ISL_9779437, EPI_ISL_9779438, EPI_ISL_9779440, EPI_ISL_9779441, EPI_ISL_9779442, EPI_ISL_9779443, EPI_ISL_9779444, EPI_ISL_9779445, EPI_ISL_9779446, EPI_ISL_9779447, EPI_ISL_9779477, EPI_ISL_9779478, EPI_ISL_9779479, EPI_ISL_9779480, EPI_ISL_9779489, EPI_ISL_9779490, EPI_ISL_9779491, EPI_ISL_9779492, EPI_ISL_9779493, EPI_ISL_9779494, EPI_ISL_9779495, EPI_ISL_9779496, EPI_ISL_9779497 | Diagnostyka. Laboratoria Medyczne.                                                                                                     | 1. ViroGenetics - BSL3 Laboratory of Virology, Malopolska Centre of Biotechnology, Jagiellonian University; 2. Diagnoston Laboratoria Lukasz Rabalski                                     | Gromowski, T.; Kowalski, M.; Labaj; Maciej Kosinski; Mazur-Panasiuk, N.; P.P.; Pyrc, K.; Rabalski L.; Rogalska-Kupiec M.; Swadzba J.; Sylwia Januszczak; Szulc, P.; Wydmanski, W.                                                                                                                                                                                                                                 |
| EPI_ISL_9185286, EPI_ISL_9185292, EPI_ISL_9185563, EPI_ISL_9185701, EPI_ISL_9185917, EPI_ISL_9185952, EPI_ISL_9530724, EPI_ISL_9530728, EPI_ISL_9530782, EPI_ISL_9530798, EPI_ISL_9531099, EPI_ISL_9531201, EPI_ISL_9531203, EPI_ISL_9531213, EPI_ISL_9531250, EPI_ISL_9531251, EPI_ISL_9531259, EPI_ISL_9531360, EPI_ISL_9531382, EPI_ISL_9531454, EPI_ISL_9531503, EPI_ISL_9531506, EPI_ISL_9531562                                                                                                                                                                                                                                                                                                                                                                                                                                                                                                                                                                                                                                                                                                                                                                                                                                                                                                                                                                                                                                                                                                                                                                                                                                                                                                                                                                                                                                                                                                                                                                                                            | EPI_ISL_8885516                                                                                                                                                                                                                                                                                                                                                                                                                                                                                                                                                                                                                                                                       | District Hospital                                                                                                                      | Centre for DNA Fingerprinting and Diagnostics                                                                                                                                             | Arunkumar Karunanidhi; Ashwin Dalal; Asmita Gupta; Divya Vashista; Murali Bashyam; Nagamani Kammlili; Rupin Shelake; Vinay Donipadi                                                                                                                                                                                                                                                                               |
| EPI_ISL_9792278, EPI_ISL_9792312, EPI_ISL_9792391, EPI_ISL_9792407, EPI_ISL_9792713, EPI_ISL_9792763, EPI_ISL_9792768, EPI_ISL_9792770                                                                                                                                                                                                                                                                                                                                                                                                                                                                                                                                                                                                                                                                                                                                                                                                                                                                                                                                                                                                                                                                                                                                                                                                                                                                                                                                                                                                                                                                                                                                                                                                                                                                                                                                                                                                                                                                           | EPI_ISL_8890468, EPI_ISL_8890478, EPI_ISL_9139258, EPI_ISL_9139298, EPI_ISL_9139299, EPI_ISL_9139301, EPI_ISL_9139304                                                                                                                                                                                                                                                                                                                                                                                                                                                                                                                                                                 | District Hospital, Navsari                                                                                                             | Gujarat Biotechnology Research Centre                                                                                                                                                     | Akhilesh Modi; Apurvashin Puvar; Bhadresinh Gohil; Chaitanya Joshi; Disha Vora; Janvi Raval; Jaykumar Rangani; Jaysukh Mangukiya; Madhvi Joshi; Nimesh Patel; Nitin Savaliya; NitinShukla; Priyank Chavda; Ramesh Pandit; Rashmi Mishra; Sonal Sharma; Tasnim Trivedi; Zarna Patel                                                                                                                                |
| see above                                                                                                                                                                                                                                                                                                                                                                                                                                                                                                                                                                                                                                                                                                                                                                                                                                                                                                                                                                                                                                                                                                                                                                                                                                                                                                                                                                                                                                                                                                                                                                                                                                                                                                                                                                                                                                                                                                                                                                                                        | see above                                                                                                                                                                                                                                                                                                                                                                                                                                                                                                                                                                                                                                                                             | Division of Emerging Infectious Diseases, Bureau of Infectious Diseases Diagnosis Control, Korea Disease Control and Prevention Agency | Division of Emerging Infectious Diseases, Bureau of Infectious Diseases Diagnosis Control, Korea Disease Control and Prevention Agency                                                    | Ae Kyung Park; Chae Young Lee; Eun-jin Kim; Hyuck Jin Lee; Il-Hwan Kim; Jeong-Ah Kim                                                                                                                                                                                                                                                                                                                              |
| see above                                                                                                                                                                                                                                                                                                                                                                                                                                                                                                                                                                                                                                                                                                                                                                                                                                                                                                                                                                                                                                                                                                                                                                                                                                                                                                                                                                                                                                                                                                                                                                                                                                                                                                                                                                                                                                                                                                                                                                                                        | see above                                                                                                                                                                                                                                                                                                                                                                                                                                                                                                                                                                                                                                                                             | Division of Medical Virology, National Health Laboratory Service (NHLS), Tygerberg Hospital / Stellenbosch University                  | Division of Medical Virology, National Health Laboratory Service (NHLS), Tygerberg Hospital / Stellenbosch University                                                                     | Gert van Zyl; Mathilda Claassen; Shannon Wilson; Susan Engelbrecht; Tania Stander; Tongai Maponga; Wolfgang Preiser                                                                                                                                                                                                                                                                                               |
| EPI_ISL_8927711, EPI_ISL_8927734, EPI_ISL_9528280                                                                                                                                                                                                                                                                                                                                                                                                                                                                                                                                                                                                                                                                                                                                                                                                                                                                                                                                                                                                                                                                                                                                                                                                                                                                                                                                                                                                                                                                                                                                                                                                                                                                                                                                                                                                                                                                                                                                                                | EPI_ISL_8929067                                                                                                                                                                                                                                                                                                                                                                                                                                                                                                                                                                                                                                                                       | Dutch COVID-19 response team                                                                                                           | Erasmus Medical Center                                                                                                                                                                    | Anne van der Linden; Annetiek van der Eijk; Bas Oude Munnink; Corine GeurtsvanKessel; David Nieuwenhuijse; Emmanuelle Munger; Irina Chestakova; Marion Koopmans; Marjan Boter; Reina Sikkema; Richard Molenkamp; on behalf of the Dutch national COVID-19 response team.                                                                                                                                          |
| EPI_ISL_9185286, EPI_ISL_9185292, EPI_ISL_9185563, EPI_ISL_9185701, EPI_ISL_9185917, EPI_ISL_9185952, EPI_ISL_9530724, EPI_ISL_9530728, EPI_ISL_9530782, EPI_ISL_9530798, EPI_ISL_9531099, EPI_ISL_9531201, EPI_ISL_9531203, EPI_ISL_9531213, EPI_ISL_9531250, EPI_ISL_9531251, EPI_ISL_9531259, EPI_ISL_9531360, EPI_ISL_9531382, EPI_ISL_9531454, EPI_ISL_9531503, EPI_ISL_9531506, EPI_ISL_9531562                                                                                                                                                                                                                                                                                                                                                                                                                                                                                                                                                                                                                                                                                                                                                                                                                                                                                                                                                                                                                                                                                                                                                                                                                                                                                                                                                                                                                                                                                                                                                                                                            | EPI_ISL_9808315, EPI_ISL_9401924                                                                                                                                                                                                                                                                                                                                                                                                                                                                                                                                                                                                                                                      | Dutch COVID-19 response team                                                                                                           | National Institute for Public Health and the Environment (RIVM)                                                                                                                           | Adam Meijer; Afke Vogelzang; AnneMarie van den Brandt; Annelies Kroneman; Bas van der Veer; Chantal Reusken; Dennis Schmitz; Dirk Eggink; Florian Zwagemaker; Harry Vennema; Ivo van Wallie; Jeroen Cremer; Jil Kocken; Jordy de Bakker; Karim Hajji; Kim Freriks; Linda van Someren; Lisa Wilsman; Lynn Aarts; Ryanne Jaarsma; Sanne Bos; Sharon van den Brink; on behalf of the national COVID-19 response team |
| EPI_ISL_9501509, EPI_ISL_9501510, EPI_ISL_9501511, EPI_ISL_9501512, EPI_ISL_9501564, EPI_ISL_9501565, EPI_ISL_9501885, EPI_ISL_9501886, EPI_ISL_9501887, EPI_ISL_9501888, EPI_ISL_9501889, EPI_ISL_9501892, EPI_ISL_9501893, EPI_ISL_9501894, EPI_ISL_9501895, EPI_ISL_9501924, EPI_ISL_9502022, EPI_ISL_9800768, EPI_ISL_9800779, EPI_ISL_9800874, EPI_ISL_9800877, EPI_ISL_9800878, EPI_ISL_9800879, EPI_ISL_9800894, EPI_ISL_9800904, EPI_ISL_9801177                                                                                                                                                                                                                                                                                                                                                                                                                                                                                                                                                                                                                                                                                                                                                                                                                                                                                                                                                                                                                                                                                                                                                                                                                                                                                                                                                                                                                                                                                                                                                         | see above                                                                                                                                                                                                                                                                                                                                                                                                                                                                                                                                                                                                                                                                             | Excite Lab                                                                                                                             | Andersen lab at Scripps Research                                                                                                                                                          | Abigail Schnapper; Angela Scioscia; Cheryl Anderson; Chip Schooley; Greg Humphrey; Helena Tubb; Natasha Martin; Sawyer Farmer; Smruthi Karthikeyan; Tommy Valles + SEARCH                                                                                                                                                                                                                                         |
| see above                                                                                                                                                                                                                                                                                                                                                                                                                                                                                                                                                                                                                                                                                                                                                                                                                                                                                                                                                                                                                                                                                                                                                                                                                                                                                                                                                                                                                                                                                                                                                                                                                                                                                                                                                                                                                                                                                                                                                                                                        | see above                                                                                                                                                                                                                                                                                                                                                                                                                                                                                                                                                                                                                                                                             | Edendale hospital                                                                                                                      | National Institute for Communicable Diseases of the National Health Laboratory Service                                                                                                    | Amoako DG; Bhiman JN; Ereratt J; Ismail A; Kekana D; Mahlangu B; Mnguni A; Mohale T; Ntuli N; Scheepers C; Wolter N                                                                                                                                                                                                                                                                                               |
| EPI_ISL_9554095, EPI_ISL_9554100, EPI_ISL_9554238                                                                                                                                                                                                                                                                                                                                                                                                                                                                                                                                                                                                                                                                                                                                                                                                                                                                                                                                                                                                                                                                                                                                                                                                                                                                                                                                                                                                                                                                                                                                                                                                                                                                                                                                                                                                                                                                                                                                                                | EPI_ISL_9468294                                                                                                                                                                                                                                                                                                                                                                                                                                                                                                                                                                                                                                                                       | Edmonton Provincial Lab                                                                                                                | Alberta Precision Labs (APL)                                                                                                                                                              | Buss; Croxen M; Deo A; Dieu P; E; Ferrato C; Gill K; Koleva P; Li V; Lloyd C; Lynch T; Ma R; Murphy S; Pabbaraju K; Shideler S.; Shokoples S; Skitsko T; Thayer J; Tipples G; Wong A; Yu C; Zelyas N                                                                                                                                                                                                              |
| EPI_ISL_9468294                                                                                                                                                                                                                                                                                                                                                                                                                                                                                                                                                                                                                                                                                                                                                                                                                                                                                                                                                                                                                                                                                                                                                                                                                                                                                                                                                                                                                                                                                                                                                                                                                                                                                                                                                                                                                                                                                                                                                                                                  | EPI_ISL_9573288, EPI_ISL_9480724, EPI_ISL_9480725                                                                                                                                                                                                                                                                                                                                                                                                                                                                                                                                                                                                                                     | Enfer                                                                                                                                  | Enfer                                                                                                                                                                                     | Elaine M. Kenny; Suzie Coughlan                                                                                                                                                                                                                                                                                                                                                                                   |
| EPI_ISL_9468294                                                                                                                                                                                                                                                                                                                                                                                                                                                                                                                                                                                                                                                                                                                                                                                                                                                                                                                                                                                                                                                                                                                                                                                                                                                                                                                                                                                                                                                                                                                                                                                                                                                                                                                                                                                                                                                                                                                                                                                                  | EPI_ISL_9140955, EPI_ISL_9140987, EPI_ISL_9326446, EPI_ISL_9327003, EPI_ISL_9332430                                                                                                                                                                                                                                                                                                                                                                                                                                                                                                                                                                                                   | Faculty Hospital Bulovka, Department of Clinical Microbiology                                                                          | Charles University, Faculty of Science, BIOCEV, OMICS Genomics                                                                                                                            | Aižbeta Bučková; Blanka Hamplová; Ingrid Poláková; Jiří Novák; Nela Václavíková; Ruth Tachezy; Sebastian Cristian Treitli; Vladimír Hampl; Zoltán Fűssy; Štěpánka Hrdá                                                                                                                                                                                                                                            |
| EPI_ISL_9573288, EPI_ISL_9480724, EPI_ISL_9480725                                                                                                                                                                                                                                                                                                                                                                                                                                                                                                                                                                                                                                                                                                                                                                                                                                                                                                                                                                                                                                                                                                                                                                                                                                                                                                                                                                                                                                                                                                                                                                                                                                                                                                                                                                                                                                                                                                                                                                | EPI_ISL_9140955, EPI_ISL_9140987, EPI_ISL_9326446, EPI_ISL_9327003, EPI_ISL_9332430                                                                                                                                                                                                                                                                                                                                                                                                                                                                                                                                                                                                   | False Bay Hospital wc FBH                                                                                                              | NHLS/UCT                                                                                                                                                                                  | Arash Iranzadeh; Bruna Galvao; Carolyn Williamson; Deelan Doolabh; Diana Hardie; Gert Marais; Innocent Mudau; Luicer Olubayo; Lynn Tyers; Marvin Hsiao; Nokuzola Mbehe; Rageema Joseph; Stephen Korsman                                                                                                                                                                                                           |
| EPI_ISL_9140955, EPI_ISL_9140987, EPI_ISL_9326446, EPI_ISL_9327003, EPI_ISL_9332430                                                                                                                                                                                                                                                                                                                                                                                                                                                                                                                                                                                                                                                                                                                                                                                                                                                                                                                                                                                                                                                                                                                                                                                                                                                                                                                                                                                                                                                                                                                                                                                                                                                                                                                                                                                                                                                                                                                              | EPI_ISL_9480775, EPI_ISL_9480776, EPI_ISL_9626270, EPI_ISL_9626343, EPI_ISL_9626344, EPI_ISL_9626346, EPI_ISL_9626347, EPI_ISL_9626350, EPI_ISL_9626351, EPI_ISL_9626354, EPI_ISL_9626354, EPI_ISL_9626356, EPI_ISL_9626358, EPI_ISL_9626359, EPI_ISL_9626435, EPI_ISL_9626436, EPI_ISL_9626441, EPI_ISL_9626446, EPI_ISL_9626448, EPI_ISL_9626527, EPI_ISL_9649948, EPI_ISL_9649949                                                                                                                                                                                                                                                                                                  | Foerde Hospital, Department of Microbiology                                                                                            | Norwegian Institute of Public Health, Department of Virology                                                                                                                              | Atiya R Ali; Debech Nadia; Engebretsen Serina Beate; Garcia Llorente Ignacio; Hilde Elshaug; Hilde Nordby Falkenhaus; Hilde Vollan; Jon Bråte; Kamilla Heddeland Instefjord; Karoline Bragstad; Kathrine Stene-Johansen; Line Victoria Moen; Marie Paulsen Madsen; Olav Hungnes; Pedersen Benedikte Nevjen; Rasmus Riis Kopperud                                                                                  |
| EPI_ISL_9140955, EPI_ISL_9140987, EPI_ISL_9326446, EPI_ISL_9327003, EPI_ISL_9332430                                                                                                                                                                                                                                                                                                                                                                                                                                                                                                                                                                                                                                                                                                                                                                                                                                                                                                                                                                                                                                                                                                                                                                                                                                                                                                                                                                                                                                                                                                                                                                                                                                                                                                                                                                                                                                                                                                                              | EPI_ISL_9480775, EPI_ISL_9480776, EPI_ISL_9626270, EPI_ISL_9626343, EPI_ISL_9626344, EPI_ISL_9626346, EPI_ISL_9626347, EPI_ISL_9626350, EPI_ISL_9626351, EPI_ISL_9626354, EPI_ISL_9626354, EPI_ISL_9626356, EPI_ISL_9626358, EPI_ISL_9626359, EPI_ISL_9626435, EPI_ISL_9626436, EPI_ISL_9626441, EPI_ISL_9626446, EPI_ISL_9626448, EPI_ISL_9626527, EPI_ISL_9649948, EPI_ISL_9649949                                                                                                                                                                                                                                                                                                  | Fulgent Genetics                                                                                                                       | Centers for Disease Control and Prevention Division of Viral Diseases, Pathogen Discovery                                                                                                 | Becky Tsai; Benafsh Sapra; Benjamin Rambo-Martin; Christopher Gulvick; Clinton Paden; Dakota Howard; Dhwanj Batra; Doreen Ng; Duncan MacCannell; Erisa Sula; Harry Gao; James Xie; Jason Caravas; John Gao; Joseph Fierro; Kristine Lacey; Matthew Schmerer; Mickey Li; Peter Cook; Scott Sammons; Shatavia Morrison; Tymeckia Kendall; Victoria Caban Figueroa; Yan Meng; Yvette Unoarumhi                       |
| EPI_ISL_9480775, EPI_ISL_9480776, EPI_ISL_9626270, EPI_ISL_9626343, EPI_ISL_9626344, EPI_ISL_9626346, EPI_ISL_9626347, EPI_ISL_9626350, EPI_ISL_9626351, EPI_ISL_9626354, EPI_ISL_9626354, EPI_ISL_9626356, EPI_ISL_9626358, EPI_ISL_9626359, EPI_ISL_9626435, EPI_ISL_9626436, EPI_ISL_9626441, EPI_ISL_9626446, EPI_ISL_9626448, EPI_ISL_9626527, EPI_ISL_9649948, EPI_ISL_9649949                                                                                                                                                                                                                                                                                                                                                                                                                                                                                                                                                                                                                                                                                                                                                                                                                                                                                                                                                                                                                                                                                                                                                                                                                                                                                                                                                                                                                                                                                                                                                                                                                             | see above                                                                                                                                                                                                                                                                                                                                                                                                                                                                                                                                                                                                                                                                             | Furst Medical Laboratory                                                                                                               | Norwegian Institute of Public Health, Department                                                                                                                                          | Atiya R Ali; Debech Nadia; Engebretsen Serina Beate; Garcia Llorente Ignacio; Hilde Elshaug; Hilde Nordby Falkenhaus; Hilde Vollan; Jon Bråte; Kamilla Heddeland Instefjord; Karoline Bragstad; Kathrine Stene-Johansen; Line Victoria Moen; Marie Paulsen Madsen; Olav                                                                                                                                           |

| of Virology                                                                                                                                                                                                                                                                                                                                                                                                                                                                                                                                                                                                                                                                                                                                                                                                                                                                                                                                                                                                                                                                                                                                                                                                                                                                                                                                                                                                                                                                                                                                                                                                                                                                                                                                                                                                                                                                                                                                                                                                                                                                                                                                                                                                                                                                                                                                                                                                                                                                                                                                                                                                                                                                                                                                                                                                                                                                                                                                                                             |                                                                                |                                                                                                                                                                                                                    | Hungnes; Pedersen Benedikte Nevjen; Rasmus Riis Kopperud                                                                                                                                                                                                                                                                       |
|-----------------------------------------------------------------------------------------------------------------------------------------------------------------------------------------------------------------------------------------------------------------------------------------------------------------------------------------------------------------------------------------------------------------------------------------------------------------------------------------------------------------------------------------------------------------------------------------------------------------------------------------------------------------------------------------------------------------------------------------------------------------------------------------------------------------------------------------------------------------------------------------------------------------------------------------------------------------------------------------------------------------------------------------------------------------------------------------------------------------------------------------------------------------------------------------------------------------------------------------------------------------------------------------------------------------------------------------------------------------------------------------------------------------------------------------------------------------------------------------------------------------------------------------------------------------------------------------------------------------------------------------------------------------------------------------------------------------------------------------------------------------------------------------------------------------------------------------------------------------------------------------------------------------------------------------------------------------------------------------------------------------------------------------------------------------------------------------------------------------------------------------------------------------------------------------------------------------------------------------------------------------------------------------------------------------------------------------------------------------------------------------------------------------------------------------------------------------------------------------------------------------------------------------------------------------------------------------------------------------------------------------------------------------------------------------------------------------------------------------------------------------------------------------------------------------------------------------------------------------------------------------------------------------------------------------------------------------------------------------|--------------------------------------------------------------------------------|--------------------------------------------------------------------------------------------------------------------------------------------------------------------------------------------------------------------|--------------------------------------------------------------------------------------------------------------------------------------------------------------------------------------------------------------------------------------------------------------------------------------------------------------------------------|
| EPI_ISL_9775178                                                                                                                                                                                                                                                                                                                                                                                                                                                                                                                                                                                                                                                                                                                                                                                                                                                                                                                                                                                                                                                                                                                                                                                                                                                                                                                                                                                                                                                                                                                                                                                                                                                                                                                                                                                                                                                                                                                                                                                                                                                                                                                                                                                                                                                                                                                                                                                                                                                                                                                                                                                                                                                                                                                                                                                                                                                                                                                                                                         | GCS Medical College, Ahmedabad                                                 | Gujarat Biotechnology Research Centre                                                                                                                                                                              | Akhilesh Modi; Apurvasinh Puvar; Bhadreshsinh Gohil; Chaitanya Joshi; Disha Vora; Janvi Raval; Jaykumar Rangani; Madhvi Joshi; Nimesh Patel; Nitin Savaliya; NitinShukla; Priyank Chavda; Ramesh Pandit; Roshani Mishra; Sonal Sharma; Tasnim Trivedi; Urvesh Shah; Zarna Patel                                                |
| EPI_ISL_9080074, EPI_ISL_9357246, EPI_ISL_9357339, EPI_ISL_9428407                                                                                                                                                                                                                                                                                                                                                                                                                                                                                                                                                                                                                                                                                                                                                                                                                                                                                                                                                                                                                                                                                                                                                                                                                                                                                                                                                                                                                                                                                                                                                                                                                                                                                                                                                                                                                                                                                                                                                                                                                                                                                                                                                                                                                                                                                                                                                                                                                                                                                                                                                                                                                                                                                                                                                                                                                                                                                                                      | GH A.CHENEVIER-H.MONDOR                                                        | Department of Virology, Henri Mondor University Hospital, Assistance Publique Hôpitaux de Paris, Université Paris-Est Créteil, INSERM U955                                                                         | Alexandre Soulier; Christophe Rodriguez; Elisabeth Trawinski; Guillaume Gricourt; Jean-Michel Pawlowsky; Melissa N'Debi; Slim Fourati; Vanessa Demontant                                                                                                                                                                       |
| EPI_ISL_9402984, EPI_ISL_9402985                                                                                                                                                                                                                                                                                                                                                                                                                                                                                                                                                                                                                                                                                                                                                                                                                                                                                                                                                                                                                                                                                                                                                                                                                                                                                                                                                                                                                                                                                                                                                                                                                                                                                                                                                                                                                                                                                                                                                                                                                                                                                                                                                                                                                                                                                                                                                                                                                                                                                                                                                                                                                                                                                                                                                                                                                                                                                                                                                        | GMERS Medical College and Hospital, Sola, Ahmedabad                            | Gujarat Biotechnology Research Centre                                                                                                                                                                              | Akhilesh Modi; Apurvasinh Puvar; Bhadreshsinh Gohil; Chaitanya Joshi; Disha Vora; Janvi Raval; Jaykumar Rangani; Madhvi Joshi; Nimesh Patel; Nitin Savaliya; Nitin Shukla; Parul Patel; Priyank Chavda; Ramesh Pandit; Roshani Mishra; Sonal Sharma; Tasnim Trivedi; Zarna Patel                                               |
| EPI_ISL_9403000, EPI_ISL_9403001, EPI_ISL_9403002, EPI_ISL_9403003                                                                                                                                                                                                                                                                                                                                                                                                                                                                                                                                                                                                                                                                                                                                                                                                                                                                                                                                                                                                                                                                                                                                                                                                                                                                                                                                                                                                                                                                                                                                                                                                                                                                                                                                                                                                                                                                                                                                                                                                                                                                                                                                                                                                                                                                                                                                                                                                                                                                                                                                                                                                                                                                                                                                                                                                                                                                                                                      | GMERS Medical College, Gandhinagar                                             | Gujarat Biotechnology Research Centre                                                                                                                                                                              | Akhilesh Modi; Apurvasinh Puvar; Bhadreshsinh Gohil; Chaitanya Joshi; Disha Vora; Gaurishankar Shrimali; Janvi Raval; Jaykumar Rangani; Madhvi Joshi; Nimesh Patel; Nitin Savaliya; Nitin Shukla; Priyank Chavda; Ramesh Pandit; Roshani Mishra; Sonal Sharma; Tasnim Trivedi; Zarna Patel                                     |
| EPI_ISL_9402993                                                                                                                                                                                                                                                                                                                                                                                                                                                                                                                                                                                                                                                                                                                                                                                                                                                                                                                                                                                                                                                                                                                                                                                                                                                                                                                                                                                                                                                                                                                                                                                                                                                                                                                                                                                                                                                                                                                                                                                                                                                                                                                                                                                                                                                                                                                                                                                                                                                                                                                                                                                                                                                                                                                                                                                                                                                                                                                                                                         | GMERS Medical College, Valsad                                                  | Gujarat Biotechnology Research Centre                                                                                                                                                                              | Akhilesh Modi; Apurvasinh Puvar; Bhadreshsinh Gohil; Chaitanya Joshi; Disha Vora; Janvi Raval; Jaykumar Rangani; Madhvi Joshi; Nimesh Patel; Nitin Savaliya; Nitin Shukla; Priyank Chavda; Ramesh Pandit; Roshani Mishra; Sonal Sharma; Tasnim Trivedi; Vicky Gandhi; Zarna Patel                                              |
| EPI_ISL_9533421                                                                                                                                                                                                                                                                                                                                                                                                                                                                                                                                                                                                                                                                                                                                                                                                                                                                                                                                                                                                                                                                                                                                                                                                                                                                                                                                                                                                                                                                                                                                                                                                                                                                                                                                                                                                                                                                                                                                                                                                                                                                                                                                                                                                                                                                                                                                                                                                                                                                                                                                                                                                                                                                                                                                                                                                                                                                                                                                                                         | Gandhi Medical College and Hospital (GMCH), Secunderabad                       | NIV Influenza                                                                                                                                                                                                      | D.R.Manisha Rani; Dr.G.Sushma Rajya Lakshmi; Dr.K.Nagamani; Dr.Sunita Pakalapaty                                                                                                                                                                                                                                               |
| EPI_ISL_9111501, EPI_ISL_9111512, EPI_ISL_9111514                                                                                                                                                                                                                                                                                                                                                                                                                                                                                                                                                                                                                                                                                                                                                                                                                                                                                                                                                                                                                                                                                                                                                                                                                                                                                                                                                                                                                                                                                                                                                                                                                                                                                                                                                                                                                                                                                                                                                                                                                                                                                                                                                                                                                                                                                                                                                                                                                                                                                                                                                                                                                                                                                                                                                                                                                                                                                                                                       | GeneMe Labs, ul. Potokowa 10A, 80-283 Gdańsk                                   | 1. Tricity SARS-CoV-2 sequencing consortium: University of Gdansk, Medical University of Gdansk, Vaxican Ltd., Invicta Ltd. 2. National Institute of Public Health - National Institute of Hygiene, Warsaw, Poland | Celina Cybulska; Karolina Gackowska; Katarzyna Groth; Katarzyna Zacharczuk; Krystyna Bienkowska Szewczyk; Lukasz Rabalski; Maciej Grzybek; Maciej Kosinski; Magdalena Nowakowska; Marcin Lubocki; Małgorzata Sadkowska-Todys; Tomasz Wolkowicz                                                                                 |
| EPI_ISL_9618122                                                                                                                                                                                                                                                                                                                                                                                                                                                                                                                                                                                                                                                                                                                                                                                                                                                                                                                                                                                                                                                                                                                                                                                                                                                                                                                                                                                                                                                                                                                                                                                                                                                                                                                                                                                                                                                                                                                                                                                                                                                                                                                                                                                                                                                                                                                                                                                                                                                                                                                                                                                                                                                                                                                                                                                                                                                                                                                                                                         | General Hospital, Ahwa                                                         | Gujarat Biotechnology Research Centre                                                                                                                                                                              | Akhilesh Modi; Apurvasinh Puvar; Bhadreshsinh Gohil; Chaitanya Joshi; Disha Vora; Hetal Ahir; Janvi Raval; Jaykumar Rangani; Madhvi Joshi; Nimesh Patel; Nitin Savaliya; NitinShukla; Priyank Chavda; Ramesh Pandit; Roshani Mishra; Sonal Sharma; Tasnim Trivedi; Zarna Patel                                                 |
| EPI_ISL_9604305                                                                                                                                                                                                                                                                                                                                                                                                                                                                                                                                                                                                                                                                                                                                                                                                                                                                                                                                                                                                                                                                                                                                                                                                                                                                                                                                                                                                                                                                                                                                                                                                                                                                                                                                                                                                                                                                                                                                                                                                                                                                                                                                                                                                                                                                                                                                                                                                                                                                                                                                                                                                                                                                                                                                                                                                                                                                                                                                                                         | General Hospital, Mehsana                                                      | Gujarat Biotechnology Research Centre                                                                                                                                                                              | Akhilesh Modi; Apurvasinh Puvar; Bhadreshsinh Gohil; Chaitanya Joshi; Dinesh Vyas; Disha Vora; Janvi Raval; Jaykumar Rangani; Madhvi Joshi; Nimesh Patel; Nitin Savaliya; NitinShukla; Priyank Chavda; Ramesh Pandit; Roshani Mishra; Sonal Sharma; Tasnim Trivedi; Zarna Patel                                                |
| EPI_ISL_9023225, EPI_ISL_9610170, EPI_ISL_9610236                                                                                                                                                                                                                                                                                                                                                                                                                                                                                                                                                                                                                                                                                                                                                                                                                                                                                                                                                                                                                                                                                                                                                                                                                                                                                                                                                                                                                                                                                                                                                                                                                                                                                                                                                                                                                                                                                                                                                                                                                                                                                                                                                                                                                                                                                                                                                                                                                                                                                                                                                                                                                                                                                                                                                                                                                                                                                                                                       | Genexprole Diagnostic center, Ahmedabad                                        | Gujarat Biotechnology Research Centre                                                                                                                                                                              | Akhilesh Modi; Apurvasinh Puvar; Ashish Patel; Bhadreshsinh Gohil; Chaitanya Joshi; Disha Vora; Janvi Raval; Jaykumar Rangani; Madhvi Joshi; Nimesh Patel; Nitin Savaliya; NitinShukla; Priyank Chavda; Ramesh Pandit; Roshani Mishra; Sonal Sharma; Tasnim Trivedi; Zarna Patel                                               |
| EPI_ISL_9779386, EPI_ISL_9779387                                                                                                                                                                                                                                                                                                                                                                                                                                                                                                                                                                                                                                                                                                                                                                                                                                                                                                                                                                                                                                                                                                                                                                                                                                                                                                                                                                                                                                                                                                                                                                                                                                                                                                                                                                                                                                                                                                                                                                                                                                                                                                                                                                                                                                                                                                                                                                                                                                                                                                                                                                                                                                                                                                                                                                                                                                                                                                                                                        | Government Fever Hospital                                                      | Centre for DNA Fingerprinting and Diagnostics                                                                                                                                                                      | Arunkumar Karunanidhi; Ashwin Dalal; Asmita Gupta; Divya Vashishta; Murali Bashyam; Nagamani Kammili; Rupin Shelake; Vinay Donipadi                                                                                                                                                                                            |
| EPI_ISL_9610231                                                                                                                                                                                                                                                                                                                                                                                                                                                                                                                                                                                                                                                                                                                                                                                                                                                                                                                                                                                                                                                                                                                                                                                                                                                                                                                                                                                                                                                                                                                                                                                                                                                                                                                                                                                                                                                                                                                                                                                                                                                                                                                                                                                                                                                                                                                                                                                                                                                                                                                                                                                                                                                                                                                                                                                                                                                                                                                                                                         | Government Medical College, Bhavnagar                                          | Gujarat Biotechnology Research Centre                                                                                                                                                                              | Akhilesh Modi; Apurvasinh Puvar; Bhadreshsinh Gohil; Chaitanya Joshi; Disha Vora; Janvi Raval; Jaykumar Rangani; Kairavi Desai; Madhvi Joshi; Nimesh Patel; Nitin Savaliya; NitinShukla; Priyank Chavda; Ramesh Pandit; Roshani Mishra; Sonal Sharma; Tasnim Trivedi; Zarna Patel                                              |
| EPI_ISL_9236260, EPI_ISL_9236262, EPI_ISL_9403006, EPI_ISL_9403007, EPI_ISL_9403014, EPI_ISL_9610192, EPI_ISL_9610193, EPI_ISL_9610194, EPI_ISL_9610195, EPI_ISL_9610233, EPI_ISL_9610241, EPI_ISL_9655933, EPI_ISL_9696306                                                                                                                                                                                                                                                                                                                                                                                                                                                                                                                                                                                                                                                                                                                                                                                                                                                                                                                                                                                                                                                                                                                                                                                                                                                                                                                                                                                                                                                                                                                                                                                                                                                                                                                                                                                                                                                                                                                                                                                                                                                                                                                                                                                                                                                                                                                                                                                                                                                                                                                                                                                                                                                                                                                                                             | Government Medical College, Surat                                              | Gujarat Biotechnology Research Centre                                                                                                                                                                              | Akhilesh Modi; Apurvasinh Puvar; Bhadreshsinh Gohil; Chaitanya Joshi; Disha Vora; Janvi Raval; Jaykumar Rangani; Madhvi Joshi; Netta Khandelwal; Nimesh Patel; Nitin Savaliya; Nitin Shukla; NitinShukla; Priyank Chavda; Ramesh Pandit; Roshani Mishra; Sonal Sharma; Tasnim Trivedi; Zarna Patel                             |
| EPI_ISL_9604358, EPI_ISL_9604359                                                                                                                                                                                                                                                                                                                                                                                                                                                                                                                                                                                                                                                                                                                                                                                                                                                                                                                                                                                                                                                                                                                                                                                                                                                                                                                                                                                                                                                                                                                                                                                                                                                                                                                                                                                                                                                                                                                                                                                                                                                                                                                                                                                                                                                                                                                                                                                                                                                                                                                                                                                                                                                                                                                                                                                                                                                                                                                                                        | Green Cross Genetics Lab Pvt Ltd, Ahmedabad                                    | Gujarat Biotechnology Research Centre                                                                                                                                                                              | Akhilesh Modi; Apurvasinh Puvar; Bhadreshsinh Gohil; Chaitanya Joshi; Disha Vora; Janvi Raval; Jaykumar Rangani; Madhvi Joshi; Nimesh Patel; Nitin Savaliya; NitinShukla; Priyank Chavda; Ramesh Pandit; Roshani Mishra; Sonal Sharma; Tasnim Trivedi; Umang Patel; Zarna Patel                                                |
| EPI_ISL_9236167                                                                                                                                                                                                                                                                                                                                                                                                                                                                                                                                                                                                                                                                                                                                                                                                                                                                                                                                                                                                                                                                                                                                                                                                                                                                                                                                                                                                                                                                                                                                                                                                                                                                                                                                                                                                                                                                                                                                                                                                                                                                                                                                                                                                                                                                                                                                                                                                                                                                                                                                                                                                                                                                                                                                                                                                                                                                                                                                                                         | Green Cross Pathology Laboratory, Ahmedabad                                    | Gujarat Biotechnology Research Centre                                                                                                                                                                              | Akhilesh Modi; Apurvasinh Puvar; Bhadreshsinh Gohil; Chaitanya Joshi; Disha Vora; Janvi Raval; Jaykumar Rangani; Madhvi Joshi; Narendra Patel; Nimesh Patel; Nitin Savaliya; NitinShukla; Priyank Chavda; Ramesh Pandit; Roshani Mishra; Sonal Sharma; Tasnim Trivedi; Zarna Patel                                             |
| EPI_ISL_9236234                                                                                                                                                                                                                                                                                                                                                                                                                                                                                                                                                                                                                                                                                                                                                                                                                                                                                                                                                                                                                                                                                                                                                                                                                                                                                                                                                                                                                                                                                                                                                                                                                                                                                                                                                                                                                                                                                                                                                                                                                                                                                                                                                                                                                                                                                                                                                                                                                                                                                                                                                                                                                                                                                                                                                                                                                                                                                                                                                                         | Gujarat Adani Institute of Medical Sciences, Bhuj                              | Gujarat Biotechnology Research Centre                                                                                                                                                                              | Akhilesh Modi; Apurvasinh Puvar; Bhadreshsinh Gohil; Chaitanya Joshi; Disha Vora; Janvi Raval; Jaykumar Rangani; Kanupriya; Madhvi Joshi; Nimesh Patel; Nitin Savaliya; NitinShukla; Priyank Chavda; Ramesh Pandit; Roshani Mishra; Sonal Sharma; Tasnim Trivedi; Zarna Patel                                                  |
| EPI_ISL_9402977, EPI_ISL_9402978                                                                                                                                                                                                                                                                                                                                                                                                                                                                                                                                                                                                                                                                                                                                                                                                                                                                                                                                                                                                                                                                                                                                                                                                                                                                                                                                                                                                                                                                                                                                                                                                                                                                                                                                                                                                                                                                                                                                                                                                                                                                                                                                                                                                                                                                                                                                                                                                                                                                                                                                                                                                                                                                                                                                                                                                                                                                                                                                                        | Gujarat Adani Institute of Medical Sciences, Bhuj, Gujarat                     | Gujarat Biotechnology Research Centre                                                                                                                                                                              | Akhilesh Modi; Apurvasinh Puvar; Bhadreshsinh Gohil; Chaitanya Joshi; Disha Vora; Hitesh; Janvi Raval; Jaykumar Rangani; Madhvi Joshi; Nimesh Patel; Nitin Savaliya; Nitin Shukla; Priyank Chavda; Ramesh Pandit; Roshani Mishra; Sonal Sharma; Tasnim Trivedi; Zarna Patel                                                    |
| EPI_ISL_9015874, EPI_ISL_9015877                                                                                                                                                                                                                                                                                                                                                                                                                                                                                                                                                                                                                                                                                                                                                                                                                                                                                                                                                                                                                                                                                                                                                                                                                                                                                                                                                                                                                                                                                                                                                                                                                                                                                                                                                                                                                                                                                                                                                                                                                                                                                                                                                                                                                                                                                                                                                                                                                                                                                                                                                                                                                                                                                                                                                                                                                                                                                                                                                        | HOSPITAL CAN MISSES                                                            | HOSPITAL UNIVERSITARIO SON ESPASES                                                                                                                                                                                 | Dr. Antonio Oliver; Dr. Carla López-Causapé; Dr. Gabriel Cabot; Hospital Universitario Son Espases; on behalf of Servicio de Microbiología                                                                                                                                                                                     |
| EPI_ISL_9015803, EPI_ISL_9015813, EPI_ISL_9015861, EPI_ISL_9015864, EPI_ISL_9015867, EPI_ISL_9015872, EPI_ISL_9015878                                                                                                                                                                                                                                                                                                                                                                                                                                                                                                                                                                                                                                                                                                                                                                                                                                                                                                                                                                                                                                                                                                                                                                                                                                                                                                                                                                                                                                                                                                                                                                                                                                                                                                                                                                                                                                                                                                                                                                                                                                                                                                                                                                                                                                                                                                                                                                                                                                                                                                                                                                                                                                                                                                                                                                                                                                                                   | see above                                                                      | HOSPITAL UNIVERSITARIO SON ESPASES                                                                                                                                                                                 | Dr. Antonio Oliver; Dr. Carla López-Causapé; Dr. Gabriel Cabot; Hospital Universitario Son Espases; on behalf of Servicio de Microbiología                                                                                                                                                                                     |
| EPI_ISL_8885211                                                                                                                                                                                                                                                                                                                                                                                                                                                                                                                                                                                                                                                                                                                                                                                                                                                                                                                                                                                                                                                                                                                                                                                                                                                                                                                                                                                                                                                                                                                                                                                                                                                                                                                                                                                                                                                                                                                                                                                                                                                                                                                                                                                                                                                                                                                                                                                                                                                                                                                                                                                                                                                                                                                                                                                                                                                                                                                                                                         | Hannover Medical School, Institute of Virology                                 | Hannover Medical School, Institute of Virology                                                                                                                                                                     | Lars Steinbrück                                                                                                                                                                                                                                                                                                                |
| EPI_ISL_8962276, EPI_ISL_8962511, EPI_ISL_8962567, EPI_ISL_9001997, EPI_ISL_9002121, EPI_ISL_9074819                                                                                                                                                                                                                                                                                                                                                                                                                                                                                                                                                                                                                                                                                                                                                                                                                                                                                                                                                                                                                                                                                                                                                                                                                                                                                                                                                                                                                                                                                                                                                                                                                                                                                                                                                                                                                                                                                                                                                                                                                                                                                                                                                                                                                                                                                                                                                                                                                                                                                                                                                                                                                                                                                                                                                                                                                                                                                    | Health Services Laboratories                                                   | Wellcome Sanger Institute for the COVID-19 Genomics UK (COG-UK) Consortium                                                                                                                                         | Cordelia Langford; David K. Jackson; Dominic Kwiatkowski; Ewan Harrison; Health Services Laboratories and Alex Alderton; Ian Johnston; Jeffrey Barrett; John Sillitoe on behalf of the Wellcome Sanger Institute COVID-19 Surveillance Team; Roberto Amato; Sonia Gonçalves                                                    |
| EPI_ISL_9401922                                                                                                                                                                                                                                                                                                                                                                                                                                                                                                                                                                                                                                                                                                                                                                                                                                                                                                                                                                                                                                                                                                                                                                                                                                                                                                                                                                                                                                                                                                                                                                                                                                                                                                                                                                                                                                                                                                                                                                                                                                                                                                                                                                                                                                                                                                                                                                                                                                                                                                                                                                                                                                                                                                                                                                                                                                                                                                                                                                         | Helen Joseph Hospital                                                          | National Institute for Communicable Diseases of the National Health Laboratory Service                                                                                                                             | Amoako DG; Bhiman JN; Everatt J; Ismail A; Kekana D; Mahlangu B; Mnguni A; Mohale T; Ntuli N; Scheepers C; Wolter N                                                                                                                                                                                                            |
| EPI_ISL_9087709                                                                                                                                                                                                                                                                                                                                                                                                                                                                                                                                                                                                                                                                                                                                                                                                                                                                                                                                                                                                                                                                                                                                                                                                                                                                                                                                                                                                                                                                                                                                                                                                                                                                                                                                                                                                                                                                                                                                                                                                                                                                                                                                                                                                                                                                                                                                                                                                                                                                                                                                                                                                                                                                                                                                                                                                                                                                                                                                                                         | Helix                                                                          | Centers for Disease Control and Prevention Division of Viral Diseases, Pathogen Discovery                                                                                                                          | Benjamin Rambo-Martin; Christopher Gulvick; Clinton Paden; Dakota Howard; Dhvani Batra; Duncan MacCannell; Erisa Sula; Helix CA; Jason Caravas; Kristine Lacek; Matthew Schmeer; Peter Cook; Scott Sammons; Shatavia Morrison; Tymeckia Kendall; Victoria Caban Figueroa; Yvette Unoarumhi                                     |
| EPI_ISL_9571351, EPI_ISL_9571352, EPI_ISL_9571353, EPI_ISL_9571354, EPI_ISL_9571356, EPI_ISL_9571358, EPI_ISL_9571359, EPI_ISL_9571360, EPI_ISL_9702293                                                                                                                                                                                                                                                                                                                                                                                                                                                                                                                                                                                                                                                                                                                                                                                                                                                                                                                                                                                                                                                                                                                                                                                                                                                                                                                                                                                                                                                                                                                                                                                                                                                                                                                                                                                                                                                                                                                                                                                                                                                                                                                                                                                                                                                                                                                                                                                                                                                                                                                                                                                                                                                                                                                                                                                                                                 | see above                                                                      | Helix Laboratorium                                                                                                                                                                                                 | Arie Ardiansyah Nugraha; Fajar Nur Sulistiyohadi; Hana Aparsi Pawestri; Hartanti Dian Ikawati; Kartika Dewi Puspa; Nelly Puspandari; Nur Ika Hariastuti; Putri Widia; Subangkit; Vivi Setiawaty                                                                                                                                |
| EPI_ISL_8883000                                                                                                                                                                                                                                                                                                                                                                                                                                                                                                                                                                                                                                                                                                                                                                                                                                                                                                                                                                                                                                                                                                                                                                                                                                                                                                                                                                                                                                                                                                                                                                                                                                                                                                                                                                                                                                                                                                                                                                                                                                                                                                                                                                                                                                                                                                                                                                                                                                                                                                                                                                                                                                                                                                                                                                                                                                                                                                                                                                         | Hospital Universitari Vall d'Hebron - Vall d'Hebron Institut de Recerca        | Hospital Universitari Vall d'Hebron - Vall d'Hebron Institut de Recerca                                                                                                                                            | Alejandra González-Sánchez; Andrés Antón; Ariadna Rando; Carla Castillo; Cristina Andrés; Damir García-Cehic; Josep Quer; Juliana Esperalba; Karen García; Maria Carmen Martin; Maria Gema Codina; Maria Piñana; Rodrigo Vázquez; Tomàs Pumarola                                                                               |
| EPI_ISL_9480705                                                                                                                                                                                                                                                                                                                                                                                                                                                                                                                                                                                                                                                                                                                                                                                                                                                                                                                                                                                                                                                                                                                                                                                                                                                                                                                                                                                                                                                                                                                                                                                                                                                                                                                                                                                                                                                                                                                                                                                                                                                                                                                                                                                                                                                                                                                                                                                                                                                                                                                                                                                                                                                                                                                                                                                                                                                                                                                                                                         | Hospital of Southern Norway - Kristiansand, Department of Medical Microbiology | Norwegian Institute of Public Health, Department of Virology                                                                                                                                                       | Atya R Ali; Debec Nadia; Engebretsen Serina Beate; Garcia Llorente Ignacio; Hilde Elshaug; Hilde Nordby Falkenhaus; Hilde Vollan; Jon Bråte; Kamilla Heddeland Instefjord; Karoline Bragstad; Kathrine Stene-Johansen; Line Victoria Moen; Marie Paulsen Madsen; Olav Hungnes; Pedersen Benedikte Nevjen; Rasmus Riis Kopperud |
| EPI_ISL_9384407, EPI_ISL_9384423                                                                                                                                                                                                                                                                                                                                                                                                                                                                                                                                                                                                                                                                                                                                                                                                                                                                                                                                                                                                                                                                                                                                                                                                                                                                                                                                                                                                                                                                                                                                                                                                                                                                                                                                                                                                                                                                                                                                                                                                                                                                                                                                                                                                                                                                                                                                                                                                                                                                                                                                                                                                                                                                                                                                                                                                                                                                                                                                                        | Hrvatski zavod za javno zdravstvo                                              | Hrvatski zavod za javno zdravstvo                                                                                                                                                                                  | Anita Jurić; Dragan Jurić; Irena Tabain; Ivana Ferencić; Josipa Kuzle                                                                                                                                                                                                                                                          |
| EPI_ISL_9419426, EPI_ISL_9419427, EPI_ISL_9419428, EPI_ISL_9419429, EPI_ISL_9419430, EPI_ISL_9419431, EPI_ISL_9419432, EPI_ISL_9419433, EPI_ISL_9419434, EPI_ISL_9419435, EPI_ISL_9419436, EPI_ISL_9419437, EPI_ISL_9419438, EPI_ISL_9419439, EPI_ISL_9419440, EPI_ISL_9419441, EPI_ISL_9419442, EPI_ISL_9419443, EPI_ISL_9419450, EPI_ISL_9419451, EPI_ISL_9419452, EPI_ISL_9419453, EPI_ISL_9419454, EPI_ISL_9419455, EPI_ISL_9419456, EPI_ISL_9419457, EPI_ISL_9419458, EPI_ISL_9419459, EPI_ISL_9419460, EPI_ISL_9419461, EPI_ISL_9419462, EPI_ISL_9419463, EPI_ISL_9419464, EPI_ISL_9419465, EPI_ISL_9419466, EPI_ISL_9419467, EPI_ISL_9419468, EPI_ISL_9419469, EPI_ISL_9419470, EPI_ISL_9419471, EPI_ISL_9419472, EPI_ISL_9419473, EPI_ISL_9419474, EPI_ISL_9419475, EPI_ISL_9419476, EPI_ISL_9419477, EPI_ISL_9419478, EPI_ISL_9419479, EPI_ISL_9419480, EPI_ISL_9419481, EPI_ISL_9419482, EPI_ISL_9419483, EPI_ISL_9419484, EPI_ISL_9419485, EPI_ISL_9419486, EPI_ISL_9419487, EPI_ISL_9419488, EPI_ISL_9419489, EPI_ISL_9419490, EPI_ISL_9419491, EPI_ISL_9419492, EPI_ISL_9419493, EPI_ISL_9419494, EPI_ISL_9419495, EPI_ISL_9419496, EPI_ISL_9419497, EPI_ISL_9419498, EPI_ISL_9419499, EPI_ISL_9419500, EPI_ISL_9419501, EPI_ISL_9419502, EPI_ISL_9419503, EPI_ISL_9419504, EPI_ISL_9419505, EPI_ISL_9419506, EPI_ISL_9419507, EPI_ISL_9419508, EPI_ISL_9419509, EPI_ISL_9419510, EPI_ISL_9419511, EPI_ISL_9419512, EPI_ISL_9419513, EPI_ISL_9419514, EPI_ISL_9419515, EPI_ISL_9419516, EPI_ISL_9419517, EPI_ISL_9419518, EPI_ISL_9419519, EPI_ISL_9419520, EPI_ISL_9419521, EPI_ISL_9419522, EPI_ISL_9419523, EPI_ISL_9419524, EPI_ISL_9419525, EPI_ISL_9419526, EPI_ISL_9419527, EPI_ISL_9419528, EPI_ISL_9419529, EPI_ISL_9419530, EPI_ISL_9419531, EPI_ISL_9419532, EPI_ISL_9419533, EPI_ISL_9419534, EPI_ISL_9419535, EPI_ISL_9419536, EPI_ISL_9419537, EPI_ISL_9419538, EPI_ISL_9419539, EPI_ISL_9419540, EPI_ISL_9419541, EPI_ISL_9419542, EPI_ISL_9419543, EPI_ISL_9419544, EPI_ISL_9419545, EPI_ISL_9419546, EPI_ISL_9419547, EPI_ISL_9419548, EPI_ISL_9419549, EPI_ISL_9419550, EPI_ISL_9419551, EPI_ISL_9419552, EPI_ISL_9419553, EPI_ISL_9419554, EPI_ISL_9419555, EPI_ISL_9419556, EPI_ISL_9419557, EPI_ISL_9419558, EPI_ISL_9419559, EPI_ISL_9419560, EPI_ISL_9419561, EPI_ISL_9419562, EPI_ISL_9419563, EPI_ISL_9419564, EPI_ISL_9419565, EPI_ISL_9419566, EPI_ISL_9419567, EPI_ISL_9419568, EPI_ISL_9419569, EPI_ISL_9419570, EPI_ISL_9419571, EPI_ISL_9419572, EPI_ISL_9419573, EPI_ISL_9419574, EPI_ISL_9419575, EPI_ISL_9419576, EPI_ISL_9419577, EPI_ISL_9419578, EPI_ISL_9419579, EPI_ISL_9419580, EPI_ISL_9419581, EPI_ISL_9419582, EPI_ISL_9419583, EPI_ISL_9419584, EPI_ISL_9419585, EPI_ISL_9419586, EPI_ISL_9419587, EPI_ISL_9419588, EPI_ISL_9419589, EPI_ISL_9419590, EPI_ISL_9419591, EPI_ISL_9419592, EPI_ISL_9419593, EPI_ISL_9419594, EPI_ISL_9419595, EPI_ISL_9419596, EPI_ISL_9419597, EPI_ISL_9419598, EPI_ISL_9419599, EPI_ISL_9420000 | see above                                                                      | ICMR-National Institute of Virology - INSACOG                                                                                                                                                                      | Dr. Varsha Potdar and NIC Team                                                                                                                                                                                                                                                                                                 |
| EPI_ISL_9234842, EPI_ISL_9234843, EPI_ISL_9234858                                                                                                                                                                                                                                                                                                                                                                                                                                                                                                                                                                                                                                                                                                                                                                                                                                                                                                                                                                                                                                                                                                                                                                                                                                                                                                                                                                                                                                                                                                                                                                                                                                                                                                                                                                                                                                                                                                                                                                                                                                                                                                                                                                                                                                                                                                                                                                                                                                                                                                                                                                                                                                                                                                                                                                                                                                                                                                                                       | IDSP, Jorhat                                                                   | Centre for Infectious Diseases, CSIR-NEIST                                                                                                                                                                         | G Narahari Sastry; Gayatri Gogoi; Jatin Kalita; Moirangthem G Singh; Munmi Bora; Pankaj Bharali; Romi Wahengbam; Yasmin B Tapaddar                                                                                                                                                                                             |
| EPI_ISL_9234779, EPI_ISL_9234790, EPI_ISL_9234801, EPI_ISL_9234802, EPI_ISL_9234803, EPI_ISL_9234804                                                                                                                                                                                                                                                                                                                                                                                                                                                                                                                                                                                                                                                                                                                                                                                                                                                                                                                                                                                                                                                                                                                                                                                                                                                                                                                                                                                                                                                                                                                                                                                                                                                                                                                                                                                                                                                                                                                                                                                                                                                                                                                                                                                                                                                                                                                                                                                                                                                                                                                                                                                                                                                                                                                                                                                                                                                                                    | IDSP, Kamrup Metro                                                             | Centre for Infectious Diseases, CSIR-NEIST                                                                                                                                                                         | G Narahari Sastry; Gayatri Gogoi; Jatin Kalita; Moirangthem G Singh; Munmi Bora; Pankaj Bharali; Romi Wahengbam; Yasmin B Tapaddar                                                                                                                                                                                             |
| EPI_ISL_9234870                                                                                                                                                                                                                                                                                                                                                                                                                                                                                                                                                                                                                                                                                                                                                                                                                                                                                                                                                                                                                                                                                                                                                                                                                                                                                                                                                                                                                                                                                                                                                                                                                                                                                                                                                                                                                                                                                                                                                                                                                                                                                                                                                                                                                                                                                                                                                                                                                                                                                                                                                                                                                                                                                                                                                                                                                                                                                                                                                                         | IDSP, Tinsukia                                                                 | Centre for Infectious Diseases, CSIR-NEIST                                                                                                                                                                         | G Narahari Sastry; Gayatri Gogoi; Jatin Kalita; Moirangthem G Singh; Munmi Bora; Pankaj Bharali; Romi Wahengbam; Yasmin B Tapaddar                                                                                                                                                                                             |
| EPI_ISL_9486836                                                                                                                                                                                                                                                                                                                                                                                                                                                                                                                                                                                                                                                                                                                                                                                                                                                                                                                                                                                                                                                                                                                                                                                                                                                                                                                                                                                                                                                                                                                                                                                                                                                                                                                                                                                                                                                                                                                                                                                                                                                                                                                                                                                                                                                                                                                                                                                                                                                                                                                                                                                                                                                                                                                                                                                                                                                                                                                                                                         | IHU Mediterranee Infection                                                     | IHU Mediterranee Infection                                                                                                                                                                                         | Philippe Colson et al.                                                                                                                                                                                                                                                                                                         |
| EPI_ISL_9374550, EPI_ISL_9374556, EPI_ISL_9374557, EPI_ISL_9374561, EPI_ISL_9375648                                                                                                                                                                                                                                                                                                                                                                                                                                                                                                                                                                                                                                                                                                                                                                                                                                                                                                                                                                                                                                                                                                                                                                                                                                                                                                                                                                                                                                                                                                                                                                                                                                                                                                                                                                                                                                                                                                                                                                                                                                                                                                                                                                                                                                                                                                                                                                                                                                                                                                                                                                                                                                                                                                                                                                                                                                                                                                     | ILBS                                                                           | ILBS                                                                                                                                                                                                               | Amit Pandey; Arjun Bhugra; Chhagan Bihari Sharma; Ekta Gupta; Pramod Gautam; Priya Singh; Reshu Agarwal; Shiv Kumar Sarin; Urvinder Kaur; Varun Suroliya                                                                                                                                                                       |
| EPI_ISL_9223531                                                                                                                                                                                                                                                                                                                                                                                                                                                                                                                                                                                                                                                                                                                                                                                                                                                                                                                                                                                                                                                                                                                                                                                                                                                                                                                                                                                                                                                                                                                                                                                                                                                                                                                                                                                                                                                                                                                                                                                                                                                                                                                                                                                                                                                                                                                                                                                                                                                                                                                                                                                                                                                                                                                                                                                                                                                                                                                                                                         | IMD - Institut für Medizinische Diagnostik Berlin-Potsdam                      | Robert Koch Institute                                                                                                                                                                                              |                                                                                                                                                                                                                                                                                                                                |
| EPI_ISL_9221149                                                                                                                                                                                                                                                                                                                                                                                                                                                                                                                                                                                                                                                                                                                                                                                                                                                                                                                                                                                                                                                                                                                                                                                                                                                                                                                                                                                                                                                                                                                                                                                                                                                                                                                                                                                                                                                                                                                                                                                                                                                                                                                                                                                                                                                                                                                                                                                                                                                                                                                                                                                                                                                                                                                                                                                                                                                                                                                                                                         | IMD - MVZ Labor Martinsried                                                    | Robert Koch Institute                                                                                                                                                                                              |                                                                                                                                                                                                                                                                                                                                |

|                                                                                                                                                                                                                                                                                                                                                                                                                                                                                                                                                                                                                                                                                                                                                                                                                                                                                                   |                                                                                                                                                      |                                                                                                                                                      |                                                                                                                                                                                                                                                                                                                                                                                                                           |                                                                                                                                                                                                                                                                                |
|---------------------------------------------------------------------------------------------------------------------------------------------------------------------------------------------------------------------------------------------------------------------------------------------------------------------------------------------------------------------------------------------------------------------------------------------------------------------------------------------------------------------------------------------------------------------------------------------------------------------------------------------------------------------------------------------------------------------------------------------------------------------------------------------------------------------------------------------------------------------------------------------------|------------------------------------------------------------------------------------------------------------------------------------------------------|------------------------------------------------------------------------------------------------------------------------------------------------------|---------------------------------------------------------------------------------------------------------------------------------------------------------------------------------------------------------------------------------------------------------------------------------------------------------------------------------------------------------------------------------------------------------------------------|--------------------------------------------------------------------------------------------------------------------------------------------------------------------------------------------------------------------------------------------------------------------------------|
| EPI_ISL_9215689,<br>EPI_ISL_9215737,<br>EPI_ISL_9215856,<br>EPI_ISL_9456549,<br>EPI_ISL_9456657                                                                                                                                                                                                                                                                                                                                                                                                                                                                                                                                                                                                                                                                                                                                                                                                   | IMD Labor Frankfurt                                                                                                                                  | Robert Koch Institute                                                                                                                                |                                                                                                                                                                                                                                                                                                                                                                                                                           |                                                                                                                                                                                                                                                                                |
| EPI_ISL_9720941, EPI_ISL_9720995, EPI_ISL_9721010, EPI_ISL_9721022, EPI_ISL_9721023, EPI_ISL_9721029, EPI_ISL_9721056, EPI_ISL_9721062, EPI_ISL_9721085, EPI_ISL_9721101, EPI_ISL_9721139, EPI_ISL_9721166, EPI_ISL_9721171, EPI_ISL_9721199, EPI_ISL_9721205, EPI_ISL_9721211, EPI_ISL_9721212, EPI_ISL_9721216, EPI_ISL_9721239, EPI_ISL_9721253, EPI_ISL_9721290, EPI_ISL_9721301, EPI_ISL_9721333, EPI_ISL_9721396, EPI_ISL_9721483, EPI_ISL_9721484, EPI_ISL_9721485, EPI_ISL_9721486, EPI_ISL_9721487, EPI_ISL_9721488, EPI_ISL_9721489, EPI_ISL_9721490, EPI_ISL_9721491, EPI_ISL_9721492, EPI_ISL_9721493, EPI_ISL_9721494, EPI_ISL_9721495, EPI_ISL_9721496, EPI_ISL_9721497, EPI_ISL_9721498, EPI_ISL_9721499, EPI_ISL_9721500, EPI_ISL_9721501, EPI_ISL_9721502, EPI_ISL_9721503, EPI_ISL_9721504, EPI_ISL_9721505, EPI_ISL_9721506, EPI_ISL_9721507, EPI_ISL_9721508, EPI_ISL_9721509 | see above                                                                                                                                            | INSACOG-WB                                                                                                                                           | National Institute of Biomedical Genomics - INSACOG                                                                                                                                                                                                                                                                                                                                                                       | Ajay Chakraborti; Arindam Maitra; Bhaswati Bandyopadhyay; Nidhan Kumar Biswas; Saumitra Das; Sreedhar Chinnaswamy; Tamal Ghosh                                                                                                                                                 |
| EPI_ISL_9522306,<br>EPI_ISL_9522309,<br>EPI_ISL_9528147                                                                                                                                                                                                                                                                                                                                                                                                                                                                                                                                                                                                                                                                                                                                                                                                                                           | Indira Gandhi Memorial Hospital                                                                                                                      | Indira Gandhi Memorial Hospital                                                                                                                      |                                                                                                                                                                                                                                                                                                                                                                                                                           | D. Fathmath Nazla Rafeeq; Dr. Ibrahim Afzal; Mr. Ibrahim Nishan Ahmed; Ms. Aishath Shuhudha; Ms. Aminath Shazleena Abdul Rahman; Ms. Soafy Mohamed                                                                                                                             |
| EPI_ISL_9336769,<br>EPI_ISL_9337302,<br>EPI_ISL_9383054,<br>EPI_ISL_9550075                                                                                                                                                                                                                                                                                                                                                                                                                                                                                                                                                                                                                                                                                                                                                                                                                       | Infinity Biologix                                                                                                                                    | Centers for Disease Control and Prevention<br>Division of Viral Diseases, Pathogen Discovery                                                         | Benjamin Rambo-Martin; Chirayu Goswami; Christian Bixby; Christopher Gulvick; Clinton Paden; Dakota Howard; Dhwanj Batra; Duncan MacCannell; Erisa Sula; Jason Caravas; Jonathan Schultz; Kristine Lacey; Matthew Scherer; Peter Cook; Robin Grimwood; Russ Hager; Scott Sammons; Shatavia Morrison; Tymeckia Kendall; Victoria Caban Figueroa; Yihe Wang; Yvette Unoarumhi                                               |                                                                                                                                                                                                                                                                                |
| EPI_ISL_9072489                                                                                                                                                                                                                                                                                                                                                                                                                                                                                                                                                                                                                                                                                                                                                                                                                                                                                   | Institut für Klinische Transfusionsmedizin und<br>Immunogenetik DRK Blutspendedienst Baden-<br>Württemberg                                           | Robert Koch Institute                                                                                                                                |                                                                                                                                                                                                                                                                                                                                                                                                                           |                                                                                                                                                                                                                                                                                |
| EPI_ISL_9596143,<br>EPI_ISL_9596144,<br>EPI_ISL_9596148,<br>EPI_ISL_9596149                                                                                                                                                                                                                                                                                                                                                                                                                                                                                                                                                                                                                                                                                                                                                                                                                       | Institute for Developing Science and Health Initiatives<br>(ideSHi)                                                                                  | IEDCR-icddr,b                                                                                                                                        | ASM Alamgir; Ahmed Nawsher Alam; Awlad Hossain; Dinesh Mondal; Firdausi Qadri; Hassan Afrad; Mahbubur Rahman; Manjur Hossain Khan; Md. Mahfuzur Rahman; Mohammad Enayet Hossain; Mohammad Jubair; Mohammad Shahidul Islam; Mohammed Ziaur Rahman; Moju Miah; Mustafizur Rahman; Rashedul Hasan; Razib Mazumder; Saiful Alam Shanto; Samir Kumar Saha; Senjuti Saha; Syed Muktadir Al Sium; Tahmina Shirin                 |                                                                                                                                                                                                                                                                                |
| EPI_ISL_9595604                                                                                                                                                                                                                                                                                                                                                                                                                                                                                                                                                                                                                                                                                                                                                                                                                                                                                   | Institute of Medical Science, University of Tokyo                                                                                                    | Center for Influenza and Respiratory Virus<br>Research, National Institute of Infectious Diseases<br>(NIID)                                          |                                                                                                                                                                                                                                                                                                                                                                                                                           | Emi Takashita; Hideka Miura; Masaki Imai; Seichiro Fujisaki; Seiya Yamayoshi; Yoshihiro Kawaka                                                                                                                                                                                 |
| EPI_ISL_9344148                                                                                                                                                                                                                                                                                                                                                                                                                                                                                                                                                                                                                                                                                                                                                                                                                                                                                   | Institute of Molecular and Translational Medicine /<br>Laboratory of Experimental Medicine, Faculty of<br>Medicine and Dentistry, Palacky University | Institute of Molecular and Translational Medicine /<br>Laboratory of Experimental Medicine, Faculty of<br>Medicine and Dentistry, Palacky University |                                                                                                                                                                                                                                                                                                                                                                                                                           | Barbora Blumová; Hana Jaworek; Kateřina Kubáňová; Marián Hajdúch; Rastislav Slavkovský; Vladimíra Koudeláková                                                                                                                                                                  |
| EPI_ISL_9779398,<br>EPI_ISL_9779400,<br>EPI_ISL_9779401,<br>EPI_ISL_9779402                                                                                                                                                                                                                                                                                                                                                                                                                                                                                                                                                                                                                                                                                                                                                                                                                       | Institute of Preventive Medicine                                                                                                                     | Centre for DNA Fingerprinting and Diagnostics                                                                                                        |                                                                                                                                                                                                                                                                                                                                                                                                                           | Arunkumar Karunanidhi; Ashwin Dalal; Asmita Gupta; Divya Vashishta; Murali Bashyam; Nagamani Kammili; Rupin Shelake; Vinay Donipadi                                                                                                                                            |
| EPI_ISL_8898252,<br>EPI_ISL_8898255                                                                                                                                                                                                                                                                                                                                                                                                                                                                                                                                                                                                                                                                                                                                                                                                                                                               | Institute of Virology, Medical Center, University of<br>Freiburg, Freiburg, Germany                                                                  | Institute of Virology, Clinical Virus Genomics,<br>Medical Center, University of Freiburg, Freiburg,<br>Germany                                      |                                                                                                                                                                                                                                                                                                                                                                                                                           | Jonas Fuchs; Lena Jaki; Lisa Gutbrod; Marcus Panning                                                                                                                                                                                                                           |
| EPI_ISL_9392107, EPI_ISL_9392127, EPI_ISL_9392147, EPI_ISL_9392149, EPI_ISL_9392164, EPI_ISL_9392184, EPI_ISL_9392193, EPI_ISL_9392201, EPI_ISL_9392202, EPI_ISL_9392233                                                                                                                                                                                                                                                                                                                                                                                                                                                                                                                                                                                                                                                                                                                          | see above                                                                                                                                            | Instytut Genetyki Sądowej Sp. z o.o.                                                                                                                 | 1. Tricity SARS-CoV-2 sequencing consortium:<br>University of Gdansk, Medical University of<br>Gdansk, Vaxican Ltd., Invicta Ltd. 2. National<br>Institute of Public Health - National Institute of<br>Hygiene, Warsaw, Poland                                                                                                                                                                                            | Celina Cybulska; Karolina Gackowska; Katarzyna Groth; Katarzyna Zacharczuk; Krystyna Bienkowska Szewczyk; Lukasz Rabalski; Maciej Grzybek; Maciej Kosinski; Magdalena Nowakowska; Marcin Lubocki; Małgorzata Sadkowska-Todys; Tomasz Wołkowicz                                 |
| EPI_ISL_8852941, EPI_ISL_8895779, EPI_ISL_8963759, EPI_ISL_8964123, EPI_ISL_8964413, EPI_ISL_8964423, EPI_ISL_8965486, EPI_ISL_8965747, EPI_ISL_8965879, EPI_ISL_8968935, EPI_ISL_8994042, EPI_ISL_8995870, EPI_ISL_8997700, EPI_ISL_8997729, EPI_ISL_8997853, EPI_ISL_9001301, EPI_ISL_9001368, EPI_ISL_9021406, EPI_ISL_9063253, EPI_ISL_9070624, EPI_ISL_9076523                                                                                                                                                                                                                                                                                                                                                                                                                                                                                                                               | see above                                                                                                                                            | Integrated Covid Hub North East                                                                                                                      | Wellcome Sanger Institute for the COVID-19<br>Genomics UK (COG-UK) Consortium                                                                                                                                                                                                                                                                                                                                             | Cordelia Langford; David K. Jackson; Dominik Kwiatkowski; Ewan Harrison; Ian Johnston; Integrated Covid Hub North East and Alex Alderton; Jeffrey Barrett; John Sillitoe on behalf of the Wellcome Sanger Institute COVID-19 Surveillance Team; Roberto Amato; Sonia Goncalves |
| EPI_ISL_9306076,<br>EPI_ISL_9306143,<br>EPI_ISL_9306218                                                                                                                                                                                                                                                                                                                                                                                                                                                                                                                                                                                                                                                                                                                                                                                                                                           | Israel Central Virology laboratory                                                                                                                   | Israel Central Virology laboratory                                                                                                                   |                                                                                                                                                                                                                                                                                                                                                                                                                           | Danit Sofer; Efrat Dahan Bucris; Efrat Glick-Saar; Ella Mendelson; Gideon Rechavi; Hagar Morad; Michal Mandelboim; Miranda Geva; Neta Zuckerman; Or Zilbertzan; Oran Erster; Orna Mor                                                                                          |
| EPI_ISL_9306396,<br>EPI_ISL_9306482                                                                                                                                                                                                                                                                                                                                                                                                                                                                                                                                                                                                                                                                                                                                                                                                                                                               | Jerusalem Central Laboratories                                                                                                                       | Israel Central Virology laboratory                                                                                                                   |                                                                                                                                                                                                                                                                                                                                                                                                                           | Danit Sofer; Efrat Dahan Bucris; Ella Mendelson; Evan Nachum; Hagar Morad; Julia Vainer; Maya Davidovich; Michal Mandelboim; Michal Zak; Miranda Geva; Neta Zuckerman; Or Zilbertzan; Oran Erster; Orna Mor; Rona Grossman                                                     |
| EPI_ISL_8808108,<br>EPI_ISL_8808115,<br>EPI_ISL_8808118,<br>EPI_ISL_8903528,<br>EPI_ISL_8903529                                                                                                                                                                                                                                                                                                                                                                                                                                                                                                                                                                                                                                                                                                                                                                                                   | Jessa                                                                                                                                                | Jessa                                                                                                                                                |                                                                                                                                                                                                                                                                                                                                                                                                                           | Severine Berden et al. on behalf of the Jessa_cmdLab                                                                                                                                                                                                                           |
| EPI_ISL_9618981                                                                                                                                                                                                                                                                                                                                                                                                                                                                                                                                                                                                                                                                                                                                                                                                                                                                                   | KKP Kelas 1 Soekarno-Hatta (FarmaLab)                                                                                                                | National Institute of Health Research and<br>Development                                                                                             |                                                                                                                                                                                                                                                                                                                                                                                                                           | Arie Ardiansyah Nugraha; Fajar Nur Sulistiyohadi; Hana Apsari Pawestri; Hartanti Dian Ikawati; Kartika Dewi Puspa; Nelly Puspandari; Nur Ika Hariastuti; Putri Widia; Subangkit; Vivi Setiawaty                                                                                |
| EPI_ISL_9618977                                                                                                                                                                                                                                                                                                                                                                                                                                                                                                                                                                                                                                                                                                                                                                                                                                                                                   | KKP Kelas 1 Soekarno-Hatta (iLab)                                                                                                                    | National Institute of Health Research and<br>Development                                                                                             |                                                                                                                                                                                                                                                                                                                                                                                                                           | Arie Ardiansyah Nugraha; Fajar Nur Sulistiyohadi; Hana Apsari Pawestri; Hartanti Dian Ikawati; Kartika Dewi Puspa; Nelly Puspandari; Nur Ika Hariastuti; Putri Widia; Subangkit; Vivi Setiawaty                                                                                |
| EPI_ISL_9467866,<br>EPI_ISL_9467867                                                                                                                                                                                                                                                                                                                                                                                                                                                                                                                                                                                                                                                                                                                                                                                                                                                               | KKP Kelas II Balikpapan                                                                                                                              | National Institute of Health Research and<br>Development                                                                                             |                                                                                                                                                                                                                                                                                                                                                                                                                           | Arie Ardiansyah Nugraha; Fajar Nur Sulistiyohadi; Hana Apsari Pawestri; Hartanti Dian Ikawati; Kartika Dewi Puspa; Nelly Puspandari; Nur Ika Hariastuti; Putri Widia; Subangkit; Vivi Setiawaty                                                                                |
| EPI_ISL_9213866                                                                                                                                                                                                                                                                                                                                                                                                                                                                                                                                                                                                                                                                                                                                                                                                                                                                                   | KRH Klinikum Region Hannover: Institut für Med.<br>Mikrobiologie und Krankenhaushygiene                                                              | Robert Koch Institute                                                                                                                                |                                                                                                                                                                                                                                                                                                                                                                                                                           |                                                                                                                                                                                                                                                                                |
| EPI_ISL_9390814                                                                                                                                                                                                                                                                                                                                                                                                                                                                                                                                                                                                                                                                                                                                                                                                                                                                                   | KSL Diagnostics                                                                                                                                      | University at Buffalo Genomics and Bioinformatics<br>Core                                                                                            |                                                                                                                                                                                                                                                                                                                                                                                                                           | Alyssa Pohlman; Amanda Boccolucci; Brandon Marzullo; Donald Yergeau; Jennifer Surtees; Jonathan Bard; Natalia Lamb; Norma Nowak                                                                                                                                                |
| EPI_ISL_9758092                                                                                                                                                                                                                                                                                                                                                                                                                                                                                                                                                                                                                                                                                                                                                                                                                                                                                   | Kaiser Permanente Southern California                                                                                                                | Helix                                                                                                                                                |                                                                                                                                                                                                                                                                                                                                                                                                                           | Helix; Kaiser Permanente Southern California                                                                                                                                                                                                                                   |
| EPI_ISL_9033460, EPI_ISL_9033463, EPI_ISL_9033464, EPI_ISL_9033465, EPI_ISL_9033510, EPI_ISL_9033511, EPI_ISL_9033525, EPI_ISL_9033526, EPI_ISL_9033528, EPI_ISL_9033531, EPI_ISL_9033538, EPI_ISL_9033545, EPI_ISL_9259292, EPI_ISL_9259304, EPI_ISL_9259311, EPI_ISL_9259312, EPI_ISL_9259318, EPI_ISL_9259322, EPI_ISL_9259327, EPI_ISL_9259330, EPI_ISL_9259331, EPI_ISL_9259343,                                                                                                                                                                                                                                                                                                                                                                                                                                                                                                             | see above                                                                                                                                            | Karolinska University Hospital Huddinge                                                                                                              | Karolinska University Hospital                                                                                                                                                                                                                                                                                                                                                                                            | Annika Tiveljung Lindell; Henning Onsbring; Jan Albert; Karina Hentrich; Lynda Eneh; Maria Ropat; Martin Ekman; Natalija Gerasimcik; Robert Dyrdak; Sandra Brodrosson; Shambhu Ganeshappa Aralaguppe; Tanja Normark; Tobias Allander; Valterti Wirta; Zhibing Yun              |
| EPI_ISL_8898023, EPI_ISL_8898063, EPI_ISL_8898073, EPI_ISL_9033560, EPI_ISL_9033574, EPI_ISL_9033592, EPI_ISL_9033632, EPI_ISL_9033652, EPI_ISL_9033661, EPI_ISL_9033720, EPI_ISL_9522428, EPI_ISL_9522448, EPI_ISL_9522465, EPI_ISL_9522467, EPI_ISL_9522477, EPI_ISL_9522481, EPI_ISL_9522509, EPI_ISL_9522529, EPI_ISL_9522538, EPI_ISL_9522545, EPI_ISL_9522956, EPI_ISL_9523112                                                                                                                                                                                                                                                                                                                                                                                                                                                                                                              | see above                                                                                                                                            | Karolinska University Hospital Solna                                                                                                                 | Karolinska University Hospital                                                                                                                                                                                                                                                                                                                                                                                            | Annika Tiveljung Lindell; Henning Onsbring; Jan Albert; Karina Hentrich; Lynda Eneh; Maria Ropat; Martin Ekman; Natalija Gerasimcik; Robert Dyrdak; Sandra Brodrosson; Shambhu Ganeshappa Aralaguppe; Tanja Normark; Tobias Allander; Valterti Wirta; Zhibing Yun              |
| EPI_ISL_9512092, EPI_ISL_9512093, EPI_ISL_9512094, EPI_ISL_9512096, EPI_ISL_9512101, EPI_ISL_9512108, EPI_ISL_9512110, EPI_ISL_9512114, EPI_ISL_9512115, EPI_ISL_9512117, EPI_ISL_9512119, EPI_ISL_9512122, EPI_ISL_9512124, EPI_ISL_9512168, EPI_ISL_9512180, EPI_ISL_9512211, EPI_ISL_9512214, EPI_ISL_9512229, EPI_ISL_9512243, EPI_ISL_9512258, EPI_ISL_9512263, EPI_ISL_9512279, EPI_ISL_9512321, EPI_ISL_9512330, EPI_ISL_9512348, EPI_ISL_9512355, EPI_ISL_9512364, EPI_ISL_9512378                                                                                                                                                                                                                                                                                                                                                                                                        | see above                                                                                                                                            | Kasturba Hospital Molecular Lab - INSACOG                                                                                                            | Kasturba hospital WGS                                                                                                                                                                                                                                                                                                                                                                                                     | Jayanthi Shastri; Vidushi Chitalia                                                                                                                                                                                                                                             |
| EPI_ISL_9228558                                                                                                                                                                                                                                                                                                                                                                                                                                                                                                                                                                                                                                                                                                                                                                                                                                                                                   | Kerckhoff-Klinik GmbH                                                                                                                                | Robert Koch Institute                                                                                                                                |                                                                                                                                                                                                                                                                                                                                                                                                                           |                                                                                                                                                                                                                                                                                |
| EPI_ISL_9594534,<br>EPI_ISL_9594535                                                                                                                                                                                                                                                                                                                                                                                                                                                                                                                                                                                                                                                                                                                                                                                                                                                               | Khulna Medical College, Khulna                                                                                                                       | Child Health Research Foundation                                                                                                                     | ASM Alamgir; Ahmed Nawsher Alam; CHRf Bangladesh Genomics Team; Dinesh Mondal; Firdausi Qadri; Hassan Afrad; Mahbubur Rahman; Manjur Hossain Khan; Mohammad Enayet Hossain; Mohammad Jubair; Mohammad Shahidul Islam; Mohammed Ziaur Rahman; Mustafizur Rahman; Razib Mazumder; Samir Kumar Saha; Senjuti Saha; Shahnaz Pervin; Tahmina Shirin                                                                            |                                                                                                                                                                                                                                                                                |
| EPI_ISL_9244097, EPI_ISL_9244150, EPI_ISL_9244151, EPI_ISL_9244152, EPI_ISL_9244153, EPI_ISL_9244154, EPI_ISL_9244155, EPI_ISL_9244156, EPI_ISL_9244157, EPI_ISL_9244158, EPI_ISL_9244159, EPI_ISL_9244160, EPI_ISL_9244161, EPI_ISL_9244162, EPI_ISL_9244163, EPI_ISL_9244164, EPI_ISL_9244165, EPI_ISL_9244166, EPI_ISL_9244168, EPI_ISL_9244169, EPI_ISL_9244220, EPI_ISL_9244221, EPI_ISL_9244222, EPI_ISL_9244223, EPI_ISL_9244224, EPI_ISL_9244225, EPI_ISL_9244226, EPI_ISL_9244323, EPI_ISL_9244326, EPI_ISL_9244327, EPI_ISL_9244328, EPI_ISL_9244329, EPI_ISL_9244330, EPI_ISL_9244331, EPI_ISL_9244332, EPI_ISL_9244337, EPI_ISL_9244338, EPI_ISL_9244339, EPI_ISL_9244340, EPI_ISL_9244342, EPI_ISL_9244428                                                                                                                                                                           | see above                                                                                                                                            | King George's Medical University                                                                                                                     | CSIR-National Botanical Research Institute                                                                                                                                                                                                                                                                                                                                                                                | Amita Jain; Babita; Priti Prasad; Samir V Sawant; Shantanu Prakash; Sumit K Bag; Suruchi Shukla; Tripti Rungta                                                                                                                                                                 |
| EPI_ISL_9110615, EPI_ISL_9110644, EPI_ISL_9110652, EPI_ISL_9110655, EPI_ISL_9110667, EPI_ISL_9110674, EPI_ISL_9110710, EPI_ISL_9110735, EPI_ISL_9110781                                                                                                                                                                                                                                                                                                                                                                                                                                                                                                                                                                                                                                                                                                                                           | see above                                                                                                                                            | Klinikum Ernst von Bergmann gemeinnützige GmbH -<br>stationärer Bereich                                                                              | Robert Koch Institute                                                                                                                                                                                                                                                                                                                                                                                                     |                                                                                                                                                                                                                                                                                |
| EPI_ISL_9596158,<br>EPI_ISL_9596159                                                                                                                                                                                                                                                                                                                                                                                                                                                                                                                                                                                                                                                                                                                                                                                                                                                               | Kushtia Medical College, Kushtia                                                                                                                     | IEDCR-icddr,b                                                                                                                                        | ASM Alamgir; Ahmed Nawsher Alam; Awlad Hossain; Dinesh Mondal; Firdausi Qadri; Hassan Afrad; Mahbubur Rahman; Manjur Hossain Khan; Md. Mahfuzur Rahman; Mohammad Enayet Hossain; Mohammad Jubair; Mohammad Shahidul Islam; Mohammed Ziaur Rahman; Moju Miah; Mustafizur Rahman; Rashedul Hasan; Razib Mazumder; Saiful Alam Shanto; Samir Kumar Saha; Senjuti Saha; Sharmila Aftab; Syed Muktadir Al Sium; Tahmina Shirin |                                                                                                                                                                                                                                                                                |
| EPI_ISL_9107202,<br>EPI_ISL_9107214,<br>EPI_ISL_9210322,<br>EPI_ISL_9210402,<br>EPI_ISL_9457142,<br>EPI_ISL_9457997                                                                                                                                                                                                                                                                                                                                                                                                                                                                                                                                                                                                                                                                                                                                                                               | LADR Zentrallabor DR. Kramer & Kollegen Geesthacht                                                                                                   | Robert Koch Institute                                                                                                                                |                                                                                                                                                                                                                                                                                                                                                                                                                           |                                                                                                                                                                                                                                                                                |

|                                                                                                                                                                                                                                                                                                                                                                                                                                                                                                                                                                                                                                                                                                                                                                                                                                                                                                                                                                                                                                                                                                                                                                                                                                                                                                                                                                                                                                                                                                                                                                                                                                                                                                                                                                                                                                                                                                                                                                                                                                                                                                                                                                                                                                                                                                                                                                                                                                                                                                                                                                                                                                                                                                                                                                                                                                                                                                                                                                                                                                                                                                                                                                                                                                                                                                                                                                                                                                                                                                                                                                                                                                                                                                                                                                                                                                                                                                                                                                                                                                                                                                                                                                                                                                                                                                                                                                                                                                                                             |                                                                                                           |                                                                                                                                                                                                                    |                                                                                                                                                                                                                                                                                   |
|-----------------------------------------------------------------------------------------------------------------------------------------------------------------------------------------------------------------------------------------------------------------------------------------------------------------------------------------------------------------------------------------------------------------------------------------------------------------------------------------------------------------------------------------------------------------------------------------------------------------------------------------------------------------------------------------------------------------------------------------------------------------------------------------------------------------------------------------------------------------------------------------------------------------------------------------------------------------------------------------------------------------------------------------------------------------------------------------------------------------------------------------------------------------------------------------------------------------------------------------------------------------------------------------------------------------------------------------------------------------------------------------------------------------------------------------------------------------------------------------------------------------------------------------------------------------------------------------------------------------------------------------------------------------------------------------------------------------------------------------------------------------------------------------------------------------------------------------------------------------------------------------------------------------------------------------------------------------------------------------------------------------------------------------------------------------------------------------------------------------------------------------------------------------------------------------------------------------------------------------------------------------------------------------------------------------------------------------------------------------------------------------------------------------------------------------------------------------------------------------------------------------------------------------------------------------------------------------------------------------------------------------------------------------------------------------------------------------------------------------------------------------------------------------------------------------------------------------------------------------------------------------------------------------------------------------------------------------------------------------------------------------------------------------------------------------------------------------------------------------------------------------------------------------------------------------------------------------------------------------------------------------------------------------------------------------------------------------------------------------------------------------------------------------------------------------------------------------------------------------------------------------------------------------------------------------------------------------------------------------------------------------------------------------------------------------------------------------------------------------------------------------------------------------------------------------------------------------------------------------------------------------------------------------------------------------------------------------------------------------------------------------------------------------------------------------------------------------------------------------------------------------------------------------------------------------------------------------------------------------------------------------------------------------------------------------------------------------------------------------------------------------------------------------------------------------------------------------------------|-----------------------------------------------------------------------------------------------------------|--------------------------------------------------------------------------------------------------------------------------------------------------------------------------------------------------------------------|-----------------------------------------------------------------------------------------------------------------------------------------------------------------------------------------------------------------------------------------------------------------------------------|
| EPI_ISL_9402120,<br>EPI_ISL_9402127,<br>EPI_ISL_9402128                                                                                                                                                                                                                                                                                                                                                                                                                                                                                                                                                                                                                                                                                                                                                                                                                                                                                                                                                                                                                                                                                                                                                                                                                                                                                                                                                                                                                                                                                                                                                                                                                                                                                                                                                                                                                                                                                                                                                                                                                                                                                                                                                                                                                                                                                                                                                                                                                                                                                                                                                                                                                                                                                                                                                                                                                                                                                                                                                                                                                                                                                                                                                                                                                                                                                                                                                                                                                                                                                                                                                                                                                                                                                                                                                                                                                                                                                                                                                                                                                                                                                                                                                                                                                                                                                                                                                                                                                     | LANCET                                                                                                    | National Institute for Communicable Diseases of the National Health Laboratory Service                                                                                                                             | Amoako DG; Bhiman JN; Everatt J; Ismail A; Kekana D; Mahiangu B; Mnguni A; Mohale T; Ntuli N; Scheepers C; Wolter N                                                                                                                                                               |
| EPI_ISL_9571408,<br>EPI_ISL_9571409,<br>EPI_ISL_9571412                                                                                                                                                                                                                                                                                                                                                                                                                                                                                                                                                                                                                                                                                                                                                                                                                                                                                                                                                                                                                                                                                                                                                                                                                                                                                                                                                                                                                                                                                                                                                                                                                                                                                                                                                                                                                                                                                                                                                                                                                                                                                                                                                                                                                                                                                                                                                                                                                                                                                                                                                                                                                                                                                                                                                                                                                                                                                                                                                                                                                                                                                                                                                                                                                                                                                                                                                                                                                                                                                                                                                                                                                                                                                                                                                                                                                                                                                                                                                                                                                                                                                                                                                                                                                                                                                                                                                                                                                     | Lab Klinik Utama Karunia                                                                                  | National Institute of Health Research and Development                                                                                                                                                              | Arie Ardiansyah Nugraha; Fajar Nur Sulistyohadi; Hana Aparsi Pawestri; Hartanti Dian Ikawati; Kartika Dewi Puspa; Nelly Puspandari; Nur Ika Hariastuti; Puri Widia; Subangkit; Vivi Setiawaty                                                                                     |
| EPI_ISL_8826254, EPI_ISL_8826262, EPI_ISL_8826318, EPI_ISL_9210192, EPI_ISL_9210354, EPI_ISL_9210475, EPI_ISL_9210500, EPI_ISL_9210505, EPI_ISL_9210509, EPI_ISL_9210520, EPI_ISL_9210529, EPI_ISL_9210547, EPI_ISL_9210588, EPI_ISL_9210827                                                                                                                                                                                                                                                                                                                                                                                                                                                                                                                                                                                                                                                                                                                                                                                                                                                                                                                                                                                                                                                                                                                                                                                                                                                                                                                                                                                                                                                                                                                                                                                                                                                                                                                                                                                                                                                                                                                                                                                                                                                                                                                                                                                                                                                                                                                                                                                                                                                                                                                                                                                                                                                                                                                                                                                                                                                                                                                                                                                                                                                                                                                                                                                                                                                                                                                                                                                                                                                                                                                                                                                                                                                                                                                                                                                                                                                                                                                                                                                                                                                                                                                                                                                                                                | see above                                                                                                 | see above                                                                                                                                                                                                          | see above                                                                                                                                                                                                                                                                         |
| EPI_ISL_9570623                                                                                                                                                                                                                                                                                                                                                                                                                                                                                                                                                                                                                                                                                                                                                                                                                                                                                                                                                                                                                                                                                                                                                                                                                                                                                                                                                                                                                                                                                                                                                                                                                                                                                                                                                                                                                                                                                                                                                                                                                                                                                                                                                                                                                                                                                                                                                                                                                                                                                                                                                                                                                                                                                                                                                                                                                                                                                                                                                                                                                                                                                                                                                                                                                                                                                                                                                                                                                                                                                                                                                                                                                                                                                                                                                                                                                                                                                                                                                                                                                                                                                                                                                                                                                                                                                                                                                                                                                                                             | Labo Analyses Med                                                                                         | National Reference Center for Viruses of Respiratory Infections, Institut Pasteur, Paris                                                                                                                           | Angela Brisebarre; Camille Capel; Christophe Malabat; Corinne Maurfas; Etienne Simon-Lorière; Frédéric Lemoine; Julien Fumeu; Louise Lefrançois; Marion Barbet; Maud Vanpeene; Méline Bizard; Slim El Khiair; Sophie ZAFFREYA; Sylvie Behilli; Sylvie Van der Werf; Vincent Enauf |
| EPI_ISL_9489304, EPI_ISL_9489309, EPI_ISL_9489322, EPI_ISL_9489329, EPI_ISL_9489334, EPI_ISL_9489338, EPI_ISL_9489341, EPI_ISL_9489342, EPI_ISL_9489343, EPI_ISL_9489346, EPI_ISL_9489347, EPI_ISL_9665082, EPI_ISL_9665091, EPI_ISL_9665098, EPI_ISL_9665113, EPI_ISL_9665120, EPI_ISL_9665173                                                                                                                                                                                                                                                                                                                                                                                                                                                                                                                                                                                                                                                                                                                                                                                                                                                                                                                                                                                                                                                                                                                                                                                                                                                                                                                                                                                                                                                                                                                                                                                                                                                                                                                                                                                                                                                                                                                                                                                                                                                                                                                                                                                                                                                                                                                                                                                                                                                                                                                                                                                                                                                                                                                                                                                                                                                                                                                                                                                                                                                                                                                                                                                                                                                                                                                                                                                                                                                                                                                                                                                                                                                                                                                                                                                                                                                                                                                                                                                                                                                                                                                                                                             | see above                                                                                                 | see above                                                                                                                                                                                                          | see above                                                                                                                                                                                                                                                                         |
| EPI_ISL_9212597,<br>EPI_ISL_9220964                                                                                                                                                                                                                                                                                                                                                                                                                                                                                                                                                                                                                                                                                                                                                                                                                                                                                                                                                                                                                                                                                                                                                                                                                                                                                                                                                                                                                                                                                                                                                                                                                                                                                                                                                                                                                                                                                                                                                                                                                                                                                                                                                                                                                                                                                                                                                                                                                                                                                                                                                                                                                                                                                                                                                                                                                                                                                                                                                                                                                                                                                                                                                                                                                                                                                                                                                                                                                                                                                                                                                                                                                                                                                                                                                                                                                                                                                                                                                                                                                                                                                                                                                                                                                                                                                                                                                                                                                                         | Labor Dr. Heidrich & Kollegen MVZ GmbH Hamburg                                                            | Charité Universitätsmedizin Berlin, Institut für Virologie/Labor Berlin                                                                                                                                            | Barbara Mühlemann; Christian Drosten; Christine Stephan; Peter Menzel; Rolf Schwarzer; Terry Jones; Victor M Corman                                                                                                                                                               |
| EPI_ISL_9211987, EPI_ISL_9219000, EPI_ISL_9219003, EPI_ISL_9219005, EPI_ISL_9219045, EPI_ISL_9461905, EPI_ISL_9461908, EPI_ISL_9461924, EPI_ISL_9461932                                                                                                                                                                                                                                                                                                                                                                                                                                                                                                                                                                                                                                                                                                                                                                                                                                                                                                                                                                                                                                                                                                                                                                                                                                                                                                                                                                                                                                                                                                                                                                                                                                                                                                                                                                                                                                                                                                                                                                                                                                                                                                                                                                                                                                                                                                                                                                                                                                                                                                                                                                                                                                                                                                                                                                                                                                                                                                                                                                                                                                                                                                                                                                                                                                                                                                                                                                                                                                                                                                                                                                                                                                                                                                                                                                                                                                                                                                                                                                                                                                                                                                                                                                                                                                                                                                                     | see above                                                                                                 | see above                                                                                                                                                                                                          | see above                                                                                                                                                                                                                                                                         |
| EPI_ISL_9216644, EPI_ISL_9216646, EPI_ISL_9216662, EPI_ISL_9223752, EPI_ISL_9223757, EPI_ISL_9223776, EPI_ISL_9228669, EPI_ISL_9228679, EPI_ISL_9229691, EPI_ISL_9446383, EPI_ISL_9452472, EPI_ISL_9459261                                                                                                                                                                                                                                                                                                                                                                                                                                                                                                                                                                                                                                                                                                                                                                                                                                                                                                                                                                                                                                                                                                                                                                                                                                                                                                                                                                                                                                                                                                                                                                                                                                                                                                                                                                                                                                                                                                                                                                                                                                                                                                                                                                                                                                                                                                                                                                                                                                                                                                                                                                                                                                                                                                                                                                                                                                                                                                                                                                                                                                                                                                                                                                                                                                                                                                                                                                                                                                                                                                                                                                                                                                                                                                                                                                                                                                                                                                                                                                                                                                                                                                                                                                                                                                                                  | see above                                                                                                 | see above                                                                                                                                                                                                          | see above                                                                                                                                                                                                                                                                         |
| EPI_ISL_9181504,<br>EPI_ISL_9181712,<br>EPI_ISL_9181713,<br>EPI_ISL_9181718                                                                                                                                                                                                                                                                                                                                                                                                                                                                                                                                                                                                                                                                                                                                                                                                                                                                                                                                                                                                                                                                                                                                                                                                                                                                                                                                                                                                                                                                                                                                                                                                                                                                                                                                                                                                                                                                                                                                                                                                                                                                                                                                                                                                                                                                                                                                                                                                                                                                                                                                                                                                                                                                                                                                                                                                                                                                                                                                                                                                                                                                                                                                                                                                                                                                                                                                                                                                                                                                                                                                                                                                                                                                                                                                                                                                                                                                                                                                                                                                                                                                                                                                                                                                                                                                                                                                                                                                 | Laboratoire national de sante, Microbiology, Virology                                                     | Laboratoire national de sante, Microbiology, Microbial Genomics Platform                                                                                                                                           | Anke Wienecke-Baldacchino; Catherine Ragimbeau; Elodie Solario; Fatu Djabi; Jessica Tapp; Lise Pignon; Raoul Salmon; Sibel Berger; Tamir Abdelrahman; Trung Nguyen Nguyen; Virginie Jover                                                                                         |
| EPI_ISL_9111598,<br>EPI_ISL_9111620,<br>EPI_ISL_9111627                                                                                                                                                                                                                                                                                                                                                                                                                                                                                                                                                                                                                                                                                                                                                                                                                                                                                                                                                                                                                                                                                                                                                                                                                                                                                                                                                                                                                                                                                                                                                                                                                                                                                                                                                                                                                                                                                                                                                                                                                                                                                                                                                                                                                                                                                                                                                                                                                                                                                                                                                                                                                                                                                                                                                                                                                                                                                                                                                                                                                                                                                                                                                                                                                                                                                                                                                                                                                                                                                                                                                                                                                                                                                                                                                                                                                                                                                                                                                                                                                                                                                                                                                                                                                                                                                                                                                                                                                     | Laboratoria Medyczne Bruss grupa ALAB sp. z o.o.; Medyczne Laboratorium Diagnostyczne, Pracownia Genetyki | 1. Tricity SARS-CoV-2 sequencing consortium; University of Gdansk, Medical University of Gdansk, Vaxican Ltd., Invicta Ltd. 2. National Institute of Public Health - National Institute of Hygiene, Warsaw, Poland | Celina Cybulska; Karolina Gackowska; Katarzyna Groth; Katarzyna Zacharczuk; Krystyna Bienkowska Szewczyk; Lukasz Rabalski; Maciej Grzybek; Maciej Kosinski; Magdalena Nowakowska; Marcin Lubocki; Małgorzata Sadkowska-Todys; Tomasz Wolkowicz                                    |
| EPI_ISL_9264758,<br>EPI_ISL_9264760,<br>EPI_ISL_9264776                                                                                                                                                                                                                                                                                                                                                                                                                                                                                                                                                                                                                                                                                                                                                                                                                                                                                                                                                                                                                                                                                                                                                                                                                                                                                                                                                                                                                                                                                                                                                                                                                                                                                                                                                                                                                                                                                                                                                                                                                                                                                                                                                                                                                                                                                                                                                                                                                                                                                                                                                                                                                                                                                                                                                                                                                                                                                                                                                                                                                                                                                                                                                                                                                                                                                                                                                                                                                                                                                                                                                                                                                                                                                                                                                                                                                                                                                                                                                                                                                                                                                                                                                                                                                                                                                                                                                                                                                     | Laboratorio CQRC                                                                                          | CQRC_QUALITY CONTROL CHEMICAL BIOLOGICAL RISK_AOOR Villa Sofia Cerverlo Palermo                                                                                                                                    | Brunacci G.; Contino F.; Di Gaudio F.                                                                                                                                                                                                                                             |
| EPI_ISL_9534249                                                                                                                                                                                                                                                                                                                                                                                                                                                                                                                                                                                                                                                                                                                                                                                                                                                                                                                                                                                                                                                                                                                                                                                                                                                                                                                                                                                                                                                                                                                                                                                                                                                                                                                                                                                                                                                                                                                                                                                                                                                                                                                                                                                                                                                                                                                                                                                                                                                                                                                                                                                                                                                                                                                                                                                                                                                                                                                                                                                                                                                                                                                                                                                                                                                                                                                                                                                                                                                                                                                                                                                                                                                                                                                                                                                                                                                                                                                                                                                                                                                                                                                                                                                                                                                                                                                                                                                                                                                             | Laboratorium Analiz Lekarskich Alab Bydgoszcz                                                             | 1. Tricity SARS-CoV-2 sequencing consortium; University of Gdansk, Medical University of Gdansk, Vaxican Ltd., Invicta Ltd. 2. National Institute of Public Health - National Institute of Hygiene, Warsaw, Poland | Celina Cybulska; Karolina Gackowska; Katarzyna Groth; Katarzyna Zacharczuk; Krystyna Bienkowska Szewczyk; Lukasz Rabalski; Maciej Grzybek; Maciej Kosinski; Magdalena Nowakowska; Marcin Lubocki; Małgorzata Sadkowska-Todys; Tomasz Wolkowicz                                    |
| EPI_ISL_9352794                                                                                                                                                                                                                                                                                                                                                                                                                                                                                                                                                                                                                                                                                                                                                                                                                                                                                                                                                                                                                                                                                                                                                                                                                                                                                                                                                                                                                                                                                                                                                                                                                                                                                                                                                                                                                                                                                                                                                                                                                                                                                                                                                                                                                                                                                                                                                                                                                                                                                                                                                                                                                                                                                                                                                                                                                                                                                                                                                                                                                                                                                                                                                                                                                                                                                                                                                                                                                                                                                                                                                                                                                                                                                                                                                                                                                                                                                                                                                                                                                                                                                                                                                                                                                                                                                                                                                                                                                                                             | Laboratorium Diagnostyczne Centrum Medyczne LuxMed                                                        | Wojewodzka Stacja Sanitarno-Epidemiologiczna w Rzeszowie, Laboratorium Diagnostyki Medycznej                                                                                                                       | Anna Nowakowska; Karolina Ostrowska; Katarzyna Wilk; Marzena Baranowska                                                                                                                                                                                                           |
| EPI_ISL_8770569                                                                                                                                                                                                                                                                                                                                                                                                                                                                                                                                                                                                                                                                                                                                                                                                                                                                                                                                                                                                                                                                                                                                                                                                                                                                                                                                                                                                                                                                                                                                                                                                                                                                                                                                                                                                                                                                                                                                                                                                                                                                                                                                                                                                                                                                                                                                                                                                                                                                                                                                                                                                                                                                                                                                                                                                                                                                                                                                                                                                                                                                                                                                                                                                                                                                                                                                                                                                                                                                                                                                                                                                                                                                                                                                                                                                                                                                                                                                                                                                                                                                                                                                                                                                                                                                                                                                                                                                                                                             | Laboratorium Diagnostyki Medycznej                                                                        | Wojewodzka Stacja Sanitarno-Epidemiologiczna w Gdańsku                                                                                                                                                             | Barbara Skórczewska; Gabriela Rutkowska; Karolina Smarzyńska                                                                                                                                                                                                                      |
| EPI_ISL_9301291                                                                                                                                                                                                                                                                                                                                                                                                                                                                                                                                                                                                                                                                                                                                                                                                                                                                                                                                                                                                                                                                                                                                                                                                                                                                                                                                                                                                                                                                                                                                                                                                                                                                                                                                                                                                                                                                                                                                                                                                                                                                                                                                                                                                                                                                                                                                                                                                                                                                                                                                                                                                                                                                                                                                                                                                                                                                                                                                                                                                                                                                                                                                                                                                                                                                                                                                                                                                                                                                                                                                                                                                                                                                                                                                                                                                                                                                                                                                                                                                                                                                                                                                                                                                                                                                                                                                                                                                                                                             | Laboratorium Medyczne Synevo Wrocław                                                                      | Wojewodzka Stacja Sanitarno-Epidemiologiczna w Gorzowie Wielkopolskim                                                                                                                                              | Elzbieta Justynska; Klaudia Kobenzda-Włodarczak; Patrycja Faberska; Patrycja Rakowska and Marek Margol; Renata Siegel                                                                                                                                                             |
| EPI_ISL_8887311                                                                                                                                                                                                                                                                                                                                                                                                                                                                                                                                                                                                                                                                                                                                                                                                                                                                                                                                                                                                                                                                                                                                                                                                                                                                                                                                                                                                                                                                                                                                                                                                                                                                                                                                                                                                                                                                                                                                                                                                                                                                                                                                                                                                                                                                                                                                                                                                                                                                                                                                                                                                                                                                                                                                                                                                                                                                                                                                                                                                                                                                                                                                                                                                                                                                                                                                                                                                                                                                                                                                                                                                                                                                                                                                                                                                                                                                                                                                                                                                                                                                                                                                                                                                                                                                                                                                                                                                                                                             | Laboratorium RS Pusat Pertamina                                                                           | Genomik Solidaritas Indonesia Laboratorium                                                                                                                                                                         | Aisyi Sakina Rifani; Annisa Muthiah Sukirman; Anuraj Shankar; Ariel Pradipta; Carissa Sintca Wijaya; Dian Tri Wahyudi; Gracia Felias Eno Korompis; Hitanan Masyhuri; Louisa Markus; Meutia Ayuputeri Kumaheri; Randy Nusrianto; Stefanus Bernard                                  |
| EPI_ISL_9017521,<br>EPI_ISL_9019539                                                                                                                                                                                                                                                                                                                                                                                                                                                                                                                                                                                                                                                                                                                                                                                                                                                                                                                                                                                                                                                                                                                                                                                                                                                                                                                                                                                                                                                                                                                                                                                                                                                                                                                                                                                                                                                                                                                                                                                                                                                                                                                                                                                                                                                                                                                                                                                                                                                                                                                                                                                                                                                                                                                                                                                                                                                                                                                                                                                                                                                                                                                                                                                                                                                                                                                                                                                                                                                                                                                                                                                                                                                                                                                                                                                                                                                                                                                                                                                                                                                                                                                                                                                                                                                                                                                                                                                                                                         | Laboratorium Rumah Sakit Pusat Pertamina                                                                  | Genomik Solidaritas Indonesia Laboratorium                                                                                                                                                                         | Aisyi Sakina Rifani; Annisa Muthiah Sukirman; Anuraj Shankar; Ariel Pradipta; Carissa Sintca Wijaya; Dian Tri Wahyudi; Esti Rahayuning Tias; Gracia Felias Eno Korompis; Louisa Markus; Meutia Ayuputeri Kumaheri; Rengga; Rengga S; Stefanus Bernard                             |
| EPI_ISL_9190789, EPI_ISL_9193896, EPI_ISL_9194550, EPI_ISL_9342695, EPI_ISL_9342747, EPI_ISL_9345610, EPI_ISL_9345616, EPI_ISL_9465111                                                                                                                                                                                                                                                                                                                                                                                                                                                                                                                                                                                                                                                                                                                                                                                                                                                                                                                                                                                                                                                                                                                                                                                                                                                                                                                                                                                                                                                                                                                                                                                                                                                                                                                                                                                                                                                                                                                                                                                                                                                                                                                                                                                                                                                                                                                                                                                                                                                                                                                                                                                                                                                                                                                                                                                                                                                                                                                                                                                                                                                                                                                                                                                                                                                                                                                                                                                                                                                                                                                                                                                                                                                                                                                                                                                                                                                                                                                                                                                                                                                                                                                                                                                                                                                                                                                                      | see above                                                                                                 | see above                                                                                                                                                                                                          | see above                                                                                                                                                                                                                                                                         |
| EPI_ISL_9793249                                                                                                                                                                                                                                                                                                                                                                                                                                                                                                                                                                                                                                                                                                                                                                                                                                                                                                                                                                                                                                                                                                                                                                                                                                                                                                                                                                                                                                                                                                                                                                                                                                                                                                                                                                                                                                                                                                                                                                                                                                                                                                                                                                                                                                                                                                                                                                                                                                                                                                                                                                                                                                                                                                                                                                                                                                                                                                                                                                                                                                                                                                                                                                                                                                                                                                                                                                                                                                                                                                                                                                                                                                                                                                                                                                                                                                                                                                                                                                                                                                                                                                                                                                                                                                                                                                                                                                                                                                                             | Laboratory of Genomics and Bioinformatics, Comenius University Science Park                               | Laboratory of Genomics and Bioinformatics, Comenius University Science Park                                                                                                                                        | Anna Kaliňáková; Barbora Kotvasová; Diana Rusňáková; Jakub Styk; Jaroslav Budiš; Lucia Ševčíková; Michaela Jakubková Forgáčová; Miroslav Böhmer; Nikola Lipková; Pavol Mišenko; Tatiana Sedláčková; Terézia Vrabčová; Tomáš Szemes                                                |
| EPI_ISL_9015560                                                                                                                                                                                                                                                                                                                                                                                                                                                                                                                                                                                                                                                                                                                                                                                                                                                                                                                                                                                                                                                                                                                                                                                                                                                                                                                                                                                                                                                                                                                                                                                                                                                                                                                                                                                                                                                                                                                                                                                                                                                                                                                                                                                                                                                                                                                                                                                                                                                                                                                                                                                                                                                                                                                                                                                                                                                                                                                                                                                                                                                                                                                                                                                                                                                                                                                                                                                                                                                                                                                                                                                                                                                                                                                                                                                                                                                                                                                                                                                                                                                                                                                                                                                                                                                                                                                                                                                                                                                             | Laboratory of Medical Microbiology and Pathology, PAMM                                                    | Laboratory of Medical Microbiology and Pathology, PAMM                                                                                                                                                             | Christel van Herk; Inge Briels; Jeroen van de Bovenkamp; Maaike Broeders; Pleunie van Alphen                                                                                                                                                                                      |
| EPI_ISL_9236223                                                                                                                                                                                                                                                                                                                                                                                                                                                                                                                                                                                                                                                                                                                                                                                                                                                                                                                                                                                                                                                                                                                                                                                                                                                                                                                                                                                                                                                                                                                                                                                                                                                                                                                                                                                                                                                                                                                                                                                                                                                                                                                                                                                                                                                                                                                                                                                                                                                                                                                                                                                                                                                                                                                                                                                                                                                                                                                                                                                                                                                                                                                                                                                                                                                                                                                                                                                                                                                                                                                                                                                                                                                                                                                                                                                                                                                                                                                                                                                                                                                                                                                                                                                                                                                                                                                                                                                                                                                             | Lambda Therapeutic Research, Ahmedabad                                                                    | Gujarat Biotechnology Research Centre                                                                                                                                                                              | Akhilesh Modi; Apurvasinh Puvar; Bhadrreshsinh Gohil; Chaitanya Joshi; Disha Vora; Janvi Raval; Jaykumar Rangani; Madhvi Joshi; Nimesh Patel; Nitin Savaliya; Nitin Shukla; Priyank Chavda; Ramesh Pandit; Roshani Mishra; Sonal Sharma; Tasnim Trivedi; Vijay Rajput; Zama Patel |
| EPI_ISL_9573296,<br>EPI_ISL_9573299,<br>EPI_ISL_9573301                                                                                                                                                                                                                                                                                                                                                                                                                                                                                                                                                                                                                                                                                                                                                                                                                                                                                                                                                                                                                                                                                                                                                                                                                                                                                                                                                                                                                                                                                                                                                                                                                                                                                                                                                                                                                                                                                                                                                                                                                                                                                                                                                                                                                                                                                                                                                                                                                                                                                                                                                                                                                                                                                                                                                                                                                                                                                                                                                                                                                                                                                                                                                                                                                                                                                                                                                                                                                                                                                                                                                                                                                                                                                                                                                                                                                                                                                                                                                                                                                                                                                                                                                                                                                                                                                                                                                                                                                     | Lancet                                                                                                    | NHLS/UCT                                                                                                                                                                                                           | Arash Irzadeh; Bruna Galvao; Caroly Williamson; Deelan Doolabh; Diana Hardie; Gert Marais; Innocent Mudau; Luicer Olubayo; Lynn Tyers; Marvin Hsiao; Nokuzola Mbehe; Rageema Joseph; Stephen Korsman                                                                              |
| EPI_ISL_9529448                                                                                                                                                                                                                                                                                                                                                                                                                                                                                                                                                                                                                                                                                                                                                                                                                                                                                                                                                                                                                                                                                                                                                                                                                                                                                                                                                                                                                                                                                                                                                                                                                                                                                                                                                                                                                                                                                                                                                                                                                                                                                                                                                                                                                                                                                                                                                                                                                                                                                                                                                                                                                                                                                                                                                                                                                                                                                                                                                                                                                                                                                                                                                                                                                                                                                                                                                                                                                                                                                                                                                                                                                                                                                                                                                                                                                                                                                                                                                                                                                                                                                                                                                                                                                                                                                                                                                                                                                                                             | Leids Universitair Medisch Centrum                                                                        | Leiden University Medical Center                                                                                                                                                                                   | Stefan Boers                                                                                                                                                                                                                                                                      |
| EPI_ISL_9123074                                                                                                                                                                                                                                                                                                                                                                                                                                                                                                                                                                                                                                                                                                                                                                                                                                                                                                                                                                                                                                                                                                                                                                                                                                                                                                                                                                                                                                                                                                                                                                                                                                                                                                                                                                                                                                                                                                                                                                                                                                                                                                                                                                                                                                                                                                                                                                                                                                                                                                                                                                                                                                                                                                                                                                                                                                                                                                                                                                                                                                                                                                                                                                                                                                                                                                                                                                                                                                                                                                                                                                                                                                                                                                                                                                                                                                                                                                                                                                                                                                                                                                                                                                                                                                                                                                                                                                                                                                                             | Lifebrain Covid Labor GmbH                                                                                | Lifebrain Covid Labor GmbH                                                                                                                                                                                         | Alexandra Wagner; Anna Edermayer; Filip Sima                                                                                                                                                                                                                                      |
| EPI_ISL_8820623, EPI_ISL_8820710, EPI_ISL_8847973, EPI_ISL_8848655, EPI_ISL_8852172, EPI_ISL_8854062, EPI_ISL_8857991, EPI_ISL_8896039, EPI_ISL_8898839, EPI_ISL_8898859, EPI_ISL_8899973, EPI_ISL_8900074, EPI_ISL_8900105, EPI_ISL_8900169, EPI_ISL_8900185, EPI_ISL_8930758, EPI_ISL_8930767, EPI_ISL_8930807, EPI_ISL_8932205, EPI_ISL_8933465, EPI_ISL_8933657, EPI_ISL_8941634, EPI_ISL_8944874, EPI_ISL_8944949, EPI_ISL_8945144, EPI_ISL_8945725, EPI_ISL_8961350, EPI_ISL_8962856, EPI_ISL_8965421, EPI_ISL_8965488, EPI_ISL_8965972, EPI_ISL_8966620, EPI_ISL_8967016, EPI_ISL_8969260, EPI_ISL_8969302, EPI_ISL_8969663, EPI_ISL_8995426, EPI_ISL_8995574, EPI_ISL_8999039, EPI_ISL_8999153, EPI_ISL_8999730, EPI_ISL_8999805, EPI_ISL_9002235, EPI_ISL_9002266, EPI_ISL_9026793, EPI_ISL_9070788, EPI_ISL_9083563, EPI_ISL_9135068, EPI_ISL_9178034                                                                                                                                                                                                                                                                                                                                                                                                                                                                                                                                                                                                                                                                                                                                                                                                                                                                                                                                                                                                                                                                                                                                                                                                                                                                                                                                                                                                                                                                                                                                                                                                                                                                                                                                                                                                                                                                                                                                                                                                                                                                                                                                                                                                                                                                                                                                                                                                                                                                                                                                                                                                                                                                                                                                                                                                                                                                                                                                                                                                                                                                                                                                                                                                                                                                                                                                                                                                                                                                                                                                                                                                             | see above                                                                                                 | see above                                                                                                                                                                                                          |                                                                                                                                                                                                                                                                                   |
| EPI_ISL_8817415, EPI_ISL_8822905, EPI_ISL_8851750, EPI_ISL_8851850, EPI_ISL_8851941, EPI_ISL_8852000, EPI_ISL_8854475, EPI_ISL_8854737, EPI_ISL_8854820, EPI_ISL_8896295, EPI_ISL_8898396, EPI_ISL_8899208, EPI_ISL_8899281, EPI_ISL_8899287, EPI_ISL_8899441, EPI_ISL_8899475, EPI_ISL_8899650, EPI_ISL_8899829, EPI_ISL_8899843, EPI_ISL_8899992, EPI_ISL_8940973, EPI_ISL_8941008, EPI_ISL_8941160, EPI_ISL_8943550, EPI_ISL_8964895, EPI_ISL_8966396, EPI_ISL_8967224, EPI_ISL_8967599, EPI_ISL_8967759, EPI_ISL_8968077, EPI_ISL_8968534, EPI_ISL_8968682, EPI_ISL_8968685, EPI_ISL_8970921, EPI_ISL_8970926, EPI_ISL_8970969, EPI_ISL_9000489, EPI_ISL_9000499, EPI_ISL_9002341, EPI_ISL_9002346, EPI_ISL_90071326, EPI_ISL_90071334, EPI_ISL_90079296, EPI_ISL_90079310, EPI_ISL_90079355, EPI_ISL_90079384, EPI_ISL_90080475, EPI_ISL_90082217, EPI_ISL_90083016, EPI_ISL_90083367, EPI_ISL_9134629                                                                                                                                                                                                                                                                                                                                                                                                                                                                                                                                                                                                                                                                                                                                                                                                                                                                                                                                                                                                                                                                                                                                                                                                                                                                                                                                                                                                                                                                                                                                                                                                                                                                                                                                                                                                                                                                                                                                                                                                                                                                                                                                                                                                                                                                                                                                                                                                                                                                                                                                                                                                                                                                                                                                                                                                                                                                                                                                                                                                                                                                                                                                                                                                                                                                                                                                                                                                                                                                                                                                                                 | see above                                                                                                 | see above                                                                                                                                                                                                          |                                                                                                                                                                                                                                                                                   |
| EPI_ISL_8772558, EPI_ISL_8775736, EPI_ISL_8779047, EPI_ISL_8816542, EPI_ISL_8817137, EPI_ISL_8817175, EPI_ISL_8817372, EPI_ISL_8818032, EPI_ISL_8818054, EPI_ISL_8818076, EPI_ISL_8818078, EPI_ISL_8818093, EPI_ISL_8818600, EPI_ISL_8818614, EPI_ISL_8818949, EPI_ISL_8819179, EPI_ISL_8819788, EPI_ISL_8820040, EPI_ISL_8822803, EPI_ISL_8822853, EPI_ISL_8822942, EPI_ISL_8822976, EPI_ISL_8822984, EPI_ISL_8823046, EPI_ISL_8823073, EPI_ISL_8847380, EPI_ISL_8847527, EPI_ISL_8847542, EPI_ISL_8847597, EPI_ISL_8847602, EPI_ISL_8847607, EPI_ISL_8848129, EPI_ISL_8848278, EPI_ISL_8848371, EPI_ISL_8851497, EPI_ISL_8851516, EPI_ISL_8851624, EPI_ISL_8851745, EPI_ISL_8851814, EPI_ISL_8851838, EPI_ISL_8852590, EPI_ISL_8852667, EPI_ISL_8852750, EPI_ISL_8852779, EPI_ISL_8857612, EPI_ISL_8857967, EPI_ISL_8858088, EPI_ISL_8858190, EPI_ISL_8858803, EPI_ISL_8858877, EPI_ISL_8858903, EPI_ISL_8858981, EPI_ISL_8858993, EPI_ISL_8859041, EPI_ISL_8859141, EPI_ISL_8859156, EPI_ISL_8862078, EPI_ISL_8862081, EPI_ISL_8862229, EPI_ISL_8862267, EPI_ISL_8862299, EPI_ISL_8862423, EPI_ISL_8863088, EPI_ISL_8863239, EPI_ISL_8863339, EPI_ISL_8863366, EPI_ISL_8863444, EPI_ISL_8863810, EPI_ISL_8892724, EPI_ISL_8892867, EPI_ISL_8892929, EPI_ISL_8893225, EPI_ISL_8893365, EPI_ISL_8895196, EPI_ISL_8895255, EPI_ISL_8895836, EPI_ISL_8898821, EPI_ISL_8898829, EPI_ISL_8899065, EPI_ISL_8899090, EPI_ISL_8899141, EPI_ISL_8899229, EPI_ISL_8899270, EPI_ISL_8899374, EPI_ISL_8899346, EPI_ISL_8899349, EPI_ISL_8931462, EPI_ISL_8932820, EPI_ISL_8933375, EPI_ISL_8933417, EPI_ISL_8933459, EPI_ISL_8933765, EPI_ISL_8933935, EPI_ISL_8934064, EPI_ISL_8934378, EPI_ISL_8935366, EPI_ISL_8938821, EPI_ISL_8940131, EPI_ISL_8940156, EPI_ISL_8940480, EPI_ISL_8940543, EPI_ISL_8940558, EPI_ISL_8940560, EPI_ISL_8940567, EPI_ISL_8940584, EPI_ISL_8940585, EPI_ISL_8940589, EPI_ISL_8940590, EPI_ISL_8940606, EPI_ISL_8940611, EPI_ISL_8940638, EPI_ISL_8940641, EPI_ISL_8940643, EPI_ISL_8940673, EPI_ISL_8940676, EPI_ISL_8940684, EPI_ISL_8940691, EPI_ISL_8940703, EPI_ISL_8940706, EPI_ISL_8940722, EPI_ISL_8940742, EPI_ISL_8940749, EPI_ISL_8940775, EPI_ISL_8940784, EPI_ISL_8940784, EPI_ISL_8940799, EPI_ISL_8940803, EPI_ISL_8940806, EPI_ISL_8940812, EPI_ISL_8940816, EPI_ISL_8940833, EPI_ISL_8940836, EPI_ISL_8940859, EPI_ISL_8940864, EPI_ISL_8940871, EPI_ISL_8942200, EPI_ISL_8942206, EPI_ISL_8944420, EPI_ISL_8944423, EPI_ISL_8944486, EPI_ISL_8944581, EPI_ISL_8944625, EPI_ISL_8944637, EPI_ISL_8944645, EPI_ISL_8944685, EPI_ISL_8945379, EPI_ISL_8945564, EPI_ISL_8945964, EPI_ISL_8962263, EPI_ISL_8963532, EPI_ISL_8964228, EPI_ISL_8964275, EPI_ISL_8964668, EPI_ISL_8964637, EPI_ISL_8964721, EPI_ISL_8964764, EPI_ISL_8964792, EPI_ISL_8965795, EPI_ISL_8965816, EPI_ISL_8965844, EPI_ISL_8965856, EPI_ISL_8965888, EPI_ISL_8966000, EPI_ISL_8966093, EPI_ISL_8966191, EPI_ISL_8966647, EPI_ISL_8966673, EPI_ISL_8966717, EPI_ISL_8966730, EPI_ISL_8966775, EPI_ISL_8966835, EPI_ISL_8966840, EPI_ISL_8966882, EPI_ISL_8966883, EPI_ISL_8966794, EPI_ISL_8966805, EPI_ISL_8966890, EPI_ISL_8966914, EPI_ISL_8966944, EPI_ISL_8966968, EPI_ISL_8966971, EPI_ISL_8967181, EPI_ISL_8967228, EPI_ISL_8967288, EPI_ISL_8967296, EPI_ISL_8967298, EPI_ISL_8967308, EPI_ISL_8967310, EPI_ISL_8967342, EPI_ISL_8969340, EPI_ISL_8969362, EPI_ISL_8969478, EPI_ISL_8969509, EPI_ISL_8969549, EPI_ISL_8969580, EPI_ISL_8969589, EPI_ISL_8970545, EPI_ISL_8970547, EPI_ISL_8970729, EPI_ISL_8971265, EPI_ISL_8971375, EPI_ISL_8971379, EPI_ISL_8971380, EPI_ISL_8971395, EPI_ISL_8971735, EPI_ISL_8971742, EPI_ISL_8971755, EPI_ISL_8971799, EPI_ISL_8971834, EPI_ISL_8971915, EPI_ISL_8971985, EPI_ISL_8972010, EPI_ISL_8972333, EPI_ISL_8972337, EPI_ISL_8972345, EPI_ISL_8973129, EPI_ISL_8973626, EPI_ISL_8973656, EPI_ISL_8973798, EPI_ISL_8974025, EPI_ISL_8974094, EPI_ISL_8974102, EPI_ISL_8995188, EPI_ISL_8995290, EPI_ISL_8995293, EPI_ISL_8996682, EPI_ISL_8996759, EPI_ISL_8996811, EPI_ISL_8996870, EPI_ISL_9001483, EPI_ISL_9001695, EPI_ISL_9001986, EPI_ISL_9002059, EPI_ISL_9019088, EPI_ISL_9019926, EPI_ISL_9025549, EPI_ISL_9026919, EPI_ISL_9026964, EPI_ISL_9026985, EPI_ISL_9027015, EPI_ISL_9027040, EPI_ISL_9027132, EPI_ISL_9027200, EPI_ISL_9066718, EPI_ISL_9066793, EPI_ISL_9078713, EPI_ISL_9078775, EPI_ISL_9080337, EPI_ISL_9131585, EPI_ISL_9131726, EPI_ISL_9134262, EPI_ISL_9134286, EPI_ISL_9134678 | see above                                                                                                 | see above                                                                                                                                                                                                          | see above                                                                                                                                                                                                                                                                         |
| EPI_ISL_8860159, EPI_ISL_8934918, EPI_ISL_8935148, EPI_ISL_8935189, EPI_ISL_8940194, EPI_ISL_8940197, EPI_ISL_8940278, EPI_ISL_8940373, EPI_ISL_8973673, EPI_ISL_8973701                                                                                                                                                                                                                                                                                                                                                                                                                                                                                                                                                                                                                                                                                                                                                                                                                                                                                                                                                                                                                                                                                                                                                                                                                                                                                                                                                                                                                                                                                                                                                                                                                                                                                                                                                                                                                                                                                                                                                                                                                                                                                                                                                                                                                                                                                                                                                                                                                                                                                                                                                                                                                                                                                                                                                                                                                                                                                                                                                                                                                                                                                                                                                                                                                                                                                                                                                                                                                                                                                                                                                                                                                                                                                                                                                                                                                                                                                                                                                                                                                                                                                                                                                                                                                                                                                                    | see above                                                                                                 | see above                                                                                                                                                                                                          | see above                                                                                                                                                                                                                                                                         |

| Genomics UK (COG-UK) Consortium                                                                                                                                                                                                                                                                                                                                                                                                                                                                                                                                                                                                    |                                                                                                            |                                                                                                                                                                                           | Goncalves                                                                                                                                                                                                                                                                                                                                                                                                                                                                                                                                                                                                                                                                                                 |
|------------------------------------------------------------------------------------------------------------------------------------------------------------------------------------------------------------------------------------------------------------------------------------------------------------------------------------------------------------------------------------------------------------------------------------------------------------------------------------------------------------------------------------------------------------------------------------------------------------------------------------|------------------------------------------------------------------------------------------------------------|-------------------------------------------------------------------------------------------------------------------------------------------------------------------------------------------|-----------------------------------------------------------------------------------------------------------------------------------------------------------------------------------------------------------------------------------------------------------------------------------------------------------------------------------------------------------------------------------------------------------------------------------------------------------------------------------------------------------------------------------------------------------------------------------------------------------------------------------------------------------------------------------------------------------|
| EPI_ISL_9459201                                                                                                                                                                                                                                                                                                                                                                                                                                                                                                                                                                                                                    | Limbach - Ganzimmun Diagnostics AG Mainz                                                                   | Robert Koch Institute                                                                                                                                                                     |                                                                                                                                                                                                                                                                                                                                                                                                                                                                                                                                                                                                                                                                                                           |
| EPI_ISL_9218557,<br>EPI_ISL_9218583,<br>EPI_ISL_9218617,<br>EPI_ISL_9218634                                                                                                                                                                                                                                                                                                                                                                                                                                                                                                                                                        | Limbach - MVZ Humangenetik Ulm                                                                             | Robert Koch Institute                                                                                                                                                                     |                                                                                                                                                                                                                                                                                                                                                                                                                                                                                                                                                                                                                                                                                                           |
| EPI_ISL_9217098,<br>EPI_ISL_9448467,<br>EPI_ISL_9448713                                                                                                                                                                                                                                                                                                                                                                                                                                                                                                                                                                            | Limbach - MVZ Labor Cottbus                                                                                | Robert Koch Institute                                                                                                                                                                     |                                                                                                                                                                                                                                                                                                                                                                                                                                                                                                                                                                                                                                                                                                           |
| EPI_ISL_9216728, EPI_ISL_9216738, EPI_ISL_9216756, EPI_ISL_9216819, EPI_ISL_9216845, EPI_ISL_9216848, EPI_ISL_9216861, EPI_ISL_9216896, EPI_ISL_9216901, EPI_ISL_9217082, EPI_ISL_9217101, EPI_ISL_9217102, EPI_ISL_9217109, EPI_ISL_9217196, EPI_ISL_9217199, EPI_ISL_9217315, EPI_ISL_9217364, EPI_ISL_9217375, EPI_ISL_9217407, EPI_ISL_9217423, EPI_ISL_9448268, EPI_ISL_9448282, EPI_ISL_9448541, EPI_ISL_9448614, EPI_ISL_9448948, EPI_ISL_9449320, EPI_ISL_9449409, EPI_ISL_9449647, EPI_ISL_9449745, EPI_ISL_9449837, EPI_ISL_9449944, EPI_ISL_9450018, EPI_ISL_9450026, EPI_ISL_9450074                                   |                                                                                                            |                                                                                                                                                                                           |                                                                                                                                                                                                                                                                                                                                                                                                                                                                                                                                                                                                                                                                                                           |
| see above                                                                                                                                                                                                                                                                                                                                                                                                                                                                                                                                                                                                                          | Limbach - MVZ Labor Dr. Volkmann & Kollegen                                                                | Robert Koch Institute                                                                                                                                                                     |                                                                                                                                                                                                                                                                                                                                                                                                                                                                                                                                                                                                                                                                                                           |
| EPI_ISL_9448692,<br>EPI_ISL_9449114,<br>EPI_ISL_9449847                                                                                                                                                                                                                                                                                                                                                                                                                                                                                                                                                                            | Limbach - MVZ Labor Limbach Dresden GbR                                                                    | Robert Koch Institute                                                                                                                                                                     |                                                                                                                                                                                                                                                                                                                                                                                                                                                                                                                                                                                                                                                                                                           |
| EPI_ISL_9208237                                                                                                                                                                                                                                                                                                                                                                                                                                                                                                                                                                                                                    | Limbach - MVZ Labor Nürnberg                                                                               | Robert Koch Institute                                                                                                                                                                     |                                                                                                                                                                                                                                                                                                                                                                                                                                                                                                                                                                                                                                                                                                           |
| EPI_ISL_9461156, EPI_ISL_9461162, EPI_ISL_9461164, EPI_ISL_9461166, EPI_ISL_9461217, EPI_ISL_9461233, EPI_ISL_9461253, EPI_ISL_9461264, EPI_ISL_9461286, EPI_ISL_9461290, EPI_ISL_9461313, EPI_ISL_9461380, EPI_ISL_9461386                                                                                                                                                                                                                                                                                                                                                                                                        | Limbach - MVZ Labor Ravensburg Labor Dr. Gärtner                                                           | Robert Koch Institute                                                                                                                                                                     |                                                                                                                                                                                                                                                                                                                                                                                                                                                                                                                                                                                                                                                                                                           |
| see above                                                                                                                                                                                                                                                                                                                                                                                                                                                                                                                                                                                                                          | Limbach - MVZ Labor Ravensburg Labor Dr. Gärtner                                                           | Robert Koch Institute                                                                                                                                                                     |                                                                                                                                                                                                                                                                                                                                                                                                                                                                                                                                                                                                                                                                                                           |
| EPI_ISL_9449606                                                                                                                                                                                                                                                                                                                                                                                                                                                                                                                                                                                                                    | Limbach - MVZ Labor Westmecklenburg Schmutdlach-Oswald-Kettermann & Kollegen                               | Robert Koch Institute                                                                                                                                                                     |                                                                                                                                                                                                                                                                                                                                                                                                                                                                                                                                                                                                                                                                                                           |
| EPI_ISL_9695067,<br>EPI_ISL_9695070,<br>EPI_ISL_9695071                                                                                                                                                                                                                                                                                                                                                                                                                                                                                                                                                                            | Länsi-Pohjan keskussairaala                                                                                | Expert Microbiology, National Institute for Health and Welfare                                                                                                                            | Carita Savolainen-Kopra; Erika Lindh; Haider al-Hello; Jani Halkilahti; Kirsi Liitsola; Niina Ikonen; Olli Vapalahti; Pekka Ellonen; Phuoc Truong; Päivi Laurila; Ravi Kant; Sari Hannula; Soile Blomqvist; Teemu Smura                                                                                                                                                                                                                                                                                                                                                                                                                                                                                   |
| EPI_ISL_8885514,<br>EPI_ISL_9420970,<br>EPI_ISL_9403046,<br>EPI_ISL_9604314                                                                                                                                                                                                                                                                                                                                                                                                                                                                                                                                                        | M.P.Shah Government Medical College, Jamnagar                                                              | Gujarat Biotechnology Research Centre                                                                                                                                                     | Akhilesh Modi; Apurvasinh Puvar; Bhadreshsinh Gohil; Binita; Chaitanya Joshi; Disha Vora; Janvi Raval; Jaykumar Rangani; Madhvi Joshi; Nimesh Patel; Nitin Savaliya; Nitin Shukla; Nitin Shukla; Priyank Chavda; Ramesh Pandit; Roshani Mishra; Sonal Sharma; Tasnim Trivedi; Zarna Patel                                                                                                                                                                                                                                                                                                                                                                                                                 |
| EPI_ISL_9374559,<br>EPI_ISL_9374560,<br>EPI_ISL_9374562                                                                                                                                                                                                                                                                                                                                                                                                                                                                                                                                                                            | MAX HOSPITAL                                                                                               | ILBS                                                                                                                                                                                      | Amit Pandey; Arjun Bhugra; Chhagan Bihari Sharma; Ekta Gupta; Pramod Gautam; Priya Singh; Reshu Agarwal; Shiv Kumar Sarin; Urvinder Kaur; Varun Suroliya                                                                                                                                                                                                                                                                                                                                                                                                                                                                                                                                                  |
| EPI_ISL_9110111,<br>EPI_ISL_9211423,<br>EPI_ISL_9221391,<br>EPI_ISL_9224055,<br>EPI_ISL_9458589,<br>EPI_ISL_9458592                                                                                                                                                                                                                                                                                                                                                                                                                                                                                                                | MDI Limbach Berlin GmbH; MVZ Labor Berlin                                                                  | Robert Koch Institute                                                                                                                                                                     |                                                                                                                                                                                                                                                                                                                                                                                                                                                                                                                                                                                                                                                                                                           |
| EPI_ISL_9212082, EPI_ISL_9212085, EPI_ISL_9212151, EPI_ISL_9212180, EPI_ISL_9212216, EPI_ISL_9218925, EPI_ISL_9218984, EPI_ISL_9223051                                                                                                                                                                                                                                                                                                                                                                                                                                                                                             |                                                                                                            |                                                                                                                                                                                           |                                                                                                                                                                                                                                                                                                                                                                                                                                                                                                                                                                                                                                                                                                           |
| see above                                                                                                                                                                                                                                                                                                                                                                                                                                                                                                                                                                                                                          | MVZ Dr. Eberhard & Partner Dortmund                                                                        | Robert Koch Institute                                                                                                                                                                     |                                                                                                                                                                                                                                                                                                                                                                                                                                                                                                                                                                                                                                                                                                           |
| EPI_ISL_9222028,<br>EPI_ISL_9222032,<br>EPI_ISL_9222037,<br>EPI_ISL_9222085,<br>EPI_ISL_9222110,<br>EPI_ISL_9222251                                                                                                                                                                                                                                                                                                                                                                                                                                                                                                                | MVZ Labor Dr. Fenner und Kollegen (Standort Hamburg)                                                       | Robert Koch Institute                                                                                                                                                                     |                                                                                                                                                                                                                                                                                                                                                                                                                                                                                                                                                                                                                                                                                                           |
| EPI_ISL_9108599, EPI_ISL_9110416, EPI_ISL_9110419, EPI_ISL_9221422, EPI_ISL_9223212, EPI_ISL_9227931, EPI_ISL_9228448, EPI_ISL_9228449, EPI_ISL_9228465, EPI_ISL_9228654, EPI_ISL_9229566, EPI_ISL_9230255, EPI_ISL_9444634, EPI_ISL_9445215                                                                                                                                                                                                                                                                                                                                                                                       |                                                                                                            |                                                                                                                                                                                           |                                                                                                                                                                                                                                                                                                                                                                                                                                                                                                                                                                                                                                                                                                           |
| see above                                                                                                                                                                                                                                                                                                                                                                                                                                                                                                                                                                                                                          | MVZ Labor Dr. Limbach & Kollegen GbR                                                                       | Robert Koch Institute                                                                                                                                                                     |                                                                                                                                                                                                                                                                                                                                                                                                                                                                                                                                                                                                                                                                                                           |
| EPI_ISL_9217306                                                                                                                                                                                                                                                                                                                                                                                                                                                                                                                                                                                                                    | MVZ Labor Dr. Reising-Ackermann und Kollegen                                                               | Robert Koch Institute                                                                                                                                                                     |                                                                                                                                                                                                                                                                                                                                                                                                                                                                                                                                                                                                                                                                                                           |
| EPI_ISL_9212529,<br>EPI_ISL_9212539,<br>EPI_ISL_9228029,<br>EPI_ISL_9228031,<br>EPI_ISL_9228115,<br>EPI_ISL_9228244                                                                                                                                                                                                                                                                                                                                                                                                                                                                                                                | MVZ Labor Krone GbR                                                                                        | Robert Koch Institute                                                                                                                                                                     |                                                                                                                                                                                                                                                                                                                                                                                                                                                                                                                                                                                                                                                                                                           |
| EPI_ISL_9221270,<br>EPI_ISL_9221389,<br>EPI_ISL_9230260                                                                                                                                                                                                                                                                                                                                                                                                                                                                                                                                                                            | MVZ Medizinisches Labor Hannover GmbH                                                                      | Robert Koch Institute                                                                                                                                                                     |                                                                                                                                                                                                                                                                                                                                                                                                                                                                                                                                                                                                                                                                                                           |
| EPI_ISL_9110494, EPI_ISL_9210018, EPI_ISL_9210031, EPI_ISL_9210035, EPI_ISL_9210058, EPI_ISL_9210063, EPI_ISL_9210073, EPI_ISL_9210077, EPI_ISL_9210078, EPI_ISL_9210082, EPI_ISL_9216328, EPI_ISL_9216330, EPI_ISL_9216338, EPI_ISL_9216351, EPI_ISL_9223424, EPI_ISL_9223425, EPI_ISL_9223426, EPI_ISL_9223428, EPI_ISL_9223429, EPI_ISL_9223593, EPI_ISL_9223600, EPI_ISL_9223603, EPI_ISL_9223607, EPI_ISL_9223611, EPI_ISL_9223618, EPI_ISL_9223620, EPI_ISL_9223628, EPI_ISL_9223639, EPI_ISL_9223640, EPI_ISL_9223645, EPI_ISL_9223651, EPI_ISL_9223665, EPI_ISL_9223666, EPI_ISL_9223667, EPI_ISL_9223669, EPI_ISL_9223671 |                                                                                                            |                                                                                                                                                                                           |                                                                                                                                                                                                                                                                                                                                                                                                                                                                                                                                                                                                                                                                                                           |
| see above                                                                                                                                                                                                                                                                                                                                                                                                                                                                                                                                                                                                                          | MVZ für Laboratoriumsmedizin und Mikrobiologie Koblenz-Mittelrhein (Labor Koblenz)                         | Robert Koch Institute                                                                                                                                                                     |                                                                                                                                                                                                                                                                                                                                                                                                                                                                                                                                                                                                                                                                                                           |
| EPI_ISL_9211841,<br>EPI_ISL_9212053,<br>EPI_ISL_9212093,<br>EPI_ISL_9218960                                                                                                                                                                                                                                                                                                                                                                                                                                                                                                                                                        | MVZ für Laboratoriumsmedizin und Mikrobiologie Würzburg                                                    | Robert Koch Institute                                                                                                                                                                     |                                                                                                                                                                                                                                                                                                                                                                                                                                                                                                                                                                                                                                                                                                           |
| EPI_ISL_9799547                                                                                                                                                                                                                                                                                                                                                                                                                                                                                                                                                                                                                    | Maryland Genomics, Institute for Genome Sciences, University of Maryland School of Medicine                | Maryland Genomics, Institute for Genome Sciences, University of Maryland School of Medicine                                                                                               | Claire M; Fraser; George; Hazen; Holly; Humphrys; Jacques; Jain; Kevin; Kranthi; Lisa D; Luke J; Mike; Ott; Ravel; Regan; Roussey; Sadzewicz; Sandra; Tallon; Tracy; Vavikolanu                                                                                                                                                                                                                                                                                                                                                                                                                                                                                                                           |
| EPI_ISL_9342638                                                                                                                                                                                                                                                                                                                                                                                                                                                                                                                                                                                                                    | Maun Reference Hospital laboratory                                                                         | Botswana Harvard HIV Reference Laboratory                                                                                                                                                 | Boitumelo J.L Zuze; Botshelo Radibe; Dorcas Maruapula; Joseph Makhema; Kgomoiso Moruisi; Legodile Kooepile; Mosepele Mosepele; Mphaphi B. Mbulawa; Ontlametse T. Bareng; Pamela Smith-Lawrence; Roger Shapiro; Sandra Maripe; Shahin Lockman; Sikhulle Moyo; Simani Gasetsiwe; Thongbotho Mphoyakgosi; Timothy Odirile Matsukwane; Wonderful T. Choga                                                                                                                                                                                                                                                                                                                                                     |
| EPI_ISL_9480435, EPI_ISL_9480443, EPI_ISL_9626218, EPI_ISL_9626231, EPI_ISL_9626262, EPI_ISL_9626312, EPI_ISL_9649912, EPI_ISL_9650069                                                                                                                                                                                                                                                                                                                                                                                                                                                                                             |                                                                                                            |                                                                                                                                                                                           |                                                                                                                                                                                                                                                                                                                                                                                                                                                                                                                                                                                                                                                                                                           |
| see above                                                                                                                                                                                                                                                                                                                                                                                                                                                                                                                                                                                                                          | Medical Microbiology Unit, Department for Laboratory Medicine, Drammen Hospital, Vestre Viken Health Trust | Norwegian Institute of Public Health, Department of Virology                                                                                                                              | Atiya R Ali; Debech Nadia; Engebretsen Serina Beate; Garcia Llorente Ignacio; Hilde Elshaug; Hilde Nordby Falkenhaug; Hilde Vollan; Jon Bråte; Kamilla Heddeland Inestjord; Karoline Bragstad; Kathrine Stene-Johansen; Line Victoria Moen; Marie Paulsen Madsen; Olav Hungnes; Pedersen Benedikte Nevjen; Rasmus Riis Kopperud                                                                                                                                                                                                                                                                                                                                                                           |
| EPI_ISL_9209876                                                                                                                                                                                                                                                                                                                                                                                                                                                                                                                                                                                                                    | Medizinische Laboratorien Düsseldorf                                                                       | Robert Koch Institute                                                                                                                                                                     |                                                                                                                                                                                                                                                                                                                                                                                                                                                                                                                                                                                                                                                                                                           |
| EPI_ISL_9216903                                                                                                                                                                                                                                                                                                                                                                                                                                                                                                                                                                                                                    | Medizinisches Labor Ostachsen MVZ GbR Nebenbetriebsstätte Dresden                                          | Robert Koch Institute                                                                                                                                                                     |                                                                                                                                                                                                                                                                                                                                                                                                                                                                                                                                                                                                                                                                                                           |
| EPI_ISL_9211819, EPI_ISL_9211835, EPI_ISL_9211845, EPI_ISL_9211885, EPI_ISL_9211888, EPI_ISL_9211924, EPI_ISL_9211943, EPI_ISL_9212089, EPI_ISL_9212101                                                                                                                                                                                                                                                                                                                                                                                                                                                                            |                                                                                                            |                                                                                                                                                                                           |                                                                                                                                                                                                                                                                                                                                                                                                                                                                                                                                                                                                                                                                                                           |
| see above                                                                                                                                                                                                                                                                                                                                                                                                                                                                                                                                                                                                                          | Medizinisches Labor Wahl Lüdenscheid                                                                       | Robert Koch Institute                                                                                                                                                                     |                                                                                                                                                                                                                                                                                                                                                                                                                                                                                                                                                                                                                                                                                                           |
| EPI_ISL_9154325                                                                                                                                                                                                                                                                                                                                                                                                                                                                                                                                                                                                                    | Medyczne Laboratorium Diagnostyczne Medrex                                                                 | 1. Academic Center for Pathomorphological and Genetic-Molecular Diagnostics Ltd, Bialystok, Poland 2. National Institute of Public Health - National Institute of Hygiene, Warsaw, Poland | Anetta Sulewska; Jacek Nikliński; Janusz Dzieciół; Joanna Kiśluk; Katarzyna Zacharczuk; Konrad Raczkowski; Magdalena Nowakowska; Małgorzata Sadkowska-Todys; Piotr Karabowicz; Piotr Majewski; Przemysław Bieчек. Joanna Reszeć; Radosław Charkiewicz; Tomasz Wołkowicz                                                                                                                                                                                                                                                                                                                                                                                                                                   |
| EPI_ISL_8955276,<br>EPI_ISL_8955531,<br>EPI_ISL_8955536,<br>EPI_ISL_9302406,<br>EPI_ISL_9302931                                                                                                                                                                                                                                                                                                                                                                                                                                                                                                                                    | Microbiological Diagnostic Unit - Public Health Laboratory (MDU-PHL)                                       | Microbiological Diagnostic Unit - Public Health Laboratory (MDU-PHL)                                                                                                                      | Horan, K.; N.L.; Seemann, T.; Sherry                                                                                                                                                                                                                                                                                                                                                                                                                                                                                                                                                                                                                                                                      |
| EPI_ISL_9139390,<br>EPI_ISL_9458114,<br>EPI_ISL_9458132                                                                                                                                                                                                                                                                                                                                                                                                                                                                                                                                                                            | Microvida                                                                                                  | Microvida                                                                                                                                                                                 | Jaco J. Verweij; Joep J. J. M. Stohr; Suzan D. Pas                                                                                                                                                                                                                                                                                                                                                                                                                                                                                                                                                                                                                                                        |
| EPI_ISL_8825471,<br>EPI_ISL_8826376,<br>EPI_ISL_9210625,<br>EPI_ISL_9210833                                                                                                                                                                                                                                                                                                                                                                                                                                                                                                                                                        | Middlemore Hospital                                                                                        | Institute of Environmental Science and Research (ESR)                                                                                                                                     | Anja Werno; Antje van der Linden; Arlo Upton; Chris Mansell; Clare Gebbie; David Hammer; Dhanisha Patel; Dragana Drinkovic; Erasmus Smit; Gary McAuliffe; Hana Sofia Andersson; Hermes Perez; James Ussher; Jill Sherwood; Jing Wang; Joep de Lig; Josh Freeman; Julia Howard; Juliet Elvy; Lauren Jelly; Mary DeAlmeida; Matt Blakiston; Matt Storey; Matthew Rogers; Max Bloomfield; Michael Addidle; Michelle Baim; Muhammad Faisal; Nikki Freed; Olin Silander; Olivia Stroeven; Rachel Boyle; Sally Roberts; SallyAnn Harbison; Sarah Cockerton; Sarah Jefferies; Sharmini Muttaiyah; Susan Morphett; Susan Taylor; Timothy Blackmore; Vani Sathyendran; Veronica Playle; Virginia Hope; Xiaoyun Ren |

|                                                                                                                                                                                                                                                                                                                                                                                                                                                                                                                                                                                                                                                                                                                                                                                                                                                                                                                                                                                                                                                                                                                                                                                                                                                                                                                                                                                                                                                                                                                                                                                                                                                                                                                                                                                                                                                                                                                                                                                                                                                                                                                                                                                                                                                                                                                                                                                                                                                                                                                                                                                                                                                                                                                                                                                                                                                                                                                                                                                                                                                                                                                                                                                                     |                                                                                                                       |                                                                                                                                                                                                                                                                                    |                                                                                                                                                                                                                                                                                                                                                                                                                                                                                                                                                        |
|-----------------------------------------------------------------------------------------------------------------------------------------------------------------------------------------------------------------------------------------------------------------------------------------------------------------------------------------------------------------------------------------------------------------------------------------------------------------------------------------------------------------------------------------------------------------------------------------------------------------------------------------------------------------------------------------------------------------------------------------------------------------------------------------------------------------------------------------------------------------------------------------------------------------------------------------------------------------------------------------------------------------------------------------------------------------------------------------------------------------------------------------------------------------------------------------------------------------------------------------------------------------------------------------------------------------------------------------------------------------------------------------------------------------------------------------------------------------------------------------------------------------------------------------------------------------------------------------------------------------------------------------------------------------------------------------------------------------------------------------------------------------------------------------------------------------------------------------------------------------------------------------------------------------------------------------------------------------------------------------------------------------------------------------------------------------------------------------------------------------------------------------------------------------------------------------------------------------------------------------------------------------------------------------------------------------------------------------------------------------------------------------------------------------------------------------------------------------------------------------------------------------------------------------------------------------------------------------------------------------------------------------------------------------------------------------------------------------------------------------------------------------------------------------------------------------------------------------------------------------------------------------------------------------------------------------------------------------------------------------------------------------------------------------------------------------------------------------------------------------------------------------------------------------------------------------------------|-----------------------------------------------------------------------------------------------------------------------|------------------------------------------------------------------------------------------------------------------------------------------------------------------------------------------------------------------------------------------------------------------------------------|--------------------------------------------------------------------------------------------------------------------------------------------------------------------------------------------------------------------------------------------------------------------------------------------------------------------------------------------------------------------------------------------------------------------------------------------------------------------------------------------------------------------------------------------------------|
| EPI_ISL_9203607                                                                                                                                                                                                                                                                                                                                                                                                                                                                                                                                                                                                                                                                                                                                                                                                                                                                                                                                                                                                                                                                                                                                                                                                                                                                                                                                                                                                                                                                                                                                                                                                                                                                                                                                                                                                                                                                                                                                                                                                                                                                                                                                                                                                                                                                                                                                                                                                                                                                                                                                                                                                                                                                                                                                                                                                                                                                                                                                                                                                                                                                                                                                                                                     | Minnesota Department of Health, Public Health Laboratory                                                              | Minnesota Department of Health, Public Health Laboratory                                                                                                                                                                                                                           | Alyssa Mondelli; Elizabeth Horn; Haejin Hwang; Jacob Garfin; Kelly Pung; Matt Plumb; Sarah Namugenyi; and Xiong Wang                                                                                                                                                                                                                                                                                                                                                                                                                                   |
| EPI_ISL_9488139                                                                                                                                                                                                                                                                                                                                                                                                                                                                                                                                                                                                                                                                                                                                                                                                                                                                                                                                                                                                                                                                                                                                                                                                                                                                                                                                                                                                                                                                                                                                                                                                                                                                                                                                                                                                                                                                                                                                                                                                                                                                                                                                                                                                                                                                                                                                                                                                                                                                                                                                                                                                                                                                                                                                                                                                                                                                                                                                                                                                                                                                                                                                                                                     | Missouri State Public Health Laboratory                                                                               | Missouri State Public Health Laboratory                                                                                                                                                                                                                                            | Ashley New; Joshua Barry; Matthew Sinn                                                                                                                                                                                                                                                                                                                                                                                                                                                                                                                 |
| EPI_ISL_9091791                                                                                                                                                                                                                                                                                                                                                                                                                                                                                                                                                                                                                                                                                                                                                                                                                                                                                                                                                                                                                                                                                                                                                                                                                                                                                                                                                                                                                                                                                                                                                                                                                                                                                                                                                                                                                                                                                                                                                                                                                                                                                                                                                                                                                                                                                                                                                                                                                                                                                                                                                                                                                                                                                                                                                                                                                                                                                                                                                                                                                                                                                                                                                                                     | Molecular Biology Laboratory, Vidant Medical Center                                                                   | Brody Integrative Genomics Core, East Carolina University                                                                                                                                                                                                                          | Changhong Yin; Heather Duncan; John T. Fallon; Kimberly P. Briley; Weihoa Huang                                                                                                                                                                                                                                                                                                                                                                                                                                                                        |
| EPI_ISL_9428666                                                                                                                                                                                                                                                                                                                                                                                                                                                                                                                                                                                                                                                                                                                                                                                                                                                                                                                                                                                                                                                                                                                                                                                                                                                                                                                                                                                                                                                                                                                                                                                                                                                                                                                                                                                                                                                                                                                                                                                                                                                                                                                                                                                                                                                                                                                                                                                                                                                                                                                                                                                                                                                                                                                                                                                                                                                                                                                                                                                                                                                                                                                                                                                     | Molecular HIV and EID, BIDI, DDC,Thai MOPH                                                                            | Molecular HIV and EID, BIDI, DDC,Thai MOPH                                                                                                                                                                                                                                         | Kitpong Sunchatawiriul; Sumonnet Uttayamakul; Visal Moolasart; Weerawat Manosuthi                                                                                                                                                                                                                                                                                                                                                                                                                                                                      |
| EPI_ISL_9402972, EPI_ISL_9403042                                                                                                                                                                                                                                                                                                                                                                                                                                                                                                                                                                                                                                                                                                                                                                                                                                                                                                                                                                                                                                                                                                                                                                                                                                                                                                                                                                                                                                                                                                                                                                                                                                                                                                                                                                                                                                                                                                                                                                                                                                                                                                                                                                                                                                                                                                                                                                                                                                                                                                                                                                                                                                                                                                                                                                                                                                                                                                                                                                                                                                                                                                                                                                    | Molecular lab, Shree Krishna Hospital, Karamsad, Anand                                                                | Gujarat Biotechnology Research Centre                                                                                                                                                                                                                                              | Akhilesh Modi; Apurvashin Puvar; Bhadrshsinh Gohil; Chaitanya Joshi; Chirag; Disha Vora; Janvi Raval; Jaykumar Rangani; Madhvi Joshi; Mustafa; Nimesh Patel; Nitin Savaliya; Nitin Shukla; Priyank Chavda; Ramesh Pandit; Roshani Mishra; Sonal Sharma; Tasnim Trivedi; Zarna Patel                                                                                                                                                                                                                                                                    |
| EPI_ISL_8767640, EPI_ISL_8833777, EPI_ISL_8885989, EPI_ISL_8886470, EPI_ISL_8886517, EPI_ISL_8886534, EPI_ISL_8886668, EPI_ISL_8886806, EPI_ISL_8887019, EPI_ISL_8887140, EPI_ISL_8887168, EPI_ISL_8887210, EPI_ISL_8887252, EPI_ISL_8887294, EPI_ISL_8887459, EPI_ISL_8887485, EPI_ISL_8887523, EPI_ISL_8887573, EPI_ISL_8887886, EPI_ISL_9006216, EPI_ISL_9007642, EPI_ISL_9007852, EPI_ISL_9007952, EPI_ISL_9007963, EPI_ISL_9008019, EPI_ISL_9009269, EPI_ISL_9009343, EPI_ISL_9009438, EPI_ISL_9009608, EPI_ISL_9009619, EPI_ISL_9009840, EPI_ISL_9009927, EPI_ISL_9010538, EPI_ISL_9010718, EPI_ISL_9010825, EPI_ISL_9011461, EPI_ISL_9011511, EPI_ISL_9011614, EPI_ISL_9066760, EPI_ISL_9120103, EPI_ISL_9120197, EPI_ISL_9121450, EPI_ISL_9121600, EPI_ISL_9121777, EPI_ISL_9122052, EPI_ISL_9123420, EPI_ISL_9123523, EPI_ISL_9124534, EPI_ISL_9124920, EPI_ISL_9127371, EPI_ISL_9128205, EPI_ISL_9236006, EPI_ISL_9236987, EPI_ISL_9238233, EPI_ISL_9240451, EPI_ISL_9241595, EPI_ISL_9242662, EPI_ISL_9247811, EPI_ISL_9447831, EPI_ISL_9449097, EPI_ISL_9450754, EPI_ISL_9450888, EPI_ISL_9452139, EPI_ISL_9452684, EPI_ISL_9454280                                                                                                                                                                                                                                                                                                                                                                                                                                                                                                                                                                                                                                                                                                                                                                                                                                                                                                                                                                                                                                                                                                                                                                                                                                                                                                                                                                                                                                                                                                                                                                                                                                                                                                                                                                                                                                                                                                                                                                                                                                                     | Gujarat Biotechnology Research Centre                                                                                 | Akhilesh Modi; Apurvashin Puvar; Bhadrshsinh Gohil; Chaitanya Joshi; Disha Vora; Janvi Raval; Jaykumar Rangani; Jaysree Pethani; Madhvi Joshi; Nimesh Patel; Nitin Savaliya; NitinShukla; Priyank Chavda; Ramesh Pandit; Roshani Mishra; Sonal Sharma; Tasnim Trivedi; Zarna Patel |                                                                                                                                                                                                                                                                                                                                                                                                                                                                                                                                                        |
| EPI_ISL_9454324, EPI_ISL_9454555, EPI_ISL_9455237, EPI_ISL_9455505                                                                                                                                                                                                                                                                                                                                                                                                                                                                                                                                                                                                                                                                                                                                                                                                                                                                                                                                                                                                                                                                                                                                                                                                                                                                                                                                                                                                                                                                                                                                                                                                                                                                                                                                                                                                                                                                                                                                                                                                                                                                                                                                                                                                                                                                                                                                                                                                                                                                                                                                                                                                                                                                                                                                                                                                                                                                                                                                                                                                                                                                                                                                  | Molekylaer Medicinsk Afdeling, Aarhus University Hospital, Aarhus, Denmark                                            | Statens Serum Institut Bioinformatics and Microbial Genomics                                                                                                                                                                                                                       | Danish Covid-19 Genome Consortium                                                                                                                                                                                                                                                                                                                                                                                                                                                                                                                      |
| EPI_ISL_9604293, EPI_ISL_9604294                                                                                                                                                                                                                                                                                                                                                                                                                                                                                                                                                                                                                                                                                                                                                                                                                                                                                                                                                                                                                                                                                                                                                                                                                                                                                                                                                                                                                                                                                                                                                                                                                                                                                                                                                                                                                                                                                                                                                                                                                                                                                                                                                                                                                                                                                                                                                                                                                                                                                                                                                                                                                                                                                                                                                                                                                                                                                                                                                                                                                                                                                                                                                                    | NHL Municipal Medical College, Ahmedabad (SVP)                                                                        | Gujarat Biotechnology Research Centre                                                                                                                                                                                                                                              | Akhilesh Modi; Apurvashin Puvar; Bhadrshsinh Gohil; Chaitanya Joshi; Disha Vora; Janvi Raval; Jaykumar Rangani; Jaysree Pethani; Madhvi Joshi; Nimesh Patel; Nitin Savaliya; NitinShukla; Priyank Chavda; Ramesh Pandit; Roshani Mishra; Sonal Sharma; Tasnim Trivedi; Zarna Patel                                                                                                                                                                                                                                                                     |
| EPI_ISL_9662330, EPI_ISL_9662333, EPI_ISL_9662350                                                                                                                                                                                                                                                                                                                                                                                                                                                                                                                                                                                                                                                                                                                                                                                                                                                                                                                                                                                                                                                                                                                                                                                                                                                                                                                                                                                                                                                                                                                                                                                                                                                                                                                                                                                                                                                                                                                                                                                                                                                                                                                                                                                                                                                                                                                                                                                                                                                                                                                                                                                                                                                                                                                                                                                                                                                                                                                                                                                                                                                                                                                                                   | NHLS Universitat Academic                                                                                             | UFS Virology                                                                                                                                                                                                                                                                       | D Goedhals; Emmanuel Ogunbayo; MM Nyaga; MT Mogotsi; P Nthiga; PA Bester; T de Oliveira                                                                                                                                                                                                                                                                                                                                                                                                                                                                |
| EPI_ISL_9202560, EPI_ISL_9202626                                                                                                                                                                                                                                                                                                                                                                                                                                                                                                                                                                                                                                                                                                                                                                                                                                                                                                                                                                                                                                                                                                                                                                                                                                                                                                                                                                                                                                                                                                                                                                                                                                                                                                                                                                                                                                                                                                                                                                                                                                                                                                                                                                                                                                                                                                                                                                                                                                                                                                                                                                                                                                                                                                                                                                                                                                                                                                                                                                                                                                                                                                                                                                    | NZOZ MEDITEST Diagnostyka Medyczna Jacek Podolski                                                                     | 1. Academic Center for Pathomorphological and Genetic-Molecular Diagnostics ltd, Bialystok, Poland 2. National Institute of Public Health - National Institute of Hygiene, Warsaw, Poland                                                                                          | Anetta Sulewska; Jacek Nikliński; Janusz Dzieciol; Joanna Kiśluk; Katarzyna Zacharczuk; Konrad Raczkowski; Magdalena Nowakowska; Malgorzata Sadkowska-Todys; Piotr Karabowicz; Piotr Majewski; Przemyslaw Biecek. Joanna Reszcz; Radoslaw Charkiewicz; Tomasz Wotkowicz                                                                                                                                                                                                                                                                                |
| EPI_ISL_8744780                                                                                                                                                                                                                                                                                                                                                                                                                                                                                                                                                                                                                                                                                                                                                                                                                                                                                                                                                                                                                                                                                                                                                                                                                                                                                                                                                                                                                                                                                                                                                                                                                                                                                                                                                                                                                                                                                                                                                                                                                                                                                                                                                                                                                                                                                                                                                                                                                                                                                                                                                                                                                                                                                                                                                                                                                                                                                                                                                                                                                                                                                                                                                                                     | Narodowy Instytut Zdrowia Publicznego - PZH                                                                           | WSSE w Warszawie                                                                                                                                                                                                                                                                   | Dorota Wagrocka - Rocznik                                                                                                                                                                                                                                                                                                                                                                                                                                                                                                                              |
| EPI_ISL_9018820                                                                                                                                                                                                                                                                                                                                                                                                                                                                                                                                                                                                                                                                                                                                                                                                                                                                                                                                                                                                                                                                                                                                                                                                                                                                                                                                                                                                                                                                                                                                                                                                                                                                                                                                                                                                                                                                                                                                                                                                                                                                                                                                                                                                                                                                                                                                                                                                                                                                                                                                                                                                                                                                                                                                                                                                                                                                                                                                                                                                                                                                                                                                                                                     | National Center of Disease Control and Prevention of the Republic of Armenia, Davidyan Laboratories, Yerevan, Armenia | Institute of Molecular Biology NAS RA, Republic of Armenia, Department of Bioengineering, BioinformaticsInstitute and Molecular Biology IBMF RAU, Republic of Armenia                                                                                                              | Andranik Chavushyan; Ani Melkonyan; Arsen Arakelyan; Diana Avetyan; Gayane Melik-Pashayan; Gisane Khachatyan; Hovsep Ghazaryan; Liit Ghukasyan; Maria Nikoghosyan; Roksana Zakharyan; Shushan Sargsyan; Siras Hakobyan; Tamara Sirunyan                                                                                                                                                                                                                                                                                                                |
| EPI_ISL_9259264, EPI_ISL_9259266, EPI_ISL_9259269                                                                                                                                                                                                                                                                                                                                                                                                                                                                                                                                                                                                                                                                                                                                                                                                                                                                                                                                                                                                                                                                                                                                                                                                                                                                                                                                                                                                                                                                                                                                                                                                                                                                                                                                                                                                                                                                                                                                                                                                                                                                                                                                                                                                                                                                                                                                                                                                                                                                                                                                                                                                                                                                                                                                                                                                                                                                                                                                                                                                                                                                                                                                                   | National Health Laboratory Services                                                                                   | CERI, Centre for Epidemic Response and Innovation, Stellenbosch University and KRISP, KZN Research Innovation and Sequencing Platform, UKZN.                                                                                                                                       | Anyaneji UJ; Giandhari J; Maharaj A; Moir M; Naicker D; Naidoo Y; Nokukhanya Mdlalose; Pillay S; San JE; Tegally H; Tshiabula D; Van Wyk S; Wilkinson E; de Oliveira T                                                                                                                                                                                                                                                                                                                                                                                 |
| EPI_ISL_9149794, EPI_ISL_9149796, EPI_ISL_9149797, EPI_ISL_9149798, EPI_ISL_9149800, EPI_ISL_9149801, EPI_ISL_9149804, EPI_ISL_9149824, EPI_ISL_9149825, EPI_ISL_9149826, EPI_ISL_9149827, EPI_ISL_9149828, EPI_ISL_9149830, EPI_ISL_9149832, EPI_ISL_9149833, EPI_ISL_9149834, EPI_ISL_9149835, EPI_ISL_9149836, EPI_ISL_9149837, EPI_ISL_9149838, EPI_ISL_9149839, EPI_ISL_9149840, EPI_ISL_9149841, EPI_ISL_9149842, EPI_ISL_9149843, EPI_ISL_9149844, EPI_ISL_9149845, EPI_ISL_9149846, EPI_ISL_9149847, EPI_ISL_9149848, EPI_ISL_9149849, EPI_ISL_9149850, EPI_ISL_9149851, EPI_ISL_9149852, EPI_ISL_9149853, EPI_ISL_9149854, EPI_ISL_9149855, EPI_ISL_9149856, EPI_ISL_9149857, EPI_ISL_9149858, EPI_ISL_9149859, EPI_ISL_9149860, EPI_ISL_9149861, EPI_ISL_9149862, EPI_ISL_9149863, EPI_ISL_9149864, EPI_ISL_9149865, EPI_ISL_9149866, EPI_ISL_9149867, EPI_ISL_9149868, EPI_ISL_9149869, EPI_ISL_9149870, EPI_ISL_9149871, EPI_ISL_9149872, EPI_ISL_9149873, EPI_ISL_9149874, EPI_ISL_9149875, EPI_ISL_9149876, EPI_ISL_9149877, EPI_ISL_9149878, EPI_ISL_9149879, EPI_ISL_9149880, EPI_ISL_9149881, EPI_ISL_9149882, EPI_ISL_9149883, EPI_ISL_9149884, EPI_ISL_9149885, EPI_ISL_9149886, EPI_ISL_9149887, EPI_ISL_9149888, EPI_ISL_9149889, EPI_ISL_9149890, EPI_ISL_9149891, EPI_ISL_9149892, EPI_ISL_9149893, EPI_ISL_9149894, EPI_ISL_9149895, EPI_ISL_9149896, EPI_ISL_9149897, EPI_ISL_9149898, EPI_ISL_9149899, EPI_ISL_9149900, EPI_ISL_9149901, EPI_ISL_9149902, EPI_ISL_9149903, EPI_ISL_9149904, EPI_ISL_9149905, EPI_ISL_9149906, EPI_ISL_9149907, EPI_ISL_9149908, EPI_ISL_9149909, EPI_ISL_9149910, EPI_ISL_9149911, EPI_ISL_9149912, EPI_ISL_9149913, EPI_ISL_9149914, EPI_ISL_9149915, EPI_ISL_9149916, EPI_ISL_9149917, EPI_ISL_9149918, EPI_ISL_9149919, EPI_ISL_9149920, EPI_ISL_9149921, EPI_ISL_9149922, EPI_ISL_9149923, EPI_ISL_9149924, EPI_ISL_9149925, EPI_ISL_9149926, EPI_ISL_9149927, EPI_ISL_9149928, EPI_ISL_9149929, EPI_ISL_9149930, EPI_ISL_9149931, EPI_ISL_9149932, EPI_ISL_9149933, EPI_ISL_9149934, EPI_ISL_9149935, EPI_ISL_9149936, EPI_ISL_9149937, EPI_ISL_9149938, EPI_ISL_9149939, EPI_ISL_9149940, EPI_ISL_9149941, EPI_ISL_9149942, EPI_ISL_9149943, EPI_ISL_9149944, EPI_ISL_9149945, EPI_ISL_9149946, EPI_ISL_9149947, EPI_ISL_9149948, EPI_ISL_9149949, EPI_ISL_9149950, EPI_ISL_9149951, EPI_ISL_9149952, EPI_ISL_9149953, EPI_ISL_9149954, EPI_ISL_9149955, EPI_ISL_9149956, EPI_ISL_9149957, EPI_ISL_9149958, EPI_ISL_9149959, EPI_ISL_9149960, EPI_ISL_9149961, EPI_ISL_9149962, EPI_ISL_9149963, EPI_ISL_9149964, EPI_ISL_9149965, EPI_ISL_9149966, EPI_ISL_9149967, EPI_ISL_9149968, EPI_ISL_9149969, EPI_ISL_9149970, EPI_ISL_9149971, EPI_ISL_9149972, EPI_ISL_9149973, EPI_ISL_9149974, EPI_ISL_9149975, EPI_ISL_9149976, EPI_ISL_9149977, EPI_ISL_9149978, EPI_ISL_9149979, EPI_ISL_9149980, EPI_ISL_9149981, EPI_ISL_9149982, EPI_ISL_9149983, EPI_ISL_9149984, EPI_ISL_9149985, EPI_ISL_9149986, EPI_ISL_9149987, EPI_ISL_9149988, EPI_ISL_9149989, EPI_ISL_9149990, EPI_ISL_9149991, EPI_ISL_9149992, EPI_ISL_9149993, EPI_ISL_9149994, EPI_ISL_9149995, EPI_ISL_9149996, EPI_ISL_9149997, EPI_ISL_9149998, EPI_ISL_9149999 | National Health Laboratory Services, Virology                                                                         | Avani Bharathram; Florette K. Treurnicht; Kathleen Subramoney; Nkhensani Mtleni                                                                                                                                                                                                    |                                                                                                                                                                                                                                                                                                                                                                                                                                                                                                                                                        |
| EPI_ISL_9095689, EPI_ISL_9095690, EPI_ISL_9095696, EPI_ISL_9095698, EPI_ISL_9095700, EPI_ISL_9095730, EPI_ISL_9095736, EPI_ISL_9095740, EPI_ISL_9095750, EPI_ISL_9095752, EPI_ISL_9095755, EPI_ISL_9095756, EPI_ISL_9095757, EPI_ISL_9095763, EPI_ISL_9095764, EPI_ISL_9095765, EPI_ISL_9095767, EPI_ISL_9095772, EPI_ISL_9095775, EPI_ISL_9095776, EPI_ISL_9095777, EPI_ISL_9285828, EPI_ISL_9460474, EPI_ISL_9615163, EPI_ISL_9615186, EPI_ISL_9615187, EPI_ISL_9615191                                                                                                                                                                                                                                                                                                                                                                                                                                                                                                                                                                                                                                                                                                                                                                                                                                                                                                                                                                                                                                                                                                                                                                                                                                                                                                                                                                                                                                                                                                                                                                                                                                                                                                                                                                                                                                                                                                                                                                                                                                                                                                                                                                                                                                                                                                                                                                                                                                                                                                                                                                                                                                                                                                                           | National Institute of Health Research & Development (Balitbangkes)                                                    | West Java Health Laboratory; School of Life Sciences and Technology, Institut Teknologi Bandung; National Institute of Health Research & Development                                                                                                                               | Azzania Fibriani; Cut Nur Cynthia Alamanda; Ema Rahmawati; Gusti Ayu Prani Pradani; Hana Apsari Pawestri; Karimatu Khoirunnisa; Karlina Mellyani; Miftahul Faridi; Putri Cahya Destiani; Rebecca Stephanie; Rifky Waluyajati Rachman; Rini Robiani; Ryan Bayusantika Ristandi; Subangkit; Vivi Setiawaty                                                                                                                                                                                                                                               |
| EPI_ISL_9242301, EPI_ISL_9242302, EPI_ISL_9242308, EPI_ISL_9242309                                                                                                                                                                                                                                                                                                                                                                                                                                                                                                                                                                                                                                                                                                                                                                                                                                                                                                                                                                                                                                                                                                                                                                                                                                                                                                                                                                                                                                                                                                                                                                                                                                                                                                                                                                                                                                                                                                                                                                                                                                                                                                                                                                                                                                                                                                                                                                                                                                                                                                                                                                                                                                                                                                                                                                                                                                                                                                                                                                                                                                                                                                                                  | National Institute of Health Research and Development                                                                 | Institute of Tropical Disease, Universitas Airlangga                                                                                                                                                                                                                               | Aldise M Nastri; Erwin Ashta Triyono; Gatot Soegiarto; Hana A Pawestri; Jezzy R Dewantari; Joni Wahyuhadi; Kazufumi Shimizu; Krisnoadi Rahardjo; Laksmi Wulandari; Maria I Lusida; Resti Yudhawati; Rima R Prasetya; Soetjipto; Vivi Setiawaty; Yasuko Mori                                                                                                                                                                                                                                                                                            |
| EPI_ISL_9714835                                                                                                                                                                                                                                                                                                                                                                                                                                                                                                                                                                                                                                                                                                                                                                                                                                                                                                                                                                                                                                                                                                                                                                                                                                                                                                                                                                                                                                                                                                                                                                                                                                                                                                                                                                                                                                                                                                                                                                                                                                                                                                                                                                                                                                                                                                                                                                                                                                                                                                                                                                                                                                                                                                                                                                                                                                                                                                                                                                                                                                                                                                                                                                                     | National Laboratory for Health, Environment and Food, OMM, Maribor                                                    | NLZOH (National Laboratory for Health, Environment and Food) / CILSD (Clinical Institute of Special Laboratory Diagnostics), University Children's Hospital, University Medical Center Ljubljana                                                                                   | Aleksander Kocuvan; Aleksander Mahnic; Alenka Štorman; Ana Grom; Andrej Golle / Jernej Kovač; Barbara Jenko Blizan; Kaja Tominc; Katarina Kozmos; Maja Rupnik; Marko Pokorn; Maruša Debeljak; Maša Jarčič; Mojca Cimerman; Nika Gobec; Nika Volmajer; Robert Šket; Sandra Janežic; Tadej Battelino; Tine Tesovnik; Tjaša Zohar Cretnik                                                                                                                                                                                                                 |
| EPI_ISL_8770504, EPI_ISL_8770505, EPI_ISL_8770506, EPI_ISL_8770507, EPI_ISL_8770508, EPI_ISL_8770509, EPI_ISL_8770510, EPI_ISL_8770511, EPI_ISL_8770513, EPI_ISL_8770515, EPI_ISL_8770516, EPI_ISL_8770518, EPI_ISL_8770519, EPI_ISL_8770520, EPI_ISL_8770521, EPI_ISL_8770522, EPI_ISL_8770523, EPI_ISL_8770524, EPI_ISL_8770525, EPI_ISL_8770526, EPI_ISL_8770527, EPI_ISL_8770528, EPI_ISL_8770531, EPI_ISL_8770532, EPI_ISL_8770533, EPI_ISL_8770535, EPI_ISL_8770537, EPI_ISL_8770539, EPI_ISL_8770542, EPI_ISL_8770543, EPI_ISL_8770549, EPI_ISL_8772219, EPI_ISL_8772220, EPI_ISL_8772221, EPI_ISL_8772222, EPI_ISL_8772223, EPI_ISL_8772224, EPI_ISL_8772225, EPI_ISL_8772226, EPI_ISL_8772227, EPI_ISL_8772228, EPI_ISL_8772229, EPI_ISL_8772230, EPI_ISL_877231, EPI_ISL_877232, EPI_ISL_877233, EPI_ISL_877234, EPI_ISL_877235, EPI_ISL_877236, EPI_ISL_877237, EPI_ISL_877238, EPI_ISL_877239, EPI_ISL_877240, EPI_ISL_877241, EPI_ISL_877242, EPI_ISL_877243, EPI_ISL_877244, EPI_ISL_877245, EPI_ISL_877246, EPI_ISL_877247, EPI_ISL_877248, EPI_ISL_877249, EPI_ISL_877250, EPI_ISL_877251, EPI_ISL_877252, EPI_ISL_877253, EPI_ISL_877254, EPI_ISL_877255, EPI_ISL_877256, EPI_ISL_877259, EPI_ISL_877265, EPI_ISL_877266, EPI_ISL_877271, EPI_ISL_877272, EPI_ISL_877273, EPI_ISL_877276, EPI_ISL_877279, EPI_ISL_877280, EPI_ISL_877281, EPI_ISL_877282, EPI_ISL_877283, EPI_ISL_877286, EPI_ISL_877290, EPI_ISL_877294, EPI_ISL_877295                                                                                                                                                                                                                                                                                                                                                                                                                                                                                                                                                                                                                                                                                                                                                                                                                                                                                                                                                                                                                                                                                                                                                                                                                                                                                                                                                                                                                                                                                                                                                                                                                                                                                                                                           | National Public Health Laboratory, National Centre for Infectious Diseases                                            | Benny Yee; Grace Ngan; Lin Cui; Raymond Tzer Pin Lin; Royce Ang; Samuel Loo; Yichen Ding; Zhenyang Zhou                                                                                                                                                                            |                                                                                                                                                                                                                                                                                                                                                                                                                                                                                                                                                        |
| EPI_ISL_9731834, EPI_ISL_9731835, EPI_ISL_9731851, EPI_ISL_9731852, EPI_ISL_9731867, EPI_ISL_9731912, EPI_ISL_9731956, EPI_ISL_9731957, EPI_ISL_9731959                                                                                                                                                                                                                                                                                                                                                                                                                                                                                                                                                                                                                                                                                                                                                                                                                                                                                                                                                                                                                                                                                                                                                                                                                                                                                                                                                                                                                                                                                                                                                                                                                                                                                                                                                                                                                                                                                                                                                                                                                                                                                                                                                                                                                                                                                                                                                                                                                                                                                                                                                                                                                                                                                                                                                                                                                                                                                                                                                                                                                                             | National Virology Reference Laboratory                                                                                | Microbial Genomic Services                                                                                                                                                                                                                                                         | Haziq Momin; Nor Azian Hafneh; Zainun Zaini                                                                                                                                                                                                                                                                                                                                                                                                                                                                                                            |
| EPI_ISL_8787589, EPI_ISL_8787614                                                                                                                                                                                                                                                                                                                                                                                                                                                                                                                                                                                                                                                                                                                                                                                                                                                                                                                                                                                                                                                                                                                                                                                                                                                                                                                                                                                                                                                                                                                                                                                                                                                                                                                                                                                                                                                                                                                                                                                                                                                                                                                                                                                                                                                                                                                                                                                                                                                                                                                                                                                                                                                                                                                                                                                                                                                                                                                                                                                                                                                                                                                                                                    | Nebraska Public Health Laboratory                                                                                     | NPHL COVID-19 Response Team                                                                                                                                                                                                                                                        | NPHL COVID-19 Response Team                                                                                                                                                                                                                                                                                                                                                                                                                                                                                                                            |
| EPI_ISL_9236229, EPI_ISL_9236230                                                                                                                                                                                                                                                                                                                                                                                                                                                                                                                                                                                                                                                                                                                                                                                                                                                                                                                                                                                                                                                                                                                                                                                                                                                                                                                                                                                                                                                                                                                                                                                                                                                                                                                                                                                                                                                                                                                                                                                                                                                                                                                                                                                                                                                                                                                                                                                                                                                                                                                                                                                                                                                                                                                                                                                                                                                                                                                                                                                                                                                                                                                                                                    | Nidan Path Lab, Gandhinagar                                                                                           | Gujarat Biotechnology Research Centre                                                                                                                                                                                                                                              | Akhilesh Modi; Apurvashin Puvar; Bhadrshsinh Gohil; Chaitanya Joshi; Disha Vora; Himani Patel; Janvi Raval; Jaykumar Rangani; Kanupriya; Madhvi Joshi; Nimesh Patel; Nitin Savaliya; NitinShukla; Priyank Chavda; Ramesh Pandit; Roshani Mishra; Sonal Sharma; Tasnim Trivedi; Zarna Patel                                                                                                                                                                                                                                                             |
| EPI_ISL_9215899                                                                                                                                                                                                                                                                                                                                                                                                                                                                                                                                                                                                                                                                                                                                                                                                                                                                                                                                                                                                                                                                                                                                                                                                                                                                                                                                                                                                                                                                                                                                                                                                                                                                                                                                                                                                                                                                                                                                                                                                                                                                                                                                                                                                                                                                                                                                                                                                                                                                                                                                                                                                                                                                                                                                                                                                                                                                                                                                                                                                                                                                                                                                                                                     | Niedersächsisches Landesgesundheitsamt (NLGA)                                                                         | Robert Koch Institute                                                                                                                                                                                                                                                              |                                                                                                                                                                                                                                                                                                                                                                                                                                                                                                                                                        |
| EPI_ISL_9812169                                                                                                                                                                                                                                                                                                                                                                                                                                                                                                                                                                                                                                                                                                                                                                                                                                                                                                                                                                                                                                                                                                                                                                                                                                                                                                                                                                                                                                                                                                                                                                                                                                                                                                                                                                                                                                                                                                                                                                                                                                                                                                                                                                                                                                                                                                                                                                                                                                                                                                                                                                                                                                                                                                                                                                                                                                                                                                                                                                                                                                                                                                                                                                                     | North Dakota Department of Health, Public Health Laboratory                                                           | North Dakota Department of Health, Public Health Laboratory                                                                                                                                                                                                                        | Lisa Wingenter                                                                                                                                                                                                                                                                                                                                                                                                                                                                                                                                         |
| EPI_ISL_8885511, EPI_ISL_9023231, EPI_ISL_9236221, EPI_ISL_9236231, EPI_ISL_9236235, EPI_ISL_9236236, EPI_ISL_9236237, EPI_ISL_9236238, EPI_ISL_9236239, EPI_ISL_9236240, EPI_ISL_9236241, EPI_ISL_9236271, EPI_ISL_9604320                                                                                                                                                                                                                                                                                                                                                                                                                                                                                                                                                                                                                                                                                                                                                                                                                                                                                                                                                                                                                                                                                                                                                                                                                                                                                                                                                                                                                                                                                                                                                                                                                                                                                                                                                                                                                                                                                                                                                                                                                                                                                                                                                                                                                                                                                                                                                                                                                                                                                                                                                                                                                                                                                                                                                                                                                                                                                                                                                                         | Northstar Pathology Laboratory, Ahmedabad                                                                             | Gujarat Biotechnology Research Centre                                                                                                                                                                                                                                              | Akhilesh Modi; Apurvashin Puvar; Bhadrshsinh Gohil; Chaitanya Joshi; Dhava; Dhyanesh Desai; Disha Vora; Janvi Raval; Jaykumar Rangani; Kanupriya; Madhvi Joshi; Nimesh Patel; Nitin Savaliya; NitinShukla; Priyank Chavda; Ramesh Pandit; Roshani Mishra; Sonal Sharma; Tasnim Trivedi; Umang Gandhi; Zarna Patel                                                                                                                                                                                                                                      |
| EPI_ISL_9354824, EPI_ISL_9554978, EPI_ISL_9555378, EPI_ISL_9555662, EPI_ISL_9555698, EPI_ISL_9556501, EPI_ISL_9557310                                                                                                                                                                                                                                                                                                                                                                                                                                                                                                                                                                                                                                                                                                                                                                                                                                                                                                                                                                                                                                                                                                                                                                                                                                                                                                                                                                                                                                                                                                                                                                                                                                                                                                                                                                                                                                                                                                                                                                                                                                                                                                                                                                                                                                                                                                                                                                                                                                                                                                                                                                                                                                                                                                                                                                                                                                                                                                                                                                                                                                                                               | see above                                                                                                             | Northumbria University / South Tees Hospitals NHS Foundation Trust / North Cumbria Integrated Care NHS Foundation Trust / North Tees and Hartlepool NHS Foundation Trust / Newcastle Hospitals NHS Foundation Trust                                                                | Andrew Nelson; Brendan Payne; Clive Graham; Darren L Smith; Debra Padgett; Edward Barton; Emma Swindells; Garren Scott; Gary Black; Gary Eltringham; Giles S Holt; Greg R Young; Jane Greenaway; Jennifer Collins; John Allan; Joshua Loh; Lynn Dover; Matthew Bashton; Mohammad A Tariq; Paul Baker; Sarah Essex; Steve Liggett; Wen C Yew; Yurisi Taha                                                                                                                                                                                               |
| EPI_ISL_9018413                                                                                                                                                                                                                                                                                                                                                                                                                                                                                                                                                                                                                                                                                                                                                                                                                                                                                                                                                                                                                                                                                                                                                                                                                                                                                                                                                                                                                                                                                                                                                                                                                                                                                                                                                                                                                                                                                                                                                                                                                                                                                                                                                                                                                                                                                                                                                                                                                                                                                                                                                                                                                                                                                                                                                                                                                                                                                                                                                                                                                                                                                                                                                                                     | OKMI                                                                                                                  | University Hospital Brno, CMBG                                                                                                                                                                                                                                                     | Bezdicek Matej; Dolejska Monika; Kristyna Dufkova; Lengeroova Martina; Svaton Jan                                                                                                                                                                                                                                                                                                                                                                                                                                                                      |
| EPI_ISL_9744331                                                                                                                                                                                                                                                                                                                                                                                                                                                                                                                                                                                                                                                                                                                                                                                                                                                                                                                                                                                                                                                                                                                                                                                                                                                                                                                                                                                                                                                                                                                                                                                                                                                                                                                                                                                                                                                                                                                                                                                                                                                                                                                                                                                                                                                                                                                                                                                                                                                                                                                                                                                                                                                                                                                                                                                                                                                                                                                                                                                                                                                                                                                                                                                     | OTHERS - CITY HEALTH OFFICE I                                                                                         | Research Institute for Tropical Medicine                                                                                                                                                                                                                                           | Alexander Sadiasa; Amalea Dulcene D. Nicolasora; Anne Pauline A. Alpino; Ariane Ysabelle S. Demetria; Criselda T. Bautista; Francisco Gerardo M. Polotan; Gerald Ivan Sotelo; Jefferson Earl J. Halog; Joseph Hughes; Joy Mariette L. Pararray; Kirstyn Brunker; Lei Lanna M. Dancel; Ma. Angelica A. Tujan; Mayan Uy-Lumandas; Othoniel Jan T. Onza; Simon Daldry; Timothy John R. Dizon; Vina Lea F. Arguelles; Yao-Tsun Li                                                                                                                          |
| EPI_ISL_9021585                                                                                                                                                                                                                                                                                                                                                                                                                                                                                                                                                                                                                                                                                                                                                                                                                                                                                                                                                                                                                                                                                                                                                                                                                                                                                                                                                                                                                                                                                                                                                                                                                                                                                                                                                                                                                                                                                                                                                                                                                                                                                                                                                                                                                                                                                                                                                                                                                                                                                                                                                                                                                                                                                                                                                                                                                                                                                                                                                                                                                                                                                                                                                                                     | Orebro University Hospital, Dept Laboratory Medicine, Clinical Microbiology                                           | Orebro University Hospital                                                                                                                                                                                                                                                         | Sundqvist M et al                                                                                                                                                                                                                                                                                                                                                                                                                                                                                                                                      |
| EPI_ISL_9294468, EPI_ISL_9294472, EPI_ISL_9457291, EPI_ISL_9495438, EPI_ISL_9495650, EPI_ISL_9495665, EPI_ISL_9495671, EPI_ISL_9495682, EPI_ISL_9495966, EPI_ISL_9498944, EPI_ISL_9499573, EPI_ISL_9502069, EPI_ISL_9502190, EPI_ISL_9502944, EPI_ISL_9503232, EPI_ISL_9504342, EPI_ISL_9589672, EPI_ISL_9589887, EPI_ISL_9590482                                                                                                                                                                                                                                                                                                                                                                                                                                                                                                                                                                                                                                                                                                                                                                                                                                                                                                                                                                                                                                                                                                                                                                                                                                                                                                                                                                                                                                                                                                                                                                                                                                                                                                                                                                                                                                                                                                                                                                                                                                                                                                                                                                                                                                                                                                                                                                                                                                                                                                                                                                                                                                                                                                                                                                                                                                                                   | see above                                                                                                             | Public Health Wales Microbiology Cardiff Wales Specialist Virology Centre                                                                                                                                                                                                          | Alec Birchley; Alexander Adams; Amy Gaskin; Angela Marchbank; Bree Gatica-Wilcox; Catherine Moore; Jason Coombes; Joanne Watkins; Joel Southgate; Johnathan Evans; Laura Gifford; Lauren Gilbert; Lee Graham; Malorie Perry; Matthew Bull; Nicole Pacchiarini; Sally Corden; Sara Kumziene-Summerhayes; Sara Rey; Sarah Taylor; Simon Cottrell; Sophie Jones; Tom Connor                                                                                                                                                                               |
| EPI_ISL_8928431, EPI_ISL_8928434, EPI_ISL_8928436, EPI_ISL_8928460, EPI_ISL_9226415, EPI_ISL_9227206, EPI_ISL_9227212                                                                                                                                                                                                                                                                                                                                                                                                                                                                                                                                                                                                                                                                                                                                                                                                                                                                                                                                                                                                                                                                                                                                                                                                                                                                                                                                                                                                                                                                                                                                                                                                                                                                                                                                                                                                                                                                                                                                                                                                                                                                                                                                                                                                                                                                                                                                                                                                                                                                                                                                                                                                                                                                                                                                                                                                                                                                                                                                                                                                                                                                               | see above                                                                                                             | Oslo University Hospital, Department of Microbiology                                                                                                                                                                                                                               | Norwegian Institute of Public Health, Department of Virology                                                                                                                                                                                                                                                                                                                                                                                                                                                                                           |
| EPI_ISL_9779412, EPI_ISL_9779413, EPI_ISL_9779414, EPI_ISL_9779415, EPI_ISL_9779416                                                                                                                                                                                                                                                                                                                                                                                                                                                                                                                                                                                                                                                                                                                                                                                                                                                                                                                                                                                                                                                                                                                                                                                                                                                                                                                                                                                                                                                                                                                                                                                                                                                                                                                                                                                                                                                                                                                                                                                                                                                                                                                                                                                                                                                                                                                                                                                                                                                                                                                                                                                                                                                                                                                                                                                                                                                                                                                                                                                                                                                                                                                 | Osmania Medical College                                                                                               | Centre for DNA Fingerprinting and Diagnostics                                                                                                                                                                                                                                      | Arvind Yegambaram Meenakshi Sundaram; Cathrine Fladeby; Garcia Llorente Ignacio; Gregor D. Gillfillan; Hilde Elshaug; Hilde Vollan; Jon Bråte; Kamilla Heddeland Instefjord; Karoline Bragstad; Kathrine Stene-Johansen; Line Victoria Moen; Lise Andresen; Marian Nilsen; Masou Holberg-Petersen; Olav Hungnes; Pedersen Benedikte Nevjen; Pål Marius Bjørnstad; Rasmus Riis Kopperud; Teodora Plamenova Ribarska Arunkumar Karunanidhi; Ashwin Dalal; Asmita Gupta; Divya Vashishta; Murali Bashyam; Nagamani Kammili; Rupin Shelake; Vinay Donipadi |
| EPI_ISL_9480347, EPI_ISL_9480682, EPI_ISL_9480694, EPI_ISL_9480695, EPI_ISL_9626068, EPI_ISL_9626069, EPI_ISL_9626072, EPI_ISL_9652303                                                                                                                                                                                                                                                                                                                                                                                                                                                                                                                                                                                                                                                                                                                                                                                                                                                                                                                                                                                                                                                                                                                                                                                                                                                                                                                                                                                                                                                                                                                                                                                                                                                                                                                                                                                                                                                                                                                                                                                                                                                                                                                                                                                                                                                                                                                                                                                                                                                                                                                                                                                                                                                                                                                                                                                                                                                                                                                                                                                                                                                              | see above                                                                                                             | Ostfold Hospital Trust - Kalnes, Centre for Laboratory Medicine, Section for gene technology and infection                                                                                                                                                                         | Norwegian Institute of Public Health, Department of Virology                                                                                                                                                                                                                                                                                                                                                                                                                                                                                           |
|                                                                                                                                                                                                                                                                                                                                                                                                                                                                                                                                                                                                                                                                                                                                                                                                                                                                                                                                                                                                                                                                                                                                                                                                                                                                                                                                                                                                                                                                                                                                                                                                                                                                                                                                                                                                                                                                                                                                                                                                                                                                                                                                                                                                                                                                                                                                                                                                                                                                                                                                                                                                                                                                                                                                                                                                                                                                                                                                                                                                                                                                                                                                                                                                     |                                                                                                                       |                                                                                                                                                                                                                                                                                    | Atiya R Ali; Debec Nadia; Engebretsen Serina Beate; Garcia Llorente Ignacio; Hilde Elshaug; Hilde Nordby Falkenhaus; Hilde Vollan; Jon Bråte; Kamilla Heddeland Instefjord; Karoline Bragstad; Kathrine Stene-Johansen; Line Victoria Moen; Marie Paulsen Madsen; Olav Hungnes; Pedersen Benedikte Nevjen; Rasmus Riis Kopperud                                                                                                                                                                                                                        |

|                                                                                                                                                                                                                                                                                                                                                    |                                                                                                       |                                                                                                                                                                                                                    |                                                                                                                                                                                                                                                                                                                                                                                                                                                            |
|----------------------------------------------------------------------------------------------------------------------------------------------------------------------------------------------------------------------------------------------------------------------------------------------------------------------------------------------------|-------------------------------------------------------------------------------------------------------|--------------------------------------------------------------------------------------------------------------------------------------------------------------------------------------------------------------------|------------------------------------------------------------------------------------------------------------------------------------------------------------------------------------------------------------------------------------------------------------------------------------------------------------------------------------------------------------------------------------------------------------------------------------------------------------|
| EPI_ISL_9234784,<br>EPI_ISL_9234785                                                                                                                                                                                                                                                                                                                | serology<br>PHC Baghchung, Jorhat                                                                     | Centre for Infectious Diseases, CSIR-NEIST                                                                                                                                                                         | G Narahari Sastry; Gayatri Gogoi; Jatin Kalita; Moirangthem G Singh; Munmi Bora; Pankaj Bharali; Romi Wahengbam; Yasmin B Tapaddar                                                                                                                                                                                                                                                                                                                         |
| EPI_ISL_9571339                                                                                                                                                                                                                                                                                                                                    | PKC Kembangan                                                                                         | National Institute of Health Research and Development                                                                                                                                                              | Arie Ardiansyah Nugraha; Fajar Nur Sulistiyohadi; Hana Apsari Pawestri; Hartanti Dian Ikawati; Kartika Dewi Puspa; Nelly Puspandari; Nur Ika Hariastuti; Puri Widia; Subangkit; Vivi Setiawaty                                                                                                                                                                                                                                                             |
| EPI_ISL_9048040,<br>EPI_ISL_9048062,<br>EPI_ISL_9048065,<br>EPI_ISL_9048073,<br>EPI_ISL_9048074                                                                                                                                                                                                                                                    | PPHC-Purdue Unersity                                                                                  | Animal Disease Diagnostic Laboratory, Purdue University College of Veterinary Medicine                                                                                                                             | Jobin Kattoor; Rebecca P Wilkes                                                                                                                                                                                                                                                                                                                                                                                                                            |
| EPI_ISL_9301626                                                                                                                                                                                                                                                                                                                                    | PR Medical Laboratory.                                                                                | Prince of Songkhla University                                                                                                                                                                                      | Anusara Wongkotsila; Chanon Kongkamon; Pongsakorn Choochuen; Samonrapat Surasombatpattana; Sarunyou Chusri; Surakameth Mahasirimongkol; Surasak Sangkhathat; Thammasin Ingviya; Thanit Sila; Virasakdi Chongsuvivatwong; Wison Laochareonsuk                                                                                                                                                                                                               |
| EPI_ISL_9618910,<br>EPI_ISL_9618916,<br>EPI_ISL_9618919                                                                                                                                                                                                                                                                                            | PRVKP FKUI                                                                                            | National Institute of Health Research and Development                                                                                                                                                              | Arie Ardiansyah Nugraha; Fajar Nur Sulistiyohadi; Hana Apsari Pawestri; Hartanti Dian Ikawati; Kartika Dewi Puspa; Nelly Puspandari; Nur Ika Hariastuti; Puri Widia; Subangkit; Vivi Setiawaty                                                                                                                                                                                                                                                             |
| EPI_ISL_9013235, EPI_ISL_9013260, EPI_ISL_9349561, EPI_ISL_9350301, EPI_ISL_9392954, EPI_ISL_9394399, EPI_ISL_9394473                                                                                                                                                                                                                              | see above                                                                                             | Pandemic Response Lab - NYC                                                                                                                                                                                        | Alex Carpio; Cybill del Castillo; Haiping Hao; Isabel Fernandez Escapa; Jon Laurent; Melissa Hopkins; Michael Hammerling; Simran Chhabria; Simran Gupta; Sol Rey; Steven Chase; Tiara Rivera; William Ward                                                                                                                                                                                                                                                 |
| EPI_ISL_8885517                                                                                                                                                                                                                                                                                                                                    | Pandit Dindayal Upadhyay Medical College, Rajkot                                                      | Gujarat Biotechnology Research Centre                                                                                                                                                                              | Akhilesh Modi; Apurvasinh Puvar; Bhadreshsinh Gohil; Chaitanya Joshi; Disha Vora; Janvi Raval; Jaykumar Rangani; Kavathiya; Madhvi Joshi; Nimesh Patel; Nitin Savaliya; NitinShukla; Priyank Chavda; Ramesh Pandit; Roshani Mishra; Sonal Sharma; Tasnim Trivedi; Zarna Patel                                                                                                                                                                              |
| EPI_ISL_9403050,<br>EPI_ISL_9604282,<br>EPI_ISL_9604334                                                                                                                                                                                                                                                                                            | Pangenomics International Pvt. Ltd, Ahmedabad                                                         | Gujarat Biotechnology Research Centre                                                                                                                                                                              | Akhilesh Modi; Apurvasinh Puvar; Bhadreshsinh Gohil; Chaitanya Joshi; Disha Vora; Janvi Raval; Jaykumar Rangani; Madhvi Joshi; Nimesh Patel; Nitin Savaliya; Nitin Shukla; NitinShukla; Priyank Chavda; Ramesh Pandit; Roshani Mishra; Shashi Singh; Sonal Sharma; Tasnim Trivedi; Zarna Patel                                                                                                                                                             |
| EPI_ISL_8859258,<br>EPI_ISL_8859267,<br>EPI_ISL_8859272,<br>EPI_ISL_8937378                                                                                                                                                                                                                                                                        | PathWest Laboratory Medicine WA                                                                       | PathWest Laboratory Medicine WA Microbial Surveillance Unit                                                                                                                                                        | PathWest Laboratory Medicine WA Microbial Surveillance Unit                                                                                                                                                                                                                                                                                                                                                                                                |
| EPI_ISL_8885119,<br>EPI_ISL_9775182,<br>EPI_ISL_9775183,<br>EPI_ISL_9775185,<br>EPI_ISL_9775186,<br>EPI_ISL_9775187                                                                                                                                                                                                                                | Pathocare Pathology Laboratory, Vadodara                                                              | Gujarat Biotechnology Research Centre                                                                                                                                                                              | Akhilesh Modi; Apurvasinh Puvar; Bhadreshsinh Gohil; Chaitanya Joshi; Disha Vora; Janvi Raval; Jaykumar Rangani; Madhvi Joshi; Nimesh Patel; Nitin Savaliya; NitinShukla; Priyank Chavda; Ramesh Pandit; Roshani Mishra; Sonal Sharma; Tasnim Trivedi; Viral Patel; Zarna Patel                                                                                                                                                                            |
| EPI_ISL_9403004,<br>EPI_ISL_9403005                                                                                                                                                                                                                                                                                                                | Perfect Diagnostic, Bharat road, Surat                                                                | Gujarat Biotechnology Research Centre                                                                                                                                                                              | Akhilesh Modi; Apurvasinh Puvar; Bhadreshsinh Gohil; Chaitanya Joshi; Disha Vora; Frenil Munin; Janvi Raval; Jaykumar Rangani; Madhvi Joshi; Nimesh Patel; Nitin Savaliya; Nitin Shukla; Priyank Chavda; Ramesh Pandit; Roshani Mishra; Sonal Sharma; Tasnim Trivedi; Zarna Patel                                                                                                                                                                          |
| EPI_ISL_9079479                                                                                                                                                                                                                                                                                                                                    | Plateforme de testing Namuroise                                                                       | Plateforme de testing Namuroise                                                                                                                                                                                    | Degosserie Jonathan; Demars Aurore; Denis Olivier; Lauranne VERMEERSH; Maschietto Céline; Mullier François; Nobis Chloé; Otto Gaetan                                                                                                                                                                                                                                                                                                                       |
| EPI_ISL_9395014, EPI_ISL_9395015, EPI_ISL_9395016, EPI_ISL_9395032, EPI_ISL_9395038, EPI_ISL_9395056, EPI_ISL_9395059, EPI_ISL_9402660, EPI_ISL_9402662, EPI_ISL_9402663, EPI_ISL_9479754, EPI_ISL_9479755, EPI_ISL_9479756, EPI_ISL_9479757, EPI_ISL_9479758, EPI_ISL_9479759, EPI_ISL_9479760, EPI_ISL_9479761, EPI_ISL_9479762, EPI_ISL_9479763 | see above                                                                                             | Platform BIS UZA/JAntwerpen                                                                                                                                                                                        | Basil Britto Xavier; Christine Lammens; Herman Goossens; Ines Verbesselt; Jasmine Coppens; Kathleen Holemans; Marie Le Mercier; Veerle Matheusssen                                                                                                                                                                                                                                                                                                         |
| EPI_ISL_9267157                                                                                                                                                                                                                                                                                                                                    | Polski Bank Komórek Macierzystych S.A. - Diagnostyka Sp. z o. o.                                      | 1. Tricity SARS-CoV-2 sequencing consortium: University of Gdansk, Medical University of Gdansk, Vaxican Ltd., Invicta Ltd. 2. National Institute of Public Health - National Institute of Hygiene, Warsaw, Poland | Celina Cybulska; Karolina Gackowska; Katarzyna Groth; Katarzyna Zacharczuk; Krystyna Bienkowska Szewczyk; Lukasz Rabalski; Maciej Grzybek; Maciej Kosinski; Magdalena Nowakowska; Marcin Lubocki; Małgorzata Sadkowska-Todys; Tomasz Wołkowiec                                                                                                                                                                                                             |
| EPI_ISL_9100776                                                                                                                                                                                                                                                                                                                                    | Premier Laboratory Servis                                                                             | BioInfoExperts                                                                                                                                                                                                     | Cheryl Metzler; David Nolan; Rebecca Rose; Susanna Lamers; Valerie Murray                                                                                                                                                                                                                                                                                                                                                                                  |
| EPI_ISL_9571198,<br>EPI_ISL_9650420,<br>EPI_ISL_9650425,<br>EPI_ISL_9650473                                                                                                                                                                                                                                                                        | Program Repatriasi Karantina Kementerian Kesehatan RI                                                 | Genomik Solidaritas Indonesia Laboratorium                                                                                                                                                                         | Anna Christina Brazia; Annisa Muthiah Sukirman; Anuraj Shankar; Ariel Pradipta; Carissa Sintca Wijaya; Dhahlia Agustina Cahyono; Gracia Felias Enos Korompis; Louisa Markus; Meutia Ayupiteri Kumaheri; Reinhart Gabriel; Stefanus Bernard; Vivi Setiawaty                                                                                                                                                                                                 |
| EPI_ISL_9651027                                                                                                                                                                                                                                                                                                                                    | Program Repatriasi Karantina Kesehatan Kementerian Kesehatan RI                                       | Genomik Solidaritas Indonesia Laboratorium                                                                                                                                                                         | Aisyi Sakina Rifani; Annisa Muthiah Sukirman; Anuraj Shankar; Ariel Pradipta; Dian Pitaloka Rajaguguk; Esti Rahayuning Tias; Gracia Felias Enos Korompis; Louisa Markus; Meutia Ayupiteri Kumaheri; Stefanus Bernard; Vania Gavrila Wikasa; Vivi Setiawaty                                                                                                                                                                                                 |
| EPI_ISL_9059023,<br>EPI_ISL_9059029,<br>EPI_ISL_9059032                                                                                                                                                                                                                                                                                            | Protect Purdue Health Center (PPHC)                                                                   | Animal Disease Diagnostic Laboratory, Purdue University College of Veterinary Medicine                                                                                                                             | Jobin Kattoor; Rebecca P Wilkes                                                                                                                                                                                                                                                                                                                                                                                                                            |
| EPI_ISL_9029078                                                                                                                                                                                                                                                                                                                                    | Public Health Laboratory, Public Health Laboratory, Public Health Service, Amsterdam, The Netherlands | inBiome                                                                                                                                                                                                            | Donald van Pinxteren; Dries Budding; Martine Bos                                                                                                                                                                                                                                                                                                                                                                                                           |
| EPI_ISL_9101222                                                                                                                                                                                                                                                                                                                                    | Public Health Laboratory, Public Health Service Amsterdam, The Netherlands                            | Department of Medical Microbiology & Infection prevention, Amsterdam University Medical Centers location AMC                                                                                                       | Akke Cornelissen; Fokla Zorgrädrager; Janke Schinkel; Jelle Koopsen; Judith den Uil; Marcel Jonges; Matthijs Welkers; Menno de Jong; Robin van Houdt; Sebastien Matamoros; Sjoerd Rebers; Sylvia Bruisten; Tjalling Leenstra and Mariken van der Lubben on behalf of the Amsterdam Regional Genomic epidemiology and Outbreak Surveillance (ARGOS) consortium                                                                                              |
| EPI_ISL_8783373                                                                                                                                                                                                                                                                                                                                    | Public Health Laboratory, Public Health Service, Amsterdam, The Netherlands                           | inBiome                                                                                                                                                                                                            | Donald van Pinxteren; Dries Budding; Martine Bos                                                                                                                                                                                                                                                                                                                                                                                                           |
| EPI_ISL_9142698, EPI_ISL_9142699, EPI_ISL_9142907, EPI_ISL_9341087, EPI_ISL_9341094, EPI_ISL_9341168, EPI_ISL_9341321, EPI_ISL_9341387, EPI_ISL_9341889, EPI_ISL_9342407, EPI_ISL_9684963, EPI_ISL_9684964, EPI_ISL_9685057                                                                                                                        | see above                                                                                             | Public Health Ontario Laboratory                                                                                                                                                                                   | Aimin Li; Alireza Eshaghi; Andre Villegas; Ashleigh Sullivan; Christine Frantz; Dean Maxwell; Esha Joshi; Jared Simpson; Jennifer L Guthrie; Jonathan B Gubbay; Karthikeyan Sivaraman; Lawrence Heisler; Matthew Watson; Michael CY Li; Michael Laszloffy; Nahuel Fittipaldi; Philip Banh; Richard de Borja; Samir N Patel; Sandeep Nagra; Sandra Zittermann; Sarah Teatero; Vanessa G Allen; Yao Chen; Yogi Sundaravadanam                                |
| EPI_ISL_9311900,<br>EPI_ISL_9560510,<br>EPI_ISL_9587070,<br>EPI_ISL_9610471                                                                                                                                                                                                                                                                        | Quadram Institute Bioscience                                                                          | COVID-19 Genomics UK (COG-UK) Consortium                                                                                                                                                                           | Alexander J Trotter; Ana Martínez Gascuña; Andrew J. Page; Darcie Burgess; Dave J. Baker; Leonardo de Oliveira Martins; Lizzie Meadows; Martin Lott; Michaela Matthews; Nabil-Fareed Alikhan; Rebecca Sutcliffe; Rhiannon Evans; Thanh Le-Viet                                                                                                                                                                                                             |
| EPI_ISL_9628537                                                                                                                                                                                                                                                                                                                                    | Quest Diagnostics Incorporated                                                                        | Centers for Disease Control and Prevention Division of Viral Diseases, Pathogen Discovery                                                                                                                          | A. Gerasimova; A. Perez; B. Anderson; Benjamin Rambo-Martin; Christopher Gulvick; Clinton Paden; Dakota Howard; Dhvani Batra; Duncan MacCannell; Erisa Sula; F. Lacwabna; I. Shlyakhter; Jason Caravas; K. Livingston; Kristine Lacey; L. Bernstein; M. Hua; Matthew Schmerer; P. Tanpaiboon; Peter Cook; R. Kagan; R. Owen; R. Rolando; S. Rosenthal; Scott Sammons; Shatavia Morrison; Tymeckia Kendall; Victoria Caban Figueroa; Y. Liu; Yvette Unorumi |
| EPI_ISL_9744317,<br>EPI_ISL_9744318                                                                                                                                                                                                                                                                                                                | R10-MARIA REYNA XAVIER UNIVERSITY HOSPITAL                                                            | Research Institute for Tropical Medicine                                                                                                                                                                           | Alexander Sadiasa; Anne Pauline A. Alpino; Ardiane Ysabelle M. Dolor; Catalino S. Demetria; Criselda T. Bautista; Francisco Gerardo M. Polotan; Jefferson Earl J. Halog; Joseph Hughes; Kirstyn Brunker; Lei Lanna M. Dancel; Ma. Angelica A. Tujan; Mayan Uy-Lumandas; Othoniel Jan T. Onza; Simon Daldry; Timothy John R. Dizon; Vina Lea F. Arguelles; Yao-Tsun Li                                                                                      |
| EPI_ISL_9744288,<br>EPI_ISL_9744289                                                                                                                                                                                                                                                                                                                | REGION II TRAUMA AND MEDICAL CENTER                                                                   | Research Institute for Tropical Medicine                                                                                                                                                                           | Alexander Sadiasa; Anne Pauline A. Alpino; Ardiane Ysabelle M. Dolor; Catalino S. Demetria; Criselda T. Bautista; Francisco Gerardo M. Polotan; Jefferson Earl J. Halog; Joseph Hughes; Kirstyn Brunker; Lei Lanna M. Dancel; Ma. Angelica A. Tujan; Mayan Uy-Lumandas; Othoniel Jan T. Onza; Simon Daldry; Timothy John R. Dizon; Vina Lea F. Arguelles; Yao-Tsun Li                                                                                      |
| EPI_ISL_9744316                                                                                                                                                                                                                                                                                                                                    | RG CORAZON LOCSIN MONTELIBANO MEMORIAL REGIONAL                                                       | Research Institute for Tropical Medicine                                                                                                                                                                           | Alexander Sadiasa; Anne Pauline A. Alpino; Ardiane Ysabelle M. Dolor; Catalino S. Demetria; Criselda T. Bautista; Francisco Gerardo M. Polotan; Jefferson Earl J. Halog; Joseph Hughes; Kirstyn Brunker; Lei Lanna M. Dancel; Ma. Angelica A. Tujan; Mayan Uy-Lumandas; Othoniel Jan T. Onza; Simon Daldry; Timothy John R. Dizon; Vina Lea F. Arguelles; Yao-Tsun Li                                                                                      |
| EPI_ISL_9019278                                                                                                                                                                                                                                                                                                                                    | RS Ciputra Citra Garden                                                                               | Genomik Solidaritas Indonesia Laboratorium                                                                                                                                                                         | Aisyi Sakina Rifani; Annisa Muthiah Sukirman; Anuraj Shankar; Ariel Pradipta; Carissa Sintca Wijaya; Dian Tri Wahyudi; Esti Rahayuning Tias; Filly Mandalie; Gracia Felias Enos Korompis; Louisa Markus; Meutia Ayupiteri Kumaheri; Stefanus Bernard                                                                                                                                                                                                       |
| EPI_ISL_8886898,<br>EPI_ISL_8886899,<br>EPI_ISL_8886900                                                                                                                                                                                                                                                                                            | RS TNI Al Dr Mintohardjo                                                                              | Genomik Solidaritas Indonesia Laboratorium                                                                                                                                                                         | Aisyi Sakina Rifani; Annisa Muthiah Sukirman; Anuraj Shankar; Ariel Pradipta; Brian; Carissa Sintca Wijaya; Dian Tri Wahyudi; Gracia Felias Enos Korompis; Himawan Masyhuri; Ika; Louisa Markus; Meutia Ayupiteri Kumaheri; Qishti; Stefanus Bernard                                                                                                                                                                                                       |
| EPI_ISL_9697290                                                                                                                                                                                                                                                                                                                                    | Rajshahi Medical College, Rajshahi                                                                    | Virology Laboratory, International Centre for Diarrhoeal Disease Research, Bangladesh (ICDDR,B)                                                                                                                    | ASM Alamgir; Ahmed Nawsher Alam; Araf Mahmud; Dinesh Mondal; Firdausi Qadri; Hassan Afrad; Mahbubur Rahman; Manjur Hossain Khan; Md. Mahfuzur Rahman; Mohammad Enayet Hossain; Mohammad Jubair; Mohammad Shahidul Islam; Mohammed Ziaur Rahman; Moju Mia; Mustafizur Rahman; Razib Mazumder; Sabera Gul Nahar; Samir Kumar Saha; Senjuti Saha; Shovan Basak Moon; Tahmina Shirin                                                                           |
| EPI_ISL_9594529,<br>EPI_ISL_9594530,<br>EPI_ISL_9594531,<br>EPI_ISL_9594532                                                                                                                                                                                                                                                                        | Rangamati Medical College, Rangamati                                                                  | Child Health Research Foundation                                                                                                                                                                                   | ASM Alamgir; Ahmed Nawsher Alam; CHRf Bangladesh Genomics Team; Dinesh Mondal; Firdausi Qadri; Hassan Afrad; Mahbubur Rahman; Manjur Hossain Khan; Mohammad Enayet Hossain; Mohammad Jubair; Mohammad Shahidul Islam; Mohammed Ziaur Rahman; Mustafizur Rahman; Razib Mazumder; Samir Kumar Saha; Senjuti Saha; Shiny Talukder; Tahmina Shirin                                                                                                             |
| EPI_ISL_9401925                                                                                                                                                                                                                                                                                                                                    | Red cross childrens hospital                                                                          | National Institute for Communicable Diseases of the National Health Laboratory Service                                                                                                                             | Amoako DG; Bhiman JN; Everatt J; Ismail A; Kekana D; Mahlangu B; Mnguni A; Mohale T; Ntuli N; Scheepers C; Wolter N                                                                                                                                                                                                                                                                                                                                        |
| EPI_ISL_9128490                                                                                                                                                                                                                                                                                                                                    | Regional Medical Sciences Center 12 Songkhla                                                          | National Institute of Health, Department of Medical Sciences, Ministry of Public Health, Thailand                                                                                                                  | Archawin Rojanawiat; Natchaya Khiahsang; Nuttida Thongpramul; Pakorn Piromtong; Pilailuk Okada; Sirikanda Wimol; Siripaporn Phuyugun; Sunthareeya Waicharoen; Suratchana Mitrat; Thanutsapa Thanadachakul                                                                                                                                                                                                                                                  |
| EPI_ISL_9392280                                                                                                                                                                                                                                                                                                                                    | Regionalny Szpital Specjalistyczny w Grudziądzu                                                       | 1. Tricity SARS-CoV-2 sequencing consortium: University of Gdansk, Medical University of Gdansk, Vaxican Ltd., Invicta Ltd. 2. National Institute of Public Health - National Institute of Hygiene, Warsaw, Poland | Celina Cybulska; Karolina Gackowska; Katarzyna Groth; Katarzyna Zacharczuk; Krystyna Bienkowska Szewczyk; Lukasz Rabalski; Maciej Grzybek; Maciej Kosinski; Magdalena Nowakowska; Marcin Lubocki; Małgorzata Sadkowska-Todys; Tomasz Wołkowiec                                                                                                                                                                                                             |



|                                                                                                                                                                                                                                                                                                                                                                                                                                                                                                                                                                                                                                                                                       |                                                                                         |                                                                                                                          |                                                                                                                                                                                                                                                                                                                                                                                                                                                  |
|---------------------------------------------------------------------------------------------------------------------------------------------------------------------------------------------------------------------------------------------------------------------------------------------------------------------------------------------------------------------------------------------------------------------------------------------------------------------------------------------------------------------------------------------------------------------------------------------------------------------------------------------------------------------------------------|-----------------------------------------------------------------------------------------|--------------------------------------------------------------------------------------------------------------------------|--------------------------------------------------------------------------------------------------------------------------------------------------------------------------------------------------------------------------------------------------------------------------------------------------------------------------------------------------------------------------------------------------------------------------------------------------|
| EPI_ISL_9159291, EPI_ISL_9292017, EPI_ISL_9411618, EPI_ISL_94113355, EPI_ISL_9413566, EPI_ISL_94148199, EPI_ISL_9448212, EPI_ISL_9449546, EPI_ISL_9452656, EPI_ISL_9455401, EPI_ISL_9448212, EPI_ISL_9492114, EPI_ISL_9493075, EPI_ISL_9493601, EPI_ISL_9493774, EPI_ISL_9563143, EPI_ISL_9588767, EPI_ISL_9588777, EPI_ISL_9588794, EPI_ISL_9588806, EPI_ISL_9589046, EPI_ISL_9589048, EPI_ISL_9589072, EPI_ISL_9589367, EPI_ISL_9589371, EPI_ISL_9649480, EPI_ISL_9690466, EPI_ISL_9741011, EPI_ISL_9741472, EPI_ISL_9742020, EPI_ISL_9814355, EPI_ISL_9814432, EPI_ISL_9814473                                                                                                     |                                                                                         |                                                                                                                          |                                                                                                                                                                                                                                                                                                                                                                                                                                                  |
| see above                                                                                                                                                                                                                                                                                                                                                                                                                                                                                                                                                                                                                                                                             | Respiratory Virus Unit, Microbiology Services Colindale, Public Health England          | COVID-19 Genomics UK (COG-UK) Consortium                                                                                 | PHE Covid Sequencing Team                                                                                                                                                                                                                                                                                                                                                                                                                        |
| EPI_ISL_9280291                                                                                                                                                                                                                                                                                                                                                                                                                                                                                                                                                                                                                                                                       | Rhode Island Department of Health                                                       | Infectious Disease Program, Broad Institute of Harvard and MIT                                                           | Adams, G.; Azevedo, K.; B.L.; B.W.; Bauer, M.; Birren; Carter, A.; Chaluvasi, S.; D.J.; DeRuff, K.; Gladden-Young, A.; Huard, R.; J.E.; K.J.; King, E.; Lagerborg, K.; Lemieux; Loreth, C.; Miller, A.; Normandin, E.; P.C.; Park; Pearلمان, L.; Reilly, S.; Rudy, M.; Sabeti; Siddle; Tomkins-Tinch, C.; and MacInnis                                                                                                                           |
| EPI_ISL_9705410, EPI_ISL_9705455, EPI_ISL_9705610, EPI_ISL_9705614, EPI_ISL_9705692, EPI_ISL_9705709                                                                                                                                                                                                                                                                                                                                                                                                                                                                                                                                                                                  | Riga East University Hospital, National Microbiology Reference Laboratory               | Riga East University Hospital, National Microbiology Reference Laboratory; Eurofins Genomics Europe Sequencing GmbH      | Anastasija Žuravlova; Arzu Algulieva; Diāna Dušacka; Dārta Pūpola; Ilva Pole; Jevgenijs Bodrenko; Jūlija Čevere; Kristīne Liepiņa; Oksana Savicka; Reinis Vangravs; Reinis Zeltmatis; Sergejs Nikišins; Ģirts Šķenders                                                                                                                                                                                                                           |
| EPI_ISL_8931211, EPI_ISL_8963969, EPI_ISL_8964491, EPI_ISL_8964762, EPI_ISL_8970340, EPI_ISL_8970387, EPI_ISL_9023455, EPI_ISL_9026952                                                                                                                                                                                                                                                                                                                                                                                                                                                                                                                                                |                                                                                         |                                                                                                                          |                                                                                                                                                                                                                                                                                                                                                                                                                                                  |
| see above                                                                                                                                                                                                                                                                                                                                                                                                                                                                                                                                                                                                                                                                             | Rosalind Franklin Laboratory                                                            | Wellcome Sanger Institute for the COVID-19 Genomics UK (COG-UK) Consortium                                               | Cordelia Langford; David K. Jackson; Dominic Kwiatkowski; Donald Fraser; Ewan Harrison; Ian Johnston; Jeffrey Barrett; John Sillitoe on behalf of the Wellcome Sanger Institute COVID-19 Surveillance Team; Rob Howes; Roberto Amato; Sonia Goncalves; Suki Lee; The Rosalind Franklin Laboratory and Alex Alderton                                                                                                                              |
| EPI_ISL_9572861                                                                                                                                                                                                                                                                                                                                                                                                                                                                                                                                                                                                                                                                       | Royal GD                                                                                | Royal GD                                                                                                                 | Remco Dijkman                                                                                                                                                                                                                                                                                                                                                                                                                                    |
| EPI_ISL_8887362, EPI_ISL_8887366                                                                                                                                                                                                                                                                                                                                                                                                                                                                                                                                                                                                                                                      | Rumah Sakit PELNI                                                                       | Genomik Solidaritas Indonesia Laboratorium                                                                               | Aisyi Sakina Rifani; Annisa Muthiah Sukirman; Anuraj Shankar; Ariel Pradipta; Carissa Sintca Wijaya; Dian Tri Wahyudi; Gracia Felias Enos Korompis; Himawan Masyhuri; Louisa Markus; Meutia Ayuputeri Kumaheri; Sherly; Stefanus Bernard                                                                                                                                                                                                         |
| EPI_ISL_9222758, EPI_ISL_9222761, EPI_ISL_9222769, EPI_ISL_9222838, EPI_ISL_9222839, EPI_ISL_9222841, EPI_ISL_9222844, EPI_ISL_9222846, EPI_ISL_9222847, EPI_ISL_9222850, EPI_ISL_9222851, EPI_ISL_9222852, EPI_ISL_9222853, EPI_ISL_9222855, EPI_ISL_9222856, EPI_ISL_9222858, EPI_ISL_9222860, EPI_ISL_9222861                                                                                                                                                                                                                                                                                                                                                                      |                                                                                         |                                                                                                                          |                                                                                                                                                                                                                                                                                                                                                                                                                                                  |
| see above                                                                                                                                                                                                                                                                                                                                                                                                                                                                                                                                                                                                                                                                             | SA Pathology                                                                            | SA Pathology                                                                                                             | Caitlin Selway; Chuan Kok Lim; Ivan Bastian; Lex Leong; Mark Turra                                                                                                                                                                                                                                                                                                                                                                               |
| EPI_ISL_9303482, EPI_ISL_9303494, EPI_ISL_9303495, EPI_ISL_9303504, EPI_ISL_9303505, EPI_ISL_9303506, EPI_ISL_9303522, EPI_ISL_9303527, EPI_ISL_9303528, EPI_ISL_9303572, EPI_ISL_9303574, EPI_ISL_9303575, EPI_ISL_9303576, EPI_ISL_9303587, EPI_ISL_9303588, EPI_ISL_9303595, EPI_ISL_9303596, EPI_ISL_9303597, EPI_ISL_9303598, EPI_ISL_9303601, EPI_ISL_9303602, EPI_ISL_9303603, EPI_ISL_9303606, EPI_ISL_9303607, EPI_ISL_9303608, EPI_ISL_9303609, EPI_ISL_9303622, EPI_ISL_9303633, EPI_ISL_9303634, EPI_ISL_9303645, EPI_ISL_9303647, EPI_ISL_9303648, EPI_ISL_9303649, EPI_ISL_9303650, EPI_ISL_9303651, EPI_ISL_9303654, EPI_ISL_9303655, EPI_ISL_9303661, EPI_ISL_9303666 |                                                                                         |                                                                                                                          |                                                                                                                                                                                                                                                                                                                                                                                                                                                  |
| see above                                                                                                                                                                                                                                                                                                                                                                                                                                                                                                                                                                                                                                                                             | SARS-CoV-2 testing team, National Institute of Infectious Diseases                      | Pathogen Genomics Center, National Institute of Infectious Diseases                                                      | Hazuka Y Furihata; Kentaro Itokawa; Makoto Kuroda; Masanori Hashino; Masumichi Saito; Naomi Nojiri; Nozomu Hanaoka; Rina Tanaka; Tsuguto Fujimoto; Tsuyoshi Sekizuka                                                                                                                                                                                                                                                                             |
| EPI_ISL_9477330, EPI_ISL_9477346                                                                                                                                                                                                                                                                                                                                                                                                                                                                                                                                                                                                                                                      | SK-Roy Romanow Provincial Laboratory                                                    | Saskatchewan - Roy Romanow Provincial Laboratory (RRPL)                                                                  | Alanna Senecal; Amanda Lang; Anna Majer; Anneliese Landgraf; Elsie Grudeski; Gary Van Domselaar; Grace Seo; Jennifer Tanner; Jessica Minion; Kara Loos; Keith MacKenzie; Meredith Faires; Morag Graham; Natalie Knox; Philip Mabon; Rachel; Rachel DePaulo; Rhiannon Huzarewich; Roy Romanow Provincial Laboratory - Molecular Diagnostics; Russell Mandes; Ryan McDonald; Shari Tyson                                                           |
| EPI_ISL_9163169                                                                                                                                                                                                                                                                                                                                                                                                                                                                                                                                                                                                                                                                       | SP ZOZ Centralny Szpital Kliniczny UM w Lodzi Pracownia Diagnostyki Wirusow Oddechowych | Wojewodzka Stacja Sanitarno-Epidemiologiczna w Lodzi, Oddzial Laboratorijny Mikrobiologii i Parazytologii                | Agnieszka Karnowska; Aleksandra Krawczyk; Danuta Bartczak; Elian Terpo; Katarzyna Kosowska; Lucyna Kochanowska; Marta Gawronska; Martyna Matera; Szymon Konkolewski                                                                                                                                                                                                                                                                              |
| EPI_ISL_9236257                                                                                                                                                                                                                                                                                                                                                                                                                                                                                                                                                                                                                                                                       | SSG Hospital Vadodara                                                                   | Gujarat Biotechnology Research Centre                                                                                    | Akhilesh Modi; Apurvasinh Puvar; Bhadreshsinh Gohil; Chaitanya Joshi; Disha Vora; Janvi Raval; Jaykumar Rangani; Jigna Karia; Madhvi Joshi; Nimesh Patel; Nitin Savaliya; NitinShukla; Priyank Chavda; Ramesh Pandit; Roshani Mishra; Sonal Sharma; Tasnim Trivedi; Zarna Patel                                                                                                                                                                  |
| EPI_ISL_9744329                                                                                                                                                                                                                                                                                                                                                                                                                                                                                                                                                                                                                                                                       | ST. JAMES HOSPITAL, INC.                                                                | Research Institute for Tropical Medicine                                                                                 | Alexander Sadiasa; Amalea Dulcene D. Nicolasora; Anne Pauline A. Aljino; Ardiane Ysabelle M. Dolor; Catalina S. Demetria; Criselda T. Bautista; Francisco Gerardo M. Polotan; Gerald Ivan Sotelo; Jefferson Earl J. Halog; Joseph Hughes; Joy Mariette L. Pararay; Kirstyn Brunker; Lei Lanna M. Dancel; Ma. Angelica A. Tujan; Mayan Uy-Lumandas; Othoniel Jan T. Onza; Simon Daniel; Timothy John R. Dizon; Vina Lea F. Arguelles; Yao-Tsun Li |
| EPI_ISL_9017414, EPI_ISL_9017426, EPI_ISL_9513435, EPI_ISL_9513437                                                                                                                                                                                                                                                                                                                                                                                                                                                                                                                                                                                                                    | SYNLAB                                                                                  | GIGA Medical Genomics                                                                                                    | Bouchra Boujemla; Claire Gourzonès; Cécile Meex; Keith Durkin; Laurent Gillet; Maria Artesi; Marie-Pierre Hayette; Nadine Cambisano; Nathalie Renotte; Olivier Ek; Sébastien Bontems; Vincent Bours                                                                                                                                                                                                                                              |
| EPI_ISL_9453851, EPI_ISL_9453924                                                                                                                                                                                                                                                                                                                                                                                                                                                                                                                                                                                                                                                      | SYNLAB Jena Oncoscreen                                                                  | Robert Koch Institute                                                                                                    |                                                                                                                                                                                                                                                                                                                                                                                                                                                  |
| EPI_ISL_9207288, EPI_ISL_9207299, EPI_ISL_9207401, EPI_ISL_9217459                                                                                                                                                                                                                                                                                                                                                                                                                                                                                                                                                                                                                    | SYNLAB MVZ Berlin                                                                       | Robert Koch Institute                                                                                                    |                                                                                                                                                                                                                                                                                                                                                                                                                                                  |
| EPI_ISL_9107685, EPI_ISL_9107772, EPI_ISL_9108161, EPI_ISL_9108184, EPI_ISL_9108282, EPI_ISL_9207515, EPI_ISL_9207702, EPI_ISL_9207740, EPI_ISL_9207771, EPI_ISL_9207799, EPI_ISL_9207804, EPI_ISL_9207824, EPI_ISL_9218419                                                                                                                                                                                                                                                                                                                                                                                                                                                           |                                                                                         |                                                                                                                          |                                                                                                                                                                                                                                                                                                                                                                                                                                                  |
| see above                                                                                                                                                                                                                                                                                                                                                                                                                                                                                                                                                                                                                                                                             | SYNLAB MVZ Leinfelden-Echterdingen                                                      | Robert Koch Institute                                                                                                    |                                                                                                                                                                                                                                                                                                                                                                                                                                                  |
| EPI_ISL_9083818, EPI_ISL_9102703, EPI_ISL_9107721                                                                                                                                                                                                                                                                                                                                                                                                                                                                                                                                                                                                                                     | SYNLAB MVZ Leverkusen                                                                   | Robert Koch Institute                                                                                                    |                                                                                                                                                                                                                                                                                                                                                                                                                                                  |
| EPI_ISL_9217999                                                                                                                                                                                                                                                                                                                                                                                                                                                                                                                                                                                                                                                                       | SYNLAB MVZ Neustadt a. d. Weinstraße                                                    | Robert Koch Institute                                                                                                    |                                                                                                                                                                                                                                                                                                                                                                                                                                                  |
| EPI_ISL_9207432, EPI_ISL_9207436, EPI_ISL_9207506, EPI_ISL_9207630, EPI_ISL_9207830, EPI_ISL_9207906, EPI_ISL_9217687, EPI_ISL_9217825, EPI_ISL_9218373, EPI_ISL_9218394, EPI_ISL_9231074, EPI_ISL_9231521                                                                                                                                                                                                                                                                                                                                                                                                                                                                            |                                                                                         |                                                                                                                          |                                                                                                                                                                                                                                                                                                                                                                                                                                                  |
| see above                                                                                                                                                                                                                                                                                                                                                                                                                                                                                                                                                                                                                                                                             | SYNLAB MVZ Weiden                                                                       | Robert Koch Institute                                                                                                    |                                                                                                                                                                                                                                                                                                                                                                                                                                                  |
| EPI_ISL_9610184                                                                                                                                                                                                                                                                                                                                                                                                                                                                                                                                                                                                                                                                       | Sanjeevani Metropolis, Rajkot                                                           | Gujarat Biotechnology Research Centre                                                                                    | Akhilesh Modi; Apurvasinh Puvar; Bhadreshsinh Gohil; Chaitanya Joshi; Disha Vora; Janvi Raval; Jaykumar Rangani; Madhvi Joshi; Nimesh Patel; Nitin Savaliya; NitinShukla; Priyank Chavda; Ramesh Pandit; Roshani Mishra; Shafrquat Jahan; Sonal Sharma; Tasnim Trivedi; Zarna Patel                                                                                                                                                              |
| EPI_ISL_9638200, EPI_ISL_9638309                                                                                                                                                                                                                                                                                                                                                                                                                                                                                                                                                                                                                                                      | Seattle Flu Study                                                                       | Seattle Flu Study                                                                                                        | Amanda Adler; Barry R. Lutz; Benjamin Pelle; Caitlin R. Wolf; Chris D. Frazar; Deborah A. Nickerson; Elisabeth Brandstetter; Erica Ryke; Helen Y. Chu; Janet A. Englund; Jay Shendure; Jover Lee; Kairsten Fay; Kirsten Lacombe; Lea M. Starita; Mark J. Rieder; Matthew Richardson; Matthew Thompson; Melissa Truong; Michael Boeckh; Michael Famulare; Misja Ilcisin; Peter D. Han; Thomas R. Sibley; Trevor Bedford                           |
| EPI_ISL_9697268, EPI_ISL_9697270, EPI_ISL_9697271                                                                                                                                                                                                                                                                                                                                                                                                                                                                                                                                                                                                                                     | Shaheed M Monsur Ali Medical College, Sirajgonj                                         | Virology Laboratory, International Centre for Diarrhoeal Disease Research, Bangladesh (ICDDR,B)                          | ASM Alamgir; Ahmed Nawsher Alam; Araf Mahmud; Dinesh Mondal; Firdausi Qadri; Hassan Afrad; Mahbubur Rahman; Manjur Hossain Khan; Md. Mahfuzur Rahman; Mohammad Enayet Hossain; Mohammad Jubair; Mohammad Shahidul Islam; Mohammed Ziaur Rahman; Moju Mia; Mustafizur Rahman; Razib Mazumder; Samir Kumar Saha; Senjuti Saha; Sharmili Paul; Shovan Basak Moon; Tahmina Shirin                                                                    |
| EPI_ISL_9697279, EPI_ISL_9697280, EPI_ISL_9697281, EPI_ISL_9697282                                                                                                                                                                                                                                                                                                                                                                                                                                                                                                                                                                                                                    | Shaheed Ziaur Rahman Medical College, Bogura                                            | Virology Laboratory, International Centre for Diarrhoeal Disease Research, Bangladesh (ICDDR,B)                          | ASM Alamgir; Ahmed Nawsher Alam; Araf Mahmud; Dinesh Mondal; Firdausi Qadri; Hassan Afrad; Mahbubur Rahman; Manjur Hossain Khan; Md. Mahfuzur Rahman; Mohammad Enayet Hossain; Mohammad Jubair; Mohammad Shahidul Islam; Mohammed Ziaur Rahman; Mohnsina Alam Shaheed; Moju Mia; Mustafizur Rahman; Razib Mazumder; Samir Kumar Saha; Senjuti Saha; Shovan Basak Moon; Tahmina Shirin                                                            |
| EPI_ISL_9610630, EPI_ISL_9610632, EPI_ISL_9610675, EPI_ISL_9610909                                                                                                                                                                                                                                                                                                                                                                                                                                                                                                                                                                                                                    | Shamir Medical Center (Asaf Harofe)                                                     | Shamir Medical Center (Asaf Harofe)                                                                                      | Abu Hamad Ramzia; Adina Bar Chaim; Alona Frenkel; Anna Visnevsky; Chen Weiner; Nir Rainy; Patricia Benveniste-Lekovitz; Reut Sorek Abramovich; Yevgeni Yegorov                                                                                                                                                                                                                                                                                   |
| EPI_ISL_9697259, EPI_ISL_9697260, EPI_ISL_9697261, EPI_ISL_9697262                                                                                                                                                                                                                                                                                                                                                                                                                                                                                                                                                                                                                    | Sher- E -Bangla Medical College, Barishal                                               | Virology Laboratory, International Centre for Diarrhoeal Disease Research, Bangladesh (ICDDR,B)                          | A K M Akbar Kabir; ASM Alamgir; Ahmed Nawsher Alam; Araf Mahmud; Dinesh Mondal; Firdausi Qadri; Hassan Afrad; Mahbubur Rahman; Manjur Hossain Khan; Md. Mahfuzur Rahman; Mohammad Enayet Hossain; Mohammad Jubair; Mohammad Shahidul Islam; Mohammed Ziaur Rahman; Moju Mia; Mustafizur Rahman; Razib Mazumder; Samir Kumar Saha; Senjuti Saha; Shovan Basak Moon; Tahmina Shirin                                                                |
| EPI_ISL_9593105, EPI_ISL_9593127, EPI_ISL_9593133, EPI_ISL_9593135, EPI_ISL_9593150, EPI_ISL_9593170                                                                                                                                                                                                                                                                                                                                                                                                                                                                                                                                                                                  | Sirindhorn Hospital                                                                     | Division of Genomic Medicine and Innovation support, Department of Medical Sciences, Ministry of Public Health, Thailand | Archawin Rojanawitwat; Jirapha Pakdee; Natthakul Bunneang; Nuanjinn Wichukhinda; Penpitcha Thawong; Pilailuk Akkapaiboon Okada; Pundharika Piboonsiri; Surakameth Mahasirimongkol; Waritta Sawaengdee                                                                                                                                                                                                                                            |
| EPI_ISL_9715870                                                                                                                                                                                                                                                                                                                                                                                                                                                                                                                                                                                                                                                                       | Sonic - Bioscientia - MVZ Labor Saar GmbH                                               | Robert Koch Institute                                                                                                    |                                                                                                                                                                                                                                                                                                                                                                                                                                                  |
| EPI_ISL_9228871, EPI_ISL_9228993, EPI_ISL_9229000, EPI_ISL_9229364, EPI_ISL_9443450, EPI_ISL_9444022, EPI_ISL_9444335                                                                                                                                                                                                                                                                                                                                                                                                                                                                                                                                                                 |                                                                                         |                                                                                                                          |                                                                                                                                                                                                                                                                                                                                                                                                                                                  |
| see above                                                                                                                                                                                                                                                                                                                                                                                                                                                                                                                                                                                                                                                                             | Sonic - Labor Dr. von Foreich GmbH                                                      | Robert Koch Institute                                                                                                    |                                                                                                                                                                                                                                                                                                                                                                                                                                                  |
| EPI_ISL_9444375                                                                                                                                                                                                                                                                                                                                                                                                                                                                                                                                                                                                                                                                       | Sonic - Labor Staber Dresden (Klipphausen)                                              | Robert Koch Institute                                                                                                    |                                                                                                                                                                                                                                                                                                                                                                                                                                                  |
| EPI_ISL_9257600                                                                                                                                                                                                                                                                                                                                                                                                                                                                                                                                                                                                                                                                       | Spital Langenthal                                                                       | Medizinische Klinik, Spital Region Oberaargau                                                                            | Alexander Imhof; Cedric Howald; Deborah Penet; Henri Pegeot; Ioannis Xenarios; Keith Harshman; Lorenzo Cerutti; Melyssa Elies                                                                                                                                                                                                                                                                                                                    |
| EPI_ISL_8799316                                                                                                                                                                                                                                                                                                                                                                                                                                                                                                                                                                                                                                                                       | Star Hospital                                                                           | Molecular and Genomics Research Lab, Dhulikhel Hospital, Kathmandu University Hospital                                   | Dipesh Tamrakar; Nishan Katuwal; Rajeev Shrestha; Surendra Kumar Madhup                                                                                                                                                                                                                                                                                                                                                                          |
| EPI_ISL_8953657, EPI_ISL_9196278, EPI_ISL_9196320                                                                                                                                                                                                                                                                                                                                                                                                                                                                                                                                                                                                                                     | State Laboratories Division, Hawaii State Department of Health                          | State Laboratories Division, Hawaii State Department of Health                                                           | Ayana Garnet; Briana Ofilas; Cheryl-Lynn Daquig; Cheyenne Barela; Daniel Strange; Drew Kuwazaki; Edward Desmond; Jeffrey Au; Mark Nagata; Pamela O'Brien; Razvan Sultana; Remedios Gose; Samantha Cotter; Samantha Sruba                                                                                                                                                                                                                         |
| EPI_ISL_9402974, EPI_ISL_9402976                                                                                                                                                                                                                                                                                                                                                                                                                                                                                                                                                                                                                                                      | Sterling Diagnostic Center, Bhavnagar                                                   | Gujarat Biotechnology Research Centre                                                                                    | Akhilesh Modi; Apurvasinh Puvar; Bhadreshsinh Gohil; Chaitanya Joshi; Disha Vora; Janvi Raval; Jaykumar Rangani; Krupal Hapani; Madhvi Joshi; Nimesh Patel; Nitin Savaliya; Nitin Shukla; Priyank Chavda; Ramesh Pandit; Roshani Mishra; Sonal Sharma; Tasnim Trivedi; Zarna Patel                                                                                                                                                               |
| EPI_ISL_9236222                                                                                                                                                                                                                                                                                                                                                                                                                                                                                                                                                                                                                                                                       | Sunflower Laboratory, Memnagar, Ahmedabad                                               | Gujarat Biotechnology Research Centre                                                                                    | Akhilesh Modi; Apurvasinh Puvar; Bhadreshsinh Gohil; Chaitanya Joshi; D.G.Patel; Disha Vora; Janvi Raval; Jaykumar Rangani; Madhvi Joshi; Nimesh Patel; Nitin Savaliya; Nitin Shukla; Priyank Chavda; Ramesh Pandit; Roshani Mishra; Sonal Sharma; Tasnim Trivedi; Zarna Patel                                                                                                                                                                   |
| EPI_ISL_9403022, EPI_ISL_9403023, EPI_ISL_9403024, EPI_ISL_9403025, EPI_ISL_9403026, EPI_ISL_9403028, EPI_ISL_9403029                                                                                                                                                                                                                                                                                                                                                                                                                                                                                                                                                                 |                                                                                         |                                                                                                                          |                                                                                                                                                                                                                                                                                                                                                                                                                                                  |

|                                                                                                                                                                                                                                                                                                                                                                                                                                                                                                                                                                                                                                                                                                                                                                                                                                                                                                                                                                                                                                                                                              |                                                                                                                                  |                                                                                                                                                                                                                    |                                                                                                                                                                                                                                                                                                                                                                              |
|----------------------------------------------------------------------------------------------------------------------------------------------------------------------------------------------------------------------------------------------------------------------------------------------------------------------------------------------------------------------------------------------------------------------------------------------------------------------------------------------------------------------------------------------------------------------------------------------------------------------------------------------------------------------------------------------------------------------------------------------------------------------------------------------------------------------------------------------------------------------------------------------------------------------------------------------------------------------------------------------------------------------------------------------------------------------------------------------|----------------------------------------------------------------------------------------------------------------------------------|--------------------------------------------------------------------------------------------------------------------------------------------------------------------------------------------------------------------|------------------------------------------------------------------------------------------------------------------------------------------------------------------------------------------------------------------------------------------------------------------------------------------------------------------------------------------------------------------------------|
| see above                                                                                                                                                                                                                                                                                                                                                                                                                                                                                                                                                                                                                                                                                                                                                                                                                                                                                                                                                                                                                                                                                    | Supratech Micropath Diagnostics & Research laboratory Ahmedabad                                                                  | Gujarat Biotechnology Research Centre                                                                                                                                                                              | Akhilesh Modi; Ameer Shukla; Apurvasinh Puvar; Bhadreshsinh Gohil; Chaitanya Joshi; Disha Vora; Janvi Raval; Jaykumar Rangani; Madhvi Joshi; Nimesh Patel; Nitin Savaliya; Nitin Shukla; Priyank Chavda; Ramesh Pandit; Roshani Mishra; Sonal Sharma; Tasnim Trivedi; Zarna Patel                                                                                            |
| EPI_ISL_9610221                                                                                                                                                                                                                                                                                                                                                                                                                                                                                                                                                                                                                                                                                                                                                                                                                                                                                                                                                                                                                                                                              | Supratech Micropath Laboratory, Surat                                                                                            | Gujarat Biotechnology Research Centre                                                                                                                                                                              | Akhilesh Modi; Apurvasinh Puvar; Bhadreshsinh Gohil; Chaitanya Joshi; Disha Vora; Janvi Raval; Jaykumar Rangani; Madhvi Joshi; Manthan Shah; Nimesh Patel; Nitin Savaliya; NitinShukla; Priyank Chavda; Ramesh Pandit; Roshani Mishra; Sonal Sharma; Tasnim Trivedi; Zarna Patel                                                                                             |
| EPI_ISL_9403008, EPI_ISL_9610167, EPI_ISL_9610224, EPI_ISL_9610225, EPI_ISL_9610227, EPI_ISL_9610253, EPI_ISL_9696293                                                                                                                                                                                                                                                                                                                                                                                                                                                                                                                                                                                                                                                                                                                                                                                                                                                                                                                                                                        | Surat Municipal Institute of Medical Education and Research (SMIMER), Surat                                                      | Gujarat Biotechnology Research Centre                                                                                                                                                                              | Akhilesh Modi; Apurvasinh Puvar; Bhadreshsinh Gohil; Chaitanya Joshi; Disha Vora; Janvi Raval; Jaykumar Rangani; Madhvi Joshi; Manish Patel; Nimesh Patel; Nitin Savaliya; Nitin Shukla; NitinShukla; Priyank Chavda; Ramesh Pandit; Roshani Mishra; Sonal Sharma; Tasnim Trivedi; Zarna Patel                                                                               |
| EPI_ISL_9169954, EPI_ISL_9169955, EPI_ISL_9416418, EPI_ISL_9416477, EPI_ISL_9416478, EPI_ISL_9416485                                                                                                                                                                                                                                                                                                                                                                                                                                                                                                                                                                                                                                                                                                                                                                                                                                                                                                                                                                                         | Sweden, Sodermanland, Unilabs                                                                                                    | Unilabs, Eskilstuna, Sweden                                                                                                                                                                                        | Emma Arvidsson                                                                                                                                                                                                                                                                                                                                                               |
| EPI_ISL_9416161, EPI_ISL_9416170, EPI_ISL_9416171, EPI_ISL_9416172, EPI_ISL_9416175, EPI_ISL_9416180, EPI_ISL_9416182, EPI_ISL_9416188, EPI_ISL_9416194, EPI_ISL_9416196, EPI_ISL_9416197, EPI_ISL_9416199, EPI_ISL_9416227, EPI_ISL_9416228, EPI_ISL_9416236, EPI_ISL_9416238, EPI_ISL_9416240, EPI_ISL_9416260, EPI_ISL_9416266, EPI_ISL_9416267, EPI_ISL_9416273, EPI_ISL_9416288, EPI_ISL_9416396, EPI_ISL_9416401, EPI_ISL_9416402, EPI_ISL_9416424                                                                                                                                                                                                                                                                                                                                                                                                                                                                                                                                                                                                                                     | Sweden, Vastragotaland, Unilabs                                                                                                  | Unilabs, Eskilstuna, Sweden                                                                                                                                                                                        | Emma Arvidsson                                                                                                                                                                                                                                                                                                                                                               |
| EPI_ISL_9180209, EPI_ISL_9180215, EPI_ISL_9180216, EPI_ISL_9180217, EPI_ISL_9180218, EPI_ISL_9180220, EPI_ISL_9180221, EPI_ISL_9180222, EPI_ISL_9180223, EPI_ISL_9180224, EPI_ISL_9180227, EPI_ISL_9180228, EPI_ISL_9180232, EPI_ISL_9180233, EPI_ISL_9180234, EPI_ISL_9180236, EPI_ISL_9180238, EPI_ISL_9180239, EPI_ISL_9180240, EPI_ISL_9180301, EPI_ISL_9180306, EPI_ISL_9180308, EPI_ISL_9180309, EPI_ISL_9180312, EPI_ISL_9180317, EPI_ISL_9180324, EPI_ISL_9180325, EPI_ISL_9180339, EPI_ISL_9180342, EPI_ISL_9180343, EPI_ISL_9180346, EPI_ISL_9180347, EPI_ISL_9180349, EPI_ISL_9180354, EPI_ISL_9180360, EPI_ISL_9180361, EPI_ISL_9180367, EPI_ISL_9180371, EPI_ISL_9180372, EPI_ISL_9180374, EPI_ISL_9180378, EPI_ISL_9180383, EPI_ISL_9180392, EPI_ISL_9180408, EPI_ISL_9180411, EPI_ISL_9180418, EPI_ISL_9180419, EPI_ISL_9180421, EPI_ISL_9180426, EPI_ISL_9180427, EPI_ISL_9180428, EPI_ISL_9180434, EPI_ISL_9180439, EPI_ISL_9180447, EPI_ISL_9180455, EPI_ISL_9180458, EPI_ISL_9180462, EPI_ISL_9180465, EPI_ISL_9180467, EPI_ISL_9180469, EPI_ISL_9180471, EPI_ISL_9180474 | Sweden/Sodermanland/Unilabs                                                                                                      | Unilabs/Eskilstuna/Sweden                                                                                                                                                                                          | Emma Arvidsson                                                                                                                                                                                                                                                                                                                                                               |
| EPI_ISL_9696677, EPI_ISL_9696783, EPI_ISL_9696814                                                                                                                                                                                                                                                                                                                                                                                                                                                                                                                                                                                                                                                                                                                                                                                                                                                                                                                                                                                                                                            | Sweden/Vastragotaland/Unilabs                                                                                                    | Unilabs/Eskilstuna/Sweden                                                                                                                                                                                          | Emma Arvidsson                                                                                                                                                                                                                                                                                                                                                               |
| EPI_ISL_9023227, EPI_ISL_9023239, EPI_ISL_9234041, EPI_ISL_9236163, EPI_ISL_9236166, EPI_ISL_9236242, EPI_ISL_9236243, EPI_ISL_9236244, EPI_ISL_9236245, EPI_ISL_9236246, EPI_ISL_9236247, EPI_ISL_9236248, EPI_ISL_9236249, EPI_ISL_9236250, EPI_ISL_9236251, EPI_ISL_9236272, EPI_ISL_9236273, EPI_ISL_9236276, EPI_ISL_9610174, EPI_ISL_9610175, EPI_ISL_9610176, EPI_ISL_9610177, EPI_ISL_9610178                                                                                                                                                                                                                                                                                                                                                                                                                                                                                                                                                                                                                                                                                        | Symmers Pathocare Laboratory -Ahmedabad                                                                                          | Gujarat Biotechnology Research Centre                                                                                                                                                                              | Akhilesh Modi; Apurvasinh Puvar; Bhadreshsinh Gohil; Chaitanya Joshi; Disha Vora; Janvi Raval; Jaykumar Rangani; Madhvi Joshi; Nimesh Patel; Nitin Savaliya; NitinShukla; Priyank Chavda; Ramesh Pandit; Roshani Mishra; Sonal Sharma; Tasnim Trivedi; Tushar Toprani; Umang Gandhi; Zarna Patel                                                                             |
| EPI_ISL_9698121, EPI_ISL_9698125, EPI_ISL_9698130, EPI_ISL_9698131, EPI_ISL_9698136                                                                                                                                                                                                                                                                                                                                                                                                                                                                                                                                                                                                                                                                                                                                                                                                                                                                                                                                                                                                          | Synlab Eesti OÜ                                                                                                                  | 1. Laboratory of Communicable Diseases (Estonia);<br>2. Eurofins Genomics Europe Sequencing GmbH                                                                                                                   | Abroi A.; Avi R.; Dotsenko L.; Epstein J.; Hoidmets D.; Huik K.; Härma M.-A.; Jaanisoo E.; Kaarna K.; Kallas E.; Koppel I.; Kuzmin I.; Laheasaare A.; Lutsar I.; Metspalu M.; Milani L.; Naaber P.; Niglas H.; Oopkaup O.E.; Pauskar M.; Peterson H.; Päll T.; Ratnik K.; Raudvere U.; Reisberg T.; Sadikova O.; Sepp H.; Shablinskaja A.; Sulja H.; Talas U.G.; Trusalus K. |
| EPI_ISL_9208083, EPI_ISL_9208169, EPI_ISL_9208224                                                                                                                                                                                                                                                                                                                                                                                                                                                                                                                                                                                                                                                                                                                                                                                                                                                                                                                                                                                                                                            | Synlab MVZ Augsburg                                                                                                              | Robert Koch Institute                                                                                                                                                                                              |                                                                                                                                                                                                                                                                                                                                                                              |
| EPI_ISL_9392316                                                                                                                                                                                                                                                                                                                                                                                                                                                                                                                                                                                                                                                                                                                                                                                                                                                                                                                                                                                                                                                                              | Szpital Uniwersytecki Nr 1 w Bydgoszczy im. dra Antoniego Jurasa w Bydgoszczy                                                    | 1. Tricity SARS-CoV-2 sequencing consortium: University of Gdansk, Medical University of Gdansk, Vaxican Ltd., Invicta Ltd. 2. National Institute of Public Health - National Institute of Hygiene, Warsaw, Poland | Celina Cybulska; Karolina Gackowska; Katarzyna Groth; Katarzyna Zacharczuk; Krystyna Bienkowska Szewczyk; Lukasz Rabalski; Maciej Grzybek; Maciej Kosinski; Magdalena Nowakowska; Marcin Lubocki; Małgorzata Sadkowska-Todys; Tomasz Wolkowicz                                                                                                                               |
| EPI_ISL_9432408                                                                                                                                                                                                                                                                                                                                                                                                                                                                                                                                                                                                                                                                                                                                                                                                                                                                                                                                                                                                                                                                              | Szpital Uniwersytecki w Krakowie                                                                                                 | 1. Academic Center for Pathomorphological and Genetic-Molecular Diagnostics ltd, Białystok, Poland 2. National Institute of Public Health - National Institute of Hygiene, Warsaw, Poland                          | Anetta Sulewska; Jacek Nikliński; Janusz Dzieciół; Joanna Kiłuk; Katarzyna Zacharczuk; Konrad Raczkowski; Magdalena Nowakowska; Małgorzata Sadkowska-Todys; Piotr Karabowicz; Piotr Majewski; Przemyslaw Bieчек. Joanna Reszeć; Radosław Charkiewicz; Tomasz Wolkowicz                                                                                                       |
| EPI_ISL_9378414, EPI_ISL_9378915                                                                                                                                                                                                                                                                                                                                                                                                                                                                                                                                                                                                                                                                                                                                                                                                                                                                                                                                                                                                                                                             | TGen North                                                                                                                       | TGen North                                                                                                                                                                                                         | "Jolene Bowers; Brett Van Tassel; Chris French; Darrin Lemmer; Dave Engelthaler"; Hayley Yaglom; Heather Centner                                                                                                                                                                                                                                                             |
| EPI_ISL_9402191                                                                                                                                                                                                                                                                                                                                                                                                                                                                                                                                                                                                                                                                                                                                                                                                                                                                                                                                                                                                                                                                              | TSHEPONG LABORATORY                                                                                                              | National Institute for Communicable Diseases of the National Health Laboratory Service                                                                                                                             | Amoako DG; Bhiman JN; Everatt J; Ismail A; Kekana D; Mahlangu B; Mnguni A; Mohale T; Ntuli N; Scheepers C; Wolter N                                                                                                                                                                                                                                                          |
| EPI_ISL_9592916                                                                                                                                                                                                                                                                                                                                                                                                                                                                                                                                                                                                                                                                                                                                                                                                                                                                                                                                                                                                                                                                              | Taksin hospital                                                                                                                  | Division of Genomic Medicine and Innovation support, Department of Medical Sciences, Ministry of Public Health, Thailand                                                                                           | Archawin Rojanawitwat; Jirapha Pakdee; Natthakul Bunneang; Nuanjun Wichukhinda; Penpitcha Thawong; Pilailuk Akkapaiboon Okada; Pundharika Piboonsiri; Surakameth Mahasirimongkol; Waritta Sawaengdee                                                                                                                                                                         |
| EPI_ISL_9033967, EPI_ISL_9034021, EPI_ISL_9034023, EPI_ISL_9034047, EPI_ISL_9034408                                                                                                                                                                                                                                                                                                                                                                                                                                                                                                                                                                                                                                                                                                                                                                                                                                                                                                                                                                                                          | The Ohio State University Applied Microbiology Services Laboratory                                                               | The Ohio State University Applied Microbiology Services Laboratory                                                                                                                                                 | Seth A. Faith PhD                                                                                                                                                                                                                                                                                                                                                            |
| EPI_ISL_9418842                                                                                                                                                                                                                                                                                                                                                                                                                                                                                                                                                                                                                                                                                                                                                                                                                                                                                                                                                                                                                                                                              | Tokyo Metropolitan Institute of Public Health                                                                                    | Tokyo Metropolitan Institute of Public Health                                                                                                                                                                      | Akane Negishi; Arisa Amano; Hirofumi Miyake; Jun Suzuki; Kenji Sadamasu; Kenshirou Kuroki; Mami Nagashima; Masaki Hayashi; Maya Isogai; Takako Yamazaki; Takushi Fujiwara                                                                                                                                                                                                    |
| EPI_ISL_9236200, EPI_ISL_9236200, EPI_ISL_9236252, EPI_ISL_9236253, EPI_ISL_9236254, EPI_ISL_9610198, EPI_ISL_9610200, EPI_ISL_9610201, EPI_ISL_9610202, EPI_ISL_9610203, EPI_ISL_9610215                                                                                                                                                                                                                                                                                                                                                                                                                                                                                                                                                                                                                                                                                                                                                                                                                                                                                                    | Toprani Advance lab Systems, Vadodara                                                                                            | Gujarat Biotechnology Research Centre                                                                                                                                                                              | Akhilesh Modi; Apurvasinh Puvar; Bhadreshsinh Gohil; Chaitanya Joshi; Disha Vora; Janvi Raval; Jaykumar Rangani; Kanupriya; Madhvi Joshi; Nimesh Patel; Nitin Savaliya; NitinShukla; Priyank Chavda; Ramesh Pandit; Roshani Mishra; Sonal Sharma; Tasnim Trivedi; Tushar Toprani; Zarna Patel                                                                                |
| EPI_ISL_9313624, EPI_ISL_9313626, EPI_ISL_9313628, EPI_ISL_9313629, EPI_ISL_9313630, EPI_ISL_9313635, EPI_ISL_9437477, EPI_ISL_9551423, EPI_ISL_9551426                                                                                                                                                                                                                                                                                                                                                                                                                                                                                                                                                                                                                                                                                                                                                                                                                                                                                                                                      | UC Davis Genome Center                                                                                                           | UC Davis Genome Center                                                                                                                                                                                             | Healthy Davis Together; UC Davis; UC Davis Genome Center                                                                                                                                                                                                                                                                                                                     |
| EPI_ISL_9002911, EPI_ISL_9002919, EPI_ISL_9002929, EPI_ISL_9003150, EPI_ISL_9003159, EPI_ISL_9003167, EPI_ISL_9003168, EPI_ISL_9003412                                                                                                                                                                                                                                                                                                                                                                                                                                                                                                                                                                                                                                                                                                                                                                                                                                                                                                                                                       | UNILABS                                                                                                                          | Instituto Nacional de Saude (INSA)                                                                                                                                                                                 | Borges et al                                                                                                                                                                                                                                                                                                                                                                 |
| EPI_ISL_9752644, EPI_ISL_9752645, EPI_ISL_9752646, EPI_ISL_9763320                                                                                                                                                                                                                                                                                                                                                                                                                                                                                                                                                                                                                                                                                                                                                                                                                                                                                                                                                                                                                           | US Air Force School of Aerospace Medicine                                                                                        | US Air Force School of Aerospace Medicine                                                                                                                                                                          | Anthony Fries; Carol Garrett; Clarise Starr; Deanna Muehleman; Elizabeth Macias; Jennifer Meyer; Kelsey Lanter; Sarah Purves; William Gruner                                                                                                                                                                                                                                 |
| EPI_ISL_9433300, EPI_ISL_9433323                                                                                                                                                                                                                                                                                                                                                                                                                                                                                                                                                                                                                                                                                                                                                                                                                                                                                                                                                                                                                                                             | UW Virology Lab                                                                                                                  | UW Virology Lab                                                                                                                                                                                                    | Alexander Greninger; Hong Xie; Isabel Arnold; Keith R Jerome; Meei-Li Huang; Nathan Breit; Patrick Mathias; Pavitra Roychoudhury; Pooneh Hajian; Ricardo Perez; Robert J. Livingston; Sean Ellis; Seffir T. Wendm; Shah Mohamed Bakhsh                                                                                                                                       |
| EPI_ISL_9459393                                                                                                                                                                                                                                                                                                                                                                                                                                                                                                                                                                                                                                                                                                                                                                                                                                                                                                                                                                                                                                                                              | Uniklinikum Regensburg; Institut für klinische Mikrobiologie und Hygiene                                                         | Robert Koch Institute                                                                                                                                                                                              |                                                                                                                                                                                                                                                                                                                                                                              |
| EPI_ISL_9506881, EPI_ISL_9626353, EPI_ISL_9649946                                                                                                                                                                                                                                                                                                                                                                                                                                                                                                                                                                                                                                                                                                                                                                                                                                                                                                                                                                                                                                            | Unilabs Laboratory Medicine                                                                                                      | Norwegian Institute of Public Health, Department of Virology                                                                                                                                                       | Atya R Ali; Debec Nadia; Engebretsen Serina Beate; Garcia Llorente Ignacio; Hilde Elshaug; Hilde Nordby Falkenhaus; Hilde Vollan; Jon Bråte; Kamilla Heddeland Instefjord; Karoline Bragstad; Kathrine Stene-Johansen; Line Victoria Moen; Marie Paulsen Madsen; Olav Hungnes; Pedersen Benedikte Nevjen; Rasmus Riis Kopperud                                               |
| EPI_ISL_9264830, EPI_ISL_9264837, EPI_ISL_9264948, EPI_ISL_9265032, EPI_ISL_9286131, EPI_ISL_9286350, EPI_ISL_9812611                                                                                                                                                                                                                                                                                                                                                                                                                                                                                                                                                                                                                                                                                                                                                                                                                                                                                                                                                                        | University College London, Great Ormond Street Hospital for Children NHS Foundation Trust, Imperial College Healthcare NHS Trust | COVID-19 Genomics UK (COG-UK) Consortium                                                                                                                                                                           | Charlotte Williams; Helena Tutill; Judith Breuer; Marius Cotic; Mark Kristiansen; Nadua Bayzid; Patricia Dyal; Rachel Williams; Sergi Castellano; Sunando Roy                                                                                                                                                                                                                |
| EPI_ISL_9506899, EPI_ISL_9650124                                                                                                                                                                                                                                                                                                                                                                                                                                                                                                                                                                                                                                                                                                                                                                                                                                                                                                                                                                                                                                                             | University Hospital of Northern Norway, Department for Microbiology and Infectious Disease Control                               | Norwegian Institute of Public Health, Department of Virology                                                                                                                                                       | Atya R Ali; Debec Nadia; Engebretsen Serina Beate; Garcia Llorente Ignacio; Hilde Elshaug; Hilde Nordby Falkenhaus; Hilde Vollan; Jon Bråte; Kamilla Heddeland Instefjord; Karoline Bragstad; Kathrine Stene-Johansen; Line Victoria Moen; Marie Paulsen Madsen; Olav Hungnes; Pedersen Benedikte Nevjen; Rasmus Riis Kopperud                                               |
| EPI_ISL_9676649, EPI_ISL_9695921, EPI_ISL_9703531, EPI_ISL_9703532                                                                                                                                                                                                                                                                                                                                                                                                                                                                                                                                                                                                                                                                                                                                                                                                                                                                                                                                                                                                                           | University of Michigan Clinical Microbiology Laboratory                                                                          | Lauring Lab, University of Michigan, Department of Microbiology and Immunology                                                                                                                                     | Gilbert                                                                                                                                                                                                                                                                                                                                                                      |
| EPI_ISL_9686879, EPI_ISL_9686880, EPI_ISL_9686882, EPI_ISL_9686883, EPI_ISL_9686884, EPI_ISL_9686885, EPI_ISL_9686886, EPI_ISL_9686887, EPI_ISL_9686889, EPI_ISL_9686890, EPI_ISL_9686891                                                                                                                                                                                                                                                                                                                                                                                                                                                                                                                                                                                                                                                                                                                                                                                                                                                                                                    | University of Pretoria                                                                                                           | CERI, Centre for Epidemic Response and Innovation, Stellenbosch University and KRISP, KZN Research Innovation and Sequencing Platform, UKZN.                                                                       | Adriano Mendes; Amy Strydom; Anyaneji UJ; Giandhari J; Maharaj A; Micheala Davids; Moir M; Naicker D; Naidoo V; Pillay S; San JE; Sim Mayaphi and Marietjie Venter; Tegally H; Tshiabula D; Van Wyk S; Wilkinson E; de Oliveira T                                                                                                                                            |
| EPI_ISL_9107010, EPI_ISL_9107011, EPI_ISL_9107013, EPI_ISL_9107014                                                                                                                                                                                                                                                                                                                                                                                                                                                                                                                                                                                                                                                                                                                                                                                                                                                                                                                                                                                                                           | Universitätsklinikum Frankfurt - Institut für Medizinische Virologie                                                             | Robert Koch Institute                                                                                                                                                                                              |                                                                                                                                                                                                                                                                                                                                                                              |

|                                                                                                                       |                                                                                                                         |                                                                                                                                                                                                                    |                                                                                                                                                                                                                                                                                                                                                                                                                                                                                                                                                                                                                                                                                                                                 |
|-----------------------------------------------------------------------------------------------------------------------|-------------------------------------------------------------------------------------------------------------------------|--------------------------------------------------------------------------------------------------------------------------------------------------------------------------------------------------------------------|---------------------------------------------------------------------------------------------------------------------------------------------------------------------------------------------------------------------------------------------------------------------------------------------------------------------------------------------------------------------------------------------------------------------------------------------------------------------------------------------------------------------------------------------------------------------------------------------------------------------------------------------------------------------------------------------------------------------------------|
| EPI_ISL_9211910                                                                                                       | Universitätsklinikum Hamburg-Eppendorf / Institut für Medizinische Mikrobiologie Virologie und Hygiene                  | Robert Koch Institute                                                                                                                                                                                              |                                                                                                                                                                                                                                                                                                                                                                                                                                                                                                                                                                                                                                                                                                                                 |
| EPI_ISL_9456182, EPI_ISL_9456201, EPI_ISL_9456215, EPI_ISL_9456221, EPI_ISL_9456225, EPI_ISL_9456255                  | Universitätsklinikum Ulm - Institut für Virologie                                                                       | Robert Koch Institute                                                                                                                                                                                              |                                                                                                                                                                                                                                                                                                                                                                                                                                                                                                                                                                                                                                                                                                                                 |
| EPI_ISL_9376212                                                                                                       | Uniwersyteckie Centrum Kliniczne                                                                                        | 1. Tricity SARS-CoV-2 sequencing consortium: University of Gdansk, Medical University of Gdansk, Vaxican Ltd., Invicta Ltd. 2. National Institute of Public Health - National Institute of Hygiene, Warsaw, Poland | Celina Cybulska; Karolina Gackowska; Katarzyna Groth; Katarzyna Zacharczuk; Krystyna Bienkowska Szewczyk; Lukasz Rabalski; Maciej Grzybek; Maciej Kosinski; Magdalena Nowakowska; Marcin Lubocki; Małgorzata Sadkowska-Todys; Tomasz Wołkowicz                                                                                                                                                                                                                                                                                                                                                                                                                                                                                  |
| EPI_ISL_9202420                                                                                                       | Uniwersytet Medyczny im. Karola Marcinkowskiego w Poznaniu                                                              | 1. Academic Center for Pathomorphological and Genetic-Molecular Diagnostics Ltd, Białystok, Poland 2. National Institute of Public Health - National Institute of Hygiene, Warsaw, Poland                          | Anetta Sulewska; Jacek Nikliński; Janusz Dzieciół; Joanna Kiśluk; Katarzyna Zacharczuk; Konrad Raczkowski; Magdalena Nowakowska; Małgorzata Sadkowska-Todys; Piotr Karabowicz; Piotr Majewski; Przemysław Bieчек. Joanna Reszczę; Radosław Charkiewicz; Tomasz Wołkowicz                                                                                                                                                                                                                                                                                                                                                                                                                                                        |
| EPI_ISL_8952413, EPI_ISL_9104413, EPI_ISL_9104988                                                                     | Utah Public Health Laboratory                                                                                           | Utah Public Health Laboratory                                                                                                                                                                                      | Erin L. Young; John Arnn; Kelly F. Oakeson; Olinto Linares-Perdomo; Pooja Gupta; Tom Iverson                                                                                                                                                                                                                                                                                                                                                                                                                                                                                                                                                                                                                                    |
| EPI_ISL_9679648, EPI_ISL_9679655, EPI_ISL_9679656                                                                     | VERMAAK                                                                                                                 | National Institute for Communicable Diseases of the National Health Laboratory Service                                                                                                                             | Amoako DG; Bhiman JN; Everatt J; Ismail A; Kekana D; Mahlangu B; Mnguni A; Mohale T; Ntuli N; Scheepers C; Wolter N                                                                                                                                                                                                                                                                                                                                                                                                                                                                                                                                                                                                             |
| EPI_ISL_9392373, EPI_ISL_9392388, EPI_ISL_9392395, EPI_ISL_9392397, EPI_ISL_9392399                                   | VITALABO Laboratoria Medyczne Sp. z o.o.                                                                                | 1. Tricity SARS-CoV-2 sequencing consortium: University of Gdansk, Medical University of Gdansk, Vaxican Ltd., Invicta Ltd. 2. National Institute of Public Health - National Institute of Hygiene, Warsaw, Poland | Celina Cybulska; Karolina Gackowska; Katarzyna Groth; Katarzyna Zacharczuk; Krystyna Bienkowska Szewczyk; Lukasz Rabalski; Maciej Grzybek; Maciej Kosinski; Magdalena Nowakowska; Marcin Lubocki; Małgorzata Sadkowska-Todys; Tomasz Wołkowicz                                                                                                                                                                                                                                                                                                                                                                                                                                                                                  |
| EPI_ISL_9060764, EPI_ISL_9061267, EPI_ISL_9061298, EPI_ISL_9770860                                                    | Viollier AG                                                                                                             | Department of Biosystems Science and Engineering, ETH Zürich                                                                                                                                                       | Andrea Patrignani; Andrea Patrizia Salzmann; Andreia Cabral de Gouvea; Catharine Aquino Fournier; Chaoran Chen; Christian Beisel; Christian Urban; Christiane Beckmann; Christoph Noppen; Daniel Ehrensam; David Dreifuss; Doris Popovici; Elodie Burcklen; Franziska Singer; Griffin White; Hai Bui; Henriette Kurth; Ina Nissen; Isabel Stürmer; Ivan Topolsky; Jay Tracy; Kim Philipp Jablonski; Lara Fuhrmann; Laura Neff; Lennart Opitz; Louis du Plessis; Maria Domenica Moccia; Matteo Carrara; Maurice Redondo; Mirjam Feldkamp; Natascha Santacroce; Niko Beerenwinkel; Olivier Kobel; Pelin Icer; Ralph Schlapbach; Rebecca Denes; Sarah Nadeau; Shuqing Yu; Simon Grüter; Tanja Stadler; Timothy Sykes; Tobias Schär |
| EPI_ISL_9586333                                                                                                       | Virology Department, Royal Infirmary of Edinburgh, NHS Lothian / School of Biological Sciences, University of Edinburgh | COVID-19 Genomics UK (COG-UK) Consortium                                                                                                                                                                           | Colquhoun R; Cotton S; Dewar R; Fernandez G; Gallagher A; Hill V; Jackson B; Maloney D; McCrone JT; McHugh M; O'Toole Á; Rambaut A; Scher E; Templeton K; Yu X                                                                                                                                                                                                                                                                                                                                                                                                                                                                                                                                                                  |
| EPI_ISL_9588350, EPI_ISL_9588351, EPI_ISL_9588356, EPI_ISL_9588357, EPI_ISL_9588359, EPI_ISL_9588363, EPI_ISL_9588371 | see above                                                                                                               |                                                                                                                                                                                                                    |                                                                                                                                                                                                                                                                                                                                                                                                                                                                                                                                                                                                                                                                                                                                 |
|                                                                                                                       | Virology Laboratory, International Centre for Diarrhoeal Disease Research, Bangladesh (ICDDR,B)                         | Virology Laboratory, International Centre for Diarrhoeal Disease Research, Bangladesh (ICDDR,B)                                                                                                                    | ASM Alamgir; Ahmed Nawsher Alam; Dinesh Mondal; Firdausi Qadri; Hassan Afrad; Mahbubur Rahman; Manjur Hossain Khan; Md. Mahfuzur Rahman; Mohammad Enayet Hossain; Mohammad Jubair; Mohammad Shahidul Islam; Mohammed Ziaur Rahman; Mojnu Miah; Mustafizur Rahman; Rashedul Hasan; Razib Mazumder; Samir Kumar Saha; Senjuti Saha; Tahmina Shirin                                                                                                                                                                                                                                                                                                                                                                                |
| EPI_ISL_9102388, EPI_ISL_9102756                                                                                      | Virology Laboratory, NAPH, Moldova                                                                                      | Virology Laboratory, NAPH, Moldova                                                                                                                                                                                 | Apostol Mariana; Cataraga Alina; Colac Svetlana                                                                                                                                                                                                                                                                                                                                                                                                                                                                                                                                                                                                                                                                                 |
| EPI_ISL_8841191, EPI_ISL_8841193, EPI_ISL_8841227, EPI_ISL_8841228, EPI_ISL_8841237                                   | Virology Unit, Institut Pasteur du Cambodge                                                                             | Virology Unit, Institut Pasteur du Cambodge                                                                                                                                                                        | Cecile Troupin; Chau Darapheak; Chin Savuth; Erik A Karlsson; Jurre Y Siegers; Kraing Sidonn; Leakhena Pum; Ly Sovann; Sophoannedth Rath; Veasna Duong; Yi Sengdoeurn                                                                                                                                                                                                                                                                                                                                                                                                                                                                                                                                                           |
| EPI_ISL_8981707, EPI_ISL_9191455                                                                                      | Virology, Universitätsklinikum des Saarlandes                                                                           | Epigenetics, Saarland University                                                                                                                                                                                   | Barbara Berko-Göttel Sascha Tierling; Jörn Walter; Kathrin Kattler; Nastasia Seiwert; Sigrun Smola; Thorsten Pfuhl                                                                                                                                                                                                                                                                                                                                                                                                                                                                                                                                                                                                              |
| EPI_ISL_9573248, EPI_ISL_8985425                                                                                      | Vredenburg Clinic wc VBC<br>WSSE Katowice                                                                               | NHLS/UCT<br>Wojewódzka Stacja Sanitarno-Epidemiologiczna w Katowicach                                                                                                                                              | Arash Iranzadeh; Bruna Galvao; Carolyn Williamson; Deelan Doolabh; Diana Hardie; Gert Marais; Innocent Mudau; Luicer Olubayo; Lynn Tyers; Marvin Hsiao; Nokuzola Mbhele; Rageema Joseph; Stephen Korsman<br>Adrian Miara; Agata Chajda; Beata Rozwadowska; Elżbieta Bartkowiak; Marta Alberyńska                                                                                                                                                                                                                                                                                                                                                                                                                                |
| EPI_ISL_9140636, EPI_ISL_9140671, EPI_ISL_9156680, EPI_ISL_9156710, EPI_ISL_9156714                                   | WSSE w Olsztynie                                                                                                        | Wojewódzka Stacja Sanitarno-Epidemiologiczna w Olsztynie, Laboratorium Badań Epidemiologiczno-Klinicznych                                                                                                          | Aleksandra Kobiatko; Barbara Dolinska; Emilia Tarabasz; Ewa Liszewska; Marta Lukian; Monika Czerminska; Patryk Bielecki; Paulina Rozycka; Sylwia Krzetowska; Tomasz Jakubczak                                                                                                                                                                                                                                                                                                                                                                                                                                                                                                                                                   |
| EPI_ISL_9163233                                                                                                       | Wojewodzki Specjalistyczny Szpital im. Dr. WI. Bieganskiego                                                             | Wojewódzka Stacja Sanitarno-Epidemiologiczna w Łodzi, Oddział Laboratorijny Mikrobiologii i Parazytologii                                                                                                          | Agnieszka Karnowska; Aleksandra Krawczyk; Danuta Bartczak; Elian Terpo; Katarzyna Kosowska; Lucyna Kochanowska; Marta Gawronska; Martyna Matera; Szymon Konkolewski                                                                                                                                                                                                                                                                                                                                                                                                                                                                                                                                                             |
| EPI_ISL_9352713                                                                                                       | Zakład Diagnostyki Laboratoryjnej Koagulologii i Mikrobiologii                                                          | Wojewódzka Stacja Sanitarno-Epidemiologiczna w Rzeszowie, Laboratorium Diagnostyki Medycznej                                                                                                                       | Anna Nowakowska; Karolina Ostrowska; Katarzyna Wilk; Marzena Baranowska                                                                                                                                                                                                                                                                                                                                                                                                                                                                                                                                                                                                                                                         |
| EPI_ISL_9267431, EPI_ISL_9267511, EPI_ISL_9267540                                                                     | Zakład Diagnostyki Laboratoryjnej Międzylaski Szpital Specjalistyczny                                                   | 1. Tricity SARS-CoV-2 sequencing consortium: University of Gdansk, Medical University of Gdansk, Vaxican Ltd., Invicta Ltd. 2. National Institute of Public Health - National Institute of Hygiene, Warsaw, Poland | Celina Cybulska; Karolina Gackowska; Katarzyna Groth; Katarzyna Zacharczuk; Krystyna Bienkowska Szewczyk; Lukasz Rabalski; Maciej Grzybek; Maciej Kosinski; Magdalena Nowakowska; Marcin Lubocki; Małgorzata Sadkowska-Todys; Tomasz Wołkowicz                                                                                                                                                                                                                                                                                                                                                                                                                                                                                  |
| EPI_ISL_9457890                                                                                                       | Zakład Patologii Nowotworów i Patomorfologii Centrum Onkologii im. prof. F. Łukaszczyka w Bydgoszczy                    | 1. Tricity SARS-CoV-2 sequencing consortium: University of Gdansk, Medical University of Gdansk, Vaxican Ltd., Invicta Ltd. 2. National Institute of Public Health - National Institute of Hygiene, Warsaw, Poland | Celina Cybulska; Karolina Gackowska; Katarzyna Groth; Katarzyna Zacharczuk; Krystyna Bienkowska Szewczyk; Lukasz Rabalski; Maciej Grzybek; Maciej Kosinski; Magdalena Nowakowska; Marcin Lubocki; Małgorzata Sadkowska-Todys; Tomasz Wołkowicz                                                                                                                                                                                                                                                                                                                                                                                                                                                                                  |
| EPI_ISL_9225316, EPI_ISL_9214270, EPI_ISL_9214280                                                                     | amedes MVZ DIAMEDIS Sennestadt<br>amedes MVZ Hannover                                                                   | Robert Koch Institute<br>Robert Koch Institute                                                                                                                                                                     |                                                                                                                                                                                                                                                                                                                                                                                                                                                                                                                                                                                                                                                                                                                                 |
| EPI_ISL_9219089, EPI_ISL_9225268, EPI_ISL_9225281                                                                     | labopart - Medizinische Laboratorien Dresden<br>nordlab - Partnerschaftspraxis für Laboratoriumsmedizin                 | Robert Koch Institute<br>Robert Koch Institute                                                                                                                                                                     |                                                                                                                                                                                                                                                                                                                                                                                                                                                                                                                                                                                                                                                                                                                                 |

We gratefully acknowledge the following Authors from the Originating laboratories responsible for obtaining the specimens, as well as the Submitting laboratories where the genome data were generated and shared via GISAID, on which this research is based.

All Submitters of data may be contacted directly via [www.gisaid.org](http://www.gisaid.org)

Authors are sorted alphabetically.

| Accession ID                                                                                                                                                                                                                                                                                                                                                                                                                                                                                                                                                                                                                                                                                                                                                                                                                                                                                                                                                                                                                                                                                                                                                                                                                                                                                                                                                                                                                                                                                                                                                                                                                                                                                                                                                                                                                                                                                                                                                                                                                                                                                                                                                                                                                                                                                                                                                                                                                                                                                                                                                                                                                                                                                                                                                                                                                                                                                                                                                                                                                                                | Originating Laboratory                                                                   | Submitting Laboratory                                                                                                                      | Authors                                                                                                                                                                                                                                                                                                                                                                                                                                                                  |
|-------------------------------------------------------------------------------------------------------------------------------------------------------------------------------------------------------------------------------------------------------------------------------------------------------------------------------------------------------------------------------------------------------------------------------------------------------------------------------------------------------------------------------------------------------------------------------------------------------------------------------------------------------------------------------------------------------------------------------------------------------------------------------------------------------------------------------------------------------------------------------------------------------------------------------------------------------------------------------------------------------------------------------------------------------------------------------------------------------------------------------------------------------------------------------------------------------------------------------------------------------------------------------------------------------------------------------------------------------------------------------------------------------------------------------------------------------------------------------------------------------------------------------------------------------------------------------------------------------------------------------------------------------------------------------------------------------------------------------------------------------------------------------------------------------------------------------------------------------------------------------------------------------------------------------------------------------------------------------------------------------------------------------------------------------------------------------------------------------------------------------------------------------------------------------------------------------------------------------------------------------------------------------------------------------------------------------------------------------------------------------------------------------------------------------------------------------------------------------------------------------------------------------------------------------------------------------------------------------------------------------------------------------------------------------------------------------------------------------------------------------------------------------------------------------------------------------------------------------------------------------------------------------------------------------------------------------------------------------------------------------------------------------------------------------------|------------------------------------------------------------------------------------------|--------------------------------------------------------------------------------------------------------------------------------------------|--------------------------------------------------------------------------------------------------------------------------------------------------------------------------------------------------------------------------------------------------------------------------------------------------------------------------------------------------------------------------------------------------------------------------------------------------------------------------|
| EPI_ISL_9795622                                                                                                                                                                                                                                                                                                                                                                                                                                                                                                                                                                                                                                                                                                                                                                                                                                                                                                                                                                                                                                                                                                                                                                                                                                                                                                                                                                                                                                                                                                                                                                                                                                                                                                                                                                                                                                                                                                                                                                                                                                                                                                                                                                                                                                                                                                                                                                                                                                                                                                                                                                                                                                                                                                                                                                                                                                                                                                                                                                                                                                             | 24530 AU SERVICE ACCUEIL DES URGENCES                                                    | CNR Virus des Infections Respiratoires - France SUD                                                                                        | Antonin Bal; Bruno Lina; Bruno Simon; Gregory Destras; Gwendolyne Burfin; Hadrien Regue; Laurence Josset; Martine Valette; Quentin Semanas; Theophile Boyer                                                                                                                                                                                                                                                                                                              |
| EPI_ISL_9186382, EPI_ISL_9186384, EPI_ISL_9186385, EPI_ISL_9186412, EPI_ISL_9186447                                                                                                                                                                                                                                                                                                                                                                                                                                                                                                                                                                                                                                                                                                                                                                                                                                                                                                                                                                                                                                                                                                                                                                                                                                                                                                                                                                                                                                                                                                                                                                                                                                                                                                                                                                                                                                                                                                                                                                                                                                                                                                                                                                                                                                                                                                                                                                                                                                                                                                                                                                                                                                                                                                                                                                                                                                                                                                                                                                         | A. Krumbholz, Labor Dr. Krause und Kollegen MVZ GmbH, Kiel                               | Charité Universitätsmedizin Berlin, Institut für Virologie                                                                                 | Andi Krumbholz; Barbara Mühlemann; Christian Drosten; Julia Schneider; Julia Tesch; Jörn Beheim-Schwarzbach; Talitha Veith; Terry Jones; Tobias Bleicker; Victor M Corman                                                                                                                                                                                                                                                                                                |
| EPI_ISL_9111116                                                                                                                                                                                                                                                                                                                                                                                                                                                                                                                                                                                                                                                                                                                                                                                                                                                                                                                                                                                                                                                                                                                                                                                                                                                                                                                                                                                                                                                                                                                                                                                                                                                                                                                                                                                                                                                                                                                                                                                                                                                                                                                                                                                                                                                                                                                                                                                                                                                                                                                                                                                                                                                                                                                                                                                                                                                                                                                                                                                                                                             | A.S.L. ALESSANDRIA                                                                       | Fondazione del Piemonte per l'Oncologia IRCCS                                                                                              | Antonino Sottile; Giorgio Giardina; Paola Marino; Silvia Brossa                                                                                                                                                                                                                                                                                                                                                                                                          |
| EPI_ISL_9111925                                                                                                                                                                                                                                                                                                                                                                                                                                                                                                                                                                                                                                                                                                                                                                                                                                                                                                                                                                                                                                                                                                                                                                                                                                                                                                                                                                                                                                                                                                                                                                                                                                                                                                                                                                                                                                                                                                                                                                                                                                                                                                                                                                                                                                                                                                                                                                                                                                                                                                                                                                                                                                                                                                                                                                                                                                                                                                                                                                                                                                             | A.S.L. CUNEO 1                                                                           | Fondazione del Piemonte per l'Oncologia IRCCS                                                                                              | Antonino Sottile; Giorgio Giardina; Paola Marino; Silvia Brossa                                                                                                                                                                                                                                                                                                                                                                                                          |
| EPI_ISL_9456003, EPI_ISL_9456015, EPI_ISL_9456021                                                                                                                                                                                                                                                                                                                                                                                                                                                                                                                                                                                                                                                                                                                                                                                                                                                                                                                                                                                                                                                                                                                                                                                                                                                                                                                                                                                                                                                                                                                                                                                                                                                                                                                                                                                                                                                                                                                                                                                                                                                                                                                                                                                                                                                                                                                                                                                                                                                                                                                                                                                                                                                                                                                                                                                                                                                                                                                                                                                                           | A.S.L. NOVARA                                                                            | Fondazione del Piemonte per l'Oncologia IRCCS                                                                                              | Antonino Sottile; Giorgio Giardina; Paola Marino; Silvia Brossa                                                                                                                                                                                                                                                                                                                                                                                                          |
| EPI_ISL_9791884                                                                                                                                                                                                                                                                                                                                                                                                                                                                                                                                                                                                                                                                                                                                                                                                                                                                                                                                                                                                                                                                                                                                                                                                                                                                                                                                                                                                                                                                                                                                                                                                                                                                                                                                                                                                                                                                                                                                                                                                                                                                                                                                                                                                                                                                                                                                                                                                                                                                                                                                                                                                                                                                                                                                                                                                                                                                                                                                                                                                                                             | ARION GENETICA                                                                           | Instituto Nacional de Medicina Genomica                                                                                                    | Cedro-Tanda A; Escobar-Arrazola MA; Garnica-Lopez Dora; Herrera-Montalvo LA.; Hidalgo-Miranda A; Mendoza-Vargas A; Ramirez-Vega O; Rangel-DeLeon D; Reyes-Grajeda JP; Roldan-Castillo Magaly; Uribe-Figueroa Laura; Verea Jazmin; Yair Alfaro-Mora                                                                                                                                                                                                                       |
| EPI_ISL_9665345                                                                                                                                                                                                                                                                                                                                                                                                                                                                                                                                                                                                                                                                                                                                                                                                                                                                                                                                                                                                                                                                                                                                                                                                                                                                                                                                                                                                                                                                                                                                                                                                                                                                                                                                                                                                                                                                                                                                                                                                                                                                                                                                                                                                                                                                                                                                                                                                                                                                                                                                                                                                                                                                                                                                                                                                                                                                                                                                                                                                                                             | AZ Klina                                                                                 | AZ Klina                                                                                                                                   | Carl Vael; Lynsey Berckmans                                                                                                                                                                                                                                                                                                                                                                                                                                              |
| EPI_ISL_9670412                                                                                                                                                                                                                                                                                                                                                                                                                                                                                                                                                                                                                                                                                                                                                                                                                                                                                                                                                                                                                                                                                                                                                                                                                                                                                                                                                                                                                                                                                                                                                                                                                                                                                                                                                                                                                                                                                                                                                                                                                                                                                                                                                                                                                                                                                                                                                                                                                                                                                                                                                                                                                                                                                                                                                                                                                                                                                                                                                                                                                                             | AZ St-Jan Brugge-Oostende                                                                | AZ St-Jan Brugge-Oostende                                                                                                                  | Jorn Hellemans; Marie Madeleine Chabert-Consen; Marijke Reynders; Sofie Mahboob                                                                                                                                                                                                                                                                                                                                                                                          |
| EPI_ISL_9144021, EPI_ISL_9144023, EPI_ISL_9144033, EPI_ISL_9144034, EPI_ISL_9144035, EPI_ISL_9144036, EPI_ISL_9144037, EPI_ISL_9144038, EPI_ISL_9144039, EPI_ISL_9144082, EPI_ISL_9149060                                                                                                                                                                                                                                                                                                                                                                                                                                                                                                                                                                                                                                                                                                                                                                                                                                                                                                                                                                                                                                                                                                                                                                                                                                                                                                                                                                                                                                                                                                                                                                                                                                                                                                                                                                                                                                                                                                                                                                                                                                                                                                                                                                                                                                                                                                                                                                                                                                                                                                                                                                                                                                                                                                                                                                                                                                                                   |                                                                                          |                                                                                                                                            |                                                                                                                                                                                                                                                                                                                                                                                                                                                                          |
| see above                                                                                                                                                                                                                                                                                                                                                                                                                                                                                                                                                                                                                                                                                                                                                                                                                                                                                                                                                                                                                                                                                                                                                                                                                                                                                                                                                                                                                                                                                                                                                                                                                                                                                                                                                                                                                                                                                                                                                                                                                                                                                                                                                                                                                                                                                                                                                                                                                                                                                                                                                                                                                                                                                                                                                                                                                                                                                                                                                                                                                                                   | AZDelta                                                                                  | AZ Delta Medical Laboratories in Roeselare, Belgium                                                                                        | Dieter De Smet; Frederik Van Hoecke; Geert Martens; on behalf of AZ Delta COVID-19 Genomics core (member of Genomic surveillance of SARS-CoV-2 in Belgium network)                                                                                                                                                                                                                                                                                                       |
| EPI_ISL_9527860, EPI_ISL_9527861, EPI_ISL_9527897, EPI_ISL_9531905, EPI_ISL_9532268                                                                                                                                                                                                                                                                                                                                                                                                                                                                                                                                                                                                                                                                                                                                                                                                                                                                                                                                                                                                                                                                                                                                                                                                                                                                                                                                                                                                                                                                                                                                                                                                                                                                                                                                                                                                                                                                                                                                                                                                                                                                                                                                                                                                                                                                                                                                                                                                                                                                                                                                                                                                                                                                                                                                                                                                                                                                                                                                                                         | Aegis Sciences Corporation                                                               | Centers for Disease Control and Prevention Division of Viral Diseases, Pathogen Discovery                                                  | Alec Vest; Benjamin Rambo-Martin; Christopher Gulvick; Clinton Paden; Cyndi Clark; Dakota Howard; Dhwani Batra; Dillon Nall; Duncan MacCannell; Erisa Sula; Ethan Sanders; Holly Houdeshell; Jason Caravas; Kristine Lacey; Matthew Hardison; Matthew Schmerer; Ola Kvalvaag; Patrick Campbell; Peter Cook; Rob Case; Scott Sammons; Shatavia Morrison; Shaun Westlund; Tymecia Kendall; Victoria Caban Figueroa; Vikramsinha Ghorpade; Yvette Unoarumhi                 |
| EPI_ISL_9506884                                                                                                                                                                                                                                                                                                                                                                                                                                                                                                                                                                                                                                                                                                                                                                                                                                                                                                                                                                                                                                                                                                                                                                                                                                                                                                                                                                                                                                                                                                                                                                                                                                                                                                                                                                                                                                                                                                                                                                                                                                                                                                                                                                                                                                                                                                                                                                                                                                                                                                                                                                                                                                                                                                                                                                                                                                                                                                                                                                                                                                             | Akershus University Hospital, Department for Microbiology and Infectious Disease Control | Norwegian Institute of Public Health, Department of Virology                                                                               | Atiya R Ali; Debeck Nadia; Engebretsen Serina Beate; Garcia Lorente Ignacio; Hilde Elshaug; Hilde Nordby Falkenhaus; Hilde Vollan; Jon Bråte; Kamilla Heddeland Instefjord; Karoline Bragstad; Kathrine Stene-Johansen; Line Victoria Moen; Marie Paulsen Madsen; Olav Hungnes; Pedersen Benedikte Nevjen; Rasmus Riis Kopperud                                                                                                                                          |
| EPI_ISL_9072160, EPI_ISL_9072162, EPI_ISL_9072163, EPI_ISL_9072164, EPI_ISL_9072165, EPI_ISL_9072167, EPI_ISL_9570798, EPI_ISL_9570800, EPI_ISL_9570823, EPI_ISL_9570853                                                                                                                                                                                                                                                                                                                                                                                                                                                                                                                                                                                                                                                                                                                                                                                                                                                                                                                                                                                                                                                                                                                                                                                                                                                                                                                                                                                                                                                                                                                                                                                                                                                                                                                                                                                                                                                                                                                                                                                                                                                                                                                                                                                                                                                                                                                                                                                                                                                                                                                                                                                                                                                                                                                                                                                                                                                                                    |                                                                                          |                                                                                                                                            |                                                                                                                                                                                                                                                                                                                                                                                                                                                                          |
| see above                                                                                                                                                                                                                                                                                                                                                                                                                                                                                                                                                                                                                                                                                                                                                                                                                                                                                                                                                                                                                                                                                                                                                                                                                                                                                                                                                                                                                                                                                                                                                                                                                                                                                                                                                                                                                                                                                                                                                                                                                                                                                                                                                                                                                                                                                                                                                                                                                                                                                                                                                                                                                                                                                                                                                                                                                                                                                                                                                                                                                                                   | Allergy, Immunology and Cell Biology Unit (AICBU)                                        | Allergy, Immunology and Cell Biology Unit (AICBU)                                                                                          | Ayesha Wijesinghe; Chandima Jeewandara; Deshni Jayatilaka; Dinuka Ariyaratne; Diyanath Ranasinghe; Dummi Guasinghe; Farha Bary; Gathsauree Neelika Malavige; Heshan Kuruppu; Tibutus Thanesh                                                                                                                                                                                                                                                                             |
| EPI_ISL_8988952, EPI_ISL_8988956, EPI_ISL_8989059, EPI_ISL_8989178, EPI_ISL_9004780, EPI_ISL_9004818, EPI_ISL_9004867, EPI_ISL_9004888, EPI_ISL_9004901, EPI_ISL_9070058, EPI_ISL_9202020, EPI_ISL_9202034, EPI_ISL_9202082, EPI_ISL_9202140, EPI_ISL_9202147, EPI_ISL_9202152, EPI_ISL_9202168, EPI_ISL_9202172, EPI_ISL_9202175, EPI_ISL_9202181, EPI_ISL_9202215, EPI_ISL_9202226, EPI_ISL_9285735                                                                                                                                                                                                                                                                                                                                                                                                                                                                                                                                                                                                                                                                                                                                                                                                                                                                                                                                                                                                                                                                                                                                                                                                                                                                                                                                                                                                                                                                                                                                                                                                                                                                                                                                                                                                                                                                                                                                                                                                                                                                                                                                                                                                                                                                                                                                                                                                                                                                                                                                                                                                                                                       |                                                                                          |                                                                                                                                            |                                                                                                                                                                                                                                                                                                                                                                                                                                                                          |
| see above                                                                                                                                                                                                                                                                                                                                                                                                                                                                                                                                                                                                                                                                                                                                                                                                                                                                                                                                                                                                                                                                                                                                                                                                                                                                                                                                                                                                                                                                                                                                                                                                                                                                                                                                                                                                                                                                                                                                                                                                                                                                                                                                                                                                                                                                                                                                                                                                                                                                                                                                                                                                                                                                                                                                                                                                                                                                                                                                                                                                                                                   | Arizona State University                                                                 | Arizona State University                                                                                                                   | Efrem S. Lim; James C. Hu; Joshua LaBaer; LaRinda A. Holland; Matthew F. Smith; Nathaniel Johnson; Regan A. Sullins; Steven C. Holland; Vel Murugan                                                                                                                                                                                                                                                                                                                      |
| EPI_ISL_9626818, EPI_ISL_9626874, EPI_ISL_9627098, EPI_ISL_9627102                                                                                                                                                                                                                                                                                                                                                                                                                                                                                                                                                                                                                                                                                                                                                                                                                                                                                                                                                                                                                                                                                                                                                                                                                                                                                                                                                                                                                                                                                                                                                                                                                                                                                                                                                                                                                                                                                                                                                                                                                                                                                                                                                                                                                                                                                                                                                                                                                                                                                                                                                                                                                                                                                                                                                                                                                                                                                                                                                                                          | Austrian Agency for Health and Food Safety (AGES)                                        | Bergthaler Laboratory, CeMM Research Center for Molecular Medicine of the Austrian Academy of Sciences                                     | Andreas Bergthaler; Anna Schedl; Bekir Ergun; Benedikt Agerer; Christoph Bock; Fabian Amman; Jan Laine; Lukas Endler; Martin Senekowitsch; Matthew Thornton; Michael Schuster; Michelle Chan; Petr Triska; Thomas Penz                                                                                                                                                                                                                                                   |
| EPI_ISL_9329635, EPI_ISL_9329636, EPI_ISL_9329637, EPI_ISL_9329638, EPI_ISL_9329639, EPI_ISL_9329640, EPI_ISL_9329651, EPI_ISL_9329654, EPI_ISL_9329667, EPI_ISL_9329669, EPI_ISL_9329670, EPI_ISL_9329671, EPI_ISL_9329672, EPI_ISL_9329673, EPI_ISL_9329675, EPI_ISL_9329676, EPI_ISL_9329679, EPI_ISL_9329693, EPI_ISL_9329694, EPI_ISL_9329695, EPI_ISL_9329698, EPI_ISL_9329726, EPI_ISL_9329727, EPI_ISL_9329728, EPI_ISL_9329730, EPI_ISL_9329733, EPI_ISL_9329734, EPI_ISL_9329735, EPI_ISL_9329736, EPI_ISL_9329737, EPI_ISL_9329738, EPI_ISL_9329739, EPI_ISL_9329740, EPI_ISL_9329741, EPI_ISL_9329742, EPI_ISL_9329743, EPI_ISL_9329744, EPI_ISL_9329745, EPI_ISL_9329746, EPI_ISL_9329747, EPI_ISL_9329748, EPI_ISL_9329749, EPI_ISL_9329750, EPI_ISL_9329751, EPI_ISL_9329752, EPI_ISL_9329753, EPI_ISL_9329754, EPI_ISL_9329755, EPI_ISL_9329756, EPI_ISL_9329757, EPI_ISL_9329758, EPI_ISL_9329759, EPI_ISL_9329760, EPI_ISL_9329761, EPI_ISL_9329762, EPI_ISL_9329763, EPI_ISL_9329764, EPI_ISL_9329765, EPI_ISL_9329766, EPI_ISL_9329767, EPI_ISL_9329768, EPI_ISL_9329769, EPI_ISL_9329770, EPI_ISL_9329771, EPI_ISL_9329772, EPI_ISL_9329773, EPI_ISL_9329774, EPI_ISL_9329775, EPI_ISL_9329776, EPI_ISL_9329777, EPI_ISL_9329778, EPI_ISL_9329779, EPI_ISL_9329780, EPI_ISL_9329781, EPI_ISL_9329782, EPI_ISL_9329783, EPI_ISL_9329784, EPI_ISL_9329785, EPI_ISL_9329786, EPI_ISL_9329787, EPI_ISL_9329788, EPI_ISL_9329789, EPI_ISL_9329790, EPI_ISL_9329791, EPI_ISL_9329792, EPI_ISL_9329793, EPI_ISL_9329794, EPI_ISL_9329795, EPI_ISL_9329796, EPI_ISL_9329797, EPI_ISL_9329798, EPI_ISL_9329799, EPI_ISL_9329800, EPI_ISL_9329801, EPI_ISL_9329802, EPI_ISL_9329803, EPI_ISL_9329804, EPI_ISL_9329805, EPI_ISL_9329806, EPI_ISL_9329807, EPI_ISL_9329808, EPI_ISL_9329809, EPI_ISL_9329810, EPI_ISL_9329811, EPI_ISL_9329812, EPI_ISL_9329813, EPI_ISL_9329814, EPI_ISL_9329815, EPI_ISL_9329816, EPI_ISL_9329817, EPI_ISL_9329818, EPI_ISL_9329819, EPI_ISL_9329820, EPI_ISL_9329821, EPI_ISL_9329822, EPI_ISL_9329823, EPI_ISL_9329824, EPI_ISL_9329825, EPI_ISL_9329826, EPI_ISL_9329827, EPI_ISL_9329828, EPI_ISL_9329829, EPI_ISL_9329830, EPI_ISL_9329831, EPI_ISL_9329832, EPI_ISL_9329833, EPI_ISL_9329834, EPI_ISL_9329835, EPI_ISL_9329836, EPI_ISL_9329837, EPI_ISL_9329838, EPI_ISL_9329839, EPI_ISL_9329840, EPI_ISL_9329841, EPI_ISL_9329842, EPI_ISL_9329843, EPI_ISL_9329844, EPI_ISL_9329845, EPI_ISL_9329846, EPI_ISL_9329847, EPI_ISL_9329848, EPI_ISL_9329849, EPI_ISL_9329850, EPI_ISL_9329851, EPI_ISL_9329852, EPI_ISL_9329853, EPI_ISL_9329854, EPI_ISL_9329855, EPI_ISL_9329856, EPI_ISL_9329857, EPI_ISL_9329858, EPI_ISL_9329859, EPI_ISL_9329860, EPI_ISL_9329861, EPI_ISL_9329862, EPI_ISL_9329863, EPI_ISL_9329864, EPI_ISL_9329865, EPI_ISL_9329866, EPI_ISL_9329867, EPI_ISL_9329868, EPI_ISL_9329869, EPI_ISL_9329870, EPI_ISL_9329871, EPI_ISL_9329872, EPI_ISL_9329873, EPI_ISL_9329874, EPI_ISL_9329875, EPI_ISL_9329876, EPI_ISL_9329877, EPI_ISL_9329878, EPI_ISL_9329879, EPI_ISL_9329880 |                                                                                          |                                                                                                                                            |                                                                                                                                                                                                                                                                                                                                                                                                                                                                          |
| see above                                                                                                                                                                                                                                                                                                                                                                                                                                                                                                                                                                                                                                                                                                                                                                                                                                                                                                                                                                                                                                                                                                                                                                                                                                                                                                                                                                                                                                                                                                                                                                                                                                                                                                                                                                                                                                                                                                                                                                                                                                                                                                                                                                                                                                                                                                                                                                                                                                                                                                                                                                                                                                                                                                                                                                                                                                                                                                                                                                                                                                                   | BANGALORE BAPTIST HOSPITAL                                                               | National Center for Biological Sciences, TIFR - Rockefeller Foundation                                                                     | Awadhesh Pandit; Bhagyashree Madhav Shelar; Darshan Sreenivas; Dimple Notani; Kathirvel Kandasamy; Lakshminarayanan CP; Satyajit Mayor; Uma Ramakrishnan                                                                                                                                                                                                                                                                                                                 |
| EPI_ISL_9322111, EPI_ISL_9352673                                                                                                                                                                                                                                                                                                                                                                                                                                                                                                                                                                                                                                                                                                                                                                                                                                                                                                                                                                                                                                                                                                                                                                                                                                                                                                                                                                                                                                                                                                                                                                                                                                                                                                                                                                                                                                                                                                                                                                                                                                                                                                                                                                                                                                                                                                                                                                                                                                                                                                                                                                                                                                                                                                                                                                                                                                                                                                                                                                                                                            | BIOMNIS LYON                                                                             | CNR Virus des Infections Respiratoires - France SUD                                                                                        | Antonin Bal; Bruno Lina; Bruno Simon; Gregory Destras; Gwendolyne Burfin; Hadrien Regue; Laurence Josset; Martine Valette; Quentin Semanas; ThÃ©ophile Boyer; Th ophile Boyer                                                                                                                                                                                                                                                                                            |
| EPI_ISL_9236190, EPI_ISL_9236194, EPI_ISL_9236259, EPI_ISL_9696296, EPI_ISL_9696297                                                                                                                                                                                                                                                                                                                                                                                                                                                                                                                                                                                                                                                                                                                                                                                                                                                                                                                                                                                                                                                                                                                                                                                                                                                                                                                                                                                                                                                                                                                                                                                                                                                                                                                                                                                                                                                                                                                                                                                                                                                                                                                                                                                                                                                                                                                                                                                                                                                                                                                                                                                                                                                                                                                                                                                                                                                                                                                                                                         | BJ Medical College, Ahmedabad                                                            | Gujarat Biotechnology Research Centre                                                                                                      | Akhlesh Modi; Apurvashin Puvare; Bhadrshreshni Gohil; Chaitanya Joshi; Disha Vora; Janvi Raval; Jaykumar Rangani; Madhvi Joshi; Nimesh Patel; Nitin Savaliya; NitinShukla; Priyank Chavda; Ramesh Pandit; Roshani Mishra; Sonal Sharma; Sumita Soni; Tasmin Trivedi; Zarna Patel                                                                                                                                                                                         |
| EPI_ISL_9518230, EPI_ISL_9518267                                                                                                                                                                                                                                                                                                                                                                                                                                                                                                                                                                                                                                                                                                                                                                                                                                                                                                                                                                                                                                                                                                                                                                                                                                                                                                                                                                                                                                                                                                                                                                                                                                                                                                                                                                                                                                                                                                                                                                                                                                                                                                                                                                                                                                                                                                                                                                                                                                                                                                                                                                                                                                                                                                                                                                                                                                                                                                                                                                                                                            | BROUSSAIS                                                                                | Department of Virology, Henri Mondor University Hospital, Assistance Publique H pitaux de Paris, Universit  Paris-Est Cr teil, INSERM U955 | Alexandre Soulier; Christophe Rodriguez; Elisabeth Trawinski; Guillaume Gircourt; Jean-Michel Pawlitsky; Melissa N'Debi; Slim Fourati; Vanessa Demontant                                                                                                                                                                                                                                                                                                                 |
| EPI_ISL_9467871, EPI_ISL_9467872, EPI_ISL_9467873, EPI_ISL_9467874, EPI_ISL_9467875                                                                                                                                                                                                                                                                                                                                                                                                                                                                                                                                                                                                                                                                                                                                                                                                                                                                                                                                                                                                                                                                                                                                                                                                                                                                                                                                                                                                                                                                                                                                                                                                                                                                                                                                                                                                                                                                                                                                                                                                                                                                                                                                                                                                                                                                                                                                                                                                                                                                                                                                                                                                                                                                                                                                                                                                                                                                                                                                                                         | BTKLPP Kelas 1 Medan                                                                     | National Institute of Health Research and Development                                                                                      | Arie Ardiansyah Nugraha; Fajar Nur Sulistiyohadi; Hana Apsari Pawestri; Hartanti Dian Ikawati; Kartika Dewi Puspa; Nelly Puspandari; Nur Ika Hariastuti; Puri Widia; Subangkit; Vivi Setiawaty                                                                                                                                                                                                                                                                           |
| EPI_ISL_9775163                                                                                                                                                                                                                                                                                                                                                                                                                                                                                                                                                                                                                                                                                                                                                                                                                                                                                                                                                                                                                                                                                                                                                                                                                                                                                                                                                                                                                                                                                                                                                                                                                                                                                                                                                                                                                                                                                                                                                                                                                                                                                                                                                                                                                                                                                                                                                                                                                                                                                                                                                                                                                                                                                                                                                                                                                                                                                                                                                                                                                                             | Basurto University Hospital: Clinical Microbiology Laboratory                            | Basurto University Hospital: Clinical Microbiology Laboratory                                                                              | Estibaliz Ugaldel Zarraga; Jos  Luis D az de Tuesta del Arco; Mikel Urrutikoetxea-Guti rrez; M  Carmen Nieto Toboso                                                                                                                                                                                                                                                                                                                                                      |
| EPI_ISL_9648052, EPI_ISL_9648226, EPI_ISL_9648227, EPI_ISL_9648228                                                                                                                                                                                                                                                                                                                                                                                                                                                                                                                                                                                                                                                                                                                                                                                                                                                                                                                                                                                                                                                                                                                                                                                                                                                                                                                                                                                                                                                                                                                                                                                                                                                                                                                                                                                                                                                                                                                                                                                                                                                                                                                                                                                                                                                                                                                                                                                                                                                                                                                                                                                                                                                                                                                                                                                                                                                                                                                                                                                          | Bayerisches Landesamt fuer Gesundheit und Lebensmittelsicherheit (LGL)                   | Bayerisches Landesamt fuer Gesundheit und Lebensmittelsicherheit (LGL)                                                                     | Alexandra Dangel; Andreas Sing; Annika Sprenger; Carola Berger; Laura Weise; Nikolaus Ackermann; Sabrina Hepner                                                                                                                                                                                                                                                                                                                                                          |
| EPI_ISL_8993641, EPI_ISL_8993764, EPI_ISL_8994179, EPI_ISL_8994261, EPI_ISL_8994296, EPI_ISL_8994315, EPI_ISL_8994319, EPI_ISL_8994320, EPI_ISL_8994337, EPI_ISL_8994339, EPI_ISL_8994341, EPI_ISL_8994357, EPI_ISL_8994358, EPI_ISL_8994371, EPI_ISL_8994381, EPI_ISL_8994382, EPI_ISL_8994384, EPI_ISL_8994391, EPI_ISL_8994398, EPI_ISL_8994421, EPI_ISL_8994423, EPI_ISL_8994435, EPI_ISL_8994470, EPI_ISL_8994473, EPI_ISL_8994481, EPI_ISL_8994515, EPI_ISL_8994516, EPI_ISL_8994571, EPI_ISL_9000287, EPI_ISL_9000291, EPI_ISL_9000422, EPI_ISL_9000615, EPI_ISL_9000670, EPI_ISL_90024795, EPI_ISL_90024796, EPI_ISL_90024856, EPI_ISL_90024899, EPI_ISL_90025121, EPI_ISL_9003210, EPI_ISL_9003220, EPI_ISL_9003755, EPI_ISL_9003768, EPI_ISL_9003786, EPI_ISL_9003902, EPI_ISL_90063983, EPI_ISL_90063997, EPI_ISL_90064030, EPI_ISL_90064043, EPI_ISL_90064068, EPI_ISL_90064175, EPI_ISL_90064151, EPI_ISL_90064175, EPI_ISL_90064348, EPI_ISL_90064399, EPI_ISL_90065380, EPI_ISL_90065420, EPI_ISL_90065651, EPI_ISL_90065673, EPI_ISL_90065783, EPI_ISL_90065885, EPI_ISL_90065911, EPI_ISL_90065930, EPI_ISL_90067431, EPI_ISL_90067594, EPI_ISL_90067623, EPI_ISL_90067698, EPI_ISL_90067837, EPI_ISL_90074510, EPI_ISL_90074510, EPI_ISL_90074574, EPI_ISL_90074802, EPI_ISL_90074845, EPI_ISL_90075801, EPI_ISL_90075808, EPI_ISL_90075831, EPI_ISL_90076210, EPI_ISL_90076264, EPI_ISL_90076300, EPI_ISL_90076305, EPI_ISL_90076446, EPI_ISL_90076625, EPI_ISL_90076650, EPI_ISL_90076654, EPI_ISL_90076676, EPI_ISL_90076686, EPI_ISL_90076774, EPI_ISL_90077213, EPI_ISL_90077266, EPI_ISL_91112005, EPI_ISL_91112126, EPI_ISL_9114738, EPI_ISL_9114964, EPI_ISL_9115057, EPI_ISL_9124193, EPI_ISL_9124424, EPI_ISL_9124486, EPI_ISL_9124521, EPI_ISL_9124555, EPI_ISL_9126253, EPI_ISL_9126990, EPI_ISL_9128232, EPI_ISL_9128281, EPI_ISL_9128025, EPI_ISL_9129138, EPI_ISL_9130134, EPI_ISL_9130135, EPI_ISL_9130154, EPI_ISL_9130218, EPI_ISL_9130232, EPI_ISL_9130348, EPI_ISL_9247632, EPI_ISL_9249196, EPI_ISL_9251430, EPI_ISL_9253217                                                                                                                                                                                                                                                                                                                                                                                                                                                                                                                                                                                                                                                                                                                                                                                                                                                                                                                                                                                         |                                                                                          |                                                                                                                                            |                                                                                                                                                                                                                                                                                                                                                                                                                                                                          |
| see above                                                                                                                                                                                                                                                                                                                                                                                                                                                                                                                                                                                                                                                                                                                                                                                                                                                                                                                                                                                                                                                                                                                                                                                                                                                                                                                                                                                                                                                                                                                                                                                                                                                                                                                                                                                                                                                                                                                                                                                                                                                                                                                                                                                                                                                                                                                                                                                                                                                                                                                                                                                                                                                                                                                                                                                                                                                                                                                                                                                                                                                   | Berkshire and Surrey Pathology Services Lighthouse Laboratory                            | Wellcome Sanger Institute for the COVID-19 Genomics UK (COG-UK) Consortium                                                                 | Berkshire and Surrey Pathology Services Lighthouse Laboratory and Alex Alderton; Cordelia Langford; David K. Jackson; Dominic Kwiatkowski; Ewan Harrison; Ian Johnston; Jeffrey Barrett; John Sillitoe on behalf of the Wellcome Sanger Institute COVID-19 Surveillance Team; Roberto Amato; Sonia Goncalves                                                                                                                                                             |
| EPI_ISL_9561911                                                                                                                                                                                                                                                                                                                                                                                                                                                                                                                                                                                                                                                                                                                                                                                                                                                                                                                                                                                                                                                                                                                                                                                                                                                                                                                                                                                                                                                                                                                                                                                                                                                                                                                                                                                                                                                                                                                                                                                                                                                                                                                                                                                                                                                                                                                                                                                                                                                                                                                                                                                                                                                                                                                                                                                                                                                                                                                                                                                                                                             | Bioanalytica SA                                                                          | Genesupport                                                                                                                                | Geraldine Jost; Katia Jatou; Nadia Liassine; Tangyu ARAUD                                                                                                                                                                                                                                                                                                                                                                                                                |
| EPI_ISL_9787007, EPI_ISL_9787008, EPI_ISL_9787009, EPI_ISL_9787010, EPI_ISL_9787011                                                                                                                                                                                                                                                                                                                                                                                                                                                                                                                                                                                                                                                                                                                                                                                                                                                                                                                                                                                                                                                                                                                                                                                                                                                                                                                                                                                                                                                                                                                                                                                                                                                                                                                                                                                                                                                                                                                                                                                                                                                                                                                                                                                                                                                                                                                                                                                                                                                                                                                                                                                                                                                                                                                                                                                                                                                                                                                                                                         | Bioassay, THSTI, Faridabad                                                               | Molecular Genetics Laboratory, THSTI, Faridabad                                                                                            | DR. JYOTI VERMA; DR.BHABATOSH DAS; Dr. Pradipta Jana; Dr. Shakti Kumar; MS.SONALI POREY KARMAKAR; Roshan Kumar                                                                                                                                                                                                                                                                                                                                                           |
| EPI_ISL_9731001, EPI_ISL_9731480, EPI_ISL_9731556, EPI_ISL_9732057, EPI_ISL_9732171, EPI_ISL_9732568, EPI_ISL_9733429, EPI_ISL_9733658                                                                                                                                                                                                                                                                                                                                                                                                                                                                                                                                                                                                                                                                                                                                                                                                                                                                                                                                                                                                                                                                                                                                                                                                                                                                                                                                                                                                                                                                                                                                                                                                                                                                                                                                                                                                                                                                                                                                                                                                                                                                                                                                                                                                                                                                                                                                                                                                                                                                                                                                                                                                                                                                                                                                                                                                                                                                                                                      |                                                                                          |                                                                                                                                            |                                                                                                                                                                                                                                                                                                                                                                                                                                                                          |
| see above                                                                                                                                                                                                                                                                                                                                                                                                                                                                                                                                                                                                                                                                                                                                                                                                                                                                                                                                                                                                                                                                                                                                                                                                                                                                                                                                                                                                                                                                                                                                                                                                                                                                                                                                                                                                                                                                                                                                                                                                                                                                                                                                                                                                                                                                                                                                                                                                                                                                                                                                                                                                                                                                                                                                                                                                                                                                                                                                                                                                                                                   | Bioscientia Labor Wermsdorf                                                              | Robert Koch Institute                                                                                                                      |                                                                                                                                                                                                                                                                                                                                                                                                                                                                          |
| EPI_ISL_9766493, EPI_ISL_9766610, EPI_ISL_9766642, EPI_ISL_9767099, EPI_ISL_9767121, EPI_ISL_9767411, EPI_ISL_9767458, EPI_ISL_9767509, EPI_ISL_9767512, EPI_ISL_9767517, EPI_ISL_9767526                                                                                                                                                                                                                                                                                                                                                                                                                                                                                                                                                                                                                                                                                                                                                                                                                                                                                                                                                                                                                                                                                                                                                                                                                                                                                                                                                                                                                                                                                                                                                                                                                                                                                                                                                                                                                                                                                                                                                                                                                                                                                                                                                                                                                                                                                                                                                                                                                                                                                                                                                                                                                                                                                                                                                                                                                                                                   |                                                                                          |                                                                                                                                            |                                                                                                                                                                                                                                                                                                                                                                                                                                                                          |
| see above                                                                                                                                                                                                                                                                                                                                                                                                                                                                                                                                                                                                                                                                                                                                                                                                                                                                                                                                                                                                                                                                                                                                                                                                                                                                                                                                                                                                                                                                                                                                                                                                                                                                                                                                                                                                                                                                                                                                                                                                                                                                                                                                                                                                                                                                                                                                                                                                                                                                                                                                                                                                                                                                                                                                                                                                                                                                                                                                                                                                                                                   | British Columbia Centre For Disease Control                                              | BCCDC Public Health Laboratory                                                                                                             | Ana Pacagnella; Corinne Ng; Dan Fornika; James Zlosnik; John Tyson; Kim Macdonald; Kimia Kamelian; Linda Hoang; Loretta Janz; Mel Krajdenc; Prystajecyke Natalie; Robert Azana; Shannon Russell                                                                                                                                                                                                                                                                          |
| EPI_ISL_9238645, EPI_ISL_9239079, EPI_ISL_9239092, EPI_ISL_9239851, EPI_ISL_9240065, EPI_ISL_9240478, EPI_ISL_9262259, EPI_ISL_9262997, EPI_ISL_9278423, EPI_ISL_9279639, EPI_ISL_9279702, EPI_ISL_9281222, EPI_ISL_9281607                                                                                                                                                                                                                                                                                                                                                                                                                                                                                                                                                                                                                                                                                                                                                                                                                                                                                                                                                                                                                                                                                                                                                                                                                                                                                                                                                                                                                                                                                                                                                                                                                                                                                                                                                                                                                                                                                                                                                                                                                                                                                                                                                                                                                                                                                                                                                                                                                                                                                                                                                                                                                                                                                                                                                                                                                                 |                                                                                          |                                                                                                                                            |                                                                                                                                                                                                                                                                                                                                                                                                                                                                          |
| see above                                                                                                                                                                                                                                                                                                                                                                                                                                                                                                                                                                                                                                                                                                                                                                                                                                                                                                                                                                                                                                                                                                                                                                                                                                                                                                                                                                                                                                                                                                                                                                                                                                                                                                                                                                                                                                                                                                                                                                                                                                                                                                                                                                                                                                                                                                                                                                                                                                                                                                                                                                                                                                                                                                                                                                                                                                                                                                                                                                                                                                                   | Broad Institute Clinical Research Sequencing Platform                                    | Infectious Disease Program, Broad Institute of Harvard and MIT                                                                             | Adams, G.; B.L.; B.W.; Bauer, M.; Birren; Blumenstiel, B.; Brown, K.C.; Carter, A.; Chaluwadi, S.; D.J.; DeFelice, M.; DeRuff, K.; Dodge, S.; Gabriel, S.; Gallagher, G.; Gladden-Young, A.; Granger, B.; J.E.; K.J.; Lagerborg, K.; Larkin, K.; Lee, M.; Lemieux; Lennon, N.; Loreth, C.; Madoff, L.; McGovern, S.; Meldrim, J.; Normandin, E.; P.C.; Park; Pearlman, L.; Reilly, S.; Rudy, M.; Sabeti; Siddle; Smole, S.; Tomkins-Tinch, C.; Vicente, G.; and MacInnis |

|                                                                                                                                                                                                                                                                                                                                                                                                                                                                                                                                                                                                                                                                                                                                                                                                                                                                                                                                                                                                                                                                                                                                                                                                                                                                                                                                                                                                                                                                                                                                                                                                                                                                                                                                                                                                                                                                                                                                                                                                                                                                                                                                                                                                                                                                                 |                                                                                          |                                                                                                                                                                                              |                                                                                                                                                                                                                                                                                                                                                                                                                                                  |
|---------------------------------------------------------------------------------------------------------------------------------------------------------------------------------------------------------------------------------------------------------------------------------------------------------------------------------------------------------------------------------------------------------------------------------------------------------------------------------------------------------------------------------------------------------------------------------------------------------------------------------------------------------------------------------------------------------------------------------------------------------------------------------------------------------------------------------------------------------------------------------------------------------------------------------------------------------------------------------------------------------------------------------------------------------------------------------------------------------------------------------------------------------------------------------------------------------------------------------------------------------------------------------------------------------------------------------------------------------------------------------------------------------------------------------------------------------------------------------------------------------------------------------------------------------------------------------------------------------------------------------------------------------------------------------------------------------------------------------------------------------------------------------------------------------------------------------------------------------------------------------------------------------------------------------------------------------------------------------------------------------------------------------------------------------------------------------------------------------------------------------------------------------------------------------------------------------------------------------------------------------------------------------|------------------------------------------------------------------------------------------|----------------------------------------------------------------------------------------------------------------------------------------------------------------------------------------------|--------------------------------------------------------------------------------------------------------------------------------------------------------------------------------------------------------------------------------------------------------------------------------------------------------------------------------------------------------------------------------------------------------------------------------------------------|
| EPI_ISL_9322113                                                                                                                                                                                                                                                                                                                                                                                                                                                                                                                                                                                                                                                                                                                                                                                                                                                                                                                                                                                                                                                                                                                                                                                                                                                                                                                                                                                                                                                                                                                                                                                                                                                                                                                                                                                                                                                                                                                                                                                                                                                                                                                                                                                                                                                                 | CENTRE HOSPITALIER                                                                       | CNR Virus des Infections Respiratoires - France SUD                                                                                                                                          | Antonin Bal; Bruno Lina; Bruno Simon; Gregory Destras; Gwendolyne Burfin; Hadrien Regue; Laurence Josset; Martine Valette; Quentin Semanas; Théophile Boyer                                                                                                                                                                                                                                                                                      |
| EPI_ISL_9597971                                                                                                                                                                                                                                                                                                                                                                                                                                                                                                                                                                                                                                                                                                                                                                                                                                                                                                                                                                                                                                                                                                                                                                                                                                                                                                                                                                                                                                                                                                                                                                                                                                                                                                                                                                                                                                                                                                                                                                                                                                                                                                                                                                                                                                                                 | CENTRE HOSPITALIER ALPES LEMAN                                                           | CNR Virus des Infections Respiratoires - France SUD                                                                                                                                          | Antonin Bal; Bruno Lina; Bruno Simon; Gregory Destras; Gwendolyne Burfin; Hadrien Regue; Laurence Josset; Martine Valette; Quentin Semanas; Théophile Boyer                                                                                                                                                                                                                                                                                      |
| EPI_ISL_9602488                                                                                                                                                                                                                                                                                                                                                                                                                                                                                                                                                                                                                                                                                                                                                                                                                                                                                                                                                                                                                                                                                                                                                                                                                                                                                                                                                                                                                                                                                                                                                                                                                                                                                                                                                                                                                                                                                                                                                                                                                                                                                                                                                                                                                                                                 | CENTRE HOSPITALIER DE LA COTE BASQUE                                                     | CNR Virus des Infections Respiratoires - France SUD                                                                                                                                          | Antonin Bal; Bruno Lina; Bruno Simon; Gregory Destras; Gwendolyne Burfin; Hadrien Regue; Laurence Josset; Martine Valette; Quentin Semanas; Théophile Boyer                                                                                                                                                                                                                                                                                      |
| EPI_ISL_9598273                                                                                                                                                                                                                                                                                                                                                                                                                                                                                                                                                                                                                                                                                                                                                                                                                                                                                                                                                                                                                                                                                                                                                                                                                                                                                                                                                                                                                                                                                                                                                                                                                                                                                                                                                                                                                                                                                                                                                                                                                                                                                                                                                                                                                                                                 | CENTRE HOSPITALIER MOULINS YZEURE                                                        | CNR Virus des Infections Respiratoires - France SUD                                                                                                                                          | Antonin Bal; Bruno Lina; Bruno Simon; Gregory Destras; Gwendolyne Burfin; Hadrien Regue; Laurence Josset; Martine Valette; Quentin Semanas; Théophile Boyer                                                                                                                                                                                                                                                                                      |
| EPI_ISL_9598458                                                                                                                                                                                                                                                                                                                                                                                                                                                                                                                                                                                                                                                                                                                                                                                                                                                                                                                                                                                                                                                                                                                                                                                                                                                                                                                                                                                                                                                                                                                                                                                                                                                                                                                                                                                                                                                                                                                                                                                                                                                                                                                                                                                                                                                                 | CENTRE HOSPITALIER VAL D'ARIEGE                                                          | CNR Virus des Infections Respiratoires - France SUD                                                                                                                                          | Antonin Bal; Bruno Lina; Bruno Simon; Gregory Destras; Gwendolyne Burfin; Hadrien Regue; Laurence Josset; Martine Valette; Quentin Semanas; Théophile Boyer                                                                                                                                                                                                                                                                                      |
| EPI_ISL_9550583                                                                                                                                                                                                                                                                                                                                                                                                                                                                                                                                                                                                                                                                                                                                                                                                                                                                                                                                                                                                                                                                                                                                                                                                                                                                                                                                                                                                                                                                                                                                                                                                                                                                                                                                                                                                                                                                                                                                                                                                                                                                                                                                                                                                                                                                 | CERBALLIANCE BOURGOGNE SITE ST REMY                                                      | CERBA HealthCare                                                                                                                                                                             | Bénédictte Roquebert; Laura Verdurme; Mathilde Roussel; Sabine Trombert; Stéphanie Haim-Boukobza                                                                                                                                                                                                                                                                                                                                                 |
| EPI_ISL_9627944                                                                                                                                                                                                                                                                                                                                                                                                                                                                                                                                                                                                                                                                                                                                                                                                                                                                                                                                                                                                                                                                                                                                                                                                                                                                                                                                                                                                                                                                                                                                                                                                                                                                                                                                                                                                                                                                                                                                                                                                                                                                                                                                                                                                                                                                 | CERBALLIANCE COTE D'AZUR                                                                 | CERBA HealthCare                                                                                                                                                                             | Bénédictte Roquebert; Laura Verdurme; Mathilde Roussel; Sabine Trombert; Stéphanie Haim-Boukobza                                                                                                                                                                                                                                                                                                                                                 |
| EPI_ISL_9257744, EPI_ISL_9257745, EPI_ISL_9692930, EPI_ISL_9692941                                                                                                                                                                                                                                                                                                                                                                                                                                                                                                                                                                                                                                                                                                                                                                                                                                                                                                                                                                                                                                                                                                                                                                                                                                                                                                                                                                                                                                                                                                                                                                                                                                                                                                                                                                                                                                                                                                                                                                                                                                                                                                                                                                                                              | CERBALLIANCE PARIS ET IDF EST                                                            | CERBA HealthCare                                                                                                                                                                             | Bénédictte Roquebert; Laura Verdurme; Mathilde Roussel; Sabine Trombert; Stéphanie Haim-Boukobza                                                                                                                                                                                                                                                                                                                                                 |
| EPI_ISL_9300771, EPI_ISL_9300772                                                                                                                                                                                                                                                                                                                                                                                                                                                                                                                                                                                                                                                                                                                                                                                                                                                                                                                                                                                                                                                                                                                                                                                                                                                                                                                                                                                                                                                                                                                                                                                                                                                                                                                                                                                                                                                                                                                                                                                                                                                                                                                                                                                                                                                | CH Lisboa Central                                                                        | Instituto Nacional de Saude (INSA)                                                                                                                                                           | Borges et al                                                                                                                                                                                                                                                                                                                                                                                                                                     |
| EPI_ISL_9598547                                                                                                                                                                                                                                                                                                                                                                                                                                                                                                                                                                                                                                                                                                                                                                                                                                                                                                                                                                                                                                                                                                                                                                                                                                                                                                                                                                                                                                                                                                                                                                                                                                                                                                                                                                                                                                                                                                                                                                                                                                                                                                                                                                                                                                                                 | CH MONT DE MARSAN (LAYNE)                                                                | CNR Virus des Infections Respiratoires - France SUD                                                                                                                                          | Antonin Bal; Bruno Lina; Bruno Simon; Gregory Destras; Gwendolyne Burfin; Hadrien Regue; Laurence Josset; Martine Valette; Quentin Semanas; Théophile Boyer                                                                                                                                                                                                                                                                                      |
| EPI_ISL_9327723                                                                                                                                                                                                                                                                                                                                                                                                                                                                                                                                                                                                                                                                                                                                                                                                                                                                                                                                                                                                                                                                                                                                                                                                                                                                                                                                                                                                                                                                                                                                                                                                                                                                                                                                                                                                                                                                                                                                                                                                                                                                                                                                                                                                                                                                 | CHU BORDEAUX                                                                             | CHU BORDEAUX                                                                                                                                                                                 | Agnès George-Walryck; Laurent Busson; Marie-Edith Lafon; Pantxika Bellecave; Valentine Lesourd-Aubert                                                                                                                                                                                                                                                                                                                                            |
| EPI_ISL_9143583                                                                                                                                                                                                                                                                                                                                                                                                                                                                                                                                                                                                                                                                                                                                                                                                                                                                                                                                                                                                                                                                                                                                                                                                                                                                                                                                                                                                                                                                                                                                                                                                                                                                                                                                                                                                                                                                                                                                                                                                                                                                                                                                                                                                                                                                 | CHU Pontchailoux                                                                         | CHU Pontchailoux                                                                                                                                                                             | DE TAYRAC Marie; DENOUAL Florent; ETCHEVERRY Amandine; FEBREAU Christine; GALIBERT Marie Dominique; GROLHIER Claire; JAGLINE Steven; PRONIER Charlotte; QUENET Benjamin; SASSI Mohamed; THIBAUT Vincent                                                                                                                                                                                                                                          |
| EPI_ISL_9177472                                                                                                                                                                                                                                                                                                                                                                                                                                                                                                                                                                                                                                                                                                                                                                                                                                                                                                                                                                                                                                                                                                                                                                                                                                                                                                                                                                                                                                                                                                                                                                                                                                                                                                                                                                                                                                                                                                                                                                                                                                                                                                                                                                                                                                                                 | CHU UCL Namur, Avenue G. Thérasse 1, 5530 Yvoir, Belgium                                 | Plateforme de testing Namuroise                                                                                                                                                              | Degossier Jonathan; Demars Aurore; Denis Olivier; Drugmand Jonathan; Maschietto Céline; Mullier François; Nobis Chloé; Otto Gaetan                                                                                                                                                                                                                                                                                                               |
| EPI_ISL_9599057                                                                                                                                                                                                                                                                                                                                                                                                                                                                                                                                                                                                                                                                                                                                                                                                                                                                                                                                                                                                                                                                                                                                                                                                                                                                                                                                                                                                                                                                                                                                                                                                                                                                                                                                                                                                                                                                                                                                                                                                                                                                                                                                                                                                                                                                 | CLINIQUE ESQUIROL-ST HILAIRE                                                             | CNR Virus des Infections Respiratoires - France SUD                                                                                                                                          | Antonin Bal; Bruno Lina; Bruno Simon; Gregory Destras; Gwendolyne Burfin; Hadrien Regue; Laurence Josset; Martine Valette; Quentin Semanas; Théophile Boyer                                                                                                                                                                                                                                                                                      |
| EPI_ISL_9319595, EPI_ISL_9322517, EPI_ISL_9603784                                                                                                                                                                                                                                                                                                                                                                                                                                                                                                                                                                                                                                                                                                                                                                                                                                                                                                                                                                                                                                                                                                                                                                                                                                                                                                                                                                                                                                                                                                                                                                                                                                                                                                                                                                                                                                                                                                                                                                                                                                                                                                                                                                                                                               | CNR Virus des Infections Respiratoires - France SUD                                      | CNR Virus des Infections Respiratoires - France SUD                                                                                                                                          | Antonin Bal; Bruno Lina; Bruno Simon; Gregory Destras; Gwendolyne Burfin; Hadrien Regue; Laurence Josset; Martine Valette; Quentin Semanas; Théophile Boyer; Théophile Boyer                                                                                                                                                                                                                                                                     |
| EPI_ISL_9730324, EPI_ISL_9730339                                                                                                                                                                                                                                                                                                                                                                                                                                                                                                                                                                                                                                                                                                                                                                                                                                                                                                                                                                                                                                                                                                                                                                                                                                                                                                                                                                                                                                                                                                                                                                                                                                                                                                                                                                                                                                                                                                                                                                                                                                                                                                                                                                                                                                                | COMMAND HOSPITAL                                                                         | National Center for Biological Sciences, TIFR - Rockefeller Foundation                                                                                                                       | Awadhesh Pandit; Bhagyashree Madhav Shelar; Darshan Sreenivas; Dimple Notani; Kathirvel Kandasamy; Lakshminarayanan CP; Satyajit Mayor; Uma Ramakrishnan                                                                                                                                                                                                                                                                                         |
| EPI_ISL_9352416, EPI_ISL_9352418, EPI_ISL_9352423, EPI_ISL_9352424, EPI_ISL_9352425, EPI_ISL_9352426, EPI_ISL_9352427, EPI_ISL_9352429, EPI_ISL_9352430, EPI_ISL_9352431, EPI_ISL_9352432, EPI_ISL_9352433, EPI_ISL_9352435, EPI_ISL_9352442, EPI_ISL_9352443, EPI_ISL_9352445, EPI_ISL_9352447, EPI_ISL_9352448, EPI_ISL_9352454, EPI_ISL_9352455, EPI_ISL_9352456, EPI_ISL_9352458, EPI_ISL_9352459, EPI_ISL_9352460, EPI_ISL_9352461, EPI_ISL_9352462, EPI_ISL_9352464, EPI_ISL_9352465, EPI_ISL_9352466, EPI_ISL_9352468, EPI_ISL_9352469, EPI_ISL_9352470, EPI_ISL_9352472, EPI_ISL_9352473, EPI_ISL_9352474, EPI_ISL_9352475, EPI_ISL_9352478, EPI_ISL_9352479, EPI_ISL_9352485, EPI_ISL_9352486, EPI_ISL_9352487, EPI_ISL_9352488, EPI_ISL_9352489, EPI_ISL_9352490, EPI_ISL_9352492, EPI_ISL_9352493, EPI_ISL_9352497, EPI_ISL_9352498, EPI_ISL_9352499, EPI_ISL_9352501, EPI_ISL_9352502, EPI_ISL_9352503, EPI_ISL_9352604, EPI_ISL_9352609, EPI_ISL_9352610, EPI_ISL_9352615, EPI_ISL_9352619, EPI_ISL_9352628, EPI_ISL_9352634, EPI_ISL_9352648                                                                                                                                                                                                                                                                                                                                                                                                                                                                                                                                                                                                                                                                                                                                                                                                                                                                                                                                                                                                                                                                                                                                                                                                                      |                                                                                          | Krishna Khairnar et al.                                                                                                                                                                      |                                                                                                                                                                                                                                                                                                                                                                                                                                                  |
| see above                                                                                                                                                                                                                                                                                                                                                                                                                                                                                                                                                                                                                                                                                                                                                                                                                                                                                                                                                                                                                                                                                                                                                                                                                                                                                                                                                                                                                                                                                                                                                                                                                                                                                                                                                                                                                                                                                                                                                                                                                                                                                                                                                                                                                                                                       | CSIR-NEERI, Nagpur Covid-19 Testing Lab                                                  | CSIR-NEERI, Nagpur Covid-19 Testing Lab                                                                                                                                                      |                                                                                                                                                                                                                                                                                                                                                                                                                                                  |
| EPI_ISL_9234861, EPI_ISL_9234862, EPI_ISL_9234863, EPI_ISL_9234864, EPI_ISL_9234865, EPI_ISL_9234866                                                                                                                                                                                                                                                                                                                                                                                                                                                                                                                                                                                                                                                                                                                                                                                                                                                                                                                                                                                                                                                                                                                                                                                                                                                                                                                                                                                                                                                                                                                                                                                                                                                                                                                                                                                                                                                                                                                                                                                                                                                                                                                                                                            | CSIR-NEIST, JORHAT                                                                       | Centre for Infectious Diseases, CSIR-NEIST                                                                                                                                                   | G Narahari Sastry; Gayatri Gogoi; Jatin Kalita; Moirangthem G Singh; Munmi Bora; Pankaj Bharali; Romi Wahengbam; Yasmin B Tapaddar                                                                                                                                                                                                                                                                                                               |
| EPI_ISL_9509699                                                                                                                                                                                                                                                                                                                                                                                                                                                                                                                                                                                                                                                                                                                                                                                                                                                                                                                                                                                                                                                                                                                                                                                                                                                                                                                                                                                                                                                                                                                                                                                                                                                                                                                                                                                                                                                                                                                                                                                                                                                                                                                                                                                                                                                                 | CSK MSWIA                                                                                | 1. Academic Center for Pathomorphological and Genetic-Molecular Diagnostics Ltd, Białystok, Poland<br>2. National Institute of Public Health - National Institute of Hygiene, Warsaw, Poland | Anetta Sulewska; Jacek Nikliński; Janusz Dzięcioł; Joanna Kiśluk; Katarzyna Zacharczuk; Konrad Raczkowski; Magdalena Nowakowska; Małgorzata Sadkowska-Todys; Piotr Karabowicz; Piotr Majewski; Przemysław Biełek. Joanna Reszeć; Radosław Charkiewicz; Tomasz Wolkowicz                                                                                                                                                                          |
| EPI_ISL_9697079                                                                                                                                                                                                                                                                                                                                                                                                                                                                                                                                                                                                                                                                                                                                                                                                                                                                                                                                                                                                                                                                                                                                                                                                                                                                                                                                                                                                                                                                                                                                                                                                                                                                                                                                                                                                                                                                                                                                                                                                                                                                                                                                                                                                                                                                 | Cantacuzino National Military-Medical Institute, Viral Respiratory Infections Laboratory | Cantacuzino National Military-Medical Institute, Viral Respiratory Infections Laboratory                                                                                                     | Carmen Cherciu; Luiza Ustea; Mihaela Lazar; Mihaela Oprea; Oana Vitencu; Sorin Dinu                                                                                                                                                                                                                                                                                                                                                              |
| EPI_ISL_8885501, EPI_ISL_9610172, EPI_ISL_9610173, EPI_ISL_9610183, EPI_ISL_9610240                                                                                                                                                                                                                                                                                                                                                                                                                                                                                                                                                                                                                                                                                                                                                                                                                                                                                                                                                                                                                                                                                                                                                                                                                                                                                                                                                                                                                                                                                                                                                                                                                                                                                                                                                                                                                                                                                                                                                                                                                                                                                                                                                                                             | Cellcare Patholab, Ahmedabad                                                             | Gujarat Biotechnology Research Centre                                                                                                                                                        | Akhilesh Modi; Apurvashin Puvar; Bhadrashin Gohil; Chaitanya Joshi; Dhyanesh Desai; Disha Vora; Janvi Raval; Jaykumar Rangani; Madhvi Joshi; Nimesh Patel; Nitin Savaliya; NitinShukla; Priyank Chavda; Ramesh Pandit; Roshani Mishra; Sonal Sharma; Tasnim Trivedi; Zarna Patel                                                                                                                                                                 |
| EPI_ISL_9156891, EPI_ISL_9156920, EPI_ISL_9156925                                                                                                                                                                                                                                                                                                                                                                                                                                                                                                                                                                                                                                                                                                                                                                                                                                                                                                                                                                                                                                                                                                                                                                                                                                                                                                                                                                                                                                                                                                                                                                                                                                                                                                                                                                                                                                                                                                                                                                                                                                                                                                                                                                                                                               | Center for Laboratory Medicine                                                           | Center for Laboratory Medicine, ZLMSG                                                                                                                                                        | Yannick Gerth                                                                                                                                                                                                                                                                                                                                                                                                                                    |
| EPI_ISL_9626931, EPI_ISL_9626932, EPI_ISL_9626933, EPI_ISL_9626934                                                                                                                                                                                                                                                                                                                                                                                                                                                                                                                                                                                                                                                                                                                                                                                                                                                                                                                                                                                                                                                                                                                                                                                                                                                                                                                                                                                                                                                                                                                                                                                                                                                                                                                                                                                                                                                                                                                                                                                                                                                                                                                                                                                                              | Center for Virology, Medical University of Vienna                                        | Bergthaler laboratory, CeMM Research Center for Molecular Medicine of the Austrian Academy of Sciences                                                                                       | Andreas Bergthaler; Anna Schedi; Bekir Erguner; Benedikt Agerer; Christoph Bock; Fabian Amman; Jan Laine; Lukas Endler; Martin Senekowitsch; Matthew Thornton; Michael Schuster; Michelle Chan; Petr Triska; Thomas Penz                                                                                                                                                                                                                         |
| EPI_ISL_9392048, EPI_ISL_9392051                                                                                                                                                                                                                                                                                                                                                                                                                                                                                                                                                                                                                                                                                                                                                                                                                                                                                                                                                                                                                                                                                                                                                                                                                                                                                                                                                                                                                                                                                                                                                                                                                                                                                                                                                                                                                                                                                                                                                                                                                                                                                                                                                                                                                                                | Central Health Laboratory, Ministry of Health and Wellness                               | Central Health Laboratory, Ministry of Health and Wellness                                                                                                                                   | Chinniah K; Jannoo N; Mathur H; Ramuth M; Sonoo J; Sujeevon C; Ubheeram J Baboo SB                                                                                                                                                                                                                                                                                                                                                               |
| EPI_ISL_9324954                                                                                                                                                                                                                                                                                                                                                                                                                                                                                                                                                                                                                                                                                                                                                                                                                                                                                                                                                                                                                                                                                                                                                                                                                                                                                                                                                                                                                                                                                                                                                                                                                                                                                                                                                                                                                                                                                                                                                                                                                                                                                                                                                                                                                                                                 | Centre Hospitalier Universitaire Clermont-Ferrand                                        | CHU Clermont-Ferrand, service de virologie                                                                                                                                                   | Bisseux Maxime; Combes Patricia; Henquel Cecile; Mirand Audrey                                                                                                                                                                                                                                                                                                                                                                                   |
| EPI_ISL_9791324                                                                                                                                                                                                                                                                                                                                                                                                                                                                                                                                                                                                                                                                                                                                                                                                                                                                                                                                                                                                                                                                                                                                                                                                                                                                                                                                                                                                                                                                                                                                                                                                                                                                                                                                                                                                                                                                                                                                                                                                                                                                                                                                                                                                                                                                 | Centre Hospitalier Universitaire de Rouen Laboratoire de Virologie                       | Centre Hospitalier Universitaire de Rouen Laboratoire de Virologie                                                                                                                           | Alice Moisan; Fabienne De Oliveira; Marie Leoz                                                                                                                                                                                                                                                                                                                                                                                                   |
| EPI_ISL_9446305                                                                                                                                                                                                                                                                                                                                                                                                                                                                                                                                                                                                                                                                                                                                                                                                                                                                                                                                                                                                                                                                                                                                                                                                                                                                                                                                                                                                                                                                                                                                                                                                                                                                                                                                                                                                                                                                                                                                                                                                                                                                                                                                                                                                                                                                 | Chemische und Veterinäruntersuchungsamt Münsterland-Emscher-Lippe (CVUA-MEL)             | Robert Koch Institute                                                                                                                                                                        |                                                                                                                                                                                                                                                                                                                                                                                                                                                  |
| EPI_ISL_9338550                                                                                                                                                                                                                                                                                                                                                                                                                                                                                                                                                                                                                                                                                                                                                                                                                                                                                                                                                                                                                                                                                                                                                                                                                                                                                                                                                                                                                                                                                                                                                                                                                                                                                                                                                                                                                                                                                                                                                                                                                                                                                                                                                                                                                                                                 | Children's Research and Clinical Center for Infectious Diseases                          | WHO National Influenza Centre Russian Federation                                                                                                                                             | Andrey Komissarov; Artem Fadeev; Daria Danilenko; Dmitry Lioznov; Elena Nabieva; Georgii Bazzykin; Kirill Varchenko; Ksenia Safina; Kseniya Komissarova; Maria Pisareva; Mikhail Bakae; Nikita Yolshin; Oula Mansour; Tamila Musaeva; Veronika Eder                                                                                                                                                                                              |
| EPI_ISL_9338640, EPI_ISL_9338650                                                                                                                                                                                                                                                                                                                                                                                                                                                                                                                                                                                                                                                                                                                                                                                                                                                                                                                                                                                                                                                                                                                                                                                                                                                                                                                                                                                                                                                                                                                                                                                                                                                                                                                                                                                                                                                                                                                                                                                                                                                                                                                                                                                                                                                | City Polyclinic No 3                                                                     | WHO National Influenza Centre Russian Federation                                                                                                                                             | Andrey Komissarov; Artem Fadeev; Daria Danilenko; Dmitry Lioznov; Elena Nabieva; Georgii Bazzykin; Kirill Varchenko; Ksenia Safina; Kseniya Komissarova; Maria Pisareva; Mikhail Bakae; Nikita Yolshin; Oula Mansour; Tamila Musaeva; Veronika Eder                                                                                                                                                                                              |
| EPI_ISL_9196452                                                                                                                                                                                                                                                                                                                                                                                                                                                                                                                                                                                                                                                                                                                                                                                                                                                                                                                                                                                                                                                                                                                                                                                                                                                                                                                                                                                                                                                                                                                                                                                                                                                                                                                                                                                                                                                                                                                                                                                                                                                                                                                                                                                                                                                                 | City of Milwaukee Health Department Laboratory                                           | City of Milwaukee Health Department Laboratory                                                                                                                                               | Amy Bauer; Manjeet Khubbar; Sanjib Bhattacharyya                                                                                                                                                                                                                                                                                                                                                                                                 |
| EPI_ISL_9214009, EPI_ISL_9214012, EPI_ISL_9214045                                                                                                                                                                                                                                                                                                                                                                                                                                                                                                                                                                                                                                                                                                                                                                                                                                                                                                                                                                                                                                                                                                                                                                                                                                                                                                                                                                                                                                                                                                                                                                                                                                                                                                                                                                                                                                                                                                                                                                                                                                                                                                                                                                                                                               | Clemenshospital - Alexianer Clemenshospital Münster                                      | Robert Koch Institute                                                                                                                                                                        |                                                                                                                                                                                                                                                                                                                                                                                                                                                  |
| EPI_ISL_9224128, EPI_ISL_9224129, EPI_ISL_9224130, EPI_ISL_9224132, EPI_ISL_9224151, EPI_ISL_9224285, EPI_ISL_9224306, EPI_ISL_9224314, EPI_ISL_9224316, EPI_ISL_9224333, EPI_ISL_9224347                                                                                                                                                                                                                                                                                                                                                                                                                                                                                                                                                                                                                                                                                                                                                                                                                                                                                                                                                                                                                                                                                                                                                                                                                                                                                                                                                                                                                                                                                                                                                                                                                                                                                                                                                                                                                                                                                                                                                                                                                                                                                       |                                                                                          |                                                                                                                                                                                              |                                                                                                                                                                                                                                                                                                                                                                                                                                                  |
| see above                                                                                                                                                                                                                                                                                                                                                                                                                                                                                                                                                                                                                                                                                                                                                                                                                                                                                                                                                                                                                                                                                                                                                                                                                                                                                                                                                                                                                                                                                                                                                                                                                                                                                                                                                                                                                                                                                                                                                                                                                                                                                                                                                                                                                                                                       | Clinical Microbiology Laboratory, Tel Aviv Sourasky Medical Center                       | Clinical Microbiology Laboratory, Tel Aviv Sourasky Medical Center                                                                                                                           | Alon Ziv; Amos Adler; Goel Morad; Katya Levytskyy; Lior Handler; Matan Slutzkin; Ora Halutz                                                                                                                                                                                                                                                                                                                                                      |
| EPI_ISL_9397363, EPI_ISL_9397364, EPI_ISL_9397367, EPI_ISL_9397369, EPI_ISL_9397371, EPI_ISL_9397372, EPI_ISL_9397374, EPI_ISL_9397380, EPI_ISL_9397382, EPI_ISL_9397385, EPI_ISL_9397386, EPI_ISL_9397387, EPI_ISL_9397389, EPI_ISL_9397390, EPI_ISL_9397391, EPI_ISL_9397393, EPI_ISL_9397395, EPI_ISL_9397398, EPI_ISL_9397402, EPI_ISL_9397405, EPI_ISL_9397409, EPI_ISL_9397416, EPI_ISL_9397419, EPI_ISL_9397421, EPI_ISL_9397422, EPI_ISL_9397423, EPI_ISL_9397424, EPI_ISL_9397425, EPI_ISL_9397426, EPI_ISL_9397427, EPI_ISL_9397431, EPI_ISL_9397432, EPI_ISL_9397434, EPI_ISL_9397438, EPI_ISL_9397439, EPI_ISL_9397442, EPI_ISL_9397443, EPI_ISL_9397445, EPI_ISL_9397446, EPI_ISL_9397447, EPI_ISL_9397451, EPI_ISL_9397452, EPI_ISL_9397455, EPI_ISL_9397457, EPI_ISL_9397458, EPI_ISL_9397459, EPI_ISL_9397460, EPI_ISL_9397461, EPI_ISL_9397467, EPI_ISL_9397468, EPI_ISL_9397472, EPI_ISL_9397473, EPI_ISL_9397474, EPI_ISL_9397475, EPI_ISL_9397476, EPI_ISL_9397478, EPI_ISL_9397480, EPI_ISL_9397482, EPI_ISL_9397484, EPI_ISL_9397485, EPI_ISL_9397487, EPI_ISL_9397490, EPI_ISL_9397491, EPI_ISL_9397494, EPI_ISL_9397495, EPI_ISL_9397496, EPI_ISL_9397497, EPI_ISL_9397498, EPI_ISL_9397500, EPI_ISL_9397501, EPI_ISL_9397502, EPI_ISL_9397503, EPI_ISL_9397505, EPI_ISL_9397509, EPI_ISL_9397510, EPI_ISL_9397517, EPI_ISL_9397518, EPI_ISL_9397519, EPI_ISL_9397520, EPI_ISL_9397521, EPI_ISL_9397522, EPI_ISL_9397523, EPI_ISL_9397525, EPI_ISL_9397527, EPI_ISL_9397530, EPI_ISL_9397532, EPI_ISL_9397533, EPI_ISL_9397536, EPI_ISL_9397539, EPI_ISL_9397540, EPI_ISL_9397541, EPI_ISL_9397543, EPI_ISL_9397546, EPI_ISL_9397547, EPI_ISL_9397551, EPI_ISL_9397552, EPI_ISL_9397555, EPI_ISL_9397556, EPI_ISL_9397557, EPI_ISL_9397561, EPI_ISL_9397569, EPI_ISL_9397570, EPI_ISL_9397571, EPI_ISL_9397572, EPI_ISL_9397574, EPI_ISL_9397575, EPI_ISL_9397576, EPI_ISL_9397578, EPI_ISL_9397583, EPI_ISL_9397584, EPI_ISL_9397585, EPI_ISL_9397586, EPI_ISL_9397588, EPI_ISL_9397590, EPI_ISL_9397593, EPI_ISL_9397594, EPI_ISL_9397595, EPI_ISL_9397598, EPI_ISL_9397603, EPI_ISL_9397605, EPI_ISL_9397606, EPI_ISL_9397613, EPI_ISL_9397615, EPI_ISL_9397616, EPI_ISL_9397617, EPI_ISL_9397618, EPI_ISL_9397619, EPI_ISL_9397621, EPI_ISL_9397623 |                                                                                          |                                                                                                                                                                                              |                                                                                                                                                                                                                                                                                                                                                                                                                                                  |
| see above                                                                                                                                                                                                                                                                                                                                                                                                                                                                                                                                                                                                                                                                                                                                                                                                                                                                                                                                                                                                                                                                                                                                                                                                                                                                                                                                                                                                                                                                                                                                                                                                                                                                                                                                                                                                                                                                                                                                                                                                                                                                                                                                                                                                                                                                       | Clinical Microbiology, Infection Prevention and Control                                  | Section for Molecular Diagnostics                                                                                                                                                            | Björn Hallström; Jonas Björkman                                                                                                                                                                                                                                                                                                                                                                                                                  |
| EPI_ISL_9516610                                                                                                                                                                                                                                                                                                                                                                                                                                                                                                                                                                                                                                                                                                                                                                                                                                                                                                                                                                                                                                                                                                                                                                                                                                                                                                                                                                                                                                                                                                                                                                                                                                                                                                                                                                                                                                                                                                                                                                                                                                                                                                                                                                                                                                                                 | Clinical Virology                                                                        | Clinical Bacteriology, University Hospital Basel                                                                                                                                             | Adrian Egli; Alfredo Mari; Fanny Wegner; Hans Hirsch; Helena MB Seth-Smith; Julia Bielicki; Karoline Leuzinger; Manuel Battegay; Tim Roloff                                                                                                                                                                                                                                                                                                      |
| EPI_ISL_9164042                                                                                                                                                                                                                                                                                                                                                                                                                                                                                                                                                                                                                                                                                                                                                                                                                                                                                                                                                                                                                                                                                                                                                                                                                                                                                                                                                                                                                                                                                                                                                                                                                                                                                                                                                                                                                                                                                                                                                                                                                                                                                                                                                                                                                                                                 | Cliniques universitaires Saint-Luc                                                       | UCLouvain/REC/MBLG-CTMA                                                                                                                                                                      | Benoit Kabamba Mukadi; Bertrand Bearzato; Jean-Luc Gala; Nicolas Pinte; Paul Blanpain; Simon Ophélie; Valentin Coste                                                                                                                                                                                                                                                                                                                             |
| EPI_ISL_9395658, EPI_ISL_9676165                                                                                                                                                                                                                                                                                                                                                                                                                                                                                                                                                                                                                                                                                                                                                                                                                                                                                                                                                                                                                                                                                                                                                                                                                                                                                                                                                                                                                                                                                                                                                                                                                                                                                                                                                                                                                                                                                                                                                                                                                                                                                                                                                                                                                                                | Colorado Department of Public Health and Environment                                     | Colorado Department of Public Health and Environment                                                                                                                                         | Alexandria Rosshem; Arianna Smith; Diana Ir; Emily A. Travanty; Laura Bankers; Mandy Waters; Michael Martin; Molly C. Hetherington-Rauth; Shannon R. Matzinger                                                                                                                                                                                                                                                                                   |
| EPI_ISL_9528114, EPI_ISL_9528115, EPI_ISL_9528116, EPI_ISL_9528117                                                                                                                                                                                                                                                                                                                                                                                                                                                                                                                                                                                                                                                                                                                                                                                                                                                                                                                                                                                                                                                                                                                                                                                                                                                                                                                                                                                                                                                                                                                                                                                                                                                                                                                                                                                                                                                                                                                                                                                                                                                                                                                                                                                                              | DH Kuduhuvadhoo Hospital                                                                 | DH Kuduhuvadhoo Hospital                                                                                                                                                                     | D. Fathmath Nazla Rafeeq; Dr. Ibrahim Afzal; Mr. Ibrahim Nishan Ahmed; Ms. Aishath Shuhudha; Ms. Aminath Shaazleena Abdul Rahman; Ms. Soafy Mohamed                                                                                                                                                                                                                                                                                              |
| EPI_ISL_9744328                                                                                                                                                                                                                                                                                                                                                                                                                                                                                                                                                                                                                                                                                                                                                                                                                                                                                                                                                                                                                                                                                                                                                                                                                                                                                                                                                                                                                                                                                                                                                                                                                                                                                                                                                                                                                                                                                                                                                                                                                                                                                                                                                                                                                                                                 | DIVINE MERCY WELLNESS CENTER                                                             | Research Institute for Tropical Medicine                                                                                                                                                     | Alexander Sadiasa; Amalea Dulcene D. Nicolosora; Anne Pauline A. Alpino; Ariadne Ysabelle M. Dolor; Catalino S. Demetria; Criselda T. Bautista; Francisco Gerardo M. Polotan; Gerald Ivan Sotelo; Jefferson Earl J. Halog; Joseph Hughes; Joy Mariette L. Parayray; Kirstyn Brunker; Lei Lanna M. Dancel; Ma. Angelica A. Tujan; Mayan Uy-Lumandas; Othnel John T. Onza; Simon Daldry; Timothy John R. Dizon; Vina Lea F. Arguelles; Yao-Tsun Li |
| EPI_ISL_9549347                                                                                                                                                                                                                                                                                                                                                                                                                                                                                                                                                                                                                                                                                                                                                                                                                                                                                                                                                                                                                                                                                                                                                                                                                                                                                                                                                                                                                                                                                                                                                                                                                                                                                                                                                                                                                                                                                                                                                                                                                                                                                                                                                                                                                                                                 | DOHMH PHL                                                                                | New York City Public Health Laboratory                                                                                                                                                       | Jade Wang; et al.                                                                                                                                                                                                                                                                                                                                                                                                                                |
| EPI_ISL_9747171, EPI_ISL_9747172, EPI_ISL_9747173, EPI_ISL_9747174, EPI_ISL_9747175, EPI_ISL_9747176, EPI_ISL_9747177, EPI_ISL_9747179, EPI_ISL_9747397                                                                                                                                                                                                                                                                                                                                                                                                                                                                                                                                                                                                                                                                                                                                                                                                                                                                                                                                                                                                                                                                                                                                                                                                                                                                                                                                                                                                                                                                                                                                                                                                                                                                                                                                                                                                                                                                                                                                                                                                                                                                                                                         |                                                                                          |                                                                                                                                                                                              |                                                                                                                                                                                                                                                                                                                                                                                                                                                  |
| see above                                                                                                                                                                                                                                                                                                                                                                                                                                                                                                                                                                                                                                                                                                                                                                                                                                                                                                                                                                                                                                                                                                                                                                                                                                                                                                                                                                                                                                                                                                                                                                                                                                                                                                                                                                                                                                                                                                                                                                                                                                                                                                                                                                                                                                                                       | Department Clinical Microbiology, Baerum Hospital.                                       | Norwegian Institute of Public Health, Department of                                                                                                                                          | Atiya R Ali; Debech Nadia; Engnebresen Serina Beate; Garcia Llorente Ignacio; Hilde Elshaug; Hilde Nordby Falkenhaug; Hilde Vollan; Jon Bråte; Kamilla Heddeland Inestefjord; Karoline Bragstad; Kathrine Stene-Johansen; Line Victoria Møen; Marie Paulsen Madsen; Olav                                                                                                                                                                         |









|                                                                                                                                                                                                                                                                                                                                                    |                                                                                |                                                                                                                                                                                                                    |                                                                                                                                                                                                                                                                                                                                    |                                                                                                                                                                                                                                                                             |
|----------------------------------------------------------------------------------------------------------------------------------------------------------------------------------------------------------------------------------------------------------------------------------------------------------------------------------------------------|--------------------------------------------------------------------------------|--------------------------------------------------------------------------------------------------------------------------------------------------------------------------------------------------------------------|------------------------------------------------------------------------------------------------------------------------------------------------------------------------------------------------------------------------------------------------------------------------------------------------------------------------------------|-----------------------------------------------------------------------------------------------------------------------------------------------------------------------------------------------------------------------------------------------------------------------------|
| EPI_ISL_9626348                                                                                                                                                                                                                                                                                                                                    |                                                                                |                                                                                                                                                                                                                    |                                                                                                                                                                                                                                                                                                                                    |                                                                                                                                                                                                                                                                             |
| EPI_ISL_9598322                                                                                                                                                                                                                                                                                                                                    | GCS DE SAINTONGE - ST JEAN D'Y                                                 | CNR Virus des Infections Respiratoires - France SUD                                                                                                                                                                |                                                                                                                                                                                                                                                                                                                                    | Antonin Bal; Bruno Lina; Bruno Simon; Gregory Destras; Gwendolynne Burfin; Hadrien Regue; Laurence Josset; Martine Valette; Quentin Semanas; Theophile Boyer                                                                                                                |
| EPI_ISL_9775181                                                                                                                                                                                                                                                                                                                                    | GCS Medical College, Ahmedabad                                                 | Gujarat Biotechnology Research Centre                                                                                                                                                                              | Akhilesh Modi; Apurvasinh Puvar; Bhadreshsinh Gohil; Chaitanya Joshi; Disha Vora; Janvi Raval; Jaykumar Rangani; Madhvi Joshi; Neha Patel; Nimesh Patel; Nitin Savaliya; NitinShukla; Priyank Chavda; Ramesh Pandit; Roshani Mishra; Sonal Sharma; Tasnim Trivedi; Zarna Patel                                                     |                                                                                                                                                                                                                                                                             |
| EPI_ISL_9428179, EPI_ISL_9428235                                                                                                                                                                                                                                                                                                                   | GH A.CHENEVIER-H.MONDOR                                                        | Department of Virology, Henri Mondor University Hospital, Assistance Publique Hôpitaux de Paris, Université Paris-Est Créteil, INSERM U955                                                                         |                                                                                                                                                                                                                                                                                                                                    | Alexandre Soulier; Christophe Rodriguez; Elisabeth Trawinski; Guillaume Gricourt; Jean-Michel Pawlowsky; Melissa N'Debi; Slim Fourati; Vanessa Demontant                                                                                                                    |
| EPI_ISL_9023189, EPI_ISL_9612694, EPI_ISL_9612696                                                                                                                                                                                                                                                                                                  | GMERS Medical College, Gandhinagar                                             | Gujarat Biotechnology Research Centre                                                                                                                                                                              | Akhilesh Modi; Apurvasinh Puvar; Bhadreshsinh Gohil; Chaitanya Joshi; Disha Vora; Gaurishankar Shrimali; Janvi Raval; Jaykumar Rangani; Madhvi Joshi; Nimesh Patel; Nitin Savaliya; NitinShukla; Priyank Chavda; Ramesh Pandit; Roshani Mishra; Sonal Sharma; Sumita Soni; Tasnim Trivedi; Zarna Patel                             |                                                                                                                                                                                                                                                                             |
| EPI_ISL_9610204                                                                                                                                                                                                                                                                                                                                    | GMERS Medical College, Gotri, Vadodara                                         | Gujarat Biotechnology Research Centre                                                                                                                                                                              | Akhilesh Modi; Apurvasinh Puvar; Bhadreshsinh Gohil; Bithika; Chaitanya Joshi; Disha Vora; Janvi Raval; Jaykumar Rangani; Madhvi Joshi; Nimesh Patel; Nitin Savaliya; NitinShukla; Priyank Chavda; Ramesh Pandit; Roshani Mishra; Sonal Sharma; Tasnim Trivedi; Zarna Patel                                                        |                                                                                                                                                                                                                                                                             |
| EPI_ISL_9402991                                                                                                                                                                                                                                                                                                                                    | GMERS Medical College, Valsad                                                  | Gujarat Biotechnology Research Centre                                                                                                                                                                              | Akhilesh Modi; Apurvasinh Puvar; Bhadreshsinh Gohil; Chaitanya Joshi; Disha Vora; Janvi Raval; Jaykumar Rangani; Madhvi Joshi; Nimesh Patel; Nitin Savaliya; Nitin Shukla; Priyank Chavda; Ramesh Pandit; Roshani Mishra; Sonal Sharma; Tasnim Trivedi; Vicky Gandhi; Zarna Patel                                                  |                                                                                                                                                                                                                                                                             |
| EPI_ISL_9533280, EPI_ISL_9533281, EPI_ISL_9533283, EPI_ISL_9533284, EPI_ISL_9533289, EPI_ISL_9533290, EPI_ISL_9533293, EPI_ISL_9533305, EPI_ISL_9533307, EPI_ISL_9533353, EPI_ISL_9533417, EPI_ISL_9533418, EPI_ISL_9533420, EPI_ISL_9533422, EPI_ISL_9533424, EPI_ISL_9533425, EPI_ISL_9533429, EPI_ISL_9533431, EPI_ISL_9533432, EPI_ISL_9533433 | see above                                                                      | Gandhi Medical College and Hospital (GMCH), Secunderabad                                                                                                                                                           |                                                                                                                                                                                                                                                                                                                                    | D.R.Manisha Rani; Dr.G.Sushma Rajya Lakshmi; Dr.K.Nagamani; Dr.Sunitha Pakalapaty                                                                                                                                                                                           |
| EPI_ISL_9376216, EPI_ISL_9376222                                                                                                                                                                                                                                                                                                                   | GeneMe Labs, ul. Potokowa 10A, 80-283 Gdańsk                                   | 1. Tricity SARS-CoV-2 sequencing consortium: University of Gdansk, Medical University of Gdansk, Vaxican Ltd., Invicta Ltd. 2. National Institute of Public Health - National Institute of Hygiene, Warsaw, Poland |                                                                                                                                                                                                                                                                                                                                    | Celina Cybulska; Karolina Gackowska; Katarzyna Groth; Katarzyna Zacharczuk; Krystyna Bienkowska Szewczyk; Lukasz Rabalski; Maciej Grzybek; Maciej Kosinski; Magdalena Nowakowska; Marcin Lubocki; Malgorzata Sadkowska-Todys; Tomasz Wolkowicz                              |
| EPI_ISL_9610234                                                                                                                                                                                                                                                                                                                                    | General Hospital, Bharuch                                                      | Gujarat Biotechnology Research Centre                                                                                                                                                                              | Akhilesh Modi; Apurvasinh Puvar; Bhadreshsinh Gohil; Chaitanya Joshi; Disha Vora; Janvi Raval; Jaykumar Rangani; Jyoti Vasava; Madhvi Joshi; Nimesh Patel; Nitin Savaliya; NitinShukla; Priyank Chavda; Ramesh Pandit; Roshani Mishra; Sonal Sharma; Tasnim Trivedi; Zarna Patel                                                   |                                                                                                                                                                                                                                                                             |
| EPI_ISL_9604295, EPI_ISL_9604304                                                                                                                                                                                                                                                                                                                   | General Hospital, Morbi                                                        | Gujarat Biotechnology Research Centre                                                                                                                                                                              | Akhilesh Modi; Apurvasinh Puvar; Bhadreshsinh Gohil; Chaitanya Joshi; Disha Vora; Janvi Raval; Jaykumar Rangani; Kapil Bavarya; Madhvi Joshi; Nimesh Patel; Nitin Savaliya; NitinShukla; Priyank Chavda; Ramesh Pandit; Roshani Mishra; Sonal Sharma; Tasnim Trivedi; Zarna Patel                                                  |                                                                                                                                                                                                                                                                             |
| EPI_ISL_8885499, EPI_ISL_9402981, EPI_ISL_9402982, EPI_ISL_9402983, EPI_ISL_9610180                                                                                                                                                                                                                                                                | Genexplore Diagnostic center, Ahmedabad                                        | Gujarat Biotechnology Research Centre                                                                                                                                                                              | Akhilesh Modi; Apurvasinh Puvar; Ashish Patel; Bhadreshsinh Gohil; Chaitanya Joshi; Disha Vora; Janvi Raval; Jaykumar Rangani; Madhvi Joshi; Nimesh Patel; Nitin Savaliya; Nitin Shukla; NitinShukla; Priyank Chavda; Ramesh Pandit; Roshani Mishra; Sonal Sharma; Tasnim Trivedi; Zarna Patel                                     |                                                                                                                                                                                                                                                                             |
| EPI_ISL_9236261, EPI_ISL_9236263, EPI_ISL_9403009, EPI_ISL_9403010, EPI_ISL_9403011, EPI_ISL_9403012, EPI_ISL_9403013, EPI_ISL_9604301, EPI_ISL_9610226, EPI_ISL_9612705, EPI_ISL_9612706, EPI_ISL_9696305, EPI_ISL_9696308, EPI_ISL_9775200                                                                                                       | see above                                                                      | Government Medical College, Surat                                                                                                                                                                                  | Akhilesh Modi; Apurvasinh Puvar; Bhadreshsinh Gohil; Chaitanya Joshi; Disha Vora; Janvi Raval; Jaykumar Rangani; Madhvi Joshi; Netta Khandelwal; Nimesh Patel; Nitin Savaliya; Nitin Shukla; NitinShukla; Priyank Chavda; Ramesh Pandit; Roshani Mishra; Sonal Sharma; Tasnim Trivedi; Zarna Patel                                 |                                                                                                                                                                                                                                                                             |
| EPI_ISL_9610207, EPI_ISL_9610208                                                                                                                                                                                                                                                                                                                   | Green Cross Genetics Lab Pvt Ltd, Ahmedabad                                    | Gujarat Biotechnology Research Centre                                                                                                                                                                              | Akhilesh Modi; Apurvasinh Puvar; Bhadreshsinh Gohil; Chaitanya Joshi; Disha Vora; Janvi Raval; Jaykumar Rangani; Madhvi Joshi; Nimesh Patel; Nitin Savaliya; NitinShukla; Priyank Chavda; Ramesh Pandit; Roshani Mishra; Sonal Sharma; Tasnim Trivedi; Umang Patel; Zarna Patel                                                    |                                                                                                                                                                                                                                                                             |
| EPI_ISL_9612699                                                                                                                                                                                                                                                                                                                                    | Gujarat Adani Institute of Medical Sciences, Bhuj, Gujarat                     | Gujarat Biotechnology Research Centre                                                                                                                                                                              | Akhilesh Modi; Apurvasinh Puvar; Bhadreshsinh Gohil; Chaitanya Joshi; Disha Vora; Hitesh; Janvi Raval; Jaykumar Rangani; Madhvi Joshi; Nimesh Patel; Nitin Savaliya; NitinShukla; Priyank Chavda; Ramesh Pandit; Roshani Mishra; Sonal Sharma; Tasnim Trivedi; Zarna Patel                                                         |                                                                                                                                                                                                                                                                             |
| EPI_ISL_9300774, EPI_ISL_9300775                                                                                                                                                                                                                                                                                                                   | H Vila Franca Xira                                                             | Instituto Nacional de Saude (INSA)                                                                                                                                                                                 |                                                                                                                                                                                                                                                                                                                                    | Borges et al                                                                                                                                                                                                                                                                |
| EPI_ISL_9508880                                                                                                                                                                                                                                                                                                                                    | HELISA                                                                         | 1. Academic Center for Pathomorphological and Genetic-Molecular Diagnostics Ltd, Białystok, Poland<br>2. National Institute of Public Health - National Institute of Hygiene, Warsaw, Poland                       |                                                                                                                                                                                                                                                                                                                                    | Anetta Sulewska; Jacek Nikiłski; Janusz Dzieciol; Joanna Kiśluk; Katarzyna Zacharczuk; Konrad Raczkowski; Magdalena Nowakowska; Malgorzata Sadkowska-Todys; Piotr Karabowicz; Piotr Majewski; Przemyslaw Biecek; Joanna Reszeć; Radoslaw Charkiewicz; Tomasz Wolkowicz      |
| EPI_ISL_9598746                                                                                                                                                                                                                                                                                                                                    | HOPITAL ROBERT BOULIN                                                          | CNR Virus des Infections Respiratoires - France SUD                                                                                                                                                                |                                                                                                                                                                                                                                                                                                                                    | Antonin Bal; Bruno Lina; Bruno Simon; Gregory Destras; Gwendolynne Burfin; Hadrien Regue; Laurence Josset; Martine Valette; Quentin Semanas; Theophile Boyer                                                                                                                |
| EPI_ISL_9251073                                                                                                                                                                                                                                                                                                                                    | HOSPITAL UNIVERSITARIO CENTRAL DE ASTURIAS                                     | HOSPITAL UNIVERSITARIO CENTRAL DE ASTURIAS                                                                                                                                                                         |                                                                                                                                                                                                                                                                                                                                    | ; Alba L; Alvarez-Arguelles ME; Boga JA; Costales I; Coto E; González-Alba JM; Gómez de Oña J; Martín-Rodríguez G; Melón S; Perez-Martínez Z; Rojo S; Sandoval M                                                                                                            |
| EPI_ISL_9015802, EPI_ISL_9320294, EPI_ISL_9320326, EPI_ISL_9320350                                                                                                                                                                                                                                                                                 | HOSPITAL UNIVERSITARIO SON ESPASES                                             | HOSPITAL UNIVERSITARIO SON ESPASES                                                                                                                                                                                 |                                                                                                                                                                                                                                                                                                                                    | Dr. Antonio Oliver; Dr. Carla López-Causapé; Dr. Gabriel Cabot; Hospital Universitario Son Espases; on behalf of Servicio de Microbiología                                                                                                                                  |
| EPI_ISL_9698460                                                                                                                                                                                                                                                                                                                                    | Hannover Medical School, Institute of Virology                                 | Hannover Medical School, Institute of Virology                                                                                                                                                                     |                                                                                                                                                                                                                                                                                                                                    | Lars Steinbrück                                                                                                                                                                                                                                                             |
| EPI_ISL_9019573, EPI_ISL_9066885, EPI_ISL_9067198, EPI_ISL_9114755, EPI_ISL_9114840, EPI_ISL_9119006, EPI_ISL_9119137, EPI_ISL_9119281, EPI_ISL_9119385                                                                                                                                                                                            | see above                                                                      | Health Services Laboratories                                                                                                                                                                                       | Wellcome Sanger Institute for the COVID-19 Genomics UK (COG-UK) Consortium                                                                                                                                                                                                                                                         | Cordelia Langford; David K. Jackson; Dominic Kwiatkowski; Ewan Harrison; Health Services Laboratories and Alex Alderton; Ian Johnston; Jeffrey Barrett; John Sillitoe on behalf of the Wellcome Sanger Institute COVID-19 Surveillance Team; Roberto Amato; Sonia Goncalves |
| EPI_ISL_9374815, EPI_ISL_9576499, EPI_ISL_9576997, EPI_ISL_9577098, EPI_ISL_9577099                                                                                                                                                                                                                                                                | Helix                                                                          | Centers for Disease Control and Prevention Division of Viral Diseases, Pathogen Discovery                                                                                                                          | Benjamin Rambo-Martin; Christopher Gulvick; Clinton Paden; Dakota Howard; Dhvani Batra; Duncan MacCannell; Erisa Sula; Helix CA; Jason Caravas; Kristine Lacek; Matthew Schmeer; Peter Cook; Scott Sammons; Shatavia Morrison; Tymeckia Kendall; Victoria Caban Figueroa; Yvette Uoarumhi                                          |                                                                                                                                                                                                                                                                             |
| EPI_ISL_8880084                                                                                                                                                                                                                                                                                                                                    | Hong Kong Health Check & Medical Diagnostic Group Limited                      | Hong Kong Department of Health                                                                                                                                                                                     |                                                                                                                                                                                                                                                                                                                                    | Alan K.L. Tsang; Edman T.K. Lam; Ken H.L. Ng; Patricia K. L. Leung; Peter C.W. Yip; Rickjason C.W. Chan                                                                                                                                                                     |
| EPI_ISL_9612362, EPI_ISL_9612365, EPI_ISL_9612518, EPI_ISL_9612523                                                                                                                                                                                                                                                                                 | Hopital                                                                        | National Reference Center for Viruses of Respiratory Infections, Institut Pasteur, Paris                                                                                                                           | Angela Brisebarre; Béatrice LESIMPLE; Camille Capel; Christophe Malabat; Corinne Maufrais; David GIRARD; Etienne Simon-Lorière; Frédéric Lemoine; Julien Fumey; Louise Lefrançois; Marion Barbet; Maud Vanpeene; Méline Bizard; Slim El Khari; Sylvie Behillil; Sylvie Van der Werf; Vincent Enouf                                 |                                                                                                                                                                                                                                                                             |
| EPI_ISL_9616691                                                                                                                                                                                                                                                                                                                                    | Hopitaux Robert Schuman                                                        | Laboratoire national de sante, Microbiology, Microbial Genomics Platform                                                                                                                                           |                                                                                                                                                                                                                                                                                                                                    | Alain Hakim; Anke Wienecke-Baldacchino; Catherine Ragimbeau; Elodie Solarino; Fatu Djabi; Jessica Tapp; Lise Pignon; Nawfal Faik; Raoul Salmon; Sibel Berger; Tamir Abdelrahman; Virginie Jover                                                                             |
| EPI_ISL_9616686                                                                                                                                                                                                                                                                                                                                    | Hospital Center Luxembourg                                                     | Laboratoire national de sante, Microbiol., Microbial Genomics Platform                                                                                                                                             |                                                                                                                                                                                                                                                                                                                                    | Anke Wienecke-Baldacchino; Catherine Ragimbeau; Elodie Solarino; Fatu Djabi; Jean-Hugues Francois; Jessica Tapp; Lise Pignon; Michel Kohnen; Raoul Salmon; Tamir Abdelrahman; Virginie Jover; sibel Berger                                                                  |
| EPI_ISL_9480699                                                                                                                                                                                                                                                                                                                                    | Hospital of Southern Norway - Kristiansand, Department of Medical Microbiology | Norwegian Institute of Public Health, Department of Virology                                                                                                                                                       | Atiya R Ali; Debech Nadia; Engebretsen Serina Beate; Garcia Llorente Ignacio; Hilde Elshaug; Hilde Nordby Falkenhaus; Hilde Vollan; Jon Bråte; Kamilla Heddeland Inestefjord; Karoline Bragstad; Kathrine Stene-Johansen; Line Victoria Moen; Marie Paulsen Madsen; Olav Hungenes; Pedersen Benedikte Nevjen; Rasmus Riis Kopperud |                                                                                                                                                                                                                                                                             |
| EPI_ISL_9604742                                                                                                                                                                                                                                                                                                                                    | Hôpital Robert Schuman-Laboratoire                                             | Department of Virology, Henri Mondor University Hospital, Assistance Publique Hôpitaux de Paris, Université Paris-Est Créteil, INSERM U955                                                                         |                                                                                                                                                                                                                                                                                                                                    | Alexandre Soulier; Christophe Rodriguez; Elisabeth Trawinski; Guillaume Gricourt; Jean-Michel Pawlowsky; Melissa N'Debi; Slim Fourati; Vanessa Demontant                                                                                                                    |
| EPI_ISL_9419531, EPI_ISL_9419532, EPI_ISL_9494968, EPI_ISL_9494969, EPI_ISL_9494970, EPI_ISL_9494971, EPI_ISL_9494972, EPI_ISL_9494973, EPI_ISL_9494974, EPI_ISL_9494980, EPI_ISL_9494981, EPI_ISL_9494995, EPI_ISL_9495007, EPI_ISL_9495012, EPI_ISL_9495013, EPI_ISL_9495014, EPI_ISL_9495022                                                    | see above                                                                      | ICMR-National Institute of Virology - INSACOG                                                                                                                                                                      | NIV Influenza                                                                                                                                                                                                                                                                                                                      | Dr. Varsha Potdar and NIC Team                                                                                                                                                                                                                                              |
| EPI_ISL_9234860, EPI_ISL_9234867                                                                                                                                                                                                                                                                                                                   | IDSP, Jorhat                                                                   | Centre for Infectious Diseases, CSIR-NEIST                                                                                                                                                                         |                                                                                                                                                                                                                                                                                                                                    | G Narahari Sastry; Gayatri Gogoi; Jatin Kalita; Moirangthem G Singh; Munmi Bora; Pankaj Bharali; Romi Wahengbam; Yasmin B Tapaddar                                                                                                                                          |
| EPI_ISL_9234780, EPI_ISL_9234786, EPI_ISL_9234787, EPI_ISL_9234788, EPI_ISL_9234789, EPI_ISL_9234795, EPI_ISL_9234796, EPI_ISL_9234797, EPI_ISL_9234798, EPI_ISL_9234800                                                                                                                                                                           | see above                                                                      | IDSP, Kamrup Metro                                                                                                                                                                                                 | Centre for Infectious Diseases, CSIR-NEIST                                                                                                                                                                                                                                                                                         | G Narahari Sastry; Gayatri Gogoi; Jatin Kalita; Moirangthem G Singh; Munmi Bora; Pankaj Bharali; Romi Wahengbam; Yasmin B Tapaddar                                                                                                                                          |
| EPI_ISL_9494210                                                                                                                                                                                                                                                                                                                                    | IMC Lab                                                                        | National Institute of Health Research and Development                                                                                                                                                              |                                                                                                                                                                                                                                                                                                                                    | Arie Ardiansyah Nugraha; Fajar Nur Sulistyohadi; Hana Apsari Pawestri; Hartanti Dian Ikawati; Kartika Dewi Puspa; Nelly Puspandari; Nur Ika Hariastuti; Putri Widia; Subangkit; Vivi Setiawaty                                                                              |
| EPI_ISL_9456688, EPI_ISL_9456753, EPI_ISL_9456783, EPI_ISL_9456812                                                                                                                                                                                                                                                                                 | IMD Labor Frankfurt                                                            | Robert Koch Institute                                                                                                                                                                                              |                                                                                                                                                                                                                                                                                                                                    |                                                                                                                                                                                                                                                                             |
| EPI_ISL_9598771, EPI_ISL_9598884                                                                                                                                                                                                                                                                                                                   | INSTITUT BERGONIE                                                              | CNR Virus des Infections Respiratoires - France SUD                                                                                                                                                                |                                                                                                                                                                                                                                                                                                                                    | Antonin Bal; Bruno Lina; Bruno Simon; Gregory Destras; Gwendolynne Burfin; Hadrien Regue; Laurence Josset; Martine Valette; Quentin Semanas; Theophile Boyer                                                                                                                |
| EPI_ISL_9604309, EPI_ISL_9604310, EPI_ISL_9604322                                                                                                                                                                                                                                                                                                  | In Vitro Speciality Laboratory, Ahmedabad                                      | Gujarat Biotechnology Research Centre                                                                                                                                                                              | Akhilesh Modi; Apurvasinh Puvar; Bhadreshsinh Gohil; Chaitanya Joshi; Disha Vora; Janvi Raval; Jaykumar Rangani; Madhvi Joshi; Mala; Naresh Laddha; Nimesh Patel; Nitin Savaliya; NitinShukla; Priyank Chavda; Ramesh Pandit; Roshani Mishra; Sonal Sharma; Tasnim Trivedi; Zarna Patel                                            |                                                                                                                                                                                                                                                                             |
| EPI_ISL_9528120, EPI_ISL_9528122, EPI_ISL_9528124, EPI_ISL_9528127, EPI_ISL_9528128, EPI_ISL_9528129, EPI_ISL_9528131, EPI_ISL_9528134, EPI_ISL_9528136, EPI_ISL_9528139, EPI_ISL_9528140, EPI_ISL_9528144, EPI_ISL_9528145                                                                                                                        |                                                                                |                                                                                                                                                                                                                    |                                                                                                                                                                                                                                                                                                                                    |                                                                                                                                                                                                                                                                             |

|                                                                                                                                                                                                                                                                                                                                                                                                                                                                                                                                                   |                                                                                                     |                                                                                                                                                                                                                      |                                                                                                                                                                                                                                                                                                                                                                               |
|---------------------------------------------------------------------------------------------------------------------------------------------------------------------------------------------------------------------------------------------------------------------------------------------------------------------------------------------------------------------------------------------------------------------------------------------------------------------------------------------------------------------------------------------------|-----------------------------------------------------------------------------------------------------|----------------------------------------------------------------------------------------------------------------------------------------------------------------------------------------------------------------------|-------------------------------------------------------------------------------------------------------------------------------------------------------------------------------------------------------------------------------------------------------------------------------------------------------------------------------------------------------------------------------|
| see above                                                                                                                                                                                                                                                                                                                                                                                                                                                                                                                                         | Indira Gandhi Memorial Hospital                                                                     | Indira Gandhi Memorial Hospital                                                                                                                                                                                      | D. Fathmah Nazla Rafeeq; Dr. Ibrahim Afzal; Mr. Ibrahim Nishan Ahmed; Ms. Aishath Shuhudha; Ms. Aminath Shaazleena Abdul Rahman; Ms. Soafy Mohamed                                                                                                                                                                                                                            |
| EPI_ISL_9386075, EPI_ISL_9623133, EPI_ISL_9666613, EPI_ISL_9666641, EPI_ISL_9666740                                                                                                                                                                                                                                                                                                                                                                                                                                                               | Infinity Biologix                                                                                   | Centers for Disease Control and Prevention Division of Viral Diseases, Pathogen Discovery                                                                                                                            | Benjamin Rambo-Martin; Chirayu Goswami; Christian Bixby; Christopher Gulvick; Clinton Paden; Dakota Howard; Dhvani Batra; Duncan MacCannell; Erisa Sula; Jason Caravas; Jonathan Schultz; Kristine Lacek; Matthew Schmeerer; Peter Cook; Robin Grimwood; Russ Hager; Scott Sammons; Shatavia Morrison; Tymeckia Kendall; Victoria Caban Figueroa; Yihe Wang; Yvette Unoarumhi |
| EPI_ISL_9225558                                                                                                                                                                                                                                                                                                                                                                                                                                                                                                                                   | Institut für Hygiene und Umwelt Hamburg                                                             | Robert Koch Institute                                                                                                                                                                                                |                                                                                                                                                                                                                                                                                                                                                                               |
| EPI_ISL_9210118                                                                                                                                                                                                                                                                                                                                                                                                                                                                                                                                   | Institut für Klinische Transfusionsmedizin und Immunogenetik DRK Blutspendedienst Baden-Württemberg | Robert Koch Institute                                                                                                                                                                                                |                                                                                                                                                                                                                                                                                                                                                                               |
| EPI_ISL_9257463, EPI_ISL_9257502                                                                                                                                                                                                                                                                                                                                                                                                                                                                                                                  | Institute for Infectious Diseases                                                                   | Institute for Infectious Diseases, University of Bern                                                                                                                                                                | Alban Ramette; Christian Baumann; Cora Sägesser; Franziska Suter-Riniker; Loïc Borcard; Miguel A Terrazos Miani; Nicole Liechti; Pascal Bittel; Peter Keller; Sonja Gempeler; Stefan Neuschwander; Stephen L Leib                                                                                                                                                             |
| EPI_ISL_9459540                                                                                                                                                                                                                                                                                                                                                                                                                                                                                                                                   | Institute for Water Quality and Resource Management, Technical University Vienna                    | Bergthaler laboratory, CeMM Research Center for Molecular Medicine of the Austrian Academy of Sciences                                                                                                               | Andreas Bergthaler; Anna Schedl; Bekir Erguner; Benedikt Agerer; Christoph Bock; Fabian Amman; Jan Laine; Lukas Endler; Martin Senekowitsch; Matthew Thornton; Michael Schuster; Michelle Chan; Petr Triska; Thomas Penz                                                                                                                                                      |
| EPI_ISL_9324096, EPI_ISL_9324123                                                                                                                                                                                                                                                                                                                                                                                                                                                                                                                  | Institute of Virology, Medical Center, University of Freiburg, Freiburg, Germany                    | Institute of Virology, Clinical Virus Genomics, Medical Center, University of Freiburg, Freiburg, Germany                                                                                                            | Jonas Fuchs; Lena Jaki; Lisa Gutbrod; Marcus Panning                                                                                                                                                                                                                                                                                                                          |
| EPI_ISL_9337798                                                                                                                                                                                                                                                                                                                                                                                                                                                                                                                                   | Instituto Nacional de Medicina Genomica                                                             | Instituto Nacional de Medicina Genomica                                                                                                                                                                              | Cedro-Tanda A; Escobar-Arrazola MA; Garnica-Lopez Dora; Herrera-Montalvo LA.; Hidalgo-Miranda A; Mendoza-Vargas A; Ramirez-Vega O; Rangel-DeLeon D; Reyes-Grajeda JP; Yair Alfaro-Mora                                                                                                                                                                                        |
| EPI_ISL_9392215, EPI_ISL_9392217, EPI_ISL_9392228                                                                                                                                                                                                                                                                                                                                                                                                                                                                                                 | Institut Genetyki Sądowej Sp. z o.o.                                                                | 1. Tricity SARS-CoV-2 sequencing consortium: University of Gdansk, Medical University of Gdansk, Vaxican Ltd., Invicta Ltd. 2. National Institute of Public Health - National Institute of Hygiene, Warsaw, Poland   | Celina Cybulska; Karolina Gackowska; Katarzyna Groth; Katarzyna Zacharczuk; Krystyna Bienkowska Szewczyk; Lukasz Rabalski; Maciej Grzybek; Maciej Kosinski; Magdalena Nowakowska; Marcin Lubocki; Małgorzata Sadkowska-Todys; Tomasz Wołkowicz                                                                                                                                |
| EPI_ISL_9706218                                                                                                                                                                                                                                                                                                                                                                                                                                                                                                                                   | Institut Genetyki Sądowej Sp. z o.o.                                                                | 573. Tricity SARS-CoV-2 sequencing consortium: University of Gdansk, Medical University of Gdansk, Vaxican Ltd., Invicta Ltd. 2. National Institute of Public Health - National Institute of Hygiene, Warsaw, Poland | Celina Cybulska; Karolina Gackowska; Katarzyna Groth; Katarzyna Zacharczuk; Krystyna Bienkowska Szewczyk; Lukasz Rabalski; Maciej Grzybek; Maciej Kosinski; Magdalena Nowakowska; Marcin Lubocki; Małgorzata Sadkowska-Todys; Tomasz Wołkowicz                                                                                                                                |
| EPI_ISL_9706234                                                                                                                                                                                                                                                                                                                                                                                                                                                                                                                                   | Institut Genetyki Sądowej Sp. z o.o.                                                                | 590. Tricity SARS-CoV-2 sequencing consortium: University of Gdansk, Medical University of Gdansk, Vaxican Ltd., Invicta Ltd. 2. National Institute of Public Health - National Institute of Hygiene, Warsaw, Poland | Celina Cybulska; Karolina Gackowska; Katarzyna Groth; Katarzyna Zacharczuk; Krystyna Bienkowska Szewczyk; Lukasz Rabalski; Maciej Grzybek; Maciej Kosinski; Magdalena Nowakowska; Marcin Lubocki; Małgorzata Sadkowska-Todys; Tomasz Wołkowicz                                                                                                                                |
| EPI_ISL_9706236                                                                                                                                                                                                                                                                                                                                                                                                                                                                                                                                   | Institut Genetyki Sądowej Sp. z o.o.                                                                | 592. Tricity SARS-CoV-2 sequencing consortium: University of Gdansk, Medical University of Gdansk, Vaxican Ltd., Invicta Ltd. 2. National Institute of Public Health - National Institute of Hygiene, Warsaw, Poland | Celina Cybulska; Karolina Gackowska; Katarzyna Groth; Katarzyna Zacharczuk; Krystyna Bienkowska Szewczyk; Lukasz Rabalski; Maciej Grzybek; Maciej Kosinski; Magdalena Nowakowska; Marcin Lubocki; Małgorzata Sadkowska-Todys; Tomasz Wołkowicz                                                                                                                                |
| EPI_ISL_9706253                                                                                                                                                                                                                                                                                                                                                                                                                                                                                                                                   | Institut Genetyki Sądowej Sp. z o.o.                                                                | 610. Tricity SARS-CoV-2 sequencing consortium: University of Gdansk, Medical University of Gdansk, Vaxican Ltd., Invicta Ltd. 2. National Institute of Public Health - National Institute of Hygiene, Warsaw, Poland | Celina Cybulska; Karolina Gackowska; Katarzyna Groth; Katarzyna Zacharczuk; Krystyna Bienkowska Szewczyk; Lukasz Rabalski; Maciej Grzybek; Maciej Kosinski; Magdalena Nowakowska; Marcin Lubocki; Małgorzata Sadkowska-Todys; Tomasz Wołkowicz                                                                                                                                |
| EPI_ISL_9706257                                                                                                                                                                                                                                                                                                                                                                                                                                                                                                                                   | Institut Genetyki Sądowej Sp. z o.o.                                                                | 614. Tricity SARS-CoV-2 sequencing consortium: University of Gdansk, Medical University of Gdansk, Vaxican Ltd., Invicta Ltd. 2. National Institute of Public Health - National Institute of Hygiene, Warsaw, Poland | Celina Cybulska; Karolina Gackowska; Katarzyna Groth; Katarzyna Zacharczuk; Krystyna Bienkowska Szewczyk; Lukasz Rabalski; Maciej Grzybek; Maciej Kosinski; Magdalena Nowakowska; Marcin Lubocki; Małgorzata Sadkowska-Todys; Tomasz Wołkowicz                                                                                                                                |
| EPI_ISL_9706260                                                                                                                                                                                                                                                                                                                                                                                                                                                                                                                                   | Institut Genetyki Sądowej Sp. z o.o.                                                                | 617. Tricity SARS-CoV-2 sequencing consortium: University of Gdansk, Medical University of Gdansk, Vaxican Ltd., Invicta Ltd. 2. National Institute of Public Health - National Institute of Hygiene, Warsaw, Poland | Celina Cybulska; Karolina Gackowska; Katarzyna Groth; Katarzyna Zacharczuk; Krystyna Bienkowska Szewczyk; Lukasz Rabalski; Maciej Grzybek; Maciej Kosinski; Magdalena Nowakowska; Marcin Lubocki; Małgorzata Sadkowska-Todys; Tomasz Wołkowicz                                                                                                                                |
| EPI_ISL_9706273                                                                                                                                                                                                                                                                                                                                                                                                                                                                                                                                   | Institut Genetyki Sądowej Sp. z o.o.                                                                | 630. Tricity SARS-CoV-2 sequencing consortium: University of Gdansk, Medical University of Gdansk, Vaxican Ltd., Invicta Ltd. 2. National Institute of Public Health - National Institute of Hygiene, Warsaw, Poland | Celina Cybulska; Karolina Gackowska; Katarzyna Groth; Katarzyna Zacharczuk; Krystyna Bienkowska Szewczyk; Lukasz Rabalski; Maciej Grzybek; Maciej Kosinski; Magdalena Nowakowska; Marcin Lubocki; Małgorzata Sadkowska-Todys; Tomasz Wołkowicz                                                                                                                                |
| EPI_ISL_9706274                                                                                                                                                                                                                                                                                                                                                                                                                                                                                                                                   | Institut Genetyki Sądowej Sp. z o.o.                                                                | 631. Tricity SARS-CoV-2 sequencing consortium: University of Gdansk, Medical University of Gdansk, Vaxican Ltd., Invicta Ltd. 2. National Institute of Public Health - National Institute of Hygiene, Warsaw, Poland | Celina Cybulska; Karolina Gackowska; Katarzyna Groth; Katarzyna Zacharczuk; Krystyna Bienkowska Szewczyk; Lukasz Rabalski; Maciej Grzybek; Maciej Kosinski; Magdalena Nowakowska; Marcin Lubocki; Małgorzata Sadkowska-Todys; Tomasz Wołkowicz                                                                                                                                |
| EPI_ISL_9706291                                                                                                                                                                                                                                                                                                                                                                                                                                                                                                                                   | Institut Genetyki Sądowej Sp. z o.o.                                                                | 648. Tricity SARS-CoV-2 sequencing consortium: University of Gdansk, Medical University of Gdansk, Vaxican Ltd., Invicta Ltd. 2. National Institute of Public Health - National Institute of Hygiene, Warsaw, Poland | Celina Cybulska; Karolina Gackowska; Katarzyna Groth; Katarzyna Zacharczuk; Krystyna Bienkowska Szewczyk; Lukasz Rabalski; Maciej Grzybek; Maciej Kosinski; Magdalena Nowakowska; Marcin Lubocki; Małgorzata Sadkowska-Todys; Tomasz Wołkowicz                                                                                                                                |
| EPI_ISL_9706292                                                                                                                                                                                                                                                                                                                                                                                                                                                                                                                                   | Institut Genetyki Sądowej Sp. z o.o.                                                                | 649. Tricity SARS-CoV-2 sequencing consortium: University of Gdansk, Medical University of Gdansk, Vaxican Ltd., Invicta Ltd. 2. National Institute of Public Health - National Institute of Hygiene, Warsaw, Poland | Celina Cybulska; Karolina Gackowska; Katarzyna Groth; Katarzyna Zacharczuk; Krystyna Bienkowska Szewczyk; Lukasz Rabalski; Maciej Grzybek; Maciej Kosinski; Magdalena Nowakowska; Marcin Lubocki; Małgorzata Sadkowska-Todys; Tomasz Wołkowicz                                                                                                                                |
| EPI_ISL_9706304                                                                                                                                                                                                                                                                                                                                                                                                                                                                                                                                   | Institut Genetyki Sądowej Sp. z o.o.                                                                | 662. Tricity SARS-CoV-2 sequencing consortium: University of Gdansk, Medical University of Gdansk, Vaxican Ltd., Invicta Ltd. 2. National Institute of Public Health - National Institute of Hygiene, Warsaw, Poland | Celina Cybulska; Karolina Gackowska; Katarzyna Groth; Katarzyna Zacharczuk; Krystyna Bienkowska Szewczyk; Lukasz Rabalski; Maciej Grzybek; Maciej Kosinski; Magdalena Nowakowska; Marcin Lubocki; Małgorzata Sadkowska-Todys; Tomasz Wołkowicz                                                                                                                                |
| EPI_ISL_9024168, EPI_ISL_9062362, EPI_ISL_9062537, EPI_ISL_9066857, EPI_ISL_9067038, EPI_ISL_9071400, EPI_ISL_9071438, EPI_ISL_9072193, EPI_ISL_9073678, EPI_ISL_9073747, EPI_ISL_9112086, EPI_ISL_9118869, EPI_ISL_9124634, EPI_ISL_9128985, EPI_ISL_9175775, EPI_ISL_9276121, EPI_ISL_9276207                                                                                                                                                                                                                                                   | Integrated Covid Hub North East                                                                     | Wellcome Sanger Institute for the COVID-19 Genomics UK (COG-UK) Consortium                                                                                                                                           | Cordelia Langford; David K. Jackson; Dominic Kwiatkowski; Ewan Harrison; Ian Johnston; Integrated Covid Hub North East and Alex Alderton; Jeffrey Barrett; John Sillitoe on behalf of the Wellcome Sanger Institute COVID-19 Surveillance Team; Roberto Amato; Sonia Goncalves                                                                                                |
| EPI_ISL_8931322                                                                                                                                                                                                                                                                                                                                                                                                                                                                                                                                   | Iressef Genomics lab                                                                                | IRRESSEF                                                                                                                                                                                                             | Abdou PADANE; Ambroise AHOUIDI; Aminata DIA; Aminata MBOUP; Astou Gaye GAYE; Barada Cisse; Birahim Piere NDIAYE; Cyrille Diehdou; Diabou Diagne; Gora LO; Khadim GUEYE; Moustapha MBOW; Nafisatou LEYE; Ndeye Coumba Toure KANE; Papa Alassane DIAW; Samba Ndiour; Seni Ndiaye; Souleymane MBOUP; Yacine DIA                                                                  |
| EPI_ISL_8919778                                                                                                                                                                                                                                                                                                                                                                                                                                                                                                                                   | IstitutoAuxologicoItaliano                                                                          | Istituto Auxologico Italiano                                                                                                                                                                                         | Erminio Torresani                                                                                                                                                                                                                                                                                                                                                             |
| EPI_ISL_8903524                                                                                                                                                                                                                                                                                                                                                                                                                                                                                                                                   | Jessa                                                                                               | Jessa                                                                                                                                                                                                                | Severine Berden et al. on behalf of the Jessa_cmdLab                                                                                                                                                                                                                                                                                                                          |
| EPI_ISL_9525802                                                                                                                                                                                                                                                                                                                                                                                                                                                                                                                                   | Johns Hopkins Hospital Department of Pathology                                                      | Johns Hopkins Hospital Department of Pathology                                                                                                                                                                       | Amory Fall; C. Paul Morris; Heba H. Mostafa; Julie M. Norton; Omar Abdullah; Raghdha Eldesouki                                                                                                                                                                                                                                                                                |
| EPI_ISL_9679626                                                                                                                                                                                                                                                                                                                                                                                                                                                                                                                                   | KIMBERLEY LABORATORY                                                                                | National Institute for Communicable Diseases of the National Health Laboratory Service                                                                                                                               | Amoako DG; Bhiman JN; Everatt J; Ismail A; Kekana D; Mahlangu B; Mnguni A; Mohale T; Ntuli N; Scheepers C; Wolter N                                                                                                                                                                                                                                                           |
| EPI_ISL_9758429                                                                                                                                                                                                                                                                                                                                                                                                                                                                                                                                   | Kaiser Permanente Southern California                                                               | Helix                                                                                                                                                                                                                | Helix; Kaiser Permanente Southern California                                                                                                                                                                                                                                                                                                                                  |
| EPI_ISL_9441449                                                                                                                                                                                                                                                                                                                                                                                                                                                                                                                                   | Kantonsspital Winterthur                                                                            | Institute of Medical Virology, University of Zurich                                                                                                                                                                  | Alexandra Trkola; Annette Audigé; Cyril Shah; Gabriela Ziltener; Guido Bloembergen; Jon Huder; Jürg Böni; Kevin Steiner; Maria Grünberg; Maryam Zaheri; Michael Huber; Riccarda Capaul; Stefan Schmutz; Verena Kufner                                                                                                                                                         |
| EPI_ISL_9259305, EPI_ISL_9259313, EPI_ISL_9259317, EPI_ISL_9259324, EPI_ISL_9259336, EPI_ISL_9259340, EPI_ISL_9259349, EPI_ISL_9259355, EPI_ISL_9225866, EPI_ISL_922591, EPI_ISL_922617, EPI_ISL_922643, EPI_ISL_922654, EPI_ISL_922666, EPI_ISL_922718, EPI_ISL_922732, EPI_ISL_922742, EPI_ISL_922744, EPI_ISL_922749, EPI_ISL_922762, EPI_ISL_922765, EPI_ISL_922770, EPI_ISL_9522783, EPI_ISL_9522795, EPI_ISL_9522802, EPI_ISL_9522812, EPI_ISL_9522813, EPI_ISL_9522817, EPI_ISL_9522820, EPI_ISL_9522821, EPI_ISL_9522823, EPI_ISL_9622893 | Karolinska University Hospital Huddinge                                                             | Karolinska University Hospital                                                                                                                                                                                       | Annika Tiveljung Lindell; Henning Onsbiring; Jan Albert; Karina Hentrich; Lynda Eneh; Maria Ropat; Martin Ekman; Natalija Gerasimcik; Robert Drydak; Sandra Broddesson; Shambhu Ganeshappa Aralaguppe; Tanja Normark; Tobias Allander; Valteri Wirta; Zhibing Yun                                                                                                             |
| see above                                                                                                                                                                                                                                                                                                                                                                                                                                                                                                                                         | Karolinska University Hospital Huddinge                                                             | Karolinska University Hospital                                                                                                                                                                                       | Annika Tiveljung Lindell; Henning Onsbiring; Jan Albert; Karina Hentrich; Lynda Eneh; Maria Ropat; Martin Ekman; Natalija Gerasimcik; Robert Drydak; Sandra Broddesson; Shambhu Ganeshappa Aralaguppe; Tanja Normark; Tobias Allander; Valteri Wirta; Zhibing Yun                                                                                                             |
| EPI_ISL_9522458, EPI_ISL_9522494, EPI_ISL_9522534, EPI_ISL_9523134, EPI_ISL_9523140, EPI_ISL_9523150, EPI_ISL_9523187, EPI_ISL_9523199, EPI_ISL_9523205, EPI_ISL_9523207, EPI_ISL_9523212, EPI_ISL_9523214, EPI_ISL_9523250, EPI_ISL_9523282, EPI_ISL_9523339, EPI_ISL_9523343, EPI_ISL_9523345, EPI_ISL_9523352                                                                                                                                                                                                                                  |                                                                                                     |                                                                                                                                                                                                                      |                                                                                                                                                                                                                                                                                                                                                                               |

|                                                                                                                                                                                                                                                                                                                                                                                                                                                                                                                                                                                 |                                                                                                           |                                                                                                                                                                                                                      |                                                                                                                                                                                                                                                                                                                                                                                                                                                                                                                                                                                                                                                                                                            |
|---------------------------------------------------------------------------------------------------------------------------------------------------------------------------------------------------------------------------------------------------------------------------------------------------------------------------------------------------------------------------------------------------------------------------------------------------------------------------------------------------------------------------------------------------------------------------------|-----------------------------------------------------------------------------------------------------------|----------------------------------------------------------------------------------------------------------------------------------------------------------------------------------------------------------------------|------------------------------------------------------------------------------------------------------------------------------------------------------------------------------------------------------------------------------------------------------------------------------------------------------------------------------------------------------------------------------------------------------------------------------------------------------------------------------------------------------------------------------------------------------------------------------------------------------------------------------------------------------------------------------------------------------------|
| see above                                                                                                                                                                                                                                                                                                                                                                                                                                                                                                                                                                       | Karolinska University Hospital Solna                                                                      | Karolinska University Hospital                                                                                                                                                                                       | Annika Tiveljung Lindell; Henning Onsbring; Jan Albert; Karina Hentrich; Lynda Eneh; Maria Ropat; Martin Ekman; Natalija Gerasimcik; Robert Dyrdak; Sandra Broddesson; Shambhu Ganeshappa Aralaguppe; Tanja Normark; Tobias Allander; Valteri Wirta; Zhibing Yun                                                                                                                                                                                                                                                                                                                                                                                                                                           |
| EPI_ISL_9512120, EPI_ISL_9512121, EPI_ISL_9512125, EPI_ISL_9512126, EPI_ISL_9512129, EPI_ISL_9512244, EPI_ISL_9512251, EPI_ISL_9512298, EPI_ISL_9512359                                                                                                                                                                                                                                                                                                                                                                                                                         |                                                                                                           |                                                                                                                                                                                                                      |                                                                                                                                                                                                                                                                                                                                                                                                                                                                                                                                                                                                                                                                                                            |
| see above                                                                                                                                                                                                                                                                                                                                                                                                                                                                                                                                                                       | Kasturba Hospital Molecular Lab - INSA COG                                                                | Kasturba hospital WGS                                                                                                                                                                                                | Jayanthi Shastri; Vidushi Chitalia                                                                                                                                                                                                                                                                                                                                                                                                                                                                                                                                                                                                                                                                         |
| EPI_ISL_9244120, EPI_ISL_9244121, EPI_ISL_9244122, EPI_ISL_9244209, EPI_ISL_9244210, EPI_ISL_9244211, EPI_ISL_9244212, EPI_ISL_9244213, EPI_ISL_9244214, EPI_ISL_9244215, EPI_ISL_9244217, EPI_ISL_9244227, EPI_ISL_9244312, EPI_ISL_9244333, EPI_ISL_9244334, EPI_ISL_9244335, EPI_ISL_9244343, EPI_ISL_9244427                                                                                                                                                                                                                                                                |                                                                                                           |                                                                                                                                                                                                                      |                                                                                                                                                                                                                                                                                                                                                                                                                                                                                                                                                                                                                                                                                                            |
| see above                                                                                                                                                                                                                                                                                                                                                                                                                                                                                                                                                                       | King George's Medical University                                                                          | CSIR-National Botanical Research Institute                                                                                                                                                                           | Amita Jain; Babita; Priti Prasad; Samir V Sawant; Shantanu Prakash; Sumit K Bag; Suruchi Shukla; Tripti Rungta                                                                                                                                                                                                                                                                                                                                                                                                                                                                                                                                                                                             |
| EPI_ISL_9110766, EPI_ISL_9221566, EPI_ISL_9221727, EPI_ISL_9221738, EPI_ISL_9221747, EPI_ISL_9221769, EPI_ISL_9221777, EPI_ISL_9223955, EPI_ISL_9223975, EPI_ISL_9223979                                                                                                                                                                                                                                                                                                                                                                                                        |                                                                                                           |                                                                                                                                                                                                                      |                                                                                                                                                                                                                                                                                                                                                                                                                                                                                                                                                                                                                                                                                                            |
| see above                                                                                                                                                                                                                                                                                                                                                                                                                                                                                                                                                                       | Klinikum Ernst von Bergmann gemeinnützige GmbH - stationärer Bereich                                      | Robert Koch Institute                                                                                                                                                                                                |                                                                                                                                                                                                                                                                                                                                                                                                                                                                                                                                                                                                                                                                                                            |
| EPI_ISL_9456822                                                                                                                                                                                                                                                                                                                                                                                                                                                                                                                                                                 | Klinikum der Stadt Ludwigshafen - Institut für Labordiagnostik Hygiene und Transfusionsmedizin            | Robert Koch Institute                                                                                                                                                                                                |                                                                                                                                                                                                                                                                                                                                                                                                                                                                                                                                                                                                                                                                                                            |
| EPI_ISL_9412305, EPI_ISL_9412306                                                                                                                                                                                                                                                                                                                                                                                                                                                                                                                                                | Klinisch Laboratorium ZNA                                                                                 | Klinisch Laboratorium ZNA                                                                                                                                                                                            | Verstrepen et al.                                                                                                                                                                                                                                                                                                                                                                                                                                                                                                                                                                                                                                                                                          |
| EPI_ISL_9679214, EPI_ISL_9679243, EPI_ISL_9711771, EPI_ISL_9711780, EPI_ISL_9711781                                                                                                                                                                                                                                                                                                                                                                                                                                                                                             | Kuala Lumpur International Airport (KLIA) Health Office                                                   | Institute for Medical Research, Infectious Disease Research Centre, National Institutes of Health, Ministry of Health Malaysia                                                                                       | Ahmad FA; Ahmad Fazilah NA; Anasir MI; Azizan MA; Kamel K; Mohamad Sukri MZ; Norhisham SN; Ramly N; Robert F; Rosli NR; Suppiah J; Thayan R                                                                                                                                                                                                                                                                                                                                                                                                                                                                                                                                                                |
| EPI_ISL_9528102, EPI_ISL_9528103, EPI_ISL_9528104, EPI_ISL_9528105, EPI_ISL_9528107                                                                                                                                                                                                                                                                                                                                                                                                                                                                                             | Kulhudufushi Regional Hospital                                                                            | Kulhudufushi Regional Hospital                                                                                                                                                                                       | D. Fathmath Nazla Rafeeq; Dr. Ibrahim Afzal; Mr. Ibrahim Nishan Ahmed; Ms. Aishath Shuhudha; Ms. Aminath Shaazleena Abdal Rahman; Ms. Soafy Mohamed                                                                                                                                                                                                                                                                                                                                                                                                                                                                                                                                                        |
| EPI_ISL_9598965, EPI_ISL_9598988                                                                                                                                                                                                                                                                                                                                                                                                                                                                                                                                                | LABOFFICE                                                                                                 | CNR Virus des Infections Respiratoires - France SUD                                                                                                                                                                  | Antonin Bal; Bruno Lina; Bruno Simon; Gregory Destras; Gwendolynne Burfin; Hadrien Regue; Laurence Josset; Martine Valette; Quentin Semanas; Theophile Boyer                                                                                                                                                                                                                                                                                                                                                                                                                                                                                                                                               |
| EPI_ISL_9322159, EPI_ISL_9322192, EPI_ISL_9322206, EPI_ISL_9322234, EPI_ISL_9599990                                                                                                                                                                                                                                                                                                                                                                                                                                                                                             | LABORATOIRE CREAVALLEE                                                                                    | CNR Virus des Infections Respiratoires - France SUD                                                                                                                                                                  | Antonin Bal; Bruno Lina; Bruno Simon; Gregory Destras; Gwendolynne Burfin; Hadrien Regue; Laurence Josset; Martine Valette; Quentin Semanas; Theophile Boyer; Théophile Boyer                                                                                                                                                                                                                                                                                                                                                                                                                                                                                                                              |
| EPI_ISL_9457120, EPI_ISL_9457124, EPI_ISL_9457216, EPI_ISL_9457245, EPI_ISL_9457270, EPI_ISL_9457278, EPI_ISL_9457294, EPI_ISL_9457493, EPI_ISL_9457583, EPI_ISL_9457629, EPI_ISL_9457646, EPI_ISL_9457658, EPI_ISL_9457663, EPI_ISL_9457665, EPI_ISL_9457706, EPI_ISL_9457749, EPI_ISL_9457804, EPI_ISL_9457808, EPI_ISL_9457812, EPI_ISL_9457816, EPI_ISL_9457830, EPI_ISL_9457842, EPI_ISL_9457853, EPI_ISL_9457861, EPI_ISL_9457882, EPI_ISL_9457894, EPI_ISL_9458152, EPI_ISL_9458153, EPI_ISL_9458154, EPI_ISL_9458157, EPI_ISL_9458158, EPI_ISL_9458169, EPI_ISL_9458201 |                                                                                                           |                                                                                                                                                                                                                      |                                                                                                                                                                                                                                                                                                                                                                                                                                                                                                                                                                                                                                                                                                            |
| see above                                                                                                                                                                                                                                                                                                                                                                                                                                                                                                                                                                       | LADR Zentrallabor DR. Kramer & Kollegen Geesthacht                                                        | Robert Koch Institute                                                                                                                                                                                                |                                                                                                                                                                                                                                                                                                                                                                                                                                                                                                                                                                                                                                                                                                            |
| EPI_ISL_9599831, EPI_ISL_9599915, EPI_ISL_9795691                                                                                                                                                                                                                                                                                                                                                                                                                                                                                                                               | LAM BIO B6 SITE DE CHAUMONT                                                                               | CNR Virus des Infections Respiratoires - France SUD                                                                                                                                                                  | Antonin Bal; Bruno Lina; Bruno Simon; Gregory Destras; Gwendolynne Burfin; Hadrien Regue; Laurence Josset; Martine Valette; Quentin Semanas; Theophile Boyer                                                                                                                                                                                                                                                                                                                                                                                                                                                                                                                                               |
| EPI_ISL_9599480, EPI_ISL_9599502                                                                                                                                                                                                                                                                                                                                                                                                                                                                                                                                                | LAM BIOPOLE ORTHEZ                                                                                        | CNR Virus des Infections Respiratoires - France SUD                                                                                                                                                                  | Antonin Bal; Bruno Lina; Bruno Simon; Gregory Destras; Gwendolynne Burfin; Hadrien Regue; Laurence Josset; Martine Valette; Quentin Semanas; Theophile Boyer                                                                                                                                                                                                                                                                                                                                                                                                                                                                                                                                               |
| EPI_ISL_9402122, EPI_ISL_9402124, EPI_ISL_9402129, EPI_ISL_9402131, EPI_ISL_9402139                                                                                                                                                                                                                                                                                                                                                                                                                                                                                             | LANCET                                                                                                    | National Institute for Communicable Diseases of the National Health Laboratory Service                                                                                                                               | Amoako DG; Bhiman JN; Everatt J; Ismail A; Kekana D; Mahlangu B; Mnguni A; Mohale T; Ntuli N; Scheepers C; Wolter N                                                                                                                                                                                                                                                                                                                                                                                                                                                                                                                                                                                        |
| EPI_ISL_9599228                                                                                                                                                                                                                                                                                                                                                                                                                                                                                                                                                                 | LBM CHARENTE-MARITIME NORD                                                                                | CNR Virus des Infections Respiratoires - France SUD                                                                                                                                                                  | Antonin Bal; Bruno Lina; Bruno Simon; Gregory Destras; Gwendolynne Burfin; Hadrien Regue; Laurence Josset; Martine Valette; Quentin Semanas; Theophile Boyer                                                                                                                                                                                                                                                                                                                                                                                                                                                                                                                                               |
| EPI_ISL_9599118, EPI_ISL_9599163                                                                                                                                                                                                                                                                                                                                                                                                                                                                                                                                                | LX BIO                                                                                                    | CNR Virus des Infections Respiratoires - France SUD                                                                                                                                                                  | Antonin Bal; Bruno Lina; Bruno Simon; Gregory Destras; Gwendolynne Burfin; Hadrien Regue; Laurence Josset; Martine Valette; Quentin Semanas; Theophile Boyer                                                                                                                                                                                                                                                                                                                                                                                                                                                                                                                                               |
| EPI_ISL_9058504                                                                                                                                                                                                                                                                                                                                                                                                                                                                                                                                                                 | Lab. Microbiologia e Virologia Cotugno A.O. dei Colli                                                     | TIGEM                                                                                                                                                                                                                | Antonio Grimaldi Patrizia Annunziata Francesco Panariello Claudia Tiberio Teresa Giuliano Valentina Bouche Chiara Colantuono Michela Daniele Lucio Di Filippo Anna Manfredi Marcello Salvi Antonio Limone Luigi Atripaldi Andrea Ballabio Davide Cacchiarelli                                                                                                                                                                                                                                                                                                                                                                                                                                              |
| EPI_ISL_9209155, EPI_ISL_9209834, EPI_ISL_9209839, EPI_ISL_9209845, EPI_ISL_9209862, EPI_ISL_9209872, EPI_ISL_9209951, EPI_ISL_9210325, EPI_ISL_9210381, EPI_ISL_9210387, EPI_ISL_9210392, EPI_ISL_9210412, EPI_ISL_9210436, EPI_ISL_9210510, EPI_ISL_9210559, EPI_ISL_9210675, EPI_ISL_9636582, EPI_ISL_9636611, EPI_ISL_9636652, EPI_ISL_9636654, EPI_ISL_9636657, EPI_ISL_9636669, EPI_ISL_9636732, EPI_ISL_9636772, EPI_ISL_9636773                                                                                                                                         |                                                                                                           |                                                                                                                                                                                                                      |                                                                                                                                                                                                                                                                                                                                                                                                                                                                                                                                                                                                                                                                                                            |
| see above                                                                                                                                                                                                                                                                                                                                                                                                                                                                                                                                                                       | LabPLUS                                                                                                   | Institute of Environmental Science and Research (ESR)                                                                                                                                                                | Anja Werno; Antje van der Linden; Arlo Upton; Chris Mansell; Clare Gebbie; David Hammer; Dhanisha Patel; Dragana Drinkovic; Erasmus Smit; Gary McAuliffe; Hana Sofia Andersson; Hermes Perez; James Ussher; Jill Sherwood; Jing Wang; Joep de Ligt; Josh Freeman; Julia Howard; Juliet Elvy; Lauren Jelly; Mary DeAlmeida; Matt Blakiston; Matt Storey; Matthew Rogers; Max Bloomfield; Michael Addidle; Michelle Balm; Muhammad Faisal; Nikki Freed; Olin Silander; Olivia Stroeven; Rachel Boyle; Sally Roberts; SallyAnn Harbison; Sarah Cockerton; Sarah Jefferies; Sharmini Muttaiyah; Susan Morpeth; Susan Taylor; Timothy Blackmore; Vani Sathayendran; Veronica Playle; Virginia Hope; Xiaoyun Ren |
| EPI_ISL_9209698                                                                                                                                                                                                                                                                                                                                                                                                                                                                                                                                                                 | LabTests                                                                                                  | Institute of Environmental Science and Research (ESR)                                                                                                                                                                | Anja Werno; Antje van der Linden; Arlo Upton; Chris Mansell; Clare Gebbie; David Hammer; Dhanisha Patel; Dragana Drinkovic; Erasmus Smit; Gary McAuliffe; Hana Sofia Andersson; Hermes Perez; James Ussher; Jill Sherwood; Jing Wang; Joep de Ligt; Josh Freeman; Julia Howard; Juliet Elvy; Lauren Jelly; Mary DeAlmeida; Matt Blakiston; Matt Storey; Matthew Rogers; Max Bloomfield; Michael Addidle; Michelle Balm; Muhammad Faisal; Nikki Freed; Olin Silander; Olivia Stroeven; Rachel Boyle; Sally Roberts; SallyAnn Harbison; Sarah Cockerton; Sarah Jefferies; Sharmini Muttaiyah; Susan Morpeth; Susan Taylor; Timothy Blackmore; Vani Sathayendran; Veronica Playle; Virginia Hope; Xiaoyun Ren |
| EPI_ISL_9751342, EPI_ISL_9751343                                                                                                                                                                                                                                                                                                                                                                                                                                                                                                                                                | Labkesda Provinsi Banten                                                                                  | National Institute of Health Research and Development                                                                                                                                                                | Arie Ardiansyah Nugraha; Fajar Nur Sulistiyohadi; Hana Aparsi Pawestri; Hartanti Dian Ikawati; Kartika Dewi Puspa; Nelly Puspandari; Nur Ika Hariastuti; Puri Widia; Subangkit; Vivi Setiawaty                                                                                                                                                                                                                                                                                                                                                                                                                                                                                                             |
| EPI_ISL_9570624, EPI_ISL_9570625, EPI_ISL_9570626, EPI_ISL_9612402, EPI_ISL_9612425, EPI_ISL_9612426                                                                                                                                                                                                                                                                                                                                                                                                                                                                            | Labo Analyses Med                                                                                         | National Reference Center for Viruses of Respiratory Infections, Institut Pasteur, Paris                                                                                                                             | Angela Brisebarre; Camille Capel; Carine LECORRE; Caroline MALDERET; Christophe Malabat; Corinne Maufrays; Etienne Simon-Lorière; Frédéric Lemoine; Julien Fumey; Louise Lefrançois; Marion Barbet; Maud Vanpeene; Méline Bizard; Slim El Khari; Sylvie Behillil; Sylvie ROBERT; Sylvie Van der Werf; Vincent Enouf; XAVIER GUETTIER                                                                                                                                                                                                                                                                                                                                                                       |
| EPI_ISL_9489326, EPI_ISL_9665077, EPI_ISL_9665080, EPI_ISL_9665081, EPI_ISL_9665086, EPI_ISL_9665087, EPI_ISL_9665092, EPI_ISL_9665096, EPI_ISL_9665105, EPI_ISL_9665109, EPI_ISL_9665127, EPI_ISL_9665128, EPI_ISL_9665136, EPI_ISL_9665139, EPI_ISL_9665141, EPI_ISL_9665147, EPI_ISL_9665148, EPI_ISL_9665163, EPI_ISL_9665197                                                                                                                                                                                                                                               |                                                                                                           |                                                                                                                                                                                                                      |                                                                                                                                                                                                                                                                                                                                                                                                                                                                                                                                                                                                                                                                                                            |
| see above                                                                                                                                                                                                                                                                                                                                                                                                                                                                                                                                                                       | Labor Berlin Charité Vivantes GmbH / Institut für Virologie                                               | Charité Universitätsmedizin Berlin, Institut für Virologie/Labor Berlin                                                                                                                                              | Barbara Mühlemann; Christian Drosten; Christine Stephan; Peter Menzel; Rolf Schwarzer; Terry Jones; Victor M Corman                                                                                                                                                                                                                                                                                                                                                                                                                                                                                                                                                                                        |
| EPI_ISL_9218986, EPI_ISL_9219009, EPI_ISL_9219016, EPI_ISL_9219021, EPI_ISL_9219030, EPI_ISL_9219041, EPI_ISL_9219042, EPI_ISL_9219047, EPI_ISL_9219062, EPI_ISL_9219063, EPI_ISL_9219078, EPI_ISL_9461907, EPI_ISL_9461920, EPI_ISL_9461929, EPI_ISL_9461937, EPI_ISL_9461941, EPI_ISL_9461945, EPI_ISL_9461949, EPI_ISL_9461950, EPI_ISL_9461955, EPI_ISL_9461964, EPI_ISL_9461983, EPI_ISL_9461984, EPI_ISL_9461989, EPI_ISL_9461994, EPI_ISL_9462024, EPI_ISL_9462367, EPI_ISL_9462371, EPI_ISL_9462404                                                                     |                                                                                                           |                                                                                                                                                                                                                      |                                                                                                                                                                                                                                                                                                                                                                                                                                                                                                                                                                                                                                                                                                            |
| see above                                                                                                                                                                                                                                                                                                                                                                                                                                                                                                                                                                       | Labor Lübeck bzw. Laborärztliche Gemeinschaftspraxis Lübeck                                               | Robert Koch Institute                                                                                                                                                                                                |                                                                                                                                                                                                                                                                                                                                                                                                                                                                                                                                                                                                                                                                                                            |
| EPI_ISL_9668955                                                                                                                                                                                                                                                                                                                                                                                                                                                                                                                                                                 | Laboratoire Bioconcorde                                                                                   | Department of Virology, Henri Mondor University Hospital, Assistance Publique Hôpitaux de Paris, Université Paris-Est Créteil, INSERM U955                                                                           | Alexandre Soulier; Christophe Rodriguez; Elisabeth Trawinski; Guillaume Gricourt; Jean-Michel Pawlowsky; Melissa N'Debi; Slim Fourati; Vanessa Demontant                                                                                                                                                                                                                                                                                                                                                                                                                                                                                                                                                   |
| EPI_ISL_9616689, EPI_ISL_9616690, EPI_ISL_9616692, EPI_ISL_9616699, EPI_ISL_9616777, EPI_ISL_9616944, EPI_ISL_9616948                                                                                                                                                                                                                                                                                                                                                                                                                                                           |                                                                                                           |                                                                                                                                                                                                                      |                                                                                                                                                                                                                                                                                                                                                                                                                                                                                                                                                                                                                                                                                                            |
| see above                                                                                                                                                                                                                                                                                                                                                                                                                                                                                                                                                                       | Laboratoire national de sante, Microbiology, Virology                                                     | Laboratoire national de sante, Microbiology, Microbial Genomics Platform                                                                                                                                             | Anke Wienecke-Baldacchino; Catherine Ragimbeau; Elodie Solarino; Fatu Djabi; Jessica Tapp; Lise Pignon; Raoul Salmon; Sibel Berger; Tamir Abdelrahman; Trung Nguyen Nguyen; Virginie Jover                                                                                                                                                                                                                                                                                                                                                                                                                                                                                                                 |
| EPI_ISL_9376197, EPI_ISL_9376205, EPI_ISL_9376213, EPI_ISL_9376225                                                                                                                                                                                                                                                                                                                                                                                                                                                                                                              | Laboratoria Medyczne Bruss grupa ALAB sp. z o.o.; Medyczne Laboratorium Diagnostyczne, Pracownia Genetyki | 1. Tricity SARS-CoV-2 sequencing consortium: University of Gdansk, Medical University of Gdansk, Vaxican Ltd., Invicta Ltd. 2. National Institute of Public Health - National Institute of Hygiene, Warsaw, Poland   | Celina Cybulska; Karolina Gackowska; Katarzyna Groth; Katarzyna Zacharczuk; Krystyna Bienkowska Szewczyk; Lukasz Rabalski; Maciej Grzybek; Maciej Kosinski; Magdalena Nowakowska; Marcin Lubocki; Małgorzata Sadkowska-Todys; Tomasz Woikowicz                                                                                                                                                                                                                                                                                                                                                                                                                                                             |
| EPI_ISL_9799200                                                                                                                                                                                                                                                                                                                                                                                                                                                                                                                                                                 | LaboratorieMedicinskt Centrum Gotland                                                                     | Karolinska University Hospital                                                                                                                                                                                       | Annika Tiveljung Lindell; Henning Onsbring; Jan Albert; Karina Hentrich; Lynda Eneh; Maria Ropat; Martin Ekman; Natalija Gerasimcik; Robert Dyrdak; Sandra Broddesson; Shambhu Ganeshappa Aralaguppe; Tanja Normark; Tobias Allander; Valteri Wirta; Zhibing Yun                                                                                                                                                                                                                                                                                                                                                                                                                                           |
| EPI_ISL_9775481                                                                                                                                                                                                                                                                                                                                                                                                                                                                                                                                                                 | Laboratorio di Epidemiologia Molecolare e Sanità Pubblica-Policlinico, Bari                               | University of Bari Biomedical Sciences and Human Oncology                                                                                                                                                            | Accogli Marisa; Chironna Maria; Loconsole Daniela; Sallustio Anna                                                                                                                                                                                                                                                                                                                                                                                                                                                                                                                                                                                                                                          |
| EPI_ISL_9126244, EPI_ISL_9126503, EPI_ISL_9126847, EPI_ISL_9387263                                                                                                                                                                                                                                                                                                                                                                                                                                                                                                              | Laboratorio di Microbiologia                                                                              | Laboratorio di Microbiologia, Istituto di Medicina di Laboratorio EOLAB, Ente Ospedaliero Cantonale                                                                                                                  | Martinetti Lucchini Gladys; Valeria Spina                                                                                                                                                                                                                                                                                                                                                                                                                                                                                                                                                                                                                                                                  |
| EPI_ISL_9705900                                                                                                                                                                                                                                                                                                                                                                                                                                                                                                                                                                 | Laboratorium Analiz Lekarskich Alab Bydgoszcz                                                             | 206. Tricity SARS-CoV-2 sequencing consortium: University of Gdansk, Medical University of Gdansk, Vaxican Ltd., Invicta Ltd. 2. National Institute of Public Health - National Institute of Hygiene, Warsaw, Poland | Celina Cybulska; Karolina Gackowska; Katarzyna Groth; Katarzyna Zacharczuk; Krystyna Bienkowska Szewczyk; Lukasz Rabalski; Maciej Grzybek; Maciej Kosinski; Magdalena Nowakowska; Marcin Lubocki; Małgorzata Sadkowska-Todys; Tomasz Woikowicz                                                                                                                                                                                                                                                                                                                                                                                                                                                             |
| EPI_ISL_9490949,                                                                                                                                                                                                                                                                                                                                                                                                                                                                                                                                                                | Laboratorium Diagnostyczne Centrum Medyczne                                                               | Wojewodzka Stacja Sanitarno-Epidemiologiczna w                                                                                                                                                                       | Anna Nowakowska; Karolina Ostrowska; Katarzyna Wilk; Marzena Baranowska                                                                                                                                                                                                                                                                                                                                                                                                                                                                                                                                                                                                                                    |

|                                                                                                                                                                                                                                                                                                                                                                                                                                                                                                                                                                                                                                                                                                                                                                                                                                                                                                                                                                                                                                                                                                                                                                                                                                                                                                                                                                                                                                                                                                                                                                                                                                                                                                                                                                                                                                                                                                                                                                                                                                                                                                                                                                                                                                                                                                                                                                                                                                                                                                                                                                                                                                                                                                                                                                                                                                                                                                                                                                                                                                                                                                                                                                                                                                                                                                                                                                                                                                                                                                                                                                                                                                                                                                                                                                                                                                                                                                                                                                                                                                                                                                                                                                                                                                                                                                                                                                                                                                                                                                                                                                                                                                                                                                                                                                                                                                                                                                                                                                                                                                                                                                                                                                                                                                                                                                                                                                                                                                                                                                                                                                                                                                                                                                                                                                                                                                                                                                                                                                                                                                                                                                                                                                                                                                                                                                                                                                                                                                                                                                                                                                                                                                                                                                                                                                                                                                                                                                                                                                                                                                                                                                                                                                                                                                                                                                                                                                                                                                                                                                                                                                                                                                                                                                                                                                                                                                                                                                                                                                                                                                                                                                                                                                                                                                                                                                                                                                                                                                                                                                                                                                                                                                                                                                                                                                                                                                                                                                                                                                                                                                                                                                                                                                                                                                                                                                                                                                                                                                                                                                                                                                                                                                                                                                                                                                                                                                                                                                                                                                                                                                                                                                                                                                                                                                                                                                                                                                                                                                                                                                                                                                                                                                                                                                                                                                                                                                                                                                                                                                                                                                                                                                                                                                                                                                                                                                                                                                                                                                                                                                                                                                                                                                                                                                                                                                                                                                                                                                                                                                                                                                                                                                                                                                                                                                                                                                                                                                                                                                                                                                                                                                                                                                                                                                                                                                                                                                                                                                                                                                                                                                                                                                                                                                                                                                                                                                                                                                                                                                                                                                                                                                                                                                                                                                                                                                                                                                                                                                                                             |                                                                                |                                                                                                           |                                                                                                                                                                                                                                                                                                                                                                                                                                                                                                                                                                                                                                                                                                                                                                                                                                                                                                                                                                                                                    |
|---------------------------------------------------------------------------------------------------------------------------------------------------------------------------------------------------------------------------------------------------------------------------------------------------------------------------------------------------------------------------------------------------------------------------------------------------------------------------------------------------------------------------------------------------------------------------------------------------------------------------------------------------------------------------------------------------------------------------------------------------------------------------------------------------------------------------------------------------------------------------------------------------------------------------------------------------------------------------------------------------------------------------------------------------------------------------------------------------------------------------------------------------------------------------------------------------------------------------------------------------------------------------------------------------------------------------------------------------------------------------------------------------------------------------------------------------------------------------------------------------------------------------------------------------------------------------------------------------------------------------------------------------------------------------------------------------------------------------------------------------------------------------------------------------------------------------------------------------------------------------------------------------------------------------------------------------------------------------------------------------------------------------------------------------------------------------------------------------------------------------------------------------------------------------------------------------------------------------------------------------------------------------------------------------------------------------------------------------------------------------------------------------------------------------------------------------------------------------------------------------------------------------------------------------------------------------------------------------------------------------------------------------------------------------------------------------------------------------------------------------------------------------------------------------------------------------------------------------------------------------------------------------------------------------------------------------------------------------------------------------------------------------------------------------------------------------------------------------------------------------------------------------------------------------------------------------------------------------------------------------------------------------------------------------------------------------------------------------------------------------------------------------------------------------------------------------------------------------------------------------------------------------------------------------------------------------------------------------------------------------------------------------------------------------------------------------------------------------------------------------------------------------------------------------------------------------------------------------------------------------------------------------------------------------------------------------------------------------------------------------------------------------------------------------------------------------------------------------------------------------------------------------------------------------------------------------------------------------------------------------------------------------------------------------------------------------------------------------------------------------------------------------------------------------------------------------------------------------------------------------------------------------------------------------------------------------------------------------------------------------------------------------------------------------------------------------------------------------------------------------------------------------------------------------------------------------------------------------------------------------------------------------------------------------------------------------------------------------------------------------------------------------------------------------------------------------------------------------------------------------------------------------------------------------------------------------------------------------------------------------------------------------------------------------------------------------------------------------------------------------------------------------------------------------------------------------------------------------------------------------------------------------------------------------------------------------------------------------------------------------------------------------------------------------------------------------------------------------------------------------------------------------------------------------------------------------------------------------------------------------------------------------------------------------------------------------------------------------------------------------------------------------------------------------------------------------------------------------------------------------------------------------------------------------------------------------------------------------------------------------------------------------------------------------------------------------------------------------------------------------------------------------------------------------------------------------------------------------------------------------------------------------------------------------------------------------------------------------------------------------------------------------------------------------------------------------------------------------------------------------------------------------------------------------------------------------------------------------------------------------------------------------------------------------------------------------------------------------------------------------------------------------------------------------------------------------------------------------------------------------------------------------------------------------------------------------------------------------------------------------------------------------------------------------------------------------------------------------------------------------------------------------------------------------------------------------------------------------------------------------------------------------------------------------------------------------------------------------------------------------------------------------------------------------------------------------------------------------------------------------------------------------------------------------------------------------------------------------------------------------------------------------------------------------------------------------------------------------------------------------------------------------------------------------------------------------------------------------------------------------------------------------------------------------------------------------------------------------------------------------------------------------------------------------------------------------------------------------------------------------------------------------------------------------------------------------------------------------------------------------------------------------------------------------------------------------------------------------------------------------------------------------------------------------------------------------------------------------------------------------------------------------------------------------------------------------------------------------------------------------------------------------------------------------------------------------------------------------------------------------------------------------------------------------------------------------------------------------------------------------------------------------------------------------------------------------------------------------------------------------------------------------------------------------------------------------------------------------------------------------------------------------------------------------------------------------------------------------------------------------------------------------------------------------------------------------------------------------------------------------------------------------------------------------------------------------------------------------------------------------------------------------------------------------------------------------------------------------------------------------------------------------------------------------------------------------------------------------------------------------------------------------------------------------------------------------------------------------------------------------------------------------------------------------------------------------------------------------------------------------------------------------------------------------------------------------------------------------------------------------------------------------------------------------------------------------------------------------------------------------------------------------------------------------------------------------------------------------------------------------------------------------------------------------------------------------------------------------------------------------------------------------------------------------------------------------------------------------------------------------------------------------------------------------------------------------------------------------------------------------------------------------------------------------------------------------------------------------------------------------------------------------------------------------------------------------------------------------------------------------------------------------------------------------------------------------------------------------------------------------------------------------------------------------------------------------------------------------------------------------------------------------------------------------------------------------------------------------------------------------------------------------------------------------------------------------------------------------------------------------------------------------------------------------------------------------------------------------------------------------------------------------------------------------------------------------------------------------------------------------------------------------------------------------------------------------------------------------------------------------------------------------------------------------------------------------------------------------------------------------------------------------------------------------------------------------------------------------------------------------------------------------------------------------------------------------------------------------------------------------------------------------------------------------------------------------------------------------------------------------------------------------------------------------------------------------------------------------------------------------------------------------------------------------------------------------------------------------------------------------------------------------------------------------------------------------------------------------------------------------------------------------------------------------------------------------------------------------------------------------------------------------------------------------------------------------------------------------------------------------------------------------------------------------------------------------------------------------------------------------------------------------------------------------------------------------------------------------------------------------------------------------------------------------------------------------------------------------------------------------------------------------------------------------------------------------------------------------------------------------------------------------------------------------------------------------------------------------------------------------------------------------------------------------------------------|--------------------------------------------------------------------------------|-----------------------------------------------------------------------------------------------------------|--------------------------------------------------------------------------------------------------------------------------------------------------------------------------------------------------------------------------------------------------------------------------------------------------------------------------------------------------------------------------------------------------------------------------------------------------------------------------------------------------------------------------------------------------------------------------------------------------------------------------------------------------------------------------------------------------------------------------------------------------------------------------------------------------------------------------------------------------------------------------------------------------------------------------------------------------------------------------------------------------------------------|
| EPI_ISL_9491093                                                                                                                                                                                                                                                                                                                                                                                                                                                                                                                                                                                                                                                                                                                                                                                                                                                                                                                                                                                                                                                                                                                                                                                                                                                                                                                                                                                                                                                                                                                                                                                                                                                                                                                                                                                                                                                                                                                                                                                                                                                                                                                                                                                                                                                                                                                                                                                                                                                                                                                                                                                                                                                                                                                                                                                                                                                                                                                                                                                                                                                                                                                                                                                                                                                                                                                                                                                                                                                                                                                                                                                                                                                                                                                                                                                                                                                                                                                                                                                                                                                                                                                                                                                                                                                                                                                                                                                                                                                                                                                                                                                                                                                                                                                                                                                                                                                                                                                                                                                                                                                                                                                                                                                                                                                                                                                                                                                                                                                                                                                                                                                                                                                                                                                                                                                                                                                                                                                                                                                                                                                                                                                                                                                                                                                                                                                                                                                                                                                                                                                                                                                                                                                                                                                                                                                                                                                                                                                                                                                                                                                                                                                                                                                                                                                                                                                                                                                                                                                                                                                                                                                                                                                                                                                                                                                                                                                                                                                                                                                                                                                                                                                                                                                                                                                                                                                                                                                                                                                                                                                                                                                                                                                                                                                                                                                                                                                                                                                                                                                                                                                                                                                                                                                                                                                                                                                                                                                                                                                                                                                                                                                                                                                                                                                                                                                                                                                                                                                                                                                                                                                                                                                                                                                                                                                                                                                                                                                                                                                                                                                                                                                                                                                                                                                                                                                                                                                                                                                                                                                                                                                                                                                                                                                                                                                                                                                                                                                                                                                                                                                                                                                                                                                                                                                                                                                                                                                                                                                                                                                                                                                                                                                                                                                                                                                                                                                                                                                                                                                                                                                                                                                                                                                                                                                                                                                                                                                                                                                                                                                                                                                                                                                                                                                                                                                                                                                                                                                                                                                                                                                                                                                                                                                                                                                                                                                                                                                                                                                             | LuxMed                                                                         | Rzeszowie, Laboratorium Diagnostyki Medycznej                                                             |                                                                                                                                                                                                                                                                                                                                                                                                                                                                                                                                                                                                                                                                                                                                                                                                                                                                                                                                                                                                                    |
| EPI_ISL_9506379                                                                                                                                                                                                                                                                                                                                                                                                                                                                                                                                                                                                                                                                                                                                                                                                                                                                                                                                                                                                                                                                                                                                                                                                                                                                                                                                                                                                                                                                                                                                                                                                                                                                                                                                                                                                                                                                                                                                                                                                                                                                                                                                                                                                                                                                                                                                                                                                                                                                                                                                                                                                                                                                                                                                                                                                                                                                                                                                                                                                                                                                                                                                                                                                                                                                                                                                                                                                                                                                                                                                                                                                                                                                                                                                                                                                                                                                                                                                                                                                                                                                                                                                                                                                                                                                                                                                                                                                                                                                                                                                                                                                                                                                                                                                                                                                                                                                                                                                                                                                                                                                                                                                                                                                                                                                                                                                                                                                                                                                                                                                                                                                                                                                                                                                                                                                                                                                                                                                                                                                                                                                                                                                                                                                                                                                                                                                                                                                                                                                                                                                                                                                                                                                                                                                                                                                                                                                                                                                                                                                                                                                                                                                                                                                                                                                                                                                                                                                                                                                                                                                                                                                                                                                                                                                                                                                                                                                                                                                                                                                                                                                                                                                                                                                                                                                                                                                                                                                                                                                                                                                                                                                                                                                                                                                                                                                                                                                                                                                                                                                                                                                                                                                                                                                                                                                                                                                                                                                                                                                                                                                                                                                                                                                                                                                                                                                                                                                                                                                                                                                                                                                                                                                                                                                                                                                                                                                                                                                                                                                                                                                                                                                                                                                                                                                                                                                                                                                                                                                                                                                                                                                                                                                                                                                                                                                                                                                                                                                                                                                                                                                                                                                                                                                                                                                                                                                                                                                                                                                                                                                                                                                                                                                                                                                                                                                                                                                                                                                                                                                                                                                                                                                                                                                                                                                                                                                                                                                                                                                                                                                                                                                                                                                                                                                                                                                                                                                                                                                                                                                                                                                                                                                                                                                                                                                                                                                                                                                                                                             | Laboratorium Diagnostyki COVID-19 w Instytucie Genetyki Człowieka PAN          | Wojewódzka Stacja Sanitarno-Epidemiologiczna w Łodzi, Oddział Laborystyczny Mikrobiologii i Parazytologii | Agnieszka Karnowska; Aleksandra Krawczyk; Danuta Bartczak; Elian Terpo; Katarzyna Kosowska; Lucyna Kochanowska; Marta Gawronska; Martyna Matera; Szymon Konkolewski                                                                                                                                                                                                                                                                                                                                                                                                                                                                                                                                                                                                                                                                                                                                                                                                                                                |
| EPI_ISL_9490824                                                                                                                                                                                                                                                                                                                                                                                                                                                                                                                                                                                                                                                                                                                                                                                                                                                                                                                                                                                                                                                                                                                                                                                                                                                                                                                                                                                                                                                                                                                                                                                                                                                                                                                                                                                                                                                                                                                                                                                                                                                                                                                                                                                                                                                                                                                                                                                                                                                                                                                                                                                                                                                                                                                                                                                                                                                                                                                                                                                                                                                                                                                                                                                                                                                                                                                                                                                                                                                                                                                                                                                                                                                                                                                                                                                                                                                                                                                                                                                                                                                                                                                                                                                                                                                                                                                                                                                                                                                                                                                                                                                                                                                                                                                                                                                                                                                                                                                                                                                                                                                                                                                                                                                                                                                                                                                                                                                                                                                                                                                                                                                                                                                                                                                                                                                                                                                                                                                                                                                                                                                                                                                                                                                                                                                                                                                                                                                                                                                                                                                                                                                                                                                                                                                                                                                                                                                                                                                                                                                                                                                                                                                                                                                                                                                                                                                                                                                                                                                                                                                                                                                                                                                                                                                                                                                                                                                                                                                                                                                                                                                                                                                                                                                                                                                                                                                                                                                                                                                                                                                                                                                                                                                                                                                                                                                                                                                                                                                                                                                                                                                                                                                                                                                                                                                                                                                                                                                                                                                                                                                                                                                                                                                                                                                                                                                                                                                                                                                                                                                                                                                                                                                                                                                                                                                                                                                                                                                                                                                                                                                                                                                                                                                                                                                                                                                                                                                                                                                                                                                                                                                                                                                                                                                                                                                                                                                                                                                                                                                                                                                                                                                                                                                                                                                                                                                                                                                                                                                                                                                                                                                                                                                                                                                                                                                                                                                                                                                                                                                                                                                                                                                                                                                                                                                                                                                                                                                                                                                                                                                                                                                                                                                                                                                                                                                                                                                                                                                                                                                                                                                                                                                                                                                                                                                                                                                                                                                                                                                             | Laboratorium Genetyczna Alab Plus                                              | Wojewódzka Stacja Sanitarno-Epidemiologiczna w Rzeszowie, Laboratorium Diagnostyki Medycznej              | Anna Nowakowska; Karolina Ostrowska; Katarzyna Wilk; Marzena Baranowska                                                                                                                                                                                                                                                                                                                                                                                                                                                                                                                                                                                                                                                                                                                                                                                                                                                                                                                                            |
| EPI_ISL_9728504                                                                                                                                                                                                                                                                                                                                                                                                                                                                                                                                                                                                                                                                                                                                                                                                                                                                                                                                                                                                                                                                                                                                                                                                                                                                                                                                                                                                                                                                                                                                                                                                                                                                                                                                                                                                                                                                                                                                                                                                                                                                                                                                                                                                                                                                                                                                                                                                                                                                                                                                                                                                                                                                                                                                                                                                                                                                                                                                                                                                                                                                                                                                                                                                                                                                                                                                                                                                                                                                                                                                                                                                                                                                                                                                                                                                                                                                                                                                                                                                                                                                                                                                                                                                                                                                                                                                                                                                                                                                                                                                                                                                                                                                                                                                                                                                                                                                                                                                                                                                                                                                                                                                                                                                                                                                                                                                                                                                                                                                                                                                                                                                                                                                                                                                                                                                                                                                                                                                                                                                                                                                                                                                                                                                                                                                                                                                                                                                                                                                                                                                                                                                                                                                                                                                                                                                                                                                                                                                                                                                                                                                                                                                                                                                                                                                                                                                                                                                                                                                                                                                                                                                                                                                                                                                                                                                                                                                                                                                                                                                                                                                                                                                                                                                                                                                                                                                                                                                                                                                                                                                                                                                                                                                                                                                                                                                                                                                                                                                                                                                                                                                                                                                                                                                                                                                                                                                                                                                                                                                                                                                                                                                                                                                                                                                                                                                                                                                                                                                                                                                                                                                                                                                                                                                                                                                                                                                                                                                                                                                                                                                                                                                                                                                                                                                                                                                                                                                                                                                                                                                                                                                                                                                                                                                                                                                                                                                                                                                                                                                                                                                                                                                                                                                                                                                                                                                                                                                                                                                                                                                                                                                                                                                                                                                                                                                                                                                                                                                                                                                                                                                                                                                                                                                                                                                                                                                                                                                                                                                                                                                                                                                                                                                                                                                                                                                                                                                                                                                                                                                                                                                                                                                                                                                                                                                                                                                                                                                                                                             | Laboratorium Kimia Firma                                                       | Genomik Solidaritas Indonesia Laboratorium                                                                | Aisyi Sakina Rifani; Annisa Muthiah Sukirman; Anuraj Shankar; Ariel Pradipta; Dian Pitaloka Rajagukguk; Esti Rahayuning Tias; Gracia Felias Enos Korompis; Latifah Anandari; Louisa Markus; Meutia Ayuputeri Kumaheri; Stefanus Bernard; Vania Gavriła Wikasa                                                                                                                                                                                                                                                                                                                                                                                                                                                                                                                                                                                                                                                                                                                                                      |
| EPI_ISL_9504189, EPI_ISL_9504191                                                                                                                                                                                                                                                                                                                                                                                                                                                                                                                                                                                                                                                                                                                                                                                                                                                                                                                                                                                                                                                                                                                                                                                                                                                                                                                                                                                                                                                                                                                                                                                                                                                                                                                                                                                                                                                                                                                                                                                                                                                                                                                                                                                                                                                                                                                                                                                                                                                                                                                                                                                                                                                                                                                                                                                                                                                                                                                                                                                                                                                                                                                                                                                                                                                                                                                                                                                                                                                                                                                                                                                                                                                                                                                                                                                                                                                                                                                                                                                                                                                                                                                                                                                                                                                                                                                                                                                                                                                                                                                                                                                                                                                                                                                                                                                                                                                                                                                                                                                                                                                                                                                                                                                                                                                                                                                                                                                                                                                                                                                                                                                                                                                                                                                                                                                                                                                                                                                                                                                                                                                                                                                                                                                                                                                                                                                                                                                                                                                                                                                                                                                                                                                                                                                                                                                                                                                                                                                                                                                                                                                                                                                                                                                                                                                                                                                                                                                                                                                                                                                                                                                                                                                                                                                                                                                                                                                                                                                                                                                                                                                                                                                                                                                                                                                                                                                                                                                                                                                                                                                                                                                                                                                                                                                                                                                                                                                                                                                                                                                                                                                                                                                                                                                                                                                                                                                                                                                                                                                                                                                                                                                                                                                                                                                                                                                                                                                                                                                                                                                                                                                                                                                                                                                                                                                                                                                                                                                                                                                                                                                                                                                                                                                                                                                                                                                                                                                                                                                                                                                                                                                                                                                                                                                                                                                                                                                                                                                                                                                                                                                                                                                                                                                                                                                                                                                                                                                                                                                                                                                                                                                                                                                                                                                                                                                                                                                                                                                                                                                                                                                                                                                                                                                                                                                                                                                                                                                                                                                                                                                                                                                                                                                                                                                                                                                                                                                                                                                                                                                                                                                                                                                                                                                                                                                                                                                                                                                                                                            | Laboratorium Medilab Jakarta                                                   | Genomik Solidaritas Indonesia Laboratorium                                                                | Anna Christina Brazia; Annisa Muthiah Sukirman; Anuraj Shankar; Ariel Pradipta; Carissa Sintca Wijaya; Dhahli Agustina Cahyono; Fitri Winita; Gracia Felias Enos Korompis; Louisa Markus; Meutia Ayuputeri Kumaheri; Reinhart Gabriel; Stefanus Bernard                                                                                                                                                                                                                                                                                                                                                                                                                                                                                                                                                                                                                                                                                                                                                            |
| EPI_ISL_9272253                                                                                                                                                                                                                                                                                                                                                                                                                                                                                                                                                                                                                                                                                                                                                                                                                                                                                                                                                                                                                                                                                                                                                                                                                                                                                                                                                                                                                                                                                                                                                                                                                                                                                                                                                                                                                                                                                                                                                                                                                                                                                                                                                                                                                                                                                                                                                                                                                                                                                                                                                                                                                                                                                                                                                                                                                                                                                                                                                                                                                                                                                                                                                                                                                                                                                                                                                                                                                                                                                                                                                                                                                                                                                                                                                                                                                                                                                                                                                                                                                                                                                                                                                                                                                                                                                                                                                                                                                                                                                                                                                                                                                                                                                                                                                                                                                                                                                                                                                                                                                                                                                                                                                                                                                                                                                                                                                                                                                                                                                                                                                                                                                                                                                                                                                                                                                                                                                                                                                                                                                                                                                                                                                                                                                                                                                                                                                                                                                                                                                                                                                                                                                                                                                                                                                                                                                                                                                                                                                                                                                                                                                                                                                                                                                                                                                                                                                                                                                                                                                                                                                                                                                                                                                                                                                                                                                                                                                                                                                                                                                                                                                                                                                                                                                                                                                                                                                                                                                                                                                                                                                                                                                                                                                                                                                                                                                                                                                                                                                                                                                                                                                                                                                                                                                                                                                                                                                                                                                                                                                                                                                                                                                                                                                                                                                                                                                                                                                                                                                                                                                                                                                                                                                                                                                                                                                                                                                                                                                                                                                                                                                                                                                                                                                                                                                                                                                                                                                                                                                                                                                                                                                                                                                                                                                                                                                                                                                                                                                                                                                                                                                                                                                                                                                                                                                                                                                                                                                                                                                                                                                                                                                                                                                                                                                                                                                                                                                                                                                                                                                                                                                                                                                                                                                                                                                                                                                                                                                                                                                                                                                                                                                                                                                                                                                                                                                                                                                                                                                                                                                                                                                                                                                                                                                                                                                                                                                                                                                                                             | Laboratorium RS Abdi Waluyo                                                    | Genomik Solidaritas Indonesia Laboratorium                                                                | Aisyi Sakina Rifani; Anna Christina Brazia; Annisa Muthiah Sukirman; Anuraj Shankar; Ariel Pradipta; Dian Tri Wahyudi; Gracia Felias Enos Korompis; Louisa Markus; Meutia Ayuputeri Kumaheri; Stefanus Bernard                                                                                                                                                                                                                                                                                                                                                                                                                                                                                                                                                                                                                                                                                                                                                                                                     |
| EPI_ISL_9272241, EPI_ISL_9272242                                                                                                                                                                                                                                                                                                                                                                                                                                                                                                                                                                                                                                                                                                                                                                                                                                                                                                                                                                                                                                                                                                                                                                                                                                                                                                                                                                                                                                                                                                                                                                                                                                                                                                                                                                                                                                                                                                                                                                                                                                                                                                                                                                                                                                                                                                                                                                                                                                                                                                                                                                                                                                                                                                                                                                                                                                                                                                                                                                                                                                                                                                                                                                                                                                                                                                                                                                                                                                                                                                                                                                                                                                                                                                                                                                                                                                                                                                                                                                                                                                                                                                                                                                                                                                                                                                                                                                                                                                                                                                                                                                                                                                                                                                                                                                                                                                                                                                                                                                                                                                                                                                                                                                                                                                                                                                                                                                                                                                                                                                                                                                                                                                                                                                                                                                                                                                                                                                                                                                                                                                                                                                                                                                                                                                                                                                                                                                                                                                                                                                                                                                                                                                                                                                                                                                                                                                                                                                                                                                                                                                                                                                                                                                                                                                                                                                                                                                                                                                                                                                                                                                                                                                                                                                                                                                                                                                                                                                                                                                                                                                                                                                                                                                                                                                                                                                                                                                                                                                                                                                                                                                                                                                                                                                                                                                                                                                                                                                                                                                                                                                                                                                                                                                                                                                                                                                                                                                                                                                                                                                                                                                                                                                                                                                                                                                                                                                                                                                                                                                                                                                                                                                                                                                                                                                                                                                                                                                                                                                                                                                                                                                                                                                                                                                                                                                                                                                                                                                                                                                                                                                                                                                                                                                                                                                                                                                                                                                                                                                                                                                                                                                                                                                                                                                                                                                                                                                                                                                                                                                                                                                                                                                                                                                                                                                                                                                                                                                                                                                                                                                                                                                                                                                                                                                                                                                                                                                                                                                                                                                                                                                                                                                                                                                                                                                                                                                                                                                                                                                                                                                                                                                                                                                                                                                                                                                                                                                                                                                            | Laboratorium Rumah Sakit Pusat Pertamina                                       | Genomik Solidaritas Indonesia Laboratorium                                                                | Aisyi Sakina Rifani; Anna Christina Brazia; Annisa Muthiah Sukirman; Anuraj Shankar; Ariel Pradipta; Dian Tri Wahyudi; Gracia Felias Enos Korompis; Louisa Markus; Meutia Ayuputeri Kumaheri; Sakti; Sibro; Stefanus Bernard                                                                                                                                                                                                                                                                                                                                                                                                                                                                                                                                                                                                                                                                                                                                                                                       |
| EPI_ISL_9473324, EPI_ISL_9473347, EPI_ISL_9476341, EPI_ISL_9476831, EPI_ISL_9476839, EPI_ISL_9476891, EPI_ISL_9476902, EPI_ISL_9477019, EPI_ISL_9478559, EPI_ISL_9481811, EPI_ISL_9517894, EPI_ISL_9517895                                                                                                                                                                                                                                                                                                                                                                                                                                                                                                                                                                                                                                                                                                                                                                                                                                                                                                                                                                                                                                                                                                                                                                                                                                                                                                                                                                                                                                                                                                                                                                                                                                                                                                                                                                                                                                                                                                                                                                                                                                                                                                                                                                                                                                                                                                                                                                                                                                                                                                                                                                                                                                                                                                                                                                                                                                                                                                                                                                                                                                                                                                                                                                                                                                                                                                                                                                                                                                                                                                                                                                                                                                                                                                                                                                                                                                                                                                                                                                                                                                                                                                                                                                                                                                                                                                                                                                                                                                                                                                                                                                                                                                                                                                                                                                                                                                                                                                                                                                                                                                                                                                                                                                                                                                                                                                                                                                                                                                                                                                                                                                                                                                                                                                                                                                                                                                                                                                                                                                                                                                                                                                                                                                                                                                                                                                                                                                                                                                                                                                                                                                                                                                                                                                                                                                                                                                                                                                                                                                                                                                                                                                                                                                                                                                                                                                                                                                                                                                                                                                                                                                                                                                                                                                                                                                                                                                                                                                                                                                                                                                                                                                                                                                                                                                                                                                                                                                                                                                                                                                                                                                                                                                                                                                                                                                                                                                                                                                                                                                                                                                                                                                                                                                                                                                                                                                                                                                                                                                                                                                                                                                                                                                                                                                                                                                                                                                                                                                                                                                                                                                                                                                                                                                                                                                                                                                                                                                                                                                                                                                                                                                                                                                                                                                                                                                                                                                                                                                                                                                                                                                                                                                                                                                                                                                                                                                                                                                                                                                                                                                                                                                                                                                                                                                                                                                                                                                                                                                                                                                                                                                                                                                                                                                                                                                                                                                                                                                                                                                                                                                                                                                                                                                                                                                                                                                                                                                                                                                                                                                                                                                                                                                                                                                                                                                                                                                                                                                                                                                                                                                                                                                                                                                                                                                                                  | Laboratory Corporation of America                                              | Centers for Disease Control and Prevention Division of Viral Diseases, Pathogen Discovery                 | Amanda Douglas; Amanda Suchanek; Andrea Throop; Ayla Burns; Benjamin Rambo-Martin; Bobbi Cro; Brian Krueger; Brian Norvell; Christopher Gulvick; Christopher Petropoulos; Clinton Paden; Craig Lukacs; Dakota Howard; Debbie Boles; Dhvani Batra; Duncan MacCannell; Eyad Almasri; Goran Stevovich; Howard Engler; Hrushikesh Deshmukh; Jake Humphrey; Jason Schroter; Jason Caravas; Joe Voshell; John Pruitt; Jonathan Melstet; Jonathan Williams; Kimberly Wagner; Kristine Lacey; Lax Iyer; Lisa Pfefferle; Lyndon Tillon; Manoj Jain; Marcia Eisenberg; Mary Cristobal; Mary Williamson; Matthew Robinson; Matthew Schager; Michael Levandoski; Mike Sapat; Mandy Nyam; Minoo Agarwal; Mohan Kolli; Nuthwan Charoensri; Oren Cohen; Peter Cook; Prashant Gupta; Qian Zeng; Rama Ghatti; Scott Parker; Scott Ryman; Scott Sammons; Shatavia Morrison; Stanley Letovsky; Steven Rahn; Suresh Selvaraju; Susan Countrymann; Susan Hicks; Suzanne Dale; Thomas Urban; Thomas Udell; Victoria Chai; Yvette Unanueh |
| EPI_ISL_9798872                                                                                                                                                                                                                                                                                                                                                                                                                                                                                                                                                                                                                                                                                                                                                                                                                                                                                                                                                                                                                                                                                                                                                                                                                                                                                                                                                                                                                                                                                                                                                                                                                                                                                                                                                                                                                                                                                                                                                                                                                                                                                                                                                                                                                                                                                                                                                                                                                                                                                                                                                                                                                                                                                                                                                                                                                                                                                                                                                                                                                                                                                                                                                                                                                                                                                                                                                                                                                                                                                                                                                                                                                                                                                                                                                                                                                                                                                                                                                                                                                                                                                                                                                                                                                                                                                                                                                                                                                                                                                                                                                                                                                                                                                                                                                                                                                                                                                                                                                                                                                                                                                                                                                                                                                                                                                                                                                                                                                                                                                                                                                                                                                                                                                                                                                                                                                                                                                                                                                                                                                                                                                                                                                                                                                                                                                                                                                                                                                                                                                                                                                                                                                                                                                                                                                                                                                                                                                                                                                                                                                                                                                                                                                                                                                                                                                                                                                                                                                                                                                                                                                                                                                                                                                                                                                                                                                                                                                                                                                                                                                                                                                                                                                                                                                                                                                                                                                                                                                                                                                                                                                                                                                                                                                                                                                                                                                                                                                                                                                                                                                                                                                                                                                                                                                                                                                                                                                                                                                                                                                                                                                                                                                                                                                                                                                                                                                                                                                                                                                                                                                                                                                                                                                                                                                                                                                                                                                                                                                                                                                                                                                                                                                                                                                                                                                                                                                                                                                                                                                                                                                                                                                                                                                                                                                                                                                                                                                                                                                                                                                                                                                                                                                                                                                                                                                                                                                                                                                                                                                                                                                                                                                                                                                                                                                                                                                                                                                                                                                                                                                                                                                                                                                                                                                                                                                                                                                                                                                                                                                                                                                                                                                                                                                                                                                                                                                                                                                                                                                                                                                                                                                                                                                                                                                                                                                                                                                                                                                                                             | Laboratory for Molecular Diagnostics,IPHMN                                     | Laboratory for Molecular Diagnostics,IPHMN                                                                | Danijeļa Vujosēvič; Marija Govedarica; Rejhan Hot                                                                                                                                                                                                                                                                                                                                                                                                                                                                                                                                                                                                                                                                                                                                                                                                                                                                                                                                                                  |
| EPI_ISL_9793169, EPI_ISL_9793310, EPI_ISL_9793347, EPI_ISL_9793361                                                                                                                                                                                                                                                                                                                                                                                                                                                                                                                                                                                                                                                                                                                                                                                                                                                                                                                                                                                                                                                                                                                                                                                                                                                                                                                                                                                                                                                                                                                                                                                                                                                                                                                                                                                                                                                                                                                                                                                                                                                                                                                                                                                                                                                                                                                                                                                                                                                                                                                                                                                                                                                                                                                                                                                                                                                                                                                                                                                                                                                                                                                                                                                                                                                                                                                                                                                                                                                                                                                                                                                                                                                                                                                                                                                                                                                                                                                                                                                                                                                                                                                                                                                                                                                                                                                                                                                                                                                                                                                                                                                                                                                                                                                                                                                                                                                                                                                                                                                                                                                                                                                                                                                                                                                                                                                                                                                                                                                                                                                                                                                                                                                                                                                                                                                                                                                                                                                                                                                                                                                                                                                                                                                                                                                                                                                                                                                                                                                                                                                                                                                                                                                                                                                                                                                                                                                                                                                                                                                                                                                                                                                                                                                                                                                                                                                                                                                                                                                                                                                                                                                                                                                                                                                                                                                                                                                                                                                                                                                                                                                                                                                                                                                                                                                                                                                                                                                                                                                                                                                                                                                                                                                                                                                                                                                                                                                                                                                                                                                                                                                                                                                                                                                                                                                                                                                                                                                                                                                                                                                                                                                                                                                                                                                                                                                                                                                                                                                                                                                                                                                                                                                                                                                                                                                                                                                                                                                                                                                                                                                                                                                                                                                                                                                                                                                                                                                                                                                                                                                                                                                                                                                                                                                                                                                                                                                                                                                                                                                                                                                                                                                                                                                                                                                                                                                                                                                                                                                                                                                                                                                                                                                                                                                                                                                                                                                                                                                                                                                                                                                                                                                                                                                                                                                                                                                                                                                                                                                                                                                                                                                                                                                                                                                                                                                                                                                                                                                                                                                                                                                                                                                                                                                                                                                                                                                                                                                                          | Laboratory of Genomics and Bioinformatics, Comenius University Science Park    | Laboratory of Genomics and Bioinformatics, Comenius University Science Park                               | Anna Kaliňková; Barbora Kotvasová; Diana Rusňáková; Jakub Štyk; Jaroslav Budíš; Lucia Ševčíková; Michaela Jakubková Forgáčová; Miroslav Böhmer; Nikola Lipková; Pavol Mišenko; Tatiana Sedláčková; Terézia Vrabľová; Tomáš Szemes                                                                                                                                                                                                                                                                                                                                                                                                                                                                                                                                                                                                                                                                                                                                                                                  |
| EPI_ISL_9571756, EPI_ISL_9617479                                                                                                                                                                                                                                                                                                                                                                                                                                                                                                                                                                                                                                                                                                                                                                                                                                                                                                                                                                                                                                                                                                                                                                                                                                                                                                                                                                                                                                                                                                                                                                                                                                                                                                                                                                                                                                                                                                                                                                                                                                                                                                                                                                                                                                                                                                                                                                                                                                                                                                                                                                                                                                                                                                                                                                                                                                                                                                                                                                                                                                                                                                                                                                                                                                                                                                                                                                                                                                                                                                                                                                                                                                                                                                                                                                                                                                                                                                                                                                                                                                                                                                                                                                                                                                                                                                                                                                                                                                                                                                                                                                                                                                                                                                                                                                                                                                                                                                                                                                                                                                                                                                                                                                                                                                                                                                                                                                                                                                                                                                                                                                                                                                                                                                                                                                                                                                                                                                                                                                                                                                                                                                                                                                                                                                                                                                                                                                                                                                                                                                                                                                                                                                                                                                                                                                                                                                                                                                                                                                                                                                                                                                                                                                                                                                                                                                                                                                                                                                                                                                                                                                                                                                                                                                                                                                                                                                                                                                                                                                                                                                                                                                                                                                                                                                                                                                                                                                                                                                                                                                                                                                                                                                                                                                                                                                                                                                                                                                                                                                                                                                                                                                                                                                                                                                                                                                                                                                                                                                                                                                                                                                                                                                                                                                                                                                                                                                                                                                                                                                                                                                                                                                                                                                                                                                                                                                                                                                                                                                                                                                                                                                                                                                                                                                                                                                                                                                                                                                                                                                                                                                                                                                                                                                                                                                                                                                                                                                                                                                                                                                                                                                                                                                                                                                                                                                                                                                                                                                                                                                                                                                                                                                                                                                                                                                                                                                                                                                                                                                                                                                                                                                                                                                                                                                                                                                                                                                                                                                                                                                                                                                                                                                                                                                                                                                                                                                                                                                                                                                                                                                                                                                                                                                                                                                                                                                                                                                                                                                            | Laboratory of Respiratory Viruses and Measles, Oswaldo Cruz Institute, FIOCRUZ | Laboratory of Respiratory Viruses and Measles, Oswaldo Cruz Institute, FIOCRUZ                            | Alice Sampaio Rocha; Bruna Mendonça da Silva; Elisa Cavalcante Pereira; Fernando Motta; Igor Arantes; Jéssica Graça Macedo de Carvalho; Larissa Macedo Pinto; Luciana Apolinario; Marilda Siqueira on behalf of the Fiocruz COVID-19 Genomic Surveillance Network; Paola Resende; Victor Guimaraes                                                                                                                                                                                                                                                                                                                                                                                                                                                                                                                                                                                                                                                                                                                 |
| EPI_ISL_9445894                                                                                                                                                                                                                                                                                                                                                                                                                                                                                                                                                                                                                                                                                                                                                                                                                                                                                                                                                                                                                                                                                                                                                                                                                                                                                                                                                                                                                                                                                                                                                                                                                                                                                                                                                                                                                                                                                                                                                                                                                                                                                                                                                                                                                                                                                                                                                                                                                                                                                                                                                                                                                                                                                                                                                                                                                                                                                                                                                                                                                                                                                                                                                                                                                                                                                                                                                                                                                                                                                                                                                                                                                                                                                                                                                                                                                                                                                                                                                                                                                                                                                                                                                                                                                                                                                                                                                                                                                                                                                                                                                                                                                                                                                                                                                                                                                                                                                                                                                                                                                                                                                                                                                                                                                                                                                                                                                                                                                                                                                                                                                                                                                                                                                                                                                                                                                                                                                                                                                                                                                                                                                                                                                                                                                                                                                                                                                                                                                                                                                                                                                                                                                                                                                                                                                                                                                                                                                                                                                                                                                                                                                                                                                                                                                                                                                                                                                                                                                                                                                                                                                                                                                                                                                                                                                                                                                                                                                                                                                                                                                                                                                                                                                                                                                                                                                                                                                                                                                                                                                                                                                                                                                                                                                                                                                                                                                                                                                                                                                                                                                                                                                                                                                                                                                                                                                                                                                                                                                                                                                                                                                                                                                                                                                                                                                                                                                                                                                                                                                                                                                                                                                                                                                                                                                                                                                                                                                                                                                                                                                                                                                                                                                                                                                                                                                                                                                                                                                                                                                                                                                                                                                                                                                                                                                                                                                                                                                                                                                                                                                                                                                                                                                                                                                                                                                                                                                                                                                                                                                                                                                                                                                                                                                                                                                                                                                                                                                                                                                                                                                                                                                                                                                                                                                                                                                                                                                                                                                                                                                                                                                                                                                                                                                                                                                                                                                                                                                                                                                                                                                                                                                                                                                                                                                                                                                                                                                                                                                                                             | Landesgesundheitsamt Baden-Württemberg                                         | Robert Koch Institute                                                                                     |                                                                                                                                                                                                                                                                                                                                                                                                                                                                                                                                                                                                                                                                                                                                                                                                                                                                                                                                                                                                                    |
| EPI_ISL_9123012, EPI_ISL_9123071, EPI_ISL_9528594, EPI_ISL_9613549, EPI_ISL_9613551, EPI_ISL_9613557, EPI_ISL_9613575, EPI_ISL_9613576, EPI_ISL_9613578, EPI_ISL_9613583, EPI_ISL_9613585, EPI_ISL_9613596, EPI_ISL_9613617, EPI_ISL_9613621, EPI_ISL_9613624, EPI_ISL_9613628                                                                                                                                                                                                                                                                                                                                                                                                                                                                                                                                                                                                                                                                                                                                                                                                                                                                                                                                                                                                                                                                                                                                                                                                                                                                                                                                                                                                                                                                                                                                                                                                                                                                                                                                                                                                                                                                                                                                                                                                                                                                                                                                                                                                                                                                                                                                                                                                                                                                                                                                                                                                                                                                                                                                                                                                                                                                                                                                                                                                                                                                                                                                                                                                                                                                                                                                                                                                                                                                                                                                                                                                                                                                                                                                                                                                                                                                                                                                                                                                                                                                                                                                                                                                                                                                                                                                                                                                                                                                                                                                                                                                                                                                                                                                                                                                                                                                                                                                                                                                                                                                                                                                                                                                                                                                                                                                                                                                                                                                                                                                                                                                                                                                                                                                                                                                                                                                                                                                                                                                                                                                                                                                                                                                                                                                                                                                                                                                                                                                                                                                                                                                                                                                                                                                                                                                                                                                                                                                                                                                                                                                                                                                                                                                                                                                                                                                                                                                                                                                                                                                                                                                                                                                                                                                                                                                                                                                                                                                                                                                                                                                                                                                                                                                                                                                                                                                                                                                                                                                                                                                                                                                                                                                                                                                                                                                                                                                                                                                                                                                                                                                                                                                                                                                                                                                                                                                                                                                                                                                                                                                                                                                                                                                                                                                                                                                                                                                                                                                                                                                                                                                                                                                                                                                                                                                                                                                                                                                                                                                                                                                                                                                                                                                                                                                                                                                                                                                                                                                                                                                                                                                                                                                                                                                                                                                                                                                                                                                                                                                                                                                                                                                                                                                                                                                                                                                                                                                                                                                                                                                                                                                                                                                                                                                                                                                                                                                                                                                                                                                                                                                                                                                                                                                                                                                                                                                                                                                                                                                                                                                                                                                                                                                                                                                                                                                                                                                                                                                                                                                                                                                                                                                                                                              | Lifebrain Covid Labor GmbH                                                     | Lifebrain Covid Labor GmbH                                                                                | Alexandra Wagner; Anna Edermayr; Filip Sima                                                                                                                                                                                                                                                                                                                                                                                                                                                                                                                                                                                                                                                                                                                                                                                                                                                                                                                                                                        |
| EPI_ISL_9022401, EPI_ISL_9022098, EPI_ISL_9022125, EPI_ISL_9024435, EPI_ISL_9068089, EPI_ISL_9068427, EPI_ISL_9070929, EPI_ISL_9071101, EPI_ISL_9071123, EPI_ISL_9071206, EPI_ISL_9071223, EPI_ISL_9071293, EPI_ISL_9073990, EPI_ISL_9076616, EPI_ISL_9076718, EPI_ISL_9077119, EPI_ISL_9077149, EPI_ISL_9077395, EPI_ISL_9112503, EPI_ISL_9113806, EPI_ISL_9113920, EPI_ISL_9114144, EPI_ISL_9114416, EPI_ISL_9114263, EPI_ISL_9114321, EPI_ISL_9114364, EPI_ISL_9114489, EPI_ISL_9115108, EPI_ISL_9115176, EPI_ISL_9115325, EPI_ISL_9117261, EPI_ISL_9117641, EPI_ISL_9117966, EPI_ISL_9118174, EPI_ISL_9118363, EPI_ISL_9118679, EPI_ISL_9122939, EPI_ISL_9123053, EPI_ISL_9123073, EPI_ISL_9123082, EPI_ISL_9123085, EPI_ISL_9123088, EPI_ISL_9123092, EPI_ISL_9123151, EPI_ISL_9123152, EPI_ISL_9123153, EPI_ISL_9123154, EPI_ISL_9123155, EPI_ISL_9123156, EPI_ISL_9123157, EPI_ISL_9123158, EPI_ISL_9123159, EPI_ISL_9123160, EPI_ISL_9123161, EPI_ISL_9123162, EPI_ISL_9123163, EPI_ISL_9123164, EPI_ISL_9123165, EPI_ISL_9123166, EPI_ISL_9123167, EPI_ISL_9123168, EPI_ISL_9123169, EPI_ISL_9123170, EPI_ISL_9123171, EPI_ISL_9123172, EPI_ISL_9123173, EPI_ISL_9123174, EPI_ISL_9123175, EPI_ISL_9123176, EPI_ISL_9123177, EPI_ISL_9123178, EPI_ISL_9123179, EPI_ISL_9123180, EPI_ISL_9123181, EPI_ISL_9123182, EPI_ISL_9123183, EPI_ISL_9123184, EPI_ISL_9123185, EPI_ISL_9123186, EPI_ISL_9123187, EPI_ISL_9123188, EPI_ISL_9123189, EPI_ISL_9123190, EPI_ISL_9123191, EPI_ISL_9123192, EPI_ISL_9123193, EPI_ISL_9123194, EPI_ISL_9123195, EPI_ISL_9123196, EPI_ISL_9123197, EPI_ISL_9123198, EPI_ISL_9123199, EPI_ISL_9123200, EPI_ISL_9123201, EPI_ISL_9123202, EPI_ISL_9123203, EPI_ISL_9123204, EPI_ISL_9123205, EPI_ISL_9123206, EPI_ISL_9123207, EPI_ISL_9123208, EPI_ISL_9123209, EPI_ISL_9123210, EPI_ISL_9123211, EPI_ISL_9123212, EPI_ISL_9123213, EPI_ISL_9123214, EPI_ISL_9123215, EPI_ISL_9123216, EPI_ISL_9123217, EPI_ISL_9123218, EPI_ISL_9123219, EPI_ISL_9123220, EPI_ISL_9123221, EPI_ISL_9123222, EPI_ISL_9123223, EPI_ISL_9123224, EPI_ISL_9123225, EPI_ISL_9123226, EPI_ISL_9123227, EPI_ISL_9123228, EPI_ISL_9123229, EPI_ISL_9123230, EPI_ISL_9123231, EPI_ISL_9123232, EPI_ISL_9123233, EPI_ISL_9123234, EPI_ISL_9123235, EPI_ISL_9123236, EPI_ISL_9123237, EPI_ISL_9123238, EPI_ISL_9123239, EPI_ISL_9123240, EPI_ISL_9123241, EPI_ISL_9123242, EPI_ISL_9123243, EPI_ISL_9123244, EPI_ISL_9123245, EPI_ISL_9123246, EPI_ISL_9123247, EPI_ISL_9123248, EPI_ISL_9123249, EPI_ISL_9123250, EPI_ISL_9123251, EPI_ISL_9123252, EPI_ISL_9123253, EPI_ISL_9123254, EPI_ISL_9123255, EPI_ISL_9123256, EPI_ISL_9123257, EPI_ISL_9123258, EPI_ISL_9123259, EPI_ISL_9123260, EPI_ISL_9123261, EPI_ISL_9123262, EPI_ISL_9123263, EPI_ISL_9123264, EPI_ISL_9123265, EPI_ISL_9123266, EPI_ISL_9123267, EPI_ISL_9123268, EPI_ISL_9123269, EPI_ISL_9123270, EPI_ISL_9123271, EPI_ISL_9123272, EPI_ISL_9123273, EPI_ISL_9123274, EPI_ISL_9123275, EPI_ISL_9123276, EPI_ISL_9123277, EPI_ISL_9123278, EPI_ISL_9123279, EPI_ISL_9123280, EPI_ISL_9123281, EPI_ISL_9123282, EPI_ISL_9123283, EPI_ISL_9123284, EPI_ISL_9123285, EPI_ISL_9123286, EPI_ISL_9123287, EPI_ISL_9123288, EPI_ISL_9123289, EPI_ISL_9123290, EPI_ISL_9123291, EPI_ISL_9123292, EPI_ISL_9123293, EPI_ISL_9123294, EPI_ISL_9123295, EPI_ISL_9123296, EPI_ISL_9123297, EPI_ISL_9123298, EPI_ISL_9123299, EPI_ISL_9123300, EPI_ISL_9123301, EPI_ISL_9123302, EPI_ISL_9123303, EPI_ISL_9123304, EPI_ISL_9123305, EPI_ISL_9123306, EPI_ISL_9123307, EPI_ISL_9123308, EPI_ISL_9123309, EPI_ISL_9123310, EPI_ISL_9123311, EPI_ISL_9123312, EPI_ISL_9123313, EPI_ISL_9123314, EPI_ISL_9123315, EPI_ISL_9123316, EPI_ISL_9123317, EPI_ISL_9123318, EPI_ISL_9123319, EPI_ISL_9123320, EPI_ISL_9123321, EPI_ISL_9123322, EPI_ISL_9123323, EPI_ISL_9123324, EPI_ISL_9123325, EPI_ISL_9123326, EPI_ISL_9123327, EPI_ISL_9123328, EPI_ISL_9123329, EPI_ISL_9123330, EPI_ISL_9123331, EPI_ISL_9123332, EPI_ISL_9123333, EPI_ISL_9123334, EPI_ISL_9123335, EPI_ISL_9123336, EPI_ISL_9123337, EPI_ISL_9123338, EPI_ISL_9123339, EPI_ISL_9123340, EPI_ISL_9123341, EPI_ISL_9123342, EPI_ISL_9123343, EPI_ISL_9123344, EPI_ISL_9123345, EPI_ISL_9123346, EPI_ISL_9123347, EPI_ISL_9123348, EPI_ISL_9123349, EPI_ISL_9123350, EPI_ISL_9123351, EPI_ISL_9123352, EPI_ISL_9123353, EPI_ISL_9123354, EPI_ISL_9123355, EPI_ISL_9123356, EPI_ISL_9123357, EPI_ISL_9123358, EPI_ISL_9123359, EPI_ISL_9123360, EPI_ISL_9123361, EPI_ISL_9123362, EPI_ISL_9123363, EPI_ISL_9123364, EPI_ISL_9123365, EPI_ISL_9123366, EPI_ISL_9123367, EPI_ISL_9123368, EPI_ISL_9123369, EPI_ISL_9123370, EPI_ISL_9123371, EPI_ISL_9123372, EPI_ISL_9123373, EPI_ISL_9123374, EPI_ISL_9123375, EPI_ISL_9123376, EPI_ISL_9123377, EPI_ISL_9123378, EPI_ISL_9123379, EPI_ISL_9123380, EPI_ISL_9123381, EPI_ISL_9123382, EPI_ISL_9123383, EPI_ISL_9123384, EPI_ISL_9123385, EPI_ISL_9123386, EPI_ISL_9123387, EPI_ISL_9123388, EPI_ISL_9123389, EPI_ISL_9123390, EPI_ISL_9123391, EPI_ISL_9123392, EPI_ISL_9123393, EPI_ISL_9123394, EPI_ISL_9123395, EPI_ISL_9123396, EPI_ISL_9123397, EPI_ISL_9123398, EPI_ISL_9123399, EPI_ISL_9123400, EPI_ISL_9123401, EPI_ISL_9123402, EPI_ISL_9123403, EPI_ISL_9123404, EPI_ISL_9123405, EPI_ISL_9123406, EPI_ISL_9123407, EPI_ISL_9123408, EPI_ISL_9123409, EPI_ISL_9123410, EPI_ISL_9123411, EPI_ISL_9123412, EPI_ISL_9123413, EPI_ISL_9123414, EPI_ISL_9123415, EPI_ISL_9123416, EPI_ISL_9123417, EPI_ISL_9123418, EPI_ISL_9123419, EPI_ISL_9123420, EPI_ISL_9123421, EPI_ISL_9123422, EPI_ISL_9123423, EPI_ISL_9123424, EPI_ISL_9123425, EPI_ISL_9123426, EPI_ISL_9123427, EPI_ISL_9123428, EPI_ISL_9123429, EPI_ISL_9123430, EPI_ISL_9123431, EPI_ISL_9123432, EPI_ISL_9123433, EPI_ISL_9123434, EPI_ISL_9123435, EPI_ISL_9123436, EPI_ISL_9123437, EPI_ISL_9123438, EPI_ISL_9123439, EPI_ISL_9123440, EPI_ISL_9123441, EPI_ISL_9123442, EPI_ISL_9123443, EPI_ISL_9123444, EPI_ISL_9123445, EPI_ISL_9123446, EPI_ISL_9123447, EPI_ISL_9123448, EPI_ISL_9123449, EPI_ISL_9123450, EPI_ISL_9123451, EPI_ISL_9123452, EPI_ISL_9123453, EPI_ISL_9123454, EPI_ISL_9123455, EPI_ISL_9123456, EPI_ISL_9123457, EPI_ISL_9123458, EPI_ISL_9123459, EPI_ISL_9123460, EPI_ISL_9123461, EPI_ISL_9123462, EPI_ISL_9123463, EPI_ISL_9123464, EPI_ISL_9123465, EPI_ISL_9123466, EPI_ISL_9123467, EPI_ISL_9123468, EPI_ISL_9123469, EPI_ISL_9123470, EPI_ISL_9123471, EPI_ISL_9123472, EPI_ISL_9123473, EPI_ISL_9123474, EPI_ISL_9123475, EPI_ISL_9123476, EPI_ISL_9123477, EPI_ISL_9123478, EPI_ISL_9123479, EPI_ISL_9123480, EPI_ISL_9123481, EPI_ISL_9123482, EPI_ISL_9123483, EPI_ISL_9123484, EPI_ISL_9123485, EPI_ISL_9123486, EPI_ISL_9123487, EPI_ISL_9123488, EPI_ISL_9123489, EPI_ISL_9123490, EPI_ISL_9123491, EPI_ISL_9123492, EPI_ISL_9123493, EPI_ISL_9123494, EPI_ISL_9123495, EPI_ISL_9123496, EPI_ISL_9123497, EPI_ISL_9123498, EPI_ISL_9123499, EPI_ISL_9123500, EPI_ISL_9123501, EPI_ISL_9123502, EPI_ISL_9123503, EPI_ISL_9123504, EPI_ISL_9123505, EPI_ISL_9123506, EPI_ISL_9123507, EPI_ISL_9123508, EPI_ISL_9123509, EPI_ISL_9123510, EPI_ISL_9123511, EPI_ISL_9123512, EPI_ISL_9123513, EPI_ISL_9123514, EPI_ISL_9123515, EPI_ISL_9123516, EPI_ISL_9123517, EPI_ISL_9123518, EPI_ISL_9123519, EPI_ISL_9123520, EPI_ISL_9123521, EPI_ISL_9123522, EPI_ISL_9123523, EPI_ISL_9123524, EPI_ISL_9123525, EPI_ISL_9123526, EPI_ISL_9123527, EPI_ISL_9123528, EPI_ISL_9123529, EPI_ISL_9123530, EPI_ISL_9123531, EPI_ISL_9123532, EPI_ISL_9123533, EPI_ISL_9123534, EPI_ISL_9123535, EPI_ISL_9123536, EPI_ISL_9123537, EPI_ISL_9123538, EPI_ISL_9123539, EPI_ISL_9123540, EPI_ISL_9123541, EPI_ISL_9123542, EPI_ISL_9123543, EPI_ISL_9123544, EPI_ISL_9123545, EPI_ISL_9123546, EPI_ISL_9123547, EPI_ISL_9123548, EPI_ISL_9123549, EPI_ISL_9123550, EPI_ISL_9123551, EPI_ISL_9123552, EPI_ISL_9123553, EPI_ISL_9123554, EPI_ISL_9123555, EPI_ISL_9123556, EPI_ISL_9123557, EPI_ISL_9123558, EPI_ISL_9123559, EPI_ISL_9123560, EPI_ISL_9123561, EPI_ISL_9123562, EPI_ISL_9123563, EPI_ISL_9123564, EPI_ISL_9123565, EPI_ISL_9123566, EPI_ISL_9123567, EPI_ISL_9123568, EPI_ISL_9123569, EPI_ISL_9123570, EPI_ISL_9123571, EPI_ISL_9123572, EPI_ISL_9123573, EPI_ISL_9123574, EPI_ISL_9123575, EPI_ISL_9123576, EPI_ISL_9123577, EPI_ISL_9123578, EPI_ISL_9123579, EPI_ISL_9123580, EPI_ISL_9123581, EPI_ISL_9123582, EPI_ISL_9123583, EPI_ISL_9123584, EPI_ISL_9123585, EPI_ISL_9123586, EPI_ISL_9123587, EPI_ISL_9123588, EPI_ISL_9123589, EPI_ISL_9123590, EPI_ISL_9123591, EPI_ISL_9123592, EPI_ISL_9123593, EPI_ISL_9123594, EPI_ISL_9123595, EPI_ISL_9123596, EPI_ISL_9123597, EPI_ISL_9123598, EPI_ISL_9123599, EPI_ISL_9123600, EPI_ISL_9123601, EPI_ISL_9123602, EPI_ISL_9123603, EPI_ISL_9123604, EPI_ISL_9123605, EPI_ISL_9123606, EPI_ISL_9123607, EPI_ISL_9123608, EPI_ISL_9123609, EPI_ISL_9123610, EPI_ISL_9123611, EPI_ISL_9123612, EPI_ISL_9123613, EPI_ISL_9123614, EPI_ISL_9123615, EPI_ISL_9123616, EPI_ISL_9123617, EPI_ISL_9123618, EPI_ISL_9123619, EPI_ISL_9123620, EPI_ISL_9123621, EPI_ISL_9123622, EPI_ISL_9123623, EPI_ISL_9123624, EPI_ISL_9123625, EPI_ISL_9123626, EPI_ISL_9123627, EPI_ISL_9123628, EPI_ISL_9123629, EPI_ISL_9123630, EPI_ISL_9123631, EPI_ISL_9123632, EPI_ISL_9123633, EPI_ISL_9123634, EPI_ISL_9123635, EPI_ISL_9123636, EPI_ISL_9123637, EPI_ISL_9123638, EPI_ISL_9123639, EPI_ISL_9123640, EPI_ISL_9123641, EPI_ISL_9123642, EPI_ISL_9123643, EPI_ISL_9123644, EPI_ISL_9123645, EPI_ISL_9123646, EPI_ISL_9123647, EPI_ISL_9123648, EPI_ISL_9123649, EPI_ISL_9123650, EPI_ISL_9123651, EPI_ISL_9123652, EPI_ISL_9123653, EPI_ISL_9123654, EPI_ISL_9123655, EPI_ISL_9123656, EPI_ISL_9123657, EPI_ISL_9123658, EPI_ISL_9123659, EPI_ISL_9123660, EPI_ISL_9123661, EPI_ISL_9123662, EPI_ISL_9123663, EPI_ISL_9123664, EPI_ISL_9123665, EPI_ISL_9123666, EPI_ISL_9123667, EPI_ISL_9123668, EPI_ISL_9123669, EPI_ISL_9123670, EPI_ISL_9123671, EPI_ISL_9123672, EPI_ISL_9123673, EPI_ISL_9123674, EPI_ISL_9123675, EPI_ISL_9123676, EPI_ISL_9123677, EPI_ISL_9123678, EPI_ISL_9123679, EPI_ISL_9123680, EPI_ISL_9123681, EPI_ISL_9123682, EPI_ISL_9123683, EPI_ISL_9123684, EPI_ISL_9123685, EPI_ISL_9123686, EPI_ISL_9123687, EPI_ISL_9123688, EPI_ISL_9123689, EPI_ISL_9123690, EPI_ISL_9123691, EPI_ISL_9123692, EPI_ISL_9123693, EPI_ISL_9123694, EPI_ISL_9123695, EPI_ISL_9123696, EPI_ISL_9123697, EPI_ISL_9123698, EPI_ISL_9123699, EPI_ISL_9123700, EPI_ISL_9123701, EPI_ISL_9123702, EPI_ISL_9123703, EPI_ISL_9123704, EPI_ISL_9123705, EPI_ISL_9123706, EPI_ISL_9123707, EPI_ISL_9123708, EPI_ISL_9123709, EPI_ISL_9123710, EPI_ISL_9123711, EPI_ISL_9123712, EPI_ISL_9123713, EPI_ISL_9123714, EPI_ISL_9123715, EPI_ISL_9123716, EPI_ISL_9123717, EPI_ISL_9123718, EPI_ISL_9123719, EPI_ISL_9123720, EPI_ISL_9123721, EPI_ISL_9123722, EPI_ISL_9123723, EPI_ISL_9123724, EPI_ISL_9123725, EPI_ISL_9123726, EPI_ISL_9123727, EPI_ISL_9123728, EPI_ISL_9123729, EPI_ISL_9123730, EPI_ISL_9123731, EPI_ISL_9123732, EPI_ISL_9123733, EPI_ISL_9123734, EPI_ISL_9123735, EPI_ISL_9123736, EPI_ISL_9123737, EPI_ISL_9123738, EPI_ISL_9123739, EPI_ISL_9123740, EPI_ISL_9123741, EPI_ISL_9123742, EPI_ISL_9123743, EPI_ISL_9123744, EPI_ISL_9123745, EPI_ISL_9123746, EPI_ISL_9123747, EPI_ISL_9123748, EPI_ISL_9123749, EPI_ISL_9123750, EPI_ISL_9123751, EPI_ISL_9123752, EPI_ISL_9123753, EPI_ISL_9123754, EPI_ISL_9123755, EPI_ISL_9123756, EPI_ISL_9123757, EPI_ISL_9123758, EPI_ISL_9123759, EPI_ISL_9123760, EPI_ISL_9123761, EPI_ISL_9123762, EPI_ISL_9123763, EPI_ISL_9123764, EPI_ISL_9123765, EPI_ISL_9123766, EPI_ISL_9123767, EPI_ISL_9123768, EPI_ISL_9123769, EPI_ISL_9123770, EPI_ISL_9123771, EPI_ISL_9123772, EPI_ISL_9123773, EPI_ISL_9123774, EPI_ISL_9123775, EPI_ISL_9123776, EPI_ISL_9123777, EPI_ISL_9123778, EPI_ISL_9123779, EPI_ISL_9123780, EPI_ISL_9123781, EPI_ISL_9123782, EPI_ISL_9123783, EPI_ISL_9123784, EPI_ISL_9123785, EPI_ISL_9123786, EPI_ISL_9123787, EPI_ISL_9123788, EPI_ISL_9123789, EPI_ISL_9123790, EPI_ISL_9123791, EPI_ISL_9123792, EPI_ISL_9123793, EPI_ISL_9123794, EPI_ISL_9123795, EPI_ISL_9123796, EPI_ISL_9123797, EPI_ISL_9123798, EPI_ISL_9123799, EPI_ISL_9123800, EPI_ISL_9123801, EPI_ISL_9123802, EPI_ISL_9123803, EPI_ISL_9123804, EPI_ISL_9123805, EPI_ISL_9123806, EPI_ISL_9123807, EPI_ISL_9123808, EPI_ISL_9123809, EPI_ISL_9123810, EPI_ISL_9123811, EPI_ISL_9123812, EPI_ISL_9123813, EPI_ISL_9123814, EPI_ISL_9123815, EPI_ISL_9123816, EPI_ISL_9123817, EPI_ISL_9123818, EPI_ISL_9123819, EPI_ISL_9123820, EPI_ISL_9123821, EPI_ISL_9123822, EPI_ISL_9123823, EPI_ISL_9123824, EPI_ISL_9123825, EPI_ISL_9123826, EPI_ISL_9123827, EPI_ISL_9123828, EPI_ISL_9123829, EPI_ISL_9123830, EPI_ISL_9123831, EPI_ISL_9123832, EPI_ISL_9123833, EPI_ISL_9123834, EPI_ISL_9123835, EPI_ISL_9123836, EPI_ISL_9123837, EPI_ISL_9123838, EPI_ISL_9123839, EPI_ISL_9123840, EPI_ISL_9123841, EPI_ISL_9123842, EPI_ISL_9123843, EPI_ISL_9123844, EPI_ISL_9123845, EPI_ISL_9123846, EPI_ISL_9123847, EPI_ISL_9123848, EPI_ISL_9123849, EPI_ISL_9123850, EPI_ISL_9123851, EPI_ISL_9123852, EPI_ISL_9123853, EPI_ISL_9123854, EPI_ISL_9123855, EPI_ISL_9123856, EPI_ISL_9123857, EPI_ISL_9123858, EPI_ISL_9123859, EPI_ISL_9123860, EPI_ISL_9123861, EPI_ISL_9123862, EPI_ISL_9123863, EPI_ISL_9123864, EPI_ISL_9123865, EPI_ISL_9123866, EPI_ISL_9123867, EPI_ISL_9123868, EPI_ISL_9123869, EPI_ISL_9123870, EPI_ISL_9123871, EPI_ISL_9123872, EPI_ISL_9123873, EPI_ISL_9123874, EPI_ISL_9123875, EPI_ISL_9123876, EPI_ISL_9123877, EPI_ISL_9123878, EPI_ISL_9123879, EPI_ISL_9123880, EPI_ISL_9123881, EPI_ISL_9123882, EPI_ISL_9123883, EPI_ISL_9123884, EPI_ISL_9123885, EPI_ISL_9123886, EPI_ISL_9123887, EPI_ISL_9123888, EPI_ISL_9123889, EPI_ISL_9123890, EPI_ISL_9123891, EPI_ISL_9123892, EPI_ISL_9123893, EPI_ISL_9123894, EPI_ISL_ |                                                                                |                                                                                                           |                                                                                                                                                                                                                                                                                                                                                                                                                                                                                                                                                                                                                                                                                                                                                                                                                                                                                                                                                                                                                    |



|                                                                                                                                                                                                                                                                                                                                                                                                                                                                                                                                                                                                                                                                                                                                                                                                                                                                                                                                                                                                                                                            |                                                                             |                                                                                                                                                                                                                                                                                                                                                                                                                                                                                                                                                   |                                                                                                                                                                                                                                                                                                                                                                                                                                                                                                                                                                                                                                                                                                        |
|------------------------------------------------------------------------------------------------------------------------------------------------------------------------------------------------------------------------------------------------------------------------------------------------------------------------------------------------------------------------------------------------------------------------------------------------------------------------------------------------------------------------------------------------------------------------------------------------------------------------------------------------------------------------------------------------------------------------------------------------------------------------------------------------------------------------------------------------------------------------------------------------------------------------------------------------------------------------------------------------------------------------------------------------------------|-----------------------------------------------------------------------------|---------------------------------------------------------------------------------------------------------------------------------------------------------------------------------------------------------------------------------------------------------------------------------------------------------------------------------------------------------------------------------------------------------------------------------------------------------------------------------------------------------------------------------------------------|--------------------------------------------------------------------------------------------------------------------------------------------------------------------------------------------------------------------------------------------------------------------------------------------------------------------------------------------------------------------------------------------------------------------------------------------------------------------------------------------------------------------------------------------------------------------------------------------------------------------------------------------------------------------------------------------------------|
| EPI_ISL_9508881,<br>EPI_ISL_9509651                                                                                                                                                                                                                                                                                                                                                                                                                                                                                                                                                                                                                                                                                                                                                                                                                                                                                                                                                                                                                        | Narodowy Instytut Zdrowia Publicznego - PZH                                 | Institute of Hygiene, Warsaw, Poland<br>1. Academic Center for Pathomorphological and Genetic-Molecular Diagnostics Ltd, Białystok, Poland<br>2. National Institute of Public Health - National Institute of Hygiene, Warsaw, Poland                                                                                                                                                                                                                                                                                                              | Anetta Sulewska; Jacek Nikliński; Janusz Dzięcioł; Joanna Kiśluk; Katarzyna Zacharczuk; Konrad Raczkowski; Magdalena Nowakowska; Małgorzata Sadkowska-Todys; Piotr Karabowicz; Piotr Majewski; Przemysław Bieчек. Joanna Reszeć; Radosław Charkiewicz; Tomasz Wołkowicz                                                                                                                                                                                                                                                                                                                                                                                                                                |
| EPI_ISL_9468209,<br>EPI_ISL_9468254,<br>EPI_ISL_9468259                                                                                                                                                                                                                                                                                                                                                                                                                                                                                                                                                                                                                                                                                                                                                                                                                                                                                                                                                                                                    | National Center of Infectious and Parasitic Diseases                        | National Center of Infectious and Parasitic Diseases                                                                                                                                                                                                                                                                                                                                                                                                                                                                                              | Alexiev et al                                                                                                                                                                                                                                                                                                                                                                                                                                                                                                                                                                                                                                                                                          |
| EPI_ISL_9413683,<br>EPI_ISL_9413687,<br>EPI_ISL_9413688,<br>EPI_ISL_9413689,<br>EPI_ISL_9413691                                                                                                                                                                                                                                                                                                                                                                                                                                                                                                                                                                                                                                                                                                                                                                                                                                                                                                                                                            | National Health Laboratory Services, Virology                               | National Health Laboratory Services, Virology                                                                                                                                                                                                                                                                                                                                                                                                                                                                                                     | Avani Bharuthram; Florette K. Treurnicht; Kathleen Subramoney; Nkhensani Mtleni                                                                                                                                                                                                                                                                                                                                                                                                                                                                                                                                                                                                                        |
| EPI_ISL_9463942                                                                                                                                                                                                                                                                                                                                                                                                                                                                                                                                                                                                                                                                                                                                                                                                                                                                                                                                                                                                                                            | National Laboratory for Health, Environment and Food, OMM, Novo mesto       | Department for Public Health Microbiology Ljubljana, National Laboratory for Health, Environment and Food                                                                                                                                                                                                                                                                                                                                                                                                                                         | Aleksander Kocuvan; Aleksander Mahnic; Alenka Štorman; Daša Kavka; Kaja Tominc; Maja Rupnik; Martin Bosilj; Mateja Borinc; Maša Jarčič; Nika Gobec; Sandra Janežic; Tjaša Zohar Čretnik; Tom Koritnik                                                                                                                                                                                                                                                                                                                                                                                                                                                                                                  |
| EPI_ISL_8927257, EPI_ISL_8927258, EPI_ISL_8927261, EPI_ISL_8927262, EPI_ISL_8927263, EPI_ISL_8927264, EPI_ISL_8927267, EPI_ISL_8927268, EPI_ISL_8927269, EPI_ISL_8927274, EPI_ISL_8927275, EPI_ISL_8927277, EPI_ISL_8927278, EPI_ISL_8927282, EPI_ISL_8927283, EPI_ISL_8927285, EPI_ISL_8927287, EPI_ISL_8927288, EPI_ISL_8927291, EPI_ISL_8927292, EPI_ISL_8927293, EPI_ISL_9076079, EPI_ISL_9076080, EPI_ISL_9076081, EPI_ISL_9076082, EPI_ISL_9076083, EPI_ISL_9076084, EPI_ISL_9076085, EPI_ISL_9076086, EPI_ISL_9076087, EPI_ISL_9076088, EPI_ISL_9076089, EPI_ISL_9076090, EPI_ISL_9076091, EPI_ISL_9076092, EPI_ISL_9076093, EPI_ISL_9076094, EPI_ISL_9076096, EPI_ISL_9076097, EPI_ISL_9076098, EPI_ISL_9076099, EPI_ISL_9076100, EPI_ISL_9076101, EPI_ISL_9076102, EPI_ISL_9076103, EPI_ISL_9076104, EPI_ISL_9076105, EPI_ISL_9076106, EPI_ISL_9076107, EPI_ISL_9076108, EPI_ISL_9076109, EPI_ISL_9076110, EPI_ISL_9438155, EPI_ISL_9438158, EPI_ISL_9438161, EPI_ISL_9438170, EPI_ISL_9438177, EPI_ISL_9438181, EPI_ISL_9596942, EPI_ISL_9596946 | National Public Health Laboratory, National Centre for Infectious Diseases  | Benny Yeo; Grace Ngan; Lin Cui; Raymond Tzer Pin Lin; Royce Ang; Samuel Loo; Yichen Ding; Zhenyang Zhou                                                                                                                                                                                                                                                                                                                                                                                                                                           |                                                                                                                                                                                                                                                                                                                                                                                                                                                                                                                                                                                                                                                                                                        |
| EPI_ISL_9779445, EPI_ISL_9779446, EPI_ISL_9779447, EPI_ISL_9779448, EPI_ISL_9779449, EPI_ISL_9779450, EPI_ISL_9779451, EPI_ISL_9779452, EPI_ISL_9779453, EPI_ISL_9779454, EPI_ISL_9779455, EPI_ISL_9779456, EPI_ISL_9779457, EPI_ISL_9779458, EPI_ISL_9779460, EPI_ISL_9779461, EPI_ISL_9779462, EPI_ISL_9779463, EPI_ISL_9779464, EPI_ISL_9779465, EPI_ISL_9779466, EPI_ISL_9779467                                                                                                                                                                                                                                                                                                                                                                                                                                                                                                                                                                                                                                                                       | see above                                                                   | Nizam's Institute of Medical Sciences                                                                                                                                                                                                                                                                                                                                                                                                                                                                                                             | Arunkumar Karunanidhi; Ashwin Dalal; Asmita Gupta; Divya Vashista; Murali Bhashyam; Nagamani Kammili; Rupin Shelake; Vinay Donipadi                                                                                                                                                                                                                                                                                                                                                                                                                                                                                                                                                                    |
| EPI_ISL_9023175, EPI_ISL_9236171, EPI_ISL_9236187, EPI_ISL_9236189, EPI_ISL_9236255, EPI_ISL_9236256, EPI_ISL_9236257, EPI_ISL_9604319, EPI_ISL_9604337, EPI_ISL_9604340, EPI_ISL_9610181, EPI_ISL_9610182, EPI_ISL_9610244                                                                                                                                                                                                                                                                                                                                                                                                                                                                                                                                                                                                                                                                                                                                                                                                                                | see above                                                                   | Northstar Pathology Laboratory, Ahmedabad                                                                                                                                                                                                                                                                                                                                                                                                                                                                                                         | Akhilesh Modi; Apurvasinh Puvar; Bhadreshsinh Gohil; Chaitanya Joshi; Dhava; Disha Vora; Janvi Raval; Jaykumar Rangani; Kanupriya; Madhvi Joshi; Netta Khandelwal; Nimesh Patel; Nitin Savaliya; NitinShukla; Priyank Chavda; Ramesh Pandit; Roshani Mishra; Sonal Sharma; Tasnim Trivedi; Zarna Patel                                                                                                                                                                                                                                                                                                                                                                                                 |
| EPI_ISL_9554945, EPI_ISL_9554969, EPI_ISL_9555119, EPI_ISL_9555140, EPI_ISL_9556853, EPI_ISL_9556890, EPI_ISL_9556896, EPI_ISL_9557316, EPI_ISL_9604242, EPI_ISL_9605406, EPI_ISL_9605660, EPI_ISL_9605718, EPI_ISL_9605921, EPI_ISL_9606486, EPI_ISL_9606537, EPI_ISL_9606640                                                                                                                                                                                                                                                                                                                                                                                                                                                                                                                                                                                                                                                                                                                                                                             | see above                                                                   | Northumbria University / South Tees Hospitals NHS Foundation Trust / North Cumbria Integrated Care NHS Foundation Trust / North Tees and Hartlepool NHS Foundation Trust / Newcastle Hospitals NHS Foundation Trust                                                                                                                                                                                                                                                                                                                               | COVID-19 Genomics UK (COG-UK) Consortium<br>Andrew Nelson; Brendan Payne; Clive Graham; Darren L Smith; Debra Padgett; Edward Barton; Emma Swindells; Garren Scott; Gary Black; Gary Eltringham; Giles S Holt; Greg R Young; Jane Greenaway; Jennifer Collins; John Allan; Joshua Loh; Lynn Dover; Matthew Bashton; Mohammad A Tariq; Paul Baker; Sarah Essex; Steve Liggett; Wen C Yew; Yusrī Taha                                                                                                                                                                                                                                                                                                    |
| EPI_ISL_9303247                                                                                                                                                                                                                                                                                                                                                                                                                                                                                                                                                                                                                                                                                                                                                                                                                                                                                                                                                                                                                                            | Northwestern Memorial Hospital                                              | Northwestern University - Center for Pathogen Genomics and Microbial Evolution                                                                                                                                                                                                                                                                                                                                                                                                                                                                    | Chad J. Achenbach; Chao Qi; Egon A. Ozer; Judd F. Hultquist; Lacy M. Simons; Lawrence J. Jennings; Michael G. Ison; Ramon Lorenzo-Redondo; Taylor J. Dean                                                                                                                                                                                                                                                                                                                                                                                                                                                                                                                                              |
| EPI_ISL_9744325                                                                                                                                                                                                                                                                                                                                                                                                                                                                                                                                                                                                                                                                                                                                                                                                                                                                                                                                                                                                                                            | OTHERS - CAGAYAN VALLEY CENTER FOR HEALTH DEVELOPMENT                       | Research Institute for Tropical Medicine                                                                                                                                                                                                                                                                                                                                                                                                                                                                                                          | Alexander Sadiasa; Amalea Dulcene D. Nicolasora; Anne Pauline A. Alpino; Ardiane Ysabelle M. Dolor; Catalino S. Demetria; Criselda T. Bautista; Francisco Gerardo M. Polotan; Gerald Ivan Sotelo; Jefferson Earl J. Halog; Joseph Hughes; Joy Mariette L. Parayray; Kirstyn Brunker; Lei Lanna M. Dancel; Ma. Angelica A. Tujan; Mayan Uy-Lumandas; Othoniel Jan T. Onza; Simon Dalry; Timothy John R. Dizon; Vina Lea F. Arguelles; Yao-Tsun Li                                                                                                                                                                                                                                                       |
| EPI_ISL_9744324                                                                                                                                                                                                                                                                                                                                                                                                                                                                                                                                                                                                                                                                                                                                                                                                                                                                                                                                                                                                                                            | OTHERS - CAGAYAN VALLEY FOR HEALTH DEVELOPMENT                              | Research Institute for Tropical Medicine                                                                                                                                                                                                                                                                                                                                                                                                                                                                                                          | Alexander Sadiasa; Amalea Dulcene D. Nicolasora; Anne Pauline A. Alpino; Ardiane Ysabelle M. Dolor; Catalino S. Demetria; Criselda T. Bautista; Francisco Gerardo M. Polotan; Gerald Ivan Sotelo; Jefferson Earl J. Halog; Joseph Hughes; Joy Mariette L. Parayray; Kirstyn Brunker; Lei Lanna M. Dancel; Ma. Angelica A. Tujan; Mayan Uy-Lumandas; Othoniel Jan T. Onza; Simon Dalry; Timothy John R. Dizon; Vina Lea F. Arguelles; Yao-Tsun Li                                                                                                                                                                                                                                                       |
| EPI_ISL_9744335,<br>EPI_ISL_9744336                                                                                                                                                                                                                                                                                                                                                                                                                                                                                                                                                                                                                                                                                                                                                                                                                                                                                                                                                                                                                        | OTHERS - DOH - REGION XI                                                    | Research Institute for Tropical Medicine                                                                                                                                                                                                                                                                                                                                                                                                                                                                                                          | Alexander Sadiasa; Amalea Dulcene D. Nicolasora; Anne Pauline A. Alpino; Ardiane Ysabelle M. Dolor; Catalino S. Demetria; Criselda T. Bautista; Francisco Gerardo M. Polotan; Gerald Ivan Sotelo; Jefferson Earl J. Halog; Joseph Hughes; Joy Mariette L. Parayray; Kirstyn Brunker; Lei Lanna M. Dancel; Ma. Angelica A. Tujan; Mayan Uy-Lumandas; Othoniel Jan T. Onza; Simon Dalry; Timothy John R. Dizon; Vina Lea F. Arguelles; Yao-Tsun Li                                                                                                                                                                                                                                                       |
| EPI_ISL_9321878                                                                                                                                                                                                                                                                                                                                                                                                                                                                                                                                                                                                                                                                                                                                                                                                                                                                                                                                                                                                                                            | Oblastni nemocnice Trutnov a.s.                                             | University Hospital Hradec Kralove                                                                                                                                                                                                                                                                                                                                                                                                                                                                                                                | Helena Kovarikova; Lenka Rysava; Marketa Gancarcikova; Monika Berankova                                                                                                                                                                                                                                                                                                                                                                                                                                                                                                                                                                                                                                |
| EPI_ISL_9172532,<br>EPI_ISL_9693108,<br>EPI_ISL_9693109,<br>EPI_ISL_9693111                                                                                                                                                                                                                                                                                                                                                                                                                                                                                                                                                                                                                                                                                                                                                                                                                                                                                                                                                                                | Orebro University Hospital, Dept Laboratory Medicine, Clinical Microbiology | Orebro University Hospital                                                                                                                                                                                                                                                                                                                                                                                                                                                                                                                        | Sundqvist M et al                                                                                                                                                                                                                                                                                                                                                                                                                                                                                                                                                                                                                                                                                      |
| EPI_ISL_9496451, EPI_ISL_9498105, EPI_ISL_9503197, EPI_ISL_9565140, EPI_ISL_9565672, EPI_ISL_9567306, EPI_ISL_9567903, EPI_ISL_9589979, EPI_ISL_9591025, EPI_ISL_9591095, EPI_ISL_9591148, EPI_ISL_9591177, EPI_ISL_9591618, EPI_ISL_9591656, EPI_ISL_9591919, EPI_ISL_9591937, EPI_ISL_9691911, EPI_ISL_9694106, EPI_ISL_9695733, EPI_ISL_9786535, EPI_ISL_9786687, EPI_ISL_9787920, EPI_ISL_9788162, EPI_ISL_9788258, EPI_ISL_9815261, EPI_ISL_9815277, EPI_ISL_9815279, EPI_ISL_9815347, EPI_ISL_9815355, EPI_ISL_9815476, EPI_ISL_9815478, EPI_ISL_9815514, EPI_ISL_9815535, EPI_ISL_9815538, EPI_ISL_9816028, EPI_ISL_9816090, EPI_ISL_9816211                                                                                                                                                                                                                                                                                                                                                                                                        | see above                                                                   | Originating lab: Wales Specialist Virology Centre Sequencing lab: Pathogen Genomics Unit<br>Public Health Wales Microbiology Cardiff Wales Specialist Virology Centre<br>Alec Birchley; Alexander Adams; Amy Gaskin; Angela Marchbank; Bree Gatica-Wilcox; Catherine Moore; Jason Coombes; Joanne Watkins; Joel Southgate; Johnathan Evans; Laura Gifford; Lauren Gilbert; Lee Graham; Malorie Perry; Matthew Bull; Nicole Pacchiarini; Sally Corden; Sara Kumziene-Summerhayes; Sara Rey; Sarah Taylor; Simon Cottrell; Sophie Jones; Tom Connor |                                                                                                                                                                                                                                                                                                                                                                                                                                                                                                                                                                                                                                                                                                        |
| EPI_ISL_9227194, EPI_ISL_9227209, EPI_ISL_9227210, EPI_ISL_9227211, EPI_ISL_9681623, EPI_ISL_9747969, EPI_ISL_9747970, EPI_ISL_9747971, EPI_ISL_9747972, EPI_ISL_9747973, EPI_ISL_9747974, EPI_ISL_9747975, EPI_ISL_9747976, EPI_ISL_9747977, EPI_ISL_9747978, EPI_ISL_9747979, EPI_ISL_9747992, EPI_ISL_9747993, EPI_ISL_9747994, EPI_ISL_9747995, EPI_ISL_9747996, EPI_ISL_9747997, EPI_ISL_9747998, EPI_ISL_9748160                                                                                                                                                                                                                                                                                                                                                                                                                                                                                                                                                                                                                                     | see above                                                                   | Oslo University Hospital, Department of Microbiology                                                                                                                                                                                                                                                                                                                                                                                                                                                                                              | Norwegian Institute of Public Health, Department of Virology<br>Arvind Yegambaram Meenakshi Sundaram; Cathrine Fladeby; Garcia Llorente Ignacio; Gregor D. Giffilan; Hilde Elshaug; Hilde Vollan; Jon Bråte; Kamilla Heddeland Instefjord; Karoline Bragstad; Kathrine Stene-Johansen; Line Victoria Moen; Lise Andresen; Mariann Nilsen; Mona Holberg-Petersen; Olav Hungnes; Pedersen Benedikte Neujen; Pål Marius Bjørnstad; Rasmus Riis Kopperud; Teodora Plamenova Ribarska                                                                                                                                                                                                                       |
| EPI_ISL_9048077,<br>EPI_ISL_9048078,<br>EPI_ISL_9048079                                                                                                                                                                                                                                                                                                                                                                                                                                                                                                                                                                                                                                                                                                                                                                                                                                                                                                                                                                                                    | PPHC-Purdue University                                                      | Animal Disease Diagnostic Laboratory, Purdue University College of Veterinary Medicine                                                                                                                                                                                                                                                                                                                                                                                                                                                            | Jobin Kattoor; Rebecca P Wilkes                                                                                                                                                                                                                                                                                                                                                                                                                                                                                                                                                                                                                                                                        |
| EPI_ISL_9388283                                                                                                                                                                                                                                                                                                                                                                                                                                                                                                                                                                                                                                                                                                                                                                                                                                                                                                                                                                                                                                            | PPHL Lumbini                                                                | National Public Health Laboratory                                                                                                                                                                                                                                                                                                                                                                                                                                                                                                                 | National Public Health Laboratory Team                                                                                                                                                                                                                                                                                                                                                                                                                                                                                                                                                                                                                                                                 |
| EPI_ISL_9350019,<br>EPI_ISL_9659394,<br>EPI_ISL_9661362,<br>EPI_ISL_9661482,<br>EPI_ISL_9661494                                                                                                                                                                                                                                                                                                                                                                                                                                                                                                                                                                                                                                                                                                                                                                                                                                                                                                                                                            | Pandemic Response Lab - NYC                                                 | Pandemic Response Lab, R&D                                                                                                                                                                                                                                                                                                                                                                                                                                                                                                                        | Alex Carpio; Cybill del Castillo; Haiping Hao; Isabel Fernandez Escapa; Jon Laurent; Melissa Hopkins; Michael Hammerling; Simran Chhabria; Simran Gupta; Sol Rey; Steven Chase; Tiara Rivera; William Ward                                                                                                                                                                                                                                                                                                                                                                                                                                                                                             |
| EPI_ISL_9696313,<br>EPI_ISL_9696314,<br>EPI_ISL_9696315,<br>EPI_ISL_9696317                                                                                                                                                                                                                                                                                                                                                                                                                                                                                                                                                                                                                                                                                                                                                                                                                                                                                                                                                                                | Pandit Dindayal Upadhyay Medical College, Rajkot                            | Gujarat Biotechnology Research Centre                                                                                                                                                                                                                                                                                                                                                                                                                                                                                                             | Akhilesh Modi; Apurvasinh Puvar; Bhadreshsinh Gohil; Chaitanya Joshi; Disha Vora; Janvi Raval; Jaykumar Rangani; Kavathiya; Madhvi Joshi; Nimesh Patel; Nitin Savaliya; NitinShukla; Priyank Chavda; Ramesh Pandit; Roshani Mishra; Sonal Sharma; Tasnim Trivedi; Zarna Patel                                                                                                                                                                                                                                                                                                                                                                                                                          |
| EPI_ISL_9023190,<br>EPI_ISL_9696310                                                                                                                                                                                                                                                                                                                                                                                                                                                                                                                                                                                                                                                                                                                                                                                                                                                                                                                                                                                                                        | Pangenomics International Pvt. Ltd, Ahmedabad                               | Gujarat Biotechnology Research Centre                                                                                                                                                                                                                                                                                                                                                                                                                                                                                                             | Akhilesh Modi; Apurvasinh Puvar; Bhadreshsinh Gohil; Chaitanya Joshi; Disha Vora; Janvi Raval; Jaykumar Rangani; Jwalant Shah; Madhvi Joshi; Nimesh Patel; Nitin Savaliya; NitinShukla; Priyank Chavda; Ramesh Pandit; Roshani Mishra; Shashi Singh; Sonal Sharma; Tasnim Trivedi; Zarna Patel                                                                                                                                                                                                                                                                                                                                                                                                         |
| EPI_ISL_9416794,<br>EPI_ISL_9416795,<br>EPI_ISL_9416797                                                                                                                                                                                                                                                                                                                                                                                                                                                                                                                                                                                                                                                                                                                                                                                                                                                                                                                                                                                                    | Pasteur Institute in Ho Chi Minh city                                       | Department of Microbiology and Immunology                                                                                                                                                                                                                                                                                                                                                                                                                                                                                                         | Dai Vo Thi Trang; Dao Hoang Thi Nhu; Giang Thanh Dang; Hang Pham Thi Thu; Loan Kim Hoang; Manh Huy Dao; Nhung Vu Pham Hong; Quang Chan Luong; Quang Duy Pham; Thang Minh Cao; Thao Nguyen Thi Ngoc; Think Viet Nguyen; Thuong Vu Nguyen; Uyen Phan Thi Ngoc                                                                                                                                                                                                                                                                                                                                                                                                                                            |
| EPI_ISL_9413820,<br>EPI_ISL_9413823,<br>EPI_ISL_9413824,<br>EPI_ISL_9413826,<br>EPI_ISL_9413835,<br>EPI_ISL_9413840                                                                                                                                                                                                                                                                                                                                                                                                                                                                                                                                                                                                                                                                                                                                                                                                                                                                                                                                        | PathCare, Cape Town                                                         | Division of Medical Virology, National Health Laboratory Service (NHLS), Tygerberg Hospital / Stellenbosch University                                                                                                                                                                                                                                                                                                                                                                                                                             | Gert van Zyl; Jean Maritz; Nadine Cronje; Petra Raimond; Shannon Wilson; Tania Stander; Tongai Maponga; Wolfgang Preiser                                                                                                                                                                                                                                                                                                                                                                                                                                                                                                                                                                               |
| EPI_ISL_9210700,<br>EPI_ISL_9434098,<br>EPI_ISL_9434146,<br>EPI_ISL_9434224                                                                                                                                                                                                                                                                                                                                                                                                                                                                                                                                                                                                                                                                                                                                                                                                                                                                                                                                                                                | PathLab Bay of Plenty                                                       | Institute of Environmental Science and Research (ESR)                                                                                                                                                                                                                                                                                                                                                                                                                                                                                             | Anja Werno; Antje van der Linden; Arlo Upton; Chris Mansell; Clare Gebbie; David Hammer; Dhanisha Patel; Dragana Drinkovic; Erasmus Smit; Gary McAuliffe; Hana Sofia Andersson; Hermes Perez; James Ussher; Jill Sherwood; Jing Wang; Joep de Lig; Josh Freeman; Julia Howard; Juliet Elvy; Lauren Jelly; Mary DeAlmeida; Matt Blakiston; Matt Storey; Matthew Rogers; Max Bloomfield; Michael Addie; Michelle Balm; Muhammad Faisal; Nikki Freed; Olin Silander; Olivia Stroeven; Rachel Boyle; Sally Roberts; SallyAnn Harbison; Sarah Cockerton; Sarah Jefferies; Sharmini Muttaiyah; Susan Morpeth; Susan Taylor; Timothy Blackmore; Vani Sathyendran; Veronica Playle; Virginia Hope; Xiaoyun Ren |
| EPI_ISL_8937390,<br>EPI_ISL_8937401                                                                                                                                                                                                                                                                                                                                                                                                                                                                                                                                                                                                                                                                                                                                                                                                                                                                                                                                                                                                                        | PathWest Laboratory Medicine WA                                             | PathWest Laboratory Medicine WA Microbial Surveillance Unit                                                                                                                                                                                                                                                                                                                                                                                                                                                                                       | PathWest Laboratory Medicine WA Microbial Surveillance Unit                                                                                                                                                                                                                                                                                                                                                                                                                                                                                                                                                                                                                                            |
| EPI_ISL_9610230                                                                                                                                                                                                                                                                                                                                                                                                                                                                                                                                                                                                                                                                                                                                                                                                                                                                                                                                                                                                                                            | Pathocare Pathology Laboratory, Vadodara                                    | Gujarat Biotechnology Research Centre                                                                                                                                                                                                                                                                                                                                                                                                                                                                                                             | Akhilesh Modi; Apurvasinh Puvar; Bhadreshsinh Gohil; Chaitanya Joshi; Disha Vora; Janvi Raval; Jaykumar Rangani; Madhvi Joshi; Nimesh Patel; Nitin Savaliya; NitinShukla; Priyank Chavda; Ramesh Pandit; Roshani Mishra; Sonal Sharma; Tasnim Trivedi; Viral Patel; Zarna Patel                                                                                                                                                                                                                                                                                                                                                                                                                        |
| EPI_ISL_9363077                                                                                                                                                                                                                                                                                                                                                                                                                                                                                                                                                                                                                                                                                                                                                                                                                                                                                                                                                                                                                                            | Pathology West - NSW Health Pathology                                       | NSW Health Pathology - Institute of Clinical Pathology and Medical Research; Westmead Hospital; University of Sydney                                                                                                                                                                                                                                                                                                                                                                                                                              | Arnott A.; Draper J.; Gall M.; Martinez E.; Rockett R.; Sintchenko V.; on behalf of ICPMR                                                                                                                                                                                                                                                                                                                                                                                                                                                                                                                                                                                                              |
| EPI_ISL_9611342                                                                                                                                                                                                                                                                                                                                                                                                                                                                                                                                                                                                                                                                                                                                                                                                                                                                                                                                                                                                                                            | Piyavate Hospital                                                           | National Institute of Health, Department of Medical Sciences, Ministry of Public Health, Thailand                                                                                                                                                                                                                                                                                                                                                                                                                                                 | Archawin Rojanawitwat; Natchaya Khadsang; Nuttida Thongpramol; Pakorn Promtong; Pilailuk Okada; Sirikanda Wimol; Siriraporn Phuygun; Sunthareeya Waicharoen; Suratchana Mitrat; Thanutsapa Thanadachakul                                                                                                                                                                                                                                                                                                                                                                                                                                                                                               |
| EPI_ISL_9431272, EPI_ISL_9479766, EPI_ISL_9479767, EPI_ISL_9479768, EPI_ISL_9479769, EPI_ISL_9479770, EPI_ISL_9479771, EPI_ISL_9479773, EPI_ISL_9479774, EPI_ISL_9479775, EPI_ISL_9479777, EPI_ISL_9479779                                                                                                                                                                                                                                                                                                                                                                                                                                                                                                                                                                                                                                                                                                                                                                                                                                                 | see above                                                                   | Platform BIS UZA/Uantwerpen                                                                                                                                                                                                                                                                                                                                                                                                                                                                                                                       | Basil Britto Xavier; Christine Lammens; Herman Goossens; Ines Verbesselt; Jasmine Coppens; Kathleen Holemans; Marie Le Mercier; Veerle Matheussen                                                                                                                                                                                                                                                                                                                                                                                                                                                                                                                                                      |
| EPI_ISL_9325657                                                                                                                                                                                                                                                                                                                                                                                                                                                                                                                                                                                                                                                                                                                                                                                                                                                                                                                                                                                                                                            | Poliklinika AGEL, Plzen                                                     | Department of Microbiology, University Hospital in                                                                                                                                                                                                                                                                                                                                                                                                                                                                                                | Jaroslav Hrabak; Katerina Chudejova; Katerina Vlkova; Petra Kocova; Vendula Heringova                                                                                                                                                                                                                                                                                                                                                                                                                                                                                                                                                                                                                  |

| Pilsen                                                                                                                                                                                                                                                                                                                                                                                                                                                                                                                                        |                                                                                                            |                                                                                                                                                                                                                     |                                                                                                                                                                                                                                                                                                                                                                                                                                                                                                             |
|-----------------------------------------------------------------------------------------------------------------------------------------------------------------------------------------------------------------------------------------------------------------------------------------------------------------------------------------------------------------------------------------------------------------------------------------------------------------------------------------------------------------------------------------------|------------------------------------------------------------------------------------------------------------|---------------------------------------------------------------------------------------------------------------------------------------------------------------------------------------------------------------------|-------------------------------------------------------------------------------------------------------------------------------------------------------------------------------------------------------------------------------------------------------------------------------------------------------------------------------------------------------------------------------------------------------------------------------------------------------------------------------------------------------------|
| EPI_ISL_9509414, EPI_ISL_9509673                                                                                                                                                                                                                                                                                                                                                                                                                                                                                                              | Polski Bank Komórek Macierzystych S.A. - Diagnostyka Sp. z o. o.                                           | 1. Academic Center for Pathomorphological and Genetic-Molecular Diagnostics Ltd, Białystok, Poland<br>2. National Institute of Public Health - National Institute of Hygiene, Warsaw, Poland                        | Anetta Sulewska; Jacek Nikliński; Janusz Dzięciół; Joanna Kiśluk; Katarzyna Zacharczuk; Konrad Raczkowski; Magdalena Nowakowska; Małgorzata Sadkowska-Todys; Piotr Karabowicz; Piotr Majewski; Przemysław Bieчек. Joanna Reszeć; Radosław Charkiewicz; Tomasz Wolkowicz                                                                                                                                                                                                                                     |
| EPI_ISL_9233840                                                                                                                                                                                                                                                                                                                                                                                                                                                                                                                               | Praxisgemeinschaft für Laboratoriumsmedizin Labor Blumenstraße; Praxis Dr. E. Wietschel & Dr. F. Wietschel | Robert Koch Institute                                                                                                                                                                                               |                                                                                                                                                                                                                                                                                                                                                                                                                                                                                                             |
| EPI_ISL_9682334                                                                                                                                                                                                                                                                                                                                                                                                                                                                                                                               | Public Health Authority of the Slovak Republic                                                             | Biomedical Centre Martin, Jessenius Faculty of Medicine in Martin, Comenius University                                                                                                                              | Dusan Loderer; Ivana Kusubova; Katarina Janikova; Maria Skerenova; Marian Grendar                                                                                                                                                                                                                                                                                                                                                                                                                           |
| EPI_ISL_9130644, EPI_ISL_9130645                                                                                                                                                                                                                                                                                                                                                                                                                                                                                                              | Public Health Authority of the Slovak Republic                                                             | Public Health Authority of the Slovak Republic                                                                                                                                                                      | Anna Gičová; Barbora Kotvasová; Elena Tichá; Lucia Ševčíková; Miroslav Böhrner; Pavol Mišenko; Terézia Vrabľová; Tomáš Szemes                                                                                                                                                                                                                                                                                                                                                                               |
| EPI_ISL_9341163, EPI_ISL_9341664, EPI_ISL_9342003, EPI_ISL_9342094, EPI_ISL_9342104, EPI_ISL_9342200, EPI_ISL_9684252, EPI_ISL_9684253, EPI_ISL_9684389, EPI_ISL_9684518, EPI_ISL_9684519, EPI_ISL_9684520, EPI_ISL_9684524, EPI_ISL_9684530, EPI_ISL_9684532, EPI_ISL_9684534, EPI_ISL_9684536, EPI_ISL_9684562, EPI_ISL_9684677                                                                                                                                                                                                             | see above                                                                                                  | Public Health Ontario Laboratory                                                                                                                                                                                    | Aimin Li; Alireza Eshaghi; Andre Villegas; Ashleigh Sullivan; Christine Frantz; Dean Maxwell; Esha Joshi; Jared Simpson; Jennifer L Guthrie; Jonathan B Gubbay; Kartikeyan Sivaraman; Lawrence Heiser; Matthew Watson; Michael CY Li; Michael Laszloffy; Nahuel Fittipaldi; Philip Banh; Richard de Borja; Samir N Patel; Sandeep Nagra; Sandra Zittermann; Sarah Teatero; Vanessa G Allen; Yao Chen; Yogi Sundaravadanam                                                                                   |
| EPI_ISL_9587011, EPI_ISL_9587032, EPI_ISL_9587128, EPI_ISL_9602492, EPI_ISL_9602707                                                                                                                                                                                                                                                                                                                                                                                                                                                           | Quadram Institute Bioscience                                                                               | COVID-19 Genomics UK (COG-UK) Consortium                                                                                                                                                                            | Alexander J Trotter; Ana Martínez Gascuña; Andrew J. Page; Darcie Burgess; Dave J. Baker; Leonardo de Oliveira Martins; Lizzie Meadows; Martin Lott; Michaela Matthews; Nabil-Fareed Alikhan; Rebecca Sutcliffe; Rhiannon Evans; Thanh Le-Viet                                                                                                                                                                                                                                                              |
| EPI_ISL_8880057, EPI_ISL_8880058, EPI_ISL_8880059, EPI_ISL_8880060, EPI_ISL_8880061, EPI_ISL_8880062, EPI_ISL_8880063                                                                                                                                                                                                                                                                                                                                                                                                                         | see above                                                                                                  | Quarantine Camp                                                                                                                                                                                                     | Hong Kong Department of Health                                                                                                                                                                                                                                                                                                                                                                                                                                                                              |
| EPI_ISL_9624884, EPI_ISL_9624937, EPI_ISL_9624963, EPI_ISL_9625539, EPI_ISL_9628857                                                                                                                                                                                                                                                                                                                                                                                                                                                           | Quest Diagnostics Incorporated                                                                             | Centers for Disease Control and Prevention Division of Viral Diseases, Pathogen Discovery                                                                                                                           | A. Gerasimova; A. Perez; B. Anderson; Benjamin Rambo-Martin; Christopher Gulvick; Clinton Paden; Dakota Howard; Dhvani Batra; Duncan MacCannell; Erisa Sula; F. Lacbawan; I. Shlyakhter; Jason Caravas; K. Livingston; Kristine Lacey; L. Bernstein; M. Hua; Matthew Schmeirer; P. Tanpaiboon; Peter Cook; K. Kagari; R. Owen; R. Rolando; S. Rosenthal; Scott Sammons; Shantavia Morrison; Tymeckia Kendali; Victoria Caban Figueroa; Y. Liu; Yvette Unarumhi                                              |
| EPI_ISL_9744295, EPI_ISL_9744296, EPI_ISL_9744297, EPI_ISL_9744298, EPI_ISL_9744299, EPI_ISL_9744301, EPI_ISL_9744302, EPI_ISL_9744303, EPI_ISL_9744306, EPI_ISL_9744308, EPI_ISL_9744309, EPI_ISL_9744310, EPI_ISL_9744311, EPI_ISL_9744313, EPI_ISL_9744314, EPI_ISL_9744315                                                                                                                                                                                                                                                                | see above                                                                                                  | RG CORAZON LOCSIN MONTELIBANO MEMORIAL REGIONAL                                                                                                                                                                     | Research Institute for Tropical Medicine                                                                                                                                                                                                                                                                                                                                                                                                                                                                    |
| EPI_ISL_9803028                                                                                                                                                                                                                                                                                                                                                                                                                                                                                                                               | RIDGEVIEW MEDICAL CENTER                                                                                   | Minnesota Department of Health, Public Health Laboratory                                                                                                                                                            | Alyssa Mondell; Elizabeth Horn; Haejin Hwang; Jacob Garfin; Kelly Pung; Matt Plumb; Sarah Namugenyi; and Xiong Wang                                                                                                                                                                                                                                                                                                                                                                                         |
| EPI_ISL_9622151                                                                                                                                                                                                                                                                                                                                                                                                                                                                                                                               | RS Jwa dr Soeharto Heerdjan                                                                                | National Institute of Health Research and Development                                                                                                                                                               | Arie Ardiansyah Nugraha; Fajar Nur Sulistyohadi; Hana Aparsi Pawestri; Hartanti Dian Ikawati; Kartika Dewi Puspa; Nelly Puspandari; Nur Ika Hariastuti; Puri Widia; Subangkit; Vivi Setiawaty                                                                                                                                                                                                                                                                                                               |
| EPI_ISL_9019316, EPI_ISL_9467876                                                                                                                                                                                                                                                                                                                                                                                                                                                                                                              | RS Murni Teguh Sudirman Jakarta<br>RS Pertamina Plaju Palembang                                            | Genomik Solidaritas Indonesia Laboratorium<br>National Institute of Health Research and Development                                                                                                                 | Aisyi Sakina Rifani; Anjar Puspita Sari; Annisa Muthiah Sukirman; Anuraj Shankar; Ariel Pradipta; Carissa Sintca Wijaya; Dian Tri Wahyudi; Esti Rahayuning Tias; Gracia Felias Enos Korompis; Louisa Markus; Meutia Ayuputeri Kumaheri; Stefanus Bernard<br>Arie Ardiansyah Nugraha; Fajar Nur Sulistyohadi; Hana Aparsi Pawestri; Hartanti Dian Ikawati; Kartika Dewi Puspa; Nelly Puspandari; Nur Ika Hariastuti; Puri Widia; Subangkit; Vivi Setiawaty                                                   |
| EPI_ISL_9751303                                                                                                                                                                                                                                                                                                                                                                                                                                                                                                                               | RS TK IV Kencana Serang                                                                                    | National Institute of Health Research and Development                                                                                                                                                               | Arie Ardiansyah Nugraha; Fajar Nur Sulistyohadi; Hana Aparsi Pawestri; Hartanti Dian Ikawati; Kartika Dewi Puspa; Nelly Puspandari; Nur Ika Hariastuti; Putri Widia; Subangkit; Vivi Setiawaty                                                                                                                                                                                                                                                                                                              |
| EPI_ISL_9504185, EPI_ISL_9504186                                                                                                                                                                                                                                                                                                                                                                                                                                                                                                              | RS YARSI                                                                                                   | Genomik Solidaritas Indonesia Laboratorium                                                                                                                                                                          | Annisa Muthiah Sukirman; Anuraj Shankar; Ariel Pradipta; Carissa Sintca Wijaya; Dhahlia Agustina Cahyono; Gracia Felias Enos Korompis; Louisa Markus; Meutia Ayuputeri Kumaheri; Stefanus Bernard                                                                                                                                                                                                                                                                                                           |
| EPI_ISL_9733086, EPI_ISL_9274709, EPI_ISL_9467700                                                                                                                                                                                                                                                                                                                                                                                                                                                                                             | RSUD Sidoarjo<br>RSUP Fatmawati<br>Ramathibodi Hospital                                                    | Institute of Tropical Disease, Universitas Airlangga<br>Genomik Solidaritas Indonesia Laboratorium<br>COVID-19 Network Investigations (CONI) Alliance                                                               | Aldise M Nastro; Erwin Ashta Triyono; Gatot Soegiarto; Jezy R Dewantari; Joni Wahyuhadi; Kazufumi Shimizu; Krisnoadi Rahardjo; Laksmi Wulandari; Maria I Lusida; Resti Yudhawati; Rima R Prasetya; Soetjijpto; Yasuko Mori<br>Anna Christina Brazia; Annisa Muthiah Sukirman; Anuraj Shankar; Ariel Pradipta; Gracia Felias Enos Korompis; Louisa Markus; Meutia Ayuputeri Kumaheri; Stefanus Bernard; Vania Gavriila Wikasa                                                                                |
| EPI_ISL_9705768                                                                                                                                                                                                                                                                                                                                                                                                                                                                                                                               | Regionalny Szpital Specjalistyczny w Grudziądzu                                                            | 41. Tricity SARS-CoV-2 sequencing consortium: University of Gdansk, Medical University of Gdansk, Vaxican Ltd., Invicta Ltd. 2. National Institute of Public Health - National Institute of Hygiene, Warsaw, Poland | Celina Cybulska; Karolina Gackowska; Katarzyna Groth; Katarzyna Zacharczuk; Krystyna Bienkowska Szewczyk; Lukasz Rabalski; Maciej Gryzbek; Maciej Kosinski; Magdalena Nowakowska; Marcin Lubocki; Małgorzata Sadkowska-Todys; Tomasz Wolkowicz                                                                                                                                                                                                                                                              |
| EPI_ISL_9608500, EPI_ISL_9608501, EPI_ISL_9608502                                                                                                                                                                                                                                                                                                                                                                                                                                                                                             | Rejang Medical Centre (Sibu)                                                                               | Institute of Health and Community Medicine                                                                                                                                                                          | Chan Chia Jui; Chua Hock Hin; David Perera; Ooi Mong How; Tonnii Sia Loong Loong; Wong Jyn Shan                                                                                                                                                                                                                                                                                                                                                                                                             |
| EPI_ISL_9492507, EPI_ISL_9493842, EPI_ISL_9494035, EPI_ISL_9562684, EPI_ISL_9562715, EPI_ISL_9563894, EPI_ISL_9587339, EPI_ISL_9587627, EPI_ISL_9589515, EPI_ISL_9611111, EPI_ISL_9611116, EPI_ISL_9649631, EPI_ISL_9650178, EPI_ISL_9650222, EPI_ISL_9691447, EPI_ISL_9691548, EPI_ISL_9740715, EPI_ISL_9741075, EPI_ISL_9741281, EPI_ISL_9741387, EPI_ISL_9741922, EPI_ISL_9781364, EPI_ISL_9781441, EPI_ISL_9781443, EPI_ISL_9781452, EPI_ISL_9814428, EPI_ISL_9814569, EPI_ISL_9814572, EPI_ISL_9814617, EPI_ISL_9814633, EPI_ISL_9814818 | see above                                                                                                  | Respiratory Virus Unit, Microbiology Services Colindale, Public Health England                                                                                                                                      |                                                                                                                                                                                                                                                                                                                                                                                                                                                                                                             |
| EPI_ISL_9280285                                                                                                                                                                                                                                                                                                                                                                                                                                                                                                                               | Rhode Island Department of Health                                                                          | Infectious Disease Program, Broad Institute of Harvard and MIT                                                                                                                                                      | Adams, G.; Azevedo, K.; B.L.; B.W.; Bauer, M.; Birren; Carter, A.; Chaluvasi, S.; D.J.; DeRuff, K.; Gladden-Young, A.; Huard, R.; J.E.; K.J.; King, E.; Lagerborg, K.; Lemieux; Loreth, C.; Miller, A.; Normandin, E.; P.C.; Park; Pearlman, L.; Reilly, S.; Rudy, M.; Sabeti; Siddle; Tomkins-Tinch, C.; and MacInnis                                                                                                                                                                                      |
| EPI_ISL_9177634, EPI_ISL_9250475, EPI_ISL_9250561, EPI_ISL_9250577, EPI_ISL_9250688, EPI_ISL_9250743, EPI_ISL_9251590, EPI_ISL_9251628, EPI_ISL_9251645, EPI_ISL_9251667, EPI_ISL_9252780, EPI_ISL_9276263                                                                                                                                                                                                                                                                                                                                    | see above                                                                                                  | Rosalind Franklin Laboratory                                                                                                                                                                                        | Cordelia Langford; David K. Jackson; Dominic Kwiatkowski; Donald Fraser; Ewan Harrison; Ian Johnston; Jeffrey Barrett; John Sillitoe on behalf of the Wellcome Sanger Institute COVID-19 Surveillance Team; Rob Howes; Roberto Amato; Sonia Goncalves; Suki Lee; The Rosalind Franklin Laboratory and Alex Alderton                                                                                                                                                                                         |
| EPI_ISL_8887368, EPI_ISL_9019521, EPI_ISL_9019530                                                                                                                                                                                                                                                                                                                                                                                                                                                                                             | Rumah Sakit PELNI                                                                                          | Genomik Solidaritas Indonesia Laboratorium                                                                                                                                                                          | Aisyi Sakina Rifani; Annisa Muthiah Sukirman; Anuraj Shankar; Ariel Pradipta; Carissa Sintca Wijaya; Dian Tri Wahyudi; Esti Rahayuning Tias; Gracia Felias Enos Korompis; Himawan Masyhuri; Louisa Markus; Meutia Ayuputeri Kumaheri; Shery; Stefanus Bernard                                                                                                                                                                                                                                               |
| EPI_ISL_9298642, EPI_ISL_9017485, EPI_ISL_9298655                                                                                                                                                                                                                                                                                                                                                                                                                                                                                             | Rumah Sakit Pondok Indah<br>Rumah Sakit Royal Taruma                                                       | Genomik Solidaritas Indonesia Laboratorium<br>Genomik Solidaritas Indonesia Laboratorium                                                                                                                            | Amira Anwar; Annisa Muthiah Sukirman; Anuraj Shankar; Ariel Pradipta; Carissa Sintca Wijaya; Gracia Felias Enos Korompis; Louisa Markus; Maryoto; Meutia Ayuputeri Kumaheri; Reinhart Gabriel; Stefanus Bernard; Thyrsa Aisyi Sakina Rifani; Annisa Muthiah Sukirman; Anuraj Shankar; Ariel Pradipta; Carissa Sintca Wijaya; Dian Tri Wahyudi; Esti Rahayuning Tias; Gracia Felias Enos Korompis; Liman; Liman Harjono; Louisa Markus; Meutia Ayuputeri Kumaheri; Reinhart Gabriel; Riana; Stefanus Bernard |
| EPI_ISL_9222865, EPI_ISL_9222945, EPI_ISL_9222955, EPI_ISL_9222962, EPI_ISL_9222965, EPI_ISL_9222966, EPI_ISL_9222967, EPI_ISL_9222968, EPI_ISL_9222969, EPI_ISL_9222976, EPI_ISL_9222977, EPI_ISL_9222978, EPI_ISL_9222979, EPI_ISL_9222980, EPI_ISL_9222981, EPI_ISL_9222985                                                                                                                                                                                                                                                                | see above                                                                                                  | SA Pathology                                                                                                                                                                                                        | Caitlin Selway; Chuan Kok Lim; Ivan Bastian; Lex Leong; Mark Turra                                                                                                                                                                                                                                                                                                                                                                                                                                          |
| EPI_ISL_9431536                                                                                                                                                                                                                                                                                                                                                                                                                                                                                                                               | SALVE MEDICA Sp. z o.o.                                                                                    | 1. Academic Center for Pathomorphological and Genetic-Molecular Diagnostics Ltd, Białystok, Poland<br>2. National Institute of Public Health - National Institute of Hygiene, Warsaw, Poland                        | Anetta Sulewska; Jacek Nikliński; Janusz Dzięciół; Joanna Kiśluk; Katarzyna Zacharczuk; Konrad Raczkowski; Magdalena Nowakowska; Małgorzata Sadkowska-Todys; Piotr Karabowicz; Piotr Majewski; Przemysław Bieчек. Joanna Reszeć; Radosław Charkiewicz; Tomasz Wolkowicz                                                                                                                                                                                                                                     |
| EPI_ISL_9257949, EPI_ISL_9257973                                                                                                                                                                                                                                                                                                                                                                                                                                                                                                              | SC (UCO) Igiene e Sanità Pubblica, ASUGI, Trieste                                                          | SC (UCO) Igiene e Sanità Pubblica, ASUGI, Trieste                                                                                                                                                                   | Barbone F; Basaglia G; Busetti M; D'Agaro P; Dal Monego S; Degasperi M; Fontana F; Forciniti G; Koncan R; Licastro D; Pipan C; Piscianz E; Segat L                                                                                                                                                                                                                                                                                                                                                          |
| EPI_ISL_9713470, EPI_ISL_9713543                                                                                                                                                                                                                                                                                                                                                                                                                                                                                                              | SP ZOZ w Brzesku                                                                                           | 1. Academic Center for Pathomorphological and Genetic-Molecular Diagnostics Ltd, Białystok, Poland<br>2. National Institute of Public Health - National Institute of Hygiene, Warsaw, Poland                        | Anetta Sulewska; Jacek Nikliński; Janusz Dzięciół; Joanna Kiśluk; Katarzyna Zacharczuk; Konrad Raczkowski; Magdalena Nowakowska; Małgorzata Sadkowska-Todys; Piotr Karabowicz; Piotr Majewski; Przemysław Bieчек. Joanna Reszeć; Radosław Charkiewicz; Tomasz Wolkowicz                                                                                                                                                                                                                                     |
| EPI_ISL_9236258, EPI_ISL_9236274, EPI_ISL_9604287, EPI_ISL_9604290                                                                                                                                                                                                                                                                                                                                                                                                                                                                            | SSG Hospital Vadodara                                                                                      | Gujarat Biotechnology Research Centre                                                                                                                                                                               | Akhilesh Modi; Apurvasinh Puvvar; Bhadrashinh Gohil; Chaitanya Joshi; Disha Vora; Janvi Raval; Jaykumar Rangani; Jigna Karia; Madhvi Joshi; Nimesh Patel; Nitin Savaliya; NitinShukla; Priyank Chavda; Ramesh Pandit; Roshani Mishra; Sonal Sharma; Sumita Soni; Tasnim Trivedi; Zarna Patel                                                                                                                                                                                                                |
| EPI_ISL_9744330, EPI_ISL_9744332                                                                                                                                                                                                                                                                                                                                                                                                                                                                                                              | ST. JAMES HOSPITAL, INC.                                                                                   | Research Institute for Tropical Medicine                                                                                                                                                                            | Alexander Sadiasa; Amalea Dulcene D. Nicolasora; Anne Pauline A. Alpino; Ardiane Ysabelle M. Dolor; Catalino S. Demetria; Criselda T. Bautista; Francisco Gerardo M. Polotan; Gerald Ivan Sotelo; Jefferson Earl J. Halog; Joseph Hughes; Joy Mariette L. Pararay; Kirstyn Brunker; Lei Lanna M. Dancel; Ma. Angelica A. Tujan; Mayan Uy-Lumandas; Othoniel Jan T. Onza; Simon Daldry; Timothy John R. Dizon; Vina Lea F. Arguelles; Yao-Tsun Li                                                            |
| EPI_ISL_9322301, EPI_ISL_9322322                                                                                                                                                                                                                                                                                                                                                                                                                                                                                                              | SYNLAB AQUITAINE LABO MERLEN                                                                               | CNR Virus des Infections Respiratoires - France SUD                                                                                                                                                                 | Antonin Bal; Bruno Lina; Bruno Simon; Gregory Destras; Gwendolynne Burfin; Hadrien Regue; Laurence Josset; Martine Valette; Quentin Semanas; Théophile Boyer                                                                                                                                                                                                                                                                                                                                                |
| EPI_ISL_9463225                                                                                                                                                                                                                                                                                                                                                                                                                                                                                                                               | SYNLAB Jena Oncoscreen                                                                                     | Robert Koch Institute                                                                                                                                                                                               |                                                                                                                                                                                                                                                                                                                                                                                                                                                                                                             |
| EPI_ISL_9217584, EPI_ISL_9217869, EPI_ISL_9231270, EPI_ISL_9231867, EPI_ISL_9232624, EPI_ISL_9232896, EPI_ISL_9232982, EPI_ISL_9233002, EPI_ISL_9233596, EPI_ISL_9233707, EPI_ISL_9450218, EPI_ISL_9450312, EPI_ISL_9450345, EPI_ISL_9450402, EPI_ISL_9450408, EPI_ISL_9450834, EPI_ISL_9450857, EPI_ISL_9450980, EPI_ISL_9451072, EPI_ISL_9451398, EPI_ISL_9451570, EPI_ISL_9451688, EPI_ISL_9451973, EPI_ISL_9452020, EPI_ISL_9452071, EPI_ISL_9452112                                                                                      | see above                                                                                                  | SYNLAB MVZ Berlin                                                                                                                                                                                                   | Robert Koch Institute                                                                                                                                                                                                                                                                                                                                                                                                                                                                                       |





|                                                                                                                                                                                                                                                                                                                                                                                      |                                                                                                        |                                                                                                                                                                                                                                      |                                                                                                                                                                                                                                                                                                                                  |
|--------------------------------------------------------------------------------------------------------------------------------------------------------------------------------------------------------------------------------------------------------------------------------------------------------------------------------------------------------------------------------------|--------------------------------------------------------------------------------------------------------|--------------------------------------------------------------------------------------------------------------------------------------------------------------------------------------------------------------------------------------|----------------------------------------------------------------------------------------------------------------------------------------------------------------------------------------------------------------------------------------------------------------------------------------------------------------------------------|
| EPI_ISL_9509334,<br>EPI_ISL_9509724                                                                                                                                                                                                                                                                                                                                                  | Szpital Zakażny                                                                                        | Institute of Hygiene, Warsaw, Poland<br>1. Academic Center for Pathomorphological and Genetic-Molecular Diagnostics Ltd, Białystok, Poland<br>2. National Institute of Public Health - National Institute of Hygiene, Warsaw, Poland | Anetta Sulewska; Jacek Nikliński; Janusz Dzięcioł; Joanna Kiśluk; Katarzyna Zacharczuk; Konrad Raczkowski; Magdalena Nowakowska; Małgorzata Sadkowska-Todys; Piotr Karabowicz; Piotr Majewski; Przemysław Bieчек. Joanna Reszeć; Radosław Charkiewicz; Tomasz Wołkowicz                                                          |
| EPI_ISL_9572999                                                                                                                                                                                                                                                                                                                                                                      | TGen North                                                                                             | TGen North                                                                                                                                                                                                                           | "Jolene Bowers; Brett Van Tassel; Chris French; Darrin Lemmer; Dave Engelthaler"; Hayley Yaglom; Heather Centner                                                                                                                                                                                                                 |
| EPI_ISL_9242443                                                                                                                                                                                                                                                                                                                                                                      | The Jackson Laboratory                                                                                 | The Jackson Laboratory                                                                                                                                                                                                               | Adams M; Kelly K; Li L; Long E; Omerza G; Renzette N                                                                                                                                                                                                                                                                             |
| EPI_ISL_9034092,<br>EPI_ISL_9325360,<br>EPI_ISL_9325382,<br>EPI_ISL_9325387                                                                                                                                                                                                                                                                                                          | The Ohio State University Applied Microbiology Services Laboratory                                     | The Ohio State University Applied Microbiology Services Laboratory                                                                                                                                                                   | Seth A. Faith PhD                                                                                                                                                                                                                                                                                                                |
| EPI_ISL_9236172,<br>EPI_ISL_9236184,<br>EPI_ISL_9236196                                                                                                                                                                                                                                                                                                                              | Toprani Advance lab Systems, Vadodara                                                                  | Gujarat Biotechnology Research Centre                                                                                                                                                                                                | Akhilesh Modi; Apurvasinh Puvar; Bhadreshsinh Gohil; Chaitanya Joshi; Disha Vora; Janvi Raval; Jaykumar Rangani; Madhvi Joshi; Nimesh Patel; Nitin Savaliya; NitinShukla; Priyank Chavda; Ramesh Pandit; Roshani Mishra; Sonal Sharma; Tasnim Trivedi; Tuskar Toprani; Zarna Patel                                               |
| EPI_ISL_9152465                                                                                                                                                                                                                                                                                                                                                                      | U.O. Igiene, Ospedale Policlinico San Martino IRCCS Genova                                             | U.O. Igiene, Ospedale Policlinico San Martino Genova                                                                                                                                                                                 | Bruzzo Bianca; De Pace Vanessa; Domnich Alexander; Icardi Giancarlo on behalf of SARS-CoV-2 ITALIAN RESEARCH ENTERPRISE-(SCIRE) Collaborative Group; Orsi Andrea; Randazzo Nadia; Ricucci Valentina; Stefanelli Federica                                                                                                         |
| EPI_ISL_9258090,<br>EPI_ISL_9258091                                                                                                                                                                                                                                                                                                                                                  | U.O. Microbiologia Laboratorio Unico Centro Servizi - AUSL della Romagna                               | U.O. Microbiologia, Laboratorio Unico Centro Servizi - AUSL della Romagna                                                                                                                                                            | Giorgio Dirani                                                                                                                                                                                                                                                                                                                   |
| EPI_ISL_9313632,<br>EPI_ISL_9551429,<br>EPI_ISL_9551434,<br>EPI_ISL_9636968                                                                                                                                                                                                                                                                                                          | UC Davis Genome Center                                                                                 | UC Davis Genome Center                                                                                                                                                                                                               | Healthy Davis Together; UC Davis; UC Davis Genome Center                                                                                                                                                                                                                                                                         |
| EPI_ISL_9300773                                                                                                                                                                                                                                                                                                                                                                      | ULS Castelo Branco                                                                                     | Instituto Nacional de Saude (INSA)                                                                                                                                                                                                   | Borges et al                                                                                                                                                                                                                                                                                                                     |
| EPI_ISL_9433114                                                                                                                                                                                                                                                                                                                                                                      | UMC Groningen, Clinical Virology, Department of Medical Microbiology and Infection Prevention          | UMC Groningen, Clinical Virology, Department of Medical Microbiology and Infection Prevention                                                                                                                                        | Alexander Friedrich; Coretta Van Leer-Buter; Erley Lizarazo-Forero; Hubert Niesters; Lilli Gard; Marjolein Knoester; Monika Fliss; Sigrid Rosema; Xuewei Zhou                                                                                                                                                                    |
| EPI_ISL_9752882                                                                                                                                                                                                                                                                                                                                                                      | US Air Force School of Aerospace Medicine                                                              | US Air Force School of Aerospace Medicine                                                                                                                                                                                            | Anthony Fries; Carol Garrett; Clarise Starr; Deanna Muehleman; Elizabeth Macias; Jennifer Meyer; Kelsey Lanter; Sarah Purves; William Gruner                                                                                                                                                                                     |
| EPI_ISL_9481857                                                                                                                                                                                                                                                                                                                                                                      | USC Clinical Lab                                                                                       | Los Angeles County Public Health Laboratories                                                                                                                                                                                        | A.R. Gener et al.                                                                                                                                                                                                                                                                                                                |
| EPI_ISL_9229722                                                                                                                                                                                                                                                                                                                                                                      | Uniklinikum Carl Gustav Carus an der TU Dresden; Institut für Virologie                                | Robert Koch Institute                                                                                                                                                                                                                |                                                                                                                                                                                                                                                                                                                                  |
| EPI_ISL_9459411                                                                                                                                                                                                                                                                                                                                                                      | Uniklinikum Regensburg; Institut für klinische Mikrobiologie und Hygiene                               | Robert Koch Institute                                                                                                                                                                                                                |                                                                                                                                                                                                                                                                                                                                  |
| EPI_ISL_9610199,<br>EPI_ISL_9610248                                                                                                                                                                                                                                                                                                                                                  | Unipath Speciality Laboaratory, Ahmedabad                                                              | Gujarat Biotechnology Research Centre                                                                                                                                                                                                | Akhilesh Modi; Apurvasinh Puvar; Bhadreshsinh Gohil; Chaitanya Joshi; Disha Vora; Janvi Raval; Jaykumar Rangani; Jwalant Shah; Madhvi Joshi; Nimesh Patel; Nitin Savaliya; NitinShukla; Priyank Chavda; Ramesh Pandit; Roshani Mishra; Sonal Sharma; Tasnim Trivedi; Zarna Patel                                                 |
| EPI_ISL_9604291,<br>EPI_ISL_9610196,<br>EPI_ISL_9610219,<br>EPI_ISL_9610245,<br>EPI_ISL_9610246                                                                                                                                                                                                                                                                                      | Unipath Pathology Laboratory -Vadodara                                                                 | Gujarat Biotechnology Research Centre                                                                                                                                                                                                | Akhilesh Modi; Apurvasinh Puvar; Bhadreshsinh Gohil; Chaitanya Joshi; Disha Vora; Janvi Raval; Jaykumar Rangani; Madhvi Joshi; Nimesh Patel; Nitin Savaliya; NitinShukla; Priyank Chavda; Rakesh Shah; Ramesh Pandit; Roshani Mishra; Sonal Sharma; Tasnim Trivedi; Zarna Patel                                                  |
| EPI_ISL_9467341                                                                                                                                                                                                                                                                                                                                                                      | University Hospital Ostrava                                                                            | University Hospital Ostrava                                                                                                                                                                                                          | Chorzempa                                                                                                                                                                                                                                                                                                                        |
| EPI_ISL_9650121                                                                                                                                                                                                                                                                                                                                                                      | University Hospital of Northern Norway, Department for Microbiology and Infectious Disease Control     | Norwegian Institute of Public Health, Department of Virology                                                                                                                                                                         | Atiya R Ali; Debec Nadia; Engebretsen Serina Beate; Garcia Llorente Ignacio; Hilde Elishaug; Hilde Nordby Falkenhaug; Hilde Vollan; Jon Bråte; Kamilla Heddeland Instefjord; Karoline Bragstad; Kathrine Stene-Johansen; Line Victoria Moen; Marie Paulsen Madsen; Olav Hungnes; Pedersen Benedikte Nevjen; Rasmus Riis Kopperud |
| EPI_ISL_9193493,<br>EPI_ISL_9193715                                                                                                                                                                                                                                                                                                                                                  | University Hospitals of Geneva, Laboratory of Virology                                                 | HUG, Laboratory of Virology and the Health2030 Genome Center                                                                                                                                                                         | Aline Mamin; Ana Rita Goncalves; Cedric Howald; Deborah Penet; Francisco Perez; Henri Pegeot; Ioannis Xenarios; Keith Harshman; Laurent Kaiser; Lorenzo Cerutti; Melyssa Elies; Samuel Cordey                                                                                                                                    |
| EPI_ISL_9610958                                                                                                                                                                                                                                                                                                                                                                      | University of Liège COVID-19 testing center                                                            | GIGA Medical Genomics                                                                                                                                                                                                                | Claire Gourzonès; Cécile Meex; Keith Durkin; Laurent Gillet; Maria Artesi; Marie-Pierre Hayette; Nadine Cambisano; Nathalie Renotte; Olivier Ek; Sébastien Bontems; Vincent Bours                                                                                                                                                |
| EPI_ISL_9188012                                                                                                                                                                                                                                                                                                                                                                      | University of Mississippi Medical Center, Department of Pathology                                      | University of Mississippi Medical Center, Molecular and Genomics Core Facility                                                                                                                                                       | Ashley C. Johnson; D. Ashley Robinson; Ithiel J. Frame; Krishna K. Ayyalasoamayajula; Michael R. Garrett; Wenjie Wu                                                                                                                                                                                                              |
| EPI_ISL_9625189                                                                                                                                                                                                                                                                                                                                                                      | University of Wisconsin-Madison AIDS Vaccine Research Laboratories                                     | University of Wisconsin-Madison AIDS Vaccine Research Laboratories                                                                                                                                                                   | Gage Moreno; Katarina Braun; et al. AIDS Vaccine Research Laboratories                                                                                                                                                                                                                                                           |
| EPI_ISL_9325214                                                                                                                                                                                                                                                                                                                                                                      | Universität Zürich                                                                                     | Institute of Medical Virology, University of Zurich                                                                                                                                                                                  | Alexandra Trkola; Annette Audigé; Catharine Aquino; Cyril Shah; Daniel Ehrsam; Gabriela Ziltener; Guido Bloemberg; Hubert Rehrauer; Isabel Stürmer; Joel Wirz; Jon Huder; Jürg Böni; Kevin Steiner; Maria Grünberg; Maryam Zaheri; Michael Huber; Riccarda Capaul; Stefan Schmutz; Verena Kufner; Weihong Qi                     |
| EPI_ISL_9325228                                                                                                                                                                                                                                                                                                                                                                      | Universitäts-Kinderspital Zürich                                                                       | Institute of Medical Virology, University of Zurich                                                                                                                                                                                  | Alexandra Trkola; Annette Audigé; Catharine Aquino; Cyril Shah; Daniel Ehrsam; Gabriela Ziltener; Guido Bloemberg; Hubert Rehrauer; Isabel Stürmer; Joel Wirz; Jon Huder; Jürg Böni; Kevin Steiner; Maria Grünberg; Maryam Zaheri; Michael Huber; Riccarda Capaul; Stefan Schmutz; Verena Kufner; Weihong Qi                     |
| EPI_ISL_9324974                                                                                                                                                                                                                                                                                                                                                                      | UniversitätsSpital Zürich                                                                              | Institute of Medical Virology, University of Zurich                                                                                                                                                                                  | Alexandra Trkola; Annette Audigé; Catharine Aquino; Cyril Shah; Daniel Ehrsam; Gabriela Ziltener; Guido Bloemberg; Hubert Rehrauer; Isabel Stürmer; Joel Wirz; Jon Huder; Jürg Böni; Kevin Steiner; Maria Grünberg; Maryam Zaheri; Michael Huber; Riccarda Capaul; Stefan Schmutz; Verena Kufner; Weihong Qi                     |
| EPI_ISL_9461506,<br>EPI_ISL_9461850                                                                                                                                                                                                                                                                                                                                                  | Universitätsklinikum Hamburg-Eppendorf / Institut für Medizinische Mikrobiologie Virologie und Hygiene | Robert Koch Institute                                                                                                                                                                                                                |                                                                                                                                                                                                                                                                                                                                  |
| EPI_ISL_9719540                                                                                                                                                                                                                                                                                                                                                                      | Universitätsklinikum Ulm - Institut für Virologie                                                      | Robert Koch Institute                                                                                                                                                                                                                |                                                                                                                                                                                                                                                                                                                                  |
| EPI_ISL_9376208,<br>EPI_ISL_9376223                                                                                                                                                                                                                                                                                                                                                  | Uniwersyteckie Centrum Kliniczne                                                                       | 1. Tricity SARS-CoV-2 sequencing consortium: University of Gdansk, Medical University of Gdansk, Vaxican Ltd., Invicta Ltd. 2. National Institute of Public Health - National Institute of Hygiene, Warsaw, Poland                   | Celina Cybulska; Karolina Gackowska; Katarzyna Groth; Katarzyna Zacharczuk; Krystyna Bienkowska Szewczyk; Lukasz Rabalski; Maciej Grzybek; Maciej Kosinski; Magdalena Nowakowska; Marcin Lubocki; Małgorzata Sadkowska-Todys; Tomasz Wołkowicz                                                                                   |
| EPI_ISL_9150339                                                                                                                                                                                                                                                                                                                                                                      | Utah Public Health Laboratory                                                                          | Utah Public Health Laboratory                                                                                                                                                                                                        | Erin L. Young; John Arnn; Kelly F. Oakeson; Olinto Linares-Perdomo; Pooja Gupta; Tom Iverson                                                                                                                                                                                                                                     |
| EPI_ISL_9679647, EPI_ISL_9679649, EPI_ISL_9679650, EPI_ISL_9679652, EPI_ISL_9679653, EPI_ISL_9679654, EPI_ISL_9679657, EPI_ISL_9679660, EPI_ISL_9679661, EPI_ISL_9679662, EPI_ISL_9679663, EPI_ISL_9679664, EPI_ISL_9679666, EPI_ISL_9679667, EPI_ISL_9679668, EPI_ISL_9679669, EPI_ISL_9679671, EPI_ISL_9679672, EPI_ISL_9679674, EPI_ISL_9679675, EPI_ISL_9679676, EPI_ISL_9679677 | VERMAAK                                                                                                | National Institute for Communicable Diseases of the National Health Laboratory Service                                                                                                                                               | Amoako DG; Bhiman JN; Everatt J; Ismail A; Kekana D; Mahlangu B; Mnguni A; Mohale T; Ntuli N; Scheepers C; Wolter N                                                                                                                                                                                                              |
| EPI_ISL_9705819                                                                                                                                                                                                                                                                                                                                                                      | VITALABO Laboratoria Medyczne Sp. z o.o.                                                               | 101. Tricity SARS-CoV-2 sequencing consortium: University of Gdansk, Medical University of Gdansk, Vaxican Ltd., Invicta Ltd. 2. National Institute of Public Health - National Institute of Hygiene, Warsaw, Poland                 | Celina Cybulska; Karolina Gackowska; Katarzyna Groth; Katarzyna Zacharczuk; Krystyna Bienkowska Szewczyk; Lukasz Rabalski; Maciej Grzybek; Maciej Kosinski; Magdalena Nowakowska; Marcin Lubocki; Małgorzata Sadkowska-Todys; Tomasz Wołkowicz                                                                                   |
| EPI_ISL_9705823                                                                                                                                                                                                                                                                                                                                                                      | VITALABO Laboratoria Medyczne Sp. z o.o.                                                               | 105. Tricity SARS-CoV-2 sequencing consortium: University of Gdansk, Medical University of Gdansk, Vaxican Ltd., Invicta Ltd. 2. National Institute of Public Health - National Institute of Hygiene, Warsaw, Poland                 | Celina Cybulska; Karolina Gackowska; Katarzyna Groth; Katarzyna Zacharczuk; Krystyna Bienkowska Szewczyk; Lukasz Rabalski; Maciej Grzybek; Maciej Kosinski; Magdalena Nowakowska; Marcin Lubocki; Małgorzata Sadkowska-Todys; Tomasz Wołkowicz                                                                                   |
| EPI_ISL_9705829                                                                                                                                                                                                                                                                                                                                                                      | VITALABO Laboratoria Medyczne Sp. z o.o.                                                               | 111. Tricity SARS-CoV-2 sequencing consortium: University of Gdansk, Medical University of Gdansk, Vaxican Ltd., Invicta Ltd. 2. National Institute of Public Health - National Institute of Hygiene, Warsaw, Poland                 | Celina Cybulska; Karolina Gackowska; Katarzyna Groth; Katarzyna Zacharczuk; Krystyna Bienkowska Szewczyk; Lukasz Rabalski; Maciej Grzybek; Maciej Kosinski; Magdalena Nowakowska; Marcin Lubocki; Małgorzata Sadkowska-Todys; Tomasz Wołkowicz                                                                                   |
| EPI_ISL_9705831                                                                                                                                                                                                                                                                                                                                                                      | VITALABO Laboratoria Medyczne Sp. z o.o.                                                               | 113. Tricity SARS-CoV-2 sequencing consortium: University of Gdansk, Medical University of Gdansk, Vaxican Ltd., Invicta Ltd. 2. National Institute of Public Health - National Institute of Hygiene, Warsaw, Poland                 | Celina Cybulska; Karolina Gackowska; Katarzyna Groth; Katarzyna Zacharczuk; Krystyna Bienkowska Szewczyk; Lukasz Rabalski; Maciej Grzybek; Maciej Kosinski; Magdalena Nowakowska; Marcin Lubocki; Małgorzata Sadkowska-Todys; Tomasz Wołkowicz                                                                                   |
| EPI_ISL_9705832                                                                                                                                                                                                                                                                                                                                                                      | VITALABO Laboratoria Medyczne Sp. z o.o.                                                               | 114. Tricity SARS-CoV-2 sequencing consortium: University of Gdansk, Medical University of Gdansk, Vaxican Ltd., Invicta Ltd. 2. National Institute of Public Health - National Institute of Hygiene, Warsaw, Poland                 | Celina Cybulska; Karolina Gackowska; Katarzyna Groth; Katarzyna Zacharczuk; Krystyna Bienkowska Szewczyk; Lukasz Rabalski; Maciej Grzybek; Maciej Kosinski; Magdalena Nowakowska; Marcin Lubocki; Małgorzata Sadkowska-Todys; Tomasz Wołkowicz                                                                                   |
| EPI_ISL_9705833                                                                                                                                                                                                                                                                                                                                                                      | VITALABO Laboratoria Medyczne Sp. z o.o.                                                               | 115. Tricity SARS-CoV-2 sequencing consortium: University of Gdansk, Medical University of Gdansk, Vaxican Ltd., Invicta Ltd. 2. National Institute of Public Health - National Institute of Hygiene, Warsaw, Poland                 | Celina Cybulska; Karolina Gackowska; Katarzyna Groth; Katarzyna Zacharczuk; Krystyna Bienkowska Szewczyk; Lukasz Rabalski; Maciej Grzybek; Maciej Kosinski; Magdalena Nowakowska; Marcin Lubocki; Małgorzata Sadkowska-Todys; Tomasz Wołkowicz                                                                                   |

|                                                                                                                                                                                           |                                                                                                 |                                                                                                                                                                                                                                     |                                                                                                                                                                                                                                                                                                                                                                                                                                                                                                                                                                                                                                                                                                                               |
|-------------------------------------------------------------------------------------------------------------------------------------------------------------------------------------------|-------------------------------------------------------------------------------------------------|-------------------------------------------------------------------------------------------------------------------------------------------------------------------------------------------------------------------------------------|-------------------------------------------------------------------------------------------------------------------------------------------------------------------------------------------------------------------------------------------------------------------------------------------------------------------------------------------------------------------------------------------------------------------------------------------------------------------------------------------------------------------------------------------------------------------------------------------------------------------------------------------------------------------------------------------------------------------------------|
|                                                                                                                                                                                           |                                                                                                 | Public Health - National Institute of Hygiene, Warsaw, Poland                                                                                                                                                                       |                                                                                                                                                                                                                                                                                                                                                                                                                                                                                                                                                                                                                                                                                                                               |
| EPI_ISL_9705835                                                                                                                                                                           | VITALABO Laboratoria Medyczne Sp. z o.o.                                                        | 117. Tricity SARS-CoV-2 sequencing consortium: University of Gdansk, Medical University of Gdansk, Vaxican Ltd., Invicta Ltd. 2. National Institute of Public Health - National Institute of Hygiene, Warsaw, Poland                | Celina Cybulska; Karolina Gackowska; Katarzyna Groth; Katarzyna Zacharczuk; Krystyna Bienkowska Szewczyk; Lukasz Rabalski; Maciej Grzybek; Maciej Kosinski; Magdalena Nowakowska; Marcin Lubocki; Małgorzata Sadkowska-Todys; Tomasz Wołkowicz                                                                                                                                                                                                                                                                                                                                                                                                                                                                                |
| EPI_ISL_9705796                                                                                                                                                                           | VITALABO Laboratoria Medyczne Sp. z o.o.                                                        | 74. Tricity SARS-CoV-2 sequencing consortium: University of Gdansk, Medical University of Gdansk, Vaxican Ltd., Invicta Ltd. 2. National Institute of Public Health - National Institute of Hygiene, Warsaw, Poland                 | Celina Cybulska; Karolina Gackowska; Katarzyna Groth; Katarzyna Zacharczuk; Krystyna Bienkowska Szewczyk; Lukasz Rabalski; Maciej Grzybek; Maciej Kosinski; Magdalena Nowakowska; Marcin Lubocki; Małgorzata Sadkowska-Todys; Tomasz Wołkowicz                                                                                                                                                                                                                                                                                                                                                                                                                                                                                |
| EPI_ISL_9705804                                                                                                                                                                           | VITALABO Laboratoria Medyczne Sp. z o.o.                                                        | 82. Tricity SARS-CoV-2 sequencing consortium: University of Gdansk, Medical University of Gdansk, Vaxican Ltd., Invicta Ltd. 2. National Institute of Public Health - National Institute of Hygiene, Warsaw, Poland                 | Celina Cybulska; Karolina Gackowska; Katarzyna Groth; Katarzyna Zacharczuk; Krystyna Bienkowska Szewczyk; Lukasz Rabalski; Maciej Grzybek; Maciej Kosinski; Magdalena Nowakowska; Marcin Lubocki; Małgorzata Sadkowska-Todys; Tomasz Wołkowicz                                                                                                                                                                                                                                                                                                                                                                                                                                                                                |
| EPI_ISL_9705805                                                                                                                                                                           | VITALABO Laboratoria Medyczne Sp. z o.o.                                                        | 83. Tricity SARS-CoV-2 sequencing consortium: University of Gdansk, Medical University of Gdansk, Vaxican Ltd., Invicta Ltd. 2. National Institute of Public Health - National Institute of Hygiene, Warsaw, Poland                 | Celina Cybulska; Karolina Gackowska; Katarzyna Groth; Katarzyna Zacharczuk; Krystyna Bienkowska Szewczyk; Lukasz Rabalski; Maciej Grzybek; Maciej Kosinski; Magdalena Nowakowska; Marcin Lubocki; Małgorzata Sadkowska-Todys; Tomasz Wołkowicz                                                                                                                                                                                                                                                                                                                                                                                                                                                                                |
| EPI_ISL_9705811                                                                                                                                                                           | VITALABO Laboratoria Medyczne Sp. z o.o.                                                        | 90. Tricity SARS-CoV-2 sequencing consortium: University of Gdansk, Medical University of Gdansk, Vaxican Ltd., Invicta Ltd. 2. National Institute of Public Health - National Institute of Hygiene, Warsaw, Poland                 | Celina Cybulska; Karolina Gackowska; Katarzyna Groth; Katarzyna Zacharczuk; Krystyna Bienkowska Szewczyk; Lukasz Rabalski; Maciej Grzybek; Maciej Kosinski; Magdalena Nowakowska; Marcin Lubocki; Małgorzata Sadkowska-Todys; Tomasz Wołkowicz                                                                                                                                                                                                                                                                                                                                                                                                                                                                                |
| EPI_ISL_9705813                                                                                                                                                                           | VITALABO Laboratoria Medyczne Sp. z o.o.                                                        | 94. Tricity SARS-CoV-2 sequencing consortium: University of Gdansk, Medical University of Gdansk, Vaxican Ltd., Invicta Ltd. 2. National Institute of Public Health - National Institute of Hygiene, Warsaw, Poland                 | Celina Cybulska; Karolina Gackowska; Katarzyna Groth; Katarzyna Zacharczuk; Krystyna Bienkowska Szewczyk; Lukasz Rabalski; Maciej Grzybek; Maciej Kosinski; Magdalena Nowakowska; Marcin Lubocki; Małgorzata Sadkowska-Todys; Tomasz Wołkowicz                                                                                                                                                                                                                                                                                                                                                                                                                                                                                |
| EPI_ISL_9740651                                                                                                                                                                           | Viesoji istaiga Respublikine Siauliu Igonine                                                    | Vilnius University Hospital Santaros Klinikos, Center of Laboratory Medicine                                                                                                                                                        | Daniel Naumovas; Dovile Juozapaite; Gytis Dudas; Ingrida Olendraite; Ligita Raugaite; Monika Katenaite; Rimvydas Norvilas                                                                                                                                                                                                                                                                                                                                                                                                                                                                                                                                                                                                     |
| EPI_ISL_9770147, EPI_ISL_9770303, EPI_ISL_9770649, EPI_ISL_9770743, EPI_ISL_9770780, EPI_ISL_9770945, EPI_ISL_9771361, EPI_ISL_9771754, EPI_ISL_9773372, EPI_ISL_9773454, EPI_ISL_9773490 | see above                                                                                       | Department of Biosystems Science and Engineering, ETH Zürich                                                                                                                                                                        | Andrea Patrignani; Andrea Patrizia Salzmann; Andreia Cabral de Gouveia; Catharine Aquino Fournier; Chaoran Chen; Christian Beisel; Christian Urban; Christiane Beckmann; Christoph Noppen; Daniel Ehrsam; David Dreifuss; Doris Popovic; Elodie Burcklen; Franziska Singer; Griffin White; Hai Bui; Henriette Kurth; Ina Nissen; Isabel Stürmer; Ivan Topolsky; Jay Tracy; Kim Philipp Jablonski; Lara Fuhrmann; Laura Neff; Lennart Opitz; Louis du Plessis; Maria Domenica Moccia; Matteo Carrara; Maurice Redondo; Mirjam Feldkamp; Natascha Santacroce; Niko Beerenwinkel; Olivier Kobel; Pelin Icer; Ralph Schlapbach; Rebecca Denes; Sarah Nadeau; Shuqing Yu; Simon Grüter; Tanja Stadler; Timothy Sykes; Tobias Schär |
| EPI_ISL_9491184, EPI_ISL_9586367, EPI_ISL_9728309, EPI_ISL_9779914, EPI_ISL_9779918, EPI_ISL_9779922, EPI_ISL_9779939                                                                     | see above                                                                                       | Virology Department, Royal Infirmary of Edinburgh, NHS Lothian / School of Biological Sciences, University of Edinburgh                                                                                                             | COVID-19 Genomics UK (COG-UK) Consortium                                                                                                                                                                                                                                                                                                                                                                                                                                                                                                                                                                                                                                                                                      |
| EPI_ISL_9588361, EPI_ISL_9588362, EPI_ISL_9588365                                                                                                                                         | Virology Laboratory, International Centre for Diarrhoeal Disease Research, Bangladesh (ICDDR,B) | Virology Laboratory, International Centre for Diarrhoeal Disease Research, Bangladesh (ICDDR,B)                                                                                                                                     | ASM Alamgir; Ahmed Nawsher Alam; Dinesh Mondal; Firdausi Qadri; Hassan Afrad; Mahbubur Rahman; Manjur Hossain Khan; Md. Mahfuzur Rahman; Mohammad Enayet Hossain; Mohammad Jubair; Mohammad Shahidul Islam; Mohammed Ziaur Rahman; Mojuu Miah; Mustafizur Rahman; Rashedul Hasan; Razib Mazumder; Samir Kumar Saha; Senjuti Saha; Tahmina Shirin                                                                                                                                                                                                                                                                                                                                                                              |
| EPI_ISL_9463501, EPI_ISL_9463502, EPI_ISL_9463510                                                                                                                                         | Virology Unit, Institut Pasteur du Cambodge                                                     | Virology Unit, Institut Pasteur du Cambodge                                                                                                                                                                                         | Cecile Troupin; Chau Darapheak; Chin Savuth; Erik A Karlsson; Jurre Y Siegers; Kraing Sidonn; Leakhena Pum; Ly Sovann; Sophoannedh Rath; Veasna Duong; Yi Sengdoeurm                                                                                                                                                                                                                                                                                                                                                                                                                                                                                                                                                          |
| EPI_ISL_9191463, EPI_ISL_9191500                                                                                                                                                          | Virology, Universitätsklinikum des Saarlandes                                                   | Epigenetics, Saarland University                                                                                                                                                                                                    | Barbara Berko-Göttel Sascha Tierling; Jörn Walter; Kathrin Kattler; Sigrun Smola; Thorsten Pfuhl                                                                                                                                                                                                                                                                                                                                                                                                                                                                                                                                                                                                                              |
| EPI_ISL_9713361, EPI_ISL_9713390                                                                                                                                                          | Vitomed Sp. z o.o.                                                                              | 1. Academic Center for Pathomorphological and Genetic-Molecular Diagnostics Ltd, Białystok, Poland<br>2. National Institute of Public Health - National Institute of Hygiene, Warsaw, Poland                                        | Anetta Sulewska; Jacek Nikliński; Janusz Dzieciół; Joanna Kiśluk; Katarzyna Zacharczuk; Konrad Raczkowski; Magdalena Nowakowska; Małgorzata Sadkowska-Todys; Piotr Karabowicz; Piotr Majewski; Przemysław Bieчек. Joanna Reszeć; Radosław Charkiewicz; Tomasz Wołkowicz                                                                                                                                                                                                                                                                                                                                                                                                                                                       |
| EPI_ISL_9338305, EPI_ISL_9274071, EPI_ISL_9274072                                                                                                                                         | WHO National Influenza Centre Russian Federation WSSE Katowice                                  | WHO National Influenza Centre Russian Federation Wojewódzka Stacja Sanitarno-Epidemiologiczna w Katowicach                                                                                                                          | Andrey Komissarov; Artem Fadeev; Daria Danilenko; Dmitry Lioznov; Elena Nabieva; Georgii Bazzykin; Kirill Varchenko; Ksenia Safina; Kseniya Komissarova; Maria Pisareva; Mikhail Bakaev; Nikita Yolshin; Oula Mansour; Tamila Musaeva; Veronika Eder<br>Adrian Miara; Agata Chajda; Beata Rozwadowska; Elżbieta Bartkowiak; Marta Albertyńska                                                                                                                                                                                                                                                                                                                                                                                 |
| EPI_ISL_9618358, EPI_ISL_9618410, EPI_ISL_9618415, EPI_ISL_9618416, EPI_ISL_9618419, EPI_ISL_9618450, EPI_ISL_9618465, EPI_ISL_9618473, EPI_ISL_9618482                                   | see above                                                                                       | Wojewódzka Stacja Sanitarno-Epidemiologiczna w Olsztynie, Laboratorium Badan Epidemiologiczno-Klinicznych                                                                                                                           | Aleksandra Kobiatko; Barbara Dolinska; Emilia Tarabas; Ewa Liszewska; Marta Lukian; Monika Czerminska; Patryk Bielecki; Paulina Rozycka; Sylwia Krzetowska; Tomasz Jakubczak                                                                                                                                                                                                                                                                                                                                                                                                                                                                                                                                                  |
| EPI_ISL_9489469, EPI_ISL_9502925                                                                                                                                                          | WSSE w Olsztynie                                                                                | Wojewódzka Stacja Sanitarno-Epidemiologiczna w Olsztynie, Laboratorium Badan Epidemiologiczno-Klinicznych                                                                                                                           | Aleksandra Kobiatko; Barbara Dolinska; Emilia Tarabas; Ewa Liszewska; Marta Lukian; Monika Czerminska; Patryk Bielecki; Paulina Rozycka; Sylwia Krzetowska; Tomasz Jakubczak                                                                                                                                                                                                                                                                                                                                                                                                                                                                                                                                                  |
| EPI_ISL_9572012                                                                                                                                                                           | WSSE w Szczecinie - laboratorium                                                                | Wojewódzka Stacja Sanitarno-Epidemiologiczna w Gorzowie Wielkopolskim                                                                                                                                                               | Elżbieta Justynska; Klaudia Kobenzda-Włodarczak; Patrycja Faberska; Patrycja Rakowska and Marek Margol; Renata Siegel                                                                                                                                                                                                                                                                                                                                                                                                                                                                                                                                                                                                         |
| EPI_ISL_9400938, EPI_ISL_9400975                                                                                                                                                          | Washington State Department of Health Public Health Laboratories                                | Washington State Department of Health Public Health Laboratories                                                                                                                                                                    | Alex Latham; Ardizon Valdez; Avi Singh; Claire Howell; Denny Russell; Drew MacKellar; Holly Halstead; JohnAric Peterson; Kathryn Sickles; Kristin Roche; Lisa Jones; Philip Dykema; Rebecca Cao                                                                                                                                                                                                                                                                                                                                                                                                                                                                                                                               |
| EPI_ISL_9610205                                                                                                                                                                           | We Path Genexplore Laboratory, Vadodara                                                         | Gujarat Biotechnology Research Centre                                                                                                                                                                                               | Akhilesh Modi; Apurvasinh Puvav; Bhadreshsinh Gohil; Chaitanya Joshi; Disha Vora; Janvi Raval; Jaykumar Rangani; Madhvi Joshi; Nimesh Patel; Nitin Savaliya; NitinShukla; Priyank Chavda; Ramesh Pandit; Roshani Mishra; Sonal Sharma; Tasnim Trivedi; Twinkle Dhamecha; Zarna Patel                                                                                                                                                                                                                                                                                                                                                                                                                                          |
| EPI_ISL_9209630                                                                                                                                                                           | Wellington SCL (WN)                                                                             | Institute of Environmental Science and Research (ESR)                                                                                                                                                                               | Anja Werno; Antje van der Linden; Arlo Upton; Chris Mansell; Clare Gebbie; David Hammer; Dhanisha Patel; Dragana Drinkovic; Erasmus Smit; Gary McAuliffe; Hana Sofia Andersson; Hermes Perez; James Ussher; Jill Sherwood; Jing Wang; Joep de Lig; Josh Freeman; Julia Howard; Juliet Elvy; Lauren Jelly; Mary DeAlmeida; Matt Blakiston; Matt Storey; Matthew Rogers; Max Bloomfield; Michael Addidle; Michelle Balm; Muhammad Faisal; Nikki Freed; Olin Silander; Olivia Stroeven; Rachel Boyle; Sally Roberts; Sally Ann Harbison; Sarah Cockerton; Sarah Jefferies; Sharmini Muttaiyah; Susan Morpeth; Susan Taylor; Timothy Blackmore; Vani Sathyanandan; Veronica Playle; Virginia Hope; Xiaoyun Ren                    |
| EPI_ISL_9471345, EPI_ISL_9713486                                                                                                                                                          | Wyoming State Veterinary Laboratory Zakład Genetyki Synevo                                      | Wyoming State Veterinary Laboratory<br>1. Academic Center for Pathomorphological and Genetic-Molecular Diagnostics Ltd, Białystok, Poland<br>2. National Institute of Public Health - National Institute of Hygiene, Warsaw, Poland | Elizabeth Butkus; Hally Killion; Jennifer McKenna; Madison Vance; Marce Vasquez; Molly West; Taylor Fearing; Will Laegreid; and Robert Petit<br>Anetta Sulewska; Jacek Nikliński; Janusz Dzieciół; Joanna Kiśluk; Katarzyna Zacharczuk; Konrad Raczkowski; Magdalena Nowakowska; Małgorzata Sadkowska-Todys; Piotr Karabowicz; Piotr Majewski; Przemysław Bieчек. Joanna Reszeć; Radosław Charkiewicz; Tomasz Wołkowicz                                                                                                                                                                                                                                                                                                       |
| EPI_ISL_9497357, EPI_ISL_9739347, EPI_ISL_9739368                                                                                                                                         | Zavod za javno zdravstvo Medimurske županije<br>Zavod za javno zdravstvo Zagrebačke županije    | Hrvatski zavod za javno zdravstvo<br>Hrvatski zavod za javno zdravstvo                                                                                                                                                              | Anita Jurić; Dragan Jurić; Irena Tabain; Ivana Ferenčak; Josipa Kuzle<br>Anita Jurić; Dragan Jurić; Irena Tabain; Ivana Ferenčak; Josipa Kuzle                                                                                                                                                                                                                                                                                                                                                                                                                                                                                                                                                                                |
| EPI_ISL_9402987, EPI_ISL_9402988, EPI_ISL_9402989                                                                                                                                         | Zydus Hospital & Healthcare Research Pvt. Ltd.                                                  | Gujarat Biotechnology Research Centre                                                                                                                                                                                               | Akhilesh Modi; Apurvasinh Puvav; Bhadreshsinh Gohil; Chaitanya Joshi; Disha Vora; Janvi Raval; Jayesh Trivedi; Jaykumar Rangani; Jaymin Patel; Madhvi Joshi; Nimesh Patel; Nitin Savaliya; Nitin Shukla; Priyank Chavda; Ramesh Pandit; Roshani Mishra; Sonal Sharma; Tasnim Trivedi; Zarna Patel                                                                                                                                                                                                                                                                                                                                                                                                                             |
| EPI_ISL_9218454, EPI_ISL_9218494                                                                                                                                                          | alphaomega Labor GbR (Medizinische Kooperationsgemeinschaft Dres. Ackermann/Tennert/Zai8)       | Robert Koch Institute                                                                                                                                                                                                               |                                                                                                                                                                                                                                                                                                                                                                                                                                                                                                                                                                                                                                                                                                                               |
| EPI_ISL_9455398, EPI_ISL_9455467, EPI_ISL_9455478, EPI_ISL_9455678, EPI_ISL_9455681, EPI_ISL_9455799, EPI_ISL_9455809, EPI_ISL_9455862                                                    | see above                                                                                       | amedes Göttingen                                                                                                                                                                                                                    | Robert Koch Institute                                                                                                                                                                                                                                                                                                                                                                                                                                                                                                                                                                                                                                                                                                         |
| EPI_ISL_9455939, EPI_ISL_9455945                                                                                                                                                          | amedes MVZ DIAMEDIS Sennestadt                                                                  | Robert Koch Institute                                                                                                                                                                                                               |                                                                                                                                                                                                                                                                                                                                                                                                                                                                                                                                                                                                                                                                                                                               |
| EPI_ISL_9461493                                                                                                                                                                           | labopart - Medizinische Laboratorien Dresden                                                    | Robert Koch Institute                                                                                                                                                                                                               |                                                                                                                                                                                                                                                                                                                                                                                                                                                                                                                                                                                                                                                                                                                               |
| EPI_ISL_9225476, EPI_ISL_9225513, EPI_ISL_9225533                                                                                                                                         | nordlab - Partnerschaftspraxis für Laboratoriumsmedizin                                         | Robert Koch Institute                                                                                                                                                                                                               |                                                                                                                                                                                                                                                                                                                                                                                                                                                                                                                                                                                                                                                                                                                               |





|                                                                                                                                                                                                                                                                                                                                                                                                                                                                                                                                                                                                                                                                                                                                                                                                                                                                                                                                                                                                                                                                                                                                                                                                                                                                                                                                                                                                                                                                                                                                                                                                                                                                                                                                                                                                                                                                                                                                                                                                                                                                                                                                                                                                                                                                                                                                                                                                                                                                                                                                                                                                                                                                                                                                                                                                                                                                                                                                                                                                                                                                                                                                                                                                                                                                                                                                                                                                                                                                                                                                                                                                                                                                                                                                                                                                                                                                                                                                                                                                                                                                                                                                                                                                                                                                                                                                                                                                                                                                                                                                                                                                                                                                                                                                                                                                                                                                                                                                                                                                                                                                                                                                                                                                                                                                                                                                                                                                                                                                                                                                                                                                                                                                                                                                                                                                                                                                                                                                                                                                                                                                                                                                                                                                                                                                                                                                                                                                                                                                                                                                                                                                                                                                                                                                                                                                                                                                                                                                                                                                                                                                                                                                                                                                                                                                                                                                                                                                                                                                                                                                                                                                                                                                                                                                                                                                                                                                                                                                                                                                                                                                                                                                                                                                                                                                                                                                                                                                                                                                                                                                                                                                                                                                                                                                                                                                                                                                                                                                                                                                                                                                                                                                                                                                                                                                                                                                                                                                                                                                                                                                                                                                                                                                                                                                                                                                                                                                                                                                                                                                                                                                                                                                                                                                                                                                                                                                                                                                                                                                                                                                                                                                                                                                                                                                                                                                                                                                                                                                                                                                                                                                                                                                                                                                                                                                                                                                                                                                                                                                                                                                                                                                                                                                                                                                                                                                                                                                                                                                                                                                                                                                                                                                                                                                                                                                                                                                                                                                                                                                                                                                                                                                                                                                                                                                                                                                                                                                                                                                                                                                                                                                                                                                                                                                                                                                                                                                                                                                                                                                                                                                                                                                                                                                                                                                                         |                                                                                                                                      |                                                                                                                                                                                              |                                                                                                                                                                                                                                                                                                                                                                                                                                                                                                                                                                                                                                                                                                     |
|---------------------------------------------------------------------------------------------------------------------------------------------------------------------------------------------------------------------------------------------------------------------------------------------------------------------------------------------------------------------------------------------------------------------------------------------------------------------------------------------------------------------------------------------------------------------------------------------------------------------------------------------------------------------------------------------------------------------------------------------------------------------------------------------------------------------------------------------------------------------------------------------------------------------------------------------------------------------------------------------------------------------------------------------------------------------------------------------------------------------------------------------------------------------------------------------------------------------------------------------------------------------------------------------------------------------------------------------------------------------------------------------------------------------------------------------------------------------------------------------------------------------------------------------------------------------------------------------------------------------------------------------------------------------------------------------------------------------------------------------------------------------------------------------------------------------------------------------------------------------------------------------------------------------------------------------------------------------------------------------------------------------------------------------------------------------------------------------------------------------------------------------------------------------------------------------------------------------------------------------------------------------------------------------------------------------------------------------------------------------------------------------------------------------------------------------------------------------------------------------------------------------------------------------------------------------------------------------------------------------------------------------------------------------------------------------------------------------------------------------------------------------------------------------------------------------------------------------------------------------------------------------------------------------------------------------------------------------------------------------------------------------------------------------------------------------------------------------------------------------------------------------------------------------------------------------------------------------------------------------------------------------------------------------------------------------------------------------------------------------------------------------------------------------------------------------------------------------------------------------------------------------------------------------------------------------------------------------------------------------------------------------------------------------------------------------------------------------------------------------------------------------------------------------------------------------------------------------------------------------------------------------------------------------------------------------------------------------------------------------------------------------------------------------------------------------------------------------------------------------------------------------------------------------------------------------------------------------------------------------------------------------------------------------------------------------------------------------------------------------------------------------------------------------------------------------------------------------------------------------------------------------------------------------------------------------------------------------------------------------------------------------------------------------------------------------------------------------------------------------------------------------------------------------------------------------------------------------------------------------------------------------------------------------------------------------------------------------------------------------------------------------------------------------------------------------------------------------------------------------------------------------------------------------------------------------------------------------------------------------------------------------------------------------------------------------------------------------------------------------------------------------------------------------------------------------------------------------------------------------------------------------------------------------------------------------------------------------------------------------------------------------------------------------------------------------------------------------------------------------------------------------------------------------------------------------------------------------------------------------------------------------------------------------------------------------------------------------------------------------------------------------------------------------------------------------------------------------------------------------------------------------------------------------------------------------------------------------------------------------------------------------------------------------------------------------------------------------------------------------------------------------------------------------------------------------------------------------------------------------------------------------------------------------------------------------------------------------------------------------------------------------------------------------------------------------------------------------------------------------------------------------------------------------------------------------------------------------------------------------------------------------------------------------------------------------------------------------------------------------------------------------------------------------------------------------------------------------------------------------------------------------------------------------------------------------------------------------------------------------------------------------------------------------------------------------------------------------------------------------------------------------------------------------------------------------------------------------------------------------------------------------------------------------------------------------------------------------------------------------------------------------------------------------------------------------------------------------------------------------------------------------------------------------------------------------------------------------------------------------------------------------------------------------------------------------------------------------------------------------------------------------------------------------------------------------------------------------------------------------------------------------------------------------------------------------------------------------------------------------------------------------------------------------------------------------------------------------------------------------------------------------------------------------------------------------------------------------------------------------------------------------------------------------------------------------------------------------------------------------------------------------------------------------------------------------------------------------------------------------------------------------------------------------------------------------------------------------------------------------------------------------------------------------------------------------------------------------------------------------------------------------------------------------------------------------------------------------------------------------------------------------------------------------------------------------------------------------------------------------------------------------------------------------------------------------------------------------------------------------------------------------------------------------------------------------------------------------------------------------------------------------------------------------------------------------------------------------------------------------------------------------------------------------------------------------------------------------------------------------------------------------------------------------------------------------------------------------------------------------------------------------------------------------------------------------------------------------------------------------------------------------------------------------------------------------------------------------------------------------------------------------------------------------------------------------------------------------------------------------------------------------------------------------------------------------------------------------------------------------------------------------------------------------------------------------------------------------------------------------------------------------------------------------------------------------------------------------------------------------------------------------------------------------------------------------------------------------------------------------------------------------------------------------------------------------------------------------------------------------------------------------------------------------------------------------------------------------------------------------------------------------------------------------------------------------------------------------------------------------------------------------------------------------------------------------------------------------------------------------------------------------------------------------------------------------------------------------------------------------------------------------------------------------------------------------------------------------------------------------------------------------------------------------------------------------------------------------------------------------------------------------------------------------------------------------------------------------------------------------------------------------------------------------------------------------------------------------------------------------------------------------------------------------------------------------------------------------------------------------------------------------------------------------------------------------------------------------------------------------------------------------------------------------------------------------------------------------------------------------------------------------------------------------------------------------------------------------------------------------------------------------------------------------------------------------------------------------------------------------------------------------------------------------------------------------------------------------------------------------------------------------------------------------------------------------------------------------------------------------------------------------------------------------------------------------------------------------------------------------------------------------------------------------------------------------------------------------------------------------------------------------------------------------------------------------------------------------------------------------------------------------------------------------------------------------------------------------------------------------------------------------------------------------------------------------------------------------------------------------------------------------------------------------------------------------------------------------------------------------------------------------------------------------------------------------------------------------------------------------------------------------------------------------------------------------------------------------------------------------------------|--------------------------------------------------------------------------------------------------------------------------------------|----------------------------------------------------------------------------------------------------------------------------------------------------------------------------------------------|-----------------------------------------------------------------------------------------------------------------------------------------------------------------------------------------------------------------------------------------------------------------------------------------------------------------------------------------------------------------------------------------------------------------------------------------------------------------------------------------------------------------------------------------------------------------------------------------------------------------------------------------------------------------------------------------------------|
| EPI_ISL_942590                                                                                                                                                                                                                                                                                                                                                                                                                                                                                                                                                                                                                                                                                                                                                                                                                                                                                                                                                                                                                                                                                                                                                                                                                                                                                                                                                                                                                                                                                                                                                                                                                                                                                                                                                                                                                                                                                                                                                                                                                                                                                                                                                                                                                                                                                                                                                                                                                                                                                                                                                                                                                                                                                                                                                                                                                                                                                                                                                                                                                                                                                                                                                                                                                                                                                                                                                                                                                                                                                                                                                                                                                                                                                                                                                                                                                                                                                                                                                                                                                                                                                                                                                                                                                                                                                                                                                                                                                                                                                                                                                                                                                                                                                                                                                                                                                                                                                                                                                                                                                                                                                                                                                                                                                                                                                                                                                                                                                                                                                                                                                                                                                                                                                                                                                                                                                                                                                                                                                                                                                                                                                                                                                                                                                                                                                                                                                                                                                                                                                                                                                                                                                                                                                                                                                                                                                                                                                                                                                                                                                                                                                                                                                                                                                                                                                                                                                                                                                                                                                                                                                                                                                                                                                                                                                                                                                                                                                                                                                                                                                                                                                                                                                                                                                                                                                                                                                                                                                                                                                                                                                                                                                                                                                                                                                                                                                                                                                                                                                                                                                                                                                                                                                                                                                                                                                                                                                                                                                                                                                                                                                                                                                                                                                                                                                                                                                                                                                                                                                                                                                                                                                                                                                                                                                                                                                                                                                                                                                                                                                                                                                                                                                                                                                                                                                                                                                                                                                                                                                                                                                                                                                                                                                                                                                                                                                                                                                                                                                                                                                                                                                                                                                                                                                                                                                                                                                                                                                                                                                                                                                                                                                                                                                                                                                                                                                                                                                                                                                                                                                                                                                                                                                                                                                                                                                                                                                                                                                                                                                                                                                                                                                                                                                                                                                                                                                                                                                                                                                                                                                                                                                                                                                                                                                                                                          | CHUGA-IBP-laboratoire de Virologie                                                                                                   | IBP-laboratoire de virologie                                                                                                                                                                 | Alban Caporossi; Anne Signori -Schmuck; Anne-Karen Faure; Aurélie Truffot; Benjamin Nemoz; Hugo Jardin; Julien Andréani; Julien Lupo; Léa Ponderand; Pascal Poignard; Patrice Morand; Raphaële Germi; Sylvie Larrat                                                                                                                                                                                                                                                                                                                                                                                                                                                                                 |
| EPI_ISL_9606357                                                                                                                                                                                                                                                                                                                                                                                                                                                                                                                                                                                                                                                                                                                                                                                                                                                                                                                                                                                                                                                                                                                                                                                                                                                                                                                                                                                                                                                                                                                                                                                                                                                                                                                                                                                                                                                                                                                                                                                                                                                                                                                                                                                                                                                                                                                                                                                                                                                                                                                                                                                                                                                                                                                                                                                                                                                                                                                                                                                                                                                                                                                                                                                                                                                                                                                                                                                                                                                                                                                                                                                                                                                                                                                                                                                                                                                                                                                                                                                                                                                                                                                                                                                                                                                                                                                                                                                                                                                                                                                                                                                                                                                                                                                                                                                                                                                                                                                                                                                                                                                                                                                                                                                                                                                                                                                                                                                                                                                                                                                                                                                                                                                                                                                                                                                                                                                                                                                                                                                                                                                                                                                                                                                                                                                                                                                                                                                                                                                                                                                                                                                                                                                                                                                                                                                                                                                                                                                                                                                                                                                                                                                                                                                                                                                                                                                                                                                                                                                                                                                                                                                                                                                                                                                                                                                                                                                                                                                                                                                                                                                                                                                                                                                                                                                                                                                                                                                                                                                                                                                                                                                                                                                                                                                                                                                                                                                                                                                                                                                                                                                                                                                                                                                                                                                                                                                                                                                                                                                                                                                                                                                                                                                                                                                                                                                                                                                                                                                                                                                                                                                                                                                                                                                                                                                                                                                                                                                                                                                                                                                                                                                                                                                                                                                                                                                                                                                                                                                                                                                                                                                                                                                                                                                                                                                                                                                                                                                                                                                                                                                                                                                                                                                                                                                                                                                                                                                                                                                                                                                                                                                                                                                                                                                                                                                                                                                                                                                                                                                                                                                                                                                                                                                                                                                                                                                                                                                                                                                                                                                                                                                                                                                                                                                                                                                                                                                                                                                                                                                                                                                                                                                                                                                                                                                                         | CHULN - H Santa Maria                                                                                                                | Instituto Nacional de Saude (INSA)                                                                                                                                                           | Borges et al                                                                                                                                                                                                                                                                                                                                                                                                                                                                                                                                                                                                                                                                                        |
| EPI_ISL_9509650                                                                                                                                                                                                                                                                                                                                                                                                                                                                                                                                                                                                                                                                                                                                                                                                                                                                                                                                                                                                                                                                                                                                                                                                                                                                                                                                                                                                                                                                                                                                                                                                                                                                                                                                                                                                                                                                                                                                                                                                                                                                                                                                                                                                                                                                                                                                                                                                                                                                                                                                                                                                                                                                                                                                                                                                                                                                                                                                                                                                                                                                                                                                                                                                                                                                                                                                                                                                                                                                                                                                                                                                                                                                                                                                                                                                                                                                                                                                                                                                                                                                                                                                                                                                                                                                                                                                                                                                                                                                                                                                                                                                                                                                                                                                                                                                                                                                                                                                                                                                                                                                                                                                                                                                                                                                                                                                                                                                                                                                                                                                                                                                                                                                                                                                                                                                                                                                                                                                                                                                                                                                                                                                                                                                                                                                                                                                                                                                                                                                                                                                                                                                                                                                                                                                                                                                                                                                                                                                                                                                                                                                                                                                                                                                                                                                                                                                                                                                                                                                                                                                                                                                                                                                                                                                                                                                                                                                                                                                                                                                                                                                                                                                                                                                                                                                                                                                                                                                                                                                                                                                                                                                                                                                                                                                                                                                                                                                                                                                                                                                                                                                                                                                                                                                                                                                                                                                                                                                                                                                                                                                                                                                                                                                                                                                                                                                                                                                                                                                                                                                                                                                                                                                                                                                                                                                                                                                                                                                                                                                                                                                                                                                                                                                                                                                                                                                                                                                                                                                                                                                                                                                                                                                                                                                                                                                                                                                                                                                                                                                                                                                                                                                                                                                                                                                                                                                                                                                                                                                                                                                                                                                                                                                                                                                                                                                                                                                                                                                                                                                                                                                                                                                                                                                                                                                                                                                                                                                                                                                                                                                                                                                                                                                                                                                                                                                                                                                                                                                                                                                                                                                                                                                                                                                                                                                         | CMD SIEDLCE                                                                                                                          | 1. Academic Center for Pathomorphological and Genetic-Molecular Diagnostics Ltd, Białystok, Poland<br>2. National Institute of Public Health - National Institute of Hygiene, Warsaw, Poland | Anetta Sulewska; Jacek Nikliński; Janusz Dzięcioł; Joanna Kisłuk; Katarzyna Zacharczuk; Konrad Raczkowski; Magdalena Nowakowska; Malgorzata Sadkowska-Todys; Piotr Karabowicz; Piotr Majewski; Przemyslaw Biecek. Joanna Reszcz; Radoslaw Charkiewicz; Tomasz Wolkowicz                                                                                                                                                                                                                                                                                                                                                                                                                             |
| EPI_ISL_9550427, EPI_ISL_9550429, EPI_ISL_9550434                                                                                                                                                                                                                                                                                                                                                                                                                                                                                                                                                                                                                                                                                                                                                                                                                                                                                                                                                                                                                                                                                                                                                                                                                                                                                                                                                                                                                                                                                                                                                                                                                                                                                                                                                                                                                                                                                                                                                                                                                                                                                                                                                                                                                                                                                                                                                                                                                                                                                                                                                                                                                                                                                                                                                                                                                                                                                                                                                                                                                                                                                                                                                                                                                                                                                                                                                                                                                                                                                                                                                                                                                                                                                                                                                                                                                                                                                                                                                                                                                                                                                                                                                                                                                                                                                                                                                                                                                                                                                                                                                                                                                                                                                                                                                                                                                                                                                                                                                                                                                                                                                                                                                                                                                                                                                                                                                                                                                                                                                                                                                                                                                                                                                                                                                                                                                                                                                                                                                                                                                                                                                                                                                                                                                                                                                                                                                                                                                                                                                                                                                                                                                                                                                                                                                                                                                                                                                                                                                                                                                                                                                                                                                                                                                                                                                                                                                                                                                                                                                                                                                                                                                                                                                                                                                                                                                                                                                                                                                                                                                                                                                                                                                                                                                                                                                                                                                                                                                                                                                                                                                                                                                                                                                                                                                                                                                                                                                                                                                                                                                                                                                                                                                                                                                                                                                                                                                                                                                                                                                                                                                                                                                                                                                                                                                                                                                                                                                                                                                                                                                                                                                                                                                                                                                                                                                                                                                                                                                                                                                                                                                                                                                                                                                                                                                                                                                                                                                                                                                                                                                                                                                                                                                                                                                                                                                                                                                                                                                                                                                                                                                                                                                                                                                                                                                                                                                                                                                                                                                                                                                                                                                                                                                                                                                                                                                                                                                                                                                                                                                                                                                                                                                                                                                                                                                                                                                                                                                                                                                                                                                                                                                                                                                                                                                                                                                                                                                                                                                                                                                                                                                                                                                                                                                                       | COVID-19 Detection Lab, Chattogram Veterinary and Animal Sciences University                                                         | COVID-19 Detection Lab, Chattogram Veterinary and Animal Sciences University                                                                                                                 | 56. Goutam Buddha Das; 56. Tanvir Ahmad Nazim; 60. Pronesch Dutta; 60. Pronesch Dutta; Barna Goswami; Eaftekhah Ahmed Rana; Goutam Buddha Das; Iffat Jaham; Md. Ahasan Habib; Md. Murshed Hasan Sarkar; Md. Saïm Khan; Md. Sirazul Ulumi; Mohammad Moh Uddin; Paritosh Kumar Biswas; Pronesch Dutta; Sanjana Fatema Chowdhury; Shahina Akter; Sharmin Chowdhury; Showta Raheel Nasser; Tanjina Akhter Banu; Tanvir Ahmad Nazim; Tridip Das                                                                                                                                                                                                                                                          |
| EPI_ISL_9336247, EPI_ISL_9336251, EPI_ISL_9336254, EPI_ISL_9336264, EPI_ISL_9336266, EPI_ISL_9336268, EPI_ISL_9336273, EPI_ISL_9336274, EPI_ISL_9336277, EPI_ISL_9336284, EPI_ISL_9336289, EPI_ISL_9336291, EPI_ISL_9336298, EPI_ISL_9336307, EPI_ISL_9336310, EPI_ISL_9336311, EPI_ISL_9336315, EPI_ISL_9336320, EPI_ISL_9336321, EPI_ISL_9336322, EPI_ISL_9336327, EPI_ISL_9336330, EPI_ISL_9336336, EPI_ISL_9352422, EPI_ISL_9352438, EPI_ISL_9352439, EPI_ISL_9352446, EPI_ISL_9352451, EPI_ISL_9352453, EPI_ISL_9352463, EPI_ISL_9352467, EPI_ISL_9352477, EPI_ISL_9352480, EPI_ISL_9352481, EPI_ISL_9352482, EPI_ISL_9352483, EPI_ISL_9352484, EPI_ISL_9352500                                                                                                                                                                                                                                                                                                                                                                                                                                                                                                                                                                                                                                                                                                                                                                                                                                                                                                                                                                                                                                                                                                                                                                                                                                                                                                                                                                                                                                                                                                                                                                                                                                                                                                                                                                                                                                                                                                                                                                                                                                                                                                                                                                                                                                                                                                                                                                                                                                                                                                                                                                                                                                                                                                                                                                                                                                                                                                                                                                                                                                                                                                                                                                                                                                                                                                                                                                                                                                                                                                                                                                                                                                                                                                                                                                                                                                                                                                                                                                                                                                                                                                                                                                                                                                                                                                                                                                                                                                                                                                                                                                                                                                                                                                                                                                                                                                                                                                                                                                                                                                                                                                                                                                                                                                                                                                                                                                                                                                                                                                                                                                                                                                                                                                                                                                                                                                                                                                                                                                                                                                                                                                                                                                                                                                                                                                                                                                                                                                                                                                                                                                                                                                                                                                                                                                                                                                                                                                                                                                                                                                                                                                                                                                                                                                                                                                                                                                                                                                                                                                                                                                                                                                                                                                                                                                                                                                                                                                                                                                                                                                                                                                                                                                                                                                                                                                                                                                                                                                                                                                                                                                                                                                                                                                                                                                                                                                                                                                                                                                                                                                                                                                                                                                                                                                                                                                                                                                                                                                                                                                                                                                                                                                                                                                                                                                                                                                                                                                                                                                                                                                                                                                                                                                                                                                                                                                                                                                                                                                                                                                                                                                                                                                                                                                                                                                                                                                                                                                                                                                                                                                                                                                                                                                                                                                                                                                                                                                                                                                                                                                                                                                                                                                                                                                                                                                                                                                                                                                                                                                                                                                                                                                                                                                                                                                                                                                                                                                                                                                                                                                                                                                                                                                                                                                                                                                                                                                                                                                                                                                                                                                                                                    | see above                                                                                                                            | CSIR-NEERI, Nagpur Covid-19 Testing Lab<br>CSIR-NEERI, Nagpur Covid-19 Testing Lab                                                                                                           | Krishna Khairam et al.                                                                                                                                                                                                                                                                                                                                                                                                                                                                                                                                                                                                                                                                              |
| EPI_ISL_9209587                                                                                                                                                                                                                                                                                                                                                                                                                                                                                                                                                                                                                                                                                                                                                                                                                                                                                                                                                                                                                                                                                                                                                                                                                                                                                                                                                                                                                                                                                                                                                                                                                                                                                                                                                                                                                                                                                                                                                                                                                                                                                                                                                                                                                                                                                                                                                                                                                                                                                                                                                                                                                                                                                                                                                                                                                                                                                                                                                                                                                                                                                                                                                                                                                                                                                                                                                                                                                                                                                                                                                                                                                                                                                                                                                                                                                                                                                                                                                                                                                                                                                                                                                                                                                                                                                                                                                                                                                                                                                                                                                                                                                                                                                                                                                                                                                                                                                                                                                                                                                                                                                                                                                                                                                                                                                                                                                                                                                                                                                                                                                                                                                                                                                                                                                                                                                                                                                                                                                                                                                                                                                                                                                                                                                                                                                                                                                                                                                                                                                                                                                                                                                                                                                                                                                                                                                                                                                                                                                                                                                                                                                                                                                                                                                                                                                                                                                                                                                                                                                                                                                                                                                                                                                                                                                                                                                                                                                                                                                                                                                                                                                                                                                                                                                                                                                                                                                                                                                                                                                                                                                                                                                                                                                                                                                                                                                                                                                                                                                                                                                                                                                                                                                                                                                                                                                                                                                                                                                                                                                                                                                                                                                                                                                                                                                                                                                                                                                                                                                                                                                                                                                                                                                                                                                                                                                                                                                                                                                                                                                                                                                                                                                                                                                                                                                                                                                                                                                                                                                                                                                                                                                                                                                                                                                                                                                                                                                                                                                                                                                                                                                                                                                                                                                                                                                                                                                                                                                                                                                                                                                                                                                                                                                                                                                                                                                                                                                                                                                                                                                                                                                                                                                                                                                                                                                                                                                                                                                                                                                                                                                                                                                                                                                                                                                                                                                                                                                                                                                                                                                                                                                                                                                                                                                                                                         | Canterbury Health Laboratories                                                                                                       | Institute of Environmental Science and Research (ESR)                                                                                                                                        | Anja Werner; Antje van der Linden; Arlo Upton; Chris Mansell; Clare Giebbie; David Hammer; Dhanisha Patel; Dragana Drinkovic; Erasmus Smith; Gary Mulcaiff; Hana Sofia Anderson; Hermes Perez; James Usher; Jill Sheward; Jing Wang; Joep de Lig; John Freeman; Julia Howard; Juliet Elvy; Lauren Jely; Mary DeAlmeida; Matt Blakiston; Matt Storey; Matthew Rogers; Max Bloomfield; Michael Addide; Michele Bam; Muhammad Faisal; Nikki Freed; Olin Pilander; Olivia Stroeven; Rachel Boyle; Sally Roberts; SallyAnn Harbour; Sarah Cockerton; Sarah Jefferies; Sharmini Mutaiyaji; Susan Morpeth; Susan Taylor; Timothy Blackmore; Vani Satthyendran; Veronica Playle; Virginia Hope; Xiaoyun Ren |
| EPI_ISL_9220041                                                                                                                                                                                                                                                                                                                                                                                                                                                                                                                                                                                                                                                                                                                                                                                                                                                                                                                                                                                                                                                                                                                                                                                                                                                                                                                                                                                                                                                                                                                                                                                                                                                                                                                                                                                                                                                                                                                                                                                                                                                                                                                                                                                                                                                                                                                                                                                                                                                                                                                                                                                                                                                                                                                                                                                                                                                                                                                                                                                                                                                                                                                                                                                                                                                                                                                                                                                                                                                                                                                                                                                                                                                                                                                                                                                                                                                                                                                                                                                                                                                                                                                                                                                                                                                                                                                                                                                                                                                                                                                                                                                                                                                                                                                                                                                                                                                                                                                                                                                                                                                                                                                                                                                                                                                                                                                                                                                                                                                                                                                                                                                                                                                                                                                                                                                                                                                                                                                                                                                                                                                                                                                                                                                                                                                                                                                                                                                                                                                                                                                                                                                                                                                                                                                                                                                                                                                                                                                                                                                                                                                                                                                                                                                                                                                                                                                                                                                                                                                                                                                                                                                                                                                                                                                                                                                                                                                                                                                                                                                                                                                                                                                                                                                                                                                                                                                                                                                                                                                                                                                                                                                                                                                                                                                                                                                                                                                                                                                                                                                                                                                                                                                                                                                                                                                                                                                                                                                                                                                                                                                                                                                                                                                                                                                                                                                                                                                                                                                                                                                                                                                                                                                                                                                                                                                                                                                                                                                                                                                                                                                                                                                                                                                                                                                                                                                                                                                                                                                                                                                                                                                                                                                                                                                                                                                                                                                                                                                                                                                                                                                                                                                                                                                                                                                                                                                                                                                                                                                                                                                                                                                                                                                                                                                                                                                                                                                                                                                                                                                                                                                                                                                                                                                                                                                                                                                                                                                                                                                                                                                                                                                                                                                                                                                                                                                                                                                                                                                                                                                                                                                                                                                                                                                                                                                                         | Center for Laboratory Medicine                                                                                                       | Center for Laboratory Medicine, ZLMSG                                                                                                                                                        | Yannick Gerth                                                                                                                                                                                                                                                                                                                                                                                                                                                                                                                                                                                                                                                                                       |
| EPI_ISL_9626935, EPI_ISL_9626936, EPI_ISL_9626937, EPI_ISL_9626938                                                                                                                                                                                                                                                                                                                                                                                                                                                                                                                                                                                                                                                                                                                                                                                                                                                                                                                                                                                                                                                                                                                                                                                                                                                                                                                                                                                                                                                                                                                                                                                                                                                                                                                                                                                                                                                                                                                                                                                                                                                                                                                                                                                                                                                                                                                                                                                                                                                                                                                                                                                                                                                                                                                                                                                                                                                                                                                                                                                                                                                                                                                                                                                                                                                                                                                                                                                                                                                                                                                                                                                                                                                                                                                                                                                                                                                                                                                                                                                                                                                                                                                                                                                                                                                                                                                                                                                                                                                                                                                                                                                                                                                                                                                                                                                                                                                                                                                                                                                                                                                                                                                                                                                                                                                                                                                                                                                                                                                                                                                                                                                                                                                                                                                                                                                                                                                                                                                                                                                                                                                                                                                                                                                                                                                                                                                                                                                                                                                                                                                                                                                                                                                                                                                                                                                                                                                                                                                                                                                                                                                                                                                                                                                                                                                                                                                                                                                                                                                                                                                                                                                                                                                                                                                                                                                                                                                                                                                                                                                                                                                                                                                                                                                                                                                                                                                                                                                                                                                                                                                                                                                                                                                                                                                                                                                                                                                                                                                                                                                                                                                                                                                                                                                                                                                                                                                                                                                                                                                                                                                                                                                                                                                                                                                                                                                                                                                                                                                                                                                                                                                                                                                                                                                                                                                                                                                                                                                                                                                                                                                                                                                                                                                                                                                                                                                                                                                                                                                                                                                                                                                                                                                                                                                                                                                                                                                                                                                                                                                                                                                                                                                                                                                                                                                                                                                                                                                                                                                                                                                                                                                                                                                                                                                                                                                                                                                                                                                                                                                                                                                                                                                                                                                                                                                                                                                                                                                                                                                                                                                                                                                                                                                                                                                                                                                                                                                                                                                                                                                                                                                                                                                                                                                                                      | Center for Virology, Medical University of Vienna                                                                                    | Bergthaler laboratory, CeMM Research Center for Molecular Medicine of the Austrian Academy of Sciences                                                                                       | Andreas Bergthaler; Anna Schedl; Bekir Erguner; Benedikt Agerer; Christoph Bock; Fabian Aman; Jan Laina; Lukas Endler; Martin Senekowitsch; Matthew Thornton; Michael Schuster; Michelle Chan; Petr Triska; Thomas Penz                                                                                                                                                                                                                                                                                                                                                                                                                                                                             |
| EPI_ISL_9594987, EPI_ISL_9750055, EPI_ISL_9750102                                                                                                                                                                                                                                                                                                                                                                                                                                                                                                                                                                                                                                                                                                                                                                                                                                                                                                                                                                                                                                                                                                                                                                                                                                                                                                                                                                                                                                                                                                                                                                                                                                                                                                                                                                                                                                                                                                                                                                                                                                                                                                                                                                                                                                                                                                                                                                                                                                                                                                                                                                                                                                                                                                                                                                                                                                                                                                                                                                                                                                                                                                                                                                                                                                                                                                                                                                                                                                                                                                                                                                                                                                                                                                                                                                                                                                                                                                                                                                                                                                                                                                                                                                                                                                                                                                                                                                                                                                                                                                                                                                                                                                                                                                                                                                                                                                                                                                                                                                                                                                                                                                                                                                                                                                                                                                                                                                                                                                                                                                                                                                                                                                                                                                                                                                                                                                                                                                                                                                                                                                                                                                                                                                                                                                                                                                                                                                                                                                                                                                                                                                                                                                                                                                                                                                                                                                                                                                                                                                                                                                                                                                                                                                                                                                                                                                                                                                                                                                                                                                                                                                                                                                                                                                                                                                                                                                                                                                                                                                                                                                                                                                                                                                                                                                                                                                                                                                                                                                                                                                                                                                                                                                                                                                                                                                                                                                                                                                                                                                                                                                                                                                                                                                                                                                                                                                                                                                                                                                                                                                                                                                                                                                                                                                                                                                                                                                                                                                                                                                                                                                                                                                                                                                                                                                                                                                                                                                                                                                                                                                                                                                                                                                                                                                                                                                                                                                                                                                                                                                                                                                                                                                                                                                                                                                                                                                                                                                                                                                                                                                                                                                                                                                                                                                                                                                                                                                                                                                                                                                                                                                                                                                                                                                                                                                                                                                                                                                                                                                                                                                                                                                                                                                                                                                                                                                                                                                                                                                                                                                                                                                                                                                                                                                                                                                                                                                                                                                                                                                                                                                                                                                                                                                                                                                       | Centrale Laboratorium Ginecologiczo Poloniezkiego Szpitala Klinicznego Uniwersytetu Medycznego im. Karola Marcinkowskiego w Poznaniu | Wojewódzka Stacja Sanitarno-Epidemiologiczna w Łodzi, Oddział Laborystyki Mikrobiologii i Parazytologii                                                                                      | Agnieszka Karnowska; Aleksandra Krawczyk; Danuta Bartczak; Elian Terpo; Katarzyna Kosowska; Lucyna Kochanowska; Marta Gawronska; Martyna Matera; Szymon Konkolewski                                                                                                                                                                                                                                                                                                                                                                                                                                                                                                                                 |
| EPI_ISL_9791321, EPI_ISL_9791325, EPI_ISL_9791328, EPI_ISL_9791339, EPI_ISL_9791341, EPI_ISL_9791342                                                                                                                                                                                                                                                                                                                                                                                                                                                                                                                                                                                                                                                                                                                                                                                                                                                                                                                                                                                                                                                                                                                                                                                                                                                                                                                                                                                                                                                                                                                                                                                                                                                                                                                                                                                                                                                                                                                                                                                                                                                                                                                                                                                                                                                                                                                                                                                                                                                                                                                                                                                                                                                                                                                                                                                                                                                                                                                                                                                                                                                                                                                                                                                                                                                                                                                                                                                                                                                                                                                                                                                                                                                                                                                                                                                                                                                                                                                                                                                                                                                                                                                                                                                                                                                                                                                                                                                                                                                                                                                                                                                                                                                                                                                                                                                                                                                                                                                                                                                                                                                                                                                                                                                                                                                                                                                                                                                                                                                                                                                                                                                                                                                                                                                                                                                                                                                                                                                                                                                                                                                                                                                                                                                                                                                                                                                                                                                                                                                                                                                                                                                                                                                                                                                                                                                                                                                                                                                                                                                                                                                                                                                                                                                                                                                                                                                                                                                                                                                                                                                                                                                                                                                                                                                                                                                                                                                                                                                                                                                                                                                                                                                                                                                                                                                                                                                                                                                                                                                                                                                                                                                                                                                                                                                                                                                                                                                                                                                                                                                                                                                                                                                                                                                                                                                                                                                                                                                                                                                                                                                                                                                                                                                                                                                                                                                                                                                                                                                                                                                                                                                                                                                                                                                                                                                                                                                                                                                                                                                                                                                                                                                                                                                                                                                                                                                                                                                                                                                                                                                                                                                                                                                                                                                                                                                                                                                                                                                                                                                                                                                                                                                                                                                                                                                                                                                                                                                                                                                                                                                                                                                                                                                                                                                                                                                                                                                                                                                                                                                                                                                                                                                                                                                                                                                                                                                                                                                                                                                                                                                                                                                                                                                                                                                                                                                                                                                                                                                                                                                                                                                                                                                                                                                    | Centre Hospitalier Universitaire de Rouen Laboratoire de Virologie                                                                   | Centre Hospitalier Universitaire de Rouen Laboratoire de Virologie                                                                                                                           | Alice Moisan; Fabienne De Oliveira; Marie Leoz                                                                                                                                                                                                                                                                                                                                                                                                                                                                                                                                                                                                                                                      |
| EPI_ISL_9357112                                                                                                                                                                                                                                                                                                                                                                                                                                                                                                                                                                                                                                                                                                                                                                                                                                                                                                                                                                                                                                                                                                                                                                                                                                                                                                                                                                                                                                                                                                                                                                                                                                                                                                                                                                                                                                                                                                                                                                                                                                                                                                                                                                                                                                                                                                                                                                                                                                                                                                                                                                                                                                                                                                                                                                                                                                                                                                                                                                                                                                                                                                                                                                                                                                                                                                                                                                                                                                                                                                                                                                                                                                                                                                                                                                                                                                                                                                                                                                                                                                                                                                                                                                                                                                                                                                                                                                                                                                                                                                                                                                                                                                                                                                                                                                                                                                                                                                                                                                                                                                                                                                                                                                                                                                                                                                                                                                                                                                                                                                                                                                                                                                                                                                                                                                                                                                                                                                                                                                                                                                                                                                                                                                                                                                                                                                                                                                                                                                                                                                                                                                                                                                                                                                                                                                                                                                                                                                                                                                                                                                                                                                                                                                                                                                                                                                                                                                                                                                                                                                                                                                                                                                                                                                                                                                                                                                                                                                                                                                                                                                                                                                                                                                                                                                                                                                                                                                                                                                                                                                                                                                                                                                                                                                                                                                                                                                                                                                                                                                                                                                                                                                                                                                                                                                                                                                                                                                                                                                                                                                                                                                                                                                                                                                                                                                                                                                                                                                                                                                                                                                                                                                                                                                                                                                                                                                                                                                                                                                                                                                                                                                                                                                                                                                                                                                                                                                                                                                                                                                                                                                                                                                                                                                                                                                                                                                                                                                                                                                                                                                                                                                                                                                                                                                                                                                                                                                                                                                                                                                                                                                                                                                                                                                                                                                                                                                                                                                                                                                                                                                                                                                                                                                                                                                                                                                                                                                                                                                                                                                                                                                                                                                                                                                                                                                                                                                                                                                                                                                                                                                                                                                                                                                                                                                                                         | Centrum Medycznej Diagnostyki Laboratoryjnej i Badan Przesiewowych Instytut Centrum Zdrowia Matki Polki                              | Wojewódzka Stacja Sanitarno-Epidemiologiczna w Łodzi, Oddział Laborystyki Mikrobiologii i Parazytologii                                                                                      | Agnieszka Karnowska; Aleksandra Krawczyk; Danuta Bartczak; Elian Terpo; Katarzyna Kosowska; Lucyna Kochanowska; Marta Gawronska; Martyna Matera; Szymon Konkolewski                                                                                                                                                                                                                                                                                                                                                                                                                                                                                                                                 |
| EPI_ISL_9446283, EPI_ISL_9446315                                                                                                                                                                                                                                                                                                                                                                                                                                                                                                                                                                                                                                                                                                                                                                                                                                                                                                                                                                                                                                                                                                                                                                                                                                                                                                                                                                                                                                                                                                                                                                                                                                                                                                                                                                                                                                                                                                                                                                                                                                                                                                                                                                                                                                                                                                                                                                                                                                                                                                                                                                                                                                                                                                                                                                                                                                                                                                                                                                                                                                                                                                                                                                                                                                                                                                                                                                                                                                                                                                                                                                                                                                                                                                                                                                                                                                                                                                                                                                                                                                                                                                                                                                                                                                                                                                                                                                                                                                                                                                                                                                                                                                                                                                                                                                                                                                                                                                                                                                                                                                                                                                                                                                                                                                                                                                                                                                                                                                                                                                                                                                                                                                                                                                                                                                                                                                                                                                                                                                                                                                                                                                                                                                                                                                                                                                                                                                                                                                                                                                                                                                                                                                                                                                                                                                                                                                                                                                                                                                                                                                                                                                                                                                                                                                                                                                                                                                                                                                                                                                                                                                                                                                                                                                                                                                                                                                                                                                                                                                                                                                                                                                                                                                                                                                                                                                                                                                                                                                                                                                                                                                                                                                                                                                                                                                                                                                                                                                                                                                                                                                                                                                                                                                                                                                                                                                                                                                                                                                                                                                                                                                                                                                                                                                                                                                                                                                                                                                                                                                                                                                                                                                                                                                                                                                                                                                                                                                                                                                                                                                                                                                                                                                                                                                                                                                                                                                                                                                                                                                                                                                                                                                                                                                                                                                                                                                                                                                                                                                                                                                                                                                                                                                                                                                                                                                                                                                                                                                                                                                                                                                                                                                                                                                                                                                                                                                                                                                                                                                                                                                                                                                                                                                                                                                                                                                                                                                                                                                                                                                                                                                                                                                                                                                                                                                                                                                                                                                                                                                                                                                                                                                                                                                                                                                                        | Chemische und Veterinäruntersuchungsamt Múnterland-Emscher-Lippe (CVUA-MEL)                                                          | Robert Koch Institute                                                                                                                                                                        |                                                                                                                                                                                                                                                                                                                                                                                                                                                                                                                                                                                                                                                                                                     |
| EPI_ISL_9523299                                                                                                                                                                                                                                                                                                                                                                                                                                                                                                                                                                                                                                                                                                                                                                                                                                                                                                                                                                                                                                                                                                                                                                                                                                                                                                                                                                                                                                                                                                                                                                                                                                                                                                                                                                                                                                                                                                                                                                                                                                                                                                                                                                                                                                                                                                                                                                                                                                                                                                                                                                                                                                                                                                                                                                                                                                                                                                                                                                                                                                                                                                                                                                                                                                                                                                                                                                                                                                                                                                                                                                                                                                                                                                                                                                                                                                                                                                                                                                                                                                                                                                                                                                                                                                                                                                                                                                                                                                                                                                                                                                                                                                                                                                                                                                                                                                                                                                                                                                                                                                                                                                                                                                                                                                                                                                                                                                                                                                                                                                                                                                                                                                                                                                                                                                                                                                                                                                                                                                                                                                                                                                                                                                                                                                                                                                                                                                                                                                                                                                                                                                                                                                                                                                                                                                                                                                                                                                                                                                                                                                                                                                                                                                                                                                                                                                                                                                                                                                                                                                                                                                                                                                                                                                                                                                                                                                                                                                                                                                                                                                                                                                                                                                                                                                                                                                                                                                                                                                                                                                                                                                                                                                                                                                                                                                                                                                                                                                                                                                                                                                                                                                                                                                                                                                                                                                                                                                                                                                                                                                                                                                                                                                                                                                                                                                                                                                                                                                                                                                                                                                                                                                                                                                                                                                                                                                                                                                                                                                                                                                                                                                                                                                                                                                                                                                                                                                                                                                                                                                                                                                                                                                                                                                                                                                                                                                                                                                                                                                                                                                                                                                                                                                                                                                                                                                                                                                                                                                                                                                                                                                                                                                                                                                                                                                                                                                                                                                                                                                                                                                                                                                                                                                                                                                                                                                                                                                                                                                                                                                                                                                                                                                                                                                                                                                                                                                                                                                                                                                                                                                                                                                                                                                                                                                                                         | City of Milwaukee Health Department Laboratory                                                                                       | City of Milwaukee Health Department Laboratory                                                                                                                                               | Amy Bauer; Manjeet Khubbar; Nandhakumar Balkrishnan; Sanjib Bhattacharyya                                                                                                                                                                                                                                                                                                                                                                                                                                                                                                                                                                                                                           |
| EPI_ISL_9224136, EPI_ISL_9224137, EPI_ISL_9224152, EPI_ISL_9224153, EPI_ISL_9224154, EPI_ISL_9224155, EPI_ISL_9224156, EPI_ISL_9224157, EPI_ISL_9224158, EPI_ISL_9224159, EPI_ISL_9224160, EPI_ISL_9224161, EPI_ISL_9224162, EPI_ISL_9224163, EPI_ISL_9224164, EPI_ISL_9224165, EPI_ISL_9224166, EPI_ISL_9224167, EPI_ISL_9224168, EPI_ISL_9224169, EPI_ISL_9224170, EPI_ISL_9224171, EPI_ISL_9224172, EPI_ISL_9224173, EPI_ISL_9224174, EPI_ISL_9224175, EPI_ISL_9224176, EPI_ISL_9224177, EPI_ISL_9224178, EPI_ISL_9224179, EPI_ISL_9224180, EPI_ISL_9224181, EPI_ISL_9224182, EPI_ISL_9224183, EPI_ISL_9224184, EPI_ISL_9224185, EPI_ISL_9224186, EPI_ISL_9224187, EPI_ISL_9224188, EPI_ISL_9224189, EPI_ISL_9224190, EPI_ISL_9224191, EPI_ISL_9224192, EPI_ISL_9224193, EPI_ISL_9224194, EPI_ISL_9224195, EPI_ISL_9224196, EPI_ISL_9224197, EPI_ISL_9224198, EPI_ISL_9224199, EPI_ISL_9224200, EPI_ISL_9224201, EPI_ISL_9224202, EPI_ISL_9224203, EPI_ISL_9224204, EPI_ISL_9224205, EPI_ISL_9224206, EPI_ISL_9224207, EPI_ISL_9224208, EPI_ISL_9224209, EPI_ISL_9224210, EPI_ISL_9224211, EPI_ISL_9224212, EPI_ISL_9224213, EPI_ISL_9224214, EPI_ISL_9224215, EPI_ISL_9224216, EPI_ISL_9224217, EPI_ISL_9224218, EPI_ISL_9224219, EPI_ISL_9224220, EPI_ISL_9224221, EPI_ISL_9224222, EPI_ISL_9224223, EPI_ISL_9224224, EPI_ISL_9224225, EPI_ISL_9224226, EPI_ISL_9224227, EPI_ISL_9224228, EPI_ISL_9224229, EPI_ISL_9224230, EPI_ISL_9224231, EPI_ISL_9224232, EPI_ISL_9224233, EPI_ISL_9224234, EPI_ISL_9224235, EPI_ISL_9224236, EPI_ISL_9224237, EPI_ISL_9224238, EPI_ISL_9224239, EPI_ISL_9224240, EPI_ISL_9224241, EPI_ISL_9224242, EPI_ISL_9224243, EPI_ISL_9224244, EPI_ISL_9224245, EPI_ISL_9224246, EPI_ISL_9224247, EPI_ISL_9224248, EPI_ISL_9224249, EPI_ISL_9224250, EPI_ISL_9224251, EPI_ISL_9224252, EPI_ISL_9224253, EPI_ISL_9224254, EPI_ISL_9224255, EPI_ISL_9224256, EPI_ISL_9224257, EPI_ISL_9224258, EPI_ISL_9224259, EPI_ISL_9224260, EPI_ISL_9224261, EPI_ISL_9224262, EPI_ISL_9224263, EPI_ISL_9224264, EPI_ISL_9224265, EPI_ISL_9224266, EPI_ISL_9224267, EPI_ISL_9224268, EPI_ISL_9224269, EPI_ISL_9224270, EPI_ISL_9224271, EPI_ISL_9224272, EPI_ISL_9224273, EPI_ISL_9224274, EPI_ISL_9224275, EPI_ISL_9224276, EPI_ISL_9224277, EPI_ISL_9224278, EPI_ISL_9224279, EPI_ISL_9224280, EPI_ISL_9224281, EPI_ISL_9224282, EPI_ISL_9224283, EPI_ISL_9224284, EPI_ISL_9224285, EPI_ISL_9224286, EPI_ISL_9224287, EPI_ISL_9224288, EPI_ISL_9224289, EPI_ISL_9224290, EPI_ISL_9224291, EPI_ISL_9224292, EPI_ISL_9224293, EPI_ISL_9224294, EPI_ISL_9224295, EPI_ISL_9224296, EPI_ISL_9224297, EPI_ISL_9224298, EPI_ISL_9224299, EPI_ISL_9224300, EPI_ISL_9224301, EPI_ISL_9224302, EPI_ISL_9224303, EPI_ISL_9224304, EPI_ISL_9224305, EPI_ISL_9224306, EPI_ISL_9224307, EPI_ISL_9224308, EPI_ISL_9224309, EPI_ISL_9224310, EPI_ISL_9224311, EPI_ISL_9224312, EPI_ISL_9224313, EPI_ISL_9224314, EPI_ISL_9224315, EPI_ISL_9224316, EPI_ISL_9224317, EPI_ISL_9224318, EPI_ISL_9224319, EPI_ISL_9224320, EPI_ISL_9224321, EPI_ISL_9224322, EPI_ISL_9224323, EPI_ISL_9224324, EPI_ISL_9224325, EPI_ISL_9224326, EPI_ISL_9224327, EPI_ISL_9224328, EPI_ISL_9224329, EPI_ISL_9224330, EPI_ISL_9224331, EPI_ISL_9224332, EPI_ISL_9224333, EPI_ISL_9224334, EPI_ISL_9224335, EPI_ISL_9224336, EPI_ISL_9224337, EPI_ISL_9224338, EPI_ISL_9224339, EPI_ISL_9224340, EPI_ISL_9224341, EPI_ISL_9224342, EPI_ISL_9224343, EPI_ISL_9224344, EPI_ISL_9224345, EPI_ISL_9224346, EPI_ISL_9224347, EPI_ISL_9224348, EPI_ISL_9224349, EPI_ISL_9224350, EPI_ISL_9224351, EPI_ISL_9224352, EPI_ISL_9224353, EPI_ISL_9224354, EPI_ISL_9224355, EPI_ISL_9224356, EPI_ISL_9224357, EPI_ISL_9224358, EPI_ISL_9224359, EPI_ISL_9224360, EPI_ISL_9224361, EPI_ISL_9224362, EPI_ISL_9224363, EPI_ISL_9224364, EPI_ISL_9224365, EPI_ISL_9224366, EPI_ISL_9224367, EPI_ISL_9224368, EPI_ISL_9224369, EPI_ISL_9224370, EPI_ISL_9224371, EPI_ISL_9224372, EPI_ISL_9224373, EPI_ISL_9224374, EPI_ISL_9224375, EPI_ISL_9224376, EPI_ISL_9224377, EPI_ISL_9224378, EPI_ISL_9224379, EPI_ISL_9224380, EPI_ISL_9224381, EPI_ISL_9224382, EPI_ISL_9224383, EPI_ISL_9224384, EPI_ISL_9224385, EPI_ISL_9224386, EPI_ISL_9224387, EPI_ISL_9224388, EPI_ISL_9224389, EPI_ISL_9224390, EPI_ISL_9224391, EPI_ISL_9224392, EPI_ISL_9224393, EPI_ISL_9224394, EPI_ISL_9224395, EPI_ISL_9224396, EPI_ISL_9224397, EPI_ISL_9224398, EPI_ISL_9224399, EPI_ISL_9224400, EPI_ISL_9224401, EPI_ISL_9224402, EPI_ISL_9224403, EPI_ISL_9224404, EPI_ISL_9224405, EPI_ISL_9224406, EPI_ISL_9224407, EPI_ISL_9224408, EPI_ISL_9224409, EPI_ISL_9224410, EPI_ISL_9224411, EPI_ISL_9224412, EPI_ISL_9224413, EPI_ISL_9224414, EPI_ISL_9224415, EPI_ISL_9224416, EPI_ISL_9224417, EPI_ISL_9224418, EPI_ISL_9224419, EPI_ISL_9224420, EPI_ISL_9224421, EPI_ISL_9224422, EPI_ISL_9224423, EPI_ISL_9224424, EPI_ISL_9224425, EPI_ISL_9224426, EPI_ISL_9224427, EPI_ISL_9224428, EPI_ISL_9224429, EPI_ISL_9224430, EPI_ISL_9224431, EPI_ISL_9224432, EPI_ISL_9224433, EPI_ISL_9224434, EPI_ISL_9224435, EPI_ISL_9224436, EPI_ISL_9224437, EPI_ISL_9224438, EPI_ISL_9224439, EPI_ISL_9224440, EPI_ISL_9224441, EPI_ISL_9224442, EPI_ISL_9224443, EPI_ISL_9224444, EPI_ISL_9224445, EPI_ISL_9224446, EPI_ISL_9224447, EPI_ISL_9224448, EPI_ISL_9224449, EPI_ISL_9224450, EPI_ISL_9224451, EPI_ISL_9224452, EPI_ISL_9224453, EPI_ISL_9224454, EPI_ISL_9224455, EPI_ISL_9224456, EPI_ISL_9224457, EPI_ISL_9224458, EPI_ISL_9224459, EPI_ISL_9224460, EPI_ISL_9224461, EPI_ISL_9224462, EPI_ISL_9224463, EPI_ISL_9224464, EPI_ISL_9224465, EPI_ISL_9224466, EPI_ISL_9224467, EPI_ISL_9224468, EPI_ISL_9224469, EPI_ISL_9224470, EPI_ISL_9224471, EPI_ISL_9224472, EPI_ISL_9224473, EPI_ISL_9224474, EPI_ISL_9224475, EPI_ISL_9224476, EPI_ISL_9224477, EPI_ISL_9224478, EPI_ISL_9224479, EPI_ISL_9224480, EPI_ISL_9224481, EPI_ISL_9224482, EPI_ISL_9224483, EPI_ISL_9224484, EPI_ISL_9224485, EPI_ISL_9224486, EPI_ISL_9224487, EPI_ISL_9224488, EPI_ISL_9224489, EPI_ISL_9224490, EPI_ISL_9224491, EPI_ISL_9224492, EPI_ISL_9224493, EPI_ISL_9224494, EPI_ISL_9224495, EPI_ISL_9224496, EPI_ISL_9224497, EPI_ISL_9224498, EPI_ISL_9224499, EPI_ISL_9224500, EPI_ISL_9224501, EPI_ISL_9224502, EPI_ISL_9224503, EPI_ISL_9224504, EPI_ISL_9224505, EPI_ISL_9224506, EPI_ISL_9224507, EPI_ISL_9224508, EPI_ISL_9224509, EPI_ISL_9224510, EPI_ISL_9224511, EPI_ISL_9224512, EPI_ISL_9224513, EPI_ISL_9224514, EPI_ISL_9224515, EPI_ISL_9224516, EPI_ISL_9224517, EPI_ISL_9224518, EPI_ISL_9224519, EPI_ISL_9224520, EPI_ISL_9224521, EPI_ISL_9224522, EPI_ISL_9224523, EPI_ISL_9224524, EPI_ISL_9224525, EPI_ISL_9224526, EPI_ISL_9224527, EPI_ISL_9224528, EPI_ISL_9224529, EPI_ISL_9224530, EPI_ISL_9224531, EPI_ISL_9224532, EPI_ISL_9224533, EPI_ISL_9224534, EPI_ISL_9224535, EPI_ISL_9224536, EPI_ISL_9224537, EPI_ISL_9224538, EPI_ISL_9224539, EPI_ISL_9224540, EPI_ISL_9224541, EPI_ISL_9224542, EPI_ISL_9224543, EPI_ISL_9224544, EPI_ISL_9224545, EPI_ISL_9224546, EPI_ISL_9224547, EPI_ISL_9224548, EPI_ISL_9224549, EPI_ISL_9224550, EPI_ISL_9224551, EPI_ISL_9224552, EPI_ISL_9224553, EPI_ISL_9224554, EPI_ISL_9224555, EPI_ISL_9224556, EPI_ISL_9224557, EPI_ISL_9224558, EPI_ISL_9224559, EPI_ISL_9224560, EPI_ISL_9224561, EPI_ISL_9224562, EPI_ISL_9224563, EPI_ISL_9224564, EPI_ISL_9224565, EPI_ISL_9224566, EPI_ISL_9224567, EPI_ISL_9224568, EPI_ISL_9224569, EPI_ISL_9224570, EPI_ISL_9224571, EPI_ISL_9224572, EPI_ISL_9224573, EPI_ISL_9224574, EPI_ISL_9224575, EPI_ISL_9224576, EPI_ISL_9224577, EPI_ISL_9224578, EPI_ISL_9224579, EPI_ISL_9224580, EPI_ISL_9224581, EPI_ISL_9224582, EPI_ISL_9224583, EPI_ISL_9224584, EPI_ISL_9224585, EPI_ISL_9224586, EPI_ISL_9224587, EPI_ISL_9224588, EPI_ISL_9224589, EPI_ISL_9224590, EPI_ISL_9224591, EPI_ISL_9224592, EPI_ISL_9224593, EPI_ISL_9224594, EPI_ISL_9224595, EPI_ISL_9224596, EPI_ISL_9224597, EPI_ISL_9224598, EPI_ISL_9224599, EPI_ISL_9224600, EPI_ISL_9224601, EPI_ISL_9224602, EPI_ISL_9224603, EPI_ISL_9224604, EPI_ISL_9224605, EPI_ISL_9224606, EPI_ISL_9224607, EPI_ISL_9224608, EPI_ISL_9224609, EPI_ISL_9224610, EPI_ISL_9224611, EPI_ISL_9224612, EPI_ISL_9224613, EPI_ISL_9224614, EPI_ISL_9224615, EPI_ISL_9224616, EPI_ISL_9224617, EPI_ISL_9224618, EPI_ISL_9224619, EPI_ISL_9224620, EPI_ISL_9224621, EPI_ISL_9224622, EPI_ISL_9224623, EPI_ISL_9224624, EPI_ISL_9224625, EPI_ISL_9224626, EPI_ISL_9224627, EPI_ISL_9224628, EPI_ISL_9224629, EPI_ISL_9224630, EPI_ISL_9224631, EPI_ISL_9224632, EPI_ISL_9224633, EPI_ISL_9224634, EPI_ISL_9224635, EPI_ISL_9224636, EPI_ISL_9224637, EPI_ISL_9224638, EPI_ISL_9224639, EPI_ISL_9224640, EPI_ISL_9224641, EPI_ISL_9224642, EPI_ISL_9224643, EPI_ISL_9224644, EPI_ISL_9224645, EPI_ISL_9224646, EPI_ISL_9224647, EPI_ISL_9224648, EPI_ISL_9224649, EPI_ISL_9224650, EPI_ISL_9224651, EPI_ISL_9224652, EPI_ISL_9224653, EPI_ISL_9224654, EPI_ISL_9224655, EPI_ISL_9224656, EPI_ISL_9224657, EPI_ISL_9224658, EPI_ISL_9224659, EPI_ISL_9224660, EPI_ISL_9224661, EPI_ISL_9224662, EPI_ISL_9224663, EPI_ISL_9224664, EPI_ISL_9224665, EPI_ISL_9224666, EPI_ISL_9224667, EPI_ISL_9224668, EPI_ISL_9224669, EPI_ISL_9224670, EPI_ISL_9224671, EPI_ISL_9224672, EPI_ISL_9224673, EPI_ISL_9224674, EPI_ISL_9224675, EPI_ISL_9224676, EPI_ISL_9224677, EPI_ISL_9224678, EPI_ISL_9224679, EPI_ISL_9224680, EPI_ISL_9224681, EPI_ISL_9224682, EPI_ISL_9224683, EPI_ISL_9224684, EPI_ISL_9224685, EPI_ISL_9224686, EPI_ISL_9224687, EPI_ISL_9224688, EPI_ISL_9224689, EPI_ISL_9224690, EPI_ISL_9224691, EPI_ISL_9224692, EPI_ISL_9224693, EPI_ISL_9224694, EPI_ISL_9224695, EPI_ISL_9224696, EPI_ISL_9224697, EPI_ISL_9224698, EPI_ISL_9224699, EPI_ISL_9224700, EPI_ISL_9224701, EPI_ISL_9224702, EPI_ISL_9224703, EPI_ISL_9224704, EPI_ISL_9224705, EPI_ISL_9224706, EPI_ISL_9224707, EPI_ISL_9224708, EPI_ISL_9224709, EPI_ISL_9224710, EPI_ISL_9224711, EPI_ISL_9224712, EPI_ISL_9224713, EPI_ISL_9224714, EPI_ISL_9224715, EPI_ISL_9224716, EPI_ISL_9224717, EPI_ISL_9224718, EPI_ISL_9224719, EPI_ISL_9224720, EPI_ISL_9224721, EPI_ISL_9224722, EPI_ISL_9224723, EPI_ISL_9224724, EPI_ISL_9224725, EPI_ISL_9224726, EPI_ISL_9224727, EPI_ISL_9224728, EPI_ISL_9224729, EPI_ISL_9224730, EPI_ISL_9224731, EPI_ISL_9224732, EPI_ISL_9224733, EPI_ISL_9224734, EPI_ISL_9224735, EPI_ISL_9224736, EPI_ISL_9224737, EPI_ISL_9224738, EPI_ISL_9224739, EPI_ISL_9224740, EPI_ISL_9224741, EPI_ISL_9224742, EPI_ISL_9224743, EPI_ISL_9224744, EPI_ISL_9224745, EPI_ISL_9224746, EPI_ISL_9224747, EPI_ISL_9224748, EPI_ISL_9224749, EPI_ISL_9224750, EPI_ISL_9224751, EPI_ISL_9224752, EPI_ISL_9224753, EPI_ISL_9224754, EPI_ISL_9224755, EPI_ISL_9224756, EPI_ISL_9224757, EPI_ISL_9224758, EPI_ISL_9224759, EPI_ISL_9224760, EPI_ISL_9224761, EPI_ISL_9224762, EPI_ISL_9224763, EPI_ISL_9224764, EPI_ISL_9224765, EPI_ISL_9224766, EPI_ISL_9224767, EPI_ISL_9224768, EPI_ISL_9224769, EPI_ISL_9224770, EPI_ISL_9224771, EPI_ISL_9224772, EPI_ISL_9224773, EPI_ISL_9224774, EPI_ISL_9224775, EPI_ISL_9224776, EPI_ISL_9224777, EPI_ISL_9224778, EPI_ISL_9224779, EPI_ISL_9224780, EPI_ISL_9224781, EPI_ISL_9224782, EPI_ISL_9224783, EPI_ISL_9224784, EPI_ISL_9224785, EPI_ISL_9224786, EPI_ISL_9224787, EPI_ISL_9224788, EPI_ISL_9224789, EPI_ISL_9224790, EPI_ISL_9224791, EPI_ISL_9224792, EPI_ISL_9224793, EPI_ISL_9224794, EPI_ISL_9224795, EPI_ISL_9224796, EPI_ISL_9224797, EPI_ISL_9224798, EPI_ISL_9224799, EPI_ISL_9224800, EPI_ISL_9224801, EPI_ISL_9224802, EPI_ISL_9224803, EPI_ISL_9224804, EPI_ISL_9224805, EPI_ISL_9224806, EPI_ISL_9224807, EPI_ISL_9224808, EPI_ISL_9224809, EPI_ISL_9224810, EPI_ISL_9224811, EPI_ISL_9224812, EPI_ISL_9224813, EPI_ISL_9224814, EPI_ISL_9224815, EPI_ISL_9224816, EPI_ISL_9224817, EPI_ISL_9224818, EPI_ISL_9224819, EPI_ISL_9224820, EPI_ISL_9224821, EPI_ISL_9224822, EPI_ISL_9224823, EPI_ISL_9224824, EPI_ISL_9224825, EPI_ISL_9224826, EPI_ISL_9224827, EPI_ISL_9224828, EPI_ISL_9224829, EPI_ISL_9224830, EPI_ISL_9224831, EPI_ISL_9224832, EPI_ISL_9224833, EPI_ISL_9224834, EPI_ISL_9224835, EPI_ISL_9224836, EPI_ISL_9224837, EPI_ISL_9224838, EPI_ISL_9224839, EPI_ISL_9224840, EPI_ISL_9224841, EPI_ISL_9224842, EPI_ISL_9224843, EPI_ISL_9224844, EPI_ISL_9224845, EPI_ISL_9224846, EPI_ISL_9224847, EPI_ISL_9224848, EPI_ISL_9224849, EPI_ISL_9224850, EPI_ISL_9224851, EPI_ISL_9224852, EPI_ISL_9224853, EPI_ISL_9224854, EPI_ISL_9224855, EPI_ISL_9224856, EPI_ISL_9224857, EPI_ISL_9224858, EPI_ISL_9224859, EPI_ISL_9224860, EPI_ISL_9224861, EPI_ISL_9224862, EPI_ISL_9224863, EPI_ISL_9224864, EPI_ISL_9224865, EPI_ISL_9224866, EPI_ISL_9224867, EPI_ISL_9224868, EPI_ISL_9224869, EPI_ISL_9224870, EPI_ISL_9224871, EPI_ISL_9224872, EPI_ISL_9224873, EPI_ISL_9224874, EPI_ISL_9224875, EPI_ISL_9224876, EPI_ISL_9224877, EPI_ISL_9224878, EPI_ISL_9224879, EPI_ISL_9224880, EPI_ISL_9224881, EPI_ISL_9224882, EPI_ISL_9224883, EPI_ISL_9224884, EPI_ISL_9224885, EPI_ISL_9224886, EPI_ISL_9224887, EPI_ISL_9224888, EPI_ISL_9224889, EPI_ISL_9224890, EPI_ISL_9224891, EPI_ISL_9224892, EPI_ISL_9224893, EPI_ISL_9224894, EPI_ISL_9224895, EPI_ISL_9224896, EPI_ISL_9224897, EPI_ISL_9224898, EPI_ISL_9224899, EPI_ISL_9224900, EPI_ISL_9224901, EPI_ISL_9224902, EPI_ISL_9224903, EPI_ISL_9224904, EPI_ISL_9224905, EPI_ISL_9224906, EPI_ISL_9224907, EPI_ISL_9224908, EPI_ISL_9224909, EPI_ISL_9224910, EPI_ISL_9224911, EPI_ISL_9224912, EPI_ISL_9224913, EPI_ISL_9224914, EPI_ISL_9224915, EPI_ISL_9224916, EPI_ISL_9224917, EPI_ISL_9224918, EPI_ISL_9224919, EPI_ISL_9224920, EPI_ISL_9224921, EPI_ISL_9224922, EPI_ISL_9224923, EPI_ISL_9224924, EPI_ISL_9224925, EPI_ISL_9224926 |                                                                                                                                      |                                                                                                                                                                                              |                                                                                                                                                                                                                                                                                                                                                                                                                                                                                                                                                                                                                                                                                                     |





| Serum Institut, Copenhagen, Denmark                                                                                                                                                                                                                                                                                                                                                                                                                                                                                                                                                                                                                                                                                                                                                                                                                                                                                                                                                                                                                                                                                                                                                                                                                                                                                                                                                                                                                                                                                                                                                                                                                                                                                                                                                                                                                                                                                                                                                                                                                                                                                                                                                                                                                                                                                                                                                                                                                                                                          |                                                                                                                       | Genomics                                                                                                                                                                                                           |                                                                                                                                                                                                                                                                                                                                                                                                                 |
|--------------------------------------------------------------------------------------------------------------------------------------------------------------------------------------------------------------------------------------------------------------------------------------------------------------------------------------------------------------------------------------------------------------------------------------------------------------------------------------------------------------------------------------------------------------------------------------------------------------------------------------------------------------------------------------------------------------------------------------------------------------------------------------------------------------------------------------------------------------------------------------------------------------------------------------------------------------------------------------------------------------------------------------------------------------------------------------------------------------------------------------------------------------------------------------------------------------------------------------------------------------------------------------------------------------------------------------------------------------------------------------------------------------------------------------------------------------------------------------------------------------------------------------------------------------------------------------------------------------------------------------------------------------------------------------------------------------------------------------------------------------------------------------------------------------------------------------------------------------------------------------------------------------------------------------------------------------------------------------------------------------------------------------------------------------------------------------------------------------------------------------------------------------------------------------------------------------------------------------------------------------------------------------------------------------------------------------------------------------------------------------------------------------------------------------------------------------------------------------------------------------|-----------------------------------------------------------------------------------------------------------------------|--------------------------------------------------------------------------------------------------------------------------------------------------------------------------------------------------------------------|-----------------------------------------------------------------------------------------------------------------------------------------------------------------------------------------------------------------------------------------------------------------------------------------------------------------------------------------------------------------------------------------------------------------|
| EPI_ISL_9782476, EPI_ISL_9782729, EPI_ISL_9783177, EPI_ISL_9783622, EPI_ISL_9784116, EPI_ISL_9785117, EPI_ISL_9785317, EPI_ISL_9785427, EPI_ISL_9786833, EPI_ISL_9787849, EPI_ISL_9788419, EPI_ISL_9789437                                                                                                                                                                                                                                                                                                                                                                                                                                                                                                                                                                                                                                                                                                                                                                                                                                                                                                                                                                                                                                                                                                                                                                                                                                                                                                                                                                                                                                                                                                                                                                                                                                                                                                                                                                                                                                                                                                                                                                                                                                                                                                                                                                                                                                                                                                   | Department of Clinical Microbiology and Center for Genomic Medicine, Rigshospitalet, Copenhagen, Denmark              | Statens Serum Institut Bioinformatics and Microbial Genomics                                                                                                                                                       | Danish Covid-19 Genome Consortium                                                                                                                                                                                                                                                                                                                                                                               |
| see above                                                                                                                                                                                                                                                                                                                                                                                                                                                                                                                                                                                                                                                                                                                                                                                                                                                                                                                                                                                                                                                                                                                                                                                                                                                                                                                                                                                                                                                                                                                                                                                                                                                                                                                                                                                                                                                                                                                                                                                                                                                                                                                                                                                                                                                                                                                                                                                                                                                                                                    |                                                                                                                       |                                                                                                                                                                                                                    |                                                                                                                                                                                                                                                                                                                                                                                                                 |
| EPI_ISL_9119851, EPI_ISL_9119958, EPI_ISL_9120623, EPI_ISL_9121101, EPI_ISL_9121519, EPI_ISL_9122027, EPI_ISL_9122080, EPI_ISL_9122102, EPI_ISL_9123409, EPI_ISL_9124048, EPI_ISL_9124065, EPI_ISL_9124568, EPI_ISL_9124658, EPI_ISL_9124731, EPI_ISL_9127773, EPI_ISL_9131509, EPI_ISL_9134245, EPI_ISL_9268829, EPI_ISL_9268880, EPI_ISL_9268924, EPI_ISL_9268958, EPI_ISL_9268992, EPI_ISL_9269153, EPI_ISL_9269351, EPI_ISL_9269429, EPI_ISL_9269838, EPI_ISL_9269850, EPI_ISL_9269868, EPI_ISL_9269886, EPI_ISL_9269896, EPI_ISL_9269920, EPI_ISL_9269972, EPI_ISL_9270562, EPI_ISL_9270372, EPI_ISL_9270412, EPI_ISL_9270414, EPI_ISL_9270715, EPI_ISL_9270760, EPI_ISL_9270780, EPI_ISL_9270809, EPI_ISL_9270819, EPI_ISL_9270929, EPI_ISL_9270953, EPI_ISL_9270992, EPI_ISL_9271152, EPI_ISL_9271283, EPI_ISL_9271416, EPI_ISL_9271486, EPI_ISL_9271486, EPI_ISL_9271486, EPI_ISL_9358549, EPI_ISL_9358806, EPI_ISL_9359032, EPI_ISL_9359119, EPI_ISL_9359138, EPI_ISL_9359175, EPI_ISL_9359227, EPI_ISL_9359804, EPI_ISL_9359831, EPI_ISL_9359832, EPI_ISL_9359902, EPI_ISL_9359931, EPI_ISL_9360232, EPI_ISL_9360407, EPI_ISL_9361099, EPI_ISL_9362038, EPI_ISL_9363915, EPI_ISL_9364486, EPI_ISL_9365209, EPI_ISL_9365592, EPI_ISL_9365700, EPI_ISL_9365894, EPI_ISL_9366079, EPI_ISL_9367615, EPI_ISL_9367817, EPI_ISL_9367958, EPI_ISL_9408737, EPI_ISL_9409274, EPI_ISL_9410152, EPI_ISL_9410180, EPI_ISL_9411093, EPI_ISL_9411628                                                                                                                                                                                                                                                                                                                                                                                                                                                                                                                                                                                                                                                                                                                                                                                                                                                                                                                                                                                                                                                             | Department of Clinical Microbiology, Odense University Hospital, Odense, Denmark                                      | Statens Serum Institut Bioinformatics and Microbial Genomics                                                                                                                                                       | Danish Covid-19 Genome Consortium                                                                                                                                                                                                                                                                                                                                                                               |
| see above                                                                                                                                                                                                                                                                                                                                                                                                                                                                                                                                                                                                                                                                                                                                                                                                                                                                                                                                                                                                                                                                                                                                                                                                                                                                                                                                                                                                                                                                                                                                                                                                                                                                                                                                                                                                                                                                                                                                                                                                                                                                                                                                                                                                                                                                                                                                                                                                                                                                                                    |                                                                                                                       |                                                                                                                                                                                                                    |                                                                                                                                                                                                                                                                                                                                                                                                                 |
| EPI_ISL_9325666                                                                                                                                                                                                                                                                                                                                                                                                                                                                                                                                                                                                                                                                                                                                                                                                                                                                                                                                                                                                                                                                                                                                                                                                                                                                                                                                                                                                                                                                                                                                                                                                                                                                                                                                                                                                                                                                                                                                                                                                                                                                                                                                                                                                                                                                                                                                                                                                                                                                                              | Department of Microbiology, University Hospital in Pilsen                                                             | Department of Microbiology, University Hospital in Pilsen                                                                                                                                                          | Jaroslav Hrabak; Katerina Chudejova; Katerina Vilkova; Petra Kocova; Vendula Heringova                                                                                                                                                                                                                                                                                                                          |
| EPI_ISL_9224449, EPI_ISL_9224458, EPI_ISL_9224459, EPI_ISL_9318010, EPI_ISL_9318014, EPI_ISL_9614460                                                                                                                                                                                                                                                                                                                                                                                                                                                                                                                                                                                                                                                                                                                                                                                                                                                                                                                                                                                                                                                                                                                                                                                                                                                                                                                                                                                                                                                                                                                                                                                                                                                                                                                                                                                                                                                                                                                                                                                                                                                                                                                                                                                                                                                                                                                                                                                                         | Dept. of Microbiology and Infection Control, Akershus University Hospital HF                                          | Dept. of Microbiology and Infection Control, Akershus University Hospital HF                                                                                                                                       | Alexander Hesselberg Løvestad; Hanne Berggreen; Hege Vangstein Aamot                                                                                                                                                                                                                                                                                                                                            |
| EPI_ISL_9751072                                                                                                                                                                                                                                                                                                                                                                                                                                                                                                                                                                                                                                                                                                                                                                                                                                                                                                                                                                                                                                                                                                                                                                                                                                                                                                                                                                                                                                                                                                                                                                                                                                                                                                                                                                                                                                                                                                                                                                                                                                                                                                                                                                                                                                                                                                                                                                                                                                                                                              | Dia-Gon MP s.r.o. Cheb                                                                                                | Department of Microbiology, University Hospital in Pilsen                                                                                                                                                          | Jaroslav Hrabak; Katerina Chudejova; Katerina Vilkova; Petra Kocova; Vendula Heringova                                                                                                                                                                                                                                                                                                                          |
| EPI_ISL_9534172                                                                                                                                                                                                                                                                                                                                                                                                                                                                                                                                                                                                                                                                                                                                                                                                                                                                                                                                                                                                                                                                                                                                                                                                                                                                                                                                                                                                                                                                                                                                                                                                                                                                                                                                                                                                                                                                                                                                                                                                                                                                                                                                                                                                                                                                                                                                                                                                                                                                                              | Diagnostyka Sp. z o.o. Szczecin                                                                                       | 1. Tricity SARS-CoV-2 sequencing consortium: University of Gdansk, Medical University of Gdansk, Vaxican Ltd., Invicta Ltd. 2. National Institute of Public Health - National Institute of Hygiene, Warsaw, Poland | Celina Cybulska; Karolina Gackowska; Katarzyna Groth; Katarzyna Zacharczuk; Krystyna Bienkowska Szewczyk; Lukasz Rabalski; Maciej Grzybek; Maciej Kosinski; Magdalena Nowakowska; Marcin Lubocki; Małgorzata Sadkowska-Todys; Tomasz Woikowicz                                                                                                                                                                  |
| EPI_ISL_9376218, EPI_ISL_9569887, EPI_ISL_9569904, EPI_ISL_9569905, EPI_ISL_9569906                                                                                                                                                                                                                                                                                                                                                                                                                                                                                                                                                                                                                                                                                                                                                                                                                                                                                                                                                                                                                                                                                                                                                                                                                                                                                                                                                                                                                                                                                                                                                                                                                                                                                                                                                                                                                                                                                                                                                                                                                                                                                                                                                                                                                                                                                                                                                                                                                          | Diagnostyka Sp. z o.o. Gdańsk                                                                                         | 1. Tricity SARS-CoV-2 sequencing consortium: University of Gdansk, Medical University of Gdansk, Vaxican Ltd., Invicta Ltd. 2. National Institute of Public Health - National Institute of Hygiene, Warsaw, Poland | Celina Cybulska; Karolina Gackowska; Katarzyna Groth; Katarzyna Zacharczuk; Krystyna Bienkowska Szewczyk; Lukasz Rabalski; Maciej Grzybek; Maciej Kosinski; Magdalena Nowakowska; Marcin Lubocki; Małgorzata Sadkowska-Todys; Tomasz Woikowicz                                                                                                                                                                  |
| EPI_ISL_9699623                                                                                                                                                                                                                                                                                                                                                                                                                                                                                                                                                                                                                                                                                                                                                                                                                                                                                                                                                                                                                                                                                                                                                                                                                                                                                                                                                                                                                                                                                                                                                                                                                                                                                                                                                                                                                                                                                                                                                                                                                                                                                                                                                                                                                                                                                                                                                                                                                                                                                              | Diagnostyka. Laboratoria Medyczne.                                                                                    | 1. ViroGenetics - BSL3 Laboratory of Virology, Malopolska Centre of Biotechnology, Jagiellonian University; 2. Diagtron Laboratoria Lukasz Rabalski                                                                | Gromowski, T.; Kowalski, M.; Labaj; Maciej Kosinski; Mazur-Panasiuk, N.; P.P.; Kyr, C.; Rabalski L.; Rogalska-Kupiec M.; Swadzba J.; Sylwia Januszczak; Szulc, P.; Wydmski, W.                                                                                                                                                                                                                                  |
| EPI_ISL_9779498                                                                                                                                                                                                                                                                                                                                                                                                                                                                                                                                                                                                                                                                                                                                                                                                                                                                                                                                                                                                                                                                                                                                                                                                                                                                                                                                                                                                                                                                                                                                                                                                                                                                                                                                                                                                                                                                                                                                                                                                                                                                                                                                                                                                                                                                                                                                                                                                                                                                                              | District Hospital                                                                                                     | Centre for DNA Fingerprinting and Diagnostics                                                                                                                                                                      | Arunkumar Karunanidhi; Ashwin Dalal; Asmita Gupta; Divya Vashista; Murali Bashyam; Nagamani Kammili; Rupin Shelake; Vinay Donipadi                                                                                                                                                                                                                                                                              |
| EPI_ISL_9413809, EPI_ISL_9712067, EPI_ISL_9712070, EPI_ISL_9712071, EPI_ISL_9712072, EPI_ISL_9712073, EPI_ISL_9712074, EPI_ISL_9712078                                                                                                                                                                                                                                                                                                                                                                                                                                                                                                                                                                                                                                                                                                                                                                                                                                                                                                                                                                                                                                                                                                                                                                                                                                                                                                                                                                                                                                                                                                                                                                                                                                                                                                                                                                                                                                                                                                                                                                                                                                                                                                                                                                                                                                                                                                                                                                       | Division of Medical Virology, National Health Laboratory Service (NHLS), Tygerberg Hospital / Stellenbosch University | Division of Medical Virology, National Health Laboratory Service (NHLS), Tygerberg Hospital / Stellenbosch University                                                                                              | Gert van Zyl; Jean Maritz; Mathilda Claassen; Nadine Cronje; Petra Raimond; Shannon Wilson; Susan Engelbrecht; Tania Stander; Tongai Maponga; Wolfgang Preiser                                                                                                                                                                                                                                                  |
| see above                                                                                                                                                                                                                                                                                                                                                                                                                                                                                                                                                                                                                                                                                                                                                                                                                                                                                                                                                                                                                                                                                                                                                                                                                                                                                                                                                                                                                                                                                                                                                                                                                                                                                                                                                                                                                                                                                                                                                                                                                                                                                                                                                                                                                                                                                                                                                                                                                                                                                                    |                                                                                                                       |                                                                                                                                                                                                                    |                                                                                                                                                                                                                                                                                                                                                                                                                 |
| EPI_ISL_9499196                                                                                                                                                                                                                                                                                                                                                                                                                                                                                                                                                                                                                                                                                                                                                                                                                                                                                                                                                                                                                                                                                                                                                                                                                                                                                                                                                                                                                                                                                                                                                                                                                                                                                                                                                                                                                                                                                                                                                                                                                                                                                                                                                                                                                                                                                                                                                                                                                                                                                              | Douglass Hanly Moir Pathology                                                                                         | NSW Health Pathology - Institute of Clinical Pathology and Medical Research; Westmead Hospital; University of Sydney                                                                                               | Arnott A.; Draper J.; Gall M.; Martinez E.; Rockett R.; Sintchenco V.; on behalf of ICPMR                                                                                                                                                                                                                                                                                                                       |
| EPI_ISL_9528245, EPI_ISL_9528268, EPI_ISL_9528291                                                                                                                                                                                                                                                                                                                                                                                                                                                                                                                                                                                                                                                                                                                                                                                                                                                                                                                                                                                                                                                                                                                                                                                                                                                                                                                                                                                                                                                                                                                                                                                                                                                                                                                                                                                                                                                                                                                                                                                                                                                                                                                                                                                                                                                                                                                                                                                                                                                            | Dutch COVID-19 response team                                                                                          | Erasmus Medical Center                                                                                                                                                                                             | Anne van der Linden; Anнемiek van der Eijk; Bas Oude Munnik; Corine GeurtsvanKessel; David Nieuwenhuijse; Emmanuelle Munger; Irina Chestakova; Marion Koopmans; Marjan Boter; Reina Sikkema; Richard Molenkamp; on behalf of the Dutch national COVID-19 response team.                                                                                                                                         |
| EPI_ISL_9751663                                                                                                                                                                                                                                                                                                                                                                                                                                                                                                                                                                                                                                                                                                                                                                                                                                                                                                                                                                                                                                                                                                                                                                                                                                                                                                                                                                                                                                                                                                                                                                                                                                                                                                                                                                                                                                                                                                                                                                                                                                                                                                                                                                                                                                                                                                                                                                                                                                                                                              | Dutch COVID-19 response team                                                                                          | Medical Microbiology, Maastricht University Medical Centre                                                                                                                                                         | Brian van der Veer*; Carmen Reumkens; Christian Hoebe; Erik Beuken; Jozef Dingemans*; Lieke van Alphen; Paul Savelkoul                                                                                                                                                                                                                                                                                          |
| EPI_ISL_9530262, EPI_ISL_9530327, EPI_ISL_9530331, EPI_ISL_9530541, EPI_ISL_9530552, EPI_ISL_9530560, EPI_ISL_9530864, EPI_ISL_9530907, EPI_ISL_9530963, EPI_ISL_9531067, EPI_ISL_9531068, EPI_ISL_9531071, EPI_ISL_9531117, EPI_ISL_9531333, EPI_ISL_9531556, EPI_ISL_9531658, EPI_ISL_9776011, EPI_ISL_9776083, EPI_ISL_9776087, EPI_ISL_9776226, EPI_ISL_9776252, EPI_ISL_9776304, EPI_ISL_9776390, EPI_ISL_9776579, EPI_ISL_9776607, EPI_ISL_9776609, EPI_ISL_9776638                                                                                                                                                                                                                                                                                                                                                                                                                                                                                                                                                                                                                                                                                                                                                                                                                                                                                                                                                                                                                                                                                                                                                                                                                                                                                                                                                                                                                                                                                                                                                                                                                                                                                                                                                                                                                                                                                                                                                                                                                                    | Dutch COVID-19 response team                                                                                          | National Institute for Public Health and the Environment (RIVM)                                                                                                                                                    | Adam Meijer; Afke Vogelzang; AnneMarie van den Brandt; Annelies Kroneman; Bas van der Veer; Chantal Reusken; Dennis Schmitz; Dirk Egkink; Florian Zwagemaker; Harry Vennema; Ivo van Walle; Jeroen Cremer; Jil Kocken; Jordy de Bakker; Karim Hajji; Kim Frenkis; Linda van Someren; Lisa Wijsman; Lynn Aarts; Rynne Jaarsma; Sanne Bos; Sharon van den Brink; on behalf of the national COVID-19 response team |
| see above                                                                                                                                                                                                                                                                                                                                                                                                                                                                                                                                                                                                                                                                                                                                                                                                                                                                                                                                                                                                                                                                                                                                                                                                                                                                                                                                                                                                                                                                                                                                                                                                                                                                                                                                                                                                                                                                                                                                                                                                                                                                                                                                                                                                                                                                                                                                                                                                                                                                                                    |                                                                                                                       |                                                                                                                                                                                                                    |                                                                                                                                                                                                                                                                                                                                                                                                                 |
| EPI_ISL_9501562, EPI_ISL_9501563, EPI_ISL_9501576, EPI_ISL_9501890, EPI_ISL_9800714, EPI_ISL_9800723, EPI_ISL_9800900, EPI_ISL_9800901, EPI_ISL_9800909, EPI_ISL_9800910, EPI_ISL_9800911, EPI_ISL_9800912, EPI_ISL_9800913, EPI_ISL_9800914, EPI_ISL_9800915, EPI_ISL_9800916, EPI_ISL_9800917, EPI_ISL_9800918, EPI_ISL_9800919, EPI_ISL_9800920, EPI_ISL_9800921, EPI_ISL_9800922, EPI_ISL_9800923, EPI_ISL_9800924, EPI_ISL_9800925, EPI_ISL_9800926, EPI_ISL_9800927, EPI_ISL_9800928, EPI_ISL_9800929, EPI_ISL_9800930, EPI_ISL_9800931, EPI_ISL_9800932, EPI_ISL_9800933, EPI_ISL_9800934, EPI_ISL_9800935, EPI_ISL_9800936, EPI_ISL_9800937, EPI_ISL_9800938, EPI_ISL_9800939, EPI_ISL_9800940, EPI_ISL_9800941, EPI_ISL_9800942, EPI_ISL_9800943, EPI_ISL_9800944, EPI_ISL_9800945, EPI_ISL_9800946, EPI_ISL_9800947, EPI_ISL_9800948, EPI_ISL_9800949, EPI_ISL_9800950, EPI_ISL_9800951, EPI_ISL_9800952, EPI_ISL_9800953, EPI_ISL_9800954, EPI_ISL_9800955, EPI_ISL_9800956, EPI_ISL_9800957, EPI_ISL_9800958, EPI_ISL_9800959, EPI_ISL_9800960, EPI_ISL_9800961, EPI_ISL_9800962, EPI_ISL_9800963, EPI_ISL_9800964, EPI_ISL_9800965, EPI_ISL_9800966, EPI_ISL_9800967, EPI_ISL_9800968, EPI_ISL_9800969, EPI_ISL_9800970, EPI_ISL_9800971, EPI_ISL_9800972, EPI_ISL_9800973, EPI_ISL_9800974, EPI_ISL_9800975, EPI_ISL_9800976, EPI_ISL_9800977, EPI_ISL_9800978, EPI_ISL_9800979, EPI_ISL_9800980, EPI_ISL_9800981, EPI_ISL_9800982, EPI_ISL_9800983, EPI_ISL_9800984, EPI_ISL_9800985, EPI_ISL_9800986, EPI_ISL_9800987, EPI_ISL_9800988, EPI_ISL_9800989, EPI_ISL_9800990, EPI_ISL_9800991, EPI_ISL_9800992, EPI_ISL_9800993, EPI_ISL_9800994, EPI_ISL_9800995, EPI_ISL_9800996, EPI_ISL_9800997, EPI_ISL_9800998, EPI_ISL_9800999, EPI_ISL_9801000, EPI_ISL_9801001, EPI_ISL_9801002, EPI_ISL_9801003, EPI_ISL_9801004, EPI_ISL_9801005, EPI_ISL_9801006, EPI_ISL_9801007, EPI_ISL_9801008, EPI_ISL_9801009, EPI_ISL_9801010, EPI_ISL_9801011, EPI_ISL_9801012, EPI_ISL_9801013, EPI_ISL_9801014, EPI_ISL_9801015, EPI_ISL_9801016, EPI_ISL_9801017, EPI_ISL_9801018, EPI_ISL_9801019, EPI_ISL_9801020, EPI_ISL_9801021, EPI_ISL_9801022, EPI_ISL_9801023, EPI_ISL_9801024, EPI_ISL_9801025, EPI_ISL_9801026, EPI_ISL_9801027, EPI_ISL_9801028, EPI_ISL_9801029, EPI_ISL_9801030, EPI_ISL_9801031, EPI_ISL_9801032, EPI_ISL_9801033, EPI_ISL_9801034, EPI_ISL_9801035, EPI_ISL_9801036, EPI_ISL_9801037, EPI_ISL_9801038, EPI_ISL_9801039, EPI_ISL_9801040, EPI_ISL_9801041, EPI_ISL_9801042 | Edmonton Provincial Lab                                                                                               | Alberta Precision Labs (APL)                                                                                                                                                                                       | Buss; Croxen M; Deo A; Dieu P; E; Ferrato C; Gill K; Koleva P; Li V; Lloyd C; Lynch T; Ma R; Murphy S; Pabbaraju K; Shideler S.; Shokoples S; Skitsko T; Thayer J; Tipples G; Wong A; Yu C; Zelyas N                                                                                                                                                                                                            |
| see above                                                                                                                                                                                                                                                                                                                                                                                                                                                                                                                                                                                                                                                                                                                                                                                                                                                                                                                                                                                                                                                                                                                                                                                                                                                                                                                                                                                                                                                                                                                                                                                                                                                                                                                                                                                                                                                                                                                                                                                                                                                                                                                                                                                                                                                                                                                                                                                                                                                                                                    |                                                                                                                       |                                                                                                                                                                                                                    |                                                                                                                                                                                                                                                                                                                                                                                                                 |
| EPI_ISL_9553983, EPI_ISL_9553985, EPI_ISL_9553995, EPI_ISL_9553996, EPI_ISL_9553999, EPI_ISL_9554162, EPI_ISL_9554249, EPI_ISL_9554340, EPI_ISL_9554369                                                                                                                                                                                                                                                                                                                                                                                                                                                                                                                                                                                                                                                                                                                                                                                                                                                                                                                                                                                                                                                                                                                                                                                                                                                                                                                                                                                                                                                                                                                                                                                                                                                                                                                                                                                                                                                                                                                                                                                                                                                                                                                                                                                                                                                                                                                                                      | Enfer                                                                                                                 | Enfer                                                                                                                                                                                                              | Elaine M. Kenny; Suzie Coughlan                                                                                                                                                                                                                                                                                                                                                                                 |
| see above                                                                                                                                                                                                                                                                                                                                                                                                                                                                                                                                                                                                                                                                                                                                                                                                                                                                                                                                                                                                                                                                                                                                                                                                                                                                                                                                                                                                                                                                                                                                                                                                                                                                                                                                                                                                                                                                                                                                                                                                                                                                                                                                                                                                                                                                                                                                                                                                                                                                                                    |                                                                                                                       |                                                                                                                                                                                                                    |                                                                                                                                                                                                                                                                                                                                                                                                                 |
| EPI_ISL_9650811                                                                                                                                                                                                                                                                                                                                                                                                                                                                                                                                                                                                                                                                                                                                                                                                                                                                                                                                                                                                                                                                                                                                                                                                                                                                                                                                                                                                                                                                                                                                                                                                                                                                                                                                                                                                                                                                                                                                                                                                                                                                                                                                                                                                                                                                                                                                                                                                                                                                                              | Faculty Hospital Bulovka, Department of Clinical Microbiology                                                         | Charles University, Faculty of Science, BIOCEV, OMICS Genomics                                                                                                                                                     | Alžběta Bučková; Blanka Hamplová; Ingrid Poláková; Jiří Novák; Nela Vláčáriková; Ruth Tachezy; Sebastian Cristian Treitli; Vladimír Hampl; Zoltán Fűssy; Štěpánka Hrdá                                                                                                                                                                                                                                          |
| EPI_ISL_9337629, EPI_ISL_9337639, EPI_ISL_9338370, EPI_ISL_9381803, EPI_ISL_9382097, EPI_ISL_9426366, EPI_ISL_9426514, EPI_ISL_9426851, EPI_ISL_9426873, EPI_ISL_9426907, EPI_ISL_9426989, EPI_ISL_9427749, EPI_ISL_9427753, EPI_ISL_9427754, EPI_ISL_9428028, EPI_ISL_9428462, EPI_ISL_9428528, EPI_ISL_9428529, EPI_ISL_9578202, EPI_ISL_9578225, EPI_ISL_9578362, EPI_ISL_9578364                                                                                                                                                                                                                                                                                                                                                                                                                                                                                                                                                                                                                                                                                                                                                                                                                                                                                                                                                                                                                                                                                                                                                                                                                                                                                                                                                                                                                                                                                                                                                                                                                                                                                                                                                                                                                                                                                                                                                                                                                                                                                                                         | Fulgent Genetics                                                                                                      | Centers for Disease Control and Prevention Division of Viral Diseases, Pathogen Discovery                                                                                                                          | Becky Tsai; Benafsh Sapra; Benjamin Rambo-Martin; Christopher Gulwick; Clinton Paden; Dakota Howard; Dhwan Batra; Doreen Ng; Duncan MacCannell; Erlisa Sula; Harry Gao; James Caravas; John Gao; Joseph Fierro; Kristine Lacek; Matthew Schmerer; Mickey Li; Peter Cook; Scott Sammons; Shatavia Morrison; Tymecia Kendall; Victoria Caba Figueroa; Yan Meng; Yvette Unoarumhi                                  |
| see above                                                                                                                                                                                                                                                                                                                                                                                                                                                                                                                                                                                                                                                                                                                                                                                                                                                                                                                                                                                                                                                                                                                                                                                                                                                                                                                                                                                                                                                                                                                                                                                                                                                                                                                                                                                                                                                                                                                                                                                                                                                                                                                                                                                                                                                                                                                                                                                                                                                                                                    |                                                                                                                       |                                                                                                                                                                                                                    |                                                                                                                                                                                                                                                                                                                                                                                                                 |
| EPI_ISL_9747190                                                                                                                                                                                                                                                                                                                                                                                                                                                                                                                                                                                                                                                                                                                                                                                                                                                                                                                                                                                                                                                                                                                                                                                                                                                                                                                                                                                                                                                                                                                                                                                                                                                                                                                                                                                                                                                                                                                                                                                                                                                                                                                                                                                                                                                                                                                                                                                                                                                                                              | Furst Medical Laboratory                                                                                              | Norwegian Institute of Public Health, Department of Virology                                                                                                                                                       | Atiya R Ali; Debec Nadia; Engebretsen Serina Beate; Garcia Llorente Ignacio; Hilde Elishaug; Hilde Nordby Falkenhuug; Hilde Vollan; Jon Bråte; Kamilla Heddeland Instefjord; Karoline Bragstad; Kathrine Stene-Johansen; Line Victoria Moen; Marie Paulsen Madsen; Olav Hungnes; Pedersen Benedikte Nevjen; Rasmus Riis Kopperud                                                                                |
| EPI_ISL_9340728, EPI_ISL_9357153, EPI_ISL_9357168, EPI_ISL_9357216, EPI_ISL_9357219, EPI_ISL_9357239, EPI_ISL_9357269, EPI_ISL_9357332, EPI_ISL_9357378, EPI_ISL_9357379, EPI_ISL_9357386, EPI_ISL_9518287, EPI_ISL_9518433                                                                                                                                                                                                                                                                                                                                                                                                                                                                                                                                                                                                                                                                                                                                                                                                                                                                                                                                                                                                                                                                                                                                                                                                                                                                                                                                                                                                                                                                                                                                                                                                                                                                                                                                                                                                                                                                                                                                                                                                                                                                                                                                                                                                                                                                                  | GH A.CHENEVIER-H.MONDDOR                                                                                              | Department of Virology, Henri Mondor University Hospital, Assistance Publique Hôpitaux de Paris, Université Paris-Est Créteil, INSERM U955                                                                         | Alexandre Soulier; Christophe Rodriguez; Elisabeth Trawinski; Guillaume Gricourt; Jean-Michel Pawlowsky; Melissa N'Debi; Slim Fourati; Vanessa Demontant                                                                                                                                                                                                                                                        |
| see above                                                                                                                                                                                                                                                                                                                                                                                                                                                                                                                                                                                                                                                                                                                                                                                                                                                                                                                                                                                                                                                                                                                                                                                                                                                                                                                                                                                                                                                                                                                                                                                                                                                                                                                                                                                                                                                                                                                                                                                                                                                                                                                                                                                                                                                                                                                                                                                                                                                                                                    |                                                                                                                       |                                                                                                                                                                                                                    |                                                                                                                                                                                                                                                                                                                                                                                                                 |
| EPI_ISL_9604379                                                                                                                                                                                                                                                                                                                                                                                                                                                                                                                                                                                                                                                                                                                                                                                                                                                                                                                                                                                                                                                                                                                                                                                                                                                                                                                                                                                                                                                                                                                                                                                                                                                                                                                                                                                                                                                                                                                                                                                                                                                                                                                                                                                                                                                                                                                                                                                                                                                                                              | GMERS Medical College and Hospital, Sola, Ahmedabad                                                                   | Gujarat Biotechnology Research Centre                                                                                                                                                                              | Akhilesh Modi; Apurvasinh Puvar; Bhadreshsinh Gohil; Chaitanya Joshi; Disha Vora; Janvi Raval; Jaykumar Rangani; Madhvi Joshi; Nimesh Patel; Nitin Savaliya; NitinShukla; Parul Patel; Priyank Chavda; Ramesh Pandit; Roshani Mishra; Sonal Sharma; Tasnim Trivedi; Zarna Patel                                                                                                                                 |
| EPI_ISL_9612692, EPI_ISL_9612693, EPI_ISL_9612695                                                                                                                                                                                                                                                                                                                                                                                                                                                                                                                                                                                                                                                                                                                                                                                                                                                                                                                                                                                                                                                                                                                                                                                                                                                                                                                                                                                                                                                                                                                                                                                                                                                                                                                                                                                                                                                                                                                                                                                                                                                                                                                                                                                                                                                                                                                                                                                                                                                            | GMERS Medical College, Gandhinagar                                                                                    | Gujarat Biotechnology Research Centre                                                                                                                                                                              | Akhilesh Modi; Apurvasinh Puvar; Bhadreshsinh Gohil; Chaitanya Joshi; Disha Vora; Gaurishankar Shrimali; Janvi Raval; Jaykumar Rangani; Madhvi Joshi; Nimesh Patel; Nitin Savaliya; NitinShukla; Priyank Chavda; Ramesh Pandit; Roshani Mishra; Sonal Sharma; Tasnim Trivedi; Zarna Patel                                                                                                                       |
| EPI_ISL_9533282, EPI_ISL_9533285, EPI_ISL_9533287, EPI_ISL_9533308, EPI_ISL_9533329, EPI_ISL_9533342, EPI_ISL_9533343, EPI_ISL_9533354, EPI_ISL_9533355, EPI_ISL_9533356, EPI_ISL_9533358, EPI_ISL_9533359, EPI_ISL_9533366, EPI_ISL_9533371, EPI_ISL_9533374, EPI_ISL_9533380, EPI_ISL_9533381, EPI_ISL_9533383, EPI_ISL_9533395, EPI_ISL_9533396, EPI_ISL_9533398, EPI_ISL_9533400, EPI_ISL_9533402, EPI_ISL_9533411, EPI_ISL_9533419, EPI_ISL_9533423, EPI_ISL_9533426, EPI_ISL_9533428, EPI_ISL_9533430, EPI_ISL_9533434, EPI_ISL_9533436, EPI_ISL_9533437, EPI_ISL_9533443                                                                                                                                                                                                                                                                                                                                                                                                                                                                                                                                                                                                                                                                                                                                                                                                                                                                                                                                                                                                                                                                                                                                                                                                                                                                                                                                                                                                                                                                                                                                                                                                                                                                                                                                                                                                                                                                                                                              | Gandhi Medical College and Hospital (GMCH), Secunderabad                                                              | NIV Influenza                                                                                                                                                                                                      | D.R.Manisha Rani; Dr.G.Sushma Rajya Lakshmi; Dr.K.Nagamani; Dr.Sunitha PakaIapaty                                                                                                                                                                                                                                                                                                                               |
| see above                                                                                                                                                                                                                                                                                                                                                                                                                                                                                                                                                                                                                                                                                                                                                                                                                                                                                                                                                                                                                                                                                                                                                                                                                                                                                                                                                                                                                                                                                                                                                                                                                                                                                                                                                                                                                                                                                                                                                                                                                                                                                                                                                                                                                                                                                                                                                                                                                                                                                                    |                                                                                                                       |                                                                                                                                                                                                                    |                                                                                                                                                                                                                                                                                                                                                                                                                 |
| EPI_ISL_9673518                                                                                                                                                                                                                                                                                                                                                                                                                                                                                                                                                                                                                                                                                                                                                                                                                                                                                                                                                                                                                                                                                                                                                                                                                                                                                                                                                                                                                                                                                                                                                                                                                                                                                                                                                                                                                                                                                                                                                                                                                                                                                                                                                                                                                                                                                                                                                                                                                                                                                              | GeneMe Labs, ul. Potokowa 10A, 80-283 Gdańsk                                                                          | 1. Tricity SARS-CoV-2 sequencing consortium: University of Gdansk, Medical University of Gdansk, Vaxican Ltd., Invicta Ltd. 2. National Institute of Public Health - National Institute of Hygiene, Warsaw, Poland | Celina Cybulska; Karolina Gackowska; Katarzyna Groth; Katarzyna Zacharczuk; Krystyna Bienkowska Szewczyk; Lukasz Rabalski; Maciej Grzybek; Maciej Kosinski; Magdalena Nowakowska; Marcin Lubocki; Małgorzata Sadkowska-Todys; Tomasz Woikowicz                                                                                                                                                                  |
| EPI_ISL_9604373, EPI_ISL_9696284, EPI_ISL_9696285                                                                                                                                                                                                                                                                                                                                                                                                                                                                                                                                                                                                                                                                                                                                                                                                                                                                                                                                                                                                                                                                                                                                                                                                                                                                                                                                                                                                                                                                                                                                                                                                                                                                                                                                                                                                                                                                                                                                                                                                                                                                                                                                                                                                                                                                                                                                                                                                                                                            | Genexplore Diagnostic center, Ahmedabad                                                                               | Gujarat Biotechnology Research Centre                                                                                                                                                                              | Akhilesh Modi; Apurvasinh Puvar; Ashish Patel; Bhadreshsinh Gohil; Chaitanya Joshi; Disha Vora; Janvi Raval; Jaykumar Rangani; Madhvi Joshi; Nimesh Patel; Nitin Savaliya; NitinShukla; Priyank Chavda; Ramesh Pandit; Roshani Mishra; Sonal Sharma; Tasnim Trivedi; Zarna Patel                                                                                                                                |
| EPI_ISL_9376217                                                                                                                                                                                                                                                                                                                                                                                                                                                                                                                                                                                                                                                                                                                                                                                                                                                                                                                                                                                                                                                                                                                                                                                                                                                                                                                                                                                                                                                                                                                                                                                                                                                                                                                                                                                                                                                                                                                                                                                                                                                                                                                                                                                                                                                                                                                                                                                                                                                                                              | Genloxa Sp. z o.o.                                                                                                    | 1. Tricity SARS-CoV-2 sequencing consortium: University of Gdansk, Medical University of Gdansk, Vaxican Ltd., Invicta Ltd. 2. National Institute of Public Health - National Institute of Hygiene, Warsaw, Poland | Celina Cybulska; Karolina Gackowska; Katarzyna Groth; Katarzyna Zacharczuk; Krystyna Bienkowska Szewczyk; Lukasz Rabalski; Maciej Grzybek; Maciej Kosinski; Magdalena Nowakowska; Marcin Lubocki; Małgorzata Sadkowska-Todys; Tomasz Woikowicz                                                                                                                                                                  |
| EPI_ISL_9612689, EPI_ISL_9775258                                                                                                                                                                                                                                                                                                                                                                                                                                                                                                                                                                                                                                                                                                                                                                                                                                                                                                                                                                                                                                                                                                                                                                                                                                                                                                                                                                                                                                                                                                                                                                                                                                                                                                                                                                                                                                                                                                                                                                                                                                                                                                                                                                                                                                                                                                                                                                                                                                                                             | Government Medical College, Bhavnagar                                                                                 | Gujarat Biotechnology Research Centre                                                                                                                                                                              | Akhilesh Modi; Apurvasinh Puvar; Bhadreshsinh Gohil; Chaitanya Joshi; Disha Vora; Janvi Raval; Jaykumar Rangani; Kairavi Desai; Madhvi Joshi; Nimesh Patel; Nitin Savaliya; NitinShukla; Priyank Chavda; Ramesh Pandit; Roshani Mishra; Sonal Sharma; Tasnim Trivedi; Zarna Patel                                                                                                                               |
| EPI_ISL_9236174, EPI_ISL_9612700, EPI_ISL_9612701, EPI_ISL_9612703, EPI_ISL_9612704, EPI_ISL_9612708, EPI_ISL_9612709, EPI_ISL_9696304                                                                                                                                                                                                                                                                                                                                                                                                                                                                                                                                                                                                                                                                                                                                                                                                                                                                                                                                                                                                                                                                                                                                                                                                                                                                                                                                                                                                                                                                                                                                                                                                                                                                                                                                                                                                                                                                                                                                                                                                                                                                                                                                                                                                                                                                                                                                                                       |                                                                                                                       |                                                                                                                                                                                                                    |                                                                                                                                                                                                                                                                                                                                                                                                                 |



|                                                                                                                                                                                                                                                                                                                  |                                                                                                 |                                                                                                                                                                                                                      |                                                                                                                                                                                                                                                                                                                                                                              |
|------------------------------------------------------------------------------------------------------------------------------------------------------------------------------------------------------------------------------------------------------------------------------------------------------------------|-------------------------------------------------------------------------------------------------|----------------------------------------------------------------------------------------------------------------------------------------------------------------------------------------------------------------------|------------------------------------------------------------------------------------------------------------------------------------------------------------------------------------------------------------------------------------------------------------------------------------------------------------------------------------------------------------------------------|
| see above                                                                                                                                                                                                                                                                                                        | Government Medical College, Surat                                                               | Gujarat Biotechnology Research Centre                                                                                                                                                                                | Akhilesh Modi; Apurvasinh Puvar; Bhadreshsinh Gohil; Chaitanya Joshi; Disha Vora; Janvi Raval; Jaykumar Rangani; Madhvi Joshi; Netta Khandelwal; Nimesh Patel; Nitin Savaliya; NitinShukla; Priyank Chavda; Ramesh Pandit; Roshani Mishra; Sonal Sharma; Tasnim Trivedi; Zarna Patel                                                                                         |
| EPI_ISL_9612698                                                                                                                                                                                                                                                                                                  | Gujarat Adani Institute of Medical Sciences, Bhuj, Gujarat                                      | Gujarat Biotechnology Research Centre                                                                                                                                                                                | Akhilesh Modi; Apurvasinh Puvar; Bhadreshsinh Gohil; Chaitanya Joshi; Disha Vora; Hitesh; Janvi Raval; Jaykumar Rangani; Madhvi Joshi; Nimesh Patel; Nitin Savaliya; NitinShukla; Priyank Chavda; Ramesh Pandit; Roshani Mishra; Sonal Sharma; Tasnim Trivedi; Zarna Patel                                                                                                   |
| EPI_ISL_9415816, EPI_ISL_9415817, EPI_ISL_9415827, EPI_ISL_9415830, EPI_ISL_9415833, EPI_ISL_9415834                                                                                                                                                                                                             | HOSPITAL UNIVERSITARI DE BELLVITGE                                                              | Microbiology Department                                                                                                                                                                                              | Aida Gonzalez-Diaz; Antonio Gonzalo; Carmen Ardanuy; Daniel Rodriguez; Jordi Camara; Jordi Niubi; Laura Calatayud; M Angeles Dominguez; Sara Marti; Veronica Saez; Yolanda Hernandez                                                                                                                                                                                         |
| EPI_ISL_9698478, EPI_ISL_9698482                                                                                                                                                                                                                                                                                 | Hannover Medical School, Institute of Virology                                                  | Hannover Medical School, Institute of Virology                                                                                                                                                                       | Lars Steinbrück                                                                                                                                                                                                                                                                                                                                                              |
| EPI_ISL_9290142, EPI_ISL_9290146, EPI_ISL_9290149, EPI_ISL_9290178, EPI_ISL_9290339, EPI_ISL_9290369, EPI_ISL_9290462, EPI_ISL_9290472, EPI_ISL_9290477, EPI_ISL_9290501, EPI_ISL_9290513, EPI_ISL_9290557, EPI_ISL_9290588, EPI_ISL_9309964, EPI_ISL_9310067, EPI_ISL_9310109, EPI_ISL_9310113, EPI_ISL_9310122 | see above                                                                                       | Health Services Laboratories                                                                                                                                                                                         | Wellcome Sanger Institute for the COVID-19 Genomics UK (COG-UK) Consortium<br>Cordelia Langford; David K. Jackson; Dominic Kwiatkowski; Ewan Harrison; Health Services Laboratories and Alex Alderton; Ian Johnston; Jeffrey Barrett; John Sillitoe on behalf of the Wellcome Sanger Institute COVID-19 Surveillance Team; Roberto Amato; Sonia Goncalves                    |
| EPI_ISL_9577208, EPI_ISL_9577311, EPI_ISL_9577318                                                                                                                                                                                                                                                                | Helix                                                                                           | Centers for Disease Control and Prevention Division of Viral Diseases, Pathogen Discovery                                                                                                                            | Benjamin Rambo-Martin; Christopher Gulvick; Clinton Paden; Dakota Howard; Dhvani Batra; Duncan MacCannell; Erisa Sula; Helix CA; Jason Caravas; Kristine Lacek; Matthew Schmerer; Peter Cook; Scott Sammons; Shatavia Morrison; Tymeckia Kendall; Victoria Caban Figueroa; Yvette Unoarumhi                                                                                  |
| EPI_ISL_9616695, EPI_ISL_9616697, EPI_ISL_9616698                                                                                                                                                                                                                                                                | Hospital Center Luxembourg                                                                      | Laboratoire national de sante, Microbiology, Microbial Genomics Platform                                                                                                                                             | Anke Wienecke-Baldacchino; Catherine Ragimbeau; Elodie Solarino; Fatu Djabi; Jean-Hugues Francois; Jessica Tapp; Lise Pignon; Michel Kohnen; Raoul Salmon; Tamir Abdelrahman; Virginie Jover; sibel Berger                                                                                                                                                                   |
| EPI_ISL_9176784, EPI_ISL_9176785                                                                                                                                                                                                                                                                                 | Hospital General Universitario Gregorio Marañón                                                 | Hospital General Universitario Gregorio Marañón                                                                                                                                                                      | Cristina Rodriguez-Grande; Dario Garcia de Viedma; Jorge Rodriguez-Grande; Julia Suárez; Laura Pérez-Lago; Marta Herranz Martin; Patricia Muñoz; Pedro Sola Campoy; Pilar Catalán; Rosalía Palomino Cabrera; Sergio Buenestado Serrano                                                                                                                                       |
| EPI_ISL_9604402                                                                                                                                                                                                                                                                                                  | Hospital Universitari Dr. Josep Trueta                                                          | Institut d'Investigació Biomèdica de Girona   Hospital Universitari Dr. Josep Trueta                                                                                                                                 | Bernat del Olmo; Mel·lina Pinsach; Meritxell Deulofeu; Nuria Esther Neto; Paula Costa                                                                                                                                                                                                                                                                                        |
| EPI_ISL_9497669, EPI_ISL_9497670, EPI_ISL_9497671                                                                                                                                                                                                                                                                | Hrvatski zavod za javno zdravstvo                                                               | Hrvatski zavod za javno zdravstvo                                                                                                                                                                                    | Anita Jurić; Dragan Jurić; Irena Tabain; Ivana Ferenčak; Josipa Kuzle                                                                                                                                                                                                                                                                                                        |
| EPI_ISL_9419534, EPI_ISL_9494982, EPI_ISL_9494992, EPI_ISL_9494993, EPI_ISL_9494994                                                                                                                                                                                                                              | ICMR-National Institute of Virology - INSTACOG                                                  | NIV Influenza                                                                                                                                                                                                        | Dr. Varsha Potdar and NIC Team                                                                                                                                                                                                                                                                                                                                               |
| EPI_ISL_9742068, EPI_ISL_9742199, EPI_ISL_9742207, EPI_ISL_9742552, EPI_ISL_9742631, EPI_ISL_9742759                                                                                                                                                                                                             | IMD - MVZ Labor Martinsried                                                                     | Robert Koch Institute                                                                                                                                                                                                |                                                                                                                                                                                                                                                                                                                                                                              |
| EPI_ISL_9718553, EPI_ISL_9718562, EPI_ISL_9718582, EPI_ISL_9718584, EPI_ISL_9718590, EPI_ISL_9718596, EPI_ISL_9718627, EPI_ISL_9718633                                                                                                                                                                           | see above                                                                                       | IMD Labor Frankfurt                                                                                                                                                                                                  | Robert Koch Institute                                                                                                                                                                                                                                                                                                                                                        |
| EPI_ISL_9322029, EPI_ISL_9601262, EPI_ISL_9601263, EPI_ISL_9795682                                                                                                                                                                                                                                               | INSTITUT BERGONIE                                                                               | CNR Virus des Infections Respiratoires - France SUD                                                                                                                                                                  | Antonin Bal; Bruno Lina; Bruno Simon; Gregory Destras; Gwendolyne Burfin; Hadrien Regue; Laurence Josset; Martine Valette; Quentin Semanas; Théophile Boyer; Théophile Boyer                                                                                                                                                                                                 |
| EPI_ISL_9604297, EPI_ISL_9604381, EPI_ISL_9618118                                                                                                                                                                                                                                                                | In Vitro Speciality Laboratory, Ahmedabad                                                       | Gujarat Biotechnology Research Centre                                                                                                                                                                                | Akhilesh Modi; Apurvasinh Puvar; Bhadreshsinh Gohil; Chaitanya Joshi; Disha Vora; Janvi Raval; Jaykumar Rangani; Madhvi Joshi; Mala; Naresh Laddha; Nimesh Patel; Nitin Savaliya; NitinShukla; Priyank Chavda; Ramesh Pandit; Roshani Mishra; Sonal Sharma; Tasnim Trivedi; Zarna Patel                                                                                      |
| EPI_ISL_9738907, EPI_ISL_9738909, EPI_ISL_9738918, EPI_ISL_9738920, EPI_ISL_9738921                                                                                                                                                                                                                              | Indira Gandhi Memorial Hospital                                                                 | Indira Gandhi Memorial Hospital                                                                                                                                                                                      | D. Fathmath Nazla Rafeeq; Dr. Ibrahim Afzal; Mr. Ibrahim Nishan Ahmed; Ms. Aishath Shuhudha; Ms. Aminath Shazleena Abdul Rahman; Ms. Soafy Mohamed                                                                                                                                                                                                                           |
| EPI_ISL_9667116, EPI_ISL_9667140, EPI_ISL_9667143                                                                                                                                                                                                                                                                | Infinity Biologix                                                                               | Centers for Disease Control and Prevention Division of Viral Diseases, Pathogen Discovery                                                                                                                            | Benjamin Rambo-Martin; Chirayu Goswami; Christian Bixby; Christopher Gulvick; Clinton Paden; Dakota Howard; Dhvani Batra; Duncan MacCannell; Erisa Sula; Jason Caravas; Jonathan Schultz; Kristine Lacek; Matthew Schmerer; Peter Cook; Robin Grimwood; Russ Hager; Scott Sammons; Shatavia Morrison; Tymeckia Kendall; Victoria Caban Figueroa; Yihe Wang; Yvette Unoarumhi |
| EPI_ISL_9454892, EPI_ISL_9454906, EPI_ISL_9454909, EPI_ISL_9454918, EPI_ISL_9454921, EPI_ISL_9454926                                                                                                                                                                                                             | Institut für Labormedizin Mikrobiologie und Hygiene                                             | Robert Koch Institute                                                                                                                                                                                                |                                                                                                                                                                                                                                                                                                                                                                              |
| EPI_ISL_9742924, EPI_ISL_9742939                                                                                                                                                                                                                                                                                 | Institut für med. Mikrobiologie u. Virologie Klinikum Oldenburg                                 | Robert Koch Institute                                                                                                                                                                                                |                                                                                                                                                                                                                                                                                                                                                                              |
| EPI_ISL_9206100                                                                                                                                                                                                                                                                                                  | Institute of Virology, Biomedical Research Center of the Slovak Academy of Sciences, Bratislava | Faculty of Mathematics, Physics and Informatics, Comenius University, Bratislava                                                                                                                                     | Boris Klempa; Brona Brejova; Jozef Nosek; Juraj Kopacek; Kristina Borsova; Lubomira Lukacikova; Martina Lickova; Martina Nebohacova; Monika Slavikova; Sabina Fumacova Havlikova; Tomas Vinar; Veronika Vanova; Viktoria Cabanova                                                                                                                                            |
| EPI_ISL_9324146                                                                                                                                                                                                                                                                                                  | Institute of Virology, Medical Center, University of Freiburg, Freiburg, Germany                | Institute of Virology, Clinical Virus Genomics, Medical Center, University of Freiburg, Freiburg, Germany                                                                                                            | Jonas Fuchs; Lena Jaki; Lisa Gutbrod; Marcus Panning                                                                                                                                                                                                                                                                                                                         |
| EPI_ISL_9621811                                                                                                                                                                                                                                                                                                  | Instituto Nacional de Saude (INS), Mozambique                                                   | CERI, Centre for Epidemic Response and Innoation, Stellenbosch University and KRISP, KZN Research Innovation and Sequencing Platform, UKZN.                                                                          | Anyaneji Uj; Giandhari J; Maharaj A; Moir M; Nadia Siteo; Naicker D; Naidoo Y; Nalia Ismael; Nedio Mabunda; Paulo Arnaldo; Pillay S; San JE; Tegally H; Tshiabula D; Van Wyk S; Wilkinson E; de Oliveira T                                                                                                                                                                   |
| EPI_ISL_9705742                                                                                                                                                                                                                                                                                                  | Instytut Genetyki Sądowej Sp. z o.o.                                                            | 15. Tricity SARS-CoV-2 sequencing consortium: University of Gdansk, Medical University of Gdansk, Vaxican Ltd., Invicta Ltd. 2. National Institute of Public Health - National Institute of Hygiene, Warsaw, Poland  | Celina Cybulska; Karolina Gackowska; Katarzyna Groth; Katarzyna Zacharczuk; Krystyna Bienkowska Szewczyk; Lukasz Rabalski; Maciej Grzybek; Maciej Kosinski; Magdalena Nowakowska; Marcin Lubocki; Małgorzata Sadkowska-Todys; Tomasz Wolkowicz                                                                                                                               |
| EPI_ISL_9705755                                                                                                                                                                                                                                                                                                  | Instytut Genetyki Sądowej Sp. z o.o.                                                            | 28. Tricity SARS-CoV-2 sequencing consortium: University of Gdansk, Medical University of Gdansk, Vaxican Ltd., Invicta Ltd. 2. National Institute of Public Health - National Institute of Hygiene, Warsaw, Poland  | Celina Cybulska; Karolina Gackowska; Katarzyna Groth; Katarzyna Zacharczuk; Krystyna Bienkowska Szewczyk; Lukasz Rabalski; Maciej Grzybek; Maciej Kosinski; Magdalena Nowakowska; Marcin Lubocki; Małgorzata Sadkowska-Todys; Tomasz Wolkowicz                                                                                                                               |
| EPI_ISL_9705731                                                                                                                                                                                                                                                                                                  | Instytut Genetyki Sądowej Sp. z o.o.                                                            | 4. Tricity SARS-CoV-2 sequencing consortium: University of Gdansk, Medical University of Gdansk, Vaxican Ltd., Invicta Ltd. 2. National Institute of Public Health - National Institute of Hygiene, Warsaw, Poland   | Celina Cybulska; Karolina Gackowska; Katarzyna Groth; Katarzyna Zacharczuk; Krystyna Bienkowska Szewczyk; Lukasz Rabalski; Maciej Grzybek; Maciej Kosinski; Magdalena Nowakowska; Marcin Lubocki; Małgorzata Sadkowska-Todys; Tomasz Wolkowicz                                                                                                                               |
| EPI_ISL_9706310                                                                                                                                                                                                                                                                                                  | Instytut Genetyki Sądowej Sp. z o.o.                                                            | 669. Tricity SARS-CoV-2 sequencing consortium: University of Gdansk, Medical University of Gdansk, Vaxican Ltd., Invicta Ltd. 2. National Institute of Public Health - National Institute of Hygiene, Warsaw, Poland | Celina Cybulska; Karolina Gackowska; Katarzyna Groth; Katarzyna Zacharczuk; Krystyna Bienkowska Szewczyk; Lukasz Rabalski; Maciej Grzybek; Maciej Kosinski; Magdalena Nowakowska; Marcin Lubocki; Małgorzata Sadkowska-Todys; Tomasz Wolkowicz                                                                                                                               |
| EPI_ISL_9706313                                                                                                                                                                                                                                                                                                  | Instytut Genetyki Sądowej Sp. z o.o.                                                            | 672. Tricity SARS-CoV-2 sequencing consortium: University of Gdansk, Medical University of Gdansk, Vaxican Ltd., Invicta Ltd. 2. National Institute of Public Health - National Institute of Hygiene, Warsaw, Poland | Celina Cybulska; Karolina Gackowska; Katarzyna Groth; Katarzyna Zacharczuk; Krystyna Bienkowska Szewczyk; Lukasz Rabalski; Maciej Grzybek; Maciej Kosinski; Magdalena Nowakowska; Marcin Lubocki; Małgorzata Sadkowska-Todys; Tomasz Wolkowicz                                                                                                                               |



|                                                                                                                                                                                                                                                                                                                                                                                                                        |                                              |                                                                                                                                                                                                                      |                                                                                                                                                                                                                                                |                                                                                                                                                                                                                                                                                                                                                                                                                                                                                                                                                                                                                                                                                                         |
|------------------------------------------------------------------------------------------------------------------------------------------------------------------------------------------------------------------------------------------------------------------------------------------------------------------------------------------------------------------------------------------------------------------------|----------------------------------------------|----------------------------------------------------------------------------------------------------------------------------------------------------------------------------------------------------------------------|------------------------------------------------------------------------------------------------------------------------------------------------------------------------------------------------------------------------------------------------|---------------------------------------------------------------------------------------------------------------------------------------------------------------------------------------------------------------------------------------------------------------------------------------------------------------------------------------------------------------------------------------------------------------------------------------------------------------------------------------------------------------------------------------------------------------------------------------------------------------------------------------------------------------------------------------------------------|
| EPI_ISL_9706377                                                                                                                                                                                                                                                                                                                                                                                                        | Institut Genetyki Sądowej Sp. z o.o.         | 740. Tricity SARS-CoV-2 sequencing consortium: University of Gdansk, Medical University of Gdansk, Vaxican Ltd., Invicta Ltd. 2. National Institute of Public Health - National Institute of Hygiene, Warsaw, Poland | Celina Cybulska; Karolina Gackowska; Katarzyna Groth; Katarzyna Zacharczuk; Krystyna Bienkowska Szewczyk; Lukasz Rabalski; Maciej Grzybek; Maciej Kosinski; Magdalena Nowakowska; Marcin Lubocki; Małgorzata Sadkowska-Todys; Tomasz Wolkowicz |                                                                                                                                                                                                                                                                                                                                                                                                                                                                                                                                                                                                                                                                                                         |
| EPI_ISL_9706394                                                                                                                                                                                                                                                                                                                                                                                                        | Institut Genetyki Sądowej Sp. z o.o.         | 758. Tricity SARS-CoV-2 sequencing consortium: University of Gdansk, Medical University of Gdansk, Vaxican Ltd., Invicta Ltd. 2. National Institute of Public Health - National Institute of Hygiene, Warsaw, Poland | Celina Cybulska; Karolina Gackowska; Katarzyna Groth; Katarzyna Zacharczuk; Krystyna Bienkowska Szewczyk; Lukasz Rabalski; Maciej Grzybek; Maciej Kosinski; Magdalena Nowakowska; Marcin Lubocki; Małgorzata Sadkowska-Todys; Tomasz Wolkowicz |                                                                                                                                                                                                                                                                                                                                                                                                                                                                                                                                                                                                                                                                                                         |
| EPI_ISL_9175382, EPI_ISL_9252718, EPI_ISL_9276012, EPI_ISL_9277521, EPI_ISL_9278935, EPI_ISL_9278976, EPI_ISL_9279181, EPI_ISL_9279425, EPI_ISL_9297625, EPI_ISL_9297800, EPI_ISL_9299051, EPI_ISL_9313547, EPI_ISL_9313584, EPI_ISL_9313747, EPI_ISL_9313794, EPI_ISL_9313799, EPI_ISL_9313976, EPI_ISL_9368076, EPI_ISL_9445903, EPI_ISL_9445908, EPI_ISL_9445953, EPI_ISL_9445987, EPI_ISL_9446297                  | see above                                    | Integrated Covid Hub North East                                                                                                                                                                                      | Wellcome Sanger Institute for the COVID-19 Genomics UK (COG-UK) Consortium                                                                                                                                                                     | Cordelia Langford; David K. Jackson; Dominic Kwiatkowski; Ewan Harrison; Ian Johnston; Integrated Covid Hub North East and Alex Alderton; Jeffrey Barrett; John Sillitoe on behalf of the Wellcome Sanger Institute COVID-19 Surveillance Team; Roberto Amato; Sonia Goncalves                                                                                                                                                                                                                                                                                                                                                                                                                          |
| EPI_ISL_9184308, EPI_ISL_9353809, EPI_ISL_9353810                                                                                                                                                                                                                                                                                                                                                                      | see above                                    | Jessa                                                                                                                                                                                                                | Jessa                                                                                                                                                                                                                                          | Severine Berden et al. on behalf of the Jessa_cmdLab                                                                                                                                                                                                                                                                                                                                                                                                                                                                                                                                                                                                                                                    |
| EPI_ISL_9522845, EPI_ISL_9522848, EPI_ISL_9522849, EPI_ISL_9522864, EPI_ISL_9522867, EPI_ISL_9522869, EPI_ISL_9522872, EPI_ISL_9522879, EPI_ISL_9522900, EPI_ISL_9522913, EPI_ISL_9522934, EPI_ISL_9522941, EPI_ISL_9522942, EPI_ISL_9522943, EPI_ISL_9522948, EPI_ISL_9622949                                                                                                                                         | see above                                    | Karolinska University Hospital Huddinge                                                                                                                                                                              | Karolinska University Hospital                                                                                                                                                                                                                 | Annika Tivejlung Lindell; Henning Onsbring; Jan Albert; Karina Hentrich; Lynda Eneh; Maria Ropat; Martin Ekman; Natalija Gerasimcik; Robert Drydak; Sandra Brodlesson; Shambhu Ganeshappa Aralaguppe; Tanja Normark; Tobias Allander; Valteri Wirta; Zhibing Yun                                                                                                                                                                                                                                                                                                                                                                                                                                        |
| EPI_ISL_9522974, EPI_ISL_9522978, EPI_ISL_9522979, EPI_ISL_9522993, EPI_ISL_9523002, EPI_ISL_9523013, EPI_ISL_9523015, EPI_ISL_9523018, EPI_ISL_9523022, EPI_ISL_9523028, EPI_ISL_9523049, EPI_ISL_9523054, EPI_ISL_9523058, EPI_ISL_9523067, EPI_ISL_9523071, EPI_ISL_9523095, EPI_ISL_9523096, EPI_ISL_9523098, EPI_ISL_9523107, EPI_ISL_9523178, EPI_ISL_9523203, EPI_ISL_9523246, EPI_ISL_9523559, EPI_ISL_9523562 | see above                                    | Karolinska University Hospital Solna                                                                                                                                                                                 | Karolinska University Hospital                                                                                                                                                                                                                 | Annika Tivejlung Lindell; Henning Onsbring; Jan Albert; Karina Hentrich; Lynda Eneh; Maria Ropat; Martin Ekman; Natalija Gerasimcik; Robert Drydak; Sandra Brodlesson; Shambhu Ganeshappa Aralaguppe; Tanja Normark; Tobias Allander; Valteri Wirta; Zhibing Yun                                                                                                                                                                                                                                                                                                                                                                                                                                        |
| EPI_ISL_9651077                                                                                                                                                                                                                                                                                                                                                                                                        | see above                                    | Klinik Indosehat 2003                                                                                                                                                                                                | Genomik Solidaritas Indonesia Laboratorium                                                                                                                                                                                                     | Aisyi Sakina Rifani; Annisa Muthiah Sukirman; Anuraj Shankar; Ariel Pradipta; Dian Pitaloka Rajagukguk; Esti Rahayuning Tias; Gracia Felias Enos Korompis; Gunawan Eka Putra; Louisa Markus; Meutia Ayuputeri Kumaher; Stefanus Bernard; Vania Gavriła Wikasa                                                                                                                                                                                                                                                                                                                                                                                                                                           |
| EPI_ISL_9498036, EPI_ISL_9742406                                                                                                                                                                                                                                                                                                                                                                                       | see above                                    | Klinika za infektivne bolesti "Dr. Fran Mihaljević"                                                                                                                                                                  | Hrvatski zavod za javno zdravstvo                                                                                                                                                                                                              | Anita Jurić; Dragan Jurić; Irena Tabain; Ivana Ferenčak; Josipa Kuzle                                                                                                                                                                                                                                                                                                                                                                                                                                                                                                                                                                                                                                   |
| EPI_ISL_9223932, EPI_ISL_9223952, EPI_ISL_9223960, EPI_ISL_9223966, EPI_ISL_9224007, EPI_ISL_9224014, EPI_ISL_9458426, EPI_ISL_9458427, EPI_ISL_9458431, EPI_ISL_9458433, EPI_ISL_9458456, EPI_ISL_9458457, EPI_ISL_9458460, EPI_ISL_9458462, EPI_ISL_9458489                                                                                                                                                          | see above                                    | Klinikum Ernst von Bergmann gemeinnützige GmbH - stationärer Bereich                                                                                                                                                 | Robert Koch Institute                                                                                                                                                                                                                          |                                                                                                                                                                                                                                                                                                                                                                                                                                                                                                                                                                                                                                                                                                         |
| EPI_ISL_9412313, EPI_ISL_9412314, EPI_ISL_9412327                                                                                                                                                                                                                                                                                                                                                                      | see above                                    | Klinisch Laboratorium ZNA                                                                                                                                                                                            | Klinisch Laboratorium ZNA                                                                                                                                                                                                                      | Verstrepen et al.                                                                                                                                                                                                                                                                                                                                                                                                                                                                                                                                                                                                                                                                                       |
| EPI_ISL_9795930                                                                                                                                                                                                                                                                                                                                                                                                        | LABORATOIRE d'ANALYSES de BIOLOGIE MEDICALES | CNR Virus des Infections Respiratoires - France SUD                                                                                                                                                                  |                                                                                                                                                                                                                                                | Antonin Bal; Bruno Lina; Bruno Simon; Gregory Destras; Gwendolynne Burfin; Hadrien Regue; Laurence Josset; Martine Valette; Quentin Semanas; Theophile Boyer                                                                                                                                                                                                                                                                                                                                                                                                                                                                                                                                            |
| EPI_ISL_9432048, EPI_ISL_9432105                                                                                                                                                                                                                                                                                                                                                                                       | LABORATORIUM BADAŃ KLINICZNYCH WSSE w OPOLU  | 1. Academic Center for Pathomorphological and Genetic-Molecular Diagnostics Ltd, Białystok, Poland<br>2. National Institute of Public Health - National Institute of Hygiene, Warsaw, Poland                         |                                                                                                                                                                                                                                                | Anetta Sulewska; Jacek Nikliński; Janusz Dzieciol; Joanna Kiśluk; Katarzyna Zacharczuk; Konrad Raczkowski; Magdalena Nowakowska; Małgorzata Sadkowska-Todys; Piotr Karabowicz; Piotr Majewski; Przemysław Bieчек. Joanna Reszeć; Radosław Charkiewicz; Tomasz Wolkowicz                                                                                                                                                                                                                                                                                                                                                                                                                                 |
| EPI_ISL_9458190, EPI_ISL_9743254, EPI_ISL_9743398, EPI_ISL_9743537, EPI_ISL_9743660, EPI_ISL_9743796, EPI_ISL_9743828, EPI_ISL_9743862, EPI_ISL_9743876, EPI_ISL_9743885, EPI_ISL_9743922, EPI_ISL_9743944, EPI_ISL_9743963                                                                                                                                                                                            | see above                                    | LADR Zentrallabor DR. Kramer & Kollegen Geesthacht                                                                                                                                                                   | Robert Koch Institute                                                                                                                                                                                                                          |                                                                                                                                                                                                                                                                                                                                                                                                                                                                                                                                                                                                                                                                                                         |
| EPI_ISL_9679606, EPI_ISL_9679607, EPI_ISL_9679608, EPI_ISL_9679609, EPI_ISL_9679610, EPI_ISL_9679612, EPI_ISL_9679613                                                                                                                                                                                                                                                                                                  | see above                                    | LANCET                                                                                                                                                                                                               | National Institute for Communicable Diseases of the National Health Laboratory Service                                                                                                                                                         | Amoako DG; Bhiman JN; Everatt J; Ismail A; Kekana D; Mahlangu B; Mnguni A; Mohale T; Ntuli N; Scheepers C; Wolter N                                                                                                                                                                                                                                                                                                                                                                                                                                                                                                                                                                                     |
| EPI_ISL_9751310, EPI_ISL_9751311                                                                                                                                                                                                                                                                                                                                                                                       | see above                                    | Lab Biomed Kota Serang                                                                                                                                                                                               | National Institute of Health Research and Development                                                                                                                                                                                          | Arie Ardiansyah Nugraha; Fajar Nur Sulistyohadi; Hana Apsari Pawestri; Hartanti Dian Ikawati; Kartika Dewi Puspa; Nelly Puspandari; Nur Ika Hariastuti; Putri Widia; Subangkit; Vivi Setiawaty                                                                                                                                                                                                                                                                                                                                                                                                                                                                                                          |
| EPI_ISL_9631782                                                                                                                                                                                                                                                                                                                                                                                                        | see above                                    | Lab. Microbiologia e Virologia Cutogno A.O. dei Colli                                                                                                                                                                | TIGEM                                                                                                                                                                                                                                          | Antonio Grimaldi Patrizia Annunziata Francesco Panariello Claudia Tiberio Teresa Giuliano Valentina Bouche Chiara Colantuono Michela Daniele Lucio Di Filippo Anna Manfredi Marcello Salvi Antonio Limone Luigi Atripaldi Andrea Ballabio Davide Cacciarielli                                                                                                                                                                                                                                                                                                                                                                                                                                           |
| EPI_ISL_9433925, EPI_ISL_9433951, EPI_ISL_9434112, EPI_ISL_9434120, EPI_ISL_9434159, EPI_ISL_9434172, EPI_ISL_9434180, EPI_ISL_9434222, EPI_ISL_9434236, EPI_ISL_9636526, EPI_ISL_9636684, EPI_ISL_9636716, EPI_ISL_9636731, EPI_ISL_9636752, EPI_ISL_9671862                                                                                                                                                          | see above                                    | LabPLUS                                                                                                                                                                                                              | Institute of Environmental Science and Research (ESR)                                                                                                                                                                                          | Anja Werno; Antje van der Linden; Arlo Upton; Chris Mansell; Clare Gebbie; David Hamner; Dhanisha Patel; Dragana Drinkovic; Erasmus Smit; Gary McAuliffe; Hana Sofia Andersson; Hermes Perez; James Ussher; Jill Sherwood; Jing Wang; Joep de Lig; Josh Freeman; Julia Howard; Juliet Elvy; Lauren Jelly; Mary DeAlmeida; Matt Blakiston; Matt Storey; Matthew Rogers; Max Bloomfield; Michael Addidle; Michelle Balm; Muhammad Faisal; Nikki Freed; Olin Silander; Olivia Stroeven; Rachel Boyle; Sally Roberts; SallyAnn Harbison; Sarah Cockerton; Sarah Jefferies; Sharmini Mutaiyah; Susan Morpeth; Susan Taylor; Timothy Blackmore; Vani Sathyendran; Veronica Playle; Virginia Hope; Xiaoyun Ren |
| EPI_ISL_9489305, EPI_ISL_9489321, EPI_ISL_9489335, EPI_ISL_9489336, EPI_ISL_9489337, EPI_ISL_9665069, EPI_ISL_9665071, EPI_ISL_9665102                                                                                                                                                                                                                                                                                 | see above                                    | Labor Berlin Charité Vivantes GmbH / Institut für Virologie                                                                                                                                                          | Charité Universitätsmedizin Berlin, Institut für Virologie/Labor Berlin                                                                                                                                                                        | Barbara Mühlemann; Christian Drosten; Christine Stephan; Peter Menzel; Rolf Schwarzer; Terry Jones; Victor M Corman                                                                                                                                                                                                                                                                                                                                                                                                                                                                                                                                                                                     |
| EPI_ISL_9462399                                                                                                                                                                                                                                                                                                                                                                                                        | see above                                    | Labor Dr. Brunner Konstanz                                                                                                                                                                                           | Robert Koch Institute                                                                                                                                                                                                                          |                                                                                                                                                                                                                                                                                                                                                                                                                                                                                                                                                                                                                                                                                                         |
| EPI_ISL_9223731                                                                                                                                                                                                                                                                                                                                                                                                        | see above                                    | Labor Kneißler GmbH & Co. KG                                                                                                                                                                                         | Robert Koch Institute                                                                                                                                                                                                                          |                                                                                                                                                                                                                                                                                                                                                                                                                                                                                                                                                                                                                                                                                                         |
| EPI_ISL_9461926, EPI_ISL_9461980, EPI_ISL_9462385, EPI_ISL_9462390, EPI_ISL_9462405, EPI_ISL_9462417, EPI_ISL_9462424, EPI_ISL_9462425, EPI_ISL_9462429, EPI_ISL_9462445, EPI_ISL_9462448, EPI_ISL_9462470, EPI_ISL_9462503                                                                                                                                                                                            | see above                                    | Labor Lübeck bzw. Laborärztliche Gemeinschaftspraxis Lübeck                                                                                                                                                          | Robert Koch Institute                                                                                                                                                                                                                          |                                                                                                                                                                                                                                                                                                                                                                                                                                                                                                                                                                                                                                                                                                         |
| EPI_ISL_9447727, EPI_ISL_9447778, EPI_ISL_9715797, EPI_ISL_9715806, EPI_ISL_9715823, EPI_ISL_9716546                                                                                                                                                                                                                                                                                                                   | see above                                    | Labor Mönchengladbach MVZ Dr. Stein + Kollegen GbR                                                                                                                                                                   | Robert Koch Institute                                                                                                                                                                                                                          |                                                                                                                                                                                                                                                                                                                                                                                                                                                                                                                                                                                                                                                                                                         |
| EPI_ISL_9616693, EPI_ISL_9616694, EPI_ISL_9616696                                                                                                                                                                                                                                                                                                                                                                      | see above                                    | Laboratoire national de sante, Microbiology, Virology                                                                                                                                                                | Laboratoire national de sante, Microbiology, Microbial Genomics Platform                                                                                                                                                                       | Anke Wienecke-Baldacchino; Catherine Ragimbeau; Elodie Solarino; Fatu Djabi; Jessica Tapp; Lise Pignon; Raoul Salmon; Sibel Berger; Tamir Abdelrahman; Trung Nguyen Nguyen; Virginie Jover                                                                                                                                                                                                                                                                                                                                                                                                                                                                                                              |
| EPI_ISL_9287676                                                                                                                                                                                                                                                                                                                                                                                                        | see above                                    | Laboratori de Referencia de Catalunya                                                                                                                                                                                | Laboratori de Referencia de Catalunya                                                                                                                                                                                                          | Bellosillo B.; Canal M.; Hernandez JJ.; Padilla E.; Ramirez A.; Vilas A.                                                                                                                                                                                                                                                                                                                                                                                                                                                                                                                                                                                                                                |
| EPI_ISL_9376198, EPI_ISL_9376206, EPI_ISL_9376219, EPI_ISL_9673434                                                                                                                                                                                                                                                                                                                                                     | see above                                    | Laboratoria Medyczne Bruss grupa ALAB sp. z o.o.; Medyczne Laboratorium Diagnostyczne, Pracownia Genetyki                                                                                                            | 1. Tricity SARS-CoV-2 sequencing consortium: University of Gdansk, Medical University of Gdansk, Vaxican Ltd., Invicta Ltd. 2. National Institute of Public Health - National Institute of Hygiene, Warsaw, Poland                             | Celina Cybulska; Karolina Gackowska; Katarzyna Groth; Katarzyna Zacharczuk; Krystyna Bienkowska Szewczyk; Lukasz Rabalski; Maciej Grzybek; Maciej Kosinski; Magdalena Nowakowska; Marcin Lubocki; Małgorzata Sadkowska-Todys; Tomasz Wolkowicz                                                                                                                                                                                                                                                                                                                                                                                                                                                          |
| EPI_ISL_9312240                                                                                                                                                                                                                                                                                                                                                                                                        | see above                                    | Laboratorio CQRC                                                                                                                                                                                                     | CQRC_QUALITY CONTROL CHEMICAL BIOLOGICAL RISK_AOODR Villa Sofia Cervello Palermo                                                                                                                                                               | Brunacci G.; Contino F.; Di Gaudio F.                                                                                                                                                                                                                                                                                                                                                                                                                                                                                                                                                                                                                                                                   |
| EPI_ISL_9387418, EPI_ISL_9387439                                                                                                                                                                                                                                                                                                                                                                                       | see above                                    | Laboratorio di Microbiologia                                                                                                                                                                                         | Laboratorio di Microbiologia, Istituto di Medicina di Laboratorio EOLAB, Ente Ospedaliero Cantonale                                                                                                                                            | Martinetti Lucchini Gladys; Valeria Spina                                                                                                                                                                                                                                                                                                                                                                                                                                                                                                                                                                                                                                                               |
| EPI_ISL_9534196                                                                                                                                                                                                                                                                                                                                                                                                        | see above                                    | Laboratorium Analiz Lekarskich ALAB Szczecin Energetyków                                                                                                                                                             | 1. Tricity SARS-CoV-2 sequencing consortium: University of Gdansk, Medical University of Gdansk, Vaxican Ltd., Invicta Ltd. 2. National Institute of Public Health - National Institute of Hygiene, Warsaw, Poland                             | Celina Cybulska; Karolina Gackowska; Katarzyna Groth; Katarzyna Zacharczuk; Krystyna Bienkowska Szewczyk; Lukasz Rabalski; Maciej Grzybek; Maciej Kosinski; Magdalena Nowakowska; Marcin Lubocki; Małgorzata Sadkowska-Todys; Tomasz Wolkowicz                                                                                                                                                                                                                                                                                                                                                                                                                                                          |
| EPI_ISL_9431447, EPI_ISL_9431448, EPI_ISL_9431456                                                                                                                                                                                                                                                                                                                                                                      | see above                                    | Laboratorium Analiz Lekarskich ALAB Łódź                                                                                                                                                                             | 1. Academic Center for Pathomorphological and Genetic-Molecular Diagnostics Ltd, Białystok, Poland<br>2. National Institute of Public Health - National Institute of Hygiene, Warsaw, Poland                                                   | Anetta Sulewska; Jacek Nikliński; Janusz Dzieciol; Joanna Kiśluk; Katarzyna Zacharczuk; Konrad Raczkowski; Magdalena Nowakowska; Małgorzata Sadkowska-Todys; Piotr Karabowicz; Piotr Majewski; Przemysław Bieчек. Joanna Reszeć; Radosław Charkiewicz; Tomasz Wolkowicz                                                                                                                                                                                                                                                                                                                                                                                                                                 |
| EPI_ISL_9705908                                                                                                                                                                                                                                                                                                                                                                                                        | see above                                    | Laboratorium Analiz Lekarskich Alab Bydgoszcz                                                                                                                                                                        | 223. Tricity SARS-CoV-2 sequencing consortium: University of Gdansk, Medical University of Gdansk, Vaxican Ltd., Invicta Ltd. 2. National Institute of Public Health - National Institute of Hygiene, Warsaw, Poland                           | Celina Cybulska; Karolina Gackowska; Katarzyna Groth; Katarzyna Zacharczuk; Krystyna Bienkowska Szewczyk; Lukasz Rabalski; Maciej Grzybek; Maciej Kosinski; Magdalena Nowakowska; Marcin Lubocki; Małgorzata Sadkowska-Todys; Tomasz Wolkowicz                                                                                                                                                                                                                                                                                                                                                                                                                                                          |
| EPI_ISL_9688115, EPI_ISL_9688120                                                                                                                                                                                                                                                                                                                                                                                       | see above                                    | Laboratorium Centralne Krotoszyn                                                                                                                                                                                     | 1. Academic Center for Pathomorphological and Genetic-Molecular Diagnostics Ltd, Białystok, Poland<br>2. National Institute of Public Health - National Institute of Hygiene, Warsaw, Poland                                                   | Anetta Sulewska; Jacek Nikliński; Janusz Dzieciol; Joanna Kiśluk; Katarzyna Zacharczuk; Konrad Raczkowski; Magdalena Nowakowska; Małgorzata Sadkowska-Todys; Piotr Karabowicz; Piotr Majewski; Przemysław Bieчек. Joanna Reszeć; Radosław Charkiewicz; Tomasz Wolkowicz                                                                                                                                                                                                                                                                                                                                                                                                                                 |

|                                                                                                                                                                                                                                                                                                                                                                                                                                                                                                                                                                                                                                                                                                                                                                                                                                                                                                                                                                                                                                                                                                                                                                                                                                                                                                                                                                                                                                                                                                                                                                                                                                                                                                                                                                                                                                                                                                                                                                                                                                                                                                                                                                                                                                                                                                                                                                                                                                                                                                                                                                                                                                                                                                                                                                                                                                                                                                                                                                                                                                                                                                                                                                                                                                                                                                                                                                                                                                                                                                                                                                                                                                                                                                                                                                                                                                                                                                                                                                                                                                                                                                                                                                                                                                                                                                                                                                                                                                                                                                                                                                                                                                                                                                                                                                                                                                                                                                                                                                                                                                                                                                                                                                                                                                                                                                                                                                                                                                                                                                                                                                                                                                                                                                                                                                                                                                                                                                                                                                                                                                                                                                                                                                                                                                                                                                                                                                                                                                                                                                                                                                                                                                                                                                                                                                                                                                                                                                                                                                                                                                                                                                                                                                                                                                                                                                                                                                                                                                                                                                                                                                                                                                                                                                                                                                                                                                                                                                                                                                                                                                                                                                                                                                                                                                                                                                                                                                                                                                                                                                                                                                                                                                                                                                                                                                                                                                                                                                                                                                                                                                                                                                                                                                                                                                                                                                                                                                                                                                                                                                                                                                                                                                                                                                                                                                                                                                                                                                                                                                                                                                                                                                                                                                                                                                                                                                                                                                                                                                                                                                                                                                                                                                                                                                                                                                                                                                                                                                                                                                                                                                                                                                                                                                                                                                                                                                                                                                                                                                                                                                                                                                                                                                                                                                                                                                                                                                                                                                                                                                                                                                                                                                                                                                                                                                                                                                                                                                                                                                                                                                                                                                                                                                                                                                                                                                                                                                                                                                                                                                                                                                                                                                                                                                                                                                                                                                                                                                                                                                                                                                                                                                                                                                                                                                                                                                                                                                                                                                                                                                                                                                                                                                                                                                                                                                                                                                                                                                                                                                                                                                                                                                                                                                                                                                                                                                                                                                                                                                                                                                                                                                                                                                                                                                                                                                                                                                                                                                                                                                                                                                                                                                                                                                                                                                                                 |                                                                             |                                                                                              |                                                                                                                                                                                                                                                                                                                                                                                                                                                                                                                                                                                                                                                                                                                                                                                                                                                                                                                                                                                                                                                                                   |
|---------------------------------------------------------------------------------------------------------------------------------------------------------------------------------------------------------------------------------------------------------------------------------------------------------------------------------------------------------------------------------------------------------------------------------------------------------------------------------------------------------------------------------------------------------------------------------------------------------------------------------------------------------------------------------------------------------------------------------------------------------------------------------------------------------------------------------------------------------------------------------------------------------------------------------------------------------------------------------------------------------------------------------------------------------------------------------------------------------------------------------------------------------------------------------------------------------------------------------------------------------------------------------------------------------------------------------------------------------------------------------------------------------------------------------------------------------------------------------------------------------------------------------------------------------------------------------------------------------------------------------------------------------------------------------------------------------------------------------------------------------------------------------------------------------------------------------------------------------------------------------------------------------------------------------------------------------------------------------------------------------------------------------------------------------------------------------------------------------------------------------------------------------------------------------------------------------------------------------------------------------------------------------------------------------------------------------------------------------------------------------------------------------------------------------------------------------------------------------------------------------------------------------------------------------------------------------------------------------------------------------------------------------------------------------------------------------------------------------------------------------------------------------------------------------------------------------------------------------------------------------------------------------------------------------------------------------------------------------------------------------------------------------------------------------------------------------------------------------------------------------------------------------------------------------------------------------------------------------------------------------------------------------------------------------------------------------------------------------------------------------------------------------------------------------------------------------------------------------------------------------------------------------------------------------------------------------------------------------------------------------------------------------------------------------------------------------------------------------------------------------------------------------------------------------------------------------------------------------------------------------------------------------------------------------------------------------------------------------------------------------------------------------------------------------------------------------------------------------------------------------------------------------------------------------------------------------------------------------------------------------------------------------------------------------------------------------------------------------------------------------------------------------------------------------------------------------------------------------------------------------------------------------------------------------------------------------------------------------------------------------------------------------------------------------------------------------------------------------------------------------------------------------------------------------------------------------------------------------------------------------------------------------------------------------------------------------------------------------------------------------------------------------------------------------------------------------------------------------------------------------------------------------------------------------------------------------------------------------------------------------------------------------------------------------------------------------------------------------------------------------------------------------------------------------------------------------------------------------------------------------------------------------------------------------------------------------------------------------------------------------------------------------------------------------------------------------------------------------------------------------------------------------------------------------------------------------------------------------------------------------------------------------------------------------------------------------------------------------------------------------------------------------------------------------------------------------------------------------------------------------------------------------------------------------------------------------------------------------------------------------------------------------------------------------------------------------------------------------------------------------------------------------------------------------------------------------------------------------------------------------------------------------------------------------------------------------------------------------------------------------------------------------------------------------------------------------------------------------------------------------------------------------------------------------------------------------------------------------------------------------------------------------------------------------------------------------------------------------------------------------------------------------------------------------------------------------------------------------------------------------------------------------------------------------------------------------------------------------------------------------------------------------------------------------------------------------------------------------------------------------------------------------------------------------------------------------------------------------------------------------------------------------------------------------------------------------------------------------------------------------------------------------------------------------------------------------------------------------------------------------------------------------------------------------------------------------------------------------------------------------------------------------------------------------------------------------------------------------------------------------------------------------------------------------------------------------------------------------------------------------------------------------------------------------------------------------------------------------------------------------------------------------------------------------------------------------------------------------------------------------------------------------------------------------------------------------------------------------------------------------------------------------------------------------------------------------------------------------------------------------------------------------------------------------------------------------------------------------------------------------------------------------------------------------------------------------------------------------------------------------------------------------------------------------------------------------------------------------------------------------------------------------------------------------------------------------------------------------------------------------------------------------------------------------------------------------------------------------------------------------------------------------------------------------------------------------------------------------------------------------------------------------------------------------------------------------------------------------------------------------------------------------------------------------------------------------------------------------------------------------------------------------------------------------------------------------------------------------------------------------------------------------------------------------------------------------------------------------------------------------------------------------------------------------------------------------------------------------------------------------------------------------------------------------------------------------------------------------------------------------------------------------------------------------------------------------------------------------------------------------------------------------------------------------------------------------------------------------------------------------------------------------------------------------------------------------------------------------------------------------------------------------------------------------------------------------------------------------------------------------------------------------------------------------------------------------------------------------------------------------------------------------------------------------------------------------------------------------------------------------------------------------------------------------------------------------------------------------------------------------------------------------------------------------------------------------------------------------------------------------------------------------------------------------------------------------------------------------------------------------------------------------------------------------------------------------------------------------------------------------------------------------------------------------------------------------------------------------------------------------------------------------------------------------------------------------------------------------------------------------------------------------------------------------------------------------------------------------------------------------------------------------------------------------------------------------------------------------------------------------------------------------------------------------------------------------------------------------------------------------------------------------------------------------------------------------------------------------------------------------------------------------------------------------------------------------------------------------------------------------------------------------------------------------------------------------------------------------------------------------------------------------------------------------------------------------------------------------------------------------------------------------------------------------------------------------------------------------------------------------------------------------------------------------------------------------------------------------------------------------------------------------------------------------------------------------------------------------------------------------------------------------------------------------------------------------------------------------------------------------------------------------------------------------------------------------------------------------------------------------------------------------------------------------------------------------------------------------------------------------------------------------------------------------------------------------------------------------------------------------------------------------------------------------------------------------------------------------------------------------------------------------------------------------------------------------------------------------------------------------------------------------------------------------------------------------------------------------------------------------------------------------------------------------------------------------------------------------------------------------------------------------------------------------------------------------------------------------------------------------------------------------------------------------------------------------------------------------------------------------------------------------------------------------------------------------------------------------------------------------------------------------------------------------------------------------------------------------------------------------------------------------------------------------------------------------------------------------------------------------------------------------------------------------------------------------------------------------------------------------------------------------------------------------------------------------------------------------------------------------------------------------------------------------------------------------------------------------------------------------------------------------------------------------------------------------------------------------------------------------------------------------------------------------------------------------------------------------------------------------------------------------------------------------------------------------------------------------------------------------------------------------------------------------------------------------------------------------------------------------------------------------------------------------------------------------------------------------------------------------------------------------------------------------------------------------------------------------------------------------------------------------------------------------------------------------------------------------|-----------------------------------------------------------------------------|----------------------------------------------------------------------------------------------|-----------------------------------------------------------------------------------------------------------------------------------------------------------------------------------------------------------------------------------------------------------------------------------------------------------------------------------------------------------------------------------------------------------------------------------------------------------------------------------------------------------------------------------------------------------------------------------------------------------------------------------------------------------------------------------------------------------------------------------------------------------------------------------------------------------------------------------------------------------------------------------------------------------------------------------------------------------------------------------------------------------------------------------------------------------------------------------|
| EPI_ISL_9498995,<br>EPI_ISL_9498987                                                                                                                                                                                                                                                                                                                                                                                                                                                                                                                                                                                                                                                                                                                                                                                                                                                                                                                                                                                                                                                                                                                                                                                                                                                                                                                                                                                                                                                                                                                                                                                                                                                                                                                                                                                                                                                                                                                                                                                                                                                                                                                                                                                                                                                                                                                                                                                                                                                                                                                                                                                                                                                                                                                                                                                                                                                                                                                                                                                                                                                                                                                                                                                                                                                                                                                                                                                                                                                                                                                                                                                                                                                                                                                                                                                                                                                                                                                                                                                                                                                                                                                                                                                                                                                                                                                                                                                                                                                                                                                                                                                                                                                                                                                                                                                                                                                                                                                                                                                                                                                                                                                                                                                                                                                                                                                                                                                                                                                                                                                                                                                                                                                                                                                                                                                                                                                                                                                                                                                                                                                                                                                                                                                                                                                                                                                                                                                                                                                                                                                                                                                                                                                                                                                                                                                                                                                                                                                                                                                                                                                                                                                                                                                                                                                                                                                                                                                                                                                                                                                                                                                                                                                                                                                                                                                                                                                                                                                                                                                                                                                                                                                                                                                                                                                                                                                                                                                                                                                                                                                                                                                                                                                                                                                                                                                                                                                                                                                                                                                                                                                                                                                                                                                                                                                                                                                                                                                                                                                                                                                                                                                                                                                                                                                                                                                                                                                                                                                                                                                                                                                                                                                                                                                                                                                                                                                                                                                                                                                                                                                                                                                                                                                                                                                                                                                                                                                                                                                                                                                                                                                                                                                                                                                                                                                                                                                                                                                                                                                                                                                                                                                                                                                                                                                                                                                                                                                                                                                                                                                                                                                                                                                                                                                                                                                                                                                                                                                                                                                                                                                                                                                                                                                                                                                                                                                                                                                                                                                                                                                                                                                                                                                                                                                                                                                                                                                                                                                                                                                                                                                                                                                                                                                                                                                                                                                                                                                                                                                                                                                                                                                                                                                                                                                                                                                                                                                                                                                                                                                                                                                                                                                                                                                                                                                                                                                                                                                                                                                                                                                                                                                                                                                                                                                                                                                                                                                                                                                                                                                                                                                                                                                                                                                                                             | Laboratorium Diagnostyczne Centrum Medyczne LuxMed                          | Wojewodzka Stacja Sanitarno-Epidemiologiczna w Rzeszowie, Laboratorium Diagnostyki Medycznej | Anna Nowakowska; Karolina Ostrowska; Katarzyna Wilk; Marzena Baranowska                                                                                                                                                                                                                                                                                                                                                                                                                                                                                                                                                                                                                                                                                                                                                                                                                                                                                                                                                                                                           |
| EPI_ISL_9506799                                                                                                                                                                                                                                                                                                                                                                                                                                                                                                                                                                                                                                                                                                                                                                                                                                                                                                                                                                                                                                                                                                                                                                                                                                                                                                                                                                                                                                                                                                                                                                                                                                                                                                                                                                                                                                                                                                                                                                                                                                                                                                                                                                                                                                                                                                                                                                                                                                                                                                                                                                                                                                                                                                                                                                                                                                                                                                                                                                                                                                                                                                                                                                                                                                                                                                                                                                                                                                                                                                                                                                                                                                                                                                                                                                                                                                                                                                                                                                                                                                                                                                                                                                                                                                                                                                                                                                                                                                                                                                                                                                                                                                                                                                                                                                                                                                                                                                                                                                                                                                                                                                                                                                                                                                                                                                                                                                                                                                                                                                                                                                                                                                                                                                                                                                                                                                                                                                                                                                                                                                                                                                                                                                                                                                                                                                                                                                                                                                                                                                                                                                                                                                                                                                                                                                                                                                                                                                                                                                                                                                                                                                                                                                                                                                                                                                                                                                                                                                                                                                                                                                                                                                                                                                                                                                                                                                                                                                                                                                                                                                                                                                                                                                                                                                                                                                                                                                                                                                                                                                                                                                                                                                                                                                                                                                                                                                                                                                                                                                                                                                                                                                                                                                                                                                                                                                                                                                                                                                                                                                                                                                                                                                                                                                                                                                                                                                                                                                                                                                                                                                                                                                                                                                                                                                                                                                                                                                                                                                                                                                                                                                                                                                                                                                                                                                                                                                                                                                                                                                                                                                                                                                                                                                                                                                                                                                                                                                                                                                                                                                                                                                                                                                                                                                                                                                                                                                                                                                                                                                                                                                                                                                                                                                                                                                                                                                                                                                                                                                                                                                                                                                                                                                                                                                                                                                                                                                                                                                                                                                                                                                                                                                                                                                                                                                                                                                                                                                                                                                                                                                                                                                                                                                                                                                                                                                                                                                                                                                                                                                                                                                                                                                                                                                                                                                                                                                                                                                                                                                                                                                                                                                                                                                                                                                                                                                                                                                                                                                                                                                                                                                                                                                                                                                                                                                                                                                                                                                                                                                                                                                                                                                                                                                                                                                                 | Laboratorium RSPP                                                           | Genomik Solidaritas Indonesia Laboratorium                                                   | Anna Christina Braop; Anna Muthiah Sukirman; Anuraj Shakkari; Ariel Pradipta; Carissa Sintca Vayala; Graçia Felias Eros Koromips; Louisa Markas; Meutia Ayuputeri Kumaheri; Stefanus Bernard                                                                                                                                                                                                                                                                                                                                                                                                                                                                                                                                                                                                                                                                                                                                                                                                                                                                                      |
| EPI_ISL_9484135,<br>EPI_ISL_9520954,<br>EPI_ISL_9523361,<br>EPI_ISL_9523497,<br>EPI_ISL_9523737                                                                                                                                                                                                                                                                                                                                                                                                                                                                                                                                                                                                                                                                                                                                                                                                                                                                                                                                                                                                                                                                                                                                                                                                                                                                                                                                                                                                                                                                                                                                                                                                                                                                                                                                                                                                                                                                                                                                                                                                                                                                                                                                                                                                                                                                                                                                                                                                                                                                                                                                                                                                                                                                                                                                                                                                                                                                                                                                                                                                                                                                                                                                                                                                                                                                                                                                                                                                                                                                                                                                                                                                                                                                                                                                                                                                                                                                                                                                                                                                                                                                                                                                                                                                                                                                                                                                                                                                                                                                                                                                                                                                                                                                                                                                                                                                                                                                                                                                                                                                                                                                                                                                                                                                                                                                                                                                                                                                                                                                                                                                                                                                                                                                                                                                                                                                                                                                                                                                                                                                                                                                                                                                                                                                                                                                                                                                                                                                                                                                                                                                                                                                                                                                                                                                                                                                                                                                                                                                                                                                                                                                                                                                                                                                                                                                                                                                                                                                                                                                                                                                                                                                                                                                                                                                                                                                                                                                                                                                                                                                                                                                                                                                                                                                                                                                                                                                                                                                                                                                                                                                                                                                                                                                                                                                                                                                                                                                                                                                                                                                                                                                                                                                                                                                                                                                                                                                                                                                                                                                                                                                                                                                                                                                                                                                                                                                                                                                                                                                                                                                                                                                                                                                                                                                                                                                                                                                                                                                                                                                                                                                                                                                                                                                                                                                                                                                                                                                                                                                                                                                                                                                                                                                                                                                                                                                                                                                                                                                                                                                                                                                                                                                                                                                                                                                                                                                                                                                                                                                                                                                                                                                                                                                                                                                                                                                                                                                                                                                                                                                                                                                                                                                                                                                                                                                                                                                                                                                                                                                                                                                                                                                                                                                                                                                                                                                                                                                                                                                                                                                                                                                                                                                                                                                                                                                                                                                                                                                                                                                                                                                                                                                                                                                                                                                                                                                                                                                                                                                                                                                                                                                                                                                                                                                                                                                                                                                                                                                                                                                                                                                                                                                                                                                                                                                                                                                                                                                                                                                                                                                                                                                                                                                                                 | Laboratory Corporation of America                                           | Centers for Disease Control and Prevention Division of Viral Diseases, Pathogen Discovery    | Amanda Douglas; Amanda Suchanec; Andrea Throop; Ayla Bunnis; Benjamin Rambo-Martin; Shobki Ari; Brian Krueger; Brian Norvell; Christopher Gulvic; Christos Petropoulos; Clinton Pandy; Craig Lukasik; Dakota Howard; Debbie Boles; Dhvani Batra; Duncan MacCannell; Eyal Almasi; Goran Stevovic; Howard Engler; Hrushikesh Deshmukh; Jake Humphrey; Jana Schroth; Jason Caravas; Joe Voshell; John Peltz; Jonathan Melzer; Jonathan Williams; Kimberly Wagner; Kristine Lacey; Lax Iyer; Lisa Pfefferle; Lyndon Tilson; Manoj Jain; Marcia Eisenberg; Mary Cristobal; Mary Williamson; Matthew Robinson; Matthew Schmermer; Michael Levandovski; Mike Sapeta; Minky Yoo; Minoo Agarwal; Mohan Kelli; Nuthwan Charoensri; Oren Cohen; Peter Cook; Prashant Gupta; Qian Zeng; Rama Ghathi; Scott Parker; Scott Ryan; Scott Sammons; Shatavia Morrison; Stanley Letovsky; Steven Ragan; Suresh Selvaraju; Susan Countryman; Susan Kucyk; Suzanne Dale; Thomas Urban; Tim Kuphal; Tricia Zwielfelhofer; Tymeckia Kendall; Victoria Caban Figueroa; Vincent Drouillon; Vesna Unarumchi |
| EPI_ISL_9799092                                                                                                                                                                                                                                                                                                                                                                                                                                                                                                                                                                                                                                                                                                                                                                                                                                                                                                                                                                                                                                                                                                                                                                                                                                                                                                                                                                                                                                                                                                                                                                                                                                                                                                                                                                                                                                                                                                                                                                                                                                                                                                                                                                                                                                                                                                                                                                                                                                                                                                                                                                                                                                                                                                                                                                                                                                                                                                                                                                                                                                                                                                                                                                                                                                                                                                                                                                                                                                                                                                                                                                                                                                                                                                                                                                                                                                                                                                                                                                                                                                                                                                                                                                                                                                                                                                                                                                                                                                                                                                                                                                                                                                                                                                                                                                                                                                                                                                                                                                                                                                                                                                                                                                                                                                                                                                                                                                                                                                                                                                                                                                                                                                                                                                                                                                                                                                                                                                                                                                                                                                                                                                                                                                                                                                                                                                                                                                                                                                                                                                                                                                                                                                                                                                                                                                                                                                                                                                                                                                                                                                                                                                                                                                                                                                                                                                                                                                                                                                                                                                                                                                                                                                                                                                                                                                                                                                                                                                                                                                                                                                                                                                                                                                                                                                                                                                                                                                                                                                                                                                                                                                                                                                                                                                                                                                                                                                                                                                                                                                                                                                                                                                                                                                                                                                                                                                                                                                                                                                                                                                                                                                                                                                                                                                                                                                                                                                                                                                                                                                                                                                                                                                                                                                                                                                                                                                                                                                                                                                                                                                                                                                                                                                                                                                                                                                                                                                                                                                                                                                                                                                                                                                                                                                                                                                                                                                                                                                                                                                                                                                                                                                                                                                                                                                                                                                                                                                                                                                                                                                                                                                                                                                                                                                                                                                                                                                                                                                                                                                                                                                                                                                                                                                                                                                                                                                                                                                                                                                                                                                                                                                                                                                                                                                                                                                                                                                                                                                                                                                                                                                                                                                                                                                                                                                                                                                                                                                                                                                                                                                                                                                                                                                                                                                                                                                                                                                                                                                                                                                                                                                                                                                                                                                                                                                                                                                                                                                                                                                                                                                                                                                                                                                                                                                                                                                                                                                                                                                                                                                                                                                                                                                                                                                                                                                                 | Laboratory for Molecular Diagnostics,iPHMN                                  | Laboratory for Molecular Diagnostics,iPHMN                                                   | Danijelea Vujosevic; Marija Godvedarica; Rejhan Hot                                                                                                                                                                                                                                                                                                                                                                                                                                                                                                                                                                                                                                                                                                                                                                                                                                                                                                                                                                                                                               |
| EPI_ISL_9793184,<br>EPI_ISL_9794941                                                                                                                                                                                                                                                                                                                                                                                                                                                                                                                                                                                                                                                                                                                                                                                                                                                                                                                                                                                                                                                                                                                                                                                                                                                                                                                                                                                                                                                                                                                                                                                                                                                                                                                                                                                                                                                                                                                                                                                                                                                                                                                                                                                                                                                                                                                                                                                                                                                                                                                                                                                                                                                                                                                                                                                                                                                                                                                                                                                                                                                                                                                                                                                                                                                                                                                                                                                                                                                                                                                                                                                                                                                                                                                                                                                                                                                                                                                                                                                                                                                                                                                                                                                                                                                                                                                                                                                                                                                                                                                                                                                                                                                                                                                                                                                                                                                                                                                                                                                                                                                                                                                                                                                                                                                                                                                                                                                                                                                                                                                                                                                                                                                                                                                                                                                                                                                                                                                                                                                                                                                                                                                                                                                                                                                                                                                                                                                                                                                                                                                                                                                                                                                                                                                                                                                                                                                                                                                                                                                                                                                                                                                                                                                                                                                                                                                                                                                                                                                                                                                                                                                                                                                                                                                                                                                                                                                                                                                                                                                                                                                                                                                                                                                                                                                                                                                                                                                                                                                                                                                                                                                                                                                                                                                                                                                                                                                                                                                                                                                                                                                                                                                                                                                                                                                                                                                                                                                                                                                                                                                                                                                                                                                                                                                                                                                                                                                                                                                                                                                                                                                                                                                                                                                                                                                                                                                                                                                                                                                                                                                                                                                                                                                                                                                                                                                                                                                                                                                                                                                                                                                                                                                                                                                                                                                                                                                                                                                                                                                                                                                                                                                                                                                                                                                                                                                                                                                                                                                                                                                                                                                                                                                                                                                                                                                                                                                                                                                                                                                                                                                                                                                                                                                                                                                                                                                                                                                                                                                                                                                                                                                                                                                                                                                                                                                                                                                                                                                                                                                                                                                                                                                                                                                                                                                                                                                                                                                                                                                                                                                                                                                                                                                                                                                                                                                                                                                                                                                                                                                                                                                                                                                                                                                                                                                                                                                                                                                                                                                                                                                                                                                                                                                                                                                                                                                                                                                                                                                                                                                                                                                                                                                                                                                                                             | Laboratory of Genomics and Bioinformatics, Comenius University Science Park | Laboratory of Genomics and Bioinformatics, Comenius University Science Park                  | Anna Kaliňáková; Barbora Kotvasová; Diana Rusnáková; Jakub Štyk; Jaroslav Budí; Lucia Ševčíková; Michaela Jakubková Forgáčová; Miroslav Böhrer; Nikola Lipková; Pavol Mišenko; Tatiana Sedláčková; Terézia Vrabľová; Tomáš Szemes                                                                                                                                                                                                                                                                                                                                                                                                                                                                                                                                                                                                                                                                                                                                                                                                                                                 |
| EPI_ISL_9230344                                                                                                                                                                                                                                                                                                                                                                                                                                                                                                                                                                                                                                                                                                                                                                                                                                                                                                                                                                                                                                                                                                                                                                                                                                                                                                                                                                                                                                                                                                                                                                                                                                                                                                                                                                                                                                                                                                                                                                                                                                                                                                                                                                                                                                                                                                                                                                                                                                                                                                                                                                                                                                                                                                                                                                                                                                                                                                                                                                                                                                                                                                                                                                                                                                                                                                                                                                                                                                                                                                                                                                                                                                                                                                                                                                                                                                                                                                                                                                                                                                                                                                                                                                                                                                                                                                                                                                                                                                                                                                                                                                                                                                                                                                                                                                                                                                                                                                                                                                                                                                                                                                                                                                                                                                                                                                                                                                                                                                                                                                                                                                                                                                                                                                                                                                                                                                                                                                                                                                                                                                                                                                                                                                                                                                                                                                                                                                                                                                                                                                                                                                                                                                                                                                                                                                                                                                                                                                                                                                                                                                                                                                                                                                                                                                                                                                                                                                                                                                                                                                                                                                                                                                                                                                                                                                                                                                                                                                                                                                                                                                                                                                                                                                                                                                                                                                                                                                                                                                                                                                                                                                                                                                                                                                                                                                                                                                                                                                                                                                                                                                                                                                                                                                                                                                                                                                                                                                                                                                                                                                                                                                                                                                                                                                                                                                                                                                                                                                                                                                                                                                                                                                                                                                                                                                                                                                                                                                                                                                                                                                                                                                                                                                                                                                                                                                                                                                                                                                                                                                                                                                                                                                                                                                                                                                                                                                                                                                                                                                                                                                                                                                                                                                                                                                                                                                                                                                                                                                                                                                                                                                                                                                                                                                                                                                                                                                                                                                                                                                                                                                                                                                                                                                                                                                                                                                                                                                                                                                                                                                                                                                                                                                                                                                                                                                                                                                                                                                                                                                                                                                                                                                                                                                                                                                                                                                                                                                                                                                                                                                                                                                                                                                                                                                                                                                                                                                                                                                                                                                                                                                                                                                                                                                                                                                                                                                                                                                                                                                                                                                                                                                                                                                                                                                                                                                                                                                                                                                                                                                                                                                                                                                                                                                                                                                                 | Landesamt für Verbraucherschutz des Landes Sachsen-Anhalt                   | Robert Koch Institute                                                                        |                                                                                                                                                                                                                                                                                                                                                                                                                                                                                                                                                                                                                                                                                                                                                                                                                                                                                                                                                                                                                                                                                   |
| EPI_ISL_9525816,<br>EPI_ISL_9525824,<br>EPI_ISL_9525825,<br>EPI_ISL_9525860                                                                                                                                                                                                                                                                                                                                                                                                                                                                                                                                                                                                                                                                                                                                                                                                                                                                                                                                                                                                                                                                                                                                                                                                                                                                                                                                                                                                                                                                                                                                                                                                                                                                                                                                                                                                                                                                                                                                                                                                                                                                                                                                                                                                                                                                                                                                                                                                                                                                                                                                                                                                                                                                                                                                                                                                                                                                                                                                                                                                                                                                                                                                                                                                                                                                                                                                                                                                                                                                                                                                                                                                                                                                                                                                                                                                                                                                                                                                                                                                                                                                                                                                                                                                                                                                                                                                                                                                                                                                                                                                                                                                                                                                                                                                                                                                                                                                                                                                                                                                                                                                                                                                                                                                                                                                                                                                                                                                                                                                                                                                                                                                                                                                                                                                                                                                                                                                                                                                                                                                                                                                                                                                                                                                                                                                                                                                                                                                                                                                                                                                                                                                                                                                                                                                                                                                                                                                                                                                                                                                                                                                                                                                                                                                                                                                                                                                                                                                                                                                                                                                                                                                                                                                                                                                                                                                                                                                                                                                                                                                                                                                                                                                                                                                                                                                                                                                                                                                                                                                                                                                                                                                                                                                                                                                                                                                                                                                                                                                                                                                                                                                                                                                                                                                                                                                                                                                                                                                                                                                                                                                                                                                                                                                                                                                                                                                                                                                                                                                                                                                                                                                                                                                                                                                                                                                                                                                                                                                                                                                                                                                                                                                                                                                                                                                                                                                                                                                                                                                                                                                                                                                                                                                                                                                                                                                                                                                                                                                                                                                                                                                                                                                                                                                                                                                                                                                                                                                                                                                                                                                                                                                                                                                                                                                                                                                                                                                                                                                                                                                                                                                                                                                                                                                                                                                                                                                                                                                                                                                                                                                                                                                                                                                                                                                                                                                                                                                                                                                                                                                                                                                                                                                                                                                                                                                                                                                                                                                                                                                                                                                                                                                                                                                                                                                                                                                                                                                                                                                                                                                                                                                                                                                                                                                                                                                                                                                                                                                                                                                                                                                                                                                                                                                                                                                                                                                                                                                                                                                                                                                                                                                                                                                                                                     | Leids Universitair Medisch Centrum                                          | Leiden University Medical Center                                                             | Stefan Boers                                                                                                                                                                                                                                                                                                                                                                                                                                                                                                                                                                                                                                                                                                                                                                                                                                                                                                                                                                                                                                                                      |
| EPI_ISL_9165816,<br>EPI_ISL_9165818,<br>EPI_ISL_9165822,<br>EPI_ISL_9165823,<br>EPI_ISL_9165824,<br>EPI_ISL_9165825,<br>EPI_ISL_9165826,<br>EPI_ISL_9165827,<br>EPI_ISL_9165828,<br>EPI_ISL_9165830,<br>EPI_ISL_9165832,<br>EPI_ISL_9165837,<br>EPI_ISL_9165838,<br>EPI_ISL_9165840,<br>EPI_ISL_9165841,<br>EPI_ISL_9165845,<br>EPI_ISL_9165847,<br>EPI_ISL_9165852,<br>EPI_ISL_9165854,<br>EPI_ISL_9165855,<br>EPI_ISL_9165856,<br>EPI_ISL_9165857,<br>EPI_ISL_9165858,<br>EPI_ISL_9165859,<br>EPI_ISL_9165862,<br>EPI_ISL_9165864,<br>EPI_ISL_9165865,<br>EPI_ISL_9165866,<br>EPI_ISL_9165870,<br>EPI_ISL_9165872,<br>EPI_ISL_9165877,<br>EPI_ISL_9165878,<br>EPI_ISL_9165880,<br>EPI_ISL_9165881,<br>EPI_ISL_9165882,<br>EPI_ISL_9165883,<br>EPI_ISL_9165884,<br>EPI_ISL_9165885,<br>EPI_ISL_9165886,<br>EPI_ISL_9165887,<br>EPI_ISL_9165888,<br>EPI_ISL_9165889,<br>EPI_ISL_9165890,<br>EPI_ISL_9165901,<br>EPI_ISL_9165902,<br>EPI_ISL_9321624,<br>EPI_ISL_9321625,<br>EPI_ISL_9321627,<br>EPI_ISL_9321630,<br>EPI_ISL_9321632,<br>EPI_ISL_9321633,<br>EPI_ISL_9321634,<br>EPI_ISL_9321635,<br>EPI_ISL_9321637,<br>EPI_ISL_9321638,<br>EPI_ISL_9321639,<br>EPI_ISL_9321643,<br>EPI_ISL_9321647,<br>EPI_ISL_9321648,<br>EPI_ISL_9321651,<br>EPI_ISL_9321653,<br>EPI_ISL_9321657,<br>EPI_ISL_9321659,<br>EPI_ISL_9321661,<br>EPI_ISL_9321662,<br>EPI_ISL_9321664,<br>EPI_ISL_9321665,<br>EPI_ISL_9321672,<br>EPI_ISL_9321675,<br>EPI_ISL_9321678,<br>EPI_ISL_9321683,<br>EPI_ISL_9321685,<br>EPI_ISL_9321686,<br>EPI_ISL_9321689,<br>EPI_ISL_9321691,<br>EPI_ISL_9321692,<br>EPI_ISL_9321693,<br>EPI_ISL_9321694,<br>EPI_ISL_9321696,<br>EPI_ISL_9321698,<br>EPI_ISL_9321699,<br>EPI_ISL_9321700,<br>EPI_ISL_9321701,<br>EPI_ISL_9321702,<br>EPI_ISL_9321704,<br>EPI_ISL_9321705,<br>EPI_ISL_9321707,<br>EPI_ISL_9321709,<br>EPI_ISL_9321713,<br>EPI_ISL_9321715,<br>EPI_ISL_9321717,<br>EPI_ISL_9321719,<br>EPI_ISL_9321720,<br>EPI_ISL_9321721,<br>EPI_ISL_9321722,<br>EPI_ISL_9321723,<br>EPI_ISL_9321724,<br>EPI_ISL_9321725,<br>EPI_ISL_9321726,<br>EPI_ISL_9321727,<br>EPI_ISL_9321728,<br>EPI_ISL_9321729,<br>EPI_ISL_9321730,<br>EPI_ISL_9321731,<br>EPI_ISL_9321732,<br>EPI_ISL_9321733,<br>EPI_ISL_9321734,<br>EPI_ISL_9321735,<br>EPI_ISL_9321736,<br>EPI_ISL_9321737,<br>EPI_ISL_9321738,<br>EPI_ISL_9321739,<br>EPI_ISL_9321740,<br>EPI_ISL_9321741,<br>EPI_ISL_9321742,<br>EPI_ISL_9321743,<br>EPI_ISL_9321744,<br>EPI_ISL_9321745,<br>EPI_ISL_9321746,<br>EPI_ISL_9321747,<br>EPI_ISL_9321748,<br>EPI_ISL_9321749,<br>EPI_ISL_9321750,<br>EPI_ISL_9321751,<br>EPI_ISL_9321752,<br>EPI_ISL_9321753,<br>EPI_ISL_9321754,<br>EPI_ISL_9321755,<br>EPI_ISL_9321756,<br>EPI_ISL_9321757,<br>EPI_ISL_9321758,<br>EPI_ISL_9321759,<br>EPI_ISL_9321760,<br>EPI_ISL_9321761,<br>EPI_ISL_9321762,<br>EPI_ISL_9321763,<br>EPI_ISL_9321764,<br>EPI_ISL_9321765,<br>EPI_ISL_9321766,<br>EPI_ISL_9321767,<br>EPI_ISL_9321768,<br>EPI_ISL_9321769,<br>EPI_ISL_9321770,<br>EPI_ISL_9321771,<br>EPI_ISL_9321772,<br>EPI_ISL_9321773,<br>EPI_ISL_9321774,<br>EPI_ISL_9321775,<br>EPI_ISL_9321776,<br>EPI_ISL_9321777,<br>EPI_ISL_9321778,<br>EPI_ISL_9321779,<br>EPI_ISL_9321780,<br>EPI_ISL_9321781,<br>EPI_ISL_9321782,<br>EPI_ISL_9321783,<br>EPI_ISL_9321784,<br>EPI_ISL_9321785,<br>EPI_ISL_9321786,<br>EPI_ISL_9321787,<br>EPI_ISL_9321788,<br>EPI_ISL_9321789,<br>EPI_ISL_9321790,<br>EPI_ISL_9321791,<br>EPI_ISL_9321792,<br>EPI_ISL_9321793,<br>EPI_ISL_9321794,<br>EPI_ISL_9321795,<br>EPI_ISL_9321796,<br>EPI_ISL_9321797,<br>EPI_ISL_9321798,<br>EPI_ISL_9321799,<br>EPI_ISL_9321800,<br>EPI_ISL_9321801,<br>EPI_ISL_9321802,<br>EPI_ISL_9321803,<br>EPI_ISL_9321804,<br>EPI_ISL_9321805,<br>EPI_ISL_9321806,<br>EPI_ISL_9321807,<br>EPI_ISL_9321808,<br>EPI_ISL_9321809,<br>EPI_ISL_9321810,<br>EPI_ISL_9321811,<br>EPI_ISL_9321812,<br>EPI_ISL_9321813,<br>EPI_ISL_9321814,<br>EPI_ISL_9321815,<br>EPI_ISL_9321816,<br>EPI_ISL_9321817,<br>EPI_ISL_9321818,<br>EPI_ISL_9321819,<br>EPI_ISL_9321820,<br>EPI_ISL_9321821,<br>EPI_ISL_9321822,<br>EPI_ISL_9321823,<br>EPI_ISL_9321824,<br>EPI_ISL_9321825,<br>EPI_ISL_9321826,<br>EPI_ISL_9321827,<br>EPI_ISL_9321828,<br>EPI_ISL_9321829,<br>EPI_ISL_9321830,<br>EPI_ISL_9321831,<br>EPI_ISL_9321832,<br>EPI_ISL_9321833,<br>EPI_ISL_9321834,<br>EPI_ISL_9321835,<br>EPI_ISL_9321836,<br>EPI_ISL_9321837,<br>EPI_ISL_9321838,<br>EPI_ISL_9321839,<br>EPI_ISL_9321840,<br>EPI_ISL_9321841,<br>EPI_ISL_9321842,<br>EPI_ISL_9321843,<br>EPI_ISL_9321844,<br>EPI_ISL_9321845,<br>EPI_ISL_9321846,<br>EPI_ISL_9321847,<br>EPI_ISL_9321848,<br>EPI_ISL_9321849,<br>EPI_ISL_9321850,<br>EPI_ISL_9321851,<br>EPI_ISL_9321852,<br>EPI_ISL_9321853,<br>EPI_ISL_9321854,<br>EPI_ISL_9321855,<br>EPI_ISL_9321856,<br>EPI_ISL_9321857,<br>EPI_ISL_9321858,<br>EPI_ISL_9321859,<br>EPI_ISL_9321860,<br>EPI_ISL_9321861,<br>EPI_ISL_9321862,<br>EPI_ISL_9321863,<br>EPI_ISL_9321864,<br>EPI_ISL_9321865,<br>EPI_ISL_9321866,<br>EPI_ISL_9321867,<br>EPI_ISL_9321868,<br>EPI_ISL_9321869,<br>EPI_ISL_9321870,<br>EPI_ISL_9321871,<br>EPI_ISL_9321872,<br>EPI_ISL_9321873,<br>EPI_ISL_9321874,<br>EPI_ISL_9321875,<br>EPI_ISL_9321876,<br>EPI_ISL_9321877,<br>EPI_ISL_9321878,<br>EPI_ISL_9321879,<br>EPI_ISL_9321880,<br>EPI_ISL_9321881,<br>EPI_ISL_9321882,<br>EPI_ISL_9321883,<br>EPI_ISL_9321884,<br>EPI_ISL_9321885,<br>EPI_ISL_9321886,<br>EPI_ISL_9321887,<br>EPI_ISL_9321888,<br>EPI_ISL_9321889,<br>EPI_ISL_9321890,<br>EPI_ISL_9321891,<br>EPI_ISL_9321892,<br>EPI_ISL_9321893,<br>EPI_ISL_9321894,<br>EPI_ISL_9321895,<br>EPI_ISL_9321896,<br>EPI_ISL_9321897,<br>EPI_ISL_9321898,<br>EPI_ISL_9321899,<br>EPI_ISL_9321900,<br>EPI_ISL_9321901,<br>EPI_ISL_9321902,<br>EPI_ISL_9321903,<br>EPI_ISL_9321904,<br>EPI_ISL_9321905,<br>EPI_ISL_9321906,<br>EPI_ISL_9321907,<br>EPI_ISL_9321908,<br>EPI_ISL_9321909,<br>EPI_ISL_9321910,<br>EPI_ISL_9321911,<br>EPI_ISL_9321912,<br>EPI_ISL_9321913,<br>EPI_ISL_9321914,<br>EPI_ISL_9321915,<br>EPI_ISL_9321916,<br>EPI_ISL_9321917,<br>EPI_ISL_9321918,<br>EPI_ISL_9321919,<br>EPI_ISL_9321920,<br>EPI_ISL_9321921,<br>EPI_ISL_9321922,<br>EPI_ISL_9321923,<br>EPI_ISL_9321924,<br>EPI_ISL_9321925,<br>EPI_ISL_9321926,<br>EPI_ISL_9321927,<br>EPI_ISL_9321928,<br>EPI_ISL_9321929,<br>EPI_ISL_9321930,<br>EPI_ISL_9321931,<br>EPI_ISL_9321932,<br>EPI_ISL_9321933,<br>EPI_ISL_9321934,<br>EPI_ISL_9321935,<br>EPI_ISL_9321936,<br>EPI_ISL_9321937,<br>EPI_ISL_9321938,<br>EPI_ISL_9321939,<br>EPI_ISL_9321940,<br>EPI_ISL_9321941,<br>EPI_ISL_9321942,<br>EPI_ISL_9321943,<br>EPI_ISL_9321944,<br>EPI_ISL_9321945,<br>EPI_ISL_9321946,<br>EPI_ISL_9321947,<br>EPI_ISL_9321948,<br>EPI_ISL_9321949,<br>EPI_ISL_9321950,<br>EPI_ISL_9321951,<br>EPI_ISL_9321952,<br>EPI_ISL_9321953,<br>EPI_ISL_9321954,<br>EPI_ISL_9321955,<br>EPI_ISL_9321956,<br>EPI_ISL_9321957,<br>EPI_ISL_9321958,<br>EPI_ISL_9321959,<br>EPI_ISL_9321960,<br>EPI_ISL_9321961,<br>EPI_ISL_9321962,<br>EPI_ISL_9321963,<br>EPI_ISL_9321964,<br>EPI_ISL_9321965,<br>EPI_ISL_9321966,<br>EPI_ISL_9321967,<br>EPI_ISL_9321968,<br>EPI_ISL_9321969,<br>EPI_ISL_9321970,<br>EPI_ISL_9321971,<br>EPI_ISL_9321972,<br>EPI_ISL_9321973,<br>EPI_ISL_9321974,<br>EPI_ISL_9321975,<br>EPI_ISL_9321976,<br>EPI_ISL_9321977,<br>EPI_ISL_9321978,<br>EPI_ISL_9321979,<br>EPI_ISL_9321980,<br>EPI_ISL_9321981,<br>EPI_ISL_9321982,<br>EPI_ISL_9321983,<br>EPI_ISL_9321984,<br>EPI_ISL_9321985,<br>EPI_ISL_9321986,<br>EPI_ISL_9321987,<br>EPI_ISL_9321988,<br>EPI_ISL_9321989,<br>EPI_ISL_9321990,<br>EPI_ISL_9321991,<br>EPI_ISL_9321992,<br>EPI_ISL_9321993,<br>EPI_ISL_9321994,<br>EPI_ISL_9321995,<br>EPI_ISL_9321996,<br>EPI_ISL_9321997,<br>EPI_ISL_9321998,<br>EPI_ISL_9321999,<br>EPI_ISL_9322000,<br>EPI_ISL_9322001,<br>EPI_ISL_9322002,<br>EPI_ISL_9322003,<br>EPI_ISL_9322004,<br>EPI_ISL_9322005,<br>EPI_ISL_9322006,<br>EPI_ISL_9322007,<br>EPI_ISL_9322008,<br>EPI_ISL_9322009,<br>EPI_ISL_9322010,<br>EPI_ISL_9322011,<br>EPI_ISL_9322012,<br>EPI_ISL_9322013,<br>EPI_ISL_9322014,<br>EPI_ISL_9322015,<br>EPI_ISL_9322016,<br>EPI_ISL_9322017,<br>EPI_ISL_9322018,<br>EPI_ISL_9322019,<br>EPI_ISL_9322020,<br>EPI_ISL_9322021,<br>EPI_ISL_9322022,<br>EPI_ISL_9322023,<br>EPI_ISL_9322024,<br>EPI_ISL_9322025,<br>EPI_ISL_9322026,<br>EPI_ISL_9322027,<br>EPI_ISL_9322028,<br>EPI_ISL_9322029,<br>EPI_ISL_9322030,<br>EPI_ISL_9322031,<br>EPI_ISL_9322032,<br>EPI_ISL_9322033,<br>EPI_ISL_9322034,<br>EPI_ISL_9322035,<br>EPI_ISL_9322036,<br>EPI_ISL_9322037,<br>EPI_ISL_9322038,<br>EPI_ISL_9322039,<br>EPI_ISL_9322040,<br>EPI_ISL_9322041,<br>EPI_ISL_9322042,<br>EPI_ISL_9322043,<br>EPI_ISL_9322044,<br>EPI_ISL_9322045,<br>EPI_ISL_9322046,<br>EPI_ISL_9322047,<br>EPI_ISL_9322048,<br>EPI_ISL_9322049,<br>EPI_ISL_9322050,<br>EPI_ISL_9322051,<br>EPI_ISL_9322052,<br>EPI_ISL_9322053,<br>EPI_ISL_9322054,<br>EPI_ISL_9322055,<br>EPI_ISL_9322056,<br>EPI_ISL_9322057,<br>EPI_ISL_9322058,<br>EPI_ISL_9322059,<br>EPI_ISL_9322060,<br>EPI_ISL_9322061,<br>EPI_ISL_9322062,<br>EPI_ISL_9322063,<br>EPI_ISL_9322064,<br>EPI_ISL_9322065,<br>EPI_ISL_9322066,<br>EPI_ISL_9322067,<br>EPI_ISL_9322068,<br>EPI_ISL_9322069,<br>EPI_ISL_9322070,<br>EPI_ISL_9322071,<br>EPI_ISL_9322072,<br>EPI_ISL_9322073,<br>EPI_ISL_9322074,<br>EPI_ISL_9322075,<br>EPI_ISL_9322076,<br>EPI_ISL_9322077,<br>EPI_ISL_9322078,<br>EPI_ISL_9322079,<br>EPI_ISL_9322080,<br>EPI_ISL_9322081,<br>EPI_ISL_9322082,<br>EPI_ISL_9322083,<br>EPI_ISL_9322084,<br>EPI_ISL_9322085,<br>EPI_ISL_9322086,<br>EPI_ISL_9322087,<br>EPI_ISL_9322088,<br>EPI_ISL_9322089,<br>EPI_ISL_9322090,<br>EPI_ISL_9322091,<br>EPI_ISL_9322092,<br>EPI_ISL_9322093,<br>EPI_ISL_9322094,<br>EPI_ISL_9322095,<br>EPI_ISL_9322096,<br>EPI_ISL_9322097,<br>EPI_ISL_9322098,<br>EPI_ISL_9322099,<br>EPI_ISL_9322100,<br>EPI_ISL_9322101,<br>EPI_ISL_9322102,<br>EPI_ISL_9322103,<br>EPI_ISL_9322104,<br>EPI_ISL_9322105,<br>EPI_ISL_9322106,<br>EPI_ISL_9322107,<br>EPI_ISL_9322108,<br>EPI_ISL_9322109,<br>EPI_ISL_9322110,<br>EPI_ISL_9322111,<br>EPI_ISL_9322112,<br>EPI_ISL_9322113,<br>EPI_ISL_9322114,<br>EPI_ISL_9322115,<br>EPI_ISL_9322116,<br>EPI_ISL_9322117,<br>EPI_ISL_9322118,<br>EPI_ISL_9322119,<br>EPI_ISL_9322120,<br>EPI_ISL_9322121,<br>EPI_ISL_9322122,<br>EPI_ISL_9322123,<br>EPI_ISL_9322124,<br>EPI_ISL_9322125,<br>EPI_ISL_9322126,<br>EPI_ISL_9322127,<br>EPI_ISL_9322128,<br>EPI_ISL_9322129,<br>EPI_ISL_9322130,<br>EPI_ISL_9322131,<br>EPI_ISL_9322132,<br>EPI_ISL_9322133,<br>EPI_ISL_9322134,<br>EPI_ISL_9322135,<br>EPI_ISL_9322136,<br>EPI_ISL_9322137,<br>EPI_ISL_9322138,<br>EPI_ISL_9322139,<br>EPI_ISL_9322140,<br>EPI_ISL_9322141,<br>EPI_ISL_9322142,<br>EPI_ISL_9322143,<br>EPI_ISL_9322144,<br>EPI_ISL_9322145,<br>EPI_ISL_9322146,<br>EPI_ISL_9322147,<br>EPI_ISL_9322148,<br>EPI_ISL_9322149,<br>EPI_ISL_9322150,<br>EPI_ISL_9322151,<br>EPI_ISL_9322152,<br>EPI_ISL_9322153,<br>EPI_ISL_9322154,<br>EPI_ISL_9322155,<br>EPI_ISL_9322156,<br>EPI_ISL_9322157,<br>EPI_ISL_9322158,<br>EPI_ISL_9322159,<br>EPI_ISL_9322160,<br>EPI_ISL_9322161,<br>EPI_ISL_9322162,<br>EPI_ISL_9322163,<br>EPI_ISL_9322164,<br>EPI_ISL_9322165,<br>EPI_ISL_9322166,<br>EPI_ISL_9322167,<br>EPI_ISL_9322168,<br>EPI_ISL_9322169,<br>EPI_ISL_9322170,<br>EPI_ISL_9322171,<br>EPI_ISL_9322172,<br>EPI_ISL_9322173,<br>EPI_ISL_9322174,<br>EPI_ISL_9322175,<br>EPI_ISL_9322176,<br>EPI_ISL_9322177,<br>EPI_ISL_9322178,<br>EPI_ISL_9322179,<br>EPI_ISL_9322180,<br>EPI_ISL_9322181,<br>EPI_ISL_9322182,<br>EPI_ISL_9322183,<br>EPI_ISL_9322184,<br>EPI_ISL_9322185,<br>EPI_ISL_9322186,<br>EPI_ISL_9322187,<br>EPI_ISL_9322188,<br>EPI_ISL_9322189,<br>EPI_ISL_9322190,<br>EPI_ISL_9322191,<br>EPI_ISL_9322192,<br>EPI_ISL_9322193,<br>EPI_ISL_9322194,<br>EPI_ISL_9322195,<br>EPI_ISL_9322196,<br>EPI_ISL_9322197,<br>EPI_ISL_9322198,<br>EPI_ISL_9322199,<br>EPI_ISL_9322200,<br>EPI_ISL_9322201,<br>EPI_ISL_9322202,<br>EPI_ISL_9322203,<br>EPI_ISL_9322204,<br>EPI_ISL_9322205,<br>EPI_ISL_9322206,<br>EPI_ISL_9322207,<br>EPI_ISL_9322208,<br>EPI_ISL_9322209,<br>EPI_ISL_9322210,<br>EPI_ISL_9322211,<br>EPI_ISL_9322212,<br>EPI_ISL_9322213,<br>EPI_ISL_9322214,<br>EPI_ISL_9322215,<br>EPI_ISL_9322216,<br>EPI_ISL_9322217,<br>EPI_ISL_9322218,<br>EPI_ISL_9322219,<br>EPI_ISL_9322220,<br>EPI_ISL_9322221,<br>EPI_ISL_9322222,<br>EPI_ISL_9322223,<br>EPI_ISL_9322224,<br>EPI_ISL_9322225,<br>EPI_ISL_9322226,<br>EPI_ISL_9322227,<br>EPI_ISL_9322228,<br>EPI_ISL_9322229,<br>EPI_ISL_9322230,<br>EPI_ISL_9322231,<br>EPI_ISL_9322232,<br>EPI_ISL_9322233,<br>EPI_ISL_9322234,<br>EPI_ISL_9322235,<br>EPI_ISL_9322236,<br>EPI_ISL_9322237,<br>EPI_ISL_9322238,<br>EPI_ISL_9322239,<br>EPI_ISL_9322240,<br>EPI_ISL_9322241,<br>EPI_ISL_9322242,<br>EPI_ISL_9322243,<br>EPI_ISL_9322244,<br>EPI_ISL_9322245,<br>EPI_ISL_9322246,<br>EPI_ISL_9322247,<br>EPI_ISL_9322248,<br>EPI_ISL_9322249,<br>EPI_ISL_9322250,<br>EPI_ISL_9322251,<br>EPI_ISL_9322252,<br>EPI_ISL_9322253,<br>EPI_ISL_9322254,<br>EPI_ISL_9322255,<br>EPI_ISL_9322256,<br>EPI_ISL_9322257,<br>EPI_ISL_9322258,<br>EPI_ISL_9322259,<br>EPI_ISL_9322260,<br>EPI_ISL_9322261,<br>EPI_ISL_9322262,<br>EPI_ISL_9322263,<br>EPI_ISL_9322264,<br>EPI_ISL_9322265,<br>EPI_ISL_9322266,<br>EPI_ISL_9322267,<br>EPI_ISL_9322268,<br>EPI_ISL_9322269,<br>EPI_ISL_9322270,<br>EPI_ISL_9322271,<br>EPI_ISL_9322272,<br>EPI_ISL_9322273,<br>EPI_ISL_9322274,<br>EPI_ISL_9322275,<br>EPI_ISL_9322276,<br>EPI_ISL_9322277,<br>EPI_ISL_9322278,<br>EPI_ISL_9322279,<br>EPI_ISL_9322280,<br>EPI_ISL_9322281,<br>EPI_ISL_9322282,<br>EPI_ISL_9322283,<br>EPI_ISL_9322284,<br>EPI_ISL_9322285,<br>EPI_ISL_9322286,<br>EPI_ISL_9322287,<br>EPI_ISL_9322288,<br>EPI_ISL_9322289,<br>EPI_ISL_9322290,<br>EPI_ISL_9322291,<br>EPI_ISL_9322292,<br>EPI_ISL_9322293,<br>EPI_ISL_9322294,<br>EPI_ISL_9322295,<br>EPI_ISL_9322296,<br>EPI_ISL_9322297,<br>EPI_ISL_9322298,<br>EPI_ISL_9322299,<br>EPI_ISL_9322300,<br>EPI_ISL_9322301,<br>EPI_ISL_9322302,<br>EPI_ISL_9322303,<br>EPI_ISL_9322304,<br>EPI_ISL_9322305,<br>EPI_ISL_9322306,<br>EPI_ISL_9322307,<br>EPI_ISL_9322308,<br>EPI_ISL_9322309,<br>EPI_ISL_9322310,<br>EPI_ISL_9322311,<br>EPI_ISL_9322312,<br>EPI_ISL_9322313,<br>EPI_ISL_9322314,<br>EPI_ISL_9322315,<br>EPI_ISL_9322316,<br>EPI_ISL_9322317,<br>EPI_ISL_9322318,<br>EPI_ISL_9322319,<br>EPI_ISL_9322320,<br>EPI_ISL_9322321,<br>EPI_ISL_9322322,<br>EPI_ISL_9322323,<br>EPI_ISL_9322324,<br>EPI_ISL_9322325,<br>EPI_ISL_9322326,<br>EPI_ISL_9322327,<br>EPI_ISL_9322328,<br>EPI_ISL_9322329,<br>EPI_ISL_9322330,<br>EPI_ISL_9322331,<br>EPI_ISL_9322332,<br>EPI_ISL_9322333,<br>EPI_ISL_9322334,<br>EPI_ISL_9322335,<br>EPI_ISL_9322336,<br>EPI_ISL_9322337,<br>EPI_ISL_9322338,<br>EPI_ISL_9322339,<br>EPI_ISL_9322340,<br>EPI_ISL_9322341,<br>EPI_ISL_9322342,<br>EPI_ISL_9322343,<br>EPI_ISL_9322344,<br>EPI_ISL_9322345,<br>EPI_ISL_9322346,<br>EPI_ISL_9322347,<br>EPI_ISL_9322348,<br>EPI_ISL_9322349,<br>EPI_ISL_9322350,<br>EPI_ISL_9322351,<br>EPI_ISL_9322352,<br>EPI_ISL_9322353,<br>EPI_ISL_9322354,<br>EPI_ISL_9322355,<br>EPI_ISL_9322356,<br>EPI_ISL_9322357,<br>EPI_ISL_9322358,<br>EPI_ISL_9322359,<br>EPI_ISL_9322360,<br>EPI_ISL_9322361,<br>EPI_ISL_9322362,<br>EPI_ISL_9322363,<br>EPI_ISL_9322364,<br>EPI_ISL_9322365,<br>EPI_ISL_9322366,<br>EPI_ISL_9322367,<br>EPI_ISL_9322368,<br>EPI_ISL_9322369,<br>EPI_ISL_9322370,<br>EPI_ISL_9322371,<br>EPI_ISL_9322372,<br>EPI_ISL_9322373,<br>EPI_ISL_9322374,<br>EPI_ISL_9322375,<br>EPI_ISL_9322376,<br>EPI_ISL_9322377,<br>EPI_ISL_9322378,<br>EPI_ISL_9322379,<br>EPI_ISL_9322380,<br>EPI_ISL_9322381,<br>EPI_ISL_9322382,<br>EPI |                                                                             |                                                                                              |                                                                                                                                                                                                                                                                                                                                                                                                                                                                                                                                                                                                                                                                                                                                                                                                                                                                                                                                                                                                                                                                                   |

| Oswald-Kettermann & Kollegen                                                                                                                                                                                                                                                                                                                                                                                                                                                                                                                                                                                                                                                                                                                                                                                                                                                                                                                                                                                                                                                                                                                                                                                                                                                                                                                                                                                                                                                                                                                                                                                                                                                                                                                                      |                                                                                                            |                                                                                                                                                                                                                    |                                                                                                                                                                                                                                                                                                                                                                                                                                                                                                                                                                                                                                                                                                         |
|-------------------------------------------------------------------------------------------------------------------------------------------------------------------------------------------------------------------------------------------------------------------------------------------------------------------------------------------------------------------------------------------------------------------------------------------------------------------------------------------------------------------------------------------------------------------------------------------------------------------------------------------------------------------------------------------------------------------------------------------------------------------------------------------------------------------------------------------------------------------------------------------------------------------------------------------------------------------------------------------------------------------------------------------------------------------------------------------------------------------------------------------------------------------------------------------------------------------------------------------------------------------------------------------------------------------------------------------------------------------------------------------------------------------------------------------------------------------------------------------------------------------------------------------------------------------------------------------------------------------------------------------------------------------------------------------------------------------------------------------------------------------|------------------------------------------------------------------------------------------------------------|--------------------------------------------------------------------------------------------------------------------------------------------------------------------------------------------------------------------|---------------------------------------------------------------------------------------------------------------------------------------------------------------------------------------------------------------------------------------------------------------------------------------------------------------------------------------------------------------------------------------------------------------------------------------------------------------------------------------------------------------------------------------------------------------------------------------------------------------------------------------------------------------------------------------------------------|
| EPI_ISL_9402820                                                                                                                                                                                                                                                                                                                                                                                                                                                                                                                                                                                                                                                                                                                                                                                                                                                                                                                                                                                                                                                                                                                                                                                                                                                                                                                                                                                                                                                                                                                                                                                                                                                                                                                                                   | M.P.Shah Government Medical College, Jamnagar                                                              | Gujarat Biotechnology Research Centre                                                                                                                                                                              | Akhilesh Modi; Apurvashin Puvav; Bhadreshsinh Gohil; Binita; Chaitanya Joshi; Disha Vora; Janvi Raval; Jaykumar Rangani; Madhvi Joshi; Nimesh Patel; Nitin Savaliya; NitinShukla; Priyank Chavda; Ramesh Pandit; Roshani Mishra; Sonal Sharma; Tasnim Trivedi; Zarna Patel                                                                                                                                                                                                                                                                                                                                                                                                                              |
| EPI_ISL_9448828, EPI_ISL_9448831, EPI_ISL_9458273, EPI_ISL_9458601, EPI_ISL_9459225, EPI_ISL_9459244                                                                                                                                                                                                                                                                                                                                                                                                                                                                                                                                                                                                                                                                                                                                                                                                                                                                                                                                                                                                                                                                                                                                                                                                                                                                                                                                                                                                                                                                                                                                                                                                                                                              | MDI Limbach Berlin GmbH; MVZ Labor Berlin                                                                  | Robert Koch Institute                                                                                                                                                                                              |                                                                                                                                                                                                                                                                                                                                                                                                                                                                                                                                                                                                                                                                                                         |
| EPI_ISL_9461880, EPI_ISL_9462498, EPI_ISL_9462572, EPI_ISL_9462916                                                                                                                                                                                                                                                                                                                                                                                                                                                                                                                                                                                                                                                                                                                                                                                                                                                                                                                                                                                                                                                                                                                                                                                                                                                                                                                                                                                                                                                                                                                                                                                                                                                                                                | MVZ Dr. Eberhard & Partner Dortmund                                                                        | Robert Koch Institute                                                                                                                                                                                              |                                                                                                                                                                                                                                                                                                                                                                                                                                                                                                                                                                                                                                                                                                         |
| EPI_ISL_9458984, EPI_ISL_9718916, EPI_ISL_9719024                                                                                                                                                                                                                                                                                                                                                                                                                                                                                                                                                                                                                                                                                                                                                                                                                                                                                                                                                                                                                                                                                                                                                                                                                                                                                                                                                                                                                                                                                                                                                                                                                                                                                                                 | MVZ Labor Dr. Fenner und Kollegen (Standort Hamburg)                                                       | Robert Koch Institute                                                                                                                                                                                              |                                                                                                                                                                                                                                                                                                                                                                                                                                                                                                                                                                                                                                                                                                         |
| EPI_ISL_9445143, EPI_ISL_9447999, EPI_ISL_9456334, EPI_ISL_9457072, EPI_ISL_9458215, EPI_ISL_9458251, EPI_ISL_9458301, EPI_ISL_9458332, EPI_ISL_9458346, EPI_ISL_9459177, EPI_ISL_9459255, EPI_ISL_9459379, EPI_ISL_9459381, EPI_ISL_9716554, EPI_ISL_9718784, EPI_ISL_9718795                                                                                                                                                                                                                                                                                                                                                                                                                                                                                                                                                                                                                                                                                                                                                                                                                                                                                                                                                                                                                                                                                                                                                                                                                                                                                                                                                                                                                                                                                    | see above                                                                                                  | MVZ Labor Dr. Limbach & Kollegen GbR                                                                                                                                                                               | Robert Koch Institute                                                                                                                                                                                                                                                                                                                                                                                                                                                                                                                                                                                                                                                                                   |
| EPI_ISL_9459362, EPI_ISL_9723552                                                                                                                                                                                                                                                                                                                                                                                                                                                                                                                                                                                                                                                                                                                                                                                                                                                                                                                                                                                                                                                                                                                                                                                                                                                                                                                                                                                                                                                                                                                                                                                                                                                                                                                                  | MVZ Labor Dr. Reising-Ackermann und Kollegen                                                               | Robert Koch Institute                                                                                                                                                                                              |                                                                                                                                                                                                                                                                                                                                                                                                                                                                                                                                                                                                                                                                                                         |
| EPI_ISL_9455238, EPI_ISL_9455274, EPI_ISL_9455305, EPI_ISL_9455324, EPI_ISL_9455355, EPI_ISL_9455357                                                                                                                                                                                                                                                                                                                                                                                                                                                                                                                                                                                                                                                                                                                                                                                                                                                                                                                                                                                                                                                                                                                                                                                                                                                                                                                                                                                                                                                                                                                                                                                                                                                              | MVZ Labor Krone GbR                                                                                        | Robert Koch Institute                                                                                                                                                                                              |                                                                                                                                                                                                                                                                                                                                                                                                                                                                                                                                                                                                                                                                                                         |
| EPI_ISL_9461205, EPI_ISL_9461207                                                                                                                                                                                                                                                                                                                                                                                                                                                                                                                                                                                                                                                                                                                                                                                                                                                                                                                                                                                                                                                                                                                                                                                                                                                                                                                                                                                                                                                                                                                                                                                                                                                                                                                                  | MVZ Medizinische Labore Dessau Kassel GmbH                                                                 | Robert Koch Institute                                                                                                                                                                                              |                                                                                                                                                                                                                                                                                                                                                                                                                                                                                                                                                                                                                                                                                                         |
| EPI_ISL_9446596, EPI_ISL_9446610, EPI_ISL_9446624, EPI_ISL_9458425, EPI_ISL_9716688, EPI_ISL_9716700, EPI_ISL_9716731, EPI_ISL_9716732, EPI_ISL_9716761                                                                                                                                                                                                                                                                                                                                                                                                                                                                                                                                                                                                                                                                                                                                                                                                                                                                                                                                                                                                                                                                                                                                                                                                                                                                                                                                                                                                                                                                                                                                                                                                           | see above                                                                                                  | MVZ für Laboratoriumsmedizin und Mikrobiologie Koblenz-Mittelrhein (Labor Koblenz)                                                                                                                                 | Robert Koch Institute                                                                                                                                                                                                                                                                                                                                                                                                                                                                                                                                                                                                                                                                                   |
| EPI_ISL_9498964                                                                                                                                                                                                                                                                                                                                                                                                                                                                                                                                                                                                                                                                                                                                                                                                                                                                                                                                                                                                                                                                                                                                                                                                                                                                                                                                                                                                                                                                                                                                                                                                                                                                                                                                                   | MakLab Laboratorium Diagnostyczne                                                                          | Wojewodzka Stacja Sanitarno-Epidemiologiczna w Rzeszowie, Laboratorium Diagnostyki Medycznej                                                                                                                       | Anna Nowakowska; Karolina Ostrowska; Katarzyna Wilk; Marzena Baranowska                                                                                                                                                                                                                                                                                                                                                                                                                                                                                                                                                                                                                                 |
| EPI_ISL_9525518, EPI_ISL_9525529, EPI_ISL_9525530, EPI_ISL_9525531, EPI_ISL_9525532                                                                                                                                                                                                                                                                                                                                                                                                                                                                                                                                                                                                                                                                                                                                                                                                                                                                                                                                                                                                                                                                                                                                                                                                                                                                                                                                                                                                                                                                                                                                                                                                                                                                               | Mako Medical                                                                                               | Centers for Disease Control and Prevention Division of Viral Diseases, Pathogen Discovery                                                                                                                          | Benjamin Rambo-Martin; Christopher Gulvick; Clinton Paden; Dakota Howard; Dhvani Batra; Duncan MacCannell; Erlisa Sula; Jason Caravas; Kristine Lacey; Lauren Moon; Matthew Schmerer; Matthew Tugwell; Peter Cook; Scott Sammons; Shatavia Morrison; Tymeckia Kendall; Victoria Caban Figueroa; Yvette Unourumi                                                                                                                                                                                                                                                                                                                                                                                         |
| EPI_ISL_9738885, EPI_ISL_9738887, EPI_ISL_9738889, EPI_ISL_9738890, EPI_ISL_9738893                                                                                                                                                                                                                                                                                                                                                                                                                                                                                                                                                                                                                                                                                                                                                                                                                                                                                                                                                                                                                                                                                                                                                                                                                                                                                                                                                                                                                                                                                                                                                                                                                                                                               | Maldives Police Services Lab                                                                               | Maldives Police Services Lab                                                                                                                                                                                       | D. Fathmath Nazla Rafeeq; Dr. Ibrahim Afzal; Mr. Ibrahim Nishan Ahmed; Ms. Aishath Shuhudha; Ms. Aminath Shaazleena Abdul Rahman; Ms. Soafy Mohamed                                                                                                                                                                                                                                                                                                                                                                                                                                                                                                                                                     |
| EPI_ISL_9343457                                                                                                                                                                                                                                                                                                                                                                                                                                                                                                                                                                                                                                                                                                                                                                                                                                                                                                                                                                                                                                                                                                                                                                                                                                                                                                                                                                                                                                                                                                                                                                                                                                                                                                                                                   | Maryland Genomics, Institute for Genome Sciences, University of Maryland School of Medicine                | Maryland Genomics, Institute for Genome Sciences, University of Maryland School of Medicine                                                                                                                        | Claire M; Fraser; George; Hazen; Holly; Humphrys; Jacques; Jain; Kevin; Kranthi; Lisa D; Luke J; Mike; Ott; Ravel; Regan; Roussey; Sadzewicz; Sandra; Tallon; Tracy; Vavikolanu                                                                                                                                                                                                                                                                                                                                                                                                                                                                                                                         |
| EPI_ISL_9747181                                                                                                                                                                                                                                                                                                                                                                                                                                                                                                                                                                                                                                                                                                                                                                                                                                                                                                                                                                                                                                                                                                                                                                                                                                                                                                                                                                                                                                                                                                                                                                                                                                                                                                                                                   | Medical Microbiology Unit, Department for Laboratory Medicine, Drammen Hospital, Vestre Viken Health Trust | Norwegian Institute of Public Health, Department of Virology                                                                                                                                                       | Atiya R Ali; Debec Nadia; Engebretsen Serina Beate; Garcia Lorente Ignacio; Hilde Elshaug; Hilde Nordby Falkenhaug; Hilde Volland; Jon Bråte; Kamilla Heddeland Instefjord; Karoline Bragstad; Kathrine Stene-Johansen; Line Victoria Moen; Marie Paulsen Madsen; Olav Hungnes; Pedersen Benedikte Nevjen; Rasmus Riis Kopperud                                                                                                                                                                                                                                                                                                                                                                         |
| EPI_ISL_9740912, EPI_ISL_9445460, EPI_ISL_9456936, EPI_ISL_9456978                                                                                                                                                                                                                                                                                                                                                                                                                                                                                                                                                                                                                                                                                                                                                                                                                                                                                                                                                                                                                                                                                                                                                                                                                                                                                                                                                                                                                                                                                                                                                                                                                                                                                                | Medizinisch-Diagnostisches Labor Kempten allgäulab                                                         | Medizinische Laboratorien Düsseldorf                                                                                                                                                                               | Robert Koch Institute                                                                                                                                                                                                                                                                                                                                                                                                                                                                                                                                                                                                                                                                                   |
| EPI_ISL_9448111                                                                                                                                                                                                                                                                                                                                                                                                                                                                                                                                                                                                                                                                                                                                                                                                                                                                                                                                                                                                                                                                                                                                                                                                                                                                                                                                                                                                                                                                                                                                                                                                                                                                                                                                                   | Medizinisches Labor Ostachsen MVZ GbR Nebenbetriebsstätte Dresden                                          | Medizinisches Labor Wahl Lüdenscheid                                                                                                                                                                               | Robert Koch Institute                                                                                                                                                                                                                                                                                                                                                                                                                                                                                                                                                                                                                                                                                   |
| EPI_ISL_9461806, EPI_ISL_9461861, EPI_ISL_9461872, EPI_ISL_9461890, EPI_ISL_9461901                                                                                                                                                                                                                                                                                                                                                                                                                                                                                                                                                                                                                                                                                                                                                                                                                                                                                                                                                                                                                                                                                                                                                                                                                                                                                                                                                                                                                                                                                                                                                                                                                                                                               | Medizinisches Labor Wah! Lüdenscheid                                                                       | Robert Koch Institute                                                                                                                                                                                              |                                                                                                                                                                                                                                                                                                                                                                                                                                                                                                                                                                                                                                                                                                         |
| EPI_ISL_9376214                                                                                                                                                                                                                                                                                                                                                                                                                                                                                                                                                                                                                                                                                                                                                                                                                                                                                                                                                                                                                                                                                                                                                                                                                                                                                                                                                                                                                                                                                                                                                                                                                                                                                                                                                   | Medyczne Laboratoria Diagnostyczne Invicta Sp.z o.o., ul Polna 64, 81-740 Sopot                            | 1. Tricity SARS-CoV-2 Sequencing consortium: University of Gdansk, Medical University of Gdansk, Vaxican Ltd., Invicta Ltd. 2. National Institute of Public Health - National Institute of Hygiene, Warsaw, Poland | Celina Cybulska; Karolina Gackowska; Katarzyna Groth; Katarzyna Zacharczuk; Krystyna Bienkowska Szewczyk; Lukasz Rabalski; Maciej Grzybek; Maciej Kosinski; Magdalena Nowakowska; Marcin Lubocki; Małgorzata Sadkowska-Todys; Tomasz Woikowicz                                                                                                                                                                                                                                                                                                                                                                                                                                                          |
| EPI_ISL_9302879, EPI_ISL_9767659                                                                                                                                                                                                                                                                                                                                                                                                                                                                                                                                                                                                                                                                                                                                                                                                                                                                                                                                                                                                                                                                                                                                                                                                                                                                                                                                                                                                                                                                                                                                                                                                                                                                                                                                  | Microbiological Diagnostic Unit - Public Health Laboratory (MDU-PHL)                                       | Microbiological Diagnostic Unit - Public Health Laboratory (MDU-PHL)                                                                                                                                               | Horan, K.; N.L.; Seemann, T.; Sherry                                                                                                                                                                                                                                                                                                                                                                                                                                                                                                                                                                                                                                                                    |
| EPI_ISL_9356662                                                                                                                                                                                                                                                                                                                                                                                                                                                                                                                                                                                                                                                                                                                                                                                                                                                                                                                                                                                                                                                                                                                                                                                                                                                                                                                                                                                                                                                                                                                                                                                                                                                                                                                                                   | Microbiology Department - University Hospital Brussel                                                      | Microbiology Department - University Hospital Brussel                                                                                                                                                              | Florence Crombé; Oriane Soetens; Thomas Demuyser                                                                                                                                                                                                                                                                                                                                                                                                                                                                                                                                                                                                                                                        |
| EPI_ISL_9222392, EPI_ISL_9232732, EPI_ISL_9678331                                                                                                                                                                                                                                                                                                                                                                                                                                                                                                                                                                                                                                                                                                                                                                                                                                                                                                                                                                                                                                                                                                                                                                                                                                                                                                                                                                                                                                                                                                                                                                                                                                                                                                                 | Microbiology Department, Laboratori Clinic Metropolitana Nord, Hospital Universitari Germans Trias i Pujol | Can Ruti SARS-CoV-2 Sequencing Hub (HUGTIP/IrsiCaixa/GTP)                                                                                                                                                          | Alexia Paris; Ana Blanco; Andreu Coello; Anna Blanco; Antoni E Bordoy; Bonaventura Clotet; David Panisello; Elisa Martró; Francesc Catala-Moll; Gemma Clara; Ignacio Blanco; Laia Soler; Laura Muntané; Lauro Sumoy; Marc Noguera-Julian; Mercedes Guerrero; Montserrat Giménez; Pere-Joan Cardona; Pilar Armengol; Roger Paredes; Sara González; Verónica Saludes; and Elisa Martró on behalf of the Can Ruti SARS-CoV-2 Sequencing Hub; on behalf of the Can Ruti SARS-CoV-2 Sequencing Hub and Marató de TV3 project (Ref. 202126-30-31) working group.                                                                                                                                              |
| EPI_ISL_9738240, EPI_ISL_9790208, EPI_ISL_9790218                                                                                                                                                                                                                                                                                                                                                                                                                                                                                                                                                                                                                                                                                                                                                                                                                                                                                                                                                                                                                                                                                                                                                                                                                                                                                                                                                                                                                                                                                                                                                                                                                                                                                                                 | Microbiology Department, University Hospital Donostia                                                      | Microbiology Department, University Hospital Donostia                                                                                                                                                              | Cilla G.; Gomez M; Marimon JM; Martin-Peñaranda T; Montes M; Piñeiro L; Sorrairain A                                                                                                                                                                                                                                                                                                                                                                                                                                                                                                                                                                                                                    |
| EPI_ISL_9458026, EPI_ISL_9458046, EPI_ISL_9458102                                                                                                                                                                                                                                                                                                                                                                                                                                                                                                                                                                                                                                                                                                                                                                                                                                                                                                                                                                                                                                                                                                                                                                                                                                                                                                                                                                                                                                                                                                                                                                                                                                                                                                                 | Microvida                                                                                                  | Microvida                                                                                                                                                                                                          | Jaco J. Verweij; Joep J. J. M. Stohr; Suzan D. Pas                                                                                                                                                                                                                                                                                                                                                                                                                                                                                                                                                                                                                                                      |
| EPI_ISL_9434115, EPI_ISL_9434133, EPI_ISL_9434234, EPI_ISL_9636538                                                                                                                                                                                                                                                                                                                                                                                                                                                                                                                                                                                                                                                                                                                                                                                                                                                                                                                                                                                                                                                                                                                                                                                                                                                                                                                                                                                                                                                                                                                                                                                                                                                                                                | Middlemore Hospital                                                                                        | Institute of Environmental Science and Research (ESR)                                                                                                                                                              | Anja Werno; Antje van der Linden; Arlo Upton; Chris Mansell; Clare Gebbie; David Hammer; Dhanisha Patel; Dragana Drinkovic; Erasmus Smit; Gary McAuliffe; Hana Sofia Andersson; Hermes Perez; James Ussher; Jill Sherwood; Jing Wang; Joep de Lig; Josh Freeman; Julia Howard; Juliet Elvy; Lauren Jelly; Mary DeAlmeida; Matt Blakiston; Matt Storey; Matthew Rogers; Max Bloomfield; Michael Addidle; Michelle Balm; Muhammad Faisal; Nikki Freed; Olin Silander; Olivia Stroeven; Rachel Boyle; Sally Roberts; SallyAnn Harbison; Sarah Cockerton; Sarah Jefferies; Sharmini Mutaiyah; Susan Morphet; Susan Taylor; Timothy Blackmore; Vani Sathyendran; Veronica Playle; Virginia Hope; Xiaoyun Ren |
| EPI_ISL_9406302                                                                                                                                                                                                                                                                                                                                                                                                                                                                                                                                                                                                                                                                                                                                                                                                                                                                                                                                                                                                                                                                                                                                                                                                                                                                                                                                                                                                                                                                                                                                                                                                                                                                                                                                                   | Molecular Biology Laboratory, Vidant Medical Center                                                        | Brody Integrative Genomics Core, East Carolina University                                                                                                                                                          | Changhong Yin; Heather Duncan; John T. Fallon; Kimberly P. Briley; Weihua Huang                                                                                                                                                                                                                                                                                                                                                                                                                                                                                                                                                                                                                         |
| EPI_ISL_9268809, EPI_ISL_9268984, EPI_ISL_9269075, EPI_ISL_9269295, EPI_ISL_9269501, EPI_ISL_9269644, EPI_ISL_9269893, EPI_ISL_9270201, EPI_ISL_9270227, EPI_ISL_9270645, EPI_ISL_9270659, EPI_ISL_9270736, EPI_ISL_9271369, EPI_ISL_9271485, EPI_ISL_9271524, EPI_ISL_9271582, EPI_ISL_9358050, EPI_ISL_9358096, EPI_ISL_9358132, EPI_ISL_9358165, EPI_ISL_9358237, EPI_ISL_9358263, EPI_ISL_9358520, EPI_ISL_9358947, EPI_ISL_9359473, EPI_ISL_9359788, EPI_ISL_9359816, EPI_ISL_9359937, EPI_ISL_9359987, EPI_ISL_9360077, EPI_ISL_9360217, EPI_ISL_9360223, EPI_ISL_9362215, EPI_ISL_9362391, EPI_ISL_9362779, EPI_ISL_9362852, EPI_ISL_9362876, EPI_ISL_936324, EPI_ISL_9363448, EPI_ISL_9363469, EPI_ISL_9364002, EPI_ISL_9364033, EPI_ISL_9364061, EPI_ISL_9364383, EPI_ISL_9364702, EPI_ISL_9364956, EPI_ISL_9365571, EPI_ISL_9365716, EPI_ISL_9365723, EPI_ISL_9365806, EPI_ISL_9365847, EPI_ISL_9366084, EPI_ISL_9367174, EPI_ISL_9367286, EPI_ISL_9367359, EPI_ISL_9367378, EPI_ISL_9367491, EPI_ISL_9367599, EPI_ISL_9367831, EPI_ISL_9367863, EPI_ISL_9367869, EPI_ISL_9368007, EPI_ISL_9368077, EPI_ISL_9408688, EPI_ISL_9408793, EPI_ISL_9409123, EPI_ISL_9409196, EPI_ISL_9409286, EPI_ISL_9409409, EPI_ISL_9409948, EPI_ISL_9410012, EPI_ISL_9410025, EPI_ISL_9410161, EPI_ISL_9410225, EPI_ISL_9410240, EPI_ISL_9410257, EPI_ISL_9410263, EPI_ISL_9410335, EPI_ISL_9410364, EPI_ISL_9410446, EPI_ISL_9411056, EPI_ISL_9411099, EPI_ISL_9411129, EPI_ISL_9411136, EPI_ISL_9411164, EPI_ISL_9411173, EPI_ISL_9411281, EPI_ISL_9411413, EPI_ISL_9411452, EPI_ISL_9411597, EPI_ISL_9411811, EPI_ISL_9411897, EPI_ISL_9412242, EPI_ISL_9412260, EPI_ISL_9412277, EPI_ISL_9412506, EPI_ISL_9412617, EPI_ISL_9412620, EPI_ISL_9412841, EPI_ISL_9691920 |                                                                                                            | Danish Covid-19 Genome Consortium                                                                                                                                                                                  |                                                                                                                                                                                                                                                                                                                                                                                                                                                                                                                                                                                                                                                                                                         |
| see above                                                                                                                                                                                                                                                                                                                                                                                                                                                                                                                                                                                                                                                                                                                                                                                                                                                                                                                                                                                                                                                                                                                                                                                                                                                                                                                                                                                                                                                                                                                                                                                                                                                                                                                                                         | Molekylær Medicinsk Afdeling, Aarhus University Hospital, Aarhus, Denmark                                  | Statens Serum Institut Bioinformatics and Microbial Genomics                                                                                                                                                       |                                                                                                                                                                                                                                                                                                                                                                                                                                                                                                                                                                                                                                                                                                         |
| EPI_ISL_9604296, EPI_ISL_9612677, EPI_ISL_9612678                                                                                                                                                                                                                                                                                                                                                                                                                                                                                                                                                                                                                                                                                                                                                                                                                                                                                                                                                                                                                                                                                                                                                                                                                                                                                                                                                                                                                                                                                                                                                                                                                                                                                                                 | NHL Municipal Medical College, Ahmedabad (SVP)                                                             | Gujarat Biotechnology Research Centre                                                                                                                                                                              | Akhilesh Modi; Apurvashin Puvav; Bhadreshsinh Gohil; Chaitanya Joshi; Disha Vora; Janvi Raval; Jaykumar Rangani; Jayshree Pethani; Madhvi Joshi; Nimesh Patel; Nitin Savaliya; NitinShukla; Priyank Chavda; Ramesh Pandit; Roshani Mishra; Sonal Sharma; Tasnim Trivedi; Zarna Patel                                                                                                                                                                                                                                                                                                                                                                                                                    |
| EPI_ISL_9388277, EPI_ISL_9388280,                                                                                                                                                                                                                                                                                                                                                                                                                                                                                                                                                                                                                                                                                                                                                                                                                                                                                                                                                                                                                                                                                                                                                                                                                                                                                                                                                                                                                                                                                                                                                                                                                                                                                                                                 | NPHL                                                                                                       | National Public Health Laboratory                                                                                                                                                                                  | National Public Health Laboratory Team                                                                                                                                                                                                                                                                                                                                                                                                                                                                                                                                                                                                                                                                  |

|                                                                                                                                                                                                                                                                                                                                                                                                                                                                                                                                                                                                                                                                                                                                                                                                                                                                                                                                                                                                                                                                                                                                                                                                                                                                                                                                                                                                                                                                                                                                                                                                                                                                                                                                                                                                                                                                                                                                                                                                                  |                                                                                                                                                                                                                     |                                                                                                                                                                                                                                                                                                                                                                          |                                                                                                                                                                                                                                                                                                                                                                                                                                                                                                                                                                                                                                                                                                            |
|------------------------------------------------------------------------------------------------------------------------------------------------------------------------------------------------------------------------------------------------------------------------------------------------------------------------------------------------------------------------------------------------------------------------------------------------------------------------------------------------------------------------------------------------------------------------------------------------------------------------------------------------------------------------------------------------------------------------------------------------------------------------------------------------------------------------------------------------------------------------------------------------------------------------------------------------------------------------------------------------------------------------------------------------------------------------------------------------------------------------------------------------------------------------------------------------------------------------------------------------------------------------------------------------------------------------------------------------------------------------------------------------------------------------------------------------------------------------------------------------------------------------------------------------------------------------------------------------------------------------------------------------------------------------------------------------------------------------------------------------------------------------------------------------------------------------------------------------------------------------------------------------------------------------------------------------------------------------------------------------------------------|---------------------------------------------------------------------------------------------------------------------------------------------------------------------------------------------------------------------|--------------------------------------------------------------------------------------------------------------------------------------------------------------------------------------------------------------------------------------------------------------------------------------------------------------------------------------------------------------------------|------------------------------------------------------------------------------------------------------------------------------------------------------------------------------------------------------------------------------------------------------------------------------------------------------------------------------------------------------------------------------------------------------------------------------------------------------------------------------------------------------------------------------------------------------------------------------------------------------------------------------------------------------------------------------------------------------------|
| EPI_ISL_9388284<br>EPI_ISL_9534226                                                                                                                                                                                                                                                                                                                                                                                                                                                                                                                                                                                                                                                                                                                                                                                                                                                                                                                                                                                                                                                                                                                                                                                                                                                                                                                                                                                                                                                                                                                                                                                                                                                                                                                                                                                                                                                                                                                                                                               | NZOZ MEDITEST Diagnostyka Medyczna Jacek Podolski                                                                                                                                                                   | 1. Tricity SARS-CoV-2 sequencing consortium: University of Gdansk, Medical University of Gdansk, Vaxican Ltd., Invicta Ltd. 2. National Institute of Public Health - National Institute of Hygiene, Warsaw, Poland                                                                                                                                                       | Celina Cybulska; Karolina Gackowska; Katarzyna Groth; Katarzyna Zacharczuk; Krystyna Bienkowska Szewczyk; Lukasz Rabalski; Maciej Grzybek; Maciej Kosinski; Magdalena Nowakowska; Marcin Lubocki; Małgorzata Sadkowska-Todys; Tomasz Wolkowicz                                                                                                                                                                                                                                                                                                                                                                                                                                                             |
| EPI_ISL_9509379,<br>EPI_ISL_9509666                                                                                                                                                                                                                                                                                                                                                                                                                                                                                                                                                                                                                                                                                                                                                                                                                                                                                                                                                                                                                                                                                                                                                                                                                                                                                                                                                                                                                                                                                                                                                                                                                                                                                                                                                                                                                                                                                                                                                                              | NZOZ Medyczne Laboratorium Diagnostyczne Warszawa Solec                                                                                                                                                             | 1. Academic Center for Pathomorphological and Genetic-Molecular Diagnostics Ltd, Białystok, Poland<br>2. National Institute of Public Health - National Institute of Hygiene, Warsaw, Poland                                                                                                                                                                             | Anetta Sulewska; Jacek Nikliński; Janusz Dzieciół; Joanna Kiśluk; Katarzyna Zacharczuk; Konrad Raczkowski; Magdalena Nowakowska; Małgorzata Sadkowska-Todys; Piotr Karabowicz; Piotr Majewski; Przemysław Bieчек. Joanna Reszeć; Radosław Charkiewicz; Tomasz Wolkowicz                                                                                                                                                                                                                                                                                                                                                                                                                                    |
| EPI_ISL_9740625                                                                                                                                                                                                                                                                                                                                                                                                                                                                                                                                                                                                                                                                                                                                                                                                                                                                                                                                                                                                                                                                                                                                                                                                                                                                                                                                                                                                                                                                                                                                                                                                                                                                                                                                                                                                                                                                                                                                                                                                  | Nacionaline visuomenės sveikatos priežiūros laboratorija                                                                                                                                                            | Vilnius University Hospital Santaros Klinikos, Center of Laboratory Medicine                                                                                                                                                                                                                                                                                             | Daniel Naumovas; Dovile Juozapaitė; Gytis Dudas; Ingrida Olendraite; Ligitė Raugaite; Monika Katenaitė; Rimvydas Norvilas                                                                                                                                                                                                                                                                                                                                                                                                                                                                                                                                                                                  |
| EPI_ISL_9029193                                                                                                                                                                                                                                                                                                                                                                                                                                                                                                                                                                                                                                                                                                                                                                                                                                                                                                                                                                                                                                                                                                                                                                                                                                                                                                                                                                                                                                                                                                                                                                                                                                                                                                                                                                                                                                                                                                                                                                                                  | Narodowy Instytut Zdrowia Publicznego PZH                                                                                                                                                                           | WSSE w Warszawie                                                                                                                                                                                                                                                                                                                                                         | Dorota Wagrocka - Rocznik                                                                                                                                                                                                                                                                                                                                                                                                                                                                                                                                                                                                                                                                                  |
| EPI_ISL_9509631,<br>EPI_ISL_9509635,<br>EPI_ISL_9509636,<br>EPI_ISL_9509655                                                                                                                                                                                                                                                                                                                                                                                                                                                                                                                                                                                                                                                                                                                                                                                                                                                                                                                                                                                                                                                                                                                                                                                                                                                                                                                                                                                                                                                                                                                                                                                                                                                                                                                                                                                                                                                                                                                                      | Narodowy Instytut Zdrowia Publicznego - PZH                                                                                                                                                                         | 1. Academic Center for Pathomorphological and Genetic-Molecular Diagnostics Ltd, Białystok, Poland<br>2. National Institute of Public Health - National Institute of Hygiene, Warsaw, Poland                                                                                                                                                                             | Anetta Sulewska; Jacek Nikliński; Janusz Dzieciół; Joanna Kiśluk; Katarzyna Zacharczuk; Konrad Raczkowski; Magdalena Nowakowska; Małgorzata Sadkowska-Todys; Piotr Karabowicz; Piotr Majewski; Przemysław Bieчек. Joanna Reszeć; Radosław Charkiewicz; Tomasz Wolkowicz                                                                                                                                                                                                                                                                                                                                                                                                                                    |
| EPI_ISL_9521147,<br>EPI_ISL_9521148                                                                                                                                                                                                                                                                                                                                                                                                                                                                                                                                                                                                                                                                                                                                                                                                                                                                                                                                                                                                                                                                                                                                                                                                                                                                                                                                                                                                                                                                                                                                                                                                                                                                                                                                                                                                                                                                                                                                                                              | National Institute of Public Health                                                                                                                                                                                 | National Institute of Public Health                                                                                                                                                                                                                                                                                                                                      | Alexander Nagy; Helena Jirincova; Jan Moskalyk; Jaromira Vecerova; Timotej Suri                                                                                                                                                                                                                                                                                                                                                                                                                                                                                                                                                                                                                            |
| EPI_ISL_9386738,<br>EPI_ISL_9386781                                                                                                                                                                                                                                                                                                                                                                                                                                                                                                                                                                                                                                                                                                                                                                                                                                                                                                                                                                                                                                                                                                                                                                                                                                                                                                                                                                                                                                                                                                                                                                                                                                                                                                                                                                                                                                                                                                                                                                              | National Platform bis COVID ULB-IBC                                                                                                                                                                                 | National Platform bis COVID ULB-IBC                                                                                                                                                                                                                                                                                                                                      | Arnaud Marchant; Benoit Haerlingen; Coralie Henin; Marie-Luce Delforge; Ricardo De Mendonça                                                                                                                                                                                                                                                                                                                                                                                                                                                                                                                                                                                                                |
| EPI_ISL_9233081, EPI_ISL_9233082, EPI_ISL_9233083, EPI_ISL_9233084, EPI_ISL_9233085, EPI_ISL_9233086, EPI_ISL_9233087, EPI_ISL_9233088, EPI_ISL_9233090, EPI_ISL_9233091, EPI_ISL_9233092, EPI_ISL_9233093, EPI_ISL_9233094, EPI_ISL_9233095, EPI_ISL_9233096, EPI_ISL_9233097, EPI_ISL_9233098, EPI_ISL_9233099, EPI_ISL_9233100, EPI_ISL_9233101, EPI_ISL_9233102, EPI_ISL_9233103, EPI_ISL_9233104, EPI_ISL_9233105, EPI_ISL_9233106, EPI_ISL_9233107, EPI_ISL_9233108, EPI_ISL_9233109, EPI_ISL_9233110, EPI_ISL_9233111, EPI_ISL_9233112, EPI_ISL_9233113, EPI_ISL_9233114, EPI_ISL_9233115, EPI_ISL_9233116, EPI_ISL_9233117, EPI_ISL_9233118, EPI_ISL_9233119, EPI_ISL_9233120, EPI_ISL_9233121, EPI_ISL_9233122, EPI_ISL_9233123, EPI_ISL_9233124, EPI_ISL_9233125, EPI_ISL_9233126, EPI_ISL_9233127, EPI_ISL_9233128, EPI_ISL_9233129, EPI_ISL_9233130, EPI_ISL_9233131, EPI_ISL_9233132, EPI_ISL_9233133, EPI_ISL_9233134, EPI_ISL_9233135, EPI_ISL_9233136, EPI_ISL_9233137, EPI_ISL_9233138, EPI_ISL_9233139, EPI_ISL_9233140, EPI_ISL_9233141, EPI_ISL_9233142, EPI_ISL_9233143, EPI_ISL_9233144, EPI_ISL_9233145, EPI_ISL_9233146, EPI_ISL_9233147, EPI_ISL_9233148, EPI_ISL_9233149, EPI_ISL_9233150, EPI_ISL_9233151, EPI_ISL_9233152, EPI_ISL_9233153, EPI_ISL_9233154, EPI_ISL_9233155, EPI_ISL_9233156, EPI_ISL_9233157, EPI_ISL_9233158, EPI_ISL_9233159, EPI_ISL_9233160, EPI_ISL_9233161, EPI_ISL_9233162, EPI_ISL_9233163, EPI_ISL_9233164, EPI_ISL_9233165, EPI_ISL_9233166, EPI_ISL_9233167, EPI_ISL_9233168, EPI_ISL_9233169, EPI_ISL_9233170, EPI_ISL_9233171, EPI_ISL_9233172, EPI_ISL_9233173, EPI_ISL_9233174, EPI_ISL_9233175, EPI_ISL_9233176, EPI_ISL_9233177, EPI_ISL_9233178, EPI_ISL_9233179, EPI_ISL_9233180, EPI_ISL_9233181, EPI_ISL_9438153, EPI_ISL_9438156, EPI_ISL_9438157, EPI_ISL_9438159, EPI_ISL_9438163, EPI_ISL_9438166, EPI_ISL_9438168, EPI_ISL_9438169, EPI_ISL_9438171, EPI_ISL_9438173, EPI_ISL_9438174, EPI_ISL_9438175, EPI_ISL_9438178, EPI_ISL_9438179 | National Public Health Laboratory, National Centre for Infectious Diseases                                                                                                                                          | Benny Yeo; Grace Ngan; Lin Cui; Raymond Tzer Pin Lin; Royce Ang; Samuel Loo; Yichen Ding; Zhenyang Zhou                                                                                                                                                                                                                                                                  |                                                                                                                                                                                                                                                                                                                                                                                                                                                                                                                                                                                                                                                                                                            |
| EPI_ISL_9658979                                                                                                                                                                                                                                                                                                                                                                                                                                                                                                                                                                                                                                                                                                                                                                                                                                                                                                                                                                                                                                                                                                                                                                                                                                                                                                                                                                                                                                                                                                                                                                                                                                                                                                                                                                                                                                                                                                                                                                                                  | Nemocnice Havlickuv Brod                                                                                                                                                                                            | University Hospital Brno, CMGB                                                                                                                                                                                                                                                                                                                                           | Bezdicke Matej; Dolejska Monika; Krystyna Dufkova; Lengerova Martina; Svaton Jan                                                                                                                                                                                                                                                                                                                                                                                                                                                                                                                                                                                                                           |
| EPI_ISL_9705915                                                                                                                                                                                                                                                                                                                                                                                                                                                                                                                                                                                                                                                                                                                                                                                                                                                                                                                                                                                                                                                                                                                                                                                                                                                                                                                                                                                                                                                                                                                                                                                                                                                                                                                                                                                                                                                                                                                                                                                                  | Niepubliczny Zakład Opieki Zdrowotnej Pracownia Genetyki Nowotworów                                                                                                                                                 | 231. Tricity SARS-CoV-2 sequencing consortium: University of Gdansk, Medical University of Gdansk, Vaxican Ltd., Invicta Ltd. 2. National Institute of Public Health - National Institute of Hygiene, Warsaw, Poland                                                                                                                                                     | Celina Cybulska; Karolina Gackowska; Katarzyna Groth; Katarzyna Zacharczuk; Krystyna Bienkowska Szewczyk; Lukasz Rabalski; Maciej Grzybek; Maciej Kosinski; Magdalena Nowakowska; Marcin Lubocki; Małgorzata Sadkowska-Todys; Tomasz Wolkowicz                                                                                                                                                                                                                                                                                                                                                                                                                                                             |
| EPI_ISL_9705916                                                                                                                                                                                                                                                                                                                                                                                                                                                                                                                                                                                                                                                                                                                                                                                                                                                                                                                                                                                                                                                                                                                                                                                                                                                                                                                                                                                                                                                                                                                                                                                                                                                                                                                                                                                                                                                                                                                                                                                                  | Niepubliczny Zakład Opieki Zdrowotnej Pracownia Genetyki Nowotworów                                                                                                                                                 | 232. Tricity SARS-CoV-2 sequencing consortium: University of Gdansk, Medical University of Gdansk, Vaxican Ltd., Invicta Ltd. 2. National Institute of Public Health - National Institute of Hygiene, Warsaw, Poland                                                                                                                                                     | Celina Cybulska; Karolina Gackowska; Katarzyna Groth; Katarzyna Zacharczuk; Krystyna Bienkowska Szewczyk; Lukasz Rabalski; Maciej Grzybek; Maciej Kosinski; Magdalena Nowakowska; Marcin Lubocki; Małgorzata Sadkowska-Todys; Tomasz Wolkowicz                                                                                                                                                                                                                                                                                                                                                                                                                                                             |
| EPI_ISL_9433825                                                                                                                                                                                                                                                                                                                                                                                                                                                                                                                                                                                                                                                                                                                                                                                                                                                                                                                                                                                                                                                                                                                                                                                                                                                                                                                                                                                                                                                                                                                                                                                                                                                                                                                                                                                                                                                                                                                                                                                                  | North Shore Hospital                                                                                                                                                                                                | Institute of Environmental Science and Research (ESR)                                                                                                                                                                                                                                                                                                                    | Anja Werno; Antje van der Linden; Arlo Upton; Chris Mansell; Clare Gebbie; David Hammer; Dhanisha Patel; Dragana Drinkovic; Erasmus Smit; Gary McAuliffe; Hana Sofia Andersson; Hermes Perez; James Ussher; Jill Sherwood; Jing Wang; Joep de Ligst; Josh Freeman; Julia Howard; Juliet Elvy; Lauren Jelly; Mary DeAlmeida; Matt Blakiston; Matt Storey; Matthew Rogers; Max Bloomfield; Michael Addidie; Michelle Balm; Muhammad Faisal; Nikki Freed; Olin Silander; Olivia Stroeven; Rachel Boyle; Sally Roberts; SallyAnn Harbison; Sarah Cockerton; Sarah Jefferies; Sharmini Muttaiah; Susan Morphet; Susan Taylor; Timothy Blackmore; Vani Sathayendran; Veronica Playle; Virginia Hope; Xiaoyun Ren |
| EPI_ISL_9604342,<br>EPI_ISL_9696299,<br>EPI_ISL_9696300,<br>EPI_ISL_9696301,<br>EPI_ISL_9696302,<br>EPI_ISL_9696303                                                                                                                                                                                                                                                                                                                                                                                                                                                                                                                                                                                                                                                                                                                                                                                                                                                                                                                                                                                                                                                                                                                                                                                                                                                                                                                                                                                                                                                                                                                                                                                                                                                                                                                                                                                                                                                                                              | Northstar Pathology Laboratory, Ahmedabad                                                                                                                                                                           | Gujarat Biotechnology Research Centre                                                                                                                                                                                                                                                                                                                                    | Akhilesh Modi; Apurvashin Puvur; Bhadrashin Gohil; Chaitanya Joshi; Dhaval; Disha Vora; Janvi Raval; Jaykumar Rangan; Kanupriya; Madhvi Joshi; Nimesh Patel; Nitin Savaliya; NitinShukla; Priyank Chavda; Ramesh Pandit; Roshani Mishra; Sonal Sharma; Tasnim Trivedi; Zarra Patel                                                                                                                                                                                                                                                                                                                                                                                                                         |
| EPI_ISL_9605524, EPI_ISL_9605543, EPI_ISL_9605599, EPI_ISL_9605768, EPI_ISL_9606976, EPI_ISL_9607060, EPI_ISL_9607171, EPI_ISL_9608454, EPI_ISL_9609408, EPI_ISL_9729686, EPI_ISL_9734516                                                                                                                                                                                                                                                                                                                                                                                                                                                                                                                                                                                                                                                                                                                                                                                                                                                                                                                                                                                                                                                                                                                                                                                                                                                                                                                                                                                                                                                                                                                                                                                                                                                                                                                                                                                                                        | see above                                                                                                                                                                                                           | Northumbria University / South Tees Hospitals NHS Foundation Trust / North Cumbria Integrated Care NHS Foundation Trust / North Tees and Hartlepool NHS Foundation Trust / Newcastle Hospitals NHS Foundation Trust                                                                                                                                                      | COVID-19 Genomics UK (COG-UK) Consortium                                                                                                                                                                                                                                                                                                                                                                                                                                                                                                                                                                                                                                                                   |
| see above                                                                                                                                                                                                                                                                                                                                                                                                                                                                                                                                                                                                                                                                                                                                                                                                                                                                                                                                                                                                                                                                                                                                                                                                                                                                                                                                                                                                                                                                                                                                                                                                                                                                                                                                                                                                                                                                                                                                                                                                        | Northumbria University / South Tees Hospitals NHS Foundation Trust / North Cumbria Integrated Care NHS Foundation Trust / North Tees and Hartlepool NHS Foundation Trust / Newcastle Hospitals NHS Foundation Trust | COVID-19 Genomics UK (COG-UK) Consortium                                                                                                                                                                                                                                                                                                                                 | Andrew Nelson; Brendan Payne; Clive Graham; Darren L Smith; Debra Padgett; Edward Barton; Emma Swindells; Garren Scott; Gary Black; Gary Eltringham; Giles S Holt; Greg R Young; Jane Greenaway; Jennifer Collins; John Allan; Joshua Loh; Lynn Dover; Matthew Bashton; Mohammad A Tariq; Paul Baker; Sarah Essex; Steve Liggett; Wen C Yew; Yusril Taha                                                                                                                                                                                                                                                                                                                                                   |
| EPI_ISL_9658945,<br>EPI_ISL_9658862                                                                                                                                                                                                                                                                                                                                                                                                                                                                                                                                                                                                                                                                                                                                                                                                                                                                                                                                                                                                                                                                                                                                                                                                                                                                                                                                                                                                                                                                                                                                                                                                                                                                                                                                                                                                                                                                                                                                                                              | OKMI                                                                                                                                                                                                                | University Hospital Brno, CMGB                                                                                                                                                                                                                                                                                                                                           | Bezdicke Matej; Dolejska Monika; Krystyna Dufkova; Lengerova Martina; Svaton Jan                                                                                                                                                                                                                                                                                                                                                                                                                                                                                                                                                                                                                           |
| EPI_ISL_9744326                                                                                                                                                                                                                                                                                                                                                                                                                                                                                                                                                                                                                                                                                                                                                                                                                                                                                                                                                                                                                                                                                                                                                                                                                                                                                                                                                                                                                                                                                                                                                                                                                                                                                                                                                                                                                                                                                                                                                                                                  | OTHERS - CAGAYAN VALLEY CENTER FOR HEALTH DEVELOPMENT                                                                                                                                                               | Research Institute for Tropical Medicine                                                                                                                                                                                                                                                                                                                                 | Alexander Sadiasa; Amalea Dulcene D. Nicolasora; Anne Pauline A. Alpino; Ardiane Ysabelle M. Dolor; Catalino S. Demetria; Criselda T. Bautista; Francisco Gerardo M. Polotan; Gerald Ivan Sotelo; Jefferson Earl J. Halog; Joseph Hughes; Joy Mariette L. Pararay; Kirstyn Brunker; Lei Lanna M. Dancel; Ma. Angelica A. Tujan; Mayan Uy-Lumandas; Othoniel Jan T. Onza; Simon Daldry; Timothy John R. Dizon; Vina Lea F. Arguelles; Yao-Tsun Li                                                                                                                                                                                                                                                           |
| EPI_ISL_9744337,<br>EPI_ISL_9744338                                                                                                                                                                                                                                                                                                                                                                                                                                                                                                                                                                                                                                                                                                                                                                                                                                                                                                                                                                                                                                                                                                                                                                                                                                                                                                                                                                                                                                                                                                                                                                                                                                                                                                                                                                                                                                                                                                                                                                              | OTHERS - DOH - REGION XI                                                                                                                                                                                            | Research Institute for Tropical Medicine                                                                                                                                                                                                                                                                                                                                 | Alexander Sadiasa; Amalea Dulcene D. Nicolasora; Anne Pauline A. Alpino; Ardiane Ysabelle M. Dolor; Catalino S. Demetria; Criselda T. Bautista; Francisco Gerardo M. Polotan; Gerald Ivan Sotelo; Jefferson Earl J. Halog; Joseph Hughes; Joy Mariette L. Pararay; Kirstyn Brunker; Lei Lanna M. Dancel; Ma. Angelica A. Tujan; Mayan Uy-Lumandas; Othoniel Jan T. Onza; Simon Daldry; Timothy John R. Dizon; Vina Lea F. Arguelles; Yao-Tsun Li                                                                                                                                                                                                                                                           |
| EPI_ISL_9663617<br>EPI_ISL_9705933                                                                                                                                                                                                                                                                                                                                                                                                                                                                                                                                                                                                                                                                                                                                                                                                                                                                                                                                                                                                                                                                                                                                                                                                                                                                                                                                                                                                                                                                                                                                                                                                                                                                                                                                                                                                                                                                                                                                                                               | Oblastni nemocnice Trutnov a.s.<br>Onkologiczna Pracownia Molekularna Sp. z o.o                                                                                                                                     | University Hospital Hradec Kralove<br>250. Tricity SARS-CoV-2 sequencing consortium: University of Gdansk, Medical University of Gdansk, Vaxican Ltd., Invicta Ltd. 2. National Institute of Public Health - National Institute of Hygiene, Warsaw, Poland                                                                                                               | Celina Cybulska; Karolina Gackowska; Katarzyna Groth; Katarzyna Zacharczuk; Krystyna Bienkowska Szewczyk; Lukasz Rabalski; Maciej Grzybek; Maciej Kosinski; Magdalena Nowakowska; Marcin Lubocki; Małgorzata Sadkowska-Todys; Tomasz Wolkowicz                                                                                                                                                                                                                                                                                                                                                                                                                                                             |
| EPI_ISL_9693114,<br>EPI_ISL_9693123,<br>EPI_ISL_9693124,<br>EPI_ISL_9693126                                                                                                                                                                                                                                                                                                                                                                                                                                                                                                                                                                                                                                                                                                                                                                                                                                                                                                                                                                                                                                                                                                                                                                                                                                                                                                                                                                                                                                                                                                                                                                                                                                                                                                                                                                                                                                                                                                                                      | Orebro University Hospital, Dept Laboratory Medicine, Clinical Microbiology                                                                                                                                         | Orebro University Hospital                                                                                                                                                                                                                                                                                                                                               | Sundqvist M et al                                                                                                                                                                                                                                                                                                                                                                                                                                                                                                                                                                                                                                                                                          |
| EPI_ISL_9691947, EPI_ISL_9692093, EPI_ISL_9694371, EPI_ISL_9695597, EPI_ISL_9742804, EPI_ISL_9743014, EPI_ISL_9743626, EPI_ISL_9743786, EPI_ISL_9743911, EPI_ISL_9743932, EPI_ISL_9744110, EPI_ISL_9744212, EPI_ISL_9744705, EPI_ISL_9744707, EPI_ISL_9744880, EPI_ISL_9745044, EPI_ISL_9745420, EPI_ISL_9745514, EPI_ISL_9745697, EPI_ISL_9746103, EPI_ISL_9746526, EPI_ISL_9746582, EPI_ISL_9746759, EPI_ISL_9746922, EPI_ISL_9747417, EPI_ISL_9747417, EPI_ISL_9747559, EPI_ISL_9748174, EPI_ISL_9748417, EPI_ISL_9748448, EPI_ISL_9748513, EPI_ISL_9748521, EPI_ISL_9748560, EPI_ISL_9748618, EPI_ISL_9748631, EPI_ISL_9748659, EPI_ISL_9748670, EPI_ISL_9749202, EPI_ISL_9749420, EPI_ISL_9749496, EPI_ISL_9749824, EPI_ISL_9749894, EPI_ISL_9749933, EPI_ISL_9750400, EPI_ISL_9750454, EPI_ISL_9750494, EPI_ISL_9750572, EPI_ISL_9787728, EPI_ISL_9788051, EPI_ISL_9788530                                                                                                                                                                                                                                                                                                                                                                                                                                                                                                                                                                                                                                                                                                                                                                                                                                                                                                                                                                                                                                                                                                                                 | Sequencing lab: Pathogen Genomics Unit<br>Public Health Wales Microbiology Cardiff Wales Specialist Virology Centre                                                                                                 | Alec Birchley; Alexander Adams; Amy Gaskin; Angela Marchbank; Bree Gatica-Wilcox; Catherine Moore; Jason Coombes; Joanne Watkins; Joel Southgate; Johnathan Evans; Laura Gifford; Lauren Gilbert; Lee Graham; Malorie Perry; Matthew Bull; Nicole Pacchiarini; Sally Corden; Sara Kumziene-Summerhayes; Sara Rey; Sarah Taylor; Simon Cottrell; Sophie Jones; Tom Connor |                                                                                                                                                                                                                                                                                                                                                                                                                                                                                                                                                                                                                                                                                                            |
| EPI_ISL_9480457, EPI_ISL_9480465, EPI_ISL_9480466, EPI_ISL_9480470, EPI_ISL_9480477, EPI_ISL_9480486, EPI_ISL_9480490, EPI_ISL_9480498, EPI_ISL_9480506, EPI_ISL_9681611, EPI_ISL_9681613, EPI_ISL_9681620, EPI_ISL_9681632, EPI_ISL_9681637, EPI_ISL_9681638, EPI_ISL_9681641, EPI_ISL_9681642, EPI_ISL_9681644, EPI_ISL_9681645, EPI_ISL_9681646, EPI_ISL_9681649, EPI_ISL_9681650, EPI_ISL_9681652, EPI_ISL_9681656, EPI_ISL_9681676, EPI_ISL_9681681, EPI_ISL_9681696, EPI_ISL_9681712, EPI_ISL_9747246                                                                                                                                                                                                                                                                                                                                                                                                                                                                                                                                                                                                                                                                                                                                                                                                                                                                                                                                                                                                                                                                                                                                                                                                                                                                                                                                                                                                                                                                                                      | see above                                                                                                                                                                                                           | Oslo University Hospital, Department of Microbiology<br>Norwegian Institute of Public Health, Department of Virology                                                                                                                                                                                                                                                     | Arvind Yegambaram Meenakshi Sundaram; Cathrine Fladeby; Garcia Llorente Ignacio; Gregor D. Gillilan; Hilde Elshaug; Hilde Vollan; Jon Bråte; Kamilla Heddeland Instefjord; Karoline Bragstad; Kathrine Stene-Johansen; Line Victoria Moen; Lise Andresen; Mariann Nilsen; Mona Holberg-Petersen; Olevar Hungnes; Pedersen Benedikte Nevjen; Pål Marius Bjørnstad; Rasmus Riis Kopperud; Teodora Plamenova Ribarska                                                                                                                                                                                                                                                                                         |
| EPI_ISL_9321765,<br>EPI_ISL_9321777                                                                                                                                                                                                                                                                                                                                                                                                                                                                                                                                                                                                                                                                                                                                                                                                                                                                                                                                                                                                                                                                                                                                                                                                                                                                                                                                                                                                                                                                                                                                                                                                                                                                                                                                                                                                                                                                                                                                                                              | PAMM                                                                                                                                                                                                                | Laboratory of Medical Microbiology and Pathology, PAMM                                                                                                                                                                                                                                                                                                                   | Christel van Herk; Inge Briels; Jeroen van de Bovenkamp; Maaike Broeders; Pleunie van Alphen                                                                                                                                                                                                                                                                                                                                                                                                                                                                                                                                                                                                               |
| EPI_ISL_9275747,<br>EPI_ISL_9275749,<br>EPI_ISL_9275751                                                                                                                                                                                                                                                                                                                                                                                                                                                                                                                                                                                                                                                                                                                                                                                                                                                                                                                                                                                                                                                                                                                                                                                                                                                                                                                                                                                                                                                                                                                                                                                                                                                                                                                                                                                                                                                                                                                                                          | PPHC-Purdue University                                                                                                                                                                                              | Animal Disease Diagnostic Laboratory, Purdue University College of Veterinary Medicine                                                                                                                                                                                                                                                                                   | Jobin Kattoor; Rebecca P Wilkes                                                                                                                                                                                                                                                                                                                                                                                                                                                                                                                                                                                                                                                                            |
| EPI_ISL_9388274<br>EPI_ISL_9579209,<br>EPI_ISL_9581854,<br>EPI_ISL_9585125,<br>EPI_ISL_9595662,<br>EPI_ISL_9596558,<br>EPI_ISL_9596610                                                                                                                                                                                                                                                                                                                                                                                                                                                                                                                                                                                                                                                                                                                                                                                                                                                                                                                                                                                                                                                                                                                                                                                                                                                                                                                                                                                                                                                                                                                                                                                                                                                                                                                                                                                                                                                                           | PPHL Lumbini<br>PRAVA Health                                                                                                                                                                                        | National Public Health Laboratory<br>Genomic Research Lab, BCSIR                                                                                                                                                                                                                                                                                                         | National Public Health Laboratory Team<br>Barna Goswami; Eshrar Osman; Ifat Jahan; Md. Aftab Ali Shaikh; Md. Ahasan Habib; Md. Kamrul Islam; Md. Murshed Hasan Sarkar; Md. Salim Khan; Mohammad Mohi Uddin; Mohammad Samir Uzzaman; Sanjana Fatema Chowdhury; Shahina Akter; Showti Raheel Naser; Tanjina Akhter Banu; Zaheed Husain                                                                                                                                                                                                                                                                                                                                                                       |
| EPI_ISL_9659182,<br>EPI_ISL_9660545,<br>EPI_ISL_9660574,                                                                                                                                                                                                                                                                                                                                                                                                                                                                                                                                                                                                                                                                                                                                                                                                                                                                                                                                                                                                                                                                                                                                                                                                                                                                                                                                                                                                                                                                                                                                                                                                                                                                                                                                                                                                                                                                                                                                                         | Pandemic Response Lab - NYC                                                                                                                                                                                         | Pandemic Response Lab, R&D                                                                                                                                                                                                                                                                                                                                               | Alex Carpio; Cybill del Castillo; Haiping Hao; Isabel Fernandez Escapa; Jon Lauren; Melissa Hopkins; Michael Hammerling; Simran Chhabria; Simran Gupta; Sol Rey; Steven Chase; Tiara Rivera; William Ward                                                                                                                                                                                                                                                                                                                                                                                                                                                                                                  |

|                                                                                                                                                                                                                                                                                                                                                                                                                                                                                                                                                                                                                                                                                                                                                                                             |                                                                  |                                                                                                                                                                                                                     |                                                                                                                                                                                                                                                                                                                                                                                                                                                                                                                                                                                                                                                                                                          |                                                                                                                                                                                                                                                                                                                     |
|---------------------------------------------------------------------------------------------------------------------------------------------------------------------------------------------------------------------------------------------------------------------------------------------------------------------------------------------------------------------------------------------------------------------------------------------------------------------------------------------------------------------------------------------------------------------------------------------------------------------------------------------------------------------------------------------------------------------------------------------------------------------------------------------|------------------------------------------------------------------|---------------------------------------------------------------------------------------------------------------------------------------------------------------------------------------------------------------------|----------------------------------------------------------------------------------------------------------------------------------------------------------------------------------------------------------------------------------------------------------------------------------------------------------------------------------------------------------------------------------------------------------------------------------------------------------------------------------------------------------------------------------------------------------------------------------------------------------------------------------------------------------------------------------------------------------|---------------------------------------------------------------------------------------------------------------------------------------------------------------------------------------------------------------------------------------------------------------------------------------------------------------------|
| EPI_ISL_9660633,<br>EPI_ISL_9660890,<br>EPI_ISL_9664347                                                                                                                                                                                                                                                                                                                                                                                                                                                                                                                                                                                                                                                                                                                                     |                                                                  |                                                                                                                                                                                                                     |                                                                                                                                                                                                                                                                                                                                                                                                                                                                                                                                                                                                                                                                                                          |                                                                                                                                                                                                                                                                                                                     |
| EPI_ISL_9610189,<br>EPI_ISL_9610250                                                                                                                                                                                                                                                                                                                                                                                                                                                                                                                                                                                                                                                                                                                                                         | Pandit Dindayal Upadhyay Medical College, Rajkot                 | Gujarat Biotechnology Research Centre                                                                                                                                                                               | Akhilesh Modi; Apurvashin Puvar; Bhadreshsinh Gohil; Chaitanya Joshi; Disha Vora; Janvi Raval; Jaykumar Rangani; Kavathiya; Madhvi Joshi; Nimesh Patel; Nitin Savaliya; NitinShukla; Priyank Chavda; Ramesh Pandit; Roshani Mishra; Sonal Sharma; Tasnim Trivedi; Zarna Patel                                                                                                                                                                                                                                                                                                                                                                                                                            |                                                                                                                                                                                                                                                                                                                     |
| EPI_ISL_9636675,<br>EPI_ISL_9636693                                                                                                                                                                                                                                                                                                                                                                                                                                                                                                                                                                                                                                                                                                                                                         | PathLab Bay of Plenty                                            | Institute of Environmental Science and Research (ESR)                                                                                                                                                               | Anja Werno; Antje van der Linden; Arlo Upton; Chris Mansell; Clare Gebbie; David Hammer; Dhanisha Patel; Dragana Drinkovic; Erasmus Smit; Gary McAulliffe; Hana Sofia Andersson; Hermes Perez; James Ussher; Jill Sherwood; Jing Wang; Joep de Ligt; Josh Freeman; Julia Howard; Juliet Elvy; Lauren Jelly; Mary DeAlmeida; Matt Blakiston; Matt Storey; Matthew Rogers; Max Bloomfield; Michael Addie; Michelle Balm; Muhammad Faisal; Nikki Freed; Olin Silander; Olivia Stroeven; Rachel Boyle; Sally Roberts; SallyAnn Harbison; Sarah Cockerton; Sarah Jefferies; Sharmini Muttaiyah; Susan Morpeh; Susan Taylor; Timothy Blackmore; Vani Sathyaendran; Veronica Playle; Virginia Hope; Xiaoyun Ren |                                                                                                                                                                                                                                                                                                                     |
| EPI_ISL_9163967,<br>EPI_ISL_9163969                                                                                                                                                                                                                                                                                                                                                                                                                                                                                                                                                                                                                                                                                                                                                         | PathWest Laboratory Medicine WA                                  | PathWest Laboratory Medicine WA Microbial Surveillance Unit                                                                                                                                                         |                                                                                                                                                                                                                                                                                                                                                                                                                                                                                                                                                                                                                                                                                                          | PathWest Laboratory Medicine WA Microbial Surveillance Unit                                                                                                                                                                                                                                                         |
| EPI_ISL_9363056                                                                                                                                                                                                                                                                                                                                                                                                                                                                                                                                                                                                                                                                                                                                                                             | Pathology West - NSW Health Pathology                            | NSW Health Pathology - Institute of Clinical Pathology and Medical Research; Westmead Hospital; University of Sydney                                                                                                |                                                                                                                                                                                                                                                                                                                                                                                                                                                                                                                                                                                                                                                                                                          | Arnott A.; Draper J.; Gall M.; Martinez E.; Rockett R.; Sintchenko V.; on behalf of ICPMR                                                                                                                                                                                                                           |
| EPI_ISL_9431350, EPI_ISL_9431396, EPI_ISL_9431397, EPI_ISL_9431399, EPI_ISL_9431410, EPI_ISL_9479658, EPI_ISL_9479660, EPI_ISL_9479780, EPI_ISL_9479781, EPI_ISL_9479782                                                                                                                                                                                                                                                                                                                                                                                                                                                                                                                                                                                                                    | see above                                                        | Platform BIS UZA/UAntwerpen<br>Labo Klinische Biologie, UZA                                                                                                                                                         |                                                                                                                                                                                                                                                                                                                                                                                                                                                                                                                                                                                                                                                                                                          | Basil Britto Xavier; Christine Lammens; Herman Goossens; Ines Verbesselt; Jasmine Coppens; Kathleen Holemans; Marie Le Mercier; Veerle Matheusssen                                                                                                                                                                  |
| EPI_ISL_9508878,<br>EPI_ISL_9509643,<br>EPI_ISL_9509680,<br>EPI_ISL_9509716                                                                                                                                                                                                                                                                                                                                                                                                                                                                                                                                                                                                                                                                                                                 | Polski Bank Komórek Macierzystych S.A. - Diagnostyka Sp. z o. o. | 1. Academic Center for Pathomorphological and Genetic-Molecular Diagnostics Ltd, Białystok, Poland<br>2. National Institute of Public Health - National Institute of Hygiene, Warsaw, Poland                        | Anetta Sulewska; Jacek Nikliński; Janusz Dzieciol; Joanna Kiśluk; Katarzyna Zacharczuk; Konrad Raczkowski; Magdalena Nowakowska; Małgorzata Sadkowska-Todys; Piotr Karabowicz; Piotr Majewski; Przemysław Biecek. Joanna Reszcę; Radosław Charkiewicz; Tomasz Wolkowicz                                                                                                                                                                                                                                                                                                                                                                                                                                  |                                                                                                                                                                                                                                                                                                                     |
| EPI_ISL_8928585                                                                                                                                                                                                                                                                                                                                                                                                                                                                                                                                                                                                                                                                                                                                                                             | Powiatowa Stacja Sanitarno Epidemiologiczna                      | WSSE w Warszawie                                                                                                                                                                                                    |                                                                                                                                                                                                                                                                                                                                                                                                                                                                                                                                                                                                                                                                                                          | Dorota Wagrocka - Roczniak                                                                                                                                                                                                                                                                                          |
| EPI_ISL_9508879,<br>EPI_ISL_9509377,<br>EPI_ISL_9509412                                                                                                                                                                                                                                                                                                                                                                                                                                                                                                                                                                                                                                                                                                                                     | Powiatowa Stacja Sanitarno-Epidemiologiczna w Radomiu            | 1. Academic Center for Pathomorphological and Genetic-Molecular Diagnostics Ltd, Białystok, Poland<br>2. National Institute of Public Health - National Institute of Hygiene, Warsaw, Poland                        | Anetta Sulewska; Jacek Nikliński; Janusz Dzieciol; Joanna Kiśluk; Katarzyna Zacharczuk; Konrad Raczkowski; Magdalena Nowakowska; Małgorzata Sadkowska-Todys; Piotr Karabowicz; Piotr Majewski; Przemysław Biecek. Joanna Reszcę; Radosław Charkiewicz; Tomasz Wolkowicz                                                                                                                                                                                                                                                                                                                                                                                                                                  |                                                                                                                                                                                                                                                                                                                     |
| EPI_ISL_9571187,<br>EPI_ISL_9571192,<br>EPI_ISL_9571193                                                                                                                                                                                                                                                                                                                                                                                                                                                                                                                                                                                                                                                                                                                                     | Program Repatriasi Karantina Kementerian Kesehatan RI            | Genomik Solidaritas Indonesia Laboratorium                                                                                                                                                                          | Anna Christina Brazia; Annisa Muthiah Sukirman; Anuraj Shankar; Ariel Pradipta; Carissa Sintca Wijaya; Dhahlia Agustina Cahyono; Gracia Felias Enos Korompis; Louisa Markus; Meutia Ayupiteri Kumaheri; Reinhart Gabriel; Stefanus Bernard; Vivi Setiawaty                                                                                                                                                                                                                                                                                                                                                                                                                                               |                                                                                                                                                                                                                                                                                                                     |
| EPI_ISL_9342131, EPI_ISL_9342273, EPI_ISL_9683924, EPI_ISL_9683957, EPI_ISL_9684559, EPI_ISL_9684565, EPI_ISL_9684577, EPI_ISL_9684579, EPI_ISL_9684937, EPI_ISL_9684938, EPI_ISL_9684939                                                                                                                                                                                                                                                                                                                                                                                                                                                                                                                                                                                                   | see above                                                        | Public Health Ontario Laboratory                                                                                                                                                                                    | Aimin Li; Alireza Eshaghi; Andre Villegas; Ashleigh Sullivan; Christine Frantz; Dean Maxwell; Esha Joshi; Jared Simpson; Jennifer L Guthrie; Jonathan B Gubbay; Karthikeyan Sivaraman; Lawrence Heisler; Matthew Watson; Michael CY Li; Michael Laszloffy; Nahuel Fittipaldi; Philip Banh; Richard de Borja; Samir N Patel; Sandeep Nagra; Sandra Zittermann; Sarah Teatero; Vanessa G Allen; Yao Chen; Yogi Sundaravadanam                                                                                                                                                                                                                                                                              |                                                                                                                                                                                                                                                                                                                     |
| EPI_ISL_9669380,<br>EPI_ISL_9669581,<br>EPI_ISL_9669591,<br>EPI_ISL_9670116,<br>EPI_ISL_9670484,<br>EPI_ISL_9670541                                                                                                                                                                                                                                                                                                                                                                                                                                                                                                                                                                                                                                                                         | Quest Diagnostics Incorporated                                   | Centers for Disease Control and Prevention Division of Viral Diseases, Pathogen Discovery                                                                                                                           | A. Gerasimova; A. Perez; B. Anderson; Benjamin Rambo-Martin; Christopher Gulwick; Clinton Paden; Dakota Howard; Dhvani Batra; Duncan MacCannell; Erisa Sula; F. Lacbawan; I. Shlyakhter; Jason Caravas; K. Livingston; Kristine Lacey; L. Bernstein; M. Hua; Matthew Schmeer; P. Tanpaiboon; Peter Cook; R. Kagan; R. Owen; R. Rolando; S. Rosenthal; Scott Sammons; Shatavia Morrison; Tymeckia Kendall; Victoria Caban Figueroa; Y. Liu; Yvette Unoarumhi                                                                                                                                                                                                                                              |                                                                                                                                                                                                                                                                                                                     |
| EPI_ISL_9622147,<br>EPI_ISL_9622148                                                                                                                                                                                                                                                                                                                                                                                                                                                                                                                                                                                                                                                                                                                                                         | RS Anak & Bunda Harapan Kita                                     | National Institute of Health Research and Development                                                                                                                                                               | Arie Ardiansyah Nugraha; Fajar Nur Sulistiyohadi; Hana Aparsi Pawestri; Hartanti Dian Ikawati; Kartika Dewi Puspa; Nelly Puspandari; Nur Ika Hariastuti; Puri Widia; Subangkit; Vivi Setiawaty                                                                                                                                                                                                                                                                                                                                                                                                                                                                                                           |                                                                                                                                                                                                                                                                                                                     |
| EPI_ISL_9650485                                                                                                                                                                                                                                                                                                                                                                                                                                                                                                                                                                                                                                                                                                                                                                             | RS Pertamina Jaya                                                | Genomik Solidaritas Indonesia Laboratorium                                                                                                                                                                          | Anna Christina Brazia; Annisa Muthiah Sukirman; Anuraj Shankar; Ariel Pradipta; Carissa Sintca Wijaya; Dhahlia Agustina Cahyono; Gracia Felias Enos Korompis; Louisa Markus; Meutia Ayupiteri Kumaheri; Reinhart Gabriel; Romiko Andrianza L; Stefanus Bernard; Syukrini Bahri                                                                                                                                                                                                                                                                                                                                                                                                                           |                                                                                                                                                                                                                                                                                                                     |
| EPI_ISL_9651336,<br>EPI_ISL_9724175                                                                                                                                                                                                                                                                                                                                                                                                                                                                                                                                                                                                                                                                                                                                                         | RS YARSI                                                         | Genomik Solidaritas Indonesia Laboratorium                                                                                                                                                                          | Aisyi Sakina Rifani; Anna Christina Brazia; Annisa Muthiah Sukirman; Anuraj Shankar; Ariel Pradipta; Carissa Sintca Wijaya; Dhahlia Agustina Cahyono; Dian Pitaloka Rajagukguk; Esti Rahayuning Tias; Gracia Felias Enos Korompis; Intan Razari; Louisa Markus; Meutia Ayupiteri Kumaheri; Nelly Puspandari; Reinhart Gabriel; Stefanus Bernard; Syukrini Bahri; Vania Gavriila Wikasa                                                                                                                                                                                                                                                                                                                   |                                                                                                                                                                                                                                                                                                                     |
| EPI_ISL_9467868,<br>EPI_ISL_9467869,<br>EPI_ISL_9467870                                                                                                                                                                                                                                                                                                                                                                                                                                                                                                                                                                                                                                                                                                                                     | RSUD Abdul Moeleok Lampung                                       | National Institute of Health Research and Development                                                                                                                                                               | Arie Ardiansyah Nugraha; Fajar Nur Sulistiyohadi; Hana Aparsi Pawestri; Hartanti Dian Ikawati; Kartika Dewi Puspa; Nelly Puspandari; Nur Ika Hariastuti; Puri Widia; Subangkit; Vivi Setiawaty                                                                                                                                                                                                                                                                                                                                                                                                                                                                                                           |                                                                                                                                                                                                                                                                                                                     |
| EPI_ISL_9418188                                                                                                                                                                                                                                                                                                                                                                                                                                                                                                                                                                                                                                                                                                                                                                             | Radboudumc                                                       | Radboudumc                                                                                                                                                                                                          |                                                                                                                                                                                                                                                                                                                                                                                                                                                                                                                                                                                                                                                                                                          | Alma Tostmann; Ingrid Weerdenburg; Jordy Coolen                                                                                                                                                                                                                                                                     |
| EPI_ISL_9609610                                                                                                                                                                                                                                                                                                                                                                                                                                                                                                                                                                                                                                                                                                                                                                             | Regional Authority of Public Health Banks Bystrica               | Regional Authority of Public Health Banks Bystrica                                                                                                                                                                  |                                                                                                                                                                                                                                                                                                                                                                                                                                                                                                                                                                                                                                                                                                          | Alžbeta Pristýáková; Diana Rusňáková; Lucia Madarová; Michaela Mancio; Miroslav Böhrer; Pavol Mišenko; Soňa Feiková; Terézia Tomajková; Tomáš Szemes                                                                                                                                                                |
| EPI_ISL_9688185                                                                                                                                                                                                                                                                                                                                                                                                                                                                                                                                                                                                                                                                                                                                                                             | Regionalne Centrum Kwiadostwa i Kwioloznictwa w Poznaniu         | 1. Academic Center for Pathomorphological and Genetic-Molecular Diagnostics Ltd, Białystok, Poland<br>2. National Institute of Public Health - National Institute of Hygiene, Warsaw, Poland                        | Anetta Sulewska; Jacek Nikliński; Janusz Dzieciol; Joanna Kiśluk; Katarzyna Zacharczuk; Konrad Raczkowski; Magdalena Nowakowska; Małgorzata Sadkowska-Todys; Piotr Karabowicz; Piotr Majewski; Przemysław Biecek. Joanna Reszcę; Radosław Charkiewicz; Tomasz Wolkowicz                                                                                                                                                                                                                                                                                                                                                                                                                                  |                                                                                                                                                                                                                                                                                                                     |
| EPI_ISL_9705776                                                                                                                                                                                                                                                                                                                                                                                                                                                                                                                                                                                                                                                                                                                                                                             | Regionalny Szpital Specjalistyczny w Grudziądzu                  | 51. Tricity SARS-CoV-2 sequencing consortium: University of Gdansk, Medical University of Gdansk, Vaxican Ltd., Invicta Ltd. 2. National Institute of Public Health - National Institute of Hygiene, Warsaw, Poland | Celina Cybulska; Karolina Gackowska; Katarzyna Groth; Katarzyna Zacharczuk; Krystyna Bienkowska Szewczyk; Lukasz Rabalski; Maciej Grzybek; Maciej Kosinski; Magdalena Nowakowska; Marcin Lubocki; Małgorzata Sadkowska-Todys; Tomasz Wolkowicz                                                                                                                                                                                                                                                                                                                                                                                                                                                           |                                                                                                                                                                                                                                                                                                                     |
| EPI_ISL_9705778                                                                                                                                                                                                                                                                                                                                                                                                                                                                                                                                                                                                                                                                                                                                                                             | Regionalny Szpital Specjalistyczny w Grudziądzu                  | 53. Tricity SARS-CoV-2 sequencing consortium: University of Gdansk, Medical University of Gdansk, Vaxican Ltd., Invicta Ltd. 2. National Institute of Public Health - National Institute of Hygiene, Warsaw, Poland | Celina Cybulska; Karolina Gackowska; Katarzyna Groth; Katarzyna Zacharczuk; Krystyna Bienkowska Szewczyk; Lukasz Rabalski; Maciej Grzybek; Maciej Kosinski; Magdalena Nowakowska; Marcin Lubocki; Małgorzata Sadkowska-Todys; Tomasz Wolkowicz                                                                                                                                                                                                                                                                                                                                                                                                                                                           |                                                                                                                                                                                                                                                                                                                     |
| EPI_ISL_9705782                                                                                                                                                                                                                                                                                                                                                                                                                                                                                                                                                                                                                                                                                                                                                                             | Regionalny Szpital Specjalistyczny w Grudziądzu                  | 57. Tricity SARS-CoV-2 sequencing consortium: University of Gdansk, Medical University of Gdansk, Vaxican Ltd., Invicta Ltd. 2. National Institute of Public Health - National Institute of Hygiene, Warsaw, Poland | Celina Cybulska; Karolina Gackowska; Katarzyna Groth; Katarzyna Zacharczuk; Krystyna Bienkowska Szewczyk; Lukasz Rabalski; Maciej Grzybek; Maciej Kosinski; Magdalena Nowakowska; Marcin Lubocki; Małgorzata Sadkowska-Todys; Tomasz Wolkowicz                                                                                                                                                                                                                                                                                                                                                                                                                                                           |                                                                                                                                                                                                                                                                                                                     |
| EPI_ISL_9705788                                                                                                                                                                                                                                                                                                                                                                                                                                                                                                                                                                                                                                                                                                                                                                             | Regionalny Szpital Specjalistyczny w Grudziądzu                  | 63. Tricity SARS-CoV-2 sequencing consortium: University of Gdansk, Medical University of Gdansk, Vaxican Ltd., Invicta Ltd. 2. National Institute of Public Health - National Institute of Hygiene, Warsaw, Poland | Celina Cybulska; Karolina Gackowska; Katarzyna Groth; Katarzyna Zacharczuk; Krystyna Bienkowska Szewczyk; Lukasz Rabalski; Maciej Grzybek; Maciej Kosinski; Magdalena Nowakowska; Marcin Lubocki; Małgorzata Sadkowska-Todys; Tomasz Wolkowicz                                                                                                                                                                                                                                                                                                                                                                                                                                                           |                                                                                                                                                                                                                                                                                                                     |
| EPI_ISL_9562567, EPI_ISL_9562746, EPI_ISL_9562807, EPI_ISL_9562931, EPI_ISL_9611131, EPI_ISL_9650250, EPI_ISL_9691485, EPI_ISL_9740810, EPI_ISL_9741425, EPI_ISL_9741623, EPI_ISL_9814465, EPI_ISL_9814817                                                                                                                                                                                                                                                                                                                                                                                                                                                                                                                                                                                  | see above                                                        | Respiratory Virus Unit, Microbiology Services Colindale, Public Health England                                                                                                                                      | COVID-19 Genomics UK (COG-UK) Consortium                                                                                                                                                                                                                                                                                                                                                                                                                                                                                                                                                                                                                                                                 | PHE Covid Sequencing Team                                                                                                                                                                                                                                                                                           |
| EPI_ISL_9175444, EPI_ISL_9276334, EPI_ISL_9288762, EPI_ISL_9288796, EPI_ISL_9290240, EPI_ISL_9290541, EPI_ISL_9290551, EPI_ISL_9306872, EPI_ISL_9308047, EPI_ISL_9308073, EPI_ISL_9308088, EPI_ISL_9308153, EPI_ISL_9308195, EPI_ISL_9308410, EPI_ISL_9312119, EPI_ISL_9312162, EPI_ISL_9312244, EPI_ISL_9312276, EPI_ISL_9312295, EPI_ISL_9312306, EPI_ISL_9312416, EPI_ISL_9312493, EPI_ISL_9312583, EPI_ISL_9313079, EPI_ISL_9313370, EPI_ISL_9314703, EPI_ISL_9314764, EPI_ISL_9314778, EPI_ISL_9314812, EPI_ISL_9314912, EPI_ISL_9314967, EPI_ISL_9314977, EPI_ISL_9315705, EPI_ISL_9317588, EPI_ISL_9317683, EPI_ISL_9365930, EPI_ISL_9367221, EPI_ISL_9378783, EPI_ISL_9381252, EPI_ISL_9381269, EPI_ISL_9381393, EPI_ISL_9381746, EPI_ISL_9381858, EPI_ISL_9383340, EPI_ISL_9383360 | see above                                                        | Rosalind Franklin Laboratory                                                                                                                                                                                        | Wellcome Sanger Institute for the COVID-19 Genomics UK (COG-UK) Consortium                                                                                                                                                                                                                                                                                                                                                                                                                                                                                                                                                                                                                               | Cordelia Langford; David K. Jackson; Dominic Kwiatkowski; Donald Fraser; Ewan Harrison; Ian Johnston; Jeffrey Barrett; John Sillitoe on behalf of the Wellcome Sanger Institute COVID-19 Surveillance Team; Rob Howes; Roberto Amato; Sonia Goncalves; Suki Lee; The Rosalind Franklin Laboratory and Alex Alderton |
| EPI_ISL_9504139                                                                                                                                                                                                                                                                                                                                                                                                                                                                                                                                                                                                                                                                                                                                                                             | Royal GD                                                         | Royal GD                                                                                                                                                                                                            |                                                                                                                                                                                                                                                                                                                                                                                                                                                                                                                                                                                                                                                                                                          | Remco Dijkman                                                                                                                                                                                                                                                                                                       |
| EPI_ISL_9620237                                                                                                                                                                                                                                                                                                                                                                                                                                                                                                                                                                                                                                                                                                                                                                             | SARS-CoV-2 Sequencing Castilla y Leon-Spain Consortium           | SARS-CoV-2 Sequencing Castilla y Leon-Spain Consortium                                                                                                                                                              | Antonio Orduña-Domingo; Carlos Fuster Foz; Carmen Aldea-Mansilla; Carmen Gimeno Crespo; David Abad; Gabriel March Rosello; Gregoria Megias Lobón; Jose Maria Eiros Bouza; M. Isabel Fernandez-Natal; Marta Dominguez-Gil; Marta Hernandez; María Antonia García Castro; M <sup>a</sup> Fe Brezmes-Valdivieso; Noelia Arenal Andrés; Silvia Rojo; Sonselos Garcinuño Pérez                                                                                                                                                                                                                                                                                                                                |                                                                                                                                                                                                                                                                                                                     |
| EPI_ISL_9713645                                                                                                                                                                                                                                                                                                                                                                                                                                                                                                                                                                                                                                                                                                                                                                             | SP ZOZ w Brzesku                                                 | 1. Academic Center for Pathomorphological and Genetic-Molecular Diagnostics Ltd, Białystok, Poland<br>2. National Institute of Public Health - National Institute of Hygiene, Warsaw, Poland                        | Anetta Sulewska; Jacek Nikliński; Janusz Dzieciol; Joanna Kiśluk; Katarzyna Zacharczuk; Konrad Raczkowski; Magdalena Nowakowska; Małgorzata Sadkowska-Todys; Piotr Karabowicz; Piotr Majewski; Przemysław Biecek. Joanna Reszcę; Radosław Charkiewicz; Tomasz Wolkowicz                                                                                                                                                                                                                                                                                                                                                                                                                                  |                                                                                                                                                                                                                                                                                                                     |
| EPI_ISL_9604289                                                                                                                                                                                                                                                                                                                                                                                                                                                                                                                                                                                                                                                                                                                                                                             | SSG Hospital Vadodara                                            | Gujarat Biotechnology Research Centre                                                                                                                                                                               | Akhilesh Modi; Apurvashin Puvar; Bhadreshsinh Gohil; Chaitanya Joshi; Disha Vora; Janvi Raval; Jaykumar Rangani; Jigna Karia; Madhvi Joshi; Nimesh Patel; Nitin Savaliya; NitinShukla; Priyank Chavda; Ramesh Pandit; Roshani Mishra; Sonal Sharma; Tasnim Trivedi; Zarna Patel                                                                                                                                                                                                                                                                                                                                                                                                                          |                                                                                                                                                                                                                                                                                                                     |
| EPI_ISL_9452774, EPI_ISL_9452828, EPI_ISL_9453071, EPI_ISL_9453634, EPI_ISL_9453908, EPI_ISL_9454372, EPI_ISL_9454635, EPI_ISL_9454687, EPI_ISL_9454717, EPI_ISL_9454950, EPI_ISL_9454967, EPI_ISL_9454968, EPI_ISL_9459502, EPI_ISL_9459975, EPI_ISL_9459983, EPI_ISL_9460004, EPI_ISL_9460016, EPI_ISL_9460032, EPI_ISL_9460278, EPI_ISL_9460297, EPI_ISL_9460306, EPI_ISL_9460358, EPI_ISL_9460645, EPI_ISL_9462943, EPI_ISL_9463209, EPI_ISL_9463220, EPI_ISL_9463226, EPI_ISL_9463236                                                                                                                                                                                                                                                                                                  | see above                                                        | SYNLAB MVZ Berlin                                                                                                                                                                                                   | Robert Koch Institute                                                                                                                                                                                                                                                                                                                                                                                                                                                                                                                                                                                                                                                                                    |                                                                                                                                                                                                                                                                                                                     |
| EPI_ISL_9459445                                                                                                                                                                                                                                                                                                                                                                                                                                                                                                                                                                                                                                                                                                                                                                             | SYNLAB MVZ Hamburg                                               | Robert Koch Institute                                                                                                                                                                                               |                                                                                                                                                                                                                                                                                                                                                                                                                                                                                                                                                                                                                                                                                                          |                                                                                                                                                                                                                                                                                                                     |
| EPI_ISL_9450369, EPI_ISL_9450510, EPI_ISL_9450639, EPI_ISL_9452703, EPI_ISL_9453037, EPI_ISL_9453111, EPI_ISL_9453209, EPI_ISL_9453225, EPI_ISL_9453389, EPI_ISL_9453468, EPI_ISL_9453658, EPI_ISL_9453684, EPI_ISL_9453693, EPI_ISL_9453937, EPI_ISL_9453964, EPI_ISL_9454279, EPI_ISL_9454481, EPI_ISL_9454729, EPI_ISL_9459478, EPI_ISL_9460039, EPI_ISL_9460064, EPI_ISL_9460077, EPI_ISL_9460198, EPI_ISL_9460372, EPI_ISL_9460386, EPI_ISL_9460403, EPI_ISL_9715466, EPI_ISL_9715528, EPI_ISL_9715549, EPI_ISL_9715594, EPI_ISL_9715622, EPI_ISL_9715661                                                                                                                                                                                                                              |                                                                  |                                                                                                                                                                                                                     |                                                                                                                                                                                                                                                                                                                                                                                                                                                                                                                                                                                                                                                                                                          |                                                                                                                                                                                                                                                                                                                     |

|                                                                                                                                                                                                                                                                                                                                                                                                                                                                                                                                                                                                                                                                                                                                                                                                                                                                                                                                                                                                                                                                                                                                                                                                                                      |                                                                                               |                                                                                                                                                                                              |                                                                                                                                                                                                                                                                                                              |
|--------------------------------------------------------------------------------------------------------------------------------------------------------------------------------------------------------------------------------------------------------------------------------------------------------------------------------------------------------------------------------------------------------------------------------------------------------------------------------------------------------------------------------------------------------------------------------------------------------------------------------------------------------------------------------------------------------------------------------------------------------------------------------------------------------------------------------------------------------------------------------------------------------------------------------------------------------------------------------------------------------------------------------------------------------------------------------------------------------------------------------------------------------------------------------------------------------------------------------------|-----------------------------------------------------------------------------------------------|----------------------------------------------------------------------------------------------------------------------------------------------------------------------------------------------|--------------------------------------------------------------------------------------------------------------------------------------------------------------------------------------------------------------------------------------------------------------------------------------------------------------|
| see above                                                                                                                                                                                                                                                                                                                                                                                                                                                                                                                                                                                                                                                                                                                                                                                                                                                                                                                                                                                                                                                                                                                                                                                                                            | SYNLAB MVZ Leinfelden-Echterdingen                                                            | Robert Koch Institute                                                                                                                                                                        |                                                                                                                                                                                                                                                                                                              |
| EPI_ISL_9450193, EPI_ISL_9450541, EPI_ISL_9453177, EPI_ISL_9454038, EPI_ISL_9454699, EPI_ISL_9459988, EPI_ISL_9459996, EPI_ISL_9460028, EPI_ISL_9460047, EPI_ISL_9460147, EPI_ISL_9460149, EPI_ISL_9460300, EPI_ISL_9460337, EPI_ISL_9460415, EPI_ISL_9462951, EPI_ISL_9462965, EPI_ISL_9462969, EPI_ISL_9463210, EPI_ISL_9463252, EPI_ISL_9463304, EPI_ISL_9463324, EPI_ISL_9463335, EPI_ISL_9463336, EPI_ISL_9714432, EPI_ISL_9715454, EPI_ISL_9715510, EPI_ISL_9715563, EPI_ISL_9715678                                                                                                                                                                                                                                                                                                                                                                                                                                                                                                                                                                                                                                                                                                                                           |                                                                                               |                                                                                                                                                                                              |                                                                                                                                                                                                                                                                                                              |
| see above                                                                                                                                                                                                                                                                                                                                                                                                                                                                                                                                                                                                                                                                                                                                                                                                                                                                                                                                                                                                                                                                                                                                                                                                                            | SYNLAB MVZ Trier                                                                              | Robert Koch Institute                                                                                                                                                                        |                                                                                                                                                                                                                                                                                                              |
| EPI_ISL_9460267, EPI_ISL_9460654, EPI_ISL_9463227, EPI_ISL_9463260, EPI_ISL_9463339                                                                                                                                                                                                                                                                                                                                                                                                                                                                                                                                                                                                                                                                                                                                                                                                                                                                                                                                                                                                                                                                                                                                                  | SYNLAB MVZ Weiden                                                                             | Robert Koch Institute                                                                                                                                                                        |                                                                                                                                                                                                                                                                                                              |
| EPI_ISL_9652515, EPI_ISL_9652516                                                                                                                                                                                                                                                                                                                                                                                                                                                                                                                                                                                                                                                                                                                                                                                                                                                                                                                                                                                                                                                                                                                                                                                                     | Salvous Bioresearch Solutions, Gandhidham, Kutch                                              | Gujarat Biotechnology Research Centre                                                                                                                                                        | Akhilesh Modi; Apurvasinh Puvar; Bhadreshsinh Gohil; Chaitanya Joshi; Disha Vora; Janvi Raval; Jaykumar Rangani; Madhvi Joshi; Mittal Shah; Nimesh Patel; Nitin Savaliya; NitinShukla; Priyank Chavda; Ramesh Pandit; Roshani Mishra; Sonal Sharma; Tasnim Trivedi; Zarna Patel                              |
| EPI_ISL_9618124, EPI_ISL_9652518                                                                                                                                                                                                                                                                                                                                                                                                                                                                                                                                                                                                                                                                                                                                                                                                                                                                                                                                                                                                                                                                                                                                                                                                     | Sanjeevani Metropolis, Rajkot                                                                 | Gujarat Biotechnology Research Centre                                                                                                                                                        | Akhilesh Modi; Apurvasinh Puvar; Bhadreshsinh Gohil; Chaitanya Joshi; Disha Vora; Janvi Raval; Jaykumar Rangani; Madhvi Joshi; Nimesh Patel; Nitin Savaliya; NitinShukla; Priyank Chavda; Ramesh Pandit; Roshani Mishra; Shafquat Jahan; Sonal Sharma; Tasnim Trivedi; Zarna Patel                           |
| EPI_ISL_9781622, EPI_ISL_9781645, EPI_ISL_9781647, EPI_ISL_9781653, EPI_ISL_9781666, EPI_ISL_9781667, EPI_ISL_9781673                                                                                                                                                                                                                                                                                                                                                                                                                                                                                                                                                                                                                                                                                                                                                                                                                                                                                                                                                                                                                                                                                                                |                                                                                               |                                                                                                                                                                                              |                                                                                                                                                                                                                                                                                                              |
| see above                                                                                                                                                                                                                                                                                                                                                                                                                                                                                                                                                                                                                                                                                                                                                                                                                                                                                                                                                                                                                                                                                                                                                                                                                            | School of Tropical Medicine, Kolkata                                                          | CSIR-Indian Institute of Chemical Biology                                                                                                                                                    | Arun Bandyopadhyay; INSAOCG; Partha Chakrabarti; Poulomi Sarkar; Saikat Chakrabarti; Sarthak Banerjee; Siddik Sarkar                                                                                                                                                                                         |
| EPI_ISL_9571492                                                                                                                                                                                                                                                                                                                                                                                                                                                                                                                                                                                                                                                                                                                                                                                                                                                                                                                                                                                                                                                                                                                                                                                                                      | Servicio Virosis Respiratorias-Departamento Virologia-INEI                                    | Instituto Nacional Enfermedades Infecciosas C.G.Madras                                                                                                                                       | Avaro M.; Baumeister E.; Benedetti E.; Campos J.; Cisterna D.; Dattero ME; De Belder D.; Haim MS.; Lorenzo F.; Molina V.; Perandones C.; Poklepovich T.; Pontoriero A.; Russo M.; Sanchez Loria J.; Tuduri E.                                                                                                |
| EPI_ISL_9588124, EPI_ISL_9588143, EPI_ISL_9588145, EPI_ISL_9588156, EPI_ISL_9588160, EPI_ISL_9588193, EPI_ISL_9588224, EPI_ISL_9588225, EPI_ISL_9588245, EPI_ISL_9588258, EPI_ISL_9588269, EPI_ISL_9588271, EPI_ISL_9588337, EPI_ISL_9590238, EPI_ISL_9590243, EPI_ISL_9591291, EPI_ISL_9591355, EPI_ISL_9591356, EPI_ISL_9591397, EPI_ISL_9591409, EPI_ISL_9591425, EPI_ISL_9591481, EPI_ISL_9591483, EPI_ISL_9591520, EPI_ISL_9591534, EPI_ISL_9591534, EPI_ISL_9592251, EPI_ISL_9592253, EPI_ISL_9592254, EPI_ISL_9592266, EPI_ISL_9592287, EPI_ISL_9592289, EPI_ISL_9592362, EPI_ISL_9592368, EPI_ISL_9592380, EPI_ISL_9592389, EPI_ISL_9592403, EPI_ISL_9592409, EPI_ISL_9592410, EPI_ISL_9592423, EPI_ISL_9592425, EPI_ISL_9592429, EPI_ISL_9592445, EPI_ISL_9592455, EPI_ISL_9592480, EPI_ISL_9592514, EPI_ISL_9592596, EPI_ISL_9592597, EPI_ISL_9592606, EPI_ISL_9592651, EPI_ISL_9592651, EPI_ISL_9592651, EPI_ISL_9592724, EPI_ISL_9592743, EPI_ISL_9592753, EPI_ISL_9592787, EPI_ISL_9592789                                                                                                                                                                                                                              |                                                                                               |                                                                                                                                                                                              |                                                                                                                                                                                                                                                                                                              |
| see above                                                                                                                                                                                                                                                                                                                                                                                                                                                                                                                                                                                                                                                                                                                                                                                                                                                                                                                                                                                                                                                                                                                                                                                                                            | Shamir Medical Center (Asaf Harofe)                                                           | Shamir Medical Center (Asaf Harofe)                                                                                                                                                          | Abu Hamad Ramzia; Adina Bar Chaim; Anna Vishnevsky; Chen Weiner; Nir Rainy; Patricia Benveniste-Lekovitz; Reut Sorek Abramovich; Yevgeni Yegorov                                                                                                                                                             |
| EPI_ISL_9506779, EPI_ISL_9651333, EPI_ISL_9651339                                                                                                                                                                                                                                                                                                                                                                                                                                                                                                                                                                                                                                                                                                                                                                                                                                                                                                                                                                                                                                                                                                                                                                                    | Siloam Hospitals TB Simatupang                                                                | Genomik Solidaritas Indonesia Laboratorium                                                                                                                                                   | Anna Christina Brazia; Annisa Muthiah Sukirman; Anuraj Shankar; Ariel Pradipta; Carissa Sintca Wijaya; Dhahlia Agustina Cahyono; Gracia Felias Enos Korompis; Louisa Markus; Mercy Tiarmuali Panjaitan; Meutia Ayuputeri Kumaheri; Reinhart Gabriel; Stefanus Bernard                                        |
| EPI_ISL_9745419, EPI_ISL_9325232                                                                                                                                                                                                                                                                                                                                                                                                                                                                                                                                                                                                                                                                                                                                                                                                                                                                                                                                                                                                                                                                                                                                                                                                     | Sonic - MVZ Medizinisches Labor Bremen GmbH<br>Stadtsptial Waid                               | Robert Koch Institute<br>Institute of Medical Virology, University of Zurich                                                                                                                 | Alexandra Trkola; Annette Audigé; Catharine Aquino; Cyril Shah; Daniel Ehrsam; Gabriela Ziltener; Guido Bloemberg; Hubert Rehrauer; Isabel Stürmer; Joel Wron; Jon Huder; Jürg Böni; Kevin Steiner; Maria Grünberg; Maryam Zaheri; Michael Huber; Riccarda Capaul; Stefan Schmutz; Verena Kufner; Weihong Qi |
| EPI_ISL_9263788, EPI_ISL_9263791, EPI_ISL_9263792, EPI_ISL_9436076                                                                                                                                                                                                                                                                                                                                                                                                                                                                                                                                                                                                                                                                                                                                                                                                                                                                                                                                                                                                                                                                                                                                                                   | State Laboratories Division, Hawaii State Department of Health                                | State Laboratories Division, Hawaii State Department of Health                                                                                                                               | Ayana Garnet; Briana Ofilas; Cheryl-Lynn Daquip; Cheyenne Barela; Daniel Strange; Drew Kuwazaki; Edward Desmond; Jeffrey Au; Mark Nagata; Pamela O'Brien; Razvan Sultana; Remedios Gose; Samantha Cotter; Samantha Sruba                                                                                     |
| EPI_ISL_9618103, EPI_ISL_9618104, EPI_ISL_9618105, EPI_ISL_9618113, EPI_ISL_9618114, EPI_ISL_9618115, EPI_ISL_9618116, EPI_ISL_9652514, EPI_ISL_9652517, EPI_ISL_9652520                                                                                                                                                                                                                                                                                                                                                                                                                                                                                                                                                                                                                                                                                                                                                                                                                                                                                                                                                                                                                                                             |                                                                                               |                                                                                                                                                                                              |                                                                                                                                                                                                                                                                                                              |
| see above                                                                                                                                                                                                                                                                                                                                                                                                                                                                                                                                                                                                                                                                                                                                                                                                                                                                                                                                                                                                                                                                                                                                                                                                                            | Suprattech Micropath Diagnostics & Research laboratory Ahmedabad                              | Gujarat Biotechnology Research Centre                                                                                                                                                        | Akhilesh Modi; Ameer Shukla; Apurvasinh Puvar; Bhadreshsinh Gohil; Chaitanya Joshi; Disha Vora; Janvi Raval; Jaykumar Rangani; Madhvi Joshi; Nimesh Patel; Nitin Savaliya; NitinShukla; Priyank Chavda; Ramesh Pandit; Roshani Mishra; Sonal Sharma; Tasnim Trivedi; Zarna Patel                             |
| EPI_ISL_9696288                                                                                                                                                                                                                                                                                                                                                                                                                                                                                                                                                                                                                                                                                                                                                                                                                                                                                                                                                                                                                                                                                                                                                                                                                      | Surat Municipal Institute of Medical Education and Research (SMIMER), Surat                   | Gujarat Biotechnology Research Centre                                                                                                                                                        | Akhilesh Modi; Apurvasinh Puvar; Bhadreshsinh Gohil; Chaitanya Joshi; Disha Vora; Janvi Raval; Jaykumar Rangani; Madhvi Joshi; Manish Patel; Nimesh Patel; Nitin Savaliya; NitinShukla; Priyank Chavda; Ramesh Pandit; Roshani Mishra; Sonal Sharma; Tasnim Trivedi; Zarna Patel                             |
| EPI_ISL_9416386                                                                                                                                                                                                                                                                                                                                                                                                                                                                                                                                                                                                                                                                                                                                                                                                                                                                                                                                                                                                                                                                                                                                                                                                                      | Sweden, Vastragotaland, Unilabs                                                               | Unilabs, Eskilstuna, Sweden                                                                                                                                                                  | Emma Arvidsson                                                                                                                                                                                                                                                                                               |
| EPI_ISL_9511698, EPI_ISL_9511703, EPI_ISL_9511704, EPI_ISL_9511707, EPI_ISL_9511708, EPI_ISL_9511711, EPI_ISL_9511712, EPI_ISL_9511713, EPI_ISL_9511714, EPI_ISL_9511715, EPI_ISL_9511716, EPI_ISL_9511717, EPI_ISL_9511719, EPI_ISL_9511720, EPI_ISL_9511721, EPI_ISL_9511723, EPI_ISL_9511728, EPI_ISL_9511729, EPI_ISL_9511752, EPI_ISL_9511757, EPI_ISL_9511765, EPI_ISL_9511766, EPI_ISL_9511776, EPI_ISL_9511791, EPI_ISL_9511814, EPI_ISL_9511821, EPI_ISL_9511829, EPI_ISL_9511835, EPI_ISL_9511861, EPI_ISL_9511876, EPI_ISL_9511878, EPI_ISL_9511879, EPI_ISL_9511883, EPI_ISL_9511884, EPI_ISL_9511885, EPI_ISL_9511886, EPI_ISL_9511889, EPI_ISL_9511891, EPI_ISL_9511892, EPI_ISL_9511893, EPI_ISL_9511894, EPI_ISL_9511898, EPI_ISL_9511901, EPI_ISL_9511906, EPI_ISL_9511907, EPI_ISL_9511914, EPI_ISL_9511915, EPI_ISL_9511917, EPI_ISL_9511918, EPI_ISL_9511919, EPI_ISL_9511923, EPI_ISL_9511932, EPI_ISL_9511933, EPI_ISL_9511935, EPI_ISL_9511936, EPI_ISL_9511938, EPI_ISL_9511942, EPI_ISL_9511945, EPI_ISL_9511957, EPI_ISL_9511958, EPI_ISL_9511965, EPI_ISL_9511966, EPI_ISL_9511976, EPI_ISL_9511977, EPI_ISL_9511981, EPI_ISL_9511983, EPI_ISL_9511984, EPI_ISL_9511985, EPI_ISL_9511990, EPI_ISL_9511992 |                                                                                               |                                                                                                                                                                                              |                                                                                                                                                                                                                                                                                                              |
| see above                                                                                                                                                                                                                                                                                                                                                                                                                                                                                                                                                                                                                                                                                                                                                                                                                                                                                                                                                                                                                                                                                                                                                                                                                            | Sweden/Sodermanland/Unilabs                                                                   | Unilabs/Eskilstuna/Sweden                                                                                                                                                                    | Emma Arvidsson                                                                                                                                                                                                                                                                                               |
| EPI_ISL_9511724, EPI_ISL_9511778, EPI_ISL_9511811, EPI_ISL_9511926, EPI_ISL_9511959, EPI_ISL_9696658, EPI_ISL_9696664, EPI_ISL_9696703, EPI_ISL_9696707, EPI_ISL_9696712, EPI_ISL_9696723, EPI_ISL_9696727, EPI_ISL_9696733, EPI_ISL_9696738, EPI_ISL_9696746, EPI_ISL_9696748, EPI_ISL_9696752, EPI_ISL_9696754, EPI_ISL_9696759, EPI_ISL_9696762, EPI_ISL_9696766, EPI_ISL_9696767, EPI_ISL_9696770, EPI_ISL_9696772, EPI_ISL_9696775, EPI_ISL_9696778, EPI_ISL_9696781, EPI_ISL_9696792, EPI_ISL_9696799, EPI_ISL_9696800, EPI_ISL_9696806, EPI_ISL_9696810, EPI_ISL_9696815, EPI_ISL_9696818, EPI_ISL_9696820, EPI_ISL_9696826, EPI_ISL_9696836, EPI_ISL_9696838, EPI_ISL_9696841, EPI_ISL_9696843, EPI_ISL_9696844, EPI_ISL_9696847, EPI_ISL_9696848, EPI_ISL_9696850, EPI_ISL_9696853, EPI_ISL_9696855, EPI_ISL_9696856, EPI_ISL_9696861, EPI_ISL_9696862, EPI_ISL_9696865, EPI_ISL_9696868, EPI_ISL_9696872, EPI_ISL_9696874, EPI_ISL_9696875, EPI_ISL_9696876, EPI_ISL_9696878, EPI_ISL_9696880, EPI_ISL_9696890, EPI_ISL_9696891, EPI_ISL_9696892, EPI_ISL_9696896                                                                                                                                                          |                                                                                               |                                                                                                                                                                                              |                                                                                                                                                                                                                                                                                                              |
| see above                                                                                                                                                                                                                                                                                                                                                                                                                                                                                                                                                                                                                                                                                                                                                                                                                                                                                                                                                                                                                                                                                                                                                                                                                            | Sweden/Vastragotaland/Unilabs                                                                 | Unilabs/Eskilstuna/Sweden                                                                                                                                                                    | Emma Arvidsson                                                                                                                                                                                                                                                                                               |
| EPI_ISL_9450158, EPI_ISL_9450317, EPI_ISL_9450422, EPI_ISL_9450565, EPI_ISL_9450611, EPI_ISL_9451194, EPI_ISL_9451470, EPI_ISL_9451482, EPI_ISL_9451554, EPI_ISL_9451888, EPI_ISL_9452032, EPI_ISL_9454496, EPI_ISL_9460035, EPI_ISL_9460772, EPI_ISL_9462968, EPI_ISL_9463181, EPI_ISL_9463211, EPI_ISL_9463214, EPI_ISL_9463231, EPI_ISL_9463240, EPI_ISL_9715458, EPI_ISL_9715569, EPI_ISL_9715581                                                                                                                                                                                                                                                                                                                                                                                                                                                                                                                                                                                                                                                                                                                                                                                                                                |                                                                                               |                                                                                                                                                                                              |                                                                                                                                                                                                                                                                                                              |
| see above                                                                                                                                                                                                                                                                                                                                                                                                                                                                                                                                                                                                                                                                                                                                                                                                                                                                                                                                                                                                                                                                                                                                                                                                                            | Synlab MVZ Augsburg                                                                           | Robert Koch Institute                                                                                                                                                                        |                                                                                                                                                                                                                                                                                                              |
| EPI_ISL_9748792, EPI_ISL_9748805                                                                                                                                                                                                                                                                                                                                                                                                                                                                                                                                                                                                                                                                                                                                                                                                                                                                                                                                                                                                                                                                                                                                                                                                     | Szpital Powiatowy w Chrzanowie                                                                | 1. Academic Center for Pathomorphological and Genetic-Molecular Diagnostics Ltd, Białystok, Poland<br>2. National Institute of Public Health - National Institute of Hygiene, Warsaw, Poland | Anetta Sulewska; Jacek Nikliński; Janusz Dzięciół; Joanna Kiśluk; Katarzyna Zacharczuk; Konrad Raczkowski; Magdalena Nowakowska; Małgorzata Sadkowska-Todys; Piotr Karabowicz; Piotr Majewski; Przemysław Bieчек. Joanna Reszeć; Radosław Charkiewicz; Tomasz Wołkowicz                                      |
| EPI_ISL_9748844                                                                                                                                                                                                                                                                                                                                                                                                                                                                                                                                                                                                                                                                                                                                                                                                                                                                                                                                                                                                                                                                                                                                                                                                                      | Szpital Specjalistyczny im. H. Klimontowicza Medyczne Laboratorium Mikrobiologiczne           | 1. Academic Center for Pathomorphological and Genetic-Molecular Diagnostics Ltd, Białystok, Poland<br>2. National Institute of Public Health - National Institute of Hygiene, Warsaw, Poland | Anetta Sulewska; Jacek Nikliński; Janusz Dzięciół; Joanna Kiśluk; Katarzyna Zacharczuk; Konrad Raczkowski; Magdalena Nowakowska; Małgorzata Sadkowska-Todys; Piotr Karabowicz; Piotr Majewski; Przemysław Bieчек. Joanna Reszeć; Radosław Charkiewicz; Tomasz Wołkowicz                                      |
| EPI_ISL_9713021, EPI_ISL_9713025                                                                                                                                                                                                                                                                                                                                                                                                                                                                                                                                                                                                                                                                                                                                                                                                                                                                                                                                                                                                                                                                                                                                                                                                     | Teresa Fryda Laboratorium Medyczne Sp. z o.o.                                                 | 1. Academic Center for Pathomorphological and Genetic-Molecular Diagnostics Ltd, Białystok, Poland<br>2. National Institute of Public Health - National Institute of Hygiene, Warsaw, Poland | Anetta Sulewska; Jacek Nikliński; Janusz Dzięciół; Joanna Kiśluk; Katarzyna Zacharczuk; Konrad Raczkowski; Magdalena Nowakowska; Małgorzata Sadkowska-Todys; Piotr Karabowicz; Piotr Majewski; Przemysław Bieчек. Joanna Reszeć; Radosław Charkiewicz; Tomasz Wołkowicz                                      |
| EPI_ISL_9258782, EPI_ISL_9258784, EPI_ISL_9258814                                                                                                                                                                                                                                                                                                                                                                                                                                                                                                                                                                                                                                                                                                                                                                                                                                                                                                                                                                                                                                                                                                                                                                                    | The Jackson Laboratory                                                                        | The Jackson Laboratory                                                                                                                                                                       | Adams M; Kelly K; Li L; Long E; Omerza G; Renzette N                                                                                                                                                                                                                                                         |
| EPI_ISL_9325415, EPI_ISL_9332889, EPI_ISL_9332921, EPI_ISL_9332924                                                                                                                                                                                                                                                                                                                                                                                                                                                                                                                                                                                                                                                                                                                                                                                                                                                                                                                                                                                                                                                                                                                                                                   | The Ohio State University Applied Microbiology Services Laboratory                            | The Ohio State University Applied Microbiology Services Laboratory                                                                                                                           | Seth A. Faith PhD                                                                                                                                                                                                                                                                                            |
| EPI_ISL_9612691, EPI_ISL_9612711, EPI_ISL_9612713, EPI_ISL_9612714, EPI_ISL_9612715, EPI_ISL_9612716, EPI_ISL_9612717                                                                                                                                                                                                                                                                                                                                                                                                                                                                                                                                                                                                                                                                                                                                                                                                                                                                                                                                                                                                                                                                                                                |                                                                                               |                                                                                                                                                                                              |                                                                                                                                                                                                                                                                                                              |
| see above                                                                                                                                                                                                                                                                                                                                                                                                                                                                                                                                                                                                                                                                                                                                                                                                                                                                                                                                                                                                                                                                                                                                                                                                                            | Toprani Advance lab Systems, Vadodara                                                         | Gujarat Biotechnology Research Centre                                                                                                                                                        | Akhilesh Modi; Apurvasinh Puvar; Bhadreshsinh Gohil; Chaitanya Joshi; Disha Vora; Janvi Raval; Jaykumar Rangani; Madhvi Joshi; Nimesh Patel; Nitin Savaliya; NitinShukla; Priyank Chavda; Ramesh Pandit; Roshani Mishra; Sonal Sharma; Tasnim Trivedi; Tushtar Toprani; Zarna Patel                          |
| EPI_ISL_9346292                                                                                                                                                                                                                                                                                                                                                                                                                                                                                                                                                                                                                                                                                                                                                                                                                                                                                                                                                                                                                                                                                                                                                                                                                      | Tulane University School of Medicine                                                          | Tulane University School of Medicine                                                                                                                                                         | Di Tian                                                                                                                                                                                                                                                                                                      |
| EPI_ISL_9551425, EPI_ISL_9551440                                                                                                                                                                                                                                                                                                                                                                                                                                                                                                                                                                                                                                                                                                                                                                                                                                                                                                                                                                                                                                                                                                                                                                                                     | UC Davis Genome Center                                                                        | UC Davis Genome Center                                                                                                                                                                       | UC Davis Genome Center                                                                                                                                                                                                                                                                                       |
| EPI_ISL_9606350                                                                                                                                                                                                                                                                                                                                                                                                                                                                                                                                                                                                                                                                                                                                                                                                                                                                                                                                                                                                                                                                                                                                                                                                                      | ULS Castelo Branco                                                                            | Instituto Nacional de Saude (INSA)                                                                                                                                                           | Borges et al                                                                                                                                                                                                                                                                                                 |
| EPI_ISL_9433170                                                                                                                                                                                                                                                                                                                                                                                                                                                                                                                                                                                                                                                                                                                                                                                                                                                                                                                                                                                                                                                                                                                                                                                                                      | UMC Groningen, Clinical Virology, Department of Medical Microbiology and Infection Prevention | UMC Groningen, Clinical Virology, Department of Medical Microbiology and Infection Prevention                                                                                                | Alexander Friedrich; Coretta Van Leer-Buter; Erley Lizarazo-Forero; Hubert Niesters; Lilli Gard; Marjolein Knoester; Monika Fliss; Sigrid Rosema; Xuewei Zhou                                                                                                                                                |
| EPI_ISL_9606358, EPI_ISL_9606359, EPI_ISL_9606360                                                                                                                                                                                                                                                                                                                                                                                                                                                                                                                                                                                                                                                                                                                                                                                                                                                                                                                                                                                                                                                                                                                                                                                    | UNILABS                                                                                       | Instituto Nacional de Saude (INSA)                                                                                                                                                           | Borges et al                                                                                                                                                                                                                                                                                                 |
| EPI_ISL_9481615, EPI_ISL_9481616                                                                                                                                                                                                                                                                                                                                                                                                                                                                                                                                                                                                                                                                                                                                                                                                                                                                                                                                                                                                                                                                                                                                                                                                     | USC Clinical Lab                                                                              | Los Angeles County Public Health Laboratories                                                                                                                                                | A.R. Gener et al.                                                                                                                                                                                                                                                                                            |
| EPI_ISL_9594593, EPI_ISL_9594594, EPI_ISL_9594597, EPI_ISL_9594600, EPI_ISL_9594789                                                                                                                                                                                                                                                                                                                                                                                                                                                                                                                                                                                                                                                                                                                                                                                                                                                                                                                                                                                                                                                                                                                                                  | UW Virology Lab                                                                               | UW Virology Lab                                                                                                                                                                              | Alexander Greninger; Hong Xie; Isabel Arnould; Keith R Jerome; Meei-Li Huang; Nathan Breit; Patrick Mathias; Pavitra Roychoudhury; Pooneh Hajian; Ricardo Perez; Robert J. Livingston; Sean Ellis; Seffir T. Wendm; Shah Mohamed Bakhsh                                                                      |
| EPI_ISL_9459398, EPI_ISL_9459407, EPI_ISL_9719288, EPI_ISL_9719299, EPI_ISL_9719401                                                                                                                                                                                                                                                                                                                                                                                                                                                                                                                                                                                                                                                                                                                                                                                                                                                                                                                                                                                                                                                                                                                                                  | Uniklinikum Regensburg; Institut für klinische Mikrobiologie und Hygiene                      | Robert Koch Institute                                                                                                                                                                        |                                                                                                                                                                                                                                                                                                              |



|                                                                                                                                                                                                                                              |                                                                                                        |                                                                                                                                                                                                                      |                                                                                                                                                                                                                                                                                                                                                                                                                                                                                                                                                                                                                                                                                                                             |
|----------------------------------------------------------------------------------------------------------------------------------------------------------------------------------------------------------------------------------------------|--------------------------------------------------------------------------------------------------------|----------------------------------------------------------------------------------------------------------------------------------------------------------------------------------------------------------------------|-----------------------------------------------------------------------------------------------------------------------------------------------------------------------------------------------------------------------------------------------------------------------------------------------------------------------------------------------------------------------------------------------------------------------------------------------------------------------------------------------------------------------------------------------------------------------------------------------------------------------------------------------------------------------------------------------------------------------------|
| EPI_ISL_9512731                                                                                                                                                                                                                              | University Hospitals of Geneva, Laboratory of Virology                                                 | HUG, Laboratory of Virology and the Health2030 Genome Center                                                                                                                                                         | Aline Mamin; Ana Rita Goncalves; Cedric Howald; Deborah Penet; Francisco Perez; Henri Pegeot; Ioannis Xenarios; Keith Harshman; Laurent Kaiser; Lorenzo Cerutti; Melysa Elies; Samuel Cordey                                                                                                                                                                                                                                                                                                                                                                                                                                                                                                                                |
| EPI_ISL_9439354, EPI_ISL_9439359, EPI_ISL_9439364, EPI_ISL_9439379                                                                                                                                                                           | Università degli Studi di Perugia                                                                      | Istituto Zooprofilattico Sperimentale dell'Umbria e Molise "G. Caporale"                                                                                                                                             | Ancora M; Biagetti M; Calistri P; Camilloni B; Cammà C; Curini V; Delli Compagni E; Di Domenico M; Di Pasquale A; Giammarioli M; Lorusso A; Mangone I; Marccacci M; Mencacci A; Puglia I; Rinaldi A; Savini G; Scialabba S                                                                                                                                                                                                                                                                                                                                                                                                                                                                                                  |
| EPI_ISL_9325093                                                                                                                                                                                                                              | Universität Zürich                                                                                     | Institute of Medical Virology, University of Zurich                                                                                                                                                                  | Alexandra Trkola; Annette Audigé; Catharine Aquino; Cyril Shah; Daniel Ehrsam; Gabriela Ziltener; Guido Bloemberg; Hubert Rehrauer; Isabel Stürmer; Joel Wirz; Jon Huder; Jürg Böni; Kevin Steiner; Maria Grünberg; Maryam Zaheri; Michael Huber; Riccarda Capaul; Stefan Schmutz; Verena Küfner; Weihong Qi                                                                                                                                                                                                                                                                                                                                                                                                                |
| EPI_ISL_9325116                                                                                                                                                                                                                              | UniversitätsSpital Zürich                                                                              | Institute of Medical Virology, University of Zurich                                                                                                                                                                  | Alexandra Trkola; Annette Audigé; Catharine Aquino; Cyril Shah; Daniel Ehrsam; Gabriela Ziltener; Guido Bloemberg; Hubert Rehrauer; Isabel Stürmer; Joel Wirz; Jon Huder; Jürg Böni; Kevin Steiner; Maria Grünberg; Maryam Zaheri; Michael Huber; Riccarda Capaul; Stefan Schmutz; Verena Küfner; Weihong Qi                                                                                                                                                                                                                                                                                                                                                                                                                |
| EPI_ISL_9719555                                                                                                                                                                                                                              | Universitätsklinikum Ulm - Institut für Virologie                                                      | Robert Koch Institute                                                                                                                                                                                                |                                                                                                                                                                                                                                                                                                                                                                                                                                                                                                                                                                                                                                                                                                                             |
| EPI_ISL_9376220, EPI_ISL_9673470, EPI_ISL_9673478, EPI_ISL_9673503                                                                                                                                                                           | Uniwersyteckie Centrum Kliniczne                                                                       | 1. Tricity SARS-CoV-2 sequencing consortium: University of Gdansk, Medical University of Gdansk, Vaxican Ltd., Invicta Ltd. 2. National Institute of Public Health - National Institute of Hygiene, Warsaw, Poland   | Celina Cybulska; Karolina Gackowska; Katarzyna Groth; Katarzyna Zacharczuk; Krystyna Bienkowska Szewczyk; Lukasz Rabalski; Maciej Grzybek; Maciej Kosinski; Magdalena Nowakowska; Marcin Lubocki; Małgorzata Sadkowska-Todys; Tomasz Wołkowicz                                                                                                                                                                                                                                                                                                                                                                                                                                                                              |
| EPI_ISL_9687925                                                                                                                                                                                                                              | Uniwersytet Medyczny im. Karola Marcinkowskiego w Poznaniu                                             | 1. Academic Center for Pathomorphological and Genetic-Molecular Diagnostics Ltd, Białystok, Poland<br>2. National Institute of Public Health - National Institute of Hygiene, Warsaw, Poland                         | Anetta Sulewska; Jacek Nikliński; Janusz Dzieciol; Joanna Kiśluk; Katarzyna Zacharczuk; Konrad Raczkowski; Magdalena Nowakowska; Małgorzata Sadkowska-Todys; Piotr Karabowicz; Piotr Majewski; Przemysław Bieчек. Joanna Reszeć; Radosław Charkiewicz; Tomasz Wołkowicz                                                                                                                                                                                                                                                                                                                                                                                                                                                     |
| EPI_ISL_9705837                                                                                                                                                                                                                              | VITALABO Laboratoria Medyczne Sp. z o.o.                                                               | 119. Tricity SARS-CoV-2 sequencing consortium: University of Gdansk, Medical University of Gdansk, Vaxican Ltd., Invicta Ltd. 2. National Institute of Public Health - National Institute of Hygiene, Warsaw, Poland | Celina Cybulska; Karolina Gackowska; Katarzyna Groth; Katarzyna Zacharczuk; Krystyna Bienkowska Szewczyk; Lukasz Rabalski; Maciej Grzybek; Maciej Kosinski; Magdalena Nowakowska; Marcin Lubocki; Małgorzata Sadkowska-Todys; Tomasz Wołkowicz                                                                                                                                                                                                                                                                                                                                                                                                                                                                              |
| EPI_ISL_9705839                                                                                                                                                                                                                              | VITALABO Laboratoria Medyczne Sp. z o.o.                                                               | 121. Tricity SARS-CoV-2 sequencing consortium: University of Gdansk, Medical University of Gdansk, Vaxican Ltd., Invicta Ltd. 2. National Institute of Public Health - National Institute of Hygiene, Warsaw, Poland | Celina Cybulska; Karolina Gackowska; Katarzyna Groth; Katarzyna Zacharczuk; Krystyna Bienkowska Szewczyk; Lukasz Rabalski; Maciej Grzybek; Maciej Kosinski; Magdalena Nowakowska; Marcin Lubocki; Małgorzata Sadkowska-Todys; Tomasz Wołkowicz                                                                                                                                                                                                                                                                                                                                                                                                                                                                              |
| EPI_ISL_9705844                                                                                                                                                                                                                              | VITALABO Laboratoria Medyczne Sp. z o.o.                                                               | 126. Tricity SARS-CoV-2 sequencing consortium: University of Gdansk, Medical University of Gdansk, Vaxican Ltd., Invicta Ltd. 2. National Institute of Public Health - National Institute of Hygiene, Warsaw, Poland | Celina Cybulska; Karolina Gackowska; Katarzyna Groth; Katarzyna Zacharczuk; Krystyna Bienkowska Szewczyk; Lukasz Rabalski; Maciej Grzybek; Maciej Kosinski; Magdalena Nowakowska; Marcin Lubocki; Małgorzata Sadkowska-Todys; Tomasz Wołkowicz                                                                                                                                                                                                                                                                                                                                                                                                                                                                              |
| EPI_ISL_9771987, EPI_ISL_9772104, EPI_ISL_9772190, EPI_ISL_9772274, EPI_ISL_9773021                                                                                                                                                          | Viollier AG                                                                                            | Department of Biosystems Science and Engineering, ETH Zürich                                                                                                                                                         | Andrea Patrignani; Andrea Patrizia Salzmann; Andrea Cabral de Gouvea; Catharine Aquino Fournier; Chaoran Chen; Christian Beisel; Christian Urban; Christiane Beckmann; Christoph Noppen; Daniel Ehrsam; David Dreifuss; Doris Popovic; Elodie Burcklen; Franziska Singer; Griffin White; Hai Bui; Henriette Kurth; Ina Nissen; Isabel Stürmer; Ivan Topolsky; Jay Tracy; Kim Philipp Jablonski; Lara Fuhrmann; Laura Neff; Lennart Opitz; Louis du Plessis; Maria Domenica Moccia; Matteo Carrara; Maurice Redondo; Mirjam Feldkamp; Natascha Santacroce; Niko Beerenwinkel; Olivier Kobel; Pelin Icer; Ralph Schlapbach; Rebecca Denes; Sarah Nadeau; Shuqing Yu; Simon Grüter; Tanja Stadler; Timothy Sykes; Tobias Schär |
| EPI_ISL_9588367                                                                                                                                                                                                                              | Virology Laboratory, International Centre for Diarrhoeal Disease Research, Bangladesh (ICDDR,B)        | Virology Laboratory, International Centre for Diarrhoeal Disease Research, Bangladesh (ICDDR,B)                                                                                                                      | ASM Alamgir; Ahmed Nawsher Alam; Dinesh Mondal; Firdausi Qadri; Hassan Afrad; Mahbubur Rahman; Manjur Hossain Khan; Md. Mahfuzur Rahman; Mohammad Enayet Hossain; Mohammad Jubair; Mohammad Shahidul Islam; Mohammed Ziaur Rahman; Moju Nu Miah; Mustafizur Rahman; Rashedul Hasan; Razib Mazumder; Samir Kumar Saha; Senjuti Saha; Tahmina Shirin                                                                                                                                                                                                                                                                                                                                                                          |
| EPI_ISL_9437933                                                                                                                                                                                                                              | Virology Laboratory, NAPH, Moldova                                                                     | Virology Laboratory, NAPH, Moldova                                                                                                                                                                                   | Apostol Mariana; Cataraga Alina; Colac Svetlana                                                                                                                                                                                                                                                                                                                                                                                                                                                                                                                                                                                                                                                                             |
| EPI_ISL_9463520, EPI_ISL_9463534, EPI_ISL_9463535, EPI_ISL_9463536, EPI_ISL_9463549, EPI_ISL_9463555                                                                                                                                         | Virology Unit, Institut Pasteur du Cambodge                                                            | Virology Unit, Institut Pasteur du Cambodge                                                                                                                                                                          | Cecile Troupin; Chau Darapeak; Chin Savuth; Erik A Karlsson; Jurje Y Siegers; Kraing Sidonn; Leakhena Pum; Ly Sovann; Sophoannedeth Rath; Veasna Duong; Yi Sengdoeurm                                                                                                                                                                                                                                                                                                                                                                                                                                                                                                                                                       |
| EPI_ISL_9191499                                                                                                                                                                                                                              | Virology, Universitätsklinikum des Saarlandes                                                          | Epigenetics, Saarland University                                                                                                                                                                                     | Barbara Berko-Göttel Sascha Tierling; Jörn Walter; Kathrin Kattler; Sigrun Smola; Thorsten Pfuhl                                                                                                                                                                                                                                                                                                                                                                                                                                                                                                                                                                                                                            |
| EPI_ISL_9713600, EPI_ISL_9748783, EPI_ISL_9748853                                                                                                                                                                                            | Vitomed Sp. z o.o.                                                                                     | 1. Academic Center for Pathomorphological and Genetic-Molecular Diagnostics Ltd, Białystok, Poland<br>2. National Institute of Public Health - National Institute of Hygiene, Warsaw, Poland                         | Anetta Sulewska; Jacek Nikliński; Janusz Dzieciol; Joanna Kiśluk; Katarzyna Zacharczuk; Konrad Raczkowski; Magdalena Nowakowska; Małgorzata Sadkowska-Todys; Piotr Karabowicz; Piotr Majewski; Przemysław Bieчек. Joanna Reszeć; Radosław Charkiewicz; Tomasz Wołkowicz                                                                                                                                                                                                                                                                                                                                                                                                                                                     |
| EPI_ISL_9352598                                                                                                                                                                                                                              | WSSE w Lodzi                                                                                           | Wojewodzka Stacja Sanitarno-Epidemiologiczna w Lodzi, Oddzial Laboratoryjny Mikrobiologii i Parazytologii                                                                                                            | Agnieszka Karnowska; Aleksandra Krawczyk; Danuta Bartczak; Elian Terpo; Katarzyna Kosowska; Lucyna Kochanowska; Marta Gawronska; Martyna Matera; Szymon Konkolewski                                                                                                                                                                                                                                                                                                                                                                                                                                                                                                                                                         |
| EPI_ISL_9489473, EPI_ISL_9489488, EPI_ISL_9489490, EPI_ISL_9489497, EPI_ISL_9489509, EPI_ISL_9489512, EPI_ISL_9502952, EPI_ISL_9502958, EPI_ISL_9502966, EPI_ISL_9503111, EPI_ISL_9503228, EPI_ISL_9503246, EPI_ISL_9618339, EPI_ISL_9618345 | see above                                                                                              | Wojewodzka Stacja Sanitarno-Epidemiologiczna w Olsztynie, Laboratorium Badan Epidemiologiczno-Klinicznych                                                                                                            | Aleksandra Kobiatko; Barbara Dolinska; Emilia Tarabasz; Ewa Liszewska; Marta Lukian; Monika Czerminska; Patryk Bielecki; Paulina Rozycka; Sylwia Krzetowska; Tomasz Jakubczak                                                                                                                                                                                                                                                                                                                                                                                                                                                                                                                                               |
| EPI_ISL_9712805, EPI_ISL_9712808, EPI_ISL_9712811                                                                                                                                                                                            | WSSE w Poznaniu, Laboratorium Mikrobiologii i Parazytologii                                            | 1. Academic Center for Pathomorphological and Genetic-Molecular Diagnostics Ltd, Białystok, Poland<br>2. National Institute of Public Health - National Institute of Hygiene, Warsaw, Poland                         | Anetta Sulewska; Jacek Nikliński; Janusz Dzieciol; Joanna Kiśluk; Katarzyna Zacharczuk; Konrad Raczkowski; Magdalena Nowakowska; Małgorzata Sadkowska-Todys; Piotr Karabowicz; Piotr Majewski; Przemysław Bieчек. Joanna Reszeć; Radosław Charkiewicz; Tomasz Wołkowicz                                                                                                                                                                                                                                                                                                                                                                                                                                                     |
| EPI_ISL_9509652                                                                                                                                                                                                                              | Warsaw Genomics Laboratorium Analiz Genetycznych                                                       | 1. Academic Center for Pathomorphological and Genetic-Molecular Diagnostics Ltd, Białystok, Poland<br>2. National Institute of Public Health - National Institute of Hygiene, Warsaw, Poland                         | Anetta Sulewska; Jacek Nikliński; Janusz Dzieciol; Joanna Kiśluk; Katarzyna Zacharczuk; Konrad Raczkowski; Magdalena Nowakowska; Małgorzata Sadkowska-Todys; Piotr Karabowicz; Piotr Majewski; Przemysław Bieчек. Joanna Reszeć; Radosław Charkiewicz; Tomasz Wołkowicz                                                                                                                                                                                                                                                                                                                                                                                                                                                     |
| EPI_ISL_9461317, EPI_ISL_9357528                                                                                                                                                                                                             | Westpfalz-Klinikum GmbH; Kaiserslautern<br>Wojewodzki Specjalistyczny Szpital im. Dr. Wl. Bieganskiego | Robert Koch Institute<br>Wojewodzka Stacja Sanitarno-Epidemiologiczna w Lodzi, Oddzial Laboratoryjny Mikrobiologii i Parazytologii                                                                                   | Agnieszka Karnowska; Aleksandra Krawczyk; Danuta Bartczak; Elian Terpo; Katarzyna Kosowska; Lucyna Kochanowska; Marta Gawronska; Martyna Matera; Szymon Konkolewski                                                                                                                                                                                                                                                                                                                                                                                                                                                                                                                                                         |
| EPI_ISL_9712849                                                                                                                                                                                                                              | Zakład Diagnostyki Medycznej Sp. z o.o.                                                                | 1. Academic Center for Pathomorphological and Genetic-Molecular Diagnostics Ltd, Białystok, Poland<br>2. National Institute of Public Health - National Institute of Hygiene, Warsaw, Poland                         | Anetta Sulewska; Jacek Nikliński; Janusz Dzieciol; Joanna Kiśluk; Katarzyna Zacharczuk; Konrad Raczkowski; Magdalena Nowakowska; Małgorzata Sadkowska-Todys; Piotr Karabowicz; Piotr Majewski; Przemysław Bieчек. Joanna Reszeć; Radosław Charkiewicz; Tomasz Wołkowicz                                                                                                                                                                                                                                                                                                                                                                                                                                                     |
| EPI_ISL_9748747, EPI_ISL_9748817                                                                                                                                                                                                             | Zakład Genetyki Synevo                                                                                 | 1. Academic Center for Pathomorphological and Genetic-Molecular Diagnostics Ltd, Białystok, Poland<br>2. National Institute of Public Health - National Institute of Hygiene, Warsaw, Poland                         | Anetta Sulewska; Jacek Nikliński; Janusz Dzieciol; Joanna Kiśluk; Katarzyna Zacharczuk; Konrad Raczkowski; Magdalena Nowakowska; Małgorzata Sadkowska-Todys; Piotr Karabowicz; Piotr Majewski; Przemysław Bieчек. Joanna Reszeć; Radosław Charkiewicz; Tomasz Wołkowicz                                                                                                                                                                                                                                                                                                                                                                                                                                                     |
| EPI_ISL_9705879                                                                                                                                                                                                                              | Zakład Patologii Nowotworów i Patomorfologii Centrum Onkologii im. prof. F. Łukaszczyka w Bydgoszczy   | 172. Tricity SARS-CoV-2 sequencing consortium: University of Gdansk, Medical University of Gdansk, Vaxican Ltd., Invicta Ltd. 2. National Institute of Public Health - National Institute of Hygiene, Warsaw, Poland | Celina Cybulska; Karolina Gackowska; Katarzyna Groth; Katarzyna Zacharczuk; Krystyna Bienkowska Szewczyk; Lukasz Rabalski; Maciej Grzybek; Maciej Kosinski; Magdalena Nowakowska; Marcin Lubocki; Małgorzata Sadkowska-Todys; Tomasz Wołkowicz                                                                                                                                                                                                                                                                                                                                                                                                                                                                              |
| EPI_ISL_9705880                                                                                                                                                                                                                              | Zakład Patologii Nowotworów i Patomorfologii Centrum Onkologii im. prof. F. Łukaszczyka w Bydgoszczy   | 174. Tricity SARS-CoV-2 sequencing consortium: University of Gdansk, Medical University of Gdansk, Vaxican Ltd., Invicta Ltd. 2. National Institute of Public Health - National Institute of Hygiene, Warsaw, Poland | Celina Cybulska; Karolina Gackowska; Katarzyna Groth; Katarzyna Zacharczuk; Krystyna Bienkowska Szewczyk; Lukasz Rabalski; Maciej Grzybek; Maciej Kosinski; Magdalena Nowakowska; Marcin Lubocki; Małgorzata Sadkowska-Todys; Tomasz Wołkowicz                                                                                                                                                                                                                                                                                                                                                                                                                                                                              |
| EPI_ISL_9705888                                                                                                                                                                                                                              | Zakład Patologii Nowotworów i Patomorfologii Centrum Onkologii im. prof. F. Łukaszczyka w Bydgoszczy   | 182. Tricity SARS-CoV-2 sequencing consortium: University of Gdansk, Medical University of Gdansk, Vaxican Ltd., Invicta Ltd. 2. National Institute of Public Health - National Institute of Hygiene, Warsaw, Poland | Celina Cybulska; Karolina Gackowska; Katarzyna Groth; Katarzyna Zacharczuk; Krystyna Bienkowska Szewczyk; Lukasz Rabalski; Maciej Grzybek; Maciej Kosinski; Magdalena Nowakowska; Marcin Lubocki; Małgorzata Sadkowska-Todys; Tomasz Wołkowicz                                                                                                                                                                                                                                                                                                                                                                                                                                                                              |

|                                                                                                                                                                                                            |                                                                                                            |                                                                                                                                                                                                                                  |                                                                                                                                                                                                                                                |
|------------------------------------------------------------------------------------------------------------------------------------------------------------------------------------------------------------|------------------------------------------------------------------------------------------------------------|----------------------------------------------------------------------------------------------------------------------------------------------------------------------------------------------------------------------------------|------------------------------------------------------------------------------------------------------------------------------------------------------------------------------------------------------------------------------------------------|
| EPI_ISL_9705892                                                                                                                                                                                            | Zakład Patologii Nowotworów i Patomorfologii<br>Centrum Onkologii im. prof. F. Łukaszczyka w<br>Bydgoszczy | 187. Tricity SARS-CoV-2 sequencing consortium:<br>University of Gdansk, Medical University of Gdansk,<br>Vaxican Ltd., Invicta Ltd. 2. National Institute of<br>Public Health - National Institute of Hygiene,<br>Warsaw, Poland | Celina Cybulska; Karolina Gackowska; Katarzyna Groth; Katarzyna Zacharczuk; Krystyna Bienkowska Szewczyk; Lukasz Rabalski; Maciej Grzybek; Maciej Kosinski; Magdalena Nowakowska; Marcin Lubocki; Małgorzata Sadkowska-Todys; Tomasz Wołkowicz |
| EPI_ISL_9742469                                                                                                                                                                                            | Zavod za javno zdravstvo Koprivničko- Križevačke<br>županije                                               | Hrvatski zavod za javno zdravstvo                                                                                                                                                                                                | Anita Jurić; Dragan Jurić; Irena Tabain; Ivana Ferenčak; Josipa Kuzle                                                                                                                                                                          |
| EPI_ISL_9739498                                                                                                                                                                                            | Zavod za javno zdravstvo Osječko-Baranjske županije                                                        | Hrvatski zavod za javno zdravstvo                                                                                                                                                                                                | Anita Jurić; Dragan Jurić; Irena Tabain; Ivana Ferenčak; Josipa Kuzle                                                                                                                                                                          |
| EPI_ISL_9739378                                                                                                                                                                                            | Zavod za javno zdravstvo Zagrebačke županije                                                               | Hrvatski zavod za javno zdravstvo                                                                                                                                                                                                | Anita Jurić; Dragan Jurić; Irena Tabain; Ivana Ferenčak; Josipa Kuzle                                                                                                                                                                          |
| EPI_ISL_9455543, EPI_ISL_9455555, EPI_ISL_9455583, EPI_ISL_9455629, EPI_ISL_9455641, EPI_ISL_9455644, EPI_ISL_9455837, EPI_ISL_9455850, EPI_ISL_9455851, EPI_ISL_9455914, EPI_ISL_9747438, EPI_ISL_9747489 | see above                                                                                                  | amedes Göttingen                                                                                                                                                                                                                 | Robert Koch Institute                                                                                                                                                                                                                          |
| EPI_ISL_9455996,<br>EPI_ISL_9456008,<br>EPI_ISL_9719689,<br>EPI_ISL_9747070                                                                                                                                | amedes MVZ DIAMEDIS Sennestadt                                                                             | Robert Koch Institute                                                                                                                                                                                                            |                                                                                                                                                                                                                                                |
| EPI_ISL_9719789                                                                                                                                                                                            | amedes MVZ Halle/Leipzig                                                                                   | Robert Koch Institute                                                                                                                                                                                                            |                                                                                                                                                                                                                                                |
| EPI_ISL_9719682,<br>EPI_ISL_9719765                                                                                                                                                                        | amedes MVZ für Laboratoriumsmedizin<br>Fürstentfeldbruck                                                   | Robert Koch Institute                                                                                                                                                                                                            |                                                                                                                                                                                                                                                |
| EPI_ISL_9726228,<br>EPI_ISL_9726287,<br>EPI_ISL_9726458                                                                                                                                                    | labopart - Medizinische Laboratorien Dresden                                                               | Robert Koch Institute                                                                                                                                                                                                            |                                                                                                                                                                                                                                                |



|                 |                                                                    |                                                                                                                                            |                                                                                                                                                                                                                     |                   |                                                                                         |                                                                                                           |                                                                                                                                                                                                                                                                                                                                                                                                                                                                                                                                                                                                                                                                                                  |                 |                 |                 |                 |                 |                 |                                                                                                                                                                                                                                                                                                                                                                                                                                                                                                                                                                                                  |                 |                 |                 |                 |                 |                 |                 |                 |
|-----------------|--------------------------------------------------------------------|--------------------------------------------------------------------------------------------------------------------------------------------|---------------------------------------------------------------------------------------------------------------------------------------------------------------------------------------------------------------------|-------------------|-----------------------------------------------------------------------------------------|-----------------------------------------------------------------------------------------------------------|--------------------------------------------------------------------------------------------------------------------------------------------------------------------------------------------------------------------------------------------------------------------------------------------------------------------------------------------------------------------------------------------------------------------------------------------------------------------------------------------------------------------------------------------------------------------------------------------------------------------------------------------------------------------------------------------------|-----------------|-----------------|-----------------|-----------------|-----------------|-----------------|--------------------------------------------------------------------------------------------------------------------------------------------------------------------------------------------------------------------------------------------------------------------------------------------------------------------------------------------------------------------------------------------------------------------------------------------------------------------------------------------------------------------------------------------------------------------------------------------------|-----------------|-----------------|-----------------|-----------------|-----------------|-----------------|-----------------|-----------------|
| EPI_ISL_9660035 | CH BLAYE                                                           | CHU BORDEAUX                                                                                                                               | Agnès George-Walryck; Laurent Bussou; Marie-Edith Lafon; Pantxika Bellecave; Valentine Lesourd-Aubert                                                                                                               |                   |                                                                                         |                                                                                                           |                                                                                                                                                                                                                                                                                                                                                                                                                                                                                                                                                                                                                                                                                                  |                 |                 |                 |                 |                 |                 |                                                                                                                                                                                                                                                                                                                                                                                                                                                                                                                                                                                                  |                 |                 |                 |                 |                 |                 |                 |                 |
| EPI_ISL_9627368 | CH LANDERNEAU                                                      | laboratoire de Virologie CHRU Brest                                                                                                        | Adissa Tran Minoui; Christopher Payan; Léa Pilorgé; Pauline Bargain; Simon Rambaud; Sophie Vailet                                                                                                                   |                   |                                                                                         |                                                                                                           |                                                                                                                                                                                                                                                                                                                                                                                                                                                                                                                                                                                                                                                                                                  |                 |                 |                 |                 |                 |                 |                                                                                                                                                                                                                                                                                                                                                                                                                                                                                                                                                                                                  |                 |                 |                 |                 |                 |                 |                 |                 |
| EPI_ISL_9796399 | CH MONT DE MARSAN (LAYNE)                                          | CNR Virus des Infections Respiratoires - France SUD                                                                                        | Antonin Bal; Bruno Lina; Bruno Simon; Gregory Destras; Gwendolyne Burfin; Hadrien Regue; Laurence Josset; Martine Valette; Quentin Semanas; Theophile Boyer                                                         |                   |                                                                                         |                                                                                                           |                                                                                                                                                                                                                                                                                                                                                                                                                                                                                                                                                                                                                                                                                                  |                 |                 |                 |                 |                 |                 |                                                                                                                                                                                                                                                                                                                                                                                                                                                                                                                                                                                                  |                 |                 |                 |                 |                 |                 |                 |                 |
| EPI_ISL_9606352 | CH Porto - H Sto Antonio                                           | Instituto Nacional de Saude (INSA)                                                                                                         | Borges et al                                                                                                                                                                                                        |                   |                                                                                         |                                                                                                           |                                                                                                                                                                                                                                                                                                                                                                                                                                                                                                                                                                                                                                                                                                  |                 |                 |                 |                 |                 |                 |                                                                                                                                                                                                                                                                                                                                                                                                                                                                                                                                                                                                  |                 |                 |                 |                 |                 |                 |                 |                 |
| EPI_ISL_9606353 | CH Setubal                                                         | Instituto Nacional de Saude (INSA)                                                                                                         | Borges et al                                                                                                                                                                                                        |                   |                                                                                         |                                                                                                           |                                                                                                                                                                                                                                                                                                                                                                                                                                                                                                                                                                                                                                                                                                  |                 |                 |                 |                 |                 |                 |                                                                                                                                                                                                                                                                                                                                                                                                                                                                                                                                                                                                  |                 |                 |                 |                 |                 |                 |                 |                 |
| EPI_ISL_9668884 | CH.INTERCOMMUNAL DE CRETEIL                                        | Department of Virology, Henri Mondor University Hospital, Assistance Publique Hôpitaux de Paris, Université Paris-Est Créteil, INSERM U955 | Alexandre Soulier; Christophe Rodriguez; Elisabeth Trawinski; Guillaume Gricourt; Jean-Michel Pawlotsky; Melissa N'Debi; Slim Fourati; Vanessa Demontant                                                            |                   |                                                                                         |                                                                                                           |                                                                                                                                                                                                                                                                                                                                                                                                                                                                                                                                                                                                                                                                                                  |                 |                 |                 |                 |                 |                 |                                                                                                                                                                                                                                                                                                                                                                                                                                                                                                                                                                                                  |                 |                 |                 |                 |                 |                 |                 |                 |
| EPI_ISL_9606345 | CHTMAD                                                             | Instituto Nacional de Saude (INSA)                                                                                                         | Borges et al                                                                                                                                                                                                        |                   |                                                                                         |                                                                                                           |                                                                                                                                                                                                                                                                                                                                                                                                                                                                                                                                                                                                                                                                                                  |                 |                 |                 |                 |                 |                 |                                                                                                                                                                                                                                                                                                                                                                                                                                                                                                                                                                                                  |                 |                 |                 |                 |                 |                 |                 |                 |
| EPI_ISL_9607190 | CHU - Saint-Denis                                                  | Laboratoire de virologie, CNR arbovirus Associé, Chu de la Réunion                                                                         | Anne-Julie Gourded; Etienne Frumence; Marie-Christine Jaffar Bandjee; Nicolas M'nehmensy; Nicolas Traversier; Rubens Lhonnour                                                                                       |                   |                                                                                         |                                                                                                           |                                                                                                                                                                                                                                                                                                                                                                                                                                                                                                                                                                                                                                                                                                  |                 |                 |                 |                 |                 |                 |                                                                                                                                                                                                                                                                                                                                                                                                                                                                                                                                                                                                  |                 |                 |                 |                 |                 |                 |                 |                 |
| EPI_ISL_9442270 | CHU BORDEAUX                                                       | CHU BORDEAUX                                                                                                                               | Agnès George-Walryck; Laurent Bussou; Marie-Edith Lafon; Pantxika Bellecave; Valentine Lesourd-Aubert                                                                                                               |                   |                                                                                         |                                                                                                           |                                                                                                                                                                                                                                                                                                                                                                                                                                                                                                                                                                                                                                                                                                  |                 |                 |                 |                 |                 |                 |                                                                                                                                                                                                                                                                                                                                                                                                                                                                                                                                                                                                  |                 |                 |                 |                 |                 |                 |                 |                 |
| EPI_ISL_9442315 |                                                                    |                                                                                                                                            |                                                                                                                                                                                                                     |                   |                                                                                         |                                                                                                           |                                                                                                                                                                                                                                                                                                                                                                                                                                                                                                                                                                                                                                                                                                  |                 |                 |                 |                 |                 |                 |                                                                                                                                                                                                                                                                                                                                                                                                                                                                                                                                                                                                  |                 |                 |                 |                 |                 |                 |                 |                 |
| EPI_ISL_9442760 |                                                                    |                                                                                                                                            |                                                                                                                                                                                                                     |                   |                                                                                         |                                                                                                           |                                                                                                                                                                                                                                                                                                                                                                                                                                                                                                                                                                                                                                                                                                  |                 |                 |                 |                 |                 |                 |                                                                                                                                                                                                                                                                                                                                                                                                                                                                                                                                                                                                  |                 |                 |                 |                 |                 |                 |                 |                 |
| EPI_ISL_9514529 | CHU BREST                                                          | laboratoire de Virologie CHRU Brest                                                                                                        | Adissa Tran Minoui; Christopher Payan; Léa Pilorgé; Pauline Bargain; Simon Rambaud; Sophie Vailet                                                                                                                   |                   |                                                                                         |                                                                                                           |                                                                                                                                                                                                                                                                                                                                                                                                                                                                                                                                                                                                                                                                                                  |                 |                 |                 |                 |                 |                 |                                                                                                                                                                                                                                                                                                                                                                                                                                                                                                                                                                                                  |                 |                 |                 |                 |                 |                 |                 |                 |
| EPI_ISL_9458365 | CHU Pontchailou                                                    | CHU Pontchailou                                                                                                                            | DE TAYRAC Marie; DENOVAL Florent; ETCHEVERRY Amandine; FEBREAU Christine; GALIBERT Marie Dominique; GROLIHER Claire; JAGLINE Steven; PRONIER Charlotte; QUENET Benjamin; SASSI Mohamed; THIBAUT Vincent             |                   |                                                                                         |                                                                                                           |                                                                                                                                                                                                                                                                                                                                                                                                                                                                                                                                                                                                                                                                                                  |                 |                 |                 |                 |                 |                 |                                                                                                                                                                                                                                                                                                                                                                                                                                                                                                                                                                                                  |                 |                 |                 |                 |                 |                 |                 |                 |
| EPI_ISL_9458368 |                                                                    |                                                                                                                                            |                                                                                                                                                                                                                     |                   |                                                                                         |                                                                                                           |                                                                                                                                                                                                                                                                                                                                                                                                                                                                                                                                                                                                                                                                                                  |                 |                 |                 |                 |                 |                 |                                                                                                                                                                                                                                                                                                                                                                                                                                                                                                                                                                                                  |                 |                 |                 |                 |                 |                 |                 |                 |
| EPI_ISL_9797978 | CHU TOULOUSE                                                       | CNR Virus des Infections Respiratoires - France SUD                                                                                        | Antonin Bal; Bruno Lina; Bruno Simon; Gregory Destras; Gwendolyne Burfin; Hadrien Regue; Laurence Josset; Martine Valette; Quentin Semanas; Theophile Boyer                                                         |                   |                                                                                         |                                                                                                           |                                                                                                                                                                                                                                                                                                                                                                                                                                                                                                                                                                                                                                                                                                  |                 |                 |                 |                 |                 |                 |                                                                                                                                                                                                                                                                                                                                                                                                                                                                                                                                                                                                  |                 |                 |                 |                 |                 |                 |                 |                 |
| EPI_ISL_9798037 |                                                                    |                                                                                                                                            |                                                                                                                                                                                                                     |                   |                                                                                         |                                                                                                           |                                                                                                                                                                                                                                                                                                                                                                                                                                                                                                                                                                                                                                                                                                  |                 |                 |                 |                 |                 |                 |                                                                                                                                                                                                                                                                                                                                                                                                                                                                                                                                                                                                  |                 |                 |                 |                 |                 |                 |                 |                 |
| EPI_ISL_9613452 | CHU UCL Namur, Avenue G. Thérasse 1, 5530 Yvoir, Belgium           | Plateforme de testing Namuroise                                                                                                            | Degosserie Jonathan; Demars Aurore; Denis Olivier; Maschietto Céline; Mullier Francois; Nobis Chloé; Nyinkeu Kemamen Lesly; Otto Gaetan; ravez Amédée                                                               |                   |                                                                                         |                                                                                                           |                                                                                                                                                                                                                                                                                                                                                                                                                                                                                                                                                                                                                                                                                                  |                 |                 |                 |                 |                 |                 |                                                                                                                                                                                                                                                                                                                                                                                                                                                                                                                                                                                                  |                 |                 |                 |                 |                 |                 |                 |                 |
| EPI_ISL_9613453 |                                                                    |                                                                                                                                            |                                                                                                                                                                                                                     |                   |                                                                                         |                                                                                                           |                                                                                                                                                                                                                                                                                                                                                                                                                                                                                                                                                                                                                                                                                                  |                 |                 |                 |                 |                 |                 |                                                                                                                                                                                                                                                                                                                                                                                                                                                                                                                                                                                                  |                 |                 |                 |                 |                 |                 |                 |                 |
| EPI_ISL_9424963 | CHUGA-IBP-Laboratoire de VirologieX                                | IBP-laboratoire de virologie                                                                                                               | Alban Caporossi; Anne Signori -Schmuck; Anne-Karen Faure; Aurélie Truffot; Benjamin Nemoz; Hugo Jardin; Julien Andréani; Julien Lupo; Léa Ponderand; Pascal Poingnard; Patrice Morand; Raphaële Germi; Sylvie Larat |                   |                                                                                         |                                                                                                           |                                                                                                                                                                                                                                                                                                                                                                                                                                                                                                                                                                                                                                                                                                  |                 |                 |                 |                 |                 |                 |                                                                                                                                                                                                                                                                                                                                                                                                                                                                                                                                                                                                  |                 |                 |                 |                 |                 |                 |                 |                 |
| EPI_ISL_9424984 |                                                                    |                                                                                                                                            |                                                                                                                                                                                                                     |                   |                                                                                         |                                                                                                           |                                                                                                                                                                                                                                                                                                                                                                                                                                                                                                                                                                                                                                                                                                  |                 |                 |                 |                 |                 |                 |                                                                                                                                                                                                                                                                                                                                                                                                                                                                                                                                                                                                  |                 |                 |                 |                 |                 |                 |                 |                 |
| EPI_ISL_9644692 | CHUV                                                               | Laboratory of genomics and metagenomics, Institute of Microbiology, University Hospital Centre and University of Lausanne                  | Claire Bertelli; Damien Jacot; Gilbert Greub; Sébastien Aebly; Trestan Pilonel                                                                                                                                      |                   |                                                                                         |                                                                                                           |                                                                                                                                                                                                                                                                                                                                                                                                                                                                                                                                                                                                                                                                                                  |                 |                 |                 |                 |                 |                 |                                                                                                                                                                                                                                                                                                                                                                                                                                                                                                                                                                                                  |                 |                 |                 |                 |                 |                 |                 |                 |
| EPI_ISL_9601043 | CNR Virus des Infections Respiratoires - France SUD                | CNR Virus des Infections Respiratoires - France SUD                                                                                        | Antonin Bal; Bruno Lina; Bruno Simon; Gregory Destras; Gwendolyne Burfin; Hadrien Regue; Laurence Josset; Martine Valette; Quentin Semanas; Theophile Boyer                                                         |                   |                                                                                         |                                                                                                           |                                                                                                                                                                                                                                                                                                                                                                                                                                                                                                                                                                                                                                                                                                  |                 |                 |                 |                 |                 |                 |                                                                                                                                                                                                                                                                                                                                                                                                                                                                                                                                                                                                  |                 |                 |                 |                 |                 |                 |                 |                 |
| EPI_ISL_9602050 |                                                                    |                                                                                                                                            |                                                                                                                                                                                                                     |                   |                                                                                         |                                                                                                           |                                                                                                                                                                                                                                                                                                                                                                                                                                                                                                                                                                                                                                                                                                  |                 |                 |                 |                 |                 |                 |                                                                                                                                                                                                                                                                                                                                                                                                                                                                                                                                                                                                  |                 |                 |                 |                 |                 |                 |                 |                 |
| EPI_ISL_9795721 |                                                                    |                                                                                                                                            |                                                                                                                                                                                                                     |                   |                                                                                         |                                                                                                           |                                                                                                                                                                                                                                                                                                                                                                                                                                                                                                                                                                                                                                                                                                  |                 |                 |                 |                 |                 |                 |                                                                                                                                                                                                                                                                                                                                                                                                                                                                                                                                                                                                  |                 |                 |                 |                 |                 |                 |                 |                 |
| EPI_ISL_9799066 |                                                                    |                                                                                                                                            |                                                                                                                                                                                                                     |                   |                                                                                         |                                                                                                           |                                                                                                                                                                                                                                                                                                                                                                                                                                                                                                                                                                                                                                                                                                  |                 |                 |                 |                 |                 |                 |                                                                                                                                                                                                                                                                                                                                                                                                                                                                                                                                                                                                  |                 |                 |                 |                 |                 |                 |                 |                 |
| EPI_ISL_9367776 | COTUGNO                                                            | Ospedale Cotugno, AO Dei Colli                                                                                                             | Claudia Tiberio                                                                                                                                                                                                     |                   |                                                                                         |                                                                                                           |                                                                                                                                                                                                                                                                                                                                                                                                                                                                                                                                                                                                                                                                                                  |                 |                 |                 |                 |                 |                 |                                                                                                                                                                                                                                                                                                                                                                                                                                                                                                                                                                                                  |                 |                 |                 |                 |                 |                 |                 |                 |
| EPI_ISL_9336245 | EPI_ISL_9336246                                                    | EPI_ISL_9336250                                                                                                                            | EPI_ISL_9336252                                                                                                                                                                                                     | EPI_ISL_9336253   | EPI_ISL_9336257                                                                         | EPI_ISL_9336262                                                                                           | EPI_ISL_9336263                                                                                                                                                                                                                                                                                                                                                                                                                                                                                                                                                                                                                                                                                  | EPI_ISL_9336265 | EPI_ISL_9336267 | EPI_ISL_9336269 | EPI_ISL_9336271 | EPI_ISL_9336272 | EPI_ISL_9336276 | EPI_ISL_9336278                                                                                                                                                                                                                                                                                                                                                                                                                                                                                                                                                                                  | EPI_ISL_9336279 | EPI_ISL_9336280 |                 |                 |                 |                 |                 |                 |
| EPI_ISL_9336281 | EPI_ISL_9336283                                                    | EPI_ISL_9336285                                                                                                                            | EPI_ISL_9336286                                                                                                                                                                                                     | EPI_ISL_9336287   | EPI_ISL_9336288                                                                         | EPI_ISL_9336290                                                                                           | EPI_ISL_9336294                                                                                                                                                                                                                                                                                                                                                                                                                                                                                                                                                                                                                                                                                  | EPI_ISL_9336295 | EPI_ISL_9336296 | EPI_ISL_9336297 | EPI_ISL_9336299 | EPI_ISL_9336300 | EPI_ISL_9336301 | EPI_ISL_9336302                                                                                                                                                                                                                                                                                                                                                                                                                                                                                                                                                                                  | EPI_ISL_9336303 | EPI_ISL_9336304 | EPI_ISL_9336305 | EPI_ISL_9336306 | EPI_ISL_9336309 |                 |                 |                 |
| EPI_ISL_9336313 | EPI_ISL_9336314                                                    | EPI_ISL_9336316                                                                                                                            | EPI_ISL_9336318                                                                                                                                                                                                     | EPI_ISL_9336319   | EPI_ISL_9336323                                                                         | EPI_ISL_9336324                                                                                           | EPI_ISL_9336325                                                                                                                                                                                                                                                                                                                                                                                                                                                                                                                                                                                                                                                                                  | EPI_ISL_9336326 | EPI_ISL_9336328 | EPI_ISL_9336329 | EPI_ISL_9336331 | EPI_ISL_9336332 | EPI_ISL_9336333 | EPI_ISL_9336334                                                                                                                                                                                                                                                                                                                                                                                                                                                                                                                                                                                  | EPI_ISL_9336335 | EPI_ISL_9336337 |                 |                 |                 |                 |                 |                 |
| see above       | CSIR-NEERI, Nagpur Covid-19 Testing Lab                            |                                                                                                                                            | CSIR-NEERI, Nagpur Covid-19 Testing Lab                                                                                                                                                                             |                   | Krishna Khairnar et al.                                                                 |                                                                                                           |                                                                                                                                                                                                                                                                                                                                                                                                                                                                                                                                                                                                                                                                                                  |                 |                 |                 |                 |                 |                 |                                                                                                                                                                                                                                                                                                                                                                                                                                                                                                                                                                                                  |                 |                 |                 |                 |                 |                 |                 |                 |
| EPI_ISL_9210222 | Canterbury Health Laboratories                                     |                                                                                                                                            | Institute of Environmental Science and Research (ESR)                                                                                                                                                               |                   |                                                                                         |                                                                                                           |                                                                                                                                                                                                                                                                                                                                                                                                                                                                                                                                                                                                                                                                                                  |                 |                 |                 |                 |                 |                 |                                                                                                                                                                                                                                                                                                                                                                                                                                                                                                                                                                                                  |                 |                 |                 |                 |                 |                 |                 |                 |
| EPI_ISL_9441134 | Center for Laboratory Medicine                                     |                                                                                                                                            | Center for Laboratory Medicine, ZLMSG                                                                                                                                                                               |                   |                                                                                         |                                                                                                           |                                                                                                                                                                                                                                                                                                                                                                                                                                                                                                                                                                                                                                                                                                  |                 |                 |                 |                 |                 |                 |                                                                                                                                                                                                                                                                                                                                                                                                                                                                                                                                                                                                  |                 |                 |                 |                 |                 |                 |                 |                 |
| EPI_ISL_9791320 | Centre Hospitalier Eure Seine                                      |                                                                                                                                            | Centre Hospitalier Universitaire de Rouen Laboratoire de Virologie                                                                                                                                                  |                   |                                                                                         |                                                                                                           |                                                                                                                                                                                                                                                                                                                                                                                                                                                                                                                                                                                                                                                                                                  |                 |                 |                 |                 |                 |                 |                                                                                                                                                                                                                                                                                                                                                                                                                                                                                                                                                                                                  |                 |                 |                 |                 |                 |                 |                 |                 |
| EPI_ISL_9791417 |                                                                    |                                                                                                                                            | Yannick Gerth                                                                                                                                                                                                       |                   |                                                                                         |                                                                                                           |                                                                                                                                                                                                                                                                                                                                                                                                                                                                                                                                                                                                                                                                                                  |                 |                 |                 |                 |                 |                 |                                                                                                                                                                                                                                                                                                                                                                                                                                                                                                                                                                                                  |                 |                 |                 |                 |                 |                 |                 |                 |
| EPI_ISL_9612212 | EPI_ISL_9612214                                                    | EPI_ISL_9612215                                                                                                                            | EPI_ISL_9612217                                                                                                                                                                                                     | EPI_ISL_9612218   | EPI_ISL_9612219                                                                         | EPI_ISL_9612220                                                                                           | Anja Werno; Antje van der Linden; Arlo Upton; Chris Mansell; Clare Gebbie; David Hammer; Dhanisha Patel; Dragana Drinkovic; Erasmus Smit; Gary McAuliffe; Hana Sofia Anderson; Hermes Perez; James Usher; Jim Sherwood; Jung Wang; Joep de Ligt; Josh Freeman; Julia Howard; Julie Elvy; Lauren Jolly; Mary DeAlmeida; Matt Blakiston; Matt Storey; Matthew Rogers; Max Bloomfield; Michael Addie; Michelle Balm; Muhammad Faisal; Nikki Freed; Olin Silander; Olivia Stoenen; Rachel Boyle; Sally Roberts; SallyAnn Harbison; Sarah Cockerton; Sarah Jefferies; Sharmin Muttalibay; Susan Morpeth; Susan Taylor; Timothy Blackmore; Vani Sathyanand; Veronica Payet; Virginia Hope; Xiaoyun Ren |                 |                 |                 |                 |                 |                 |                                                                                                                                                                                                                                                                                                                                                                                                                                                                                                                                                                                                  |                 |                 |                 |                 |                 |                 |                 |                 |
| see above       | Centre Hospitalier Universitaire Clermont-Ferrand                  |                                                                                                                                            | CHU Clermont-Ferrand, service de virologie                                                                                                                                                                          |                   |                                                                                         |                                                                                                           |                                                                                                                                                                                                                                                                                                                                                                                                                                                                                                                                                                                                                                                                                                  |                 |                 |                 |                 |                 |                 |                                                                                                                                                                                                                                                                                                                                                                                                                                                                                                                                                                                                  |                 |                 |                 |                 |                 |                 |                 |                 |
| EPI_ISL_9791292 | Centre Hospitalier Universitaire de Rouen Laboratoire de Virologie |                                                                                                                                            | Centre Hospitalier Universitaire de Rouen Laboratoire de Virologie                                                                                                                                                  |                   |                                                                                         |                                                                                                           |                                                                                                                                                                                                                                                                                                                                                                                                                                                                                                                                                                                                                                                                                                  |                 |                 |                 |                 |                 |                 |                                                                                                                                                                                                                                                                                                                                                                                                                                                                                                                                                                                                  |                 |                 |                 |                 |                 |                 |                 |                 |
| EPI_ISL_9600562 | EPI_ISL_9600574                                                    | EPI_ISL_9600575                                                                                                                            | Centrum Medyczne Diagnostyki Laboratoryjnej i Badan Przesiewowych Instytut Centrum Zdrowia Matki Polki                                                                                                              |                   |                                                                                         | Wojewodzka Stacja Sanitarno-Epidemiologiczna w Lodzi, Oddzial Laboratoryjny Mikrobiologii i Parazytologii | Agnieszka Karnowska; Aleksandra Krawczyk; Danuta Bartczak; Elian Terpo; Katarzyna Kosowska; Lucyna Kochanowska; Marta Gawronska; Martyna Matera; Szymon Konkolewski                                                                                                                                                                                                                                                                                                                                                                                                                                                                                                                              |                 |                 |                 |                 |                 |                 |                                                                                                                                                                                                                                                                                                                                                                                                                                                                                                                                                                                                  |                 |                 |                 |                 |                 |                 |                 |                 |
| EPI_ISL_9695980 | Centrum voor Medische Analyse                                      |                                                                                                                                            | Labo Klinische Biologie, UZA                                                                                                                                                                                        |                   |                                                                                         |                                                                                                           |                                                                                                                                                                                                                                                                                                                                                                                                                                                                                                                                                                                                                                                                                                  |                 |                 |                 |                 |                 |                 |                                                                                                                                                                                                                                                                                                                                                                                                                                                                                                                                                                                                  |                 |                 |                 |                 |                 |                 |                 |                 |
| EPI_ISL_9729377 | Clemenshospital - Alexianer Clemenshospital Münster                |                                                                                                                                            | Robert Koch Institute                                                                                                                                                                                               |                   |                                                                                         |                                                                                                           |                                                                                                                                                                                                                                                                                                                                                                                                                                                                                                                                                                                                                                                                                                  |                 |                 |                 |                 |                 |                 |                                                                                                                                                                                                                                                                                                                                                                                                                                                                                                                                                                                                  |                 |                 |                 |                 |                 |                 |                 |                 |
| EPI_ISL_9729722 |                                                                    |                                                                                                                                            | Basil Britto Xavier; Christine Lammens; Herman Goossens; Ines Verbesselt; Jasmine Coppens; Kathleen Holemans; Marie Le Mercier; Veerle Matheusens                                                                   |                   |                                                                                         |                                                                                                           |                                                                                                                                                                                                                                                                                                                                                                                                                                                                                                                                                                                                                                                                                                  |                 |                 |                 |                 |                 |                 |                                                                                                                                                                                                                                                                                                                                                                                                                                                                                                                                                                                                  |                 |                 |                 |                 |                 |                 |                 |                 |
| EPI_ISL_9286027 | EPI_ISL_9286030                                                    | EPI_ISL_9286040                                                                                                                            | EPI_ISL_9286045                                                                                                                                                                                                     | EPI_ISL_9286052   | EPI_ISL_9286057                                                                         | EPI_ISL_9286076                                                                                           | EPI_ISL_9286080                                                                                                                                                                                                                                                                                                                                                                                                                                                                                                                                                                                                                                                                                  | EPI_ISL_9286084 | EPI_ISL_9286086 | EPI_ISL_9286101 | EPI_ISL_9286102 | EPI_ISL_9286107 | EPI_ISL_9286108 | EPI_ISL_9314305                                                                                                                                                                                                                                                                                                                                                                                                                                                                                                                                                                                  | EPI_ISL_9314372 | EPI_ISL_9314404 | EPI_ISL_9314446 | EPI_ISL_9314497 | EPI_ISL_9314546 | EPI_ISL_9379085 | EPI_ISL_9379086 |                 |
| EPI_ISL_9379087 | EPI_ISL_9379088                                                    | EPI_ISL_9379090                                                                                                                            | EPI_ISL_9379091                                                                                                                                                                                                     | EPI_ISL_9379112   | EPI_ISL_9379114                                                                         | EPI_ISL_9379129                                                                                           | EPI_ISL_9379219                                                                                                                                                                                                                                                                                                                                                                                                                                                                                                                                                                                                                                                                                  | EPI_ISL_9379231 | EPI_ISL_9379273 | EPI_ISL_9379310 | EPI_ISL_9379325 | EPI_ISL_9379335 | EPI_ISL_9379381 | EPI_ISL_9488882                                                                                                                                                                                                                                                                                                                                                                                                                                                                                                                                                                                  | EPI_ISL_9488892 | EPI_ISL_9488913 | EPI_ISL_9488986 | EPI_ISL_9488955 | EPI_ISL_9488956 | EPI_ISL_9488967 | EPI_ISL_9488976 | EPI_ISL_9488977 |
| EPI_ISL_9488977 | EPI_ISL_9488977                                                    | EPI_ISL_9488981                                                                                                                            | EPI_ISL_9488987                                                                                                                                                                                                     | EPI_ISL_9488994   | EPI_ISL_9489002                                                                         | EPI_ISL_9489026                                                                                           | EPI_ISL_9489037                                                                                                                                                                                                                                                                                                                                                                                                                                                                                                                                                                                                                                                                                  | EPI_ISL_9489046 | EPI_ISL_9489054 | EPI_ISL_9489053 | EPI_ISL_9489057 | EPI_ISL_9489072 | EPI_ISL_9489074 | EPI_ISL_9489086                                                                                                                                                                                                                                                                                                                                                                                                                                                                                                                                                                                  | EPI_ISL_9489088 | EPI_ISL_9489094 | EPI_ISL_9489090 | EPI_ISL_9489093 | EPI_ISL_9489100 | EPI_ISL_9489109 | EPI_ISL_9489140 | EPI_ISL_9489146 |
| EPI_ISL_9489154 | EPI_ISL_9489158                                                    | EPI_ISL_9489161                                                                                                                            | EPI_ISL_9489164                                                                                                                                                                                                     | EPI_ISL_9489174   | EPI_ISL_9500790                                                                         | EPI_ISL_9500792                                                                                           | EPI_ISL_9500811                                                                                                                                                                                                                                                                                                                                                                                                                                                                                                                                                                                                                                                                                  | EPI_ISL_9500820 | EPI_ISL_9500825 | EPI_ISL_9500841 | EPI_ISL_9500854 | EPI_ISL_9500860 | EPI_ISL_9500877 | EPI_ISL_9500882                                                                                                                                                                                                                                                                                                                                                                                                                                                                                                                                                                                  | EPI_ISL_9500904 | EPI_ISL_9500926 | EPI_ISL_9500936 | EPI_ISL_9500937 | EPI_ISL_9500971 | EPI_ISL_9500977 | EPI_ISL_9500978 | EPI_ISL_9501009 |
| EPI_ISL_9501009 | EPI_ISL_9501012                                                    | EPI_ISL_9501016                                                                                                                            | EPI_ISL_9501081                                                                                                                                                                                                     | EPI_ISL_9674095   | Alon Ziv; Amos Adler; Goel Morad; Katya Levytskyj; Lior Handler; Ora Halutz; Orly Eshel |                                                                                                           |                                                                                                                                                                                                                                                                                                                                                                                                                                                                                                                                                                                                                                                                                                  |                 |                 |                 |                 |                 |                 |                                                                                                                                                                                                                                                                                                                                                                                                                                                                                                                                                                                                  |                 |                 |                 |                 |                 |                 |                 |                 |
| see above       | Clinical Microbiology Laboratory, Tel Aviv Sourasky Medical Center |                                                                                                                                            | Clinical Microbiology Laboratory, Tel Aviv Sourasky Medical Center                                                                                                                                                  |                   |                                                                                         |                                                                                                           |                                                                                                                                                                                                                                                                                                                                                                                                                                                                                                                                                                                                                                                                                                  |                 |                 |                 |                 |                 |                 |                                                                                                                                                                                                                                                                                                                                                                                                                                                                                                                                                                                                  |                 |                 |                 |                 |                 |                 |                 |                 |
| EPI_ISL_9596766 | EPI_ISL_9596768                                                    | EPI_ISL_9596770                                                                                                                            | EPI_ISL_9596771                                                                                                                                                                                                     | EPI_ISL_9596772   | EPI_ISL_9596773                                                                         | EPI_ISL_9596775                                                                                           | EPI_ISL_9596776                                                                                                                                                                                                                                                                                                                                                                                                                                                                                                                                                                                                                                                                                  | EPI_ISL_9596777 | EPI_ISL_9596779 | EPI_ISL_9596781 | EPI_ISL_9596783 | EPI_ISL_9596784 | EPI_ISL_9596786 | EPI_ISL_9596787                                                                                                                                                                                                                                                                                                                                                                                                                                                                                                                                                                                  | EPI_ISL_9596788 | EPI_ISL_9596791 | EPI_ISL_9596792 | EPI_ISL_9596793 | EPI_ISL_9596794 | EPI_ISL_9596795 | EPI_ISL_9596797 |                 |
| EPI_ISL_9596798 | EPI_ISL_9596799                                                    | EPI_ISL_9596800                                                                                                                            | EPI_ISL_9596848                                                                                                                                                                                                     | EPI_ISL_9596849   | EPI_ISL_9596850                                                                         | EPI_ISL_9596851                                                                                           | EPI_ISL_9596852                                                                                                                                                                                                                                                                                                                                                                                                                                                                                                                                                                                                                                                                                  | EPI_ISL_9596853 | EPI_ISL_9596855 | EPI_ISL_9596856 | EPI_ISL_9596857 | EPI_ISL_9596858 | EPI_ISL_9596859 | EPI_ISL_9596860                                                                                                                                                                                                                                                                                                                                                                                                                                                                                                                                                                                  | EPI_ISL_9596861 | EPI_ISL_9596862 | EPI_ISL_9596863 | EPI_ISL_9596864 | EPI_ISL_9596865 | EPI_ISL_9596866 | EPI_ISL_9596867 |                 |
| EPI_ISL_9596972 | EPI_ISL_9596973                                                    | EPI_ISL_9596974                                                                                                                            | EPI_ISL_9596975                                                                                                                                                                                                     | EPI_ISL_9596976   | EPI_ISL_9596977                                                                         | EPI_ISL_9596978                                                                                           | EPI_ISL_9596979                                                                                                                                                                                                                                                                                                                                                                                                                                                                                                                                                                                                                                                                                  | EPI_ISL_9596980 | EPI_ISL_9596981 | EPI_ISL_9596982 | EPI_ISL_9596983 | EPI_ISL_9596984 | EPI_ISL_9596985 | EPI_ISL_9596986                                                                                                                                                                                                                                                                                                                                                                                                                                                                                                                                                                                  | EPI_ISL_9596987 | EPI_ISL_9596988 | EPI_ISL_9596989 | EPI_ISL_9596990 | EPI_ISL_9596991 | EPI_ISL_9596992 | EPI_ISL_9596993 |                 |
| EPI_ISL_9597003 | EPI_ISL_9597004                                                    | EPI_ISL_9597005                                                                                                                            | EPI_ISL_9597006                                                                                                                                                                                                     | EPI_ISL_9597007   | EPI_ISL_9597008                                                                         | EPI_ISL_9597009                                                                                           | EPI_ISL_9597011                                                                                                                                                                                                                                                                                                                                                                                                                                                                                                                                                                                                                                                                                  | EPI_ISL_9597012 | EPI_ISL_9597013 | EPI_ISL_9597015 | EPI_ISL_9597016 | EPI_ISL_9597017 | EPI_ISL_9597018 | EPI_ISL_9597019                                                                                                                                                                                                                                                                                                                                                                                                                                                                                                                                                                                  | EPI_ISL_9597020 | EPI_ISL_9597021 | EPI_ISL_9597023 | EPI_ISL_9597025 | EPI_ISL_9597026 | EPI_ISL_9597029 | EPI_ISL_9597030 |                 |
| EPI_ISL_9597033 | EPI_ISL_9597035                                                    | EPI_ISL_9597036                                                                                                                            | EPI_ISL_9597040                                                                                                                                                                                                     | EPI_ISL_9597154   | see above                                                                               |                                                                                                           |                                                                                                                                                                                                                                                                                                                                                                                                                                                                                                                                                                                                                                                                                                  |                 |                 |                 |                 |                 |                 |                                                                                                                                                                                                                                                                                                                                                                                                                                                                                                                                                                                                  |                 |                 |                 |                 |                 |                 |                 |                 |
| see above       | Clinical Microbiology, Infection Prevention and Control            |                                                                                                                                            | Section for Molecular Diagnostics                                                                                                                                                                                   |                   |                                                                                         |                                                                                                           |                                                                                                                                                                                                                                                                                                                                                                                                                                                                                                                                                                                                                                                                                                  |                 |                 |                 |                 |                 |                 |                                                                                                                                                                                                                                                                                                                                                                                                                                                                                                                                                                                                  |                 |                 |                 |                 |                 |                 |                 |                 |
| EPI_ISL_9750415 | Clinical Molecular Microbiology Laboratory, UNC Hospitals          |                                                                                                                                            | Jeremy Wang                                                                                                                                                                                                         |                   |                                                                                         |                                                                                                           |                                                                                                                                                                                                                                                                                                                                                                                                                                                                                                                                                                                                                                                                                                  |                 |                 |                 |                 |                 |                 |                                                                                                                                                                                                                                                                                                                                                                                                                                                                                                                                                                                                  |                 |                 |                 |                 |                 |                 |                 |                 |
| EPI_ISL_9750417 |                                                                    |                                                                                                                                            | Bravada Hill; Corbin Jones; Jeremy Wang; Katie Martin; Melissa Miller; Sayal Giraless-Medrano; Tara Skelly                                                                                                          |                   |                                                                                         |                                                                                                           |                                                                                                                                                                                                                                                                                                                                                                                                                                                                                                                                                                                                                                                                                                  |                 |                 |                 |                 |                 |                 |                                                                                                                                                                                                                                                                                                                                                                                                                                                                                                                                                                                                  |                 |                 |                 |                 |                 |                 |                 |                 |
| EPI_ISL_9750439 |                                                                    |                                                                                                                                            | Björn Hallström; Janis Björkman                                                                                                                                                                                     |                   |                                                                                         |                                                                                                           |                                                                                                                                                                                                                                                                                                                                                                                                                                                                                                                                                                                                                                                                                                  |                 |                 |                 |                 |                 |                 |                                                                                                                                                                                                                                                                                                                                                                                                                                                                                                                                                                                                  |                 |                 |                 |                 |                 |                 |                 |                 |
| EPI_ISL_9452745 | Clinical Virology                                                  |                                                                                                                                            | Clinical Bacteriology, University Hospital Basel                                                                                                                                                                    |                   |                                                                                         |                                                                                                           |                                                                                                                                                                                                                                                                                                                                                                                                                                                                                                                                                                                                                                                                                                  |                 |                 |                 |                 |                 |                 |                                                                                                                                                                                                                                                                                                                                                                                                                                                                                                                                                                                                  |                 |                 |                 |                 |                 |                 |                 |                 |
| EPI_ISL_9516642 |                                                                    |                                                                                                                                            | Adrian Egli; Alfredo Mari; Fanny Wegner; Hans Hirsch; Helena MB Seth-Smith; Julia Bielicki; Karoline Leuzinger; Manuel Battagay; Tim Roloff                                                                         |                   |                                                                                         |                                                                                                           |                                                                                                                                                                                                                                                                                                                                                                                                                                                                                                                                                                                                                                                                                                  |                 |                 |                 |                 |                 |                 |                                                                                                                                                                                                                                                                                                                                                                                                                                                                                                                                                                                                  |                 |                 |                 |                 |                 |                 |                 |                 |
| EPI_ISL_9549264 | DOHMH Jamaica                                                      |                                                                                                                                            | New York City Public Health Laboratory                                                                                                                                                                              |                   |                                                                                         |                                                                                                           |                                                                                                                                                                                                                                                                                                                                                                                                                                                                                                                                                                                                                                                                                                  |                 |                 |                 |                 |                 |                 |                                                                                                                                                                                                                                                                                                                                                                                                                                                                                                                                                                                                  |                 |                 |                 |                 |                 |                 |                 |                 |
| EPI_ISL_9549279 |                                                                    |                                                                                                                                            | Jade Wang; et al.                                                                                                                                                                                                   |                   |                                                                                         |                                                                                                           |                                                                                                                                                                                                                                                                                                                                                                                                                                                                                                                                                                                                                                                                                                  |                 |                 |                 |                 |                 |                 |                                                                                                                                                                                                                                                                                                                                                                                                                                                                                                                                                                                                  |                 |                 |                 |                 |                 |                 |                 |                 |
| EPI_ISL_9549388 |                                                                    |                                                                                                                                            |                                                                                                                                                                                                                     |                   |                                                                                         |                                                                                                           |                                                                                                                                                                                                                                                                                                                                                                                                                                                                                                                                                                                                                                                                                                  |                 |                 |                 |                 |                 |                 |                                                                                                                                                                                                                                                                                                                                                                                                                                                                                                                                                                                                  |                 |                 |                 |                 |                 |                 |                 |                 |
| EPI_ISL_9549474 |                                                                    |                                                                                                                                            |                                                                                                                                                                                                                     |                   |                                                                                         |                                                                                                           |                                                                                                                                                                                                                                                                                                                                                                                                                                                                                                                                                                                                                                                                                                  |                 |                 |                 |                 |                 |                 |                                                                                                                                                                                                                                                                                                                                                                                                                                                                                                                                                                                                  |                 |                 |                 |                 |                 |                 |                 |                 |
| EPI_ISL_9549757 |                                                                    |                                                                                                                                            |                                                                                                                                                                                                                     |                   |                                                                                         |                                                                                                           |                                                                                                                                                                                                                                                                                                                                                                                                                                                                                                                                                                                                                                                                                                  |                 |                 |                 |                 |                 |                 |                                                                                                                                                                                                                                                                                                                                                                                                                                                                                                                                                                                                  |                 |                 |                 |                 |                 |                 |                 |                 |
| EPI_ISL_9521373 | EPI_ISL_9521374                                                    | EPI_ISL_9521375                                                                                                                            | EPI_ISL_9521376                                                                                                                                                                                                     | EPI_ISL_9521379   | EPI_ISL_9521381                                                                         | EPI_ISL_9521383                                                                                           | EPI_ISL_9521384                                                                                                                                                                                                                                                                                                                                                                                                                                                                                                                                                                                                                                                                                  | EPI_ISL_9521388 | EPI_ISL_9521390 | EPI_ISL_9521394 | EPI_ISL_9521395 | EPI_ISL_9521396 | EPI_ISL_9521399 | Adam Kotorashvili; Amiran Gamkrelidze.; Ana Pampakia; Ann Machabishvili; Anna Kasradze; Davit Tsaguria; Ekaterine Khmaladze; Ekaterine Zangaladze; Ekaterina Zhgenti; Giorgi Gogoladze; Giorgi Tomashvili; Gvantsa Brachveli; Gvantsa Chanturia; Irma Burjanadze; Ketevan Sandamiradze; Khatuna Zakhashvili; Lela Sabadze; Lela Urushadze; Magda Dgebudaze; Maia Alkhashvili; Mari Gavashelidze; Mariam Zakalashvili; Marine Murtukhvaladze; Meri Pantsalua; Noto Katara; Nino Berishvili; Paata Imnadze; Roena Sukhishvili; Salome Javashvili; Tamar Jashvishvili; Tata Imnadze; Tsa Tevdoradze |                 |                 |                 |                 |                 |                 |                 |                 |
| EPI_ISL_9236657 | EPI_ISL_9236740                                                    | EPI_ISL_9236764                                                                                                                            | EPI_ISL_9236838                                                                                                                                                                                                     | EPI_ISL_9268788   | EPI_ISL_9268789                                                                         | EPI_ISL_9268813                                                                                           | EPI_ISL_9268821                                                                                                                                                                                                                                                                                                                                                                                                                                                                                                                                                                                                                                                                                  | EPI_ISL_9268844 | EPI_ISL_9268846 | EPI_ISL_9268864 | EPI_ISL_9268866 | EPI_ISL_9268869 | EPI_ISL_9269023 | EPI_ISL_9269025                                                                                                                                                                                                                                                                                                                                                                                                                                                                                                                                                                                  | EPI_ISL_9269041 | EPI_ISL_9269044 | EPI_ISL_9269056 | EPI_ISL_9269057 | EPI_ISL_9269058 | EPI_ISL_9269059 |                 |                 |
| EPI_ISL_9269105 | EPI_ISL_9269115                                                    | EPI_ISL_9269116                                                                                                                            | EPI_ISL_9269139                                                                                                                                                                                                     | EPI_ISL_9269145   | EPI_ISL_9269154                                                                         | EPI_ISL_9269162                                                                                           | EPI_ISL_9269175                                                                                                                                                                                                                                                                                                                                                                                                                                                                                                                                                                                                                                                                                  | EPI_ISL_9269191 | EPI_ISL_9269195 | EPI_ISL_9269197 | EPI_ISL_9269224 | EPI_ISL_9269234 | EPI_ISL_9269250 | EPI_ISL_9269253                                                                                                                                                                                                                                                                                                                                                                                                                                                                                                                                                                                  | EPI_ISL_9269256 | EPI_ISL_9269275 | EPI_ISL_9269283 | EPI_ISL_9269321 | EPI_ISL_9269323 | EPI_ISL_9269333 |                 |                 |
| EPI_ISL_9269349 | EPI_ISL_9269370                                                    | EPI_ISL_9269381                                                                                                                            | EPI_ISL_9269388                                                                                                                                                                                                     | EPI_ISL_9269391   | EPI_ISL_9269394                                                                         | EPI_ISL_9269401                                                                                           | EPI_ISL_9269403                                                                                                                                                                                                                                                                                                                                                                                                                                                                                                                                                                                                                                                                                  | EPI_ISL_9269430 | EPI_ISL_9269443 | EPI_ISL_9269445 | EPI_ISL_9269463 | EPI_ISL_9269465 | EPI_ISL_9269503 | EPI_ISL_9269560                                                                                                                                                                                                                                                                                                                                                                                                                                                                                                                                                                                  | EPI_ISL_9269562 | EPI_ISL_9269566 | EPI_ISL_9269568 | EPI_ISL_9269574 | EPI_ISL_9269599 | EPI_ISL_9269620 |                 |                 |
| EPI_ISL_9269640 | EPI_ISL_9269712                                                    | EPI_ISL_9269768                                                                                                                            | EPI_ISL_9269791                                                                                                                                                                                                     | EPI_ISL_9269797   | EPI_ISL_9269819                                                                         | EPI_ISL_9269861                                                                                           | EPI_ISL_9269869                                                                                                                                                                                                                                                                                                                                                                                                                                                                                                                                                                                                                                                                                  | EPI_ISL_9269889 | EPI_ISL_9269901 | EPI_ISL_9269921 | EPI_ISL_9269927 | EPI_ISL_9269982 | EPI_ISL_9269996 | EPI_ISL_9269997                                                                                                                                                                                                                                                                                                                                                                                                                                                                                                                                                                                  | EPI_ISL_9269997 | EPI_ISL_9269997 | EPI_ISL_9269997 | EPI_ISL_9269997 | EPI_ISL_9269997 | EPI_ISL_9269997 | EPI_ISL_9270002 |                 |
| EPI_ISL_9270024 | EPI_ISL_9270044                                                    | EPI_ISL_9270051                                                                                                                            | EPI_ISL_9270092                                                                                                                                                                                                     | EPI_ISL_9270098   | EPI_ISL_9270122                                                                         | EPI_ISL_9270147                                                                                           | EPI_ISL_9270152                                                                                                                                                                                                                                                                                                                                                                                                                                                                                                                                                                                                                                                                                  | EPI_ISL_9270163 | EPI_ISL_9270172 | EPI_ISL_9270203 | EPI_ISL_9270224 | EPI_ISL_9270228 | EPI_ISL_9270229 | EPI_ISL_9270247                                                                                                                                                                                                                                                                                                                                                                                                                                                                                                                                                                                  | EPI_ISL_9270263 | EPI_ISL_9270317 | EPI_ISL_9270318 | EPI_ISL_9270320 | EPI_ISL_9270321 | EPI_ISL_9270335 | EPI_ISL_9270364 |                 |
| EPI_ISL_9270403 | EPI_ISL_9270407                                                    | EPI_ISL_9270423                                                                                                                            | EPI_ISL_9270437                                                                                                                                                                                                     | EPI_ISL_9270449   | EPI_ISL_9270467                                                                         | EPI_ISL_9270475                                                                                           | EPI_ISL_9270485                                                                                                                                                                                                                                                                                                                                                                                                                                                                                                                                                                                                                                                                                  | EPI_ISL_9270493 | EPI_ISL_9270504 | EPI_ISL_9270510 | EPI_ISL_9270562 | EPI_ISL_9270564 | EPI_ISL_9270564 | EPI_ISL_9270564                                                                                                                                                                                                                                                                                                                                                                                                                                                                                                                                                                                  | EPI_ISL_9270564 | EPI_ISL_9270573 | EPI_ISL_9270582 | EPI_ISL_9270609 | EPI_ISL_9270623 | EPI_ISL_9270649 | EPI_ISL_9270667 |                 |
| EPI_ISL_9270667 | EPI_ISL_9270674                                                    | EPI_ISL_9270684                                                                                                                            | EPI_ISL_9270739                                                                                                                                                                                                     | EPI_ISL_9270782   | EPI_ISL_9270785                                                                         | EPI_ISL_9270790                                                                                           | EPI_ISL_9270802                                                                                                                                                                                                                                                                                                                                                                                                                                                                                                                                                                                                                                                                                  | EPI_ISL_9270803 | EPI_ISL_9270808 | EPI_ISL_9270831 | EPI_ISL_9270842 | EPI_ISL_9270843 | EPI_ISL_9270873 | EPI_ISL_9270881                                                                                                                                                                                                                                                                                                                                                                                                                                                                                                                                                                                  | EPI_ISL_9270896 | EPI_ISL_9270905 | EPI_ISL_9270909 | EPI_ISL_9270934 | EPI_ISL_9270935 | EPI_ISL_9270935 | EPI_ISL_9270935 |                 |
| EPI_ISL_9270939 | EPI_ISL_9270947                                                    | EPI_ISL_9270954                                                                                                                            | EPI_ISL_9270961                                                                                                                                                                                                     | EPI_ISL_9270968   | EPI_ISL_9270993                                                                         | EPI_ISL_9271037                                                                                           | EPI_ISL_9271052                                                                                                                                                                                                                                                                                                                                                                                                                                                                                                                                                                                                                                                                                  | EPI_ISL_9271066 | EPI_ISL_9271101 | EPI_ISL_9271114 | EPI_ISL_9271120 | EPI_ISL_9271121 | EPI_ISL_9271121 | EPI_ISL_9271156                                                                                                                                                                                                                                                                                                                                                                                                                                                                                                                                                                                  | EPI_ISL_9271193 | EPI_ISL_9271194 | EPI_ISL_9271195 | EPI_ISL_9271196 | EPI_ISL_9271206 | EPI_ISL_9271209 | EPI_ISL_9271209 |                 |
| EPI_ISL_9271231 | EPI_ISL_9271274                                                    | EPI_ISL_9271275                                                                                                                            | EPI_ISL_9271291                                                                                                                                                                                                     | EPI_ISL_9271326   | EPI_ISL_9271348                                                                         | EPI_ISL_9271367                                                                                           | EPI_ISL_9271381                                                                                                                                                                                                                                                                                                                                                                                                                                                                                                                                                                                                                                                                                  | EPI_ISL_9271447 | EPI_ISL_9271456 | EPI_ISL_9271474 | EPI_ISL_9271482 | EPI_ISL_9271487 | EPI_ISL_9271489 | EPI_ISL_9271499                                                                                                                                                                                                                                                                                                                                                                                                                                                                                                                                                                                  | EPI_ISL_9271505 | EPI_ISL_9271533 | EPI_ISL_9271546 | EPI_ISL_9271559 | EPI_ISL_9271605 | EPI_ISL_9271606 | EPI_ISL_9271606 |                 |
| EPI_ISL_9271606 | EPI_ISL_9271616                                                    | EPI_ISL_9358044                                                                                                                            | EPI_ISL_9358071                                                                                                                                                                                                     | EPI_ISL_9358091   | EPI_ISL_9358137                                                                         | EPI_ISL_9358150                                                                                           | EPI_ISL_9358188                                                                                                                                                                                                                                                                                                                                                                                                                                                                                                                                                                                                                                                                                  | EPI_ISL_9358194 | EPI_ISL_9358207 | EPI_ISL_9358213 | EPI_ISL_9358225 | EPI_ISL_9358231 | EPI_ISL_9358232 | EPI_ISL_9358233                                                                                                                                                                                                                                                                                                                                                                                                                                                                                                                                                                                  | EPI_ISL_9358236 | EPI_ISL_9358243 | EPI_ISL_9358248 | EPI_ISL_9358248 | EPI_ISL_9358248 | EPI_ISL_9358257 |                 |                 |
| EPI_ISL_9358260 | EPI_ISL_9358272                                                    | EPI_ISL_9358277                                                                                                                            | EPI_ISL_9358328                                                                                                                                                                                                     | EPI_ISL_9358331</ |                                                                                         |                                                                                                           |                                                                                                                                                                                                                                                                                                                                                                                                                                                                                                                                                                                                                                                                                                  |                 |                 |                 |                 |                 |                 |                                                                                                                                                                                                                                                                                                                                                                                                                                                                                                                                                                                                  |                 |                 |                 |                 |                 |                 |                 |                 |





|                                                                                                                                                                                                                                                                                                                                                                                                                                                                                                                                                                                                                                                                                                                                                                                                                                                                                                                                                                                                                                                                                                                                                                                                                                                                                         |                                                               |                                                                                                                                                                                                                    |                                                                                                                                                                                                                                                                                                                                                                                             |                                                                                                                                                                                                      |
|-----------------------------------------------------------------------------------------------------------------------------------------------------------------------------------------------------------------------------------------------------------------------------------------------------------------------------------------------------------------------------------------------------------------------------------------------------------------------------------------------------------------------------------------------------------------------------------------------------------------------------------------------------------------------------------------------------------------------------------------------------------------------------------------------------------------------------------------------------------------------------------------------------------------------------------------------------------------------------------------------------------------------------------------------------------------------------------------------------------------------------------------------------------------------------------------------------------------------------------------------------------------------------------------|---------------------------------------------------------------|--------------------------------------------------------------------------------------------------------------------------------------------------------------------------------------------------------------------|---------------------------------------------------------------------------------------------------------------------------------------------------------------------------------------------------------------------------------------------------------------------------------------------------------------------------------------------------------------------------------------------|------------------------------------------------------------------------------------------------------------------------------------------------------------------------------------------------------|
| EPI_ISL_9627834                                                                                                                                                                                                                                                                                                                                                                                                                                                                                                                                                                                                                                                                                                                                                                                                                                                                                                                                                                                                                                                                                                                                                                                                                                                                         | Diagnostyka Sp. z o.o. Szczecin                               | Wojewodzka Stacja Sanitarno-Epidemiologiczna w Gorzowie Wielkopolskim                                                                                                                                              | Ezbieta Justynska; Klaudia Kobenzda-Wlodarczak; Patrycja Faberska; Patrycja Rakowska and Marek Margol; Renata Siegel                                                                                                                                                                                                                                                                        |                                                                                                                                                                                                      |
| EPI_ISL_9673243, EPI_ISL_9673246, EPI_ISL_9673251, EPI_ISL_9673259, EPI_ISL_9673268, EPI_ISL_9673269, EPI_ISL_9673275, EPI_ISL_9673276, EPI_ISL_9673296                                                                                                                                                                                                                                                                                                                                                                                                                                                                                                                                                                                                                                                                                                                                                                                                                                                                                                                                                                                                                                                                                                                                 | see above                                                     | Diagnostyka Sp. z o.o. Gdańsk                                                                                                                                                                                      | 1. Tricity SARS-CoV-2 sequencing consortium: University of Gdansk, Medical University of Gdansk, Vaxican Ltd., Invicta Ltd. 2. National Institute of Public Health - National Institute of Hygiene, Warsaw, Poland                                                                                                                                                                          |                                                                                                                                                                                                      |
| EPI_ISL_9561938                                                                                                                                                                                                                                                                                                                                                                                                                                                                                                                                                                                                                                                                                                                                                                                                                                                                                                                                                                                                                                                                                                                                                                                                                                                                         | Dianalabs SA                                                  | Genesupport                                                                                                                                                                                                        | Celina Cybulska; Karolina Gackowska; Katarzyna Groth; Katarzyna Zacharczuk; Krystyna Bienkowska Szewczyk; Lukasz Rabalski; Maciej Gryzbek; Maciej Kosinski; Magdalena Nowakowska; Marcin Lubocki; Małgorzata Sadkowska-Todys; Tomasz Wołkowicz                                                                                                                                              |                                                                                                                                                                                                      |
| EPI_ISL_9703223, EPI_ISL_9703224                                                                                                                                                                                                                                                                                                                                                                                                                                                                                                                                                                                                                                                                                                                                                                                                                                                                                                                                                                                                                                                                                                                                                                                                                                                        | Diponegoro Kimia Farma Laboratory                             | West Java Health Laboratory; School of Life Sciences and Technology, Institut Teknologi Bandung                                                                                                                    | Azzania Fibriani; Cut Nur Cinthia Alamanda; Ema Rahmawati; Karimatu Khoirunnisa; Miftahul Faridi; Rifky Waluyajati Rachman; Rini Robiani; Ryan Bayusantika Ristandi                                                                                                                                                                                                                         |                                                                                                                                                                                                      |
| EPI_ISL_9413786, EPI_ISL_9413787, EPI_ISL_9413791, EPI_ISL_9413794, EPI_ISL_9413795, EPI_ISL_9712029, EPI_ISL_9712030, EPI_ISL_9712031, EPI_ISL_9712063, EPI_ISL_9712082, EPI_ISL_9712083                                                                                                                                                                                                                                                                                                                                                                                                                                                                                                                                                                                                                                                                                                                                                                                                                                                                                                                                                                                                                                                                                               | see above                                                     | Division of Medical Virology, National Health Laboratory Service (NHLs), Tygerberg Hospital / Stellenbosch University                                                                                              | Division of Medical Virology, National Health Laboratory Service (NHLs), Tygerberg Hospital / Stellenbosch University                                                                                                                                                                                                                                                                       |                                                                                                                                                                                                      |
| EPI_ISL_9528297, EPI_ISL_9616341                                                                                                                                                                                                                                                                                                                                                                                                                                                                                                                                                                                                                                                                                                                                                                                                                                                                                                                                                                                                                                                                                                                                                                                                                                                        | Dutch COVID-19 response team                                  | Erasmus Medical Center                                                                                                                                                                                             | Anne van der Linden; Annemiek van der Eijk; Bas Oude Munnink; Corine GeurtsvanKessel; David Nieuwenhuijse; Emmanuelle Munge; Irina Chestakova; Marion Koopmans; Marjan Boter; Reina Sikkema; Richard Molenkamp; on behalf of the Dutch national COVID-19 response team.                                                                                                                     |                                                                                                                                                                                                      |
| EPI_ISL_9751677, EPI_ISL_9751768                                                                                                                                                                                                                                                                                                                                                                                                                                                                                                                                                                                                                                                                                                                                                                                                                                                                                                                                                                                                                                                                                                                                                                                                                                                        | Dutch COVID-19 response team                                  | Medical Microbiology, Maastricht University Medical Centre                                                                                                                                                         | Brian van der Veer*; Carmen Reumkens; Christian Hoebe; Erik Beuken; Jozef Dingemans*; Lieke van Alphen; Paul Savelkoul                                                                                                                                                                                                                                                                      |                                                                                                                                                                                                      |
| EPI_ISL_9530875, EPI_ISL_9776048, EPI_ISL_9776095, EPI_ISL_9776268, EPI_ISL_9776376, EPI_ISL_9776377, EPI_ISL_9776378, EPI_ISL_9776394, EPI_ISL_9776403, EPI_ISL_9776729, EPI_ISL_9776732, EPI_ISL_9776739                                                                                                                                                                                                                                                                                                                                                                                                                                                                                                                                                                                                                                                                                                                                                                                                                                                                                                                                                                                                                                                                              | see above                                                     | Dutch COVID-19 response team                                                                                                                                                                                       | National Institute for Public Health and the Environment (RIVM)                                                                                                                                                                                                                                                                                                                             |                                                                                                                                                                                                      |
| EPI_ISL_9798385, EPI_ISL_9798394, EPI_ISL_9798406                                                                                                                                                                                                                                                                                                                                                                                                                                                                                                                                                                                                                                                                                                                                                                                                                                                                                                                                                                                                                                                                                                                                                                                                                                       | EUROFINS CBM 69 MEDIPOLE                                      | CNR Virus des Infections Respiratoires - France SUD                                                                                                                                                                | Antonin Bal; Bruno Lina; Bruno Simon; Gregory Destras; Gwendolyne Burfin; Hadrien Regue; Laurence Josset; Martine Valette; Quentin Semanas; Theophile Boyer                                                                                                                                                                                                                                 |                                                                                                                                                                                                      |
| EPI_ISL_9801167, EPI_ISL_9801203, EPI_ISL_9801205, EPI_ISL_9801207, EPI_ISL_9801208, EPI_ISL_9801209, EPI_ISL_9801210, EPI_ISL_9801213, EPI_ISL_9801214, EPI_ISL_9801216, EPI_ISL_9801217, EPI_ISL_9801219, EPI_ISL_9801220, EPI_ISL_9801221, EPI_ISL_9801222, EPI_ISL_9801223, EPI_ISL_9801225, EPI_ISL_9801226, EPI_ISL_9801227, EPI_ISL_9801228, EPI_ISL_9801229, EPI_ISL_9801230, EPI_ISL_9801231, EPI_ISL_9801232, EPI_ISL_9801329, EPI_ISL_9801331, EPI_ISL_9801336, EPI_ISL_9801338, EPI_ISL_9801342, EPI_ISL_9801346, EPI_ISL_9801347, EPI_ISL_9801348, EPI_ISL_9801352, EPI_ISL_9801353, EPI_ISL_9801354, EPI_ISL_9801357, EPI_ISL_9801358, EPI_ISL_9801359, EPI_ISL_9801361, EPI_ISL_9801362, EPI_ISL_9801363, EPI_ISL_9801364, EPI_ISL_9801366, EPI_ISL_9801368, EPI_ISL_9801369, EPI_ISL_9801370, EPI_ISL_9801372, EPI_ISL_9801374, EPI_ISL_9801375, EPI_ISL_9801376, EPI_ISL_9801377, EPI_ISL_9801379, EPI_ISL_9801380, EPI_ISL_9801381, EPI_ISL_9801383, EPI_ISL_9801384, EPI_ISL_9801385, EPI_ISL_9801386, EPI_ISL_9801390, EPI_ISL_9801391, EPI_ISL_9801392, EPI_ISL_9801393, EPI_ISL_9801394, EPI_ISL_9801395, EPI_ISL_9801397, EPI_ISL_9801398, EPI_ISL_9801400, EPI_ISL_9801405, EPI_ISL_9801407, EPI_ISL_9801410, EPI_ISL_9801414, EPI_ISL_9801421, EPI_ISL_9801422 | see above                                                     | Edmonton Provincial Lab                                                                                                                                                                                            | Alberta Precision Labs (APL)                                                                                                                                                                                                                                                                                                                                                                | Buss; Croxen M; Deo A; Dieu P; E; Ferrato C; Gill K; Koleva P; Li V; Lloyd C; Lynch T; Ma R; Murphy S; Pabbaraju K; Shideler S.; Shokoples S; Skitsko T; Thayer J; Tipples G; Wong A; Yu C; Zelyas N |
| EPI_ISL_9554254                                                                                                                                                                                                                                                                                                                                                                                                                                                                                                                                                                                                                                                                                                                                                                                                                                                                                                                                                                                                                                                                                                                                                                                                                                                                         | Enfer                                                         | Enfer                                                                                                                                                                                                              | Elaine M. Kenny; Suzie Coughlan                                                                                                                                                                                                                                                                                                                                                             |                                                                                                                                                                                                      |
| EPI_ISL_9604716, EPI_ISL_9604760                                                                                                                                                                                                                                                                                                                                                                                                                                                                                                                                                                                                                                                                                                                                                                                                                                                                                                                                                                                                                                                                                                                                                                                                                                                        | EspaceBio Laboratoire                                         | Department of Virology, Henri Mondor University Hospital, Assistance Publique Hôpitaux de Paris, Université Paris-Est Créteil, INSERM U955                                                                         | Alexandre Soulier; Christophe Rodriguez; Elisabeth Trawinski; Guillaume Gricourt; Jean-Michel Pawlotsky; Melissa N'Debi; Slim Fourati; Vanessa Demontant                                                                                                                                                                                                                                    |                                                                                                                                                                                                      |
| EPI_ISL_9650810, EPI_ISL_9650812, EPI_ISL_9650813, EPI_ISL_9650814, EPI_ISL_9650834                                                                                                                                                                                                                                                                                                                                                                                                                                                                                                                                                                                                                                                                                                                                                                                                                                                                                                                                                                                                                                                                                                                                                                                                     | Faculty Hospital Bulovka, Department of Clinical Microbiology | Charles University, Faculty of Science, BIOCEV, OMICS Genomics                                                                                                                                                     | Alžběta Bučková; Blanka Hamplová; Ingrid Poláková; Jiří Novák; Nela Václavíková; Ruth Tachezy; Sebastian Cristian Treitli; Vladimír Hampl; Zoltán Fűssy; Štěpánka Hrdá                                                                                                                                                                                                                      |                                                                                                                                                                                                      |
| EPI_ISL_9382592, EPI_ISL_9428647, EPI_ISL_9525931, EPI_ISL_9664788                                                                                                                                                                                                                                                                                                                                                                                                                                                                                                                                                                                                                                                                                                                                                                                                                                                                                                                                                                                                                                                                                                                                                                                                                      | Fulgent Genetics                                              | Centers for Disease Control and Prevention Division of Viral Diseases, Pathogen Discovery                                                                                                                          | Becky Tsai; Benafsh Sapra; Benjamin Rambo-Martin; Christopher Gulvick; Clinton Paden; Dakota Howard; Dhvani Batra; Doreen Ng; Duncan MacCannell; Erisa Sula; Harry Gao; James Xie; Jason Caravas; John Gao; Joseph Fierro; Kristine Lacek; Matthew Schmerer; Mickey Li; Peter Cook; Scott Sammons; Shatavia Morrison; Tymeckia Kendall; Victoria Caban Figueroa; Yan Meng; Yvette Unoarumhi |                                                                                                                                                                                                      |
| EPI_ISL_9525997, EPI_ISL_9526002, EPI_ISL_9526037, EPI_ISL_9526048                                                                                                                                                                                                                                                                                                                                                                                                                                                                                                                                                                                                                                                                                                                                                                                                                                                                                                                                                                                                                                                                                                                                                                                                                      | Fundacio Althai-a-Manresa                                     | Banc de Sang i Teixits                                                                                                                                                                                             | Carina Lera; Carlos Hobeich; Francisco Vidal; Irene Corrales; Lorena Ramírez; Maria Glòria Soria; Natàlia Comes; Nina Borràs; Noemí Gonzalez; Sílvia Saulela                                                                                                                                                                                                                                |                                                                                                                                                                                                      |
| EPI_ISL_9428424, EPI_ISL_9520244                                                                                                                                                                                                                                                                                                                                                                                                                                                                                                                                                                                                                                                                                                                                                                                                                                                                                                                                                                                                                                                                                                                                                                                                                                                        | GH A.CHENEVIER-H.MONDOR                                       | Department of Virology, Henri Mondor University Hospital, Assistance Publique Hôpitaux de Paris, Université Paris-Est Créteil, INSERM U955                                                                         | Alexandre Soulier; Christophe Rodriguez; Elisabeth Trawinski; Guillaume Gricourt; Jean-Michel Pawlotsky; Melissa N'Debi; Slim Fourati; Vanessa Demontant                                                                                                                                                                                                                                    |                                                                                                                                                                                                      |
| EPI_ISL_9775167                                                                                                                                                                                                                                                                                                                                                                                                                                                                                                                                                                                                                                                                                                                                                                                                                                                                                                                                                                                                                                                                                                                                                                                                                                                                         | GMERS Medical College, Junagadh                               | Gujarat Biotechnology Research Centre                                                                                                                                                                              | Akhilesh Modi; Apurvasinh Puvar; Bhadeshsinh Gohil; Chaitanya Joshi; Disha Vora; Janvi Raval; Jaykumar Rangani; Madhvi Joshi; Nimesh Patel; Nitin Savaliya; NitinShukla; Priyank Chavda; Ramesh Pandit; Roshani Mishra; Sonal Sharma; Tasnim Trivedi; Zarna Patel                                                                                                                           |                                                                                                                                                                                                      |
| EPI_ISL_9775211, EPI_ISL_9775212, EPI_ISL_9775213, EPI_ISL_9775214, EPI_ISL_9775215, EPI_ISL_9775216                                                                                                                                                                                                                                                                                                                                                                                                                                                                                                                                                                                                                                                                                                                                                                                                                                                                                                                                                                                                                                                                                                                                                                                    | GMERS Medical College, Valsad                                 | Gujarat Biotechnology Research Centre                                                                                                                                                                              | Akhilesh Modi; Apurvasinh Puvar; Bhadeshsinh Gohil; Chaitanya Joshi; Disha Vora; Janvi Raval; Jaykumar Rangani; Madhvi Joshi; Nimesh Patel; Nitin Savaliya; NitinShukla; Priyank Chavda; Ramesh Pandit; Roshani Mishra; Sonal Sharma; Tasnim Trivedi; Vicky Gandhi; Zarna Patel                                                                                                             |                                                                                                                                                                                                      |
| EPI_ISL_9533286, EPI_ISL_9533288, EPI_ISL_9533292, EPI_ISL_9533294, EPI_ISL_9533295, EPI_ISL_9533296, EPI_ISL_9533297, EPI_ISL_9533299, EPI_ISL_9533301, EPI_ISL_9533302, EPI_ISL_9533304, EPI_ISL_9533306, EPI_ISL_9533316, EPI_ISL_9533320, EPI_ISL_9533322, EPI_ISL_9533323, EPI_ISL_9533327, EPI_ISL_9533328, EPI_ISL_9533330, EPI_ISL_9533331, EPI_ISL_9533332, EPI_ISL_9533334, EPI_ISL_9533335, EPI_ISL_9533340, EPI_ISL_9533346, EPI_ISL_9533347, EPI_ISL_9533348, EPI_ISL_9533349, EPI_ISL_9533352, EPI_ISL_9533361, EPI_ISL_9533372, EPI_ISL_9533373, EPI_ISL_9533375, EPI_ISL_9533384, EPI_ISL_9533386, EPI_ISL_9533387, EPI_ISL_9533389, EPI_ISL_9533391, EPI_ISL_9533403, EPI_ISL_9533405, EPI_ISL_9533407, EPI_ISL_9533408, EPI_ISL_9533409, EPI_ISL_9533413, EPI_ISL_9533414, EPI_ISL_9533435, EPI_ISL_9533445                                                                                                                                                                                                                                                                                                                                                                                                                                                           | see above                                                     | Gandhi Medical College and Hospital (GMCH), Secundarabad                                                                                                                                                           | NIV Influenza                                                                                                                                                                                                                                                                                                                                                                               | D.R.Manisha Rani; Dr.G.Sushma Rajya Lakshmi; Dr.K.Nagamani; Dr.Sunitha Pakalapaty                                                                                                                    |
| EPI_ISL_9673517, EPI_ISL_9673524, EPI_ISL_9673525                                                                                                                                                                                                                                                                                                                                                                                                                                                                                                                                                                                                                                                                                                                                                                                                                                                                                                                                                                                                                                                                                                                                                                                                                                       | GeneMe Labs, ul. Potokowa 10A, 80-283 Gdańsk                  | 1. Tricity SARS-CoV-2 sequencing consortium: University of Gdansk, Medical University of Gdansk, Vaxican Ltd., Invicta Ltd. 2. National Institute of Public Health - National Institute of Hygiene, Warsaw, Poland | Celina Cybulska; Karolina Gackowska; Katarzyna Groth; Katarzyna Zacharczuk; Krystyna Bienkowska Szewczyk; Lukasz Rabalski; Maciej Gryzbek; Maciej Kosinski; Magdalena Nowakowska; Marcin Lubocki; Małgorzata Sadkowska-Todys; Tomasz Wołkowicz                                                                                                                                              |                                                                                                                                                                                                      |
| EPI_ISL_9594927                                                                                                                                                                                                                                                                                                                                                                                                                                                                                                                                                                                                                                                                                                                                                                                                                                                                                                                                                                                                                                                                                                                                                                                                                                                                         | General Hospital "Abdulah Nakas# Sarajevo                     | Alea Genetic Centre                                                                                                                                                                                                | Dino Pecar; Ivana Ceko; Lana Salihfendic; Rijad Konjhodzic                                                                                                                                                                                                                                                                                                                                  |                                                                                                                                                                                                      |
| EPI_ISL_9710028, EPI_ISL_9710029                                                                                                                                                                                                                                                                                                                                                                                                                                                                                                                                                                                                                                                                                                                                                                                                                                                                                                                                                                                                                                                                                                                                                                                                                                                        | Genetica Molecular and Subdepartamento de Virologia ISP Chile | Instituto de Salud Publica de Chile                                                                                                                                                                                | Andres Castillo; Barbara Parra; Constanza Campano; Jorge Fernandez; Karen Orostica; Patricia Bustos; Rodrigo Fasce                                                                                                                                                                                                                                                                          |                                                                                                                                                                                                      |
| EPI_ISL_9612679, EPI_ISL_9612680, EPI_ISL_9775204                                                                                                                                                                                                                                                                                                                                                                                                                                                                                                                                                                                                                                                                                                                                                                                                                                                                                                                                                                                                                                                                                                                                                                                                                                       | Genexplore Diagnostic center, Ahmedabad                       | Gujarat Biotechnology Research Centre                                                                                                                                                                              | Akhilesh Modi; Apurvasinh Puvar; Ashish Patel; Bhadeshsinh Gohil; Chaitanya Joshi; Disha Vora; Janvi Raval; Jaykumar Rangani; Madhvi Joshi; Nimesh Patel; Nitin Savaliya; NitinShukla; Priyank Chavda; Ramesh Pandit; Roshani Mishra; Sonal Sharma; Tasnim Trivedi; Zarna Patel                                                                                                             |                                                                                                                                                                                                      |
| EPI_ISL_9775256, EPI_ISL_9775257                                                                                                                                                                                                                                                                                                                                                                                                                                                                                                                                                                                                                                                                                                                                                                                                                                                                                                                                                                                                                                                                                                                                                                                                                                                        | Government Medical College, Bhavnagar                         | Gujarat Biotechnology Research Centre                                                                                                                                                                              | Akhilesh Modi; Apurvasinh Puvar; Bhadeshsinh Gohil; Chaitanya Joshi; Disha Vora; Janvi Raval; Jaykumar Rangani; Kairavi Desai; Madhvi Joshi; Nimesh Patel; Nitin Savaliya; NitinShukla; Priyank Chavda; Ramesh Pandit; Roshani Mishra; Sonal Sharma; Tasnim Trivedi; Zarna Patel                                                                                                            |                                                                                                                                                                                                      |
| EPI_ISL_9775169, EPI_ISL_9775199, EPI_ISL_9775201, EPI_ISL_9775202, EPI_ISL_9775203                                                                                                                                                                                                                                                                                                                                                                                                                                                                                                                                                                                                                                                                                                                                                                                                                                                                                                                                                                                                                                                                                                                                                                                                     | Government Medical College, Surat                             | Gujarat Biotechnology Research Centre                                                                                                                                                                              | Akhilesh Modi; Apurvasinh Puvar; Bhadeshsinh Gohil; Chaitanya Joshi; Disha Vora; Janvi Raval; Jaykumar Rangani; Madhvi Joshi; Netta Khandelwal; Nimesh Patel; Nitin Savaliya; NitinShukla; Priyank Chavda; Ramesh Pandit; Roshani Mishra; Sonal Sharma; Tasnim Trivedi; Zarna Patel                                                                                                         |                                                                                                                                                                                                      |
| EPI_ISL_9711960, EPI_ISL_9711961, EPI_ISL_9711962, EPI_ISL_9711964, EPI_ISL_9711965, EPI_ISL_9711966, EPI_ISL_9711967, EPI_ISL_9711969                                                                                                                                                                                                                                                                                                                                                                                                                                                                                                                                                                                                                                                                                                                                                                                                                                                                                                                                                                                                                                                                                                                                                  | see above                                                     | Guam Public Health Laboratory                                                                                                                                                                                      | State Laboratories Division, Hawaii State Department of Health                                                                                                                                                                                                                                                                                                                              |                                                                                                                                                                                                      |
| EPI_ISL_9606349                                                                                                                                                                                                                                                                                                                                                                                                                                                                                                                                                                                                                                                                                                                                                                                                                                                                                                                                                                                                                                                                                                                                                                                                                                                                         | H Santarem                                                    | Instituto Nacional de Saude (INSA)                                                                                                                                                                                 | Borges et al                                                                                                                                                                                                                                                                                                                                                                                |                                                                                                                                                                                                      |
| EPI_ISL_9606348                                                                                                                                                                                                                                                                                                                                                                                                                                                                                                                                                                                                                                                                                                                                                                                                                                                                                                                                                                                                                                                                                                                                                                                                                                                                         | H Vila Franca Xira                                            | Instituto Nacional de Saude (INSA)                                                                                                                                                                                 | Borges et al                                                                                                                                                                                                                                                                                                                                                                                |                                                                                                                                                                                                      |
| EPI_ISL_9727110, EPI_ISL_9727114, EPI_ISL_9727125, EPI_ISL_9727137                                                                                                                                                                                                                                                                                                                                                                                                                                                                                                                                                                                                                                                                                                                                                                                                                                                                                                                                                                                                                                                                                                                                                                                                                      | HAD - Noble Hospital                                          | RF-IISER Pune                                                                                                                                                                                                      | Aurnab Ghose; Joy Merwin Monteiro; Krishanpal Karmodya                                                                                                                                                                                                                                                                                                                                      |                                                                                                                                                                                                      |
| EPI_ISL_9796528                                                                                                                                                                                                                                                                                                                                                                                                                                                                                                                                                                                                                                                                                                                                                                                                                                                                                                                                                                                                                                                                                                                                                                                                                                                                         | HOPITAL NOTRE-DAME LA MISERICORDE                             | CNR Virus des Infections Respiratoires - France SUD                                                                                                                                                                | Antonin Bal; Bruno Lina; Bruno Simon; Gregory Destras; Gwendolyne Burfin; Hadrien Regue; Laurence Josset; Martine Valette; Quentin Semanas; Theophile Boyer                                                                                                                                                                                                                                 |                                                                                                                                                                                                      |
| EPI_ISL_9603500                                                                                                                                                                                                                                                                                                                                                                                                                                                                                                                                                                                                                                                                                                                                                                                                                                                                                                                                                                                                                                                                                                                                                                                                                                                                         | HOPITAL ROBERT BOULIN                                         | CNR Virus des Infections Respiratoires - France SUD                                                                                                                                                                | Antonin Bal; Bruno Lina; Bruno Simon; Gregory Destras; Gwendolyne Burfin; Hadrien Regue; Laurence Josset; Martine Valette; Quentin Semanas; Theophile Boyer                                                                                                                                                                                                                                 |                                                                                                                                                                                                      |
| EPI_ISL_9648306                                                                                                                                                                                                                                                                                                                                                                                                                                                                                                                                                                                                                                                                                                                                                                                                                                                                                                                                                                                                                                                                                                                                                                                                                                                                         | HOSPITAL MANACOR                                              | HOSPITAL UNIVERSITARIO SON ESPASES                                                                                                                                                                                 | Dr. Antonio Oliver; Dr. Carla López-Causapé; Dr. Gabriel Cabot; Hospital Universitario Son Espases; on behalf of Servicio de Microbiología                                                                                                                                                                                                                                                  |                                                                                                                                                                                                      |
| EPI_ISL_9648239, EPI_ISL_9648247, EPI_ISL_9648251, EPI_ISL_9648262, EPI_ISL_9648270, EPI_ISL_9648274, EPI_ISL_9648282, EPI_ISL_9648294                                                                                                                                                                                                                                                                                                                                                                                                                                                                                                                                                                                                                                                                                                                                                                                                                                                                                                                                                                                                                                                                                                                                                  | see above                                                     | HOSPITAL MATEU ORFLA                                                                                                                                                                                               | HOSPITAL UNIVERSITARIO SON ESPASES                                                                                                                                                                                                                                                                                                                                                          |                                                                                                                                                                                                      |
| EPI_ISL_9690932, EPI_ISL_9690933, EPI_ISL_9690941                                                                                                                                                                                                                                                                                                                                                                                                                                                                                                                                                                                                                                                                                                                                                                                                                                                                                                                                                                                                                                                                                                                                                                                                                                       | HOSPITAL UNIVERSITARI DE BELLVITGE                            | Microbiology Department                                                                                                                                                                                            | Dr. Antonio Oliver; Dr. Carla López-Causapé; Dr. Gabriel Cabot; Hospital Universitario Son Espases; on behalf of Servicio de Microbiología                                                                                                                                                                                                                                                  |                                                                                                                                                                                                      |
|                                                                                                                                                                                                                                                                                                                                                                                                                                                                                                                                                                                                                                                                                                                                                                                                                                                                                                                                                                                                                                                                                                                                                                                                                                                                                         |                                                               |                                                                                                                                                                                                                    | Aida Gonzalez-Diaz; Antonio Gonzalo; Carmen Ardanuy; Daniel Rodríguez-Osorio; Jordi Camara; Jordi Niubó; Laura Calatayud; M Angeles Domínguez; Sara Martí; Veronica Saez; Yolanda Hernandez                                                                                                                                                                                                 |                                                                                                                                                                                                      |

|                                                                                                                                                                                                                                                                                                                                                                                                                                                                                                                                                                                                                                                                                                                                                                                                                                                                                                                                                                                                                                                                                                                                                                                                                                                                                                                                                                              |                                                                                                    |                                                                                                                                                                                           |                                                                                                                                                                                                                                                                             |                                                                                                                                                                                                                                                                                                                                                                             |
|------------------------------------------------------------------------------------------------------------------------------------------------------------------------------------------------------------------------------------------------------------------------------------------------------------------------------------------------------------------------------------------------------------------------------------------------------------------------------------------------------------------------------------------------------------------------------------------------------------------------------------------------------------------------------------------------------------------------------------------------------------------------------------------------------------------------------------------------------------------------------------------------------------------------------------------------------------------------------------------------------------------------------------------------------------------------------------------------------------------------------------------------------------------------------------------------------------------------------------------------------------------------------------------------------------------------------------------------------------------------------|----------------------------------------------------------------------------------------------------|-------------------------------------------------------------------------------------------------------------------------------------------------------------------------------------------|-----------------------------------------------------------------------------------------------------------------------------------------------------------------------------------------------------------------------------------------------------------------------------|-----------------------------------------------------------------------------------------------------------------------------------------------------------------------------------------------------------------------------------------------------------------------------------------------------------------------------------------------------------------------------|
| EPI_ISL_9690942, EPI_ISL_9690943                                                                                                                                                                                                                                                                                                                                                                                                                                                                                                                                                                                                                                                                                                                                                                                                                                                                                                                                                                                                                                                                                                                                                                                                                                                                                                                                             |                                                                                                    |                                                                                                                                                                                           |                                                                                                                                                                                                                                                                             |                                                                                                                                                                                                                                                                                                                                                                             |
| EPI_ISL_9648302                                                                                                                                                                                                                                                                                                                                                                                                                                                                                                                                                                                                                                                                                                                                                                                                                                                                                                                                                                                                                                                                                                                                                                                                                                                                                                                                                              | HOSPITAL UNIVERSITARIO SON ESPASES                                                                 | HOSPITAL UNIVERSITARIO SON ESPASES                                                                                                                                                        |                                                                                                                                                                                                                                                                             | Dr. Antonio Oliver; Dr. Carla López-Causapé; Dr. Gabriel Cabot; Hospital Universitario Son Espases; on behalf of Servicio de Microbiología                                                                                                                                                                                                                                  |
| EPI_ISL_9698474                                                                                                                                                                                                                                                                                                                                                                                                                                                                                                                                                                                                                                                                                                                                                                                                                                                                                                                                                                                                                                                                                                                                                                                                                                                                                                                                                              | Hannover Medical School, Institute of Virology                                                     | Hannover Medical School, Institute of Virology                                                                                                                                            |                                                                                                                                                                                                                                                                             | Lars Steinbrück                                                                                                                                                                                                                                                                                                                                                             |
| EPI_ISL_9310065, EPI_ISL_9310069, EPI_ISL_9360184, EPI_ISL_9360320, EPI_ISL_9360323, EPI_ISL_9360328, EPI_ISL_9360361, EPI_ISL_9360366, EPI_ISL_9360440, EPI_ISL_9363570, EPI_ISL_9363922, EPI_ISL_9364051, EPI_ISL_9379503, EPI_ISL_9379515, EPI_ISL_9399337, EPI_ISL_9399360, EPI_ISL_9399391, EPI_ISL_9399395, EPI_ISL_9399409, EPI_ISL_9399441, EPI_ISL_9399455, EPI_ISL_9399510, EPI_ISL_9399533, EPI_ISL_9399579, EPI_ISL_9399609, EPI_ISL_9399842, EPI_ISL_9440339, EPI_ISL_9440430, EPI_ISL_9440460, EPI_ISL_9440545, EPI_ISL_9440653, EPI_ISL_9440667, EPI_ISL_9440673, EPI_ISL_9440675, EPI_ISL_9441065, EPI_ISL_9441066, EPI_ISL_9441075, EPI_ISL_9441083, EPI_ISL_9446386, EPI_ISL_9446570, EPI_ISL_9449447, EPI_ISL_9449765, EPI_ISL_9567641                                                                                                                                                                                                                                                                                                                                                                                                                                                                                                                                                                                                                    |                                                                                                    | Wellcome Sanger Institute for the COVID-19 Genomics UK (COG-UK) Consortium                                                                                                                | Cordelia Langford; David K. Jackson; Dominic Kwiatkowski; Ewan Harrison; Health Services Laboratories and Alex Alderton; Ian Johnston; Jeffrey Barrett; John Sillitoe on behalf of the Wellcome Sanger Institute COVID-19 Surveillance Team; Roberto Amato; Sonia Goncalves |                                                                                                                                                                                                                                                                                                                                                                             |
| see above                                                                                                                                                                                                                                                                                                                                                                                                                                                                                                                                                                                                                                                                                                                                                                                                                                                                                                                                                                                                                                                                                                                                                                                                                                                                                                                                                                    | Health Services Laboratories                                                                       |                                                                                                                                                                                           |                                                                                                                                                                                                                                                                             |                                                                                                                                                                                                                                                                                                                                                                             |
| EPI_ISL_9719407                                                                                                                                                                                                                                                                                                                                                                                                                                                                                                                                                                                                                                                                                                                                                                                                                                                                                                                                                                                                                                                                                                                                                                                                                                                                                                                                                              | Hessisches Landesprüfungs- und Untersuchungsamt im Gesundheitswesen (HLPGU)                        |                                                                                                                                                                                           | Robert Koch Institute                                                                                                                                                                                                                                                       |                                                                                                                                                                                                                                                                                                                                                                             |
| EPI_ISL_9515439, EPI_ISL_9515441                                                                                                                                                                                                                                                                                                                                                                                                                                                                                                                                                                                                                                                                                                                                                                                                                                                                                                                                                                                                                                                                                                                                                                                                                                                                                                                                             | Hospital General Universitario Gregorio Marañón                                                    | Hospital General Universitario Gregorio Marañón                                                                                                                                           |                                                                                                                                                                                                                                                                             | Cristina Rodríguez-Grande; Dario García de Viedma; Jorge Rodríguez-Grande; Julia Suárez; Laura Pérez-Lago; Marta Herranz Martin; Patricia Muñoz; Pedro Sola Campoy; Pilar Catalán; Rosalía Palomino Cabrera; Sergio Buenestado Serrano                                                                                                                                      |
| EPI_ISL_9604414                                                                                                                                                                                                                                                                                                                                                                                                                                                                                                                                                                                                                                                                                                                                                                                                                                                                                                                                                                                                                                                                                                                                                                                                                                                                                                                                                              | Hospital Universitari Dr. Josep Trueta                                                             | Hospital d'Investigació Biomèdica de Girona   Hospital Universitari Dr. Josep Trueta                                                                                                      |                                                                                                                                                                                                                                                                             | Bernat del Olmo; Mel-lina Pinsach; Meritxell Deulofeu; Nuria Esther Neto; Paula Costa                                                                                                                                                                                                                                                                                       |
| EPI_ISL_9610040                                                                                                                                                                                                                                                                                                                                                                                                                                                                                                                                                                                                                                                                                                                                                                                                                                                                                                                                                                                                                                                                                                                                                                                                                                                                                                                                                              | Hospital Universitari Vall d'Hebron - Vall d'Hebron Institut de Recerca                            | Hospital Universitari Vall d'Hebron - Vall d'Hebron Institut de Recerca                                                                                                                   |                                                                                                                                                                                                                                                                             | Alejandra González-Sánchez; Andrés Antón; Ariadna Rando; Carla Castillo; Cristina Andrés; Damir Garcia-Cehic; Josep Quer; Juliana Esperalba; Karen García; Maria Carmen Martin; Maria Gema Codina; Maria Piñana; Rodrigo Vázquez; Tomás Pumarola                                                                                                                            |
| EPI_ISL_9495015                                                                                                                                                                                                                                                                                                                                                                                                                                                                                                                                                                                                                                                                                                                                                                                                                                                                                                                                                                                                                                                                                                                                                                                                                                                                                                                                                              | ICMR-National Institute of Virology - INSCAOG                                                      |                                                                                                                                                                                           | NIV Influenza                                                                                                                                                                                                                                                               | Dr. Varsha Potdar and NIC Team                                                                                                                                                                                                                                                                                                                                              |
| EPI_ISL_9747641, EPI_ISL_9747657                                                                                                                                                                                                                                                                                                                                                                                                                                                                                                                                                                                                                                                                                                                                                                                                                                                                                                                                                                                                                                                                                                                                                                                                                                                                                                                                             | IMD - Institut für Medizinische Diagnostik Berlin-Potsdam                                          |                                                                                                                                                                                           | Robert Koch Institute                                                                                                                                                                                                                                                       |                                                                                                                                                                                                                                                                                                                                                                             |
| EPI_ISL_9747607, EPI_ISL_9747614, EPI_ISL_9747616, EPI_ISL_9747632, EPI_ISL_9747653, EPI_ISL_9747655, EPI_ISL_9747844, EPI_ISL_9747858, EPI_ISL_9747867, EPI_ISL_9747878, EPI_ISL_9747889, EPI_ISL_9747914, EPI_ISL_9747927, EPI_ISL_9747942, EPI_ISL_9748176, EPI_ISL_9748255, EPI_ISL_9748271, EPI_ISL_9748279, EPI_ISL_9748283, EPI_ISL_9748293, EPI_ISL_9748296, EPI_ISL_9748309                                                                                                                                                                                                                                                                                                                                                                                                                                                                                                                                                                                                                                                                                                                                                                                                                                                                                                                                                                                         |                                                                                                    |                                                                                                                                                                                           |                                                                                                                                                                                                                                                                             |                                                                                                                                                                                                                                                                                                                                                                             |
| see above                                                                                                                                                                                                                                                                                                                                                                                                                                                                                                                                                                                                                                                                                                                                                                                                                                                                                                                                                                                                                                                                                                                                                                                                                                                                                                                                                                    | IMD - Labor Oderland                                                                               |                                                                                                                                                                                           | Robert Koch Institute                                                                                                                                                                                                                                                       |                                                                                                                                                                                                                                                                                                                                                                             |
| EPI_ISL_9748203, EPI_ISL_9748224                                                                                                                                                                                                                                                                                                                                                                                                                                                                                                                                                                                                                                                                                                                                                                                                                                                                                                                                                                                                                                                                                                                                                                                                                                                                                                                                             | IMD - MVZ Labor Greifswald                                                                         |                                                                                                                                                                                           | Robert Koch Institute                                                                                                                                                                                                                                                       |                                                                                                                                                                                                                                                                                                                                                                             |
| EPI_ISL_9742176, EPI_ISL_9742219, EPI_ISL_9742586, EPI_ISL_9742620, EPI_ISL_9742627, EPI_ISL_9742635, EPI_ISL_9742662, EPI_ISL_9742671, EPI_ISL_9742702                                                                                                                                                                                                                                                                                                                                                                                                                                                                                                                                                                                                                                                                                                                                                                                                                                                                                                                                                                                                                                                                                                                                                                                                                      |                                                                                                    |                                                                                                                                                                                           |                                                                                                                                                                                                                                                                             |                                                                                                                                                                                                                                                                                                                                                                             |
| see above                                                                                                                                                                                                                                                                                                                                                                                                                                                                                                                                                                                                                                                                                                                                                                                                                                                                                                                                                                                                                                                                                                                                                                                                                                                                                                                                                                    | IMD - MVZ Labor Martinsried                                                                        |                                                                                                                                                                                           | Robert Koch Institute                                                                                                                                                                                                                                                       |                                                                                                                                                                                                                                                                                                                                                                             |
| EPI_ISL_9747642                                                                                                                                                                                                                                                                                                                                                                                                                                                                                                                                                                                                                                                                                                                                                                                                                                                                                                                                                                                                                                                                                                                                                                                                                                                                                                                                                              | IMD - Medizinisches Labor Rostock                                                                  |                                                                                                                                                                                           | Robert Koch Institute                                                                                                                                                                                                                                                       |                                                                                                                                                                                                                                                                                                                                                                             |
| EPI_ISL_9718618, EPI_ISL_9741225, EPI_ISL_9741289                                                                                                                                                                                                                                                                                                                                                                                                                                                                                                                                                                                                                                                                                                                                                                                                                                                                                                                                                                                                                                                                                                                                                                                                                                                                                                                            | IMD Labor Frankfurt                                                                                |                                                                                                                                                                                           | Robert Koch Institute                                                                                                                                                                                                                                                       |                                                                                                                                                                                                                                                                                                                                                                             |
| EPI_ISL_9738904, EPI_ISL_9738905, EPI_ISL_9738910, EPI_ISL_9738912, EPI_ISL_9738913, EPI_ISL_9738914, EPI_ISL_9738922                                                                                                                                                                                                                                                                                                                                                                                                                                                                                                                                                                                                                                                                                                                                                                                                                                                                                                                                                                                                                                                                                                                                                                                                                                                        |                                                                                                    |                                                                                                                                                                                           |                                                                                                                                                                                                                                                                             |                                                                                                                                                                                                                                                                                                                                                                             |
| see above                                                                                                                                                                                                                                                                                                                                                                                                                                                                                                                                                                                                                                                                                                                                                                                                                                                                                                                                                                                                                                                                                                                                                                                                                                                                                                                                                                    | Indira Gandhi Memorial Hospital                                                                    | Indira Gandhi Memorial Hospital                                                                                                                                                           |                                                                                                                                                                                                                                                                             | D. Fathmah Nazla Rafeeq; Dr. Ibrahim Afzal; Mr. Ibrahim Nishan Ahmed; Ms. Aishath Shuhudha; Ms. Aminath Shaazleena Abdul Rahman; Ms. Soafy Mohamed                                                                                                                                                                                                                          |
| EPI_ISL_9623285, EPI_ISL_9623287, EPI_ISL_9623379, EPI_ISL_9623381, EPI_ISL_9623729, EPI_ISL_9623736, EPI_ISL_9623737, EPI_ISL_9667159                                                                                                                                                                                                                                                                                                                                                                                                                                                                                                                                                                                                                                                                                                                                                                                                                                                                                                                                                                                                                                                                                                                                                                                                                                       |                                                                                                    |                                                                                                                                                                                           |                                                                                                                                                                                                                                                                             |                                                                                                                                                                                                                                                                                                                                                                             |
| see above                                                                                                                                                                                                                                                                                                                                                                                                                                                                                                                                                                                                                                                                                                                                                                                                                                                                                                                                                                                                                                                                                                                                                                                                                                                                                                                                                                    | Infinity Biologix                                                                                  | Centers for Disease Control and Prevention Division of Viral Diseases, Pathogen Discovery                                                                                                 |                                                                                                                                                                                                                                                                             | Benjamin Rambo-Martin; Chirayu Goswami; Christian Bixby; Christopher Gulvick; Clinton Paden; Dakota Howard; Dhwanj Batra; Duncan MacCannell; Erisa Sula; Jason Caravas; Jonathan Schultz; Kristine Lacey; Matthew Schmeer; Peter Cook; Robin Grimwood; Russ Hager; Scott Sammons; Shatavia Morrison; Tymeckia Kendall; Victoria Caban Figueroa; Yihé Wang; Yvette Unoarumhi |
| EPI_ISL_9446551, EPI_ISL_9446567, EPI_ISL_9446568                                                                                                                                                                                                                                                                                                                                                                                                                                                                                                                                                                                                                                                                                                                                                                                                                                                                                                                                                                                                                                                                                                                                                                                                                                                                                                                            | Institut für Klinische Transfusionsmedizin und Immungenetik DRK Blutspendedienst Baden-Württemberg |                                                                                                                                                                                           | Robert Koch Institute                                                                                                                                                                                                                                                       |                                                                                                                                                                                                                                                                                                                                                                             |
| EPI_ISL_9246230, EPI_ISL_9423970, EPI_ISL_9426024, EPI_ISL_9426075, EPI_ISL_9599373, EPI_ISL_9599715                                                                                                                                                                                                                                                                                                                                                                                                                                                                                                                                                                                                                                                                                                                                                                                                                                                                                                                                                                                                                                                                                                                                                                                                                                                                         | Institute for Infectious Diseases                                                                  | Institute for Infectious Diseases, University of Bern                                                                                                                                     |                                                                                                                                                                                                                                                                             | Alban Ramette; Christian Baumann; Cora Sägesser; Franziska Suter-Riniker; Loïc Borcard; Miguel A Terrazos Miani; Nicole Liechti; Pascal Bittel; Peter Keller; Sonja Gempeler; Stefan Neuenschwander; Stephen L Leib                                                                                                                                                         |
| EPI_ISL_9324155                                                                                                                                                                                                                                                                                                                                                                                                                                                                                                                                                                                                                                                                                                                                                                                                                                                                                                                                                                                                                                                                                                                                                                                                                                                                                                                                                              | Institute of Virology, Medical Center, University of Freiburg, Freiburg, Germany                   | Institute of Virology, Clinal Virus Genomics, Medical Center, University of Freiburg, Freiburg, Germany                                                                                   |                                                                                                                                                                                                                                                                             | Jonas Fuchs; Lena Jaki; Lisa Gutbrod; Marcus Panning                                                                                                                                                                                                                                                                                                                        |
| EPI_ISL_9292369, EPI_ISL_9306778, EPI_ISL_9309288, EPI_ISL_9309748, EPI_ISL_9309847, EPI_ISL_9309894, EPI_ISL_9309959, EPI_ISL_9314015, EPI_ISL_9317306, EPI_ISL_9357096, EPI_ISL_9363919, EPI_ISL_9363950, EPI_ISL_9364317, EPI_ISL_9367855, EPI_ISL_9368080, EPI_ISL_9440535, EPI_ISL_9442211, EPI_ISL_9442933                                                                                                                                                                                                                                                                                                                                                                                                                                                                                                                                                                                                                                                                                                                                                                                                                                                                                                                                                                                                                                                             |                                                                                                    |                                                                                                                                                                                           |                                                                                                                                                                                                                                                                             |                                                                                                                                                                                                                                                                                                                                                                             |
| see above                                                                                                                                                                                                                                                                                                                                                                                                                                                                                                                                                                                                                                                                                                                                                                                                                                                                                                                                                                                                                                                                                                                                                                                                                                                                                                                                                                    | Integrated Covid Hub North East                                                                    | Wellcome Sanger Institute for the COVID-19 Genomics UK (COG-UK) Consortium                                                                                                                |                                                                                                                                                                                                                                                                             | Cordelia Langford; David K. Jackson; Dominic Kwiatkowski; Ewan Harrison; Ian Johnston; Integrated Covid Hub North East and Alex Alderton; Jeffrey Barrett; John Sillitoe on behalf of the Wellcome Sanger Institute COVID-19 Surveillance Team; Roberto Amato; Sonia Goncalves                                                                                              |
| EPI_ISL_9729794                                                                                                                                                                                                                                                                                                                                                                                                                                                                                                                                                                                                                                                                                                                                                                                                                                                                                                                                                                                                                                                                                                                                                                                                                                                                                                                                                              | KRH Klinikum Region Hannover: Institut für Med. Mikrobiologie und Krankenhaushygiene               |                                                                                                                                                                                           | Robert Koch Institute                                                                                                                                                                                                                                                       |                                                                                                                                                                                                                                                                                                                                                                             |
| EPI_ISL_9627703                                                                                                                                                                                                                                                                                                                                                                                                                                                                                                                                                                                                                                                                                                                                                                                                                                                                                                                                                                                                                                                                                                                                                                                                                                                                                                                                                              | Kansas Health and Environmental Lab                                                                | Kansas Health and Environmental Lab                                                                                                                                                       |                                                                                                                                                                                                                                                                             | Amanda Bradley; Carrie Welch; Gary Burrus; Jonathan Barnell; Mike Grose; Victor Anderson; and Phil Adam                                                                                                                                                                                                                                                                     |
| EPI_ISL_9523392, EPI_ISL_9523400, EPI_ISL_9523403, EPI_ISL_9523404, EPI_ISL_9523422, EPI_ISL_9523429, EPI_ISL_9523431, EPI_ISL_9523433, EPI_ISL_9523440, EPI_ISL_9523441, EPI_ISL_9523445, EPI_ISL_9523456, EPI_ISL_9523461, EPI_ISL_9523469, EPI_ISL_9523470, EPI_ISL_9523471, EPI_ISL_9523473, EPI_ISL_9523475, EPI_ISL_9523483, EPI_ISL_9523489, EPI_ISL_9523496, EPI_ISL_9523508, EPI_ISL_9523509, EPI_ISL_9523511, EPI_ISL_9523512, EPI_ISL_9523513, EPI_ISL_9523707, EPI_ISL_9523709, EPI_ISL_9523711, EPI_ISL_9523715, EPI_ISL_9523716, EPI_ISL_9523718, EPI_ISL_9523721, EPI_ISL_9523730, EPI_ISL_9523745, EPI_ISL_9523748, EPI_ISL_9523752, EPI_ISL_9523754, EPI_ISL_9523758, EPI_ISL_9523760, EPI_ISL_9523768, EPI_ISL_9523773, EPI_ISL_9523793, EPI_ISL_9523797, EPI_ISL_9523806, EPI_ISL_9523811, EPI_ISL_9523813, EPI_ISL_9523814, EPI_ISL_9523824, EPI_ISL_9523831, EPI_ISL_9523836, EPI_ISL_9523841, EPI_ISL_9523857, EPI_ISL_9523859, EPI_ISL_9523867, EPI_ISL_9523872, EPI_ISL_9523880, EPI_ISL_9523882, EPI_ISL_9523896, EPI_ISL_9523901, EPI_ISL_9523903, EPI_ISL_9523913, EPI_ISL_9523916, EPI_ISL_9523920, EPI_ISL_9523921, EPI_ISL_9523928, EPI_ISL_9523933, EPI_ISL_9523936, EPI_ISL_9523945, EPI_ISL_9523948, EPI_ISL_9523950, EPI_ISL_9523953, EPI_ISL_9523956, EPI_ISL_9523960, EPI_ISL_9523969, EPI_ISL_9523971, EPI_ISL_9523973, EPI_ISL_9622933 |                                                                                                    |                                                                                                                                                                                           |                                                                                                                                                                                                                                                                             |                                                                                                                                                                                                                                                                                                                                                                             |
| see above                                                                                                                                                                                                                                                                                                                                                                                                                                                                                                                                                                                                                                                                                                                                                                                                                                                                                                                                                                                                                                                                                                                                                                                                                                                                                                                                                                    | Karolinska University Hospital Huddinge                                                            | Karolinska University Hospital                                                                                                                                                            |                                                                                                                                                                                                                                                                             | Annika Tiveljung Lindell; Henning Onsrbing; Jan Albert; Karina Henrich; Lynda Eneh; Maria Ropat; Martin Ekman; Natalija Gerasimcik; Robert Dyrdak; Sandra Broddesson; Shambhu Ganeshappa Aralaguppe; Tanja Normark; Tobias Allander; Valtteri Wirta; Zhibing Yun                                                                                                            |
| EPI_ISL_9523535, EPI_ISL_9523541, EPI_ISL_9523549, EPI_ISL_9523573, EPI_ISL_9523582, EPI_ISL_9523587, EPI_ISL_9523596, EPI_ISL_9523597, EPI_ISL_9523603, EPI_ISL_9523606, EPI_ISL_9523610, EPI_ISL_9523616, EPI_ISL_9523618, EPI_ISL_9523619, EPI_ISL_9523623, EPI_ISL_9523628, EPI_ISL_9523633, EPI_ISL_9523634, EPI_ISL_9523640, EPI_ISL_9523642, EPI_ISL_9523643, EPI_ISL_9523644, EPI_ISL_9622515, EPI_ISL_9622519, EPI_ISL_9622529, EPI_ISL_9622567, EPI_ISL_9622572, EPI_ISL_9622586, EPI_ISL_9622601, EPI_ISL_9622602, EPI_ISL_9622610, EPI_ISL_9622612, EPI_ISL_9622615, EPI_ISL_9622631, EPI_ISL_9622658, EPI_ISL_9622660, EPI_ISL_9622661, EPI_ISL_9622666, EPI_ISL_9622671, EPI_ISL_9622702, EPI_ISL_9622720, EPI_ISL_9622748, EPI_ISL_9622749, EPI_ISL_9622754, EPI_ISL_9622755, EPI_ISL_9622759, EPI_ISL_9622760, EPI_ISL_9622763, EPI_ISL_9622769, EPI_ISL_9622786, EPI_ISL_9622789, EPI_ISL_9622797, EPI_ISL_9622810, EPI_ISL_9623002, EPI_ISL_9623049, EPI_ISL_9623069                                                                                                                                                                                                                                                                                                                                                                                       |                                                                                                    |                                                                                                                                                                                           |                                                                                                                                                                                                                                                                             | Annika Tiveljung Lindell; Henning Onsrbing; Jan Albert; Karina Henrich; Lynda Eneh; Maria Ropat; Martin Ekman; Natalija Gerasimcik; Robert Dyrdak; Sandra Broddesson; Shambhu Ganeshappa Aralaguppe; Tanja Normark; Tobias Allander; Valtteri Wirta; Zhibing Yun                                                                                                            |
| see above                                                                                                                                                                                                                                                                                                                                                                                                                                                                                                                                                                                                                                                                                                                                                                                                                                                                                                                                                                                                                                                                                                                                                                                                                                                                                                                                                                    | Karolinska University Hospital Solna                                                               | Karolinska University Hospital                                                                                                                                                            |                                                                                                                                                                                                                                                                             | Annika Tiveljung Lindell; Henning Onsrbing; Jan Albert; Karina Henrich; Lynda Eneh; Maria Ropat; Martin Ekman; Natalija Gerasimcik; Robert Dyrdak; Sandra Broddesson; Shambhu Ganeshappa Aralaguppe; Tanja Normark; Tobias Allander; Valtteri Wirta; Zhibing Yun                                                                                                            |
| EPI_ISL_9718688                                                                                                                                                                                                                                                                                                                                                                                                                                                                                                                                                                                                                                                                                                                                                                                                                                                                                                                                                                                                                                                                                                                                                                                                                                                                                                                                                              | Kerckhoff-Klinik GmbH                                                                              |                                                                                                                                                                                           | Robert Koch Institute                                                                                                                                                                                                                                                       |                                                                                                                                                                                                                                                                                                                                                                             |
| EPI_ISL_9739256, EPI_ISL_9739264, EPI_ISL_9739265, EPI_ISL_9742412                                                                                                                                                                                                                                                                                                                                                                                                                                                                                                                                                                                                                                                                                                                                                                                                                                                                                                                                                                                                                                                                                                                                                                                                                                                                                                           | Klinika za infektivne bolesti "Dr. Fran Mihaljević"                                                | Hrvatski zavod za javno zdravstvo                                                                                                                                                         |                                                                                                                                                                                                                                                                             | Anita Jurić; Dragan Jurić; Irena Tabain; Ivana Ferenčak; Josipa Kuzle                                                                                                                                                                                                                                                                                                       |
| EPI_ISL_9607207                                                                                                                                                                                                                                                                                                                                                                                                                                                                                                                                                                                                                                                                                                                                                                                                                                                                                                                                                                                                                                                                                                                                                                                                                                                                                                                                                              | LABM SAINT BENOIT                                                                                  | Laboratoire de virologie, CNR arbovirus Associé, Chu de la Réunion                                                                                                                        |                                                                                                                                                                                                                                                                             | Anne-Julie Gourdé; Etienne Frumence; Marie-Christine Jaffar Bandjee; Nicolas M'nemosyme; Nicolas Traversier; Rubens Lhonneur                                                                                                                                                                                                                                                |
| EPI_ISL_9797857                                                                                                                                                                                                                                                                                                                                                                                                                                                                                                                                                                                                                                                                                                                                                                                                                                                                                                                                                                                                                                                                                                                                                                                                                                                                                                                                                              | LABO BIOSEVRES THOUARS                                                                             | CNR Virus des Infections Respiratoires - France SUD                                                                                                                                       |                                                                                                                                                                                                                                                                             | Antonin Bal; Bruno Lina; Bruno Simon; Gregory Destras; Gwendolyne Burfin; Hadrien Regue; Laurence Jossot; Martine Valette; Quentin Semanas; Theophile Boyer                                                                                                                                                                                                                 |
| EPI_ISL_9797825, EPI_ISL_9797826, EPI_ISL_9797831, EPI_ISL_9797832, EPI_ISL_9797837                                                                                                                                                                                                                                                                                                                                                                                                                                                                                                                                                                                                                                                                                                                                                                                                                                                                                                                                                                                                                                                                                                                                                                                                                                                                                          | LABOFFICE                                                                                          | CNR Virus des Infections Respiratoires - France SUD                                                                                                                                       |                                                                                                                                                                                                                                                                             | Antonin Bal; Bruno Lina; Bruno Simon; Gregory Destras; Gwendolyne Burfin; Hadrien Regue; Laurence Jossot; Martine Valette; Quentin Semanas; Theophile Boyer                                                                                                                                                                                                                 |
| EPI_ISL_9798215, EPI_ISL_9798217, EPI_ISL_9798232, EPI_ISL_9798250                                                                                                                                                                                                                                                                                                                                                                                                                                                                                                                                                                                                                                                                                                                                                                                                                                                                                                                                                                                                                                                                                                                                                                                                                                                                                                           | LABORATOIRE CREAVALLEE                                                                             | CNR Virus des Infections Respiratoires - France SUD                                                                                                                                       |                                                                                                                                                                                                                                                                             | Antonin Bal; Bruno Lina; Bruno Simon; Gregory Destras; Gwendolyne Burfin; Hadrien Regue; Laurence Jossot; Martine Valette; Quentin Semanas; Theophile Boyer                                                                                                                                                                                                                 |
| EPI_ISL_9713208, EPI_ISL_9713231, EPI_ISL_9713239, EPI_ISL_9713248                                                                                                                                                                                                                                                                                                                                                                                                                                                                                                                                                                                                                                                                                                                                                                                                                                                                                                                                                                                                                                                                                                                                                                                                                                                                                                           | LABORATORIUM BADAŃ KLINICZNYCH WSSE w OPOLU                                                        | 1. Academic Center for Pathomorphological and Genetic-Molecular Diagnostics Ltd, Białystok, Poland 2. National Institute of Public Health - National Institute of Hygiene, Warsaw, Poland |                                                                                                                                                                                                                                                                             | Anetta Sulewska; Jacek Nikliński; Janusz Dzieciół; Joanna Kiółka; Katarzyna Zacharczuk; Konrad Raczkowski; Magdalena Nowakowska; Małgorzata Sadkowska-Todyś; Piotr Karabowicz; Piotr Majewski; Przemysław Biecek; Joanna Reszeć; Radosław Charkiewicz; Tomasz Wolkowicz                                                                                                     |
| EPI_ISL_9743196, EPI_ISL_9743205, EPI_ISL_9743220, EPI_ISL_9743279, EPI_ISL_9743326, EPI_ISL_9743339, EPI_ISL_9743354, EPI_ISL_9743595, EPI_ISL_9743622, EPI_ISL_9743637, EPI_ISL_9743805, EPI_ISL_9743873, EPI_ISL_9743880, EPI_ISL_9743975, EPI_ISL_9743981, EPI_ISL_9743993, EPI_ISL_9744006, EPI_ISL_9744015, EPI_ISL_9744017, EPI_ISL_9744041, EPI_ISL_9744044, EPI_ISL_9744106, EPI_ISL_9744124, EPI_ISL_9744149, EPI_ISL_9744192, EPI_ISL_9744207, EPI_ISL_9744381, EPI_ISL_9744387, EPI_ISL_9744394, EPI_ISL_9744431, EPI_ISL_9744435                                                                                                                                                                                                                                                                                                                                                                                                                                                                                                                                                                                                                                                                                                                                                                                                                                |                                                                                                    |                                                                                                                                                                                           |                                                                                                                                                                                                                                                                             |                                                                                                                                                                                                                                                                                                                                                                             |
| see above                                                                                                                                                                                                                                                                                                                                                                                                                                                                                                                                                                                                                                                                                                                                                                                                                                                                                                                                                                                                                                                                                                                                                                                                                                                                                                                                                                    | LADR Zentrallabor DR. Kramer & Kollegen Geesthacht                                                 |                                                                                                                                                                                           | Robert Koch Institute                                                                                                                                                                                                                                                       |                                                                                                                                                                                                                                                                                                                                                                             |
| EPI_ISL_9603309, EPI_ISL_9603459                                                                                                                                                                                                                                                                                                                                                                                                                                                                                                                                                                                                                                                                                                                                                                                                                                                                                                                                                                                                                                                                                                                                                                                                                                                                                                                                             | LAM BIO 86 SITE DE CHAUMONT                                                                        | CNR Virus des Infections Respiratoires - France SUD                                                                                                                                       |                                                                                                                                                                                                                                                                             | Antonin Bal; Bruno Lina; Bruno Simon; Gregory Destras; Gwendolyne Burfin; Hadrien Regue; Laurence Jossot; Martine Valette; Quentin Semanas; Theophile Boyer                                                                                                                                                                                                                 |
| EPI_ISL_9795979, EPI_ISL_9795980, EPI_ISL_9795985                                                                                                                                                                                                                                                                                                                                                                                                                                                                                                                                                                                                                                                                                                                                                                                                                                                                                                                                                                                                                                                                                                                                                                                                                                                                                                                            | LAM BIPOLE ORTHEZ                                                                                  | CNR Virus des Infections Respiratoires - France SUD                                                                                                                                       |                                                                                                                                                                                                                                                                             | Antonin Bal; Bruno Lina; Bruno Simon; Gregory Destras; Gwendolyne Burfin; Hadrien Regue; Laurence Jossot; Martine Valette; Quentin Semanas; Theophile Boyer                                                                                                                                                                                                                 |



|                                                                                                                                                                                                                                                                                                                                                                                                                                                                                                                                                                                                                                                                                                                                                                                                                                                                                                                                                                                                                                                                                                                                                                                                                                                                                                                                                                                                                                                                                                                                                                                                                                                                                                                                                                                                                                                                                                                                                                                                                                                                                                                                                                                                                                                                                                                                                                                                                                                                                                                                                                                                                                                                                                                                                                                                                                                                                                                                                                                                                                                                                                                                                                                                                                                                                                                                                                                                                                                                                                                                                                                                                                                                                                                                                                                                                                                                                                                                                                                                                                                                                                                                                                                                                                                                                                                                                                                                                                                                                                                                                                                                                                                                                                                                                                                                                                                                                                                                                                                                                                                                                                                                                                                                                                                                                                                                                                                                                                                                                                                                                                                                                                                                                                                                                                                                                                                                                                                                                                                                                                                                                                                                                                                                                                                                                                                                                                                                                                                                                                                                                                                                                                                                                                                                                                                                                                                                                                                                                                                                                                                                                                                                                                                                                                                                                                                                                                                                                                                                                                                                                                                                                                                                                                                                                                                                                                                                                                                                                                                                                                                                                                                                                                                                                                                                                                                                                                                                                                                                                                                                                                                                                                                                                                                                                                                                                                                                                                                                                                                                                                                                                                                                                                                                                                                                                                                                                                                                                                                                                                                                                                                |                                                                                                                        |                                                                                                                                                                                                                                                                                                                                 |  |                                                                                                                                                                                                                                                                                                                                                                                                                                                                                                                                                                                                                                                                                                                                                                                                                              |
|--------------------------------------------------------------------------------------------------------------------------------------------------------------------------------------------------------------------------------------------------------------------------------------------------------------------------------------------------------------------------------------------------------------------------------------------------------------------------------------------------------------------------------------------------------------------------------------------------------------------------------------------------------------------------------------------------------------------------------------------------------------------------------------------------------------------------------------------------------------------------------------------------------------------------------------------------------------------------------------------------------------------------------------------------------------------------------------------------------------------------------------------------------------------------------------------------------------------------------------------------------------------------------------------------------------------------------------------------------------------------------------------------------------------------------------------------------------------------------------------------------------------------------------------------------------------------------------------------------------------------------------------------------------------------------------------------------------------------------------------------------------------------------------------------------------------------------------------------------------------------------------------------------------------------------------------------------------------------------------------------------------------------------------------------------------------------------------------------------------------------------------------------------------------------------------------------------------------------------------------------------------------------------------------------------------------------------------------------------------------------------------------------------------------------------------------------------------------------------------------------------------------------------------------------------------------------------------------------------------------------------------------------------------------------------------------------------------------------------------------------------------------------------------------------------------------------------------------------------------------------------------------------------------------------------------------------------------------------------------------------------------------------------------------------------------------------------------------------------------------------------------------------------------------------------------------------------------------------------------------------------------------------------------------------------------------------------------------------------------------------------------------------------------------------------------------------------------------------------------------------------------------------------------------------------------------------------------------------------------------------------------------------------------------------------------------------------------------------------------------------------------------------------------------------------------------------------------------------------------------------------------------------------------------------------------------------------------------------------------------------------------------------------------------------------------------------------------------------------------------------------------------------------------------------------------------------------------------------------------------------------------------------------------------------------------------------------------------------------------------------------------------------------------------------------------------------------------------------------------------------------------------------------------------------------------------------------------------------------------------------------------------------------------------------------------------------------------------------------------------------------------------------------------------------------------------------------------------------------------------------------------------------------------------------------------------------------------------------------------------------------------------------------------------------------------------------------------------------------------------------------------------------------------------------------------------------------------------------------------------------------------------------------------------------------------------------------------------------------------------------------------------------------------------------------------------------------------------------------------------------------------------------------------------------------------------------------------------------------------------------------------------------------------------------------------------------------------------------------------------------------------------------------------------------------------------------------------------------------------------------------------------------------------------------------------------------------------------------------------------------------------------------------------------------------------------------------------------------------------------------------------------------------------------------------------------------------------------------------------------------------------------------------------------------------------------------------------------------------------------------------------------------------------------------------------------------------------------------------------------------------------------------------------------------------------------------------------------------------------------------------------------------------------------------------------------------------------------------------------------------------------------------------------------------------------------------------------------------------------------------------------------------------------------------------------------------------------------------------------------------------------------------------------------------------------------------------------------------------------------------------------------------------------------------------------------------------------------------------------------------------------------------------------------------------------------------------------------------------------------------------------------------------------------------------------------------------------------------------------------------------------------------------------------------------------------------------------------------------------------------------------------------------------------------------------------------------------------------------------------------------------------------------------------------------------------------------------------------------------------------------------------------------------------------------------------------------------------------------------------------------------------------------------------------------------------------------------------------------------------------------------------------------------------------------------------------------------------------------------------------------------------------------------------------------------------------------------------------------------------------------------------------------------------------------------------------------------------------------------------------------------------------------------------------------------------------------------------------------------------------------------------------------------------------------------------------------------------------------------------------------------------------------------------------------------------------------------------------------------------------------------------------------------------------------------------------------------------------------------------------------------------------------------------------------------------------------------------------------------------------------------------------------------------------------------------------------------------------------------------------------------------------------------------------------------------------------------------------------------------------------------------------------------------------------------------------------------------------------------------------------------------------------------------------------------------------------|------------------------------------------------------------------------------------------------------------------------|---------------------------------------------------------------------------------------------------------------------------------------------------------------------------------------------------------------------------------------------------------------------------------------------------------------------------------|--|------------------------------------------------------------------------------------------------------------------------------------------------------------------------------------------------------------------------------------------------------------------------------------------------------------------------------------------------------------------------------------------------------------------------------------------------------------------------------------------------------------------------------------------------------------------------------------------------------------------------------------------------------------------------------------------------------------------------------------------------------------------------------------------------------------------------------|
| EPI_ISL_9795989                                                                                                                                                                                                                                                                                                                                                                                                                                                                                                                                                                                                                                                                                                                                                                                                                                                                                                                                                                                                                                                                                                                                                                                                                                                                                                                                                                                                                                                                                                                                                                                                                                                                                                                                                                                                                                                                                                                                                                                                                                                                                                                                                                                                                                                                                                                                                                                                                                                                                                                                                                                                                                                                                                                                                                                                                                                                                                                                                                                                                                                                                                                                                                                                                                                                                                                                                                                                                                                                                                                                                                                                                                                                                                                                                                                                                                                                                                                                                                                                                                                                                                                                                                                                                                                                                                                                                                                                                                                                                                                                                                                                                                                                                                                                                                                                                                                                                                                                                                                                                                                                                                                                                                                                                                                                                                                                                                                                                                                                                                                                                                                                                                                                                                                                                                                                                                                                                                                                                                                                                                                                                                                                                                                                                                                                                                                                                                                                                                                                                                                                                                                                                                                                                                                                                                                                                                                                                                                                                                                                                                                                                                                                                                                                                                                                                                                                                                                                                                                                                                                                                                                                                                                                                                                                                                                                                                                                                                                                                                                                                                                                                                                                                                                                                                                                                                                                                                                                                                                                                                                                                                                                                                                                                                                                                                                                                                                                                                                                                                                                                                                                                                                                                                                                                                                                                                                                                                                                                                                                                                                                                                |                                                                                                                        |                                                                                                                                                                                                                                                                                                                                 |  |                                                                                                                                                                                                                                                                                                                                                                                                                                                                                                                                                                                                                                                                                                                                                                                                                              |
| EPI_ISL_9679614,<br>EPI_ISL_9679615,<br>EPI_ISL_9679617,<br>EPI_ISL_9679618,<br>EPI_ISL_9679620,<br>EPI_ISL_9679624                                                                                                                                                                                                                                                                                                                                                                                                                                                                                                                                                                                                                                                                                                                                                                                                                                                                                                                                                                                                                                                                                                                                                                                                                                                                                                                                                                                                                                                                                                                                                                                                                                                                                                                                                                                                                                                                                                                                                                                                                                                                                                                                                                                                                                                                                                                                                                                                                                                                                                                                                                                                                                                                                                                                                                                                                                                                                                                                                                                                                                                                                                                                                                                                                                                                                                                                                                                                                                                                                                                                                                                                                                                                                                                                                                                                                                                                                                                                                                                                                                                                                                                                                                                                                                                                                                                                                                                                                                                                                                                                                                                                                                                                                                                                                                                                                                                                                                                                                                                                                                                                                                                                                                                                                                                                                                                                                                                                                                                                                                                                                                                                                                                                                                                                                                                                                                                                                                                                                                                                                                                                                                                                                                                                                                                                                                                                                                                                                                                                                                                                                                                                                                                                                                                                                                                                                                                                                                                                                                                                                                                                                                                                                                                                                                                                                                                                                                                                                                                                                                                                                                                                                                                                                                                                                                                                                                                                                                                                                                                                                                                                                                                                                                                                                                                                                                                                                                                                                                                                                                                                                                                                                                                                                                                                                                                                                                                                                                                                                                                                                                                                                                                                                                                                                                                                                                                                                                                                                                                            | LANCET                                                                                                                 | National Institute for Communicable Diseases of the National Health Laboratory Service                                                                                                                                                                                                                                          |  | Amoako DG; Bhiman JN; Everatt J; Ismail A; Kekana D; Mahlangu B; Mnguni A; Mohale T; Ntuli N; Scheepers C; Wolter N                                                                                                                                                                                                                                                                                                                                                                                                                                                                                                                                                                                                                                                                                                          |
| EPI_ISL_9672937                                                                                                                                                                                                                                                                                                                                                                                                                                                                                                                                                                                                                                                                                                                                                                                                                                                                                                                                                                                                                                                                                                                                                                                                                                                                                                                                                                                                                                                                                                                                                                                                                                                                                                                                                                                                                                                                                                                                                                                                                                                                                                                                                                                                                                                                                                                                                                                                                                                                                                                                                                                                                                                                                                                                                                                                                                                                                                                                                                                                                                                                                                                                                                                                                                                                                                                                                                                                                                                                                                                                                                                                                                                                                                                                                                                                                                                                                                                                                                                                                                                                                                                                                                                                                                                                                                                                                                                                                                                                                                                                                                                                                                                                                                                                                                                                                                                                                                                                                                                                                                                                                                                                                                                                                                                                                                                                                                                                                                                                                                                                                                                                                                                                                                                                                                                                                                                                                                                                                                                                                                                                                                                                                                                                                                                                                                                                                                                                                                                                                                                                                                                                                                                                                                                                                                                                                                                                                                                                                                                                                                                                                                                                                                                                                                                                                                                                                                                                                                                                                                                                                                                                                                                                                                                                                                                                                                                                                                                                                                                                                                                                                                                                                                                                                                                                                                                                                                                                                                                                                                                                                                                                                                                                                                                                                                                                                                                                                                                                                                                                                                                                                                                                                                                                                                                                                                                                                                                                                                                                                                                                                                | LATE - Laboratório de Técnicas Especiais - Hospital Israelita Albert Einstein                                          | LATE - Laboratório de Técnicas Especiais - Hospital Israelita Albert Einstein                                                                                                                                                                                                                                                   |  | Alexandre Hideaki Takara; Ana Paula Moreira Salles; Anelise da Silva Santos; Deyvid Amgarten; Erick Gustavo Dorlasi; Fernando de Mello Malta; João Renato Rebelo Pinho; Luiz Vicente Rizzo; Marcio Anunciacao Menezes; Pedro Henrique Sebe Rodrigues; Raquel Riyuzo                                                                                                                                                                                                                                                                                                                                                                                                                                                                                                                                                          |
| EPI_ISL_9797872<br>EPI_ISL_9795966,<br>EPI_ISL_9795970                                                                                                                                                                                                                                                                                                                                                                                                                                                                                                                                                                                                                                                                                                                                                                                                                                                                                                                                                                                                                                                                                                                                                                                                                                                                                                                                                                                                                                                                                                                                                                                                                                                                                                                                                                                                                                                                                                                                                                                                                                                                                                                                                                                                                                                                                                                                                                                                                                                                                                                                                                                                                                                                                                                                                                                                                                                                                                                                                                                                                                                                                                                                                                                                                                                                                                                                                                                                                                                                                                                                                                                                                                                                                                                                                                                                                                                                                                                                                                                                                                                                                                                                                                                                                                                                                                                                                                                                                                                                                                                                                                                                                                                                                                                                                                                                                                                                                                                                                                                                                                                                                                                                                                                                                                                                                                                                                                                                                                                                                                                                                                                                                                                                                                                                                                                                                                                                                                                                                                                                                                                                                                                                                                                                                                                                                                                                                                                                                                                                                                                                                                                                                                                                                                                                                                                                                                                                                                                                                                                                                                                                                                                                                                                                                                                                                                                                                                                                                                                                                                                                                                                                                                                                                                                                                                                                                                                                                                                                                                                                                                                                                                                                                                                                                                                                                                                                                                                                                                                                                                                                                                                                                                                                                                                                                                                                                                                                                                                                                                                                                                                                                                                                                                                                                                                                                                                                                                                                                                                                                                                         | LBM DYNABIO CARREAU<br>LBM OLIVOT - MARIOTTI                                                                           | CNR Virus des Infections Respiratoires - France SUD<br>CNR Virus des Infections Respiratoires - France SUD                                                                                                                                                                                                                      |  | Antonin Bal; Bruno Lina; Bruno Simon; Gregory Destras; Gwendolyne Burfin; Hadrien Regue; Laurence Jossed; Martine Valette; Quentin Semanas; Theophile Boyer<br>Antonin Bal; Bruno Lina; Bruno Simon; Gregory Destras; Gwendolyne Burfin; Hadrien Regue; Laurence Jossed; Martine Valette; Quentin Semanas; Theophile Boyer                                                                                                                                                                                                                                                                                                                                                                                                                                                                                                   |
| EPI_ISL_9353804<br>EPI_ISL_9798363,<br>EPI_ISL_9798365,<br>EPI_ISL_9798367,<br>EPI_ISL_9798376                                                                                                                                                                                                                                                                                                                                                                                                                                                                                                                                                                                                                                                                                                                                                                                                                                                                                                                                                                                                                                                                                                                                                                                                                                                                                                                                                                                                                                                                                                                                                                                                                                                                                                                                                                                                                                                                                                                                                                                                                                                                                                                                                                                                                                                                                                                                                                                                                                                                                                                                                                                                                                                                                                                                                                                                                                                                                                                                                                                                                                                                                                                                                                                                                                                                                                                                                                                                                                                                                                                                                                                                                                                                                                                                                                                                                                                                                                                                                                                                                                                                                                                                                                                                                                                                                                                                                                                                                                                                                                                                                                                                                                                                                                                                                                                                                                                                                                                                                                                                                                                                                                                                                                                                                                                                                                                                                                                                                                                                                                                                                                                                                                                                                                                                                                                                                                                                                                                                                                                                                                                                                                                                                                                                                                                                                                                                                                                                                                                                                                                                                                                                                                                                                                                                                                                                                                                                                                                                                                                                                                                                                                                                                                                                                                                                                                                                                                                                                                                                                                                                                                                                                                                                                                                                                                                                                                                                                                                                                                                                                                                                                                                                                                                                                                                                                                                                                                                                                                                                                                                                                                                                                                                                                                                                                                                                                                                                                                                                                                                                                                                                                                                                                                                                                                                                                                                                                                                                                                                                                 | LKO<br>LX BIO                                                                                                          | Jessa<br>CNR Virus des Infections Respiratoires - France SUD                                                                                                                                                                                                                                                                    |  | Severine Berden et al. on behalf of the Jessa_cmdLab<br>Antonin Bal; Bruno Lina; Bruno Simon; Gregory Destras; Gwendolyne Burfin; Hadrien Regue; Laurence Jossed; Martine Valette; Quentin Semanas; Theophile Boyer                                                                                                                                                                                                                                                                                                                                                                                                                                                                                                                                                                                                          |
| EPI_ISL_9640443                                                                                                                                                                                                                                                                                                                                                                                                                                                                                                                                                                                                                                                                                                                                                                                                                                                                                                                                                                                                                                                                                                                                                                                                                                                                                                                                                                                                                                                                                                                                                                                                                                                                                                                                                                                                                                                                                                                                                                                                                                                                                                                                                                                                                                                                                                                                                                                                                                                                                                                                                                                                                                                                                                                                                                                                                                                                                                                                                                                                                                                                                                                                                                                                                                                                                                                                                                                                                                                                                                                                                                                                                                                                                                                                                                                                                                                                                                                                                                                                                                                                                                                                                                                                                                                                                                                                                                                                                                                                                                                                                                                                                                                                                                                                                                                                                                                                                                                                                                                                                                                                                                                                                                                                                                                                                                                                                                                                                                                                                                                                                                                                                                                                                                                                                                                                                                                                                                                                                                                                                                                                                                                                                                                                                                                                                                                                                                                                                                                                                                                                                                                                                                                                                                                                                                                                                                                                                                                                                                                                                                                                                                                                                                                                                                                                                                                                                                                                                                                                                                                                                                                                                                                                                                                                                                                                                                                                                                                                                                                                                                                                                                                                                                                                                                                                                                                                                                                                                                                                                                                                                                                                                                                                                                                                                                                                                                                                                                                                                                                                                                                                                                                                                                                                                                                                                                                                                                                                                                                                                                                                                                | Lab. Microbiologia e Virologia Cotugno A.O. dei Colli                                                                  | TIGEM                                                                                                                                                                                                                                                                                                                           |  | Antonio Grimaldi Patrizia Annunziata Francesco Panariello Claudia Tiberio Teresa Giuliano Valentina Bouche Chiara Colantuono Michela Daniele Lucio Di Filippo Anna Manfredi Marcello Salvi Antonio Limone Luigi Atripaldi Andrea Ballabio Davide Cacchiarelli                                                                                                                                                                                                                                                                                                                                                                                                                                                                                                                                                                |
| EPI_ISL_9748997,<br>EPI_ISL_9749000                                                                                                                                                                                                                                                                                                                                                                                                                                                                                                                                                                                                                                                                                                                                                                                                                                                                                                                                                                                                                                                                                                                                                                                                                                                                                                                                                                                                                                                                                                                                                                                                                                                                                                                                                                                                                                                                                                                                                                                                                                                                                                                                                                                                                                                                                                                                                                                                                                                                                                                                                                                                                                                                                                                                                                                                                                                                                                                                                                                                                                                                                                                                                                                                                                                                                                                                                                                                                                                                                                                                                                                                                                                                                                                                                                                                                                                                                                                                                                                                                                                                                                                                                                                                                                                                                                                                                                                                                                                                                                                                                                                                                                                                                                                                                                                                                                                                                                                                                                                                                                                                                                                                                                                                                                                                                                                                                                                                                                                                                                                                                                                                                                                                                                                                                                                                                                                                                                                                                                                                                                                                                                                                                                                                                                                                                                                                                                                                                                                                                                                                                                                                                                                                                                                                                                                                                                                                                                                                                                                                                                                                                                                                                                                                                                                                                                                                                                                                                                                                                                                                                                                                                                                                                                                                                                                                                                                                                                                                                                                                                                                                                                                                                                                                                                                                                                                                                                                                                                                                                                                                                                                                                                                                                                                                                                                                                                                                                                                                                                                                                                                                                                                                                                                                                                                                                                                                                                                                                                                                                                                                            | Lab. Mikrobiol. Radomski Szpital Specjalistyczny                                                                       | 1. Academic Center for Pathomorphological and Genetic-Molecular Diagnostics Ltd, Białystok, Poland 2. National Institute of Public Health - National Institute of Hygiene, Warsaw, Poland                                                                                                                                       |  | Anetta Sulewska; Jacek Nikliński; Janusz Dzięcioł; Joanna Kiśluk; Katarzyna Zacharczuk; Konrad Raczkowski; Magdalena Nowakowska; Małgorzata Sadkowska-Todys; Piotr Karabowicz; Piotr Majewski; Przemysław Bieчек. Joanna Reszeć; Radosław Charkiewicz; Tomasz Wolkowicz                                                                                                                                                                                                                                                                                                                                                                                                                                                                                                                                                      |
| EPI_ISL_9434090, EPI_ISL_9434220, EPI_ISL_9636511, EPI_ISL_9636559, EPI_ISL_9636561, EPI_ISL_9636567, EPI_ISL_9636573, EPI_ISL_9636580, EPI_ISL_9636583, EPI_ISL_9636665, EPI_ISL_9636668, EPI_ISL_9636720, EPI_ISL_9636776, EPI_ISL_9636780                                                                                                                                                                                                                                                                                                                                                                                                                                                                                                                                                                                                                                                                                                                                                                                                                                                                                                                                                                                                                                                                                                                                                                                                                                                                                                                                                                                                                                                                                                                                                                                                                                                                                                                                                                                                                                                                                                                                                                                                                                                                                                                                                                                                                                                                                                                                                                                                                                                                                                                                                                                                                                                                                                                                                                                                                                                                                                                                                                                                                                                                                                                                                                                                                                                                                                                                                                                                                                                                                                                                                                                                                                                                                                                                                                                                                                                                                                                                                                                                                                                                                                                                                                                                                                                                                                                                                                                                                                                                                                                                                                                                                                                                                                                                                                                                                                                                                                                                                                                                                                                                                                                                                                                                                                                                                                                                                                                                                                                                                                                                                                                                                                                                                                                                                                                                                                                                                                                                                                                                                                                                                                                                                                                                                                                                                                                                                                                                                                                                                                                                                                                                                                                                                                                                                                                                                                                                                                                                                                                                                                                                                                                                                                                                                                                                                                                                                                                                                                                                                                                                                                                                                                                                                                                                                                                                                                                                                                                                                                                                                                                                                                                                                                                                                                                                                                                                                                                                                                                                                                                                                                                                                                                                                                                                                                                                                                                                                                                                                                                                                                                                                                                                                                                                                                                                                                                                   | see above                                                                                                              | LabPLUS<br>Institute of Environmental Science and Research (ESR)                                                                                                                                                                                                                                                                |  | Anja Werno; Antje van der Linden; Arlo Upton; Chris Mansell; Clare Gebbie; David Hammer; Dhanisha Patel; Dragana Drinkovic; Erasmus Smit; Gary McAuliffe; Hana Sofia Andersson; Hermes Perez; James Ussher; Jill Sherwood; Jing Wang; Joep de Lig; Josh Freeman; Julia Howard; Juliet Ely; Lauren Jelly; Mary DeAlmeida; Matt Blakiston; Matt Storey; Matthew Rogers; Max Bloomfield; Michael Addie; Michelle Balm; Muhammad Faisal; Nikki Freed; Olin Silander; Olivia Stroeven; Rachel Boyle; Sally Roberts; SallyAnn Harbison; Sarah Cockerton; Sarah Jefferies; Sharmini Muttaiyah; Susan Morpeth; Susan Taylor; Timothy Blackmore; Vani Sathyendran; Veronica Playle; Virginia Hope; Xiaoyun Ren                                                                                                                        |
| EPI_ISL_9636489,<br>EPI_ISL_9636490,<br>EPI_ISL_9636492,<br>EPI_ISL_9636554                                                                                                                                                                                                                                                                                                                                                                                                                                                                                                                                                                                                                                                                                                                                                                                                                                                                                                                                                                                                                                                                                                                                                                                                                                                                                                                                                                                                                                                                                                                                                                                                                                                                                                                                                                                                                                                                                                                                                                                                                                                                                                                                                                                                                                                                                                                                                                                                                                                                                                                                                                                                                                                                                                                                                                                                                                                                                                                                                                                                                                                                                                                                                                                                                                                                                                                                                                                                                                                                                                                                                                                                                                                                                                                                                                                                                                                                                                                                                                                                                                                                                                                                                                                                                                                                                                                                                                                                                                                                                                                                                                                                                                                                                                                                                                                                                                                                                                                                                                                                                                                                                                                                                                                                                                                                                                                                                                                                                                                                                                                                                                                                                                                                                                                                                                                                                                                                                                                                                                                                                                                                                                                                                                                                                                                                                                                                                                                                                                                                                                                                                                                                                                                                                                                                                                                                                                                                                                                                                                                                                                                                                                                                                                                                                                                                                                                                                                                                                                                                                                                                                                                                                                                                                                                                                                                                                                                                                                                                                                                                                                                                                                                                                                                                                                                                                                                                                                                                                                                                                                                                                                                                                                                                                                                                                                                                                                                                                                                                                                                                                                                                                                                                                                                                                                                                                                                                                                                                                                                                                                    | LabTests                                                                                                               | Institute of Environmental Science and Research (ESR)                                                                                                                                                                                                                                                                           |  | Anja Werno; Antje van der Linden; Arlo Upton; Chris Mansell; Clare Gebbie; David Hammer; Dhanisha Patel; Dragana Drinkovic; Erasmus Smit; Gary McAuliffe; Hana Sofia Andersson; Hermes Perez; James Ussher; Jill Sherwood; Jing Wang; Joep de Lig; Josh Freeman; Julia Howard; Juliet Ely; Lauren Jelly; Mary DeAlmeida; Matt Blakiston; Matt Storey; Matthew Rogers; Max Bloomfield; Michael Addie; Michelle Balm; Muhammad Faisal; Nikki Freed; Olin Silander; Olivia Stroeven; Rachel Boyle; Sally Roberts; SallyAnn Harbison; Sarah Cockerton; Sarah Jefferies; Sharmini Muttaiyah; Susan Morpeth; Susan Taylor; Timothy Blackmore; Vani Sathyendran; Veronica Playle; Virginia Hope; Xiaoyun Ren<br>Barbara Mühlemann; Christian Drosten; Christine Stephan; Peter Menzel; Rolf Schwarzer; Terry Jones; Victor M Corman |
| EPI_ISL_9665093,<br>EPI_ISL_9665122,<br>EPI_ISL_9665142,<br>EPI_ISL_9665168,<br>EPI_ISL_9665175                                                                                                                                                                                                                                                                                                                                                                                                                                                                                                                                                                                                                                                                                                                                                                                                                                                                                                                                                                                                                                                                                                                                                                                                                                                                                                                                                                                                                                                                                                                                                                                                                                                                                                                                                                                                                                                                                                                                                                                                                                                                                                                                                                                                                                                                                                                                                                                                                                                                                                                                                                                                                                                                                                                                                                                                                                                                                                                                                                                                                                                                                                                                                                                                                                                                                                                                                                                                                                                                                                                                                                                                                                                                                                                                                                                                                                                                                                                                                                                                                                                                                                                                                                                                                                                                                                                                                                                                                                                                                                                                                                                                                                                                                                                                                                                                                                                                                                                                                                                                                                                                                                                                                                                                                                                                                                                                                                                                                                                                                                                                                                                                                                                                                                                                                                                                                                                                                                                                                                                                                                                                                                                                                                                                                                                                                                                                                                                                                                                                                                                                                                                                                                                                                                                                                                                                                                                                                                                                                                                                                                                                                                                                                                                                                                                                                                                                                                                                                                                                                                                                                                                                                                                                                                                                                                                                                                                                                                                                                                                                                                                                                                                                                                                                                                                                                                                                                                                                                                                                                                                                                                                                                                                                                                                                                                                                                                                                                                                                                                                                                                                                                                                                                                                                                                                                                                                                                                                                                                                                                | Labor Berlin Charité Vivantes GmbH / Institut für Virologie                                                            | Charité Universitätsmedizin Berlin, Institut für Virologie/Labor Berlin                                                                                                                                                                                                                                                         |  |                                                                                                                                                                                                                                                                                                                                                                                                                                                                                                                                                                                                                                                                                                                                                                                                                              |
| EPI_ISL_9462026,<br>EPI_ISL_9462388,<br>EPI_ISL_9725880                                                                                                                                                                                                                                                                                                                                                                                                                                                                                                                                                                                                                                                                                                                                                                                                                                                                                                                                                                                                                                                                                                                                                                                                                                                                                                                                                                                                                                                                                                                                                                                                                                                                                                                                                                                                                                                                                                                                                                                                                                                                                                                                                                                                                                                                                                                                                                                                                                                                                                                                                                                                                                                                                                                                                                                                                                                                                                                                                                                                                                                                                                                                                                                                                                                                                                                                                                                                                                                                                                                                                                                                                                                                                                                                                                                                                                                                                                                                                                                                                                                                                                                                                                                                                                                                                                                                                                                                                                                                                                                                                                                                                                                                                                                                                                                                                                                                                                                                                                                                                                                                                                                                                                                                                                                                                                                                                                                                                                                                                                                                                                                                                                                                                                                                                                                                                                                                                                                                                                                                                                                                                                                                                                                                                                                                                                                                                                                                                                                                                                                                                                                                                                                                                                                                                                                                                                                                                                                                                                                                                                                                                                                                                                                                                                                                                                                                                                                                                                                                                                                                                                                                                                                                                                                                                                                                                                                                                                                                                                                                                                                                                                                                                                                                                                                                                                                                                                                                                                                                                                                                                                                                                                                                                                                                                                                                                                                                                                                                                                                                                                                                                                                                                                                                                                                                                                                                                                                                                                                                                                                        | Labor Dr. Brunner Konstanz                                                                                             | Robert Koch Institute                                                                                                                                                                                                                                                                                                           |  |                                                                                                                                                                                                                                                                                                                                                                                                                                                                                                                                                                                                                                                                                                                                                                                                                              |
| EPI_ISL_9462428, EPI_ISL_9462434, EPI_ISL_9462435, EPI_ISL_9462438, EPI_ISL_9462439, EPI_ISL_9462442, EPI_ISL_9462449, EPI_ISL_9462471, EPI_ISL_9725997, EPI_ISL_9726037, EPI_ISL_9726048, EPI_ISL_9726071, EPI_ISL_9726096, EPI_ISL_9726105, EPI_ISL_9726107, EPI_ISL_9726111, EPI_ISL_9726114, EPI_ISL_9726117, EPI_ISL_9726121, EPI_ISL_9726127, EPI_ISL_9726130, EPI_ISL_9726159                                                                                                                                                                                                                                                                                                                                                                                                                                                                                                                                                                                                                                                                                                                                                                                                                                                                                                                                                                                                                                                                                                                                                                                                                                                                                                                                                                                                                                                                                                                                                                                                                                                                                                                                                                                                                                                                                                                                                                                                                                                                                                                                                                                                                                                                                                                                                                                                                                                                                                                                                                                                                                                                                                                                                                                                                                                                                                                                                                                                                                                                                                                                                                                                                                                                                                                                                                                                                                                                                                                                                                                                                                                                                                                                                                                                                                                                                                                                                                                                                                                                                                                                                                                                                                                                                                                                                                                                                                                                                                                                                                                                                                                                                                                                                                                                                                                                                                                                                                                                                                                                                                                                                                                                                                                                                                                                                                                                                                                                                                                                                                                                                                                                                                                                                                                                                                                                                                                                                                                                                                                                                                                                                                                                                                                                                                                                                                                                                                                                                                                                                                                                                                                                                                                                                                                                                                                                                                                                                                                                                                                                                                                                                                                                                                                                                                                                                                                                                                                                                                                                                                                                                                                                                                                                                                                                                                                                                                                                                                                                                                                                                                                                                                                                                                                                                                                                                                                                                                                                                                                                                                                                                                                                                                                                                                                                                                                                                                                                                                                                                                                                                                                                                                                           | see above                                                                                                              | Labor Lübeck bzw. Laborärztliche Gemeinschaftspraxis Lübeck<br>Robert Koch Institute                                                                                                                                                                                                                                            |  |                                                                                                                                                                                                                                                                                                                                                                                                                                                                                                                                                                                                                                                                                                                                                                                                                              |
| EPI_ISL_9716776, EPI_ISL_9716841, EPI_ISL_9716908, EPI_ISL_9716911, EPI_ISL_9716989, EPI_ISL_9717004, EPI_ISL_9724609, EPI_ISL_9724618, EPI_ISL_9748362, EPI_ISL_9748422                                                                                                                                                                                                                                                                                                                                                                                                                                                                                                                                                                                                                                                                                                                                                                                                                                                                                                                                                                                                                                                                                                                                                                                                                                                                                                                                                                                                                                                                                                                                                                                                                                                                                                                                                                                                                                                                                                                                                                                                                                                                                                                                                                                                                                                                                                                                                                                                                                                                                                                                                                                                                                                                                                                                                                                                                                                                                                                                                                                                                                                                                                                                                                                                                                                                                                                                                                                                                                                                                                                                                                                                                                                                                                                                                                                                                                                                                                                                                                                                                                                                                                                                                                                                                                                                                                                                                                                                                                                                                                                                                                                                                                                                                                                                                                                                                                                                                                                                                                                                                                                                                                                                                                                                                                                                                                                                                                                                                                                                                                                                                                                                                                                                                                                                                                                                                                                                                                                                                                                                                                                                                                                                                                                                                                                                                                                                                                                                                                                                                                                                                                                                                                                                                                                                                                                                                                                                                                                                                                                                                                                                                                                                                                                                                                                                                                                                                                                                                                                                                                                                                                                                                                                                                                                                                                                                                                                                                                                                                                                                                                                                                                                                                                                                                                                                                                                                                                                                                                                                                                                                                                                                                                                                                                                                                                                                                                                                                                                                                                                                                                                                                                                                                                                                                                                                                                                                                                                                       | see above                                                                                                              | Labor Mönchengladbach MVZ Dr. Stein + Kollegen GbR<br>Robert Koch Institute                                                                                                                                                                                                                                                     |  |                                                                                                                                                                                                                                                                                                                                                                                                                                                                                                                                                                                                                                                                                                                                                                                                                              |
| EPI_ISL_9604726,<br>EPI_ISL_9604763,<br>EPI_ISL_9604777                                                                                                                                                                                                                                                                                                                                                                                                                                                                                                                                                                                                                                                                                                                                                                                                                                                                                                                                                                                                                                                                                                                                                                                                                                                                                                                                                                                                                                                                                                                                                                                                                                                                                                                                                                                                                                                                                                                                                                                                                                                                                                                                                                                                                                                                                                                                                                                                                                                                                                                                                                                                                                                                                                                                                                                                                                                                                                                                                                                                                                                                                                                                                                                                                                                                                                                                                                                                                                                                                                                                                                                                                                                                                                                                                                                                                                                                                                                                                                                                                                                                                                                                                                                                                                                                                                                                                                                                                                                                                                                                                                                                                                                                                                                                                                                                                                                                                                                                                                                                                                                                                                                                                                                                                                                                                                                                                                                                                                                                                                                                                                                                                                                                                                                                                                                                                                                                                                                                                                                                                                                                                                                                                                                                                                                                                                                                                                                                                                                                                                                                                                                                                                                                                                                                                                                                                                                                                                                                                                                                                                                                                                                                                                                                                                                                                                                                                                                                                                                                                                                                                                                                                                                                                                                                                                                                                                                                                                                                                                                                                                                                                                                                                                                                                                                                                                                                                                                                                                                                                                                                                                                                                                                                                                                                                                                                                                                                                                                                                                                                                                                                                                                                                                                                                                                                                                                                                                                                                                                                                                                        | Laboratoire Bioconcorde                                                                                                | Department of Virology, Henri Mondor University Hospital, Assistance Publique Hôpitaux de Paris, Université Paris-Est Créteil, INSERM U955                                                                                                                                                                                      |  | Alexandre Soulier; Christophe Rodriguez; Elisabeth Trawinski; Guillaume Gricourt; Jean-Michel Pawlatsky; Melissa N'Debi; Slim Fourati; Vanessa Demontant                                                                                                                                                                                                                                                                                                                                                                                                                                                                                                                                                                                                                                                                     |
| EPI_ISL_9673357, EPI_ISL_9673360, EPI_ISL_9673362, EPI_ISL_9673374, EPI_ISL_9673379, EPI_ISL_9673398, EPI_ISL_9673428                                                                                                                                                                                                                                                                                                                                                                                                                                                                                                                                                                                                                                                                                                                                                                                                                                                                                                                                                                                                                                                                                                                                                                                                                                                                                                                                                                                                                                                                                                                                                                                                                                                                                                                                                                                                                                                                                                                                                                                                                                                                                                                                                                                                                                                                                                                                                                                                                                                                                                                                                                                                                                                                                                                                                                                                                                                                                                                                                                                                                                                                                                                                                                                                                                                                                                                                                                                                                                                                                                                                                                                                                                                                                                                                                                                                                                                                                                                                                                                                                                                                                                                                                                                                                                                                                                                                                                                                                                                                                                                                                                                                                                                                                                                                                                                                                                                                                                                                                                                                                                                                                                                                                                                                                                                                                                                                                                                                                                                                                                                                                                                                                                                                                                                                                                                                                                                                                                                                                                                                                                                                                                                                                                                                                                                                                                                                                                                                                                                                                                                                                                                                                                                                                                                                                                                                                                                                                                                                                                                                                                                                                                                                                                                                                                                                                                                                                                                                                                                                                                                                                                                                                                                                                                                                                                                                                                                                                                                                                                                                                                                                                                                                                                                                                                                                                                                                                                                                                                                                                                                                                                                                                                                                                                                                                                                                                                                                                                                                                                                                                                                                                                                                                                                                                                                                                                                                                                                                                                                          | see above                                                                                                              | Laboratoria Medyczne Bruss grupa ALAB sp. z o.o.; Medyczne Laboratorium Diagnostyczne, Pracownia Genetyki<br>1. Tricity SARS-CoV-2 sequencing consortium: University of Gdansk, Medical University of Gdansk, Vaxican Ltd., Invicta Ltd. 2. National Institute of Public Health - National Institute of Hygiene, Warsaw, Poland |  | Celina Cybulska; Karolina Gackowska; Katarzyna Groth; Katarzyna Zacharczuk; Krystyna Bienkowska Szewczyk; Lukasz Rabalski; Maciej Grzybek; Maciej Kosinski; Magdalena Nowakowska; Marcin Lubocki; Małgorzata Sadkowska-Todys; Tomasz Wolkowicz                                                                                                                                                                                                                                                                                                                                                                                                                                                                                                                                                                               |
| EPI_ISL_9719801,<br>EPI_ISL_9719809                                                                                                                                                                                                                                                                                                                                                                                                                                                                                                                                                                                                                                                                                                                                                                                                                                                                                                                                                                                                                                                                                                                                                                                                                                                                                                                                                                                                                                                                                                                                                                                                                                                                                                                                                                                                                                                                                                                                                                                                                                                                                                                                                                                                                                                                                                                                                                                                                                                                                                                                                                                                                                                                                                                                                                                                                                                                                                                                                                                                                                                                                                                                                                                                                                                                                                                                                                                                                                                                                                                                                                                                                                                                                                                                                                                                                                                                                                                                                                                                                                                                                                                                                                                                                                                                                                                                                                                                                                                                                                                                                                                                                                                                                                                                                                                                                                                                                                                                                                                                                                                                                                                                                                                                                                                                                                                                                                                                                                                                                                                                                                                                                                                                                                                                                                                                                                                                                                                                                                                                                                                                                                                                                                                                                                                                                                                                                                                                                                                                                                                                                                                                                                                                                                                                                                                                                                                                                                                                                                                                                                                                                                                                                                                                                                                                                                                                                                                                                                                                                                                                                                                                                                                                                                                                                                                                                                                                                                                                                                                                                                                                                                                                                                                                                                                                                                                                                                                                                                                                                                                                                                                                                                                                                                                                                                                                                                                                                                                                                                                                                                                                                                                                                                                                                                                                                                                                                                                                                                                                                                                                            | Laboratorio CQRC                                                                                                       | CQRC_QUALITY CONTROL CHEMICAL BIOLOGICAL RISK_AOOR Villa Sofia Cervello Palermo                                                                                                                                                                                                                                                 |  | Brunacci G.; Contino F.; Di Gaudio F.                                                                                                                                                                                                                                                                                                                                                                                                                                                                                                                                                                                                                                                                                                                                                                                        |
| EPI_ISL_9679210,<br>EPI_ISL_9679233                                                                                                                                                                                                                                                                                                                                                                                                                                                                                                                                                                                                                                                                                                                                                                                                                                                                                                                                                                                                                                                                                                                                                                                                                                                                                                                                                                                                                                                                                                                                                                                                                                                                                                                                                                                                                                                                                                                                                                                                                                                                                                                                                                                                                                                                                                                                                                                                                                                                                                                                                                                                                                                                                                                                                                                                                                                                                                                                                                                                                                                                                                                                                                                                                                                                                                                                                                                                                                                                                                                                                                                                                                                                                                                                                                                                                                                                                                                                                                                                                                                                                                                                                                                                                                                                                                                                                                                                                                                                                                                                                                                                                                                                                                                                                                                                                                                                                                                                                                                                                                                                                                                                                                                                                                                                                                                                                                                                                                                                                                                                                                                                                                                                                                                                                                                                                                                                                                                                                                                                                                                                                                                                                                                                                                                                                                                                                                                                                                                                                                                                                                                                                                                                                                                                                                                                                                                                                                                                                                                                                                                                                                                                                                                                                                                                                                                                                                                                                                                                                                                                                                                                                                                                                                                                                                                                                                                                                                                                                                                                                                                                                                                                                                                                                                                                                                                                                                                                                                                                                                                                                                                                                                                                                                                                                                                                                                                                                                                                                                                                                                                                                                                                                                                                                                                                                                                                                                                                                                                                                                                                            | Laboratorio di Epidemiologia Molecolare e Sanità Pubblica-Policlinico                                                  | University of Bari Biomedical Sciences and Human Oncology                                                                                                                                                                                                                                                                       |  | Accogli Marisa; Chironna Maria; Loconsole Daniela; Sallustio Anna                                                                                                                                                                                                                                                                                                                                                                                                                                                                                                                                                                                                                                                                                                                                                            |
| EPI_ISL_9679209                                                                                                                                                                                                                                                                                                                                                                                                                                                                                                                                                                                                                                                                                                                                                                                                                                                                                                                                                                                                                                                                                                                                                                                                                                                                                                                                                                                                                                                                                                                                                                                                                                                                                                                                                                                                                                                                                                                                                                                                                                                                                                                                                                                                                                                                                                                                                                                                                                                                                                                                                                                                                                                                                                                                                                                                                                                                                                                                                                                                                                                                                                                                                                                                                                                                                                                                                                                                                                                                                                                                                                                                                                                                                                                                                                                                                                                                                                                                                                                                                                                                                                                                                                                                                                                                                                                                                                                                                                                                                                                                                                                                                                                                                                                                                                                                                                                                                                                                                                                                                                                                                                                                                                                                                                                                                                                                                                                                                                                                                                                                                                                                                                                                                                                                                                                                                                                                                                                                                                                                                                                                                                                                                                                                                                                                                                                                                                                                                                                                                                                                                                                                                                                                                                                                                                                                                                                                                                                                                                                                                                                                                                                                                                                                                                                                                                                                                                                                                                                                                                                                                                                                                                                                                                                                                                                                                                                                                                                                                                                                                                                                                                                                                                                                                                                                                                                                                                                                                                                                                                                                                                                                                                                                                                                                                                                                                                                                                                                                                                                                                                                                                                                                                                                                                                                                                                                                                                                                                                                                                                                                                                | Laboratorio di Epidemiologia Molecolare e Sanità Pubblica-Policlinico, Bari                                            | University of Bari Biomedical Sciences and Human Oncology                                                                                                                                                                                                                                                                       |  | Accogli Marisa; Chironna Maria; Loconsole Daniela; Sallustio Anna                                                                                                                                                                                                                                                                                                                                                                                                                                                                                                                                                                                                                                                                                                                                                            |
| EPI_ISL_9712906,<br>EPI_ISL_9712974                                                                                                                                                                                                                                                                                                                                                                                                                                                                                                                                                                                                                                                                                                                                                                                                                                                                                                                                                                                                                                                                                                                                                                                                                                                                                                                                                                                                                                                                                                                                                                                                                                                                                                                                                                                                                                                                                                                                                                                                                                                                                                                                                                                                                                                                                                                                                                                                                                                                                                                                                                                                                                                                                                                                                                                                                                                                                                                                                                                                                                                                                                                                                                                                                                                                                                                                                                                                                                                                                                                                                                                                                                                                                                                                                                                                                                                                                                                                                                                                                                                                                                                                                                                                                                                                                                                                                                                                                                                                                                                                                                                                                                                                                                                                                                                                                                                                                                                                                                                                                                                                                                                                                                                                                                                                                                                                                                                                                                                                                                                                                                                                                                                                                                                                                                                                                                                                                                                                                                                                                                                                                                                                                                                                                                                                                                                                                                                                                                                                                                                                                                                                                                                                                                                                                                                                                                                                                                                                                                                                                                                                                                                                                                                                                                                                                                                                                                                                                                                                                                                                                                                                                                                                                                                                                                                                                                                                                                                                                                                                                                                                                                                                                                                                                                                                                                                                                                                                                                                                                                                                                                                                                                                                                                                                                                                                                                                                                                                                                                                                                                                                                                                                                                                                                                                                                                                                                                                                                                                                                                                                            | Laboratorium Analiz Lekarskich ALAB Łódź                                                                               | 1. Academic Center for Pathomorphological and Genetic-Molecular Diagnostics Ltd, Białystok, Poland 2. National Institute of Public Health - National Institute of Hygiene, Warsaw, Poland                                                                                                                                       |  | Anetta Sulewska; Jacek Nikliński; Janusz Dzięcioł; Joanna Kiśluk; Katarzyna Zacharczuk; Konrad Raczkowski; Magdalena Nowakowska; Małgorzata Sadkowska-Todys; Piotr Karabowicz; Piotr Majewski; Przemysław Bieчек. Joanna Reszeć; Radosław Charkiewicz; Tomasz Wolkowicz                                                                                                                                                                                                                                                                                                                                                                                                                                                                                                                                                      |
| EPI_ISL_9687953,<br>EPI_ISL_9687988,<br>EPI_ISL_9688113,<br>EPI_ISL_9688123                                                                                                                                                                                                                                                                                                                                                                                                                                                                                                                                                                                                                                                                                                                                                                                                                                                                                                                                                                                                                                                                                                                                                                                                                                                                                                                                                                                                                                                                                                                                                                                                                                                                                                                                                                                                                                                                                                                                                                                                                                                                                                                                                                                                                                                                                                                                                                                                                                                                                                                                                                                                                                                                                                                                                                                                                                                                                                                                                                                                                                                                                                                                                                                                                                                                                                                                                                                                                                                                                                                                                                                                                                                                                                                                                                                                                                                                                                                                                                                                                                                                                                                                                                                                                                                                                                                                                                                                                                                                                                                                                                                                                                                                                                                                                                                                                                                                                                                                                                                                                                                                                                                                                                                                                                                                                                                                                                                                                                                                                                                                                                                                                                                                                                                                                                                                                                                                                                                                                                                                                                                                                                                                                                                                                                                                                                                                                                                                                                                                                                                                                                                                                                                                                                                                                                                                                                                                                                                                                                                                                                                                                                                                                                                                                                                                                                                                                                                                                                                                                                                                                                                                                                                                                                                                                                                                                                                                                                                                                                                                                                                                                                                                                                                                                                                                                                                                                                                                                                                                                                                                                                                                                                                                                                                                                                                                                                                                                                                                                                                                                                                                                                                                                                                                                                                                                                                                                                                                                                                                                                    | Laboratorium Centralne Krotoszyn                                                                                       | 1. Academic Center for Pathomorphological and Genetic-Molecular Diagnostics Ltd, Białystok, Poland 2. National Institute of Public Health - National Institute of Hygiene, Warsaw, Poland                                                                                                                                       |  | Anetta Sulewska; Jacek Nikliński; Janusz Dzięcioł; Joanna Kiśluk; Katarzyna Zacharczuk; Konrad Raczkowski; Magdalena Nowakowska; Małgorzata Sadkowska-Todys; Piotr Karabowicz; Piotr Majewski; Przemysław Bieчек. Joanna Reszeć; Radosław Charkiewicz; Tomasz Wolkowicz                                                                                                                                                                                                                                                                                                                                                                                                                                                                                                                                                      |
| EPI_ISL_9725684,<br>EPI_ISL_9725733                                                                                                                                                                                                                                                                                                                                                                                                                                                                                                                                                                                                                                                                                                                                                                                                                                                                                                                                                                                                                                                                                                                                                                                                                                                                                                                                                                                                                                                                                                                                                                                                                                                                                                                                                                                                                                                                                                                                                                                                                                                                                                                                                                                                                                                                                                                                                                                                                                                                                                                                                                                                                                                                                                                                                                                                                                                                                                                                                                                                                                                                                                                                                                                                                                                                                                                                                                                                                                                                                                                                                                                                                                                                                                                                                                                                                                                                                                                                                                                                                                                                                                                                                                                                                                                                                                                                                                                                                                                                                                                                                                                                                                                                                                                                                                                                                                                                                                                                                                                                                                                                                                                                                                                                                                                                                                                                                                                                                                                                                                                                                                                                                                                                                                                                                                                                                                                                                                                                                                                                                                                                                                                                                                                                                                                                                                                                                                                                                                                                                                                                                                                                                                                                                                                                                                                                                                                                                                                                                                                                                                                                                                                                                                                                                                                                                                                                                                                                                                                                                                                                                                                                                                                                                                                                                                                                                                                                                                                                                                                                                                                                                                                                                                                                                                                                                                                                                                                                                                                                                                                                                                                                                                                                                                                                                                                                                                                                                                                                                                                                                                                                                                                                                                                                                                                                                                                                                                                                                                                                                                                                            | Laboratorium Diagnostyczne Centrum Medyczne LuxMed                                                                     | Wojewódzka Stacja Sanitarno-Epidemiologiczna w Rzeszowie, Laboratorium Diagnostyki Medycznej                                                                                                                                                                                                                                    |  | Anna Nowakowska; Karolina Ostrowska; Katarzyna Wilk; Marzena Baranowska                                                                                                                                                                                                                                                                                                                                                                                                                                                                                                                                                                                                                                                                                                                                                      |
| EPI_ISL_9687944,<br>EPI_ISL_9687978,<br>EPI_ISL_9687981                                                                                                                                                                                                                                                                                                                                                                                                                                                                                                                                                                                                                                                                                                                                                                                                                                                                                                                                                                                                                                                                                                                                                                                                                                                                                                                                                                                                                                                                                                                                                                                                                                                                                                                                                                                                                                                                                                                                                                                                                                                                                                                                                                                                                                                                                                                                                                                                                                                                                                                                                                                                                                                                                                                                                                                                                                                                                                                                                                                                                                                                                                                                                                                                                                                                                                                                                                                                                                                                                                                                                                                                                                                                                                                                                                                                                                                                                                                                                                                                                                                                                                                                                                                                                                                                                                                                                                                                                                                                                                                                                                                                                                                                                                                                                                                                                                                                                                                                                                                                                                                                                                                                                                                                                                                                                                                                                                                                                                                                                                                                                                                                                                                                                                                                                                                                                                                                                                                                                                                                                                                                                                                                                                                                                                                                                                                                                                                                                                                                                                                                                                                                                                                                                                                                                                                                                                                                                                                                                                                                                                                                                                                                                                                                                                                                                                                                                                                                                                                                                                                                                                                                                                                                                                                                                                                                                                                                                                                                                                                                                                                                                                                                                                                                                                                                                                                                                                                                                                                                                                                                                                                                                                                                                                                                                                                                                                                                                                                                                                                                                                                                                                                                                                                                                                                                                                                                                                                                                                                                                                                        | Laboratorium Diagnostyczno-Analityczne Poznań                                                                          | 1. Academic Center for Pathomorphological and Genetic-Molecular Diagnostics Ltd, Białystok, Poland 2. National Institute of Public Health - National Institute of Hygiene, Warsaw, Poland                                                                                                                                       |  | Anetta Sulewska; Jacek Nikliński; Janusz Dzięcioł; Joanna Kiśluk; Katarzyna Zacharczuk; Konrad Raczkowski; Magdalena Nowakowska; Małgorzata Sadkowska-Todys; Piotr Karabowicz; Piotr Majewski; Przemysław Bieчек. Joanna Reszeć; Radosław Charkiewicz; Tomasz Wolkowicz                                                                                                                                                                                                                                                                                                                                                                                                                                                                                                                                                      |
| EPI_ISL_9753028                                                                                                                                                                                                                                                                                                                                                                                                                                                                                                                                                                                                                                                                                                                                                                                                                                                                                                                                                                                                                                                                                                                                                                                                                                                                                                                                                                                                                                                                                                                                                                                                                                                                                                                                                                                                                                                                                                                                                                                                                                                                                                                                                                                                                                                                                                                                                                                                                                                                                                                                                                                                                                                                                                                                                                                                                                                                                                                                                                                                                                                                                                                                                                                                                                                                                                                                                                                                                                                                                                                                                                                                                                                                                                                                                                                                                                                                                                                                                                                                                                                                                                                                                                                                                                                                                                                                                                                                                                                                                                                                                                                                                                                                                                                                                                                                                                                                                                                                                                                                                                                                                                                                                                                                                                                                                                                                                                                                                                                                                                                                                                                                                                                                                                                                                                                                                                                                                                                                                                                                                                                                                                                                                                                                                                                                                                                                                                                                                                                                                                                                                                                                                                                                                                                                                                                                                                                                                                                                                                                                                                                                                                                                                                                                                                                                                                                                                                                                                                                                                                                                                                                                                                                                                                                                                                                                                                                                                                                                                                                                                                                                                                                                                                                                                                                                                                                                                                                                                                                                                                                                                                                                                                                                                                                                                                                                                                                                                                                                                                                                                                                                                                                                                                                                                                                                                                                                                                                                                                                                                                                                                                | Laboratorium Diagnostyki COVID-19 w Instytucie Genetyki Człowieka PAN                                                  | Wojewódzka Stacja Sanitarno-Epidemiologiczna w Łodzi, Oddział Laboratoryjny Mikrobiologii i Parazytologii                                                                                                                                                                                                                       |  | Agnieszka Karnowska; Aleksandra Krawczyk; Danuta Bartczak; Elian Terpo; Katarzyna Kosowska; Lucyna Kochanowska; Marta Gawronska; Martyna Matera; Szymon Konkolewski                                                                                                                                                                                                                                                                                                                                                                                                                                                                                                                                                                                                                                                          |
| EPI_ISL_9161448, EPI_ISL_9161449, EPI_ISL_9161482, EPI_ISL_9161495, EPI_ISL_9161499, EPI_ISL_9161526, EPI_ISL_9316019, EPI_ISL_9316023, EPI_ISL_9316052, EPI_ISL_9316055, EPI_ISL_9316069                                                                                                                                                                                                                                                                                                                                                                                                                                                                                                                                                                                                                                                                                                                                                                                                                                                                                                                                                                                                                                                                                                                                                                                                                                                                                                                                                                                                                                                                                                                                                                                                                                                                                                                                                                                                                                                                                                                                                                                                                                                                                                                                                                                                                                                                                                                                                                                                                                                                                                                                                                                                                                                                                                                                                                                                                                                                                                                                                                                                                                                                                                                                                                                                                                                                                                                                                                                                                                                                                                                                                                                                                                                                                                                                                                                                                                                                                                                                                                                                                                                                                                                                                                                                                                                                                                                                                                                                                                                                                                                                                                                                                                                                                                                                                                                                                                                                                                                                                                                                                                                                                                                                                                                                                                                                                                                                                                                                                                                                                                                                                                                                                                                                                                                                                                                                                                                                                                                                                                                                                                                                                                                                                                                                                                                                                                                                                                                                                                                                                                                                                                                                                                                                                                                                                                                                                                                                                                                                                                                                                                                                                                                                                                                                                                                                                                                                                                                                                                                                                                                                                                                                                                                                                                                                                                                                                                                                                                                                                                                                                                                                                                                                                                                                                                                                                                                                                                                                                                                                                                                                                                                                                                                                                                                                                                                                                                                                                                                                                                                                                                                                                                                                                                                                                                                                                                                                                                                      | see above                                                                                                              | Laboratorium Diagnostyki Medycznej<br>Wojewódzka Stacja Sanitarno-Epidemiologiczna w Gdańsku                                                                                                                                                                                                                                    |  | Barbara Skórczewska; Gabriela Rutkowska; Karolina Smarzyńska; Marta Piszczyk                                                                                                                                                                                                                                                                                                                                                                                                                                                                                                                                                                                                                                                                                                                                                 |
| EPI_ISL_9275214                                                                                                                                                                                                                                                                                                                                                                                                                                                                                                                                                                                                                                                                                                                                                                                                                                                                                                                                                                                                                                                                                                                                                                                                                                                                                                                                                                                                                                                                                                                                                                                                                                                                                                                                                                                                                                                                                                                                                                                                                                                                                                                                                                                                                                                                                                                                                                                                                                                                                                                                                                                                                                                                                                                                                                                                                                                                                                                                                                                                                                                                                                                                                                                                                                                                                                                                                                                                                                                                                                                                                                                                                                                                                                                                                                                                                                                                                                                                                                                                                                                                                                                                                                                                                                                                                                                                                                                                                                                                                                                                                                                                                                                                                                                                                                                                                                                                                                                                                                                                                                                                                                                                                                                                                                                                                                                                                                                                                                                                                                                                                                                                                                                                                                                                                                                                                                                                                                                                                                                                                                                                                                                                                                                                                                                                                                                                                                                                                                                                                                                                                                                                                                                                                                                                                                                                                                                                                                                                                                                                                                                                                                                                                                                                                                                                                                                                                                                                                                                                                                                                                                                                                                                                                                                                                                                                                                                                                                                                                                                                                                                                                                                                                                                                                                                                                                                                                                                                                                                                                                                                                                                                                                                                                                                                                                                                                                                                                                                                                                                                                                                                                                                                                                                                                                                                                                                                                                                                                                                                                                                                                                | Laboratorium Medyczne GynCentrum - Oddział Sosnowiec                                                                   | Wojewódzka Stacja Sanitarno-Epidemiologiczna w Katowicach                                                                                                                                                                                                                                                                       |  | Adrian Miara; Agata Chajda; Beata Rozwadowska; Elżbieta Bartkowiak; Marta Albertyńska                                                                                                                                                                                                                                                                                                                                                                                                                                                                                                                                                                                                                                                                                                                                        |
| EPI_ISL_9627842<br>EPI_ISL_9571745                                                                                                                                                                                                                                                                                                                                                                                                                                                                                                                                                                                                                                                                                                                                                                                                                                                                                                                                                                                                                                                                                                                                                                                                                                                                                                                                                                                                                                                                                                                                                                                                                                                                                                                                                                                                                                                                                                                                                                                                                                                                                                                                                                                                                                                                                                                                                                                                                                                                                                                                                                                                                                                                                                                                                                                                                                                                                                                                                                                                                                                                                                                                                                                                                                                                                                                                                                                                                                                                                                                                                                                                                                                                                                                                                                                                                                                                                                                                                                                                                                                                                                                                                                                                                                                                                                                                                                                                                                                                                                                                                                                                                                                                                                                                                                                                                                                                                                                                                                                                                                                                                                                                                                                                                                                                                                                                                                                                                                                                                                                                                                                                                                                                                                                                                                                                                                                                                                                                                                                                                                                                                                                                                                                                                                                                                                                                                                                                                                                                                                                                                                                                                                                                                                                                                                                                                                                                                                                                                                                                                                                                                                                                                                                                                                                                                                                                                                                                                                                                                                                                                                                                                                                                                                                                                                                                                                                                                                                                                                                                                                                                                                                                                                                                                                                                                                                                                                                                                                                                                                                                                                                                                                                                                                                                                                                                                                                                                                                                                                                                                                                                                                                                                                                                                                                                                                                                                                                                                                                                                                                                             | Laboratorium Medyczne Synevo Wrocław<br>Laboratory of Respiratory Viruses and Measles, Oswaldo Cruz Institute, FIOCRUZ | Wojewódzka Stacja Sanitarno-Epidemiologiczna w Gorzowie Wielkopolskim<br>Laboratory of Respiratory Viruses and Measles, Oswaldo Cruz Institute, FIOCRUZ                                                                                                                                                                         |  | Elzbieta Justynska; Klaudia Kobenzka-Włodarczak; Patrycja Faberska; Patrycja Rakowska and Marek Margol; Renata Siegel<br>Alice Sampaio Rocha; Bruna Mendonça da Silva; Elisa Cavalcante Pereira; Fernando Motta; Igor Alves; Jéssica Graça Macedo de Carvalho; Larissa Macedo Pinto; Luciana Appolinario; Marilda Siqueira on behalf of the Fio Cruz COVID-19 Genomic Surveillance Network; Paola Resende; Victor Guimarães                                                                                                                                                                                                                                                                                                                                                                                                  |
| EPI_ISL_9417229, EPI_ISL_9417230, EPI_ISL_9417231, EPI_ISL_9417232, EPI_ISL_9417233, EPI_ISL_9417234, EPI_ISL_9417235, EPI_ISL_9417236, EPI_ISL_9417237, EPI_ISL_9417238, EPI_ISL_9417239, EPI_ISL_9417240, EPI_ISL_9417241, EPI_ISL_9417242, EPI_ISL_9417243                                                                                                                                                                                                                                                                                                                                                                                                                                                                                                                                                                                                                                                                                                                                                                                                                                                                                                                                                                                                                                                                                                                                                                                                                                                                                                                                                                                                                                                                                                                                                                                                                                                                                                                                                                                                                                                                                                                                                                                                                                                                                                                                                                                                                                                                                                                                                                                                                                                                                                                                                                                                                                                                                                                                                                                                                                                                                                                                                                                                                                                                                                                                                                                                                                                                                                                                                                                                                                                                                                                                                                                                                                                                                                                                                                                                                                                                                                                                                                                                                                                                                                                                                                                                                                                                                                                                                                                                                                                                                                                                                                                                                                                                                                                                                                                                                                                                                                                                                                                                                                                                                                                                                                                                                                                                                                                                                                                                                                                                                                                                                                                                                                                                                                                                                                                                                                                                                                                                                                                                                                                                                                                                                                                                                                                                                                                                                                                                                                                                                                                                                                                                                                                                                                                                                                                                                                                                                                                                                                                                                                                                                                                                                                                                                                                                                                                                                                                                                                                                                                                                                                                                                                                                                                                                                                                                                                                                                                                                                                                                                                                                                                                                                                                                                                                                                                                                                                                                                                                                                                                                                                                                                                                                                                                                                                                                                                                                                                                                                                                                                                                                                                                                                                                                                                                                                                                  | see above                                                                                                              | Lancet Laboratory<br>National Institute for Communicable Diseases of the National Health Laboratory Service                                                                                                                                                                                                                     |  | Amoako DG; Bhiman JN; Everatt J; Ismail A; Kekana D; Mahlangu B; Mnguni A; Mohale T; Ntuli N; Scheepers C; Wolter N                                                                                                                                                                                                                                                                                                                                                                                                                                                                                                                                                                                                                                                                                                          |
| EPI_ISL_9728619                                                                                                                                                                                                                                                                                                                                                                                                                                                                                                                                                                                                                                                                                                                                                                                                                                                                                                                                                                                                                                                                                                                                                                                                                                                                                                                                                                                                                                                                                                                                                                                                                                                                                                                                                                                                                                                                                                                                                                                                                                                                                                                                                                                                                                                                                                                                                                                                                                                                                                                                                                                                                                                                                                                                                                                                                                                                                                                                                                                                                                                                                                                                                                                                                                                                                                                                                                                                                                                                                                                                                                                                                                                                                                                                                                                                                                                                                                                                                                                                                                                                                                                                                                                                                                                                                                                                                                                                                                                                                                                                                                                                                                                                                                                                                                                                                                                                                                                                                                                                                                                                                                                                                                                                                                                                                                                                                                                                                                                                                                                                                                                                                                                                                                                                                                                                                                                                                                                                                                                                                                                                                                                                                                                                                                                                                                                                                                                                                                                                                                                                                                                                                                                                                                                                                                                                                                                                                                                                                                                                                                                                                                                                                                                                                                                                                                                                                                                                                                                                                                                                                                                                                                                                                                                                                                                                                                                                                                                                                                                                                                                                                                                                                                                                                                                                                                                                                                                                                                                                                                                                                                                                                                                                                                                                                                                                                                                                                                                                                                                                                                                                                                                                                                                                                                                                                                                                                                                                                                                                                                                                                                | Landesamt für Verbraucherschutz des Landes Sachsen-Anhalt                                                              | Robert Koch Institute                                                                                                                                                                                                                                                                                                           |  |                                                                                                                                                                                                                                                                                                                                                                                                                                                                                                                                                                                                                                                                                                                                                                                                                              |
| EPI_ISL_9717027                                                                                                                                                                                                                                                                                                                                                                                                                                                                                                                                                                                                                                                                                                                                                                                                                                                                                                                                                                                                                                                                                                                                                                                                                                                                                                                                                                                                                                                                                                                                                                                                                                                                                                                                                                                                                                                                                                                                                                                                                                                                                                                                                                                                                                                                                                                                                                                                                                                                                                                                                                                                                                                                                                                                                                                                                                                                                                                                                                                                                                                                                                                                                                                                                                                                                                                                                                                                                                                                                                                                                                                                                                                                                                                                                                                                                                                                                                                                                                                                                                                                                                                                                                                                                                                                                                                                                                                                                                                                                                                                                                                                                                                                                                                                                                                                                                                                                                                                                                                                                                                                                                                                                                                                                                                                                                                                                                                                                                                                                                                                                                                                                                                                                                                                                                                                                                                                                                                                                                                                                                                                                                                                                                                                                                                                                                                                                                                                                                                                                                                                                                                                                                                                                                                                                                                                                                                                                                                                                                                                                                                                                                                                                                                                                                                                                                                                                                                                                                                                                                                                                                                                                                                                                                                                                                                                                                                                                                                                                                                                                                                                                                                                                                                                                                                                                                                                                                                                                                                                                                                                                                                                                                                                                                                                                                                                                                                                                                                                                                                                                                                                                                                                                                                                                                                                                                                                                                                                                                                                                                                                                                | Landesgesundheitsamt Baden-Württemberg                                                                                 | Robert Koch Institute                                                                                                                                                                                                                                                                                                           |  |                                                                                                                                                                                                                                                                                                                                                                                                                                                                                                                                                                                                                                                                                                                                                                                                                              |
| EPI_ISL_9528360, EPI_ISL_9528361, EPI_ISL_9528362, EPI_ISL_9528363, EPI_ISL_9528364, EPI_ISL_9528366, EPI_ISL_9528369, EPI_ISL_9528370, EPI_ISL_9528371, EPI_ISL_9528372, EPI_ISL_9528373, EPI_ISL_9528374, EPI_ISL_9528375, EPI_ISL_9528376, EPI_ISL_9528377, EPI_ISL_9528379, EPI_ISL_9528380, EPI_ISL_9528385, EPI_ISL_9528386, EPI_ISL_9528387, EPI_ISL_9528389, EPI_ISL_9528390, EPI_ISL_9528392, EPI_ISL_9528393, EPI_ISL_9528394, EPI_ISL_9528395, EPI_ISL_9528396, EPI_ISL_9528397, EPI_ISL_9528398, EPI_ISL_9528399, EPI_ISL_9528400, EPI_ISL_9528402, EPI_ISL_9528403, EPI_ISL_9528405, EPI_ISL_9528407, EPI_ISL_9528409, EPI_ISL_9528410, EPI_ISL_9528411, EPI_ISL_9528414, EPI_ISL_9528415, EPI_ISL_9528416, EPI_ISL_9528417, EPI_ISL_9528419, EPI_ISL_9528421, EPI_ISL_9528422, EPI_ISL_9528424, EPI_ISL_9528425, EPI_ISL_9528426, EPI_ISL_9528427, EPI_ISL_9528428, EPI_ISL_9528429, EPI_ISL_9528430, EPI_ISL_9528431, EPI_ISL_9528432, EPI_ISL_9528433, EPI_ISL_9528434, EPI_ISL_9528435, EPI_ISL_9528436, EPI_ISL_9528437, EPI_ISL_9528438, EPI_ISL_9528439, EPI_ISL_9528440, EPI_ISL_9528441, EPI_ISL_9528442, EPI_ISL_9528443, EPI_ISL_9528444, EPI_ISL_9528445, EPI_ISL_9528446, EPI_ISL_9528447, EPI_ISL_9528448, EPI_ISL_9528449, EPI_ISL_9528450, EPI_ISL_9528451, EPI_ISL_9528452, EPI_ISL_9528453, EPI_ISL_9528454, EPI_ISL_9528455, EPI_ISL_9528456, EPI_ISL_9528457, EPI_ISL_9528458, EPI_ISL_9528459, EPI_ISL_9528460, EPI_ISL_9528461, EPI_ISL_9528462, EPI_ISL_9528463, EPI_ISL_9528464, EPI_ISL_9528465, EPI_ISL_9528466, EPI_ISL_9528467, EPI_ISL_9528468, EPI_ISL_9528469, EPI_ISL_9528470, EPI_ISL_9528471, EPI_ISL_9528472, EPI_ISL_9528473, EPI_ISL_9528474, EPI_ISL_9528475, EPI_ISL_9528476, EPI_ISL_9528477, EPI_ISL_9528478, EPI_ISL_9528479, EPI_ISL_9528480, EPI_ISL_9528481, EPI_ISL_9528482, EPI_ISL_9528483, EPI_ISL_9528484, EPI_ISL_9528485, EPI_ISL_9528486, EPI_ISL_9528487, EPI_ISL_9528488, EPI_ISL_9528489, EPI_ISL_9528490, EPI_ISL_9528491, EPI_ISL_9528492, EPI_ISL_9528493, EPI_ISL_9528494, EPI_ISL_9528495, EPI_ISL_9528496, EPI_ISL_9528497, EPI_ISL_9528498, EPI_ISL_9528499, EPI_ISL_9528500, EPI_ISL_9528501, EPI_ISL_9528502, EPI_ISL_9528503, EPI_ISL_9528504, EPI_ISL_9528505, EPI_ISL_9528506, EPI_ISL_9528507, EPI_ISL_9528508, EPI_ISL_9528509, EPI_ISL_9528510, EPI_ISL_9528511, EPI_ISL_9528512, EPI_ISL_9528513, EPI_ISL_9528514, EPI_ISL_9528515, EPI_ISL_9528516, EPI_ISL_9528517, EPI_ISL_9528518, EPI_ISL_9528519, EPI_ISL_9528520, EPI_ISL_9528521, EPI_ISL_9528522, EPI_ISL_9528523, EPI_ISL_9528524, EPI_ISL_9528525, EPI_ISL_9528526, EPI_ISL_9528527, EPI_ISL_9528528, EPI_ISL_9528529, EPI_ISL_9528530, EPI_ISL_9528531, EPI_ISL_9528532, EPI_ISL_9528533, EPI_ISL_9528534, EPI_ISL_9528535, EPI_ISL_9528536, EPI_ISL_9528537, EPI_ISL_9528538, EPI_ISL_9528539, EPI_ISL_9528540, EPI_ISL_9528541, EPI_ISL_9528542, EPI_ISL_9528543, EPI_ISL_9528544, EPI_ISL_9528545, EPI_ISL_9528546, EPI_ISL_9528547, EPI_ISL_9528548, EPI_ISL_9528549, EPI_ISL_9528550, EPI_ISL_9528551, EPI_ISL_9528552, EPI_ISL_9528553, EPI_ISL_9528554, EPI_ISL_9528555, EPI_ISL_9528556, EPI_ISL_9528557, EPI_ISL_9528558, EPI_ISL_9528559, EPI_ISL_9528560, EPI_ISL_9528561, EPI_ISL_9528562, EPI_ISL_9528563, EPI_ISL_9528564, EPI_ISL_9528565, EPI_ISL_9528566, EPI_ISL_9528567, EPI_ISL_9528568, EPI_ISL_9528569, EPI_ISL_9528570, EPI_ISL_9528571, EPI_ISL_9528572, EPI_ISL_9528573, EPI_ISL_9528574, EPI_ISL_9528575, EPI_ISL_9528576, EPI_ISL_9528577, EPI_ISL_9528578, EPI_ISL_9528579, EPI_ISL_9528580, EPI_ISL_9528581, EPI_ISL_9528582, EPI_ISL_9528583, EPI_ISL_9528584, EPI_ISL_9528585, EPI_ISL_9528586, EPI_ISL_9528587, EPI_ISL_9528588, EPI_ISL_9528589, EPI_ISL_9528590, EPI_ISL_9528591, EPI_ISL_9528592, EPI_ISL_9528593, EPI_ISL_9528594, EPI_ISL_9528595, EPI_ISL_9528596, EPI_ISL_9528597, EPI_ISL_9528598, EPI_ISL_9528599, EPI_ISL_9528600, EPI_ISL_9528601, EPI_ISL_9528602, EPI_ISL_9528603, EPI_ISL_9528604, EPI_ISL_9528605, EPI_ISL_9528606, EPI_ISL_9528607, EPI_ISL_9528608, EPI_ISL_9528609, EPI_ISL_9528610, EPI_ISL_9528611, EPI_ISL_9528612, EPI_ISL_9528613, EPI_ISL_9528614, EPI_ISL_9528615, EPI_ISL_9528616, EPI_ISL_9528617, EPI_ISL_9528618, EPI_ISL_9528619, EPI_ISL_9528620, EPI_ISL_9528621, EPI_ISL_9528622, EPI_ISL_9528623, EPI_ISL_9528624, EPI_ISL_9528625, EPI_ISL_9528626, EPI_ISL_9528627, EPI_ISL_9528628, EPI_ISL_9528629, EPI_ISL_9528630, EPI_ISL_9528631, EPI_ISL_9528632, EPI_ISL_9528633, EPI_ISL_9528634, EPI_ISL_9528635, EPI_ISL_9528636, EPI_ISL_9528637, EPI_ISL_9528638, EPI_ISL_9528639, EPI_ISL_9528640, EPI_ISL_9528641, EPI_ISL_9528642, EPI_ISL_9528643, EPI_ISL_9528644, EPI_ISL_9528645, EPI_ISL_9528646, EPI_ISL_9528647, EPI_ISL_9528648, EPI_ISL_9528649, EPI_ISL_9528650, EPI_ISL_9528651, EPI_ISL_9528652, EPI_ISL_9528653, EPI_ISL_9528654, EPI_ISL_9528655, EPI_ISL_9528656, EPI_ISL_9528657, EPI_ISL_9528658, EPI_ISL_9528659, EPI_ISL_9528660, EPI_ISL_9528661, EPI_ISL_9528662, EPI_ISL_9528663, EPI_ISL_9528664, EPI_ISL_9528665, EPI_ISL_9528666, EPI_ISL_9528667, EPI_ISL_9528668, EPI_ISL_9528669, EPI_ISL_9528670, EPI_ISL_9528671, EPI_ISL_9528672, EPI_ISL_9528673, EPI_ISL_9528674, EPI_ISL_9528675, EPI_ISL_9528676, EPI_ISL_9528677, EPI_ISL_9528678, EPI_ISL_9528679, EPI_ISL_9528680, EPI_ISL_9528681, EPI_ISL_9528682, EPI_ISL_9528683, EPI_ISL_9528684, EPI_ISL_9528685, EPI_ISL_9528686, EPI_ISL_9528687, EPI_ISL_9528688, EPI_ISL_9528689, EPI_ISL_9528690, EPI_ISL_9528691, EPI_ISL_9528692, EPI_ISL_9528693, EPI_ISL_9528694, EPI_ISL_9528695, EPI_ISL_9528696, EPI_ISL_9528697, EPI_ISL_9528698, EPI_ISL_9528699, EPI_ISL_9528700, EPI_ISL_9528701, EPI_ISL_9528702, EPI_ISL_9528703, EPI_ISL_9528704, EPI_ISL_9528705, EPI_ISL_9528706, EPI_ISL_9528707, EPI_ISL_9528708, EPI_ISL_9528709, EPI_ISL_9528710, EPI_ISL_9528711, EPI_ISL_9528712, EPI_ISL_9528713, EPI_ISL_9528714, EPI_ISL_9528715, EPI_ISL_9528716, EPI_ISL_9528717, EPI_ISL_9528718, EPI_ISL_9528719, EPI_ISL_9528720, EPI_ISL_9528721, EPI_ISL_9528722, EPI_ISL_9528723, EPI_ISL_9528724, EPI_ISL_9528725, EPI_ISL_9528726, EPI_ISL_9528727, EPI_ISL_9528728, EPI_ISL_9528729, EPI_ISL_9528730, EPI_ISL_9528731, EPI_ISL_9528732, EPI_ISL_9528733, EPI_ISL_9528734, EPI_ISL_9528735, EPI_ISL_9528736, EPI_ISL_9528737, EPI_ISL_9528738, EPI_ISL_9528739, EPI_ISL_9528740, EPI_ISL_9528741, EPI_ISL_9528742, EPI_ISL_9528743, EPI_ISL_9528744, EPI_ISL_9528745, EPI_ISL_9528746, EPI_ISL_9528747, EPI_ISL_9528748, EPI_ISL_9528749, EPI_ISL_9528750, EPI_ISL_9528751, EPI_ISL_9528752, EPI_ISL_9528753, EPI_ISL_9528754, EPI_ISL_9528755, EPI_ISL_9528756, EPI_ISL_9528757, EPI_ISL_9528758, EPI_ISL_9528759, EPI_ISL_9528760, EPI_ISL_9528761, EPI_ISL_9528762, EPI_ISL_9528763, EPI_ISL_9528764, EPI_ISL_9528765, EPI_ISL_9528766, EPI_ISL_9528767, EPI_ISL_9528768, EPI_ISL_9528769, EPI_ISL_9528770, EPI_ISL_9528771, EPI_ISL_9528772, EPI_ISL_9528773, EPI_ISL_9528774, EPI_ISL_9528775, EPI_ISL_9528776, EPI_ISL_9528777, EPI_ISL_9528778, EPI_ISL_9528779, EPI_ISL_9528780, EPI_ISL_9528781, EPI_ISL_9528782, EPI_ISL_9528783, EPI_ISL_9528784, EPI_ISL_9528785, EPI_ISL_9528786, EPI_ISL_9528787, EPI_ISL_9528788, EPI_ISL_9528789, EPI_ISL_9528790, EPI_ISL_9528791, EPI_ISL_9528792, EPI_ISL_9528793, EPI_ISL_9528794, EPI_ISL_9528795, EPI_ISL_9528796, EPI_ISL_9528797, EPI_ISL_9528798, EPI_ISL_9528799, EPI_ISL_9528800, EPI_ISL_9528801, EPI_ISL_9528802, EPI_ISL_9528803, EPI_ISL_9528804, EPI_ISL_9528805, EPI_ISL_9528806, EPI_ISL_9528807, EPI_ISL_9528808, EPI_ISL_9528809, EPI_ISL_9528810, EPI_ISL_9528811, EPI_ISL_9528812, EPI_ISL_9528813, EPI_ISL_9528814, EPI_ISL_9528815, EPI_ISL_9528816, EPI_ISL_9528817, EPI_ISL_9528818, EPI_ISL_9528819, EPI_ISL_9528820, EPI_ISL_9528821, EPI_ISL_9528822, EPI_ISL_9528823, EPI_ISL_9528824, EPI_ISL_9528825, EPI_ISL_9528826, EPI_ISL_9528827, EPI_ISL_9528828, EPI_ISL_9528829, EPI_ISL_9528830, EPI_ISL_9528831, EPI_ISL_9528832, EPI_ISL_9528833, EPI_ISL_9528834, EPI_ISL_9528835, EPI_ISL_9528836, EPI_ISL_9528837, EPI_ISL_9528838, EPI_ISL_9528839, EPI_ISL_9528840, EPI_ISL_9528841, EPI_ISL_9528842, EPI_ISL_9528843, EPI_ISL_9528844, EPI_ISL_9528845, EPI_ISL_9528846, EPI_ISL_9528847, EPI_ISL_9528848, EPI_ISL_9528849, EPI_ISL_9528850, EPI_ISL_9528851, EPI_ISL_9528852, EPI_ISL_9528853, EPI_ISL_9528854, EPI_ISL_9528855, EPI_ISL_9528856, EPI_ISL_9528857, EPI_ISL_9528858, EPI_ISL_9528859, EPI_ISL_9528860, EPI_ISL_9528861, EPI_ISL_9528862, EPI_ISL_9528863, EPI_ISL_9528864, EPI_ISL_9528865, EPI_ISL_9528866, EPI_ISL_9528867, EPI_ISL_9528868, EPI_ISL_9528869, EPI_ISL_9528870, EPI_ISL_9528871, EPI_ISL_9528872, EPI_ISL_9528873, EPI_ISL_9528874, EPI_ISL_9528875, EPI_ISL_9528876, EPI_ISL_9528877, EPI_ISL_9528878, EPI_ISL_9528879, EPI_ISL_9528880, EPI_ISL_9528881, EPI_ISL_9528882, EPI_ISL_9528883, EPI_ISL_9528884, EPI_ISL_9528885, EPI_ISL_9528886, EPI_ISL_9528887, EPI_ISL_9528888, EPI_ISL_9528889, EPI_ISL_9528890, EPI_ISL_9528891, EPI_ISL_9528892, EPI_ISL_9528893, EPI_ISL_9528894, EPI_ISL_9528895, EPI_ISL_9528896, EPI_ISL_9528897, EPI_ISL_9528898, EPI_ISL_9528899, EPI_ISL_9528900, EPI_ISL_9528901, EPI_ISL_9528902, EPI_ISL_9528903, EPI_ISL_9528904, EPI_ISL_9528905, EPI_ISL_9528906, EPI_ISL_9528907, EPI_ISL_9528908, EPI_ISL_9528909, EPI_ISL_9528910, EPI_ISL_9528911, EPI_ISL_9528912, EPI_ISL_9528913, EPI_ISL_9528914, EPI_ISL_9528915, EPI_ISL_9528916, EPI_ISL_9528917, EPI_ISL_9528918, EPI_ISL_9528919, E |                                                                                                                        |                                                                                                                                                                                                                                                                                                                                 |  |                                                                                                                                                                                                                                                                                                                                                                                                                                                                                                                                                                                                                                                                                                                                                                                                                              |



|                                                                                                                                                                                                                                                                                                                                                                                                                                                                                                                                                                                                                                                                                                                                                                                                                                                                                                                                                                                                                                                                                                                                                                                                                                                                                                                                                             |                                                                                 |                                                                                                                                                                                           |                                                              |                                                                                                                                                                                                                                                                                                                                                                                                                                                                                                                                                                                                                                                                                                        |                                                                                                                      |
|-------------------------------------------------------------------------------------------------------------------------------------------------------------------------------------------------------------------------------------------------------------------------------------------------------------------------------------------------------------------------------------------------------------------------------------------------------------------------------------------------------------------------------------------------------------------------------------------------------------------------------------------------------------------------------------------------------------------------------------------------------------------------------------------------------------------------------------------------------------------------------------------------------------------------------------------------------------------------------------------------------------------------------------------------------------------------------------------------------------------------------------------------------------------------------------------------------------------------------------------------------------------------------------------------------------------------------------------------------------|---------------------------------------------------------------------------------|-------------------------------------------------------------------------------------------------------------------------------------------------------------------------------------------|--------------------------------------------------------------|--------------------------------------------------------------------------------------------------------------------------------------------------------------------------------------------------------------------------------------------------------------------------------------------------------------------------------------------------------------------------------------------------------------------------------------------------------------------------------------------------------------------------------------------------------------------------------------------------------------------------------------------------------------------------------------------------------|----------------------------------------------------------------------------------------------------------------------|
| EPI_ISL_9726092                                                                                                                                                                                                                                                                                                                                                                                                                                                                                                                                                                                                                                                                                                                                                                                                                                                                                                                                                                                                                                                                                                                                                                                                                                                                                                                                             |                                                                                 |                                                                                                                                                                                           |                                                              |                                                                                                                                                                                                                                                                                                                                                                                                                                                                                                                                                                                                                                                                                                        |                                                                                                                      |
| EPI_ISL_9525537,<br>EPI_ISL_9525538,<br>EPI_ISL_9525539,<br>EPI_ISL_9525540,<br>EPI_ISL_9525541                                                                                                                                                                                                                                                                                                                                                                                                                                                                                                                                                                                                                                                                                                                                                                                                                                                                                                                                                                                                                                                                                                                                                                                                                                                             | Mako Medical                                                                    | Centers for Disease Control and Prevention Division of Viral Diseases, Pathogen Discovery                                                                                                 |                                                              | Benjamin Rambo-Martin; Christopher Gulwick; Clinton Paden; Dakota Howard; Dhvani Batra; Duncan MacCannell; Erisa Sula; Jason Caravas; Kristine Lacey; Lauren Moon; Matthew Schmerer; Matthew Tugwell; Peter Cook; Scott Sammons; Shatavia Morrison; Tymeckia Kendall; Victoria Caban Figueroa; Yvette Unoarumi                                                                                                                                                                                                                                                                                                                                                                                         |                                                                                                                      |
| EPI_ISL_9738897                                                                                                                                                                                                                                                                                                                                                                                                                                                                                                                                                                                                                                                                                                                                                                                                                                                                                                                                                                                                                                                                                                                                                                                                                                                                                                                                             | Maldives Police Services Lab                                                    | Maldives Police Services Lab                                                                                                                                                              |                                                              | D. Fathmath Nazla Rafeeque; Dr. Ibrahim Afzal; Mr. Ibrahim Nishan Ahmed; Ms. Aishath Shuhudha; Ms. Aminath Shazleena Abdul Rahman; Ms. Soafy Mohamed                                                                                                                                                                                                                                                                                                                                                                                                                                                                                                                                                   |                                                                                                                      |
| EPI_ISL_9718734                                                                                                                                                                                                                                                                                                                                                                                                                                                                                                                                                                                                                                                                                                                                                                                                                                                                                                                                                                                                                                                                                                                                                                                                                                                                                                                                             | Medizinische Laboratorien Düsseldorf                                            | Robert Koch Institute                                                                                                                                                                     |                                                              |                                                                                                                                                                                                                                                                                                                                                                                                                                                                                                                                                                                                                                                                                                        |                                                                                                                      |
| EPI_ISL_9687804,<br>EPI_ISL_9687903,<br>EPI_ISL_9687980                                                                                                                                                                                                                                                                                                                                                                                                                                                                                                                                                                                                                                                                                                                                                                                                                                                                                                                                                                                                                                                                                                                                                                                                                                                                                                     | Medyczne Laboratorium Diagnostyczne Medrex                                      | 1. Academic Center for Pathomorphological and Genetic-Molecular Diagnostics Ltd, Bialystok, Poland 2. National Institute of Public Health - National Institute of Hygiene, Warsaw, Poland |                                                              | Anetta Sulewska; Jacek Nikliński; Janusz Dzieciol; Joanna Kiśluk; Katarzyna Zacharczuk; Konrad Raczkowski; Magdalena Nowakowska; Małgorzata Sadkowska-Todys; Piotr Karabowicz; Piotr Majewski; Przemysław Biecek; Joanna Reszeć; Radosław Charkiewicz; Tomasz Kolkowicz                                                                                                                                                                                                                                                                                                                                                                                                                                |                                                                                                                      |
| EPI_ISL_9482548                                                                                                                                                                                                                                                                                                                                                                                                                                                                                                                                                                                                                                                                                                                                                                                                                                                                                                                                                                                                                                                                                                                                                                                                                                                                                                                                             | Medyczne Laboratorium Diagnostyczne VITO-MED Sp. z o. o.                        | Wojewódzka Stacja Sanitarno-Epidemiologiczna w Katowicach                                                                                                                                 |                                                              | Adrian Miara; Agata Chajda; Beata Rozwadowska; Elżbieta Bartkowiak; Marta Albertyńska                                                                                                                                                                                                                                                                                                                                                                                                                                                                                                                                                                                                                  |                                                                                                                      |
| EPI_ISL_9274147                                                                                                                                                                                                                                                                                                                                                                                                                                                                                                                                                                                                                                                                                                                                                                                                                                                                                                                                                                                                                                                                                                                                                                                                                                                                                                                                             | Medyczne Laboratorium Diagnostyczne, Szpital Miejski nr 4 w Gliwicach Sp. z o.o | Wojewódzka Stacja Sanitarno-Epidemiologiczna w Katowicach                                                                                                                                 |                                                              | Adrian Miara; Agata Chajda; Beata Rozwadowska; Elżbieta Bartkowiak; Marta Albertyńska                                                                                                                                                                                                                                                                                                                                                                                                                                                                                                                                                                                                                  |                                                                                                                      |
| EPI_ISL_9748172                                                                                                                                                                                                                                                                                                                                                                                                                                                                                                                                                                                                                                                                                                                                                                                                                                                                                                                                                                                                                                                                                                                                                                                                                                                                                                                                             | Michigan Department of Health and Human Services, Bureau of Laboratories        | Michigan Department of Health and Human Services, Bureau of Laboratories                                                                                                                  |                                                              |                                                                                                                                                                                                                                                                                                                                                                                                                                                                                                                                                                                                                                                                                                        | Blankenship HM; Riner D; Soehhlen MK                                                                                 |
| EPI_ISL_9303163,<br>EPI_ISL_9303164,<br>EPI_ISL_9767677,<br>EPI_ISL_9767678,<br>EPI_ISL_9767688,<br>EPI_ISL_9767878                                                                                                                                                                                                                                                                                                                                                                                                                                                                                                                                                                                                                                                                                                                                                                                                                                                                                                                                                                                                                                                                                                                                                                                                                                         | Microbiological Diagnostic Unit - Public Health Laboratory (MDU-PHL)            | Microbiological Diagnostic Unit - Public Health Laboratory (MDU-PHL)                                                                                                                      |                                                              |                                                                                                                                                                                                                                                                                                                                                                                                                                                                                                                                                                                                                                                                                                        | Horan, K.; N.L.; Seemann, T.; Sherry                                                                                 |
| EPI_ISL_9500556                                                                                                                                                                                                                                                                                                                                                                                                                                                                                                                                                                                                                                                                                                                                                                                                                                                                                                                                                                                                                                                                                                                                                                                                                                                                                                                                             | Microbiology Department - University Hospital Brussel                           | Microbiology Department - University Hospital Brussel                                                                                                                                     |                                                              |                                                                                                                                                                                                                                                                                                                                                                                                                                                                                                                                                                                                                                                                                                        | Florence Crombé; Oriane Soetens; Thomas Demuyser                                                                     |
| EPI_ISL_9738268                                                                                                                                                                                                                                                                                                                                                                                                                                                                                                                                                                                                                                                                                                                                                                                                                                                                                                                                                                                                                                                                                                                                                                                                                                                                                                                                             | Microbiology Department, University Hospital Donostia                           | Microbiology Department, University Hospital Donostia                                                                                                                                     |                                                              |                                                                                                                                                                                                                                                                                                                                                                                                                                                                                                                                                                                                                                                                                                        | Cilla G.; Gomez M; Marimon JM; Martin-Peñaranda T; Montes M; Piñeiro L; Sorrairan A                                  |
| EPI_ISL_9434101                                                                                                                                                                                                                                                                                                                                                                                                                                                                                                                                                                                                                                                                                                                                                                                                                                                                                                                                                                                                                                                                                                                                                                                                                                                                                                                                             | Middlemore Hospital                                                             | Institute of Environmental Science and Research (ESR)                                                                                                                                     |                                                              | Anja Werno; Antje van der Linden; Arlo Upton; Chris Mansell; Clare Gebbie; David Hammer; Dhanisha Patel; Dragana Drinkovic; Erasmus Smit; Gary McAuliffe; Hana Sofia Andersson; Hermes Perez; James Ussher; Jill Sherwood; Jing Wang; Joep de Lig; Josh Freeman; Julia Howard; Juliet Elvy; Lauren Jelly; Mary DeAlmeida; Matt Blakiston; Matt Storey; Matthew Rogers; Max Bloomfield; Michael Addie; Michelle Balm; Muhammad Faisal; Nikki Freed; Olin Silander; Olivia Stroeven; Rachel Boyle; Sally Roberts; SallyAnn Harbison; Sarah Cockerton; Sarah Jefferies; Sharmini Muttaiyah; Susan Morpeth; Susan Taylor; Timothy Blackmore; Vani Sathyendran; Veronica Playle; Virginia Hope; Xiaoyun Ren |                                                                                                                      |
| EPI_ISL_9470223,<br>EPI_ISL_9480964                                                                                                                                                                                                                                                                                                                                                                                                                                                                                                                                                                                                                                                                                                                                                                                                                                                                                                                                                                                                                                                                                                                                                                                                                                                                                                                         | Minnesota Department of Health, Public Health Laboratory                        | Minnesota Department of Health, Public Health Laboratory                                                                                                                                  |                                                              |                                                                                                                                                                                                                                                                                                                                                                                                                                                                                                                                                                                                                                                                                                        | Alyssa Mondelli; Elizabeth Horn; Haejin Hwang; Jacob Garfin; Kelly Pung; Matt Plumb; Sarah Namugenyi; and Xiong Wang |
| EPI_ISL_9406020                                                                                                                                                                                                                                                                                                                                                                                                                                                                                                                                                                                                                                                                                                                                                                                                                                                                                                                                                                                                                                                                                                                                                                                                                                                                                                                                             | Molecular Biology Laboratory, Vidant Medical Center                             | Brody Integrative Genomics Core, East Carolina University                                                                                                                                 |                                                              |                                                                                                                                                                                                                                                                                                                                                                                                                                                                                                                                                                                                                                                                                                        | Changhong Yin; Heather Duncan; John T. Fallon; Kimberly P. Briley; Weihua Huang                                      |
| EPI_ISL_9411766, EPI_ISL_9690056, EPI_ISL_9690144, EPI_ISL_9690417, EPI_ISL_9690444, EPI_ISL_9690489, EPI_ISL_9690628, EPI_ISL_9690832, EPI_ISL_9690954, EPI_ISL_9691210, EPI_ISL_9691380, EPI_ISL_9691951, EPI_ISL_9692009, EPI_ISL_9692345, EPI_ISL_9693574, EPI_ISL_9694077, EPI_ISL_9694202, EPI_ISL_9695207                                                                                                                                                                                                                                                                                                                                                                                                                                                                                                                                                                                                                                                                                                                                                                                                                                                                                                                                                                                                                                            | see above                                                                       | Molekylær Medicinsk Afdeling, Aarhus University Hospital, Aarhus, Denmark                                                                                                                 | Statens Serum Institut Bioinformatics and Microbial Genomics |                                                                                                                                                                                                                                                                                                                                                                                                                                                                                                                                                                                                                                                                                                        | Danish Covid-19 Genome Consortium                                                                                    |
| EPI_ISL_9775226,<br>EPI_ISL_9775227                                                                                                                                                                                                                                                                                                                                                                                                                                                                                                                                                                                                                                                                                                                                                                                                                                                                                                                                                                                                                                                                                                                                                                                                                                                                                                                         | NHL Municipal Medical College, Ahmedabad (SVP)                                  | Gujarat Biotechnology Research Centre                                                                                                                                                     |                                                              | Akhilesh Modi; Apurvashin Puvar; Bhadreshsinh Gohil; Chaitanya Joshi; Disha Vora; Janvi Raval; Jaykumar Rangani; Jayshree Pethani; Madhvi Joshi; Nimesh Patel; Nitin Savaliya; NitinShukla; Priyank Chavda; Ramesh Pandit; Roshani Mishra; Sonal Sharma; Tasnim Trivedi; Zarna Patel                                                                                                                                                                                                                                                                                                                                                                                                                   |                                                                                                                      |
| EPI_ISL_9595627                                                                                                                                                                                                                                                                                                                                                                                                                                                                                                                                                                                                                                                                                                                                                                                                                                                                                                                                                                                                                                                                                                                                                                                                                                                                                                                                             | NJDOH, Public Health and Environmental Laboratories                             | New Jersey Public Health and Environmental Laboratories (NJ PHEL)                                                                                                                         |                                                              | Byeong Jeong; Chelsea San Filippo; Dana Woell; Lindsey Bodnar; Maria-Magdalene Pugliese; Mohammad M. Ali; Shiv K. Verma                                                                                                                                                                                                                                                                                                                                                                                                                                                                                                                                                                                |                                                                                                                      |
| EPI_ISL_9440901                                                                                                                                                                                                                                                                                                                                                                                                                                                                                                                                                                                                                                                                                                                                                                                                                                                                                                                                                                                                                                                                                                                                                                                                                                                                                                                                             | NYU Langone Health                                                              | Departments of Pathology and Medicine, New York University School of Medicine                                                                                                             |                                                              | Adriana Heguy; Christian Marier; Dacia Dimartino; Emily Guzman; Gael Westby; Guiqing Wang; Paul Zappile; Peter Meyn; Sitharam Ramaswami; Yutong Zhang                                                                                                                                                                                                                                                                                                                                                                                                                                                                                                                                                  |                                                                                                                      |
| EPI_ISL_9771193                                                                                                                                                                                                                                                                                                                                                                                                                                                                                                                                                                                                                                                                                                                                                                                                                                                                                                                                                                                                                                                                                                                                                                                                                                                                                                                                             | NZOZ MEDITEST Diagnostyka Medyczna Jacek Podolski                               | Wojewodzka Stacja Sanitarno-Epidemiologiczna w Gorzowie Wielkopolskim                                                                                                                     |                                                              | Elzbieta Justynska; Klaudia Kobenzda-Wlodarczak; Patrycja Faberska; Patrycja Rakowska and Marek Margol; Renata Siegel                                                                                                                                                                                                                                                                                                                                                                                                                                                                                                                                                                                  |                                                                                                                      |
| EPI_ISL_9506324                                                                                                                                                                                                                                                                                                                                                                                                                                                                                                                                                                                                                                                                                                                                                                                                                                                                                                                                                                                                                                                                                                                                                                                                                                                                                                                                             | National Institute of Health Research and Development                           | National Quality Control Laboratory of Drug and Food                                                                                                                                      |                                                              | Diana Tri Wulan; Hana Aparsi Pawestri; Marcella Sutanata; Sri Utaminingsih; Vivi Setiawaty                                                                                                                                                                                                                                                                                                                                                                                                                                                                                                                                                                                                             |                                                                                                                      |
| EPI_ISL_9438107, EPI_ISL_9438108, EPI_ISL_9438109, EPI_ISL_9438110, EPI_ISL_9438111, EPI_ISL_9438112, EPI_ISL_9438113, EPI_ISL_9438114, EPI_ISL_9438115, EPI_ISL_9438116, EPI_ISL_9438117, EPI_ISL_9438118, EPI_ISL_9438119, EPI_ISL_9438120, EPI_ISL_9438121, EPI_ISL_9438122, EPI_ISL_9438123, EPI_ISL_9438124, EPI_ISL_9438125, EPI_ISL_9438126, EPI_ISL_9438127, EPI_ISL_9438128, EPI_ISL_9438129, EPI_ISL_9438130, EPI_ISL_9438131, EPI_ISL_9438132, EPI_ISL_9438133, EPI_ISL_9438134, EPI_ISL_9438135, EPI_ISL_9438136, EPI_ISL_9438137, EPI_ISL_9438138, EPI_ISL_9438139, EPI_ISL_9438140, EPI_ISL_9438141, EPI_ISL_9438142, EPI_ISL_9438143, EPI_ISL_9438144, EPI_ISL_9438145, EPI_ISL_9438146, EPI_ISL_9438147, EPI_ISL_9438148, EPI_ISL_9438149, EPI_ISL_9438150, EPI_ISL_9438151, EPI_ISL_9438152, EPI_ISL_9438154, EPI_ISL_9438160, EPI_ISL_9438164, EPI_ISL_9438167, EPI_ISL_9438172, EPI_ISL_9438176, EPI_ISL_9438180, EPI_ISL_9438182, EPI_ISL_9438183, EPI_ISL_9438185, EPI_ISL_9438186, EPI_ISL_9438187, EPI_ISL_9438189, EPI_ISL_9438190, EPI_ISL_9438191, EPI_ISL_9438192, EPI_ISL_9438193, EPI_ISL_9438194, EPI_ISL_9438195, EPI_ISL_9438196, EPI_ISL_9438197, EPI_ISL_9438198, EPI_ISL_9438199, EPI_ISL_9438200, EPI_ISL_9438201, EPI_ISL_9438202, EPI_ISL_9438203, EPI_ISL_9438204, EPI_ISL_9438205, EPI_ISL_9438206, EPI_ISL_9596931 | see above                                                                       | National Public Health Laboratory, National Centre for Infectious Diseases                                                                                                                |                                                              | Benny Yeo; Grace Ngan; Lin Cui; Raymond Tzer Pin Lin; Royce Ang; Samuel Loo; Yichen Ding; Zhenyang Zhou                                                                                                                                                                                                                                                                                                                                                                                                                                                                                                                                                                                                |                                                                                                                      |
| EPI_ISL_9658981                                                                                                                                                                                                                                                                                                                                                                                                                                                                                                                                                                                                                                                                                                                                                                                                                                                                                                                                                                                                                                                                                                                                                                                                                                                                                                                                             | Nemocnice Havlíckuv Brod                                                        | University Hospital Brno, CMBG                                                                                                                                                            |                                                              |                                                                                                                                                                                                                                                                                                                                                                                                                                                                                                                                                                                                                                                                                                        | Bezdicek Matej; Dolejska Monika; Kristyna Dufkova; Lengerova Martina; Svaton Jan                                     |
| EPI_ISL_9658955                                                                                                                                                                                                                                                                                                                                                                                                                                                                                                                                                                                                                                                                                                                                                                                                                                                                                                                                                                                                                                                                                                                                                                                                                                                                                                                                             | Nemocnice Pelhřimov                                                             | University Hospital Brno, CMBG                                                                                                                                                            |                                                              |                                                                                                                                                                                                                                                                                                                                                                                                                                                                                                                                                                                                                                                                                                        | Bezdicek Matej; Dolejska Monika; Kristyna Dufkova; Lengerova Martina; Svaton Jan                                     |
| EPI_ISL_9533157                                                                                                                                                                                                                                                                                                                                                                                                                                                                                                                                                                                                                                                                                                                                                                                                                                                                                                                                                                                                                                                                                                                                                                                                                                                                                                                                             | Nevada State Public Health Laboratory                                           | Nevada State Public Health Laboratory                                                                                                                                                     |                                                              |                                                                                                                                                                                                                                                                                                                                                                                                                                                                                                                                                                                                                                                                                                        | Andrew Gorzalski; Lynette Gumbleton; Mark Pandori                                                                    |
| EPI_ISL_9352155                                                                                                                                                                                                                                                                                                                                                                                                                                                                                                                                                                                                                                                                                                                                                                                                                                                                                                                                                                                                                                                                                                                                                                                                                                                                                                                                             | North Dakota Department of Health, Public Health Laboratory                     | North Dakota Department of Health, Public Health Laboratory                                                                                                                               |                                                              |                                                                                                                                                                                                                                                                                                                                                                                                                                                                                                                                                                                                                                                                                                        | Lisa Wingerter                                                                                                       |
| EPI_ISL_9209167,<br>EPI_ISL_9209935,<br>EPI_ISL_9434167,<br>EPI_ISL_9636491,<br>EPI_ISL_9636585,<br>EPI_ISL_9636719                                                                                                                                                                                                                                                                                                                                                                                                                                                                                                                                                                                                                                                                                                                                                                                                                                                                                                                                                                                                                                                                                                                                                                                                                                         | North Shore Hospital                                                            | Institute of Environmental Science and Research (ESR)                                                                                                                                     |                                                              | Anja Werno; Antje van der Linden; Arlo Upton; Chris Mansell; Clare Gebbie; David Hammer; Dhanisha Patel; Dragana Drinkovic; Erasmus Smit; Gary McAuliffe; Hana Sofia Andersson; Hermes Perez; James Ussher; Jill Sherwood; Jing Wang; Joep de Lig; Josh Freeman; Julia Howard; Juliet Elvy; Lauren Jelly; Mary DeAlmeida; Matt Blakiston; Matt Storey; Matthew Rogers; Max Bloomfield; Michael Addie; Michelle Balm; Muhammad Faisal; Nikki Freed; Olin Silander; Olivia Stroeven; Rachel Boyle; Sally Roberts; SallyAnn Harbison; Sarah Cockerton; Sarah Jefferies; Sharmini Muttaiyah; Susan Morpeth; Susan Taylor; Timothy Blackmore; Vani Sathyendran; Veronica Playle; Virginia Hope; Xiaoyun Ren |                                                                                                                      |
| EPI_ISL_9696281                                                                                                                                                                                                                                                                                                                                                                                                                                                                                                                                                                                                                                                                                                                                                                                                                                                                                                                                                                                                                                                                                                                                                                                                                                                                                                                                             | Northstar Pathology Laboratory, Ahmedabad                                       | Gujarat Biotechnology Research Centre                                                                                                                                                     |                                                              | Akhilesh Modi; Apurvashin Puvar; Bhadreshsinh Gohil; Chaitanya Joshi; Disha Vora; Janvi Raval; Jaykumar Rangani; Kanupriya; Madhvi Joshi; Nimesh Patel; Nitin Savaliya; NitinShukla; Priyank Chavda; Ramesh Pandit; Roshani Mishra; Sonal Sharma; Tasnim Trivedi; Zarna Patel                                                                                                                                                                                                                                                                                                                                                                                                                          |                                                                                                                      |
| EPI_ISL_9729699, EPI_ISL_9730098, EPI_ISL_9730103, EPI_ISL_9730118, EPI_ISL_9731462, EPI_ISL_9732374, EPI_ISL_9732404, EPI_ISL_9732440, EPI_ISL_9732489, EPI_ISL_9732528, EPI_ISL_9732550, EPI_ISL_9812670, EPI_ISL_9812690, EPI_ISL_9812698, EPI_ISL_9812750, EPI_ISL_9812910, EPI_ISL_9813086, EPI_ISL_9813125, EPI_ISL_9813189, EPI_ISL_9813205, EPI_ISL_9813343, EPI_ISL_9813403, EPI_ISL_9813407, EPI_ISL_9813680                                                                                                                                                                                                                                                                                                                                                                                                                                                                                                                                                                                                                                                                                                                                                                                                                                                                                                                                      | see above                                                                       | COVID-19 Genomics UK (COG-UK) Consortium                                                                                                                                                  |                                                              | Andrew Nelson; Brendan Payne; Clive Graham; Darren L Smith; Debra Padgett; Edward Barton; Emma Swindells; Garren Scott; Gary Black; Gary Eltringham; Giles S Holt; Greg R Young; Jane Greenaway; Jennifer Collins; John Allan; Joshua Loh; Lynn Dover; Matthew Bashton; Mohammad A Tariq; Paul Baker; Sarah Essex; Steve Liggett; Wen C Yew; Yusrî Taha                                                                                                                                                                                                                                                                                                                                                |                                                                                                                      |
| EPI_ISL_9513491                                                                                                                                                                                                                                                                                                                                                                                                                                                                                                                                                                                                                                                                                                                                                                                                                                                                                                                                                                                                                                                                                                                                                                                                                                                                                                                                             | Northwestern Memorial Hospital                                                  | Northwestern University - Center for Pathogen Genomics and Microbial Evolution                                                                                                            |                                                              | Chad J. Achenbach; Chao Qi; Egon A. Ozer; Judd F. Hultquist; Lacy M. Simons; Lawrence J. Jennings; Michael G. Ison; Ramon Lorenzo-Redondo; Taylor J. Dean                                                                                                                                                                                                                                                                                                                                                                                                                                                                                                                                              |                                                                                                                      |
| EPI_ISL_9658887                                                                                                                                                                                                                                                                                                                                                                                                                                                                                                                                                                                                                                                                                                                                                                                                                                                                                                                                                                                                                                                                                                                                                                                                                                                                                                                                             | OKMI                                                                            | University Hospital Brno, CMBG                                                                                                                                                            |                                                              |                                                                                                                                                                                                                                                                                                                                                                                                                                                                                                                                                                                                                                                                                                        | Bezdicek Matej; Dolejska Monika; Kristyna Dufkova; Lengerova Martina; Svaton Jan                                     |
| EPI_ISL_9693130,<br>EPI_ISL_9693136                                                                                                                                                                                                                                                                                                                                                                                                                                                                                                                                                                                                                                                                                                                                                                                                                                                                                                                                                                                                                                                                                                                                                                                                                                                                                                                         | Orebro University Hospital, Dept. Laboratory Medicine, Clinical Microbiology    | Orebro University Hospital                                                                                                                                                                |                                                              |                                                                                                                                                                                                                                                                                                                                                                                                                                                                                                                                                                                                                                                                                                        | Sundqvist M et al                                                                                                    |
| EPI_ISL_9551505,<br>EPI_ISL_9551506                                                                                                                                                                                                                                                                                                                                                                                                                                                                                                                                                                                                                                                                                                                                                                                                                                                                                                                                                                                                                                                                                                                                                                                                                                                                                                                         | Oregon State Public Health Laboratory                                           | Oregon State Public Health Laboratory                                                                                                                                                     |                                                              |                                                                                                                                                                                                                                                                                                                                                                                                                                                                                                                                                                                                                                                                                                        | Eugene Yeboah; John Fontana and Shane Sevey; Laura Tsakanaridis; Macey Henning; Rafia Razaque; Vanda Makris          |
| EPI_ISL_9742825, EPI_ISL_9746810, EPI_ISL_9747059, EPI_ISL_9747603, EPI_ISL_9748232, EPI_ISL_9748299, EPI_ISL_9748460, EPI_ISL_9748642, EPI_ISL_9749187, EPI_ISL_9749272, EPI_ISL_9749425, EPI_ISL_9749481, EPI_ISL_9749487, EPI_ISL_9749902, EPI_ISL_9749928, EPI_ISL_9749932, EPI_ISL_9749947, EPI_ISL_9750003, EPI_ISL_9750011, EPI_ISL_9750191, EPI_ISL_9750348, EPI_ISL_9750379, EPI_ISL_9750408, EPI_ISL_9815068, EPI_ISL_9815107, EPI_ISL_9815129, EPI_ISL_9815372, EPI_ISL_9815396, EPI_ISL_9815665, EPI_ISL_9815670, EPI_ISL_9815683, EPI_ISL_9815707, EPI_ISL_9815828, EPI_ISL_9815848, EPI_ISL_9815853, EPI_ISL_9815867, EPI_ISL_9815877, EPI_ISL_9815943, EPI_ISL_9815957, EPI_ISL_9816568, EPI_ISL_9816583, EPI_ISL_9816606, EPI_ISL_9816609, EPI_ISL_9816619, EPI_ISL_9816665, EPI_ISL_9816667, EPI_ISL_9816698, EPI_ISL_9816706, EPI_ISL_9816708, EPI_ISL_9816723, EPI_ISL_9816759, EPI_ISL_9816784, EPI_ISL_9816787, EPI_ISL_9816797, EPI_ISL_9816823, EPI_ISL_9816826, EPI_ISL_9816834, EPI_ISL_9816858, EPI_ISL_9816870, EPI_ISL_9816916, EPI_ISL_9816922, EPI_ISL_9816923, EPI_ISL_9816940, EPI_ISL_9816966, EPI_ISL_9817128                                                                                                                                                                                                             | see above                                                                       | Public Health Wales Microbiology Cardiff Wales Specialist Virology Centre                                                                                                                 |                                                              | Alec Birchley; Alexander Adams; Amy Gaskin; Angela Marchbank; Bree Gatica-Wilcox; Catherine Moore; Jason Coombes; Joanne Watkins; Joel Southgate; Johnathan Evans; Laura Gifford; Lauren Gilbert; Lee Graham; Malorie Perry; Matthew Bull; Nicole Pacchiarini; Sally Corden; Sara Kuuziense-Summerhayes; Sara Rey; Sarah Taylor; Simon Cottrell; Sophie Jones; Tom Connor                                                                                                                                                                                                                                                                                                                              |                                                                                                                      |
| EPI_ISL_9480516, EPI_ISL_9480519, EPI_ISL_9480520, EPI_ISL_9480521, EPI_ISL_9480523, EPI_ISL_9480528, EPI_ISL_9480529, EPI_ISL_9480530, EPI_ISL_9480532, EPI_ISL_9480534, EPI_ISL_9480552, EPI_ISL_9480557, EPI_ISL_9480571, EPI_ISL_9681664, EPI_ISL_9681672, EPI_ISL_9681674, EPI_ISL_9681680, EPI_ISL_9681683, EPI_ISL_9681685, EPI_ISL_9681688, EPI_ISL_9681700, EPI_ISL_9681701, EPI_ISL_9747191, EPI_ISL_9747192, EPI_ISL_9747193                                                                                                                                                                                                                                                                                                                                                                                                                                                                                                                                                                                                                                                                                                                                                                                                                                                                                                                     | see above                                                                       | Norwegian Institute of Public Health, Department of Virology                                                                                                                              |                                                              | Arvind Yegambaram Meenakshi Sundaram; Cathrine Fladeby; Garcia Llorente Ignacio; Gregor D. Gillfillan; Hilde Elshaug; Hilde Volla; Jon Bråte; Kamilla Heddeland Instefjord; Karoline Bragstad; Kathrine Stene-Johansen; Line Victoria Moen; Lise Andresen; Mariann Nilsen; Mona Holberg-Petersen; Olav Hunnings; Pedersen Benedikte Neven; Pål Marius Bjørnstad; Rasmus Riis Kopperud; Teodora Plamenova Ribarska                                                                                                                                                                                                                                                                                      |                                                                                                                      |
| EPI_ISL_9622049,<br>EPI_ISL_9622054                                                                                                                                                                                                                                                                                                                                                                                                                                                                                                                                                                                                                                                                                                                                                                                                                                                                                                                                                                                                                                                                                                                                                                                                                                                                                                                         | PAMM                                                                            | Laboratory of Medical Microbiology and Pathology, PAMM                                                                                                                                    |                                                              |                                                                                                                                                                                                                                                                                                                                                                                                                                                                                                                                                                                                                                                                                                        | Christel van Herk; Inge Briels; Jeroen van de Bovenkamp; Maaike Broeders; Pleunie van Alphen                         |
| EPI_ISL_9275756,<br>EPI_ISL_9549414                                                                                                                                                                                                                                                                                                                                                                                                                                                                                                                                                                                                                                                                                                                                                                                                                                                                                                                                                                                                                                                                                                                                                                                                                                                                                                                         | PPHC-Purdue University                                                          | Animal Disease Diagnostic Laboratory, Purdue University College of Veterinary Medicine                                                                                                    |                                                              |                                                                                                                                                                                                                                                                                                                                                                                                                                                                                                                                                                                                                                                                                                        | John Kattoor; Rebecca P Wilkes                                                                                       |
| EPI_ISL_9659592, EPI_ISL_9659600, EPI_ISL_9659646, EPI_ISL_9659692, EPI_ISL_9659934, EPI_ISL_9659938, EPI_ISL_9660759, EPI_ISL_9660763, EPI_ISL_9664319                                                                                                                                                                                                                                                                                                                                                                                                                                                                                                                                                                                                                                                                                                                                                                                                                                                                                                                                                                                                                                                                                                                                                                                                     | see above                                                                       | Pandemic Response Lab, NYC                                                                                                                                                                | Pandemic Response Lab, R&D                                   | Alex Carpio; Cybill del Castillo; Haiping Hao; Isabel Fernandez Escapa; Jon Laurent; Melissa Hopkins; Michael Hammerling; Simran Chhabria; Simran Gupta; Sol Rey; Steven Chase; Tiara Rivera; William Ward                                                                                                                                                                                                                                                                                                                                                                                                                                                                                             |                                                                                                                      |

|                                                                                                                                                                                                                                                                                                                                                                                                                                                                                                                                                                                                                                                                                                                                                                                                                                                                                                                                                                                                                                                                                                                                                                                                                                                                                                                                                                                                                                                                                                                                                                                                                                                                                                                                                                                                                                                                                                                                                                                                                                                                                                                                                                                                                                                                                                                                                                                                                                                           |                                                                                                                                                                                                                                                 |                                                                                                                                                                                                                                                                                                                                                                                                                                                                                     |                                                                                                                                                                                                                                                                                                                                                                                                                             |
|-----------------------------------------------------------------------------------------------------------------------------------------------------------------------------------------------------------------------------------------------------------------------------------------------------------------------------------------------------------------------------------------------------------------------------------------------------------------------------------------------------------------------------------------------------------------------------------------------------------------------------------------------------------------------------------------------------------------------------------------------------------------------------------------------------------------------------------------------------------------------------------------------------------------------------------------------------------------------------------------------------------------------------------------------------------------------------------------------------------------------------------------------------------------------------------------------------------------------------------------------------------------------------------------------------------------------------------------------------------------------------------------------------------------------------------------------------------------------------------------------------------------------------------------------------------------------------------------------------------------------------------------------------------------------------------------------------------------------------------------------------------------------------------------------------------------------------------------------------------------------------------------------------------------------------------------------------------------------------------------------------------------------------------------------------------------------------------------------------------------------------------------------------------------------------------------------------------------------------------------------------------------------------------------------------------------------------------------------------------------------------------------------------------------------------------------------------------|-------------------------------------------------------------------------------------------------------------------------------------------------------------------------------------------------------------------------------------------------|-------------------------------------------------------------------------------------------------------------------------------------------------------------------------------------------------------------------------------------------------------------------------------------------------------------------------------------------------------------------------------------------------------------------------------------------------------------------------------------|-----------------------------------------------------------------------------------------------------------------------------------------------------------------------------------------------------------------------------------------------------------------------------------------------------------------------------------------------------------------------------------------------------------------------------|
| EPI_ISL_9610249,<br>EPI_ISL_975221                                                                                                                                                                                                                                                                                                                                                                                                                                                                                                                                                                                                                                                                                                                                                                                                                                                                                                                                                                                                                                                                                                                                                                                                                                                                                                                                                                                                                                                                                                                                                                                                                                                                                                                                                                                                                                                                                                                                                                                                                                                                                                                                                                                                                                                                                                                                                                                                                        | Pandit Dindayal Upadhyay Medical College, Rajkot                                                                                                                                                                                                | Gujarat Biotechnology Research Centre                                                                                                                                                                                                                                                                                                                                                                                                                                               | Akhilesh Modi; Apurvanshi Puvar; Bhadrashreshni Gohil; Chaitanya Joshi; Disha Vora; Janvi Ravai; Jaykumar Rangani; Kavathiya; Madhvi Joshi; Nimesh Patel; Nitin Savaliya; NitinShukla; Priyank Chavda; Ramesh Pandit; Roshani Mishra; Sonal Sharma; Tasmin Trivedi; Zarina Patel                                                                                                                                            |
| EPI_ISL_9793668,<br>EPI_ISL_9793669                                                                                                                                                                                                                                                                                                                                                                                                                                                                                                                                                                                                                                                                                                                                                                                                                                                                                                                                                                                                                                                                                                                                                                                                                                                                                                                                                                                                                                                                                                                                                                                                                                                                                                                                                                                                                                                                                                                                                                                                                                                                                                                                                                                                                                                                                                                                                                                                                       | Pardubicka nemocnice                                                                                                                                                                                                                            | University Hospital Hradec Kralove                                                                                                                                                                                                                                                                                                                                                                                                                                                  | Helena Kovarikova; Lenka Rysava; Marketa Gancarcikova; Monika Berankova                                                                                                                                                                                                                                                                                                                                                     |
| EPI_ISL_9163975                                                                                                                                                                                                                                                                                                                                                                                                                                                                                                                                                                                                                                                                                                                                                                                                                                                                                                                                                                                                                                                                                                                                                                                                                                                                                                                                                                                                                                                                                                                                                                                                                                                                                                                                                                                                                                                                                                                                                                                                                                                                                                                                                                                                                                                                                                                                                                                                                                           | PathWest Laboratory Medicine WA                                                                                                                                                                                                                 | PathWest Laboratory Medicine WA Microbial Surveillance Unit                                                                                                                                                                                                                                                                                                                                                                                                                         | PathWest Laboratory Medicine WA Microbial Surveillance Unit                                                                                                                                                                                                                                                                                                                                                                 |
| EPI_ISL_9625804,<br>EPI_ISL_9625834                                                                                                                                                                                                                                                                                                                                                                                                                                                                                                                                                                                                                                                                                                                                                                                                                                                                                                                                                                                                                                                                                                                                                                                                                                                                                                                                                                                                                                                                                                                                                                                                                                                                                                                                                                                                                                                                                                                                                                                                                                                                                                                                                                                                                                                                                                                                                                                                                       | Pennsylvania Department of Health Bureau of Laboratories                                                                                                                                                                                        | Pennsylvania Department of Health Bureau of Laboratories                                                                                                                                                                                                                                                                                                                                                                                                                            | Dongxing Xia                                                                                                                                                                                                                                                                                                                                                                                                                |
| EPI_ISL_9529329,<br>EPI_ISL_9529336,<br>EPI_ISL_9701562                                                                                                                                                                                                                                                                                                                                                                                                                                                                                                                                                                                                                                                                                                                                                                                                                                                                                                                                                                                                                                                                                                                                                                                                                                                                                                                                                                                                                                                                                                                                                                                                                                                                                                                                                                                                                                                                                                                                                                                                                                                                                                                                                                                                                                                                                                                                                                                                   | Plateforme de testing Namuroise                                                                                                                                                                                                                 | Plateforme de testing Namuroise                                                                                                                                                                                                                                                                                                                                                                                                                                                     | Amédée Ravez; Degosserie Jonathan; Demars Aurore; Denis Olivier; Lesly Nyinkeu Kemamen; Maschietto Céline; Mullier François; Nobis Chloé; Nyinkeu Kemamen Lesly; Otto Gaetan; Ravez Amédée                                                                                                                                                                                                                                  |
| EPI_ISL_9479793, EPI_ISL_9479803, EPI_ISL_9479807, EPI_ISL_9479811, EPI_ISL_9479813, EPI_ISL_9479860, EPI_ISL_9479865, EPI_ISL_9663506                                                                                                                                                                                                                                                                                                                                                                                                                                                                                                                                                                                                                                                                                                                                                                                                                                                                                                                                                                                                                                                                                                                                                                                                                                                                                                                                                                                                                                                                                                                                                                                                                                                                                                                                                                                                                                                                                                                                                                                                                                                                                                                                                                                                                                                                                                                    | see above                                                                                                                                                                                                                                       | see above                                                                                                                                                                                                                                                                                                                                                                                                                                                                           | see above                                                                                                                                                                                                                                                                                                                                                                                                                   |
| EPI_ISL_9594926                                                                                                                                                                                                                                                                                                                                                                                                                                                                                                                                                                                                                                                                                                                                                                                                                                                                                                                                                                                                                                                                                                                                                                                                                                                                                                                                                                                                                                                                                                                                                                                                                                                                                                                                                                                                                                                                                                                                                                                                                                                                                                                                                                                                                                                                                                                                                                                                                                           | Platform BIS UZA/Uantwerpen                                                                                                                                                                                                                     | Labo Klinische Biologie, UZA                                                                                                                                                                                                                                                                                                                                                                                                                                                        | Basil Britto Xavier; Christine Lammens; Herman Goossens; Ines Verbesselt; Jasmine Coppens; Kathleen Holemans; Marie Le Mercier; Veerle Matheusssen                                                                                                                                                                                                                                                                          |
| EPI_ISL_9749064, EPI_ISL_9749065, EPI_ISL_9749066, EPI_ISL_9749070, EPI_ISL_9749071, EPI_ISL_9749072, EPI_ISL_9749075, EPI_ISL_9749079, EPI_ISL_9749080, EPI_ISL_9749081, EPI_ISL_9749082, EPI_ISL_9749083, EPI_ISL_9749085, EPI_ISL_9749087                                                                                                                                                                                                                                                                                                                                                                                                                                                                                                                                                                                                                                                                                                                                                                                                                                                                                                                                                                                                                                                                                                                                                                                                                                                                                                                                                                                                                                                                                                                                                                                                                                                                                                                                                                                                                                                                                                                                                                                                                                                                                                                                                                                                              | Poliklinika "Vitalis"                                                                                                                                                                                                                           | Alea Genetic Centre                                                                                                                                                                                                                                                                                                                                                                                                                                                                 | Dino Pecar; Ivana Ceko; Lana Salihferdic; Rijad Konjodzic                                                                                                                                                                                                                                                                                                                                                                   |
| see above                                                                                                                                                                                                                                                                                                                                                                                                                                                                                                                                                                                                                                                                                                                                                                                                                                                                                                                                                                                                                                                                                                                                                                                                                                                                                                                                                                                                                                                                                                                                                                                                                                                                                                                                                                                                                                                                                                                                                                                                                                                                                                                                                                                                                                                                                                                                                                                                                                                 | Powiatowa Stacja Sanitarno-Epidemiologiczna w Radomiu 1. Academic Center for Pathomorphological and Genetic-Molecular Diagnostics Ltd, Białystok, Poland 2. National Institute of Public Health - National Institute of Hygiene, Warsaw, Poland | 1. Academic Center for Pathomorphological and Genetic-Molecular Diagnostics Ltd, Białystok, Poland 2. National Institute of Public Health - National Institute of Hygiene, Warsaw, Poland                                                                                                                                                                                                                                                                                           | Anetta Sulewska; Jacek Nikliński; Janusz Dzieciol; Joanna Kiśluk; Katarzyna Zacharczuk; Konrad Raczkowski; Magdalena Nowakowska; Małgorzata Sadkowska-Todys; Piotr Karabowicz; Piotr Majewski; Przemysław Bieчек; Joanna Reszeć; Radosław Charkiewicz; Tomasz Wolkowicz                                                                                                                                                     |
| EPI_ISL_9324868                                                                                                                                                                                                                                                                                                                                                                                                                                                                                                                                                                                                                                                                                                                                                                                                                                                                                                                                                                                                                                                                                                                                                                                                                                                                                                                                                                                                                                                                                                                                                                                                                                                                                                                                                                                                                                                                                                                                                                                                                                                                                                                                                                                                                                                                                                                                                                                                                                           | Public Health Laboratory, Public Health Laboratory, Public Health Service, Amsterdam, The Netherlands                                                                                                                                           | inBiome                                                                                                                                                                                                                                                                                                                                                                                                                                                                             | Donald van Pinxteren; Dries Budding; Martine Bos                                                                                                                                                                                                                                                                                                                                                                            |
| EPI_ISL_9306900,<br>EPI_ISL_9306901                                                                                                                                                                                                                                                                                                                                                                                                                                                                                                                                                                                                                                                                                                                                                                                                                                                                                                                                                                                                                                                                                                                                                                                                                                                                                                                                                                                                                                                                                                                                                                                                                                                                                                                                                                                                                                                                                                                                                                                                                                                                                                                                                                                                                                                                                                                                                                                                                       | Public Health Authority of the Slovak Republic                                                                                                                                                                                                  | Regional Public Health Authority with the seat in Trenčín                                                                                                                                                                                                                                                                                                                                                                                                                           | Diana Rusňáková; Katarína Bujňová; Kristína Behová; Lenka Reizigová; Miroslav Böhmer; Natália Križková; Nikola Slivková; Pavol Mišenko; Tomáš Szemes                                                                                                                                                                                                                                                                        |
| EPI_ISL_9342359, EPI_ISL_9684415, EPI_ISL_9684829, EPI_ISL_9684906, EPI_ISL_9684907, EPI_ISL_9684908, EPI_ISL_9684909, EPI_ISL_9684912, EPI_ISL_9684914, EPI_ISL_9684915, EPI_ISL_9684916, EPI_ISL_9685072, EPI_ISL_9685120                                                                                                                                                                                                                                                                                                                                                                                                                                                                                                                                                                                                                                                                                                                                                                                                                                                                                                                                                                                                                                                                                                                                                                                                                                                                                                                                                                                                                                                                                                                                                                                                                                                                                                                                                                                                                                                                                                                                                                                                                                                                                                                                                                                                                               | Public Health Ontario Laboratory                                                                                                                                                                                                                | Public Health Ontario Laboratory                                                                                                                                                                                                                                                                                                                                                                                                                                                    | Aimin Li; Alireza Eshaghi; Andre Villegas; Ashleigh Sullivan; Christine Frantz; Dean Maxwell; Esha Joshi; Jared Simpson; Jennifer L Guthrie; Jonathan B Gubbay; Karthikeyan Sivaraman; Lawrence Heister; Matthew Watson; Michael CY Li; Michael Laszloffy; Nahuel Fittipaldi; Philip Banh; Richard de Borja; Samir N Patel; Sandeep Nagra; Sandra Zittermann; Sarah Teataro; Vanessa G Allen; Yao Chen; Yogi Sundaravadanam |
| EPI_ISL_9755988                                                                                                                                                                                                                                                                                                                                                                                                                                                                                                                                                                                                                                                                                                                                                                                                                                                                                                                                                                                                                                                                                                                                                                                                                                                                                                                                                                                                                                                                                                                                                                                                                                                                                                                                                                                                                                                                                                                                                                                                                                                                                                                                                                                                                                                                                                                                                                                                                                           | Puskesmas Gondokusuman                                                                                                                                                                                                                          | Genetics Working Group (Pokja Genetik) Faculty of Medicine, Public Health and Nursing Universitas Gadjah Mada (FK-KMK UGM); Disease Investigation Center Wates Ministry of Agriculture Indonesia; Department of Microbiology FK-KMK UGM; Laboratorium Diagnostik Yayasan Tahija World Mosquito Program (WMP) Yogyakarta Center for Tropical Medicine FK-KMK UGM; Integrated Research Center FK-KMK UGM; Department of Computer Science and Electronics FMIPA UGM; RSUP Dr. Sardjito | Afiahaisy; Dwi AA Nugrahaningsih; Dyah A Puspitarani; Edwin W. Daniwijaya; Eggi Arizki; Endah Supriyati; Fadila D Utami; Gita C Ghaibri; Gandra; Hendra Wibawa; Ika Trisnawati; Khanza A Vujira; Kristy Iskandar; Lyanah Aditama; Laudria S Erdywin; Ludhang P. Rizki; Mohamad S. Hakim; Nungki Antagomoro; Riati E Hari; Siswanto; Tiik Nuruyusti; Tri Wibawa                                                              |
| EPI_ISL_9644489                                                                                                                                                                                                                                                                                                                                                                                                                                                                                                                                                                                                                                                                                                                                                                                                                                                                                                                                                                                                                                                                                                                                                                                                                                                                                                                                                                                                                                                                                                                                                                                                                                                                                                                                                                                                                                                                                                                                                                                                                                                                                                                                                                                                                                                                                                                                                                                                                                           | Quarantine Camp                                                                                                                                                                                                                                 | Hong Kong Department of Health                                                                                                                                                                                                                                                                                                                                                                                                                                                      | Alan K.L. Tsang; Edman T.K. Lam; Ken H.L. Ng; Patricia K. L. Leung; Peter C.W. Yip; Rickjason C.W. Chan                                                                                                                                                                                                                                                                                                                     |
| EPI_ISL_9651335                                                                                                                                                                                                                                                                                                                                                                                                                                                                                                                                                                                                                                                                                                                                                                                                                                                                                                                                                                                                                                                                                                                                                                                                                                                                                                                                                                                                                                                                                                                                                                                                                                                                                                                                                                                                                                                                                                                                                                                                                                                                                                                                                                                                                                                                                                                                                                                                                                           | RS YARSI                                                                                                                                                                                                                                        | Genomik Solidaritas Indonesia Laboratorium                                                                                                                                                                                                                                                                                                                                                                                                                                          | Anna Christina Brazia; Annisa Muthiah Sukirman; Anuraj Shankar; Ariel Pradipta; Carissa Sintca Wijaya; Dhahlia Agustina Cahyono; Gracia Felias Enos Korompis; Intan Razari; Louisa Markus; Meutia Ayuputeri Kumaheri; Nelly Puspandari; Reinhart Gabriel; Stefanus Bernard; Syukrin Bahri                                                                                                                                   |
| EPI_ISL_9706457                                                                                                                                                                                                                                                                                                                                                                                                                                                                                                                                                                                                                                                                                                                                                                                                                                                                                                                                                                                                                                                                                                                                                                                                                                                                                                                                                                                                                                                                                                                                                                                                                                                                                                                                                                                                                                                                                                                                                                                                                                                                                                                                                                                                                                                                                                                                                                                                                                           | RSAU Dr. Esnawan Antariksa                                                                                                                                                                                                                      | Genomik Solidaritas Indonesia Laboratorium                                                                                                                                                                                                                                                                                                                                                                                                                                          | Aisyi Sakina Rifani; Annisa Muthiah Sukirman; Ariel Pradipta; David Hendra Haryanto; Dian Pitaloka Rajagukguk; Esi Rahayunandz; Tias; Gracia Felias Enos Korompis; Louisa Markus; Meutia Ayuputeri Kumaheri; Nunik Utami; Stefanus Bernard; Vania Gavnila Wikasa                                                                                                                                                            |
| EPI_ISL_9622090, EPI_ISL_9622091, EPI_ISL_9622092, EPI_ISL_9622093, EPI_ISL_9622095, EPI_ISL_9622096, EPI_ISL_9622097                                                                                                                                                                                                                                                                                                                                                                                                                                                                                                                                                                                                                                                                                                                                                                                                                                                                                                                                                                                                                                                                                                                                                                                                                                                                                                                                                                                                                                                                                                                                                                                                                                                                                                                                                                                                                                                                                                                                                                                                                                                                                                                                                                                                                                                                                                                                     | see above                                                                                                                                                                                                                                       | see above                                                                                                                                                                                                                                                                                                                                                                                                                                                                           | see above                                                                                                                                                                                                                                                                                                                                                                                                                   |
| EPI_ISL_9418185,<br>EPI_ISL_9418187,<br>EPI_ISL_9418190,<br>EPI_ISL_9418192,<br>EPI_ISL_9418202,<br>EPI_ISL_9418203                                                                                                                                                                                                                                                                                                                                                                                                                                                                                                                                                                                                                                                                                                                                                                                                                                                                                                                                                                                                                                                                                                                                                                                                                                                                                                                                                                                                                                                                                                                                                                                                                                                                                                                                                                                                                                                                                                                                                                                                                                                                                                                                                                                                                                                                                                                                       | Radboudumc                                                                                                                                                                                                                                      | Radboudumc                                                                                                                                                                                                                                                                                                                                                                                                                                                                          | Arie Ardiansyah Nugraha; Fajar Nur Sulistiyohadi; Hana Aparsi Pawestri; Hartanti Dian Ikawati; Kartika Dewi Puspa; Nelly Puspandari; Nur Ika Hariastuti; Putri Widia; Subangkit; Vivi Setiawaty                                                                                                                                                                                                                             |
| EPI_ISL_9686158                                                                                                                                                                                                                                                                                                                                                                                                                                                                                                                                                                                                                                                                                                                                                                                                                                                                                                                                                                                                                                                                                                                                                                                                                                                                                                                                                                                                                                                                                                                                                                                                                                                                                                                                                                                                                                                                                                                                                                                                                                                                                                                                                                                                                                                                                                                                                                                                                                           | Rahima Moosa Mother and child Hospital                                                                                                                                                                                                          | National Institute for Communicable Diseases of the National Health Laboratory Service                                                                                                                                                                                                                                                                                                                                                                                              | Alma Tostmann; Ingrid Weerdenburg; Jordy Coolen                                                                                                                                                                                                                                                                                                                                                                             |
| EPI_ISL_9467724,<br>EPI_ISL_9467725                                                                                                                                                                                                                                                                                                                                                                                                                                                                                                                                                                                                                                                                                                                                                                                                                                                                                                                                                                                                                                                                                                                                                                                                                                                                                                                                                                                                                                                                                                                                                                                                                                                                                                                                                                                                                                                                                                                                                                                                                                                                                                                                                                                                                                                                                                                                                                                                                       | Ramathibodi Hospital                                                                                                                                                                                                                            | COVID-19 Network Investigations (CONI) Alliance                                                                                                                                                                                                                                                                                                                                                                                                                                     | Amoako DG; Bhiman JN; Everatt J; Ismail A; Kekana D; Mhlangu B; Mnguni A; Mohale T; Ntuli N; Scheepers C; Wolter N                                                                                                                                                                                                                                                                                                          |
| EPI_ISL_9609611                                                                                                                                                                                                                                                                                                                                                                                                                                                                                                                                                                                                                                                                                                                                                                                                                                                                                                                                                                                                                                                                                                                                                                                                                                                                                                                                                                                                                                                                                                                                                                                                                                                                                                                                                                                                                                                                                                                                                                                                                                                                                                                                                                                                                                                                                                                                                                                                                                           | Regional Authority of Public Health Banska Bystrica                                                                                                                                                                                             | Regional Authority of Public Health Banska Bystrica                                                                                                                                                                                                                                                                                                                                                                                                                                 | Angkana Huang; Anthony R. Jones; Arporn Wangwiwatsin; Chonnamet Techasensiri; Chonticha Klungton; Duangkamon Loesbanlekhai; Ekawat Pasomsub; Elizabeth Batty; Janjira Thaipaungpanit; Khajohn Joonlasek; Kingkan Rakmaee; Kritchakorn Sawakongpra; Krittikorn Kumpornwut; Namfon Kotanan; Stefan Fernandez; Thanat Chookajorn; Theerarat Kochakarn; Treewat Watthanachockkhai; Wudthichai Manasatienkij                     |
| EPI_ISL_9259372,<br>EPI_ISL_9259376                                                                                                                                                                                                                                                                                                                                                                                                                                                                                                                                                                                                                                                                                                                                                                                                                                                                                                                                                                                                                                                                                                                                                                                                                                                                                                                                                                                                                                                                                                                                                                                                                                                                                                                                                                                                                                                                                                                                                                                                                                                                                                                                                                                                                                                                                                                                                                                                                       | Regional Hospital Liberec                                                                                                                                                                                                                       | Regional Hospital Liberec                                                                                                                                                                                                                                                                                                                                                                                                                                                           | Alžbeta Pristýáková; Diana Rusňáková; Lucia Madarová; Michaela Mancoš; Miroslav Böhmer; Pavol Mišenko; Soňa Feiková; Terézia Tomajková; Tomáš Szemes                                                                                                                                                                                                                                                                        |
| EPI_ISL_9688093                                                                                                                                                                                                                                                                                                                                                                                                                                                                                                                                                                                                                                                                                                                                                                                                                                                                                                                                                                                                                                                                                                                                                                                                                                                                                                                                                                                                                                                                                                                                                                                                                                                                                                                                                                                                                                                                                                                                                                                                                                                                                                                                                                                                                                                                                                                                                                                                                                           | Regionálne Centrum Krviodávstva i Krviolečnictva w Poznaniu                                                                                                                                                                                     | 1. Academic Center for Pathomorphological and Genetic-Molecular Diagnostics Ltd, Białystok, Poland 2. National Institute of Public Health - National Institute of Hygiene, Warsaw, Poland                                                                                                                                                                                                                                                                                           | Iva Dolinova; Katerina Arientova; Katerina Stillerova; Martin Kracik; Tomas Zajic                                                                                                                                                                                                                                                                                                                                           |
| EPI_ISL_9588811, EPI_ISL_9588823, EPI_ISL_9691616, EPI_ISL_9781974, EPI_ISL_9782497, EPI_ISL_9782891, EPI_ISL_9784170, EPI_ISL_9784204, EPI_ISL_9814589, EPI_ISL_9814747, EPI_ISL_9814836, EPI_ISL_9814945                                                                                                                                                                                                                                                                                                                                                                                                                                                                                                                                                                                                                                                                                                                                                                                                                                                                                                                                                                                                                                                                                                                                                                                                                                                                                                                                                                                                                                                                                                                                                                                                                                                                                                                                                                                                                                                                                                                                                                                                                                                                                                                                                                                                                                                | Regionálne Centrum Krviodávstva i Krviolečnictva w Poznaniu                                                                                                                                                                                     | 1. Academic Center for Pathomorphological and Genetic-Molecular Diagnostics Ltd, Białystok, Poland 2. National Institute of Public Health - National Institute of Hygiene, Warsaw, Poland                                                                                                                                                                                                                                                                                           | Anetta Sulewska; Jacek Nikliński; Janusz Dzieciol; Joanna Kiśluk; Katarzyna Zacharczuk; Konrad Raczkowski; Magdalena Nowakowska; Małgorzata Sadkowska-Todys; Piotr Karabowicz; Piotr Majewski; Przemysław Bieчек; Joanna Reszeć; Radosław Charkiewicz; Tomasz Wolkowicz                                                                                                                                                     |
| see above                                                                                                                                                                                                                                                                                                                                                                                                                                                                                                                                                                                                                                                                                                                                                                                                                                                                                                                                                                                                                                                                                                                                                                                                                                                                                                                                                                                                                                                                                                                                                                                                                                                                                                                                                                                                                                                                                                                                                                                                                                                                                                                                                                                                                                                                                                                                                                                                                                                 | Respiratory Virus Unit, Microbiology Services Colindale, Public Health England                                                                                                                                                                  | COVID-19 Genomics UK (COG-UK) Consortium                                                                                                                                                                                                                                                                                                                                                                                                                                            | PHE Covid Sequencing Team                                                                                                                                                                                                                                                                                                                                                                                                   |
| EPI_ISL_9365509, EPI_ISL_9365931, EPI_ISL_9365960, EPI_ISL_9365971, EPI_ISL_9365994, EPI_ISL_9367177, EPI_ISL_9367192, EPI_ISL_9367292, EPI_ISL_9378284, EPI_ISL_9378864, EPI_ISL_9378965, EPI_ISL_9379717, EPI_ISL_9379748, EPI_ISL_9381248, EPI_ISL_9381297, EPI_ISL_9381338, EPI_ISL_9381391, EPI_ISL_9381424, EPI_ISL_9381613, EPI_ISL_9381620, EPI_ISL_9381652, EPI_ISL_9381895, EPI_ISL_9381897, EPI_ISL_9382085, EPI_ISL_9383244, EPI_ISL_9383280, EPI_ISL_9383303, EPI_ISL_9383349, EPI_ISL_9383406, EPI_ISL_9383461, EPI_ISL_9383504, EPI_ISL_9383509, EPI_ISL_9383591, EPI_ISL_9383671, EPI_ISL_9383702, EPI_ISL_9383930, EPI_ISL_9383991, EPI_ISL_9383918, EPI_ISL_9383923, EPI_ISL_9384000, EPI_ISL_9384041, EPI_ISL_9384042, EPI_ISL_9384043, EPI_ISL_9384049, EPI_ISL_9439940, EPI_ISL_9439965, EPI_ISL_9439979, EPI_ISL_9439998, EPI_ISL_9440040, EPI_ISL_9440092, EPI_ISL_9440128, EPI_ISL_9443607, EPI_ISL_9443689, EPI_ISL_9443807, EPI_ISL_9443865, EPI_ISL_9444171, EPI_ISL_9444180, EPI_ISL_9447897, EPI_ISL_9448425, EPI_ISL_9448756, EPI_ISL_9449071, EPI_ISL_9449232, EPI_ISL_9505558, EPI_ISL_9505627, EPI_ISL_9505815, EPI_ISL_9506036, EPI_ISL_9506140, EPI_ISL_9506216, EPI_ISL_9506228, EPI_ISL_9506234, EPI_ISL_9506248, EPI_ISL_9507648, EPI_ISL_9507659, EPI_ISL_9507902, EPI_ISL_9508660, EPI_ISL_9508666, EPI_ISL_9509887, EPI_ISL_9509995, EPI_ISL_9510214, EPI_ISL_9510238, EPI_ISL_9558871, EPI_ISL_9559086, EPI_ISL_9556177, EPI_ISL_9556340, EPI_ISL_9558251, EPI_ISL_9558260, EPI_ISL_9558283, EPI_ISL_9558289, EPI_ISL_9558306, EPI_ISL_9558334, EPI_ISL_9558573, EPI_ISL_9559484, EPI_ISL_9559666, EPI_ISL_9559701, EPI_ISL_9559783, EPI_ISL_9559874, EPI_ISL_9559944, EPI_ISL_9559970, EPI_ISL_9560031, EPI_ISL_9560078, EPI_ISL_9565761, EPI_ISL_9566366, EPI_ISL_9566382, EPI_ISL_9566398, EPI_ISL_9566530, EPI_ISL_9566593, EPI_ISL_9566702, EPI_ISL_9567045, EPI_ISL_9567317, EPI_ISL_9567425, EPI_ISL_9567573, EPI_ISL_9567637, EPI_ISL_9580069, EPI_ISL_9580112, EPI_ISL_9580116, EPI_ISL_9580133, EPI_ISL_9580137, EPI_ISL_9582411, EPI_ISL_9582424, EPI_ISL_9582557, EPI_ISL_9582569, EPI_ISL_9582678, EPI_ISL_9583127, EPI_ISL_9583176, EPI_ISL_9583192, EPI_ISL_9583247, EPI_ISL_9583270, EPI_ISL_9584088, EPI_ISL_9584203, EPI_ISL_9584340, EPI_ISL_9585869, EPI_ISL_9586010, EPI_ISL_9586533, EPI_ISL_9619115, EPI_ISL_9619134, EPI_ISL_9619263, EPI_ISL_9620356, EPI_ISL_9620392, EPI_ISL_9647967 |                                                                                                                                                                                                                                                 |                                                                                                                                                                                                                                                                                                                                                                                                                                                                                     |                                                                                                                                                                                                                                                                                                                                                                                                                             |
| see above                                                                                                                                                                                                                                                                                                                                                                                                                                                                                                                                                                                                                                                                                                                                                                                                                                                                                                                                                                                                                                                                                                                                                                                                                                                                                                                                                                                                                                                                                                                                                                                                                                                                                                                                                                                                                                                                                                                                                                                                                                                                                                                                                                                                                                                                                                                                                                                                                                                 | Rosalind Franklin Laboratory                                                                                                                                                                                                                    | Wellcome Sanger Institute for the COVID-19 Genomics UK (COG-UK) Consortium                                                                                                                                                                                                                                                                                                                                                                                                          | Cordelia Langford; David K. Jackson; Dominic Kwiatkowski; Donald Fraser; Ewan Harrison; Ian Johnston; Jeffrey Barrett; John Sillitoe on behalf of the Wellcome Sanger Institute COVID-19 Surveillance Team; Rob Howes; Roberto Amato; Sonia Goncalves; Suki Lee; The Rosalind Franklin Laboratory and Alex Alderton                                                                                                         |
| EPI_ISL_9496201                                                                                                                                                                                                                                                                                                                                                                                                                                                                                                                                                                                                                                                                                                                                                                                                                                                                                                                                                                                                                                                                                                                                                                                                                                                                                                                                                                                                                                                                                                                                                                                                                                                                                                                                                                                                                                                                                                                                                                                                                                                                                                                                                                                                                                                                                                                                                                                                                                           | Royal GD                                                                                                                                                                                                                                        | Royal GD                                                                                                                                                                                                                                                                                                                                                                                                                                                                            | Remco Dijkman                                                                                                                                                                                                                                                                                                                                                                                                               |
| EPI_ISL_9792092                                                                                                                                                                                                                                                                                                                                                                                                                                                                                                                                                                                                                                                                                                                                                                                                                                                                                                                                                                                                                                                                                                                                                                                                                                                                                                                                                                                                                                                                                                                                                                                                                                                                                                                                                                                                                                                                                                                                                                                                                                                                                                                                                                                                                                                                                                                                                                                                                                           | SALUD DIGNA                                                                                                                                                                                                                                     | Instituto Nacional de Medicina Genomica                                                                                                                                                                                                                                                                                                                                                                                                                                             | Abraham Campos-Romero; Cedro-Tanda A; Escobar-Arrazola MA; Garnica-Lopez Dora; Herrera-Montalvo LA.; Hidalgo-Miranda A; Luna-Ruiz Marco; Mendoza-Vargas A; Moreno-Camacho José Luis; Ramirez-Vega O; Rangel-DeLeon D; Reyes-Grajeda JP; Rodriguez-Gallegos Jorge; Yair Alfaro-Mora                                                                                                                                          |
| EPI_ISL_9797426                                                                                                                                                                                                                                                                                                                                                                                                                                                                                                                                                                                                                                                                                                                                                                                                                                                                                                                                                                                                                                                                                                                                                                                                                                                                                                                                                                                                                                                                                                                                                                                                                                                                                                                                                                                                                                                                                                                                                                                                                                                                                                                                                                                                                                                                                                                                                                                                                                           | SEL B2A LABM STORCK                                                                                                                                                                                                                             | CERBA HealthCare                                                                                                                                                                                                                                                                                                                                                                                                                                                                    | Bénédicte Roquebert; Laura Verdurem; Mathilde Roussel; Sabine Trombert; Stéphanie Haim-Boukobza                                                                                                                                                                                                                                                                                                                             |
| EPI_ISL_9612760,<br>EPI_ISL_9612767,<br>EPI_ISL_9612779,<br>EPI_ISL_9612781                                                                                                                                                                                                                                                                                                                                                                                                                                                                                                                                                                                                                                                                                                                                                                                                                                                                                                                                                                                                                                                                                                                                                                                                                                                                                                                                                                                                                                                                                                                                                                                                                                                                                                                                                                                                                                                                                                                                                                                                                                                                                                                                                                                                                                                                                                                                                                               | SP ZOZ Centralny Szpital Kliniczny UM w Lodzi Pracownia Diagnostyki Wirusow Oddechowych                                                                                                                                                         | Wojewodzka Stacja Sanitarno-Epidemiologiczna w Lodzi, Oddzial Laboratoryjny Mikrobiologii i Parazytologii                                                                                                                                                                                                                                                                                                                                                                           | Agnieszka Karnowska; Aleksandra Krawczyk; Danuta Bartczak; Elian Terpo; Katarzyna Kosowska; Lucyna Kochanowska; Marta Gawronska; Martyna Matera; Szymon Konkolewski                                                                                                                                                                                                                                                         |
| EPI_ISL_9713119,<br>EPI_ISL_9713151                                                                                                                                                                                                                                                                                                                                                                                                                                                                                                                                                                                                                                                                                                                                                                                                                                                                                                                                                                                                                                                                                                                                                                                                                                                                                                                                                                                                                                                                                                                                                                                                                                                                                                                                                                                                                                                                                                                                                                                                                                                                                                                                                                                                                                                                                                                                                                                                                       | SPZOZ w Kędzierzynie-Koźlu                                                                                                                                                                                                                      | 1. Academic Center for Pathomorphological and Genetic-Molecular Diagnostics Ltd, Białystok, Poland 2. National Institute of Public Health - National Institute of Hygiene, Warsaw, Poland                                                                                                                                                                                                                                                                                           | Anetta Sulewska; Jacek Nikliński; Janusz Dzieciol; Joanna Kiśluk; Katarzyna Zacharczuk; Konrad Raczkowski; Magdalena Nowakowska; Małgorzata Sadkowska-Todys; Piotr Karabowicz; Piotr Majewski; Przemysław Bieчек; Joanna Reszeć; Radosław Charkiewicz; Tomasz Wolkowicz                                                                                                                                                     |
| EPI_ISL_9714428, EPI_ISL_9715511, EPI_ISL_9715516, EPI_ISL_9715556, EPI_ISL_9720062, EPI_ISL_9720068, EPI_ISL_9720074, EPI_ISL_9720079, EPI_ISL_9720099, EPI_ISL_9720102, EPI_ISL_9720174, EPI_ISL_9720185, EPI_ISL_9720200, EPI_ISL_9720214, EPI_ISL_9720219, EPI_ISL_9720220, EPI_ISL_9720228, EPI_ISL_9720234, EPI_ISL_9720340, EPI_ISL_9720341, EPI_ISL_9720348, EPI_ISL_9722098, EPI_ISL_9722366, EPI_ISL_9722892, EPI_ISL_9722897, EPI_ISL_9722899, EPI_ISL_9722992, EPI_ISL_9723309, EPI_ISL_9724775, EPI_ISL_9724931, EPI_ISL_9724944, EPI_ISL_9725040, EPI_ISL_9725153, EPI_ISL_9725405, EPI_ISL_9725507, EPI_ISL_9725538                                                                                                                                                                                                                                                                                                                                                                                                                                                                                                                                                                                                                                                                                                                                                                                                                                                                                                                                                                                                                                                                                                                                                                                                                                                                                                                                                                                                                                                                                                                                                                                                                                                                                                                                                                                                                        | see above                                                                                                                                                                                                                                       | see above                                                                                                                                                                                                                                                                                                                                                                                                                                                                           | see above                                                                                                                                                                                                                                                                                                                                                                                                                   |
| EPI_ISL_9714463, EPI_ISL_9720153, EPI_ISL_9720251, EPI_ISL_9720285, EPI_ISL_9720407, EPI_ISL_9722156, EPI_ISL_9722157, EPI_ISL_9722915, EPI_ISL_9723281, EPI_ISL_9723318                                                                                                                                                                                                                                                                                                                                                                                                                                                                                                                                                                                                                                                                                                                                                                                                                                                                                                                                                                                                                                                                                                                                                                                                                                                                                                                                                                                                                                                                                                                                                                                                                                                                                                                                                                                                                                                                                                                                                                                                                                                                                                                                                                                                                                                                                  | see above                                                                                                                                                                                                                                       | see above                                                                                                                                                                                                                                                                                                                                                                                                                                                                           | see above                                                                                                                                                                                                                                                                                                                                                                                                                   |
| EPI_ISL_9714479, EPI_ISL_9715455, EPI_ISL_9715485, EPI_ISL_9715491, EPI_ISL_9715504, EPI_ISL_9715562, EPI_ISL_9715571, EPI_ISL_9715602, EPI_ISL_9715655, EPI_ISL_9715658, EPI_ISL_9715666, EPI_ISL_9715674, EPI_ISL_9715675, EPI_ISL_9720066, EPI_ISL_9720067, EPI_ISL_9720073, EPI_ISL_9720080, EPI_ISL_9720085, EPI_ISL_9720086, EPI_ISL_9720090, EPI_ISL_9720093, EPI_ISL_9720105, EPI_ISL_9720123, EPI_ISL_9720133, EPI_ISL_9720137, EPI_ISL_9720141, EPI_ISL_9720147, EPI_ISL_9720148, EPI_ISL_9720158, EPI_ISL_9720179, EPI_ISL_9720206, EPI_ISL_9720207, EPI_ISL_9720213, EPI_ISL_9720216, EPI_ISL_9720254, EPI_ISL_9720258, EPI_ISL_9720260, EPI_ISL_9720268, EPI_ISL_9720271, EPI_ISL_9720296, EPI_ISL_9720304, EPI_ISL_9720318, EPI_ISL_9720350, EPI_ISL_9720353, EPI_ISL_9720354, EPI_ISL_9720359, EPI_ISL_9720362, EPI_ISL_9720368, EPI_ISL_9720371, EPI_ISL_9720380, EPI_ISL_9720403, EPI_ISL_9720404, EPI_ISL_9722387, EPI_ISL_9722587, EPI_ISL_9725151, EPI_ISL_9725324, EPI_ISL_9725369                                                                                                                                                                                                                                                                                                                                                                                                                                                                                                                                                                                                                                                                                                                                                                                                                                                                                                                                                                                                                                                                                                                                                                                                                                                                                                                                                                                                                                                   |                                                                                                                                                                                                                                                 |                                                                                                                                                                                                                                                                                                                                                                                                                                                                                     |                                                                                                                                                                                                                                                                                                                                                                                                                             |
| see above                                                                                                                                                                                                                                                                                                                                                                                                                                                                                                                                                                                                                                                                                                                                                                                                                                                                                                                                                                                                                                                                                                                                                                                                                                                                                                                                                                                                                                                                                                                                                                                                                                                                                                                                                                                                                                                                                                                                                                                                                                                                                                                                                                                                                                                                                                                                                                                                                                                 | SYNLAB MVZ Leinfelden-Echterdingen                                                                                                                                                                                                              | Robert Koch Institute                                                                                                                                                                                                                                                                                                                                                                                                                                                               | Robert Koch Institute                                                                                                                                                                                                                                                                                                                                                                                                       |
| EPI_ISL_9463271                                                                                                                                                                                                                                                                                                                                                                                                                                                                                                                                                                                                                                                                                                                                                                                                                                                                                                                                                                                                                                                                                                                                                                                                                                                                                                                                                                                                                                                                                                                                                                                                                                                                                                                                                                                                                                                                                                                                                                                                                                                                                                                                                                                                                                                                                                                                                                                                                                           | SYNLAB MVZ Leverkusen                                                                                                                                                                                                                           | Robert Koch Institute                                                                                                                                                                                                                                                                                                                                                                                                                                                               | Robert Koch Institute                                                                                                                                                                                                                                                                                                                                                                                                       |
| EPI_ISL_9723300                                                                                                                                                                                                                                                                                                                                                                                                                                                                                                                                                                                                                                                                                                                                                                                                                                                                                                                                                                                                                                                                                                                                                                                                                                                                                                                                                                                                                                                                                                                                                                                                                                                                                                                                                                                                                                                                                                                                                                                                                                                                                                                                                                                                                                                                                                                                                                                                                                           | SYNLAB MVZ Neustadt a. d. Weinstraße                                                                                                                                                                                                            | Robert Koch Institute                                                                                                                                                                                                                                                                                                                                                                                                                                                               | Robert Koch Institute                                                                                                                                                                                                                                                                                                                                                                                                       |
| EPI_ISL_9714450, EPI_ISL_9714457, EPI_ISL_9715527, EPI_ISL_9715529, EPI_ISL_9715538, EPI_ISL_9715545, EPI_ISL_9715554, EPI_ISL_9715588, EPI_ISL_9715598, EPI_ISL_9715646, EPI_ISL_9715648, EPI_ISL_9715692, EPI_ISL_9720070, EPI_ISL_9720077, EPI_ISL_9720128, EPI_ISL_9720160, EPI_ISL_9720171, EPI_ISL_9720210, EPI_ISL_9720218, EPI_ISL_9720221, EPI_ISL_9720247, EPI_ISL_9720287, EPI_ISL_9720289, EPI_ISL_9720317, EPI_ISL_9720322, EPI_ISL_9720323, EPI_ISL_9720324, EPI_ISL_9720331, EPI_ISL_9720336, EPI_ISL_9720420, EPI_ISL_9720423, EPI_ISL_9720440, EPI_ISL_9720442, EPI_ISL_9720461, EPI_ISL_9720462, EPI_ISL_9720536, EPI_ISL_9720801, EPI_ISL_9720810, EPI_ISL_9720865, EPI_ISL_9720895, EPI_ISL_9721863, EPI_ISL_9721933, EPI_ISL_9722030, EPI_ISL_9722246, EPI_ISL_9722301, EPI_ISL_9722384, EPI_ISL_9722460, EPI_ISL_9722473, EPI_ISL_9722505, EPI_ISL_9722508, EPI_ISL_9722670, EPI_ISL_9723056, EPI_ISL_9723061, EPI_ISL_9723073, EPI_ISL_9723100, EPI_ISL_9723122, EPI_ISL_9723154, EPI_ISL_9723181, EPI_ISL_9723216                                                                                                                                                                                                                                                                                                                                                                                                                                                                                                                                                                                                                                                                                                                                                                                                                                                                                                                                                                                                                                                                                                                                                                                                                                                                                                                                                                                                                 |                                                                                                                                                                                                                                                 |                                                                                                                                                                                                                                                                                                                                                                                                                                                                                     |                                                                                                                                                                                                                                                                                                                                                                                                                             |
| see above                                                                                                                                                                                                                                                                                                                                                                                                                                                                                                                                                                                                                                                                                                                                                                                                                                                                                                                                                                                                                                                                                                                                                                                                                                                                                                                                                                                                                                                                                                                                                                                                                                                                                                                                                                                                                                                                                                                                                                                                                                                                                                                                                                                                                                                                                                                                                                                                                                                 | SYNLAB MVZ Trier                                                                                                                                                                                                                                | Robert Koch Institute                                                                                                                                                                                                                                                                                                                                                                                                                                                               | Robert Koch Institute                                                                                                                                                                                                                                                                                                                                                                                                       |
| EPI_ISL_9720081, EPI_ISL_9720087, EPI_ISL_9720097, EPI_ISL_9720120, EPI_ISL_9720475, EPI_ISL_9720482, EPI_ISL_9722574, EPI_ISL_9722886, EPI_ISL_9722916                                                                                                                                                                                                                                                                                                                                                                                                                                                                                                                                                                                                                                                                                                                                                                                                                                                                                                                                                                                                                                                                                                                                                                                                                                                                                                                                                                                                                                                                                                                                                                                                                                                                                                                                                                                                                                                                                                                                                                                                                                                                                                                                                                                                                                                                                                   | see above                                                                                                                                                                                                                                       | see above                                                                                                                                                                                                                                                                                                                                                                                                                                                                           | see above                                                                                                                                                                                                                                                                                                                                                                                                                   |

|                                                                                                                                                                                                                                              |                                                                             |                                                                                                                                                                                           |                                                                                                                                                                                                                                                                                                                                                                                                                                                                         |
|----------------------------------------------------------------------------------------------------------------------------------------------------------------------------------------------------------------------------------------------|-----------------------------------------------------------------------------|-------------------------------------------------------------------------------------------------------------------------------------------------------------------------------------------|-------------------------------------------------------------------------------------------------------------------------------------------------------------------------------------------------------------------------------------------------------------------------------------------------------------------------------------------------------------------------------------------------------------------------------------------------------------------------|
| see above                                                                                                                                                                                                                                    | SYNLAB MVZ Weiden                                                           | Robert Koch Institute                                                                                                                                                                     |                                                                                                                                                                                                                                                                                                                                                                                                                                                                         |
| EPI_ISL_9751031                                                                                                                                                                                                                              | SangLab Karlovy Vary                                                        | Department of Microbiology, University Hospital in Pilsen                                                                                                                                 | Jaroslav Hrabak; Katerina Chudejova; Katerina Vlkova; Petra Kocova; Vendula Heringova                                                                                                                                                                                                                                                                                                                                                                                   |
| EPI_ISL_9618106, EPI_ISL_9618107, EPI_ISL_9618108, EPI_ISL_9618109, EPI_ISL_9775188, EPI_ISL_9775189, EPI_ISL_9775190, EPI_ISL_9775191, EPI_ISL_9775192, EPI_ISL_9775193, EPI_ISL_9775195, EPI_ISL_9775197                                   | Sanjeevani Metropolis, Rajkot                                               | Gujarat Biotechnology Research Centre                                                                                                                                                     | Akhilesh Modi; Apurvasinh Puvar; Bhadreshsinh Gohil; Chaitanya Joshi; Disha Vora; Janvi Raval; Jaykumar Rangani; Madhvi Joshi; Nimesh Patel; Nitin Savaliya; NitinShukla; Priyank Chavda; Ramesh Pandit; Roshani Mishra; Shaquqat Jahan; Sonal Sharma; Tasnim Trivedi; Zarna Patel                                                                                                                                                                                      |
| EPI_ISL_9781623, EPI_ISL_9781624, EPI_ISL_9781628, EPI_ISL_9781633, EPI_ISL_9781634, EPI_ISL_9781635, EPI_ISL_9781636, EPI_ISL_9781638, EPI_ISL_9781639, EPI_ISL_9781650, EPI_ISL_9781655, EPI_ISL_9781672                                   | School of Tropical Medicine, Kolkata                                        | CSIR-Indian Institute of Chemical Biology                                                                                                                                                 | Arun Bandyopadhyay; INSACOG; Partha Chakrabarti; Poulomi Sarkar; Saikat Chakrabarti; Sarthak Banerjee; Siddik Sarkar                                                                                                                                                                                                                                                                                                                                                    |
| EPI_ISL_9638402                                                                                                                                                                                                                              | Seattle Flu Study                                                           | Seattle Flu Study                                                                                                                                                                         | Amanda Adler; Barry R. Lutz; Benjamin Pelle; Caitlin R. Wolf; Chris D. Frazar; Deborah A. Nickerson; Elisabeth Brandtetter; Erica Ryke; Helen Y. Chu; Janet A. Englund; Jay Shendure; Jover Lee; Kairsten Fay; Kirsten Lacombe; Lea M. Starita; Mark J. Rieder; Matthew Richardson; Matthew Thompson; Melissa Truong; Michael Boeckh; Michael Famulare; Misja Ilicisin; Peter D. Han; Thomas R. Sibley; Trevor Bedford<br>Galan J.C; Martinez-García L.; Ponce-Alonso M |
| EPI_ISL_9612091                                                                                                                                                                                                                              | Servicio de Microbiologia Hospital Ramon y Cajal                            | Servicio de Microbiologia Hospital Ramon y Cajal                                                                                                                                          | Abu Hamad Ramzia; Adina Bar Chaim; Alona Frenkel; Anna Vishnevsky; Chen Weiner; Nir Rainy; Patricia Benveniste-Lekovitz; Reut Sorek Abramovich; Yevgeni Yegorov                                                                                                                                                                                                                                                                                                         |
| EPI_ISL_9588122, EPI_ISL_9588123, EPI_ISL_9592672, EPI_ISL_9592793, EPI_ISL_9657766, EPI_ISL_9657811                                                                                                                                         | Shamir Medical Center (Asaf Harofe)                                         | Shamir Medical Center (Asaf Harofe)                                                                                                                                                       |                                                                                                                                                                                                                                                                                                                                                                                                                                                                         |
| EPI_ISL_9775164, EPI_ISL_9775165                                                                                                                                                                                                             | Shantaba Medical College, Amreli                                            | Gujarat Biotechnology Research Centre                                                                                                                                                     | Akhilesh Modi; Apurvasinh Puvar; Bhadreshsinh Gohil; Chaitanya Joshi; Disha Vora; Hetvi; Janvi Raval; Jaykumar Rangani; Madhvi Joshi; Nimesh Patel; Nitin Savaliya; NitinShukla; Priyank Chavda; Ramanuj; Ramesh Pandit; Roshani Mishra; Sonal Sharma; Tasnim Trivedi; Zarna Patel                                                                                                                                                                                      |
| EPI_ISL_9751177, EPI_ISL_9751395                                                                                                                                                                                                             | Southern Nevada Public Health Laboratory                                    | Southern Nevada Public Health Laboratory                                                                                                                                                  | Michael Picker                                                                                                                                                                                                                                                                                                                                                                                                                                                          |
| EPI_ISL_9436075, EPI_ISL_9436077, EPI_ISL_9436078, EPI_ISL_9436079, EPI_ISL_9436080, EPI_ISL_9436081, EPI_ISL_9436082, EPI_ISL_9483749                                                                                                       | State Laboratories Division, Hawaii State Department of Health              | State Laboratories Division, Hawaii State Department of Health                                                                                                                            | Ayana Garnet; Briana Ofilas; Cheryl-Lynn Daquip; Cheyenne Barela; Daniel Strange; Drew Kuwazaki; Edward Desmond; Jeffrey Au; Mark Nagata; Pamela O'Brien; Razvan Sultana; Remedios Gose; Samantha Cotter; Samantha Sruba                                                                                                                                                                                                                                                |
| EPI_ISL_9775217                                                                                                                                                                                                                              | Sterling Accuris, Vadodara                                                  | Gujarat Biotechnology Research Centre                                                                                                                                                     | Akhilesh Modi; Apurvasinh Puvar; Bhadreshsinh Gohil; Chaitanya Joshi; Disha Vora; Janvi Raval; Jaykumar Rangani; Madhvi Joshi; Nimesh Patel; Nitin Savaliya; NitinShukla; Priyank Chavda; Ramesh Pandit; Roshani Mishra; Sonal Sharma; Srinivasan; Tasnim Trivedi; Zarna Patel                                                                                                                                                                                          |
| EPI_ISL_9775218                                                                                                                                                                                                                              | Sterling Diagnostic Center, Bhavnagar                                       | Gujarat Biotechnology Research Centre                                                                                                                                                     | Akhilesh Modi; Apurvasinh Puvar; Bhadreshsinh Gohil; Chaitanya Joshi; Disha Vora; Janvi Raval; Jaykumar Rangani; Madhvi Joshi; Nimesh Patel; Nitin Savaliya; NitinShukla; Priyank Chavda; Ramesh Pandit; Roshani Mishra; Sonal Sharma; Tasnim Trivedi; Zarna Patel                                                                                                                                                                                                      |
| EPI_ISL_9618110, EPI_ISL_9618120, EPI_ISL_9618121                                                                                                                                                                                            | Sunflower Laboratory, Memnagar, Ahmedabad                                   | Gujarat Biotechnology Research Centre                                                                                                                                                     | Akhilesh Modi; Apurvasinh Puvar; Bhadreshsinh Gohil; Chaitanya Joshi; D.G.Patel; Disha Vora; Janvi Raval; Jaykumar Rangani; Madhvi Joshi; Manprit; Nimesh Patel; Nitin Savaliya; NitinShukla; Priyank Chavda; Ramesh Pandit; Roshani Mishra; Sonal Sharma; Tasnim Trivedi; Zarna Patel                                                                                                                                                                                  |
| EPI_ISL_9775277                                                                                                                                                                                                                              | Supratech Micropath Diagnostics & Research laboratory Ahmedabad             | Gujarat Biotechnology Research Centre                                                                                                                                                     | Akhilesh Modi; Ameer Shukla; Apurvasinh Puvar; Bhadreshsinh Gohil; Chaitanya Joshi; Disha Vora; Janvi Raval; Jaykumar Rangani; Madhvi Joshi; Nimesh Patel; Nitin Savaliya; NitinShukla; Priyank Chavda; Ramesh Pandit; Roshani Mishra; Sonal Sharma; Tasnim Trivedi; Zarna Patel                                                                                                                                                                                        |
| EPI_ISL_9696290                                                                                                                                                                                                                              | Surat Municipal Institute of Medical Education and Research (SMIMER), Surat | Gujarat Biotechnology Research Centre                                                                                                                                                     | Akhilesh Modi; Apurvasinh Puvar; Bhadreshsinh Gohil; Chaitanya Joshi; Disha Vora; Janvi Raval; Jaykumar Rangani; Madhvi Joshi; Manish Patel; Nimesh Patel; Nitin Savaliya; NitinShukla; Priyank Chavda; Ramesh Pandit; Roshani Mishra; Sonal Sharma; Tasnim Trivedi; Zarna Patel                                                                                                                                                                                        |
| EPI_ISL_9511722, EPI_ISL_9511890, EPI_ISL_9511971                                                                                                                                                                                            | Sweden/Sodermanland/Unilabs                                                 | Unilabs/Eskilstuna/Sweden                                                                                                                                                                 | Emma Arvidsson                                                                                                                                                                                                                                                                                                                                                                                                                                                          |
| EPI_ISL_9696661, EPI_ISL_9696673, EPI_ISL_9696679, EPI_ISL_9696683, EPI_ISL_9696695, EPI_ISL_9696698, EPI_ISL_9696726, EPI_ISL_9696728, EPI_ISL_9696734, EPI_ISL_9696768, EPI_ISL_9696769, EPI_ISL_9696771, EPI_ISL_9696801, EPI_ISL_9696839 | Sweden/Vastragotland/Unilabs                                                | Unilabs/Eskilstuna/Sweden                                                                                                                                                                 | Emma Arvidsson                                                                                                                                                                                                                                                                                                                                                                                                                                                          |
| see above                                                                                                                                                                                                                                    | Synlab MVZ Augsburg                                                         | Robert Koch Institute                                                                                                                                                                     |                                                                                                                                                                                                                                                                                                                                                                                                                                                                         |
| EPI_ISL_9612839, EPI_ISL_9612840                                                                                                                                                                                                             | Szpital Powiatowy w Radomsku Zakład Diagnostyki Laboratoryjnej              | Wojewodzka Stacja Sanitarno-Epidemiologiczna w Lodzi, Oddzial Laboratoryjny Mikrobiologii i Parazytologii                                                                                 | Agnieszka Karnowska; Aleksandra Krawczyk; Danuta Bartczak; Elian Terpo; Katarzyna Kosowska; Lucyna Kochanowska; Marta Gawronska; Martyna Matera; Szymon Konkolewski                                                                                                                                                                                                                                                                                                     |
| EPI_ISL_9687937, EPI_ISL_9687943                                                                                                                                                                                                             | Szpital Wojewódzki im. Kardynała Stefana Wyszyńskiego w Łomży               | 1. Academic Center for Pathomorphological and Genetic-Molecular Diagnostics Ltd, Białystok, Poland 2. National Institute of Public Health - National Institute of Hygiene, Warsaw, Poland | Anetta Sulewska; Jacek Nikliński; Janusz Dzięciół; Joanna Kiśluk; Katarzyna Zacharczuk; Konrad Raczkowski; Magdalena Nowakowska; Małgorzata Sadkowska-Todys; Piotr Karabowicz; Piotr Majewski; Przemysław Błaciek; Joanna Reszeć; Radosław Charkiewicz; Tomasz Wołkowicz                                                                                                                                                                                                |
| EPI_ISL_9644499, EPI_ISL_9644504, EPI_ISL_9644507                                                                                                                                                                                            | Temporary Specimen Collection Centre at the AsiaWorld-Expo                  | Hong Kong Department of Health                                                                                                                                                            | Alan K.L. Tsang; Edman T.K. Lam; Ken H.L. Ng; Patricia K. L. Leung; Peter C.W. Yip; Rickjason C.W. Chan                                                                                                                                                                                                                                                                                                                                                                 |
| EPI_ISL_9631356, EPI_ISL_9631373                                                                                                                                                                                                             | The Jackson Laboratory                                                      | The Jackson Laboratory                                                                                                                                                                    | Adams M; Kelly K; Li L; Long E; Omerza G; Renzette N                                                                                                                                                                                                                                                                                                                                                                                                                    |
| EPI_ISL_9332962, EPI_ISL_9332963, EPI_ISL_9332986                                                                                                                                                                                            | The Ohio State University Applied Microbiology Services Laboratory          | The Ohio State University Applied Microbiology Services Laboratory                                                                                                                        | Seth A. Faith PhD                                                                                                                                                                                                                                                                                                                                                                                                                                                       |
| EPI_ISL_9775238, EPI_ISL_9775239, EPI_ISL_9775240, EPI_ISL_9775241, EPI_ISL_9775246                                                                                                                                                          | Toprani Advance lab Systems, Vadodara                                       | Gujarat Biotechnology Research Centre                                                                                                                                                     | Akhilesh Modi; Apurvasinh Puvar; Bhadreshsinh Gohil; Chaitanya Joshi; Disha Vora; Janvi Raval; Jaykumar Rangani; Madhvi Joshi; Nimesh Patel; Nitin Savaliya; NitinShukla; Priyank Chavda; Ramesh Pandit; Roshani Mishra; Sonal Sharma; Tasnim Trivedi; Tushar Toprani; Zarna Patel                                                                                                                                                                                      |
| EPI_ISL_9438060, EPI_ISL_9551562                                                                                                                                                                                                             | Tripler Army Medical Center<br>Tulane University School of Medicine         | Tripler Army Medical Center<br>Tulane University School of Medicine                                                                                                                       | Jonathan Andrew D'Ambrozio and Kendra Carter<br>Di Tian<br>Giorgio Dirani                                                                                                                                                                                                                                                                                                                                                                                               |
| EPI_ISL_9651247, EPI_ISL_9651251                                                                                                                                                                                                             | U.O. Microbiologia Laboratorio Unico Centro Servizi - AUSL della Romagna    | U.O. Microbiologia, Laboratorio Unico Centro Servizi - AUSL della Romagna                                                                                                                 |                                                                                                                                                                                                                                                                                                                                                                                                                                                                         |
| EPI_ISL_9663265, EPI_ISL_9663280, EPI_ISL_9663296, EPI_ISL_9663301                                                                                                                                                                           | UAB Diagnostikos laboratorija                                               | Institute of Biotechnology, Life Sciences Center, Vilnius University                                                                                                                      | Albertas Timinskas; Alma Gedvilaite; Danguole Ziogiene; Emilija Vasiliunaite; Milda Norkiene                                                                                                                                                                                                                                                                                                                                                                            |
| EPI_ISL_9663380, EPI_ISL_9663435, EPI_ISL_9663440                                                                                                                                                                                            | UAB Diagnostikos laboratorija                                               | Lithuanian University of Health Sciences                                                                                                                                                  | Arnoldas Pautienius; Dovydas Gecys; Emilija Gecyte; Gediminas Alzbutas; Lukas Zemaitis; Vaiva Lesauskaite                                                                                                                                                                                                                                                                                                                                                               |
| EPI_ISL_9606089, EPI_ISL_9606361                                                                                                                                                                                                             | UNILABS                                                                     | Instituto Nacional de Saude (INSA)                                                                                                                                                        | Borges et al                                                                                                                                                                                                                                                                                                                                                                                                                                                            |
| EPI_ISL_9481858, EPI_ISL_9481859                                                                                                                                                                                                             | USC Clinical Lab                                                            | Los Angeles County Public Health Laboratories                                                                                                                                             | A.R. Gener et al.                                                                                                                                                                                                                                                                                                                                                                                                                                                       |
| EPI_ISL_9594596                                                                                                                                                                                                                              | UW Virology Lab                                                             | UW Virology Lab                                                                                                                                                                           | Alexander Greninger; Hong Xie; Isabel Arnould; Keith R Jerome; Meeli-Li Huang; Nathan Breit; Patrick Mathias; Pavitra Roychoudhury; Pooneh Hajian; Ricardo Perez; Robert J. Livingston; Sean Ellis; Seffir T. Wendm; Shah Mohamed Bakhash                                                                                                                                                                                                                               |
| EPI_ISL_9719389, EPI_ISL_9723795, EPI_ISL_9723798, EPI_ISL_9723818                                                                                                                                                                           | Uniklinikum Regensburg; Institut für klinische Mikrobiologie und Hygiene    | Robert Koch Institute                                                                                                                                                                     |                                                                                                                                                                                                                                                                                                                                                                                                                                                                         |
| EPI_ISL_9512556, EPI_ISL_9512726, EPI_ISL_9512790                                                                                                                                                                                            | University Hospitals of Geneva, Laboratory of Virology                      | HUG, Laboratory of Virology and the Health2030 Genome Center                                                                                                                              | Aline Mamin; Ana Rita Goncalves; Cedric Howald; Deborah Penet; Francisco Perez; Henri Pegeot; Ioannis Xenarios; Keith Harshman; Laurent Kaiser; Lorenzo Cerutti; Melyssa Elies; Samuel Cordcy                                                                                                                                                                                                                                                                           |
| EPI_ISL_9625289, EPI_ISL_9625324                                                                                                                                                                                                             | University of Wisconsin-Madison AIDS Vaccine Research Laboratories          | University of Wisconsin-Madison AIDS Vaccine Research Laboratories                                                                                                                        | Gage Moreno; Katarina Braun; et al. AIDS Vaccine Research Laboratories                                                                                                                                                                                                                                                                                                                                                                                                  |
| EPI_ISL_9439365, EPI_ISL_9439370, EPI_ISL_9439388                                                                                                                                                                                            | Università degli Studi di Perugia                                           | Istituto Zooprofilattico Sperimentale dell'Abruzzo e Molise "G. Caporale"                                                                                                                 | Ancora M; Biagetti M; Calistri P; Camilloni B; Cammà C; Curini V; Delli Compagni E; Di Domenico M; Di Pasquale A; Giammarioli M; Lorusso A; Mangone I; Marcacci M; Mencacci A; Puglia I; Rinaldi A; Savini G; Scialabba S                                                                                                                                                                                                                                               |
| EPI_ISL_9622730                                                                                                                                                                                                                              | Universität Zürich                                                          | Institute of Medical Virology, University of Zurich                                                                                                                                       | Alexandra Trkola; Annette Audigé; Catharine Aquino; Cyril Shah; Daniel Ehrsam; Gabriela Ziltener; Guido Bloemberg; Hubert Rehrauer; Isabel Stürmer; Joel Wirz; Jon Huder; Jürg Böni; Kevin Steiner; Maria Grünberg; Maryam Zaheri; Michael Huber; Riccarda Capaul; Stefan Schmutz; Verena Kufner; Weihong Qi                                                                                                                                                            |
| EPI_ISL_9622540                                                                                                                                                                                                                              | Universitäts-Kinderspital Zürich                                            | Institute of Medical Virology, University of Zurich                                                                                                                                       | Alexandra Trkola; Annette Audigé; Catharine Aquino; Cyril Shah; Daniel Ehrsam; Gabriela Ziltener; Guido Bloemberg; Hubert Rehrauer; Isabel Stürmer; Joel Wirz; Jon Huder; Jürg Böni; Kevin Steiner; Maria Grünberg; Maryam Zaheri; Michael Huber; Riccarda Capaul; Stefan Schmutz; Verena Kufner; Weihong Qi                                                                                                                                                            |
| EPI_ISL_9441494, EPI_ISL_9614380, EPI_ISL_9614442, EPI_ISL_9614493, EPI_ISL_9614497, EPI_ISL_9614505, EPI_ISL_9622475                                                                                                                        |                                                                             |                                                                                                                                                                                           |                                                                                                                                                                                                                                                                                                                                                                                                                                                                         |

|                                                                                                                                                                                                                                                                                                                                                                      |                                                                                                                                   |                                                                                                                                                                                                                      |                                                                                                                                                                                                                                                                                                                                                                                                                                                                                                                                                                                                                                                                                                          |
|----------------------------------------------------------------------------------------------------------------------------------------------------------------------------------------------------------------------------------------------------------------------------------------------------------------------------------------------------------------------|-----------------------------------------------------------------------------------------------------------------------------------|----------------------------------------------------------------------------------------------------------------------------------------------------------------------------------------------------------------------|----------------------------------------------------------------------------------------------------------------------------------------------------------------------------------------------------------------------------------------------------------------------------------------------------------------------------------------------------------------------------------------------------------------------------------------------------------------------------------------------------------------------------------------------------------------------------------------------------------------------------------------------------------------------------------------------------------|
| see above                                                                                                                                                                                                                                                                                                                                                            | UniversitätsSpital Zürich                                                                                                         | Institute of Medical Virology, University of Zurich                                                                                                                                                                  | Alexandra Trkola; Annette Audigé; Catharine Aquino; Cyril Shah; Daniel Ehrsam; Gabriela Ziltener; Guido Bloemberg; Hubert Rehrauer; Isabel Stürmer; Joel Wirz; Jon Huder; Jürg Böni; Kevin Steiner; Maria Grünberg; Maryam Zaheri; Michael Huber; Riccarda Capaul; Stefan Schmutz; Verena Kufner; Weihong Qi                                                                                                                                                                                                                                                                                                                                                                                             |
| EPI_ISL_9445263                                                                                                                                                                                                                                                                                                                                                      | Universitätsklinikum Frankfurt - Institut für Medizinische Virologie                                                              | Robert Koch Institute                                                                                                                                                                                                |                                                                                                                                                                                                                                                                                                                                                                                                                                                                                                                                                                                                                                                                                                          |
| EPI_ISL_9714330                                                                                                                                                                                                                                                                                                                                                      | Universitätsklinikum Münster Institut für Virologie                                                                               | Robert Koch Institute                                                                                                                                                                                                |                                                                                                                                                                                                                                                                                                                                                                                                                                                                                                                                                                                                                                                                                                          |
| EPI_ISL_9706095                                                                                                                                                                                                                                                                                                                                                      | Uniwersytecki Szpital Kliniczny we Wrocławiu                                                                                      | 416. Tricity SARS-CoV-2 sequencing consortium: University of Gdansk, Medical University of Gdansk, Vaxican Ltd., Invicta Ltd. 2. National Institute of Public Health - National Institute of Hygiene, Warsaw, Poland | Celina Cybulska; Karolina Gackowska; Katarzyna Groth; Katarzyna Zacharczuk; Krystyna Bienkowska Szewczyk; Lukasz Rabalski; Maciej Grzybek; Maciej Kosinski; Magdalena Nowakowska; Marcin Lubocki; Małgorzata Sadkowska-Todys; Tomasz Wołkowicz                                                                                                                                                                                                                                                                                                                                                                                                                                                           |
| EPI_ISL_9673487                                                                                                                                                                                                                                                                                                                                                      | Uniwersyteckie Centrum Kliniczne                                                                                                  | 1. Tricity SARS-CoV-2 sequencing consortium: University of Gdansk, Medical University of Gdansk, Vaxican Ltd., Invicta Ltd. 2. National Institute of Public Health - National Institute of Hygiene, Warsaw, Poland   | Celina Cybulska; Karolina Gackowska; Katarzyna Groth; Katarzyna Zacharczuk; Krystyna Bienkowska Szewczyk; Lukasz Rabalski; Maciej Grzybek; Maciej Kosinski; Magdalena Nowakowska; Marcin Lubocki; Małgorzata Sadkowska-Todys; Tomasz Wołkowicz                                                                                                                                                                                                                                                                                                                                                                                                                                                           |
| EPI_ISL_9712671,<br>EPI_ISL_9712673,<br>EPI_ISL_9712676                                                                                                                                                                                                                                                                                                              | Uniwersytet Medyczny im. Karola Marcinkowskiego w Poznaniu                                                                        | 1. Academic Center for Pathomorphological and Genetic-Molecular Diagnostics Ltd, Białystok, Poland 2. National Institute of Public Health - National Institute of Hygiene, Warsaw, Poland                            | Anetta Sulewska; Jacek Nikliński; Janusz Dzieciol; Joanna Kiśluk; Katarzyna Zacharczuk; Konrad Raczkowski; Magdalena Nowakowska; Małgorzata Sadkowska-Todys; Piotr Karabowicz; Piotr Majewski; Przemysław Biecek; Joanna Reszeć; Radosław Charkiewicz; Tomasz Wołkowicz                                                                                                                                                                                                                                                                                                                                                                                                                                  |
| EPI_ISL_9612145                                                                                                                                                                                                                                                                                                                                                      | Valais Hospital, Central Institute                                                                                                | Valais Hospital, Central Institute                                                                                                                                                                                   | Alexis Dumoulin; Cedric Howald; Deborah Penet; Henri Pegeot; Ioannis Xenarios; Keith Harshman; Lorenzo Cerutti; Melyssa Elies                                                                                                                                                                                                                                                                                                                                                                                                                                                                                                                                                                            |
| EPI_ISL_9771782, EPI_ISL_9771791, EPI_ISL_9771801, EPI_ISL_9771903, EPI_ISL_9771908, EPI_ISL_9771936, EPI_ISL_9771960, EPI_ISL_9771969, EPI_ISL_9772021, EPI_ISL_9772076, EPI_ISL_9772263, EPI_ISL_9772267, EPI_ISL_9772269, EPI_ISL_9772288, EPI_ISL_9772294, EPI_ISL_9772306, EPI_ISL_9772307, EPI_ISL_9772686, EPI_ISL_9772705, EPI_ISL_9772818, EPI_ISL_9772840, |                                                                                                                                   |                                                                                                                                                                                                                      |                                                                                                                                                                                                                                                                                                                                                                                                                                                                                                                                                                                                                                                                                                          |
| see above                                                                                                                                                                                                                                                                                                                                                            | Viollier AG                                                                                                                       | Department of Biosystems Science and Engineering, ETH Zürich                                                                                                                                                         | Andrea Patrignani; Andrea Patrizia Salzmann; Andrea Cabral de Gouvea; Catharine Aquino Fournier; Chaoran Chen; Christian Urban; Christiane Beckmann; Christoph Noppen; Daniel Ehrsam; David Dreifuss; Doris Popovic; Franziska Singer; Griffin White; Hai Bui; Henriette Kurth; Isabel Stürmer; Ivan Topolsky; Jay Tracy; Kim Philipp Jablonski; Lara Fuhrmann; Laura Neff; Lennart Opitz; Louis du Plessis; Maria Domenica Moccia; Matteo Carrara; Maurice Redondo; Niko Beerenwinkel; Olivier Kobel; Pelin Icer; Ralph Schlapbach; Sarah Nadeau; Shuqing Yu; Simon Grüter; Tanja Stadler; Timothy Sykes                                                                                                |
| EPI_ISL_9588352,<br>EPI_ISL_9588355,<br>EPI_ISL_9588369,<br>EPI_ISL_9588370                                                                                                                                                                                                                                                                                          | Virology Laboratory, International Centre for Diarrhoeal Disease Research, Bangladesh (ICDDR,B)                                   | Virology Laboratory, International Centre for Diarrhoeal Disease Research, Bangladesh (ICDDR,B)                                                                                                                      | ASM Alamgir; Ahmed Nawsher Alam; Dinesh Mondal; Firdausi Qadri; Hassan Afrad; Mahbubur Rahman; Manjur Hossain Khan; Md. Mahfuzur Rahman; Mohammad Enayet Hossain; Mohammad Jubair; Mohammad Shahidul Islam; Mohammed Ziaur Rahman; Mojuu Miah; Mustafizur Rahman; Rashedul Hasan; Razib Mazumder; Samir Kumar Saha; Senjuti Saha; Tahmina Shirin                                                                                                                                                                                                                                                                                                                                                         |
| EPI_ISL_9463556, EPI_ISL_9463557, EPI_ISL_9463558, EPI_ISL_9463573, EPI_ISL_9463576, EPI_ISL_9463578, EPI_ISL_9463585                                                                                                                                                                                                                                                |                                                                                                                                   |                                                                                                                                                                                                                      |                                                                                                                                                                                                                                                                                                                                                                                                                                                                                                                                                                                                                                                                                                          |
| see above                                                                                                                                                                                                                                                                                                                                                            | Virology Unit, Institut Pasteur du Cambodge                                                                                       | Virology Unit, Institut Pasteur du Cambodge                                                                                                                                                                          | Cecile Troupin; Chau Darapheak; Chin Savuth; Erik A Karlsson; Jurre Y Siegers; Kraing Sidonn; Leakhena Pum; Ly Sovann; Sophonnadeth Rath; Veasna Duong; Yi Sengdoeurn                                                                                                                                                                                                                                                                                                                                                                                                                                                                                                                                    |
| EPI_ISL_9482536                                                                                                                                                                                                                                                                                                                                                      | Virology, Universitätsklinikum des Saarlandes                                                                                     | Epigenetics, Saarland University                                                                                                                                                                                     | Barbara Berko-Göttel Sascha Tierling; Jörn Walter; Kathrin Kattler; Signrun Smola; Thorsten Pfuhl                                                                                                                                                                                                                                                                                                                                                                                                                                                                                                                                                                                                        |
| EPI_ISL_9688133                                                                                                                                                                                                                                                                                                                                                      | WSSE w Białymstoku - laboratorium                                                                                                 | 1. Academic Center for Pathomorphological and Genetic-Molecular Diagnostics Ltd, Białystok, Poland 2. National Institute of Public Health - National Institute of Hygiene, Warsaw, Poland                            | Anetta Sulewska; Jacek Nikliński; Janusz Dzieciol; Joanna Kiśluk; Katarzyna Zacharczuk; Konrad Raczkowski; Magdalena Nowakowska; Małgorzata Sadkowska-Todys; Piotr Karabowicz; Piotr Majewski; Przemysław Biecek; Joanna Reszeć; Radosław Charkiewicz; Tomasz Wołkowicz                                                                                                                                                                                                                                                                                                                                                                                                                                  |
| EPI_ISL_9754900, EPI_ISL_9754920, EPI_ISL_9754923, EPI_ISL_9754924, EPI_ISL_9754925, EPI_ISL_9754929, EPI_ISL_9754933, EPI_ISL_9754935, EPI_ISL_9754943, EPI_ISL_9754945, EPI_ISL_9754948, EPI_ISL_9754958, EPI_ISL_9754964, EPI_ISL_9754965, EPI_ISL_9754971, EPI_ISL_9754975                                                                                       | see above                                                                                                                         | WSSE w Bydgoszczy                                                                                                                                                                                                    | Aleksandra Kobiatko; Barbara Dolinska; Emilia Tarabas; Ewa Liszewska; Marta Lukian; Monika Czerminka; Patryk Bielecki; Paulina Rozycka; Sylwia Krzetowska; Tomasz Jakubczak                                                                                                                                                                                                                                                                                                                                                                                                                                                                                                                              |
| EPI_ISL_9752411, EPI_ISL_9752424, EPI_ISL_9752436, EPI_ISL_9752441, EPI_ISL_9752455, EPI_ISL_9752459, EPI_ISL_9754188, EPI_ISL_9754190, EPI_ISL_9754191, EPI_ISL_9754243, EPI_ISL_9754245, EPI_ISL_9754246                                                                                                                                                           | see above                                                                                                                         | WSSE w Olsztynie                                                                                                                                                                                                     | Aleksandra Kobiatko; Barbara Dolinska; Emilia Tarabas; Ewa Liszewska; Marta Lukian; Monika Czerminka; Patryk Bielecki; Paulina Rozycka; Sylwia Krzetowska; Tomasz Jakubczak                                                                                                                                                                                                                                                                                                                                                                                                                                                                                                                              |
| EPI_ISL_9712814                                                                                                                                                                                                                                                                                                                                                      | WSSE w Poznaniu. Laboratorium Mikrobiologii i Parazytologii                                                                       | 1. Academic Center for Pathomorphological and Genetic-Molecular Diagnostics Ltd, Białystok, Poland 2. National Institute of Public Health - National Institute of Hygiene, Warsaw, Poland                            | Anetta Sulewska; Jacek Nikliński; Janusz Dzieciol; Joanna Kiśluk; Katarzyna Zacharczuk; Konrad Raczkowski; Magdalena Nowakowska; Małgorzata Sadkowska-Todys; Piotr Karabowicz; Piotr Majewski; Przemysław Biecek; Joanna Reszeć; Radosław Charkiewicz; Tomasz Wołkowicz                                                                                                                                                                                                                                                                                                                                                                                                                                  |
| EPI_ISL_9636574                                                                                                                                                                                                                                                                                                                                                      | Waikato Hospital                                                                                                                  | Institute of Environmental Science and Research (ESR)                                                                                                                                                                | Anja Werno; Antje van der Linden; Arlo Upton; Chris Mansell; Clare Gebbie; David Hamner; Dhanisha Patel; Dragana Drinkovic; Erasmus Smit; Gary McAuliffe; Hana Sofia Andersson; Hermes Perez; James Ussher; Jill Sherwood; Jing Wang; Joep de Lig; Josh Freeman; Julia Howard; Juliet Elvy; Lauren Jelly; Mary DeAlmeida; Matt Blakiston; Matt Storey; Matthew Rogers; Max Bloomfield; Michael Addidle; Michelle Balm; Muhammad Faisal; Nikki Freed; Olin Silander; Olivia Stroeven; Rachel Boyle; Sally Roberts; SallyAnn Harbison; Sarah Cockerton; Sarah Jefferies; Sharmini Muttaiyah; Susan Morpeth; Susan Taylor; Timothy Blackmore; Vani Sathyendran; Veronica Playle; Virginia Hope; Xiaoyun Ren |
| EPI_ISL_9579660                                                                                                                                                                                                                                                                                                                                                      | Washington State Department of Health Public Health Laboratories                                                                  | Washington State Department of Health Public Health Laboratories                                                                                                                                                     | Alex Latham; Ardizon Valdez; Avi Singh; Claire Howell; Denny Russell; Drew MacKellar; Holly Halstead; JohnAric Peterson; Kathryn Sickle; Kristin Roche; Lisa Jones; Philip Dykema; Rebecca Cao                                                                                                                                                                                                                                                                                                                                                                                                                                                                                                           |
| EPI_ISL_9402830,<br>EPI_ISL_9402831                                                                                                                                                                                                                                                                                                                                  | We Path Genexplore Laboratory, Vadodara                                                                                           | Gujarat Biotechnology Research Centre                                                                                                                                                                                | Akhlesh Modi; Apurvashin Puvar; Bhadeshsinh Gohil; Chaitanya Joshi; Disha Vora; Janvi Raval; Jaykumar Rangani; Madhvi Joshi; Nimesh Patel; Nitin Savaliya; NitinShukla; Priyank Chavda; Ramesh Pandit; Roshani Mishra; Sonal Sharma; Tasnim Trivedi; Twinkle Dhamecha; Zarna Patel                                                                                                                                                                                                                                                                                                                                                                                                                       |
| EPI_ISL_9636713                                                                                                                                                                                                                                                                                                                                                      | Wellington SCL (WN)                                                                                                               | Institute of Environmental Science and Research (ESR)                                                                                                                                                                | Anja Werno; Antje van der Linden; Arlo Upton; Chris Mansell; Clare Gebbie; David Hamner; Dhanisha Patel; Dragana Drinkovic; Erasmus Smit; Gary McAuliffe; Hana Sofia Andersson; Hermes Perez; James Ussher; Jill Sherwood; Jing Wang; Joep de Lig; Josh Freeman; Julia Howard; Juliet Elvy; Lauren Jelly; Mary DeAlmeida; Matt Blakiston; Matt Storey; Matthew Rogers; Max Bloomfield; Michael Addidle; Michelle Balm; Muhammad Faisal; Nikki Freed; Olin Silander; Olivia Stroeven; Rachel Boyle; Sally Roberts; SallyAnn Harbison; Sarah Cockerton; Sarah Jefferies; Sharmini Muttaiyah; Susan Morpeth; Susan Taylor; Timothy Blackmore; Vani Sathyendran; Veronica Playle; Virginia Hope; Xiaoyun Ren |
| EPI_ISL_9612852,<br>EPI_ISL_9612858,<br>EPI_ISL_9612862                                                                                                                                                                                                                                                                                                              | Wojewodski Specjalistyczny Szpital im. Dr. Wl. Bieganskiego                                                                       | Wojewodzka Stacja Sanitarno-Epidemiologiczna w Lodzi, Oddzial Laboratoryjny Mikrobiologii i Parazytologii                                                                                                            | Agnieszka Karnowska; Aleksandra Krawczyk; Danuta Bartczak; Elian Terpo; Katarzyna Kosowska; Lucyna Kochanowska; Marta Gawronska; Martyna Matera; Szymon Konkolewski                                                                                                                                                                                                                                                                                                                                                                                                                                                                                                                                      |
| EPI_ISL_9712728,<br>EPI_ISL_9712731,<br>EPI_ISL_9712732,<br>EPI_ISL_9712740                                                                                                                                                                                                                                                                                          | Wojewódzki Szpital Zespolony im. dr. Romana Ostrzyckiego w Koninie Zakład Mikrobiologii Klinicznej, ul. Szpitalna 45 62-504 Konin | 1. Academic Center for Pathomorphological and Genetic-Molecular Diagnostics Ltd, Białystok, Poland 2. National Institute of Public Health - National Institute of Hygiene, Warsaw, Poland                            | Anetta Sulewska; Jacek Nikliński; Janusz Dzieciol; Joanna Kiśluk; Katarzyna Zacharczuk; Konrad Raczkowski; Magdalena Nowakowska; Małgorzata Sadkowska-Todys; Piotr Karabowicz; Piotr Majewski; Przemysław Biecek; Joanna Reszeć; Radosław Charkiewicz; Tomasz Wołkowicz                                                                                                                                                                                                                                                                                                                                                                                                                                  |
| EPI_ISL_9712754,<br>EPI_ISL_9712764,<br>EPI_ISL_9712766,<br>EPI_ISL_9712769,<br>EPI_ISL_9712771                                                                                                                                                                                                                                                                      | Wojewódzki Szpital Zespolony w Lesznie                                                                                            | 1. Academic Center for Pathomorphological and Genetic-Molecular Diagnostics Ltd, Białystok, Poland 2. National Institute of Public Health - National Institute of Hygiene, Warsaw, Poland                            | Anetta Sulewska; Jacek Nikliński; Janusz Dzieciol; Joanna Kiśluk; Katarzyna Zacharczuk; Konrad Raczkowski; Magdalena Nowakowska; Małgorzata Sadkowska-Todys; Piotr Karabowicz; Piotr Majewski; Przemysław Biecek; Joanna Reszeć; Radosław Charkiewicz; Tomasz Wołkowicz                                                                                                                                                                                                                                                                                                                                                                                                                                  |
| EPI_ISL_9274892                                                                                                                                                                                                                                                                                                                                                      | Yale Pathology Labs                                                                                                               | Yale Pathology Labs                                                                                                                                                                                                  | Angelique Levi; Brian Daley; Carmen Hernández; Chen Liu; Guangxiao Yang; Heidi Herrick; Jennifer Dobas; Jianhui Wang; Jinglan Wang; John Sinar; Katherine Fajardo; Kevin Schofield; Kien Pham; Kristina Gordy; Laura Brady; Laxiang Wan; Lyndsey Gress; Michael Stankewich; Minghao Zhong; Monica Talmor; Pei Hui; Peter Gershkovich; Philip Galullo; Sam DeFina; Stephanie Weirsman; Susan Bell; Sylvia White; Vikram Kapoor                                                                                                                                                                                                                                                                            |
| EPI_ISL_9184332                                                                                                                                                                                                                                                                                                                                                      | ZOL                                                                                                                               | Jessa                                                                                                                                                                                                                | Severine Berden et al. on behalf of the Jessa_cmdLab                                                                                                                                                                                                                                                                                                                                                                                                                                                                                                                                                                                                                                                     |
| EPI_ISL_9712866                                                                                                                                                                                                                                                                                                                                                      | Zakład Diagnostyki Medycznej Sp. z o.o.                                                                                           | 1. Academic Center for Pathomorphological and Genetic-Molecular Diagnostics Ltd, Białystok, Poland 2. National Institute of Public Health - National Institute of Hygiene, Warsaw, Poland                            | Anetta Sulewska; Jacek Nikliński; Janusz Dzieciol; Joanna Kiśluk; Katarzyna Zacharczuk; Konrad Raczkowski; Magdalena Nowakowska; Małgorzata Sadkowska-Todys; Piotr Karabowicz; Piotr Majewski; Przemysław Biecek; Joanna Reszeć; Radosław Charkiewicz; Tomasz Wołkowicz                                                                                                                                                                                                                                                                                                                                                                                                                                  |
| EPI_ISL_9712872                                                                                                                                                                                                                                                                                                                                                      | Zakład Mikrobiologii, Wojewódzki Specjalistyczny ZZOZ Chorób Pluc i Gruzlicy w Wolicy k. Kalisza                                  | 1. Academic Center for Pathomorphological and Genetic-Molecular Diagnostics Ltd, Białystok, Poland 2. National Institute of Public Health - National Institute of Hygiene, Warsaw, Poland                            | Anetta Sulewska; Jacek Nikliński; Janusz Dzieciol; Joanna Kiśluk; Katarzyna Zacharczuk; Konrad Raczkowski; Magdalena Nowakowska; Małgorzata Sadkowska-Todys; Piotr Karabowicz; Piotr Majewski; Przemysław Biecek; Joanna Reszeć; Radosław Charkiewicz; Tomasz Wołkowicz                                                                                                                                                                                                                                                                                                                                                                                                                                  |
| EPI_ISL_9663352                                                                                                                                                                                                                                                                                                                                                      | Zdravotni ústav Ústí nad Labem                                                                                                    | Institute of Medical Microbiology and Virology, University Hospital Carl Gustav Carus, TU Dresden                                                                                                                    | Alexa Laubner; Alexander Dalpke; Anett Zabzinski; Eva Patrasová; Fabian Rost; Grit Mehnert; Ivana Stiborová; Jitka Pohořská; Lenka Šimůnková; Marlana Stadtmüller; Montserrat Palau de Miquel; Romana Mikešová; Susanne Reinhardt; Sylke Winkler; Sylvia Klemroth                                                                                                                                                                                                                                                                                                                                                                                                                                        |
| EPI_ISL_9452400                                                                                                                                                                                                                                                                                                                                                      | alphaomega Labor GbR (Medizinische Kooperationsgemeinschaft Dres. Ackermann/Tennert/Zai8)                                         | Robert Koch Institute                                                                                                                                                                                                |                                                                                                                                                                                                                                                                                                                                                                                                                                                                                                                                                                                                                                                                                                          |
| EPI_ISL_9746791, EPI_ISL_9746825, EPI_ISL_9746842, EPI_ISL_9747023, EPI_ISL_9747058, EPI_ISL_9747114, EPI_ISL_9747325, EPI_ISL_9747410, EPI_ISL_9747420, EPI_ISL_9747433, EPI_ISL_9747464                                                                                                                                                                            |                                                                                                                                   |                                                                                                                                                                                                                      |                                                                                                                                                                                                                                                                                                                                                                                                                                                                                                                                                                                                                                                                                                          |
| see above                                                                                                                                                                                                                                                                                                                                                            | amedes MVZ DIAMEDIS Sennestadt                                                                                                    | Robert Koch Institute                                                                                                                                                                                                |                                                                                                                                                                                                                                                                                                                                                                                                                                                                                                                                                                                                                                                                                                          |
| EPI_ISL_9719888,<br>EPI_ISL_9719896,<br>EPI_ISL_9719904,<br>EPI_ISL_9719932,<br>EPI_ISL_9719980                                                                                                                                                                                                                                                                      | amedes MVZ Jena                                                                                                                   | Robert Koch Institute                                                                                                                                                                                                |                                                                                                                                                                                                                                                                                                                                                                                                                                                                                                                                                                                                                                                                                                          |
| EPI_ISL_9719887,<br>EPI_ISL_9719900,<br>EPI_ISL_9719921,<br>EPI_ISL_9719927                                                                                                                                                                                                                                                                                          | amedes Medlab Arnold Analytik MVZ GmbH                                                                                            | Robert Koch Institute                                                                                                                                                                                                |                                                                                                                                                                                                                                                                                                                                                                                                                                                                                                                                                                                                                                                                                                          |
| EPI_ISL_9748945                                                                                                                                                                                                                                                                                                                                                      | cmd siedlce                                                                                                                       | 1. Academic Center for Pathomorphological and Genetic-Molecular Diagnostics Ltd, Białystok, Poland 2. National Institute of Public Health - National Institute of Hygiene, Warsaw, Poland                            | Anetta Sulewska; Jacek Nikliński; Janusz Dzieciol; Joanna Kiśluk; Katarzyna Zacharczuk; Konrad Raczkowski; Magdalena Nowakowska; Małgorzata Sadkowska-Todys; Piotr Karabowicz; Piotr Majewski; Przemysław Biecek; Joanna Reszeć; Radosław Charkiewicz; Tomasz Wołkowicz                                                                                                                                                                                                                                                                                                                                                                                                                                  |
| EPI_ISL_9725969, EPI_ISL_9725987, EPI_ISL_9726000, EPI_ISL_9726241, EPI_ISL_9726244, EPI_ISL_9726250, EPI_ISL_9726253, EPI_ISL_9726263, EPI_ISL_9726278, EPI_ISL_9726300, EPI_ISL_9726312, EPI_ISL_9726319, EPI_ISL_9726390, EPI_ISL_9726565, EPI_ISL_9726579, EPI_ISL_9726618                                                                                       |                                                                                                                                   |                                                                                                                                                                                                                      |                                                                                                                                                                                                                                                                                                                                                                                                                                                                                                                                                                                                                                                                                                          |
| see above                                                                                                                                                                                                                                                                                                                                                            | labopart - Medizinische Laboratorien Dresden                                                                                      | Robert Koch Institute                                                                                                                                                                                                |                                                                                                                                                                                                                                                                                                                                                                                                                                                                                                                                                                                                                                                                                                          |

We gratefully acknowledge the following Authors from the Originating laboratories responsible for obtaining the specimens, as well as the Submitting laboratories where the genome data were generated and shared via GISAID, on which this research is based.

All Submitters of data may be contacted directly via [www.gisaid.org](http://www.gisaid.org)

Authors are sorted alphabetically.

| Accession ID                                                                                                                                                                                                                                                                                                                                                                                                                                                                                                                                                                                                                                                                                                                                                                                                                                                                                                                                                                                                                                                                                                                                                                                                                                                                                                                                                                                                                                                                                                                                                                                                                                                                                                                                                                                                                                                                                                                                                                                                                                                                                                                                                                                                                                                                                                                                                                                                                                                                                                                                                                                                                                                                                                                                                                                                                                                                                                                                                                                                                                                                                                                                                                                                                                                                                                                                                                                                                                                                                                                                                                                                                                                                                                                                                                                                                                                                                                                                                                                                                                                                                                                                                                                                                                                                                                                                                                                                                                                                                                                                                                                                                                                                                                                                                                                                                                                                                                                                                                                                                                                                                                                                                                                                                                                                                                                                                                                                                                                                                                                                                                                                                                                                                                                                                                                                                                                                                                                                                                                                                                                                                                                                                                                                                                                                                                                                                                                                                                                                                                                                                                                                                                                                                                                                                                                                                                                                                                                                                                                                                                                                                                                                                                                                                                                                                                                                                                                                                                                                                                                                                                                                                                                                                                                                                                                                                                                                                                                                                                                                                                                                                                                                                                                                                                                                                                                                                                                                                                                                                                                                                                                                                                                                                                                                                                                                                                                                                                                                                                                                                                                                                                                                                                                                                                                                                                                                                                                                                                                                                                                                                                                                                                                                                                                                                                                                                                                                                                                                                                                                                                                                                                                                                                                                                                                                                                                                                                                                                                                                                                                                                                                                                                                                                                                                                                                                                                                                                                                                                                                                                                                                                                                                                                                                                                                                                                                                                                                                                                                                                                                                                                                                                                                                                                                                                                                                                                                                                                                                                                                                                                                                       | Originating Laboratory                                                                                                                                                                                                                                                                                                                                       | Submitting Laboratory                                                                                                                                                                                                                                                                                                                                                                                                                                                                                                                                                                                                    | Authors                                                                                                                                                                                                                                                                                                                                                                                                                                                                                                                                                                                                                                                                                                                                                                                                                                                                                                                                                                                                                                                                                                                                                                                            |
|------------------------------------------------------------------------------------------------------------------------------------------------------------------------------------------------------------------------------------------------------------------------------------------------------------------------------------------------------------------------------------------------------------------------------------------------------------------------------------------------------------------------------------------------------------------------------------------------------------------------------------------------------------------------------------------------------------------------------------------------------------------------------------------------------------------------------------------------------------------------------------------------------------------------------------------------------------------------------------------------------------------------------------------------------------------------------------------------------------------------------------------------------------------------------------------------------------------------------------------------------------------------------------------------------------------------------------------------------------------------------------------------------------------------------------------------------------------------------------------------------------------------------------------------------------------------------------------------------------------------------------------------------------------------------------------------------------------------------------------------------------------------------------------------------------------------------------------------------------------------------------------------------------------------------------------------------------------------------------------------------------------------------------------------------------------------------------------------------------------------------------------------------------------------------------------------------------------------------------------------------------------------------------------------------------------------------------------------------------------------------------------------------------------------------------------------------------------------------------------------------------------------------------------------------------------------------------------------------------------------------------------------------------------------------------------------------------------------------------------------------------------------------------------------------------------------------------------------------------------------------------------------------------------------------------------------------------------------------------------------------------------------------------------------------------------------------------------------------------------------------------------------------------------------------------------------------------------------------------------------------------------------------------------------------------------------------------------------------------------------------------------------------------------------------------------------------------------------------------------------------------------------------------------------------------------------------------------------------------------------------------------------------------------------------------------------------------------------------------------------------------------------------------------------------------------------------------------------------------------------------------------------------------------------------------------------------------------------------------------------------------------------------------------------------------------------------------------------------------------------------------------------------------------------------------------------------------------------------------------------------------------------------------------------------------------------------------------------------------------------------------------------------------------------------------------------------------------------------------------------------------------------------------------------------------------------------------------------------------------------------------------------------------------------------------------------------------------------------------------------------------------------------------------------------------------------------------------------------------------------------------------------------------------------------------------------------------------------------------------------------------------------------------------------------------------------------------------------------------------------------------------------------------------------------------------------------------------------------------------------------------------------------------------------------------------------------------------------------------------------------------------------------------------------------------------------------------------------------------------------------------------------------------------------------------------------------------------------------------------------------------------------------------------------------------------------------------------------------------------------------------------------------------------------------------------------------------------------------------------------------------------------------------------------------------------------------------------------------------------------------------------------------------------------------------------------------------------------------------------------------------------------------------------------------------------------------------------------------------------------------------------------------------------------------------------------------------------------------------------------------------------------------------------------------------------------------------------------------------------------------------------------------------------------------------------------------------------------------------------------------------------------------------------------------------------------------------------------------------------------------------------------------------------------------------------------------------------------------------------------------------------------------------------------------------------------------------------------------------------------------------------------------------------------------------------------------------------------------------------------------------------------------------------------------------------------------------------------------------------------------------------------------------------------------------------------------------------------------------------------------------------------------------------------------------------------------------------------------------------------------------------------------------------------------------------------------------------------------------------------------------------------------------------------------------------------------------------------------------------------------------------------------------------------------------------------------------------------------------------------------------------------------------------------------------------------------------------------------------------------------------------------------------------------------------------------------------------------------------------------------------------------------------------------------------------------------------------------------------------------------------------------------------------------------------------------------------------------------------------------------------------------------------------------------------------------------------------------------------------------------------------------------------------------------------------------------------------------------------------------------------------------------------------------------------------------------------------------------------------------------------------------------------------------------------------------------------------------------------------------------------------------------------------------------------------------------------------------------------------------------------------------------------------------------------------------------------------------------------------------------------------------------------------------------------------------------------------------------------------------------------------------------------------------------------------------------------------------------------------------------------------------------------------------------------------------------------------------------------------------------------------------------------------------------------------------------------------------------------------------------------------------------------------------------------------------------------------------------------------------------------------------------------------------------------------------------------------------------------------------------------------------------------------------------------------------------------------------------------------------------------------------------------------------------------------------------------------------------------------------------------------------------------------------------------------------------------------------------------------------------------------------------------------------------------------------------------------------------------------------------------------------------------------------------------------------------------------------------------------------------------------------------------------------------------------------------------------------------------------------------------------------------------------------------------------------------------------------------------------------------------------------------------------------------------------------------------------------------------------------------------------------------------------------------------------------------------------------------------------------------------------------------------------------------------------------------------------------------------------------------------------------------------------------------------------------------------------------------------------------------------------------------------------------------------------------------------------------------------------------------------------------------------------------------------------------------------------------------------------------------------------------------------------------------------------------------------------------------------------------------------------------------------------------------------------------------------------------------------------------------------------------------------------------------------------------------------------------------------------------------------------------------------------------------------------------------------------------------------------------------------------------------------------------------------------------------------|--------------------------------------------------------------------------------------------------------------------------------------------------------------------------------------------------------------------------------------------------------------------------------------------------------------------------------------------------------------|--------------------------------------------------------------------------------------------------------------------------------------------------------------------------------------------------------------------------------------------------------------------------------------------------------------------------------------------------------------------------------------------------------------------------------------------------------------------------------------------------------------------------------------------------------------------------------------------------------------------------|----------------------------------------------------------------------------------------------------------------------------------------------------------------------------------------------------------------------------------------------------------------------------------------------------------------------------------------------------------------------------------------------------------------------------------------------------------------------------------------------------------------------------------------------------------------------------------------------------------------------------------------------------------------------------------------------------------------------------------------------------------------------------------------------------------------------------------------------------------------------------------------------------------------------------------------------------------------------------------------------------------------------------------------------------------------------------------------------------------------------------------------------------------------------------------------------------|
| EPI_ISL_9796704<br>EPI_ISL_9775322, EPI_ISL_9775324<br>EPI_ISL_9775741<br>EPI_ISL_9713722<br>EPI_ISL_9629565                                                                                                                                                                                                                                                                                                                                                                                                                                                                                                                                                                                                                                                                                                                                                                                                                                                                                                                                                                                                                                                                                                                                                                                                                                                                                                                                                                                                                                                                                                                                                                                                                                                                                                                                                                                                                                                                                                                                                                                                                                                                                                                                                                                                                                                                                                                                                                                                                                                                                                                                                                                                                                                                                                                                                                                                                                                                                                                                                                                                                                                                                                                                                                                                                                                                                                                                                                                                                                                                                                                                                                                                                                                                                                                                                                                                                                                                                                                                                                                                                                                                                                                                                                                                                                                                                                                                                                                                                                                                                                                                                                                                                                                                                                                                                                                                                                                                                                                                                                                                                                                                                                                                                                                                                                                                                                                                                                                                                                                                                                                                                                                                                                                                                                                                                                                                                                                                                                                                                                                                                                                                                                                                                                                                                                                                                                                                                                                                                                                                                                                                                                                                                                                                                                                                                                                                                                                                                                                                                                                                                                                                                                                                                                                                                                                                                                                                                                                                                                                                                                                                                                                                                                                                                                                                                                                                                                                                                                                                                                                                                                                                                                                                                                                                                                                                                                                                                                                                                                                                                                                                                                                                                                                                                                                                                                                                                                                                                                                                                                                                                                                                                                                                                                                                                                                                                                                                                                                                                                                                                                                                                                                                                                                                                                                                                                                                                                                                                                                                                                                                                                                                                                                                                                                                                                                                                                                                                                                                                                                                                                                                                                                                                                                                                                                                                                                                                                                                                                                                                                                                                                                                                                                                                                                                                                                                                                                                                                                                                                                                                                                                                                                                                                                                                                                                                                                                                                                                                                                                                                       | 24530 AU SERVINGE ACCUEIL DES URGENCES<br>A.S.L. ALESSANDRIA<br>A.S.L. NOVARA<br>AOOP<br>AOUC Azienda Ospedaliero-Universitaria Careggi                                                                                                                                                                                                                      | CNR Virus des Infections Respiratoires - France SUD<br>Fondazione del Piemonte per l'Oncologia IRCCS<br>Fondazione del Piemonte per l'Oncologia IRCCS<br>Istituto Zooprofilattico Sperimentale delle Venezie<br>Microbiology and Virology Unit, Florence Careggi University Hospital; Department of Experimental and Clinical Medicine, University of Florence, Florence, Italy                                                                                                                                                                                                                                          | Antonin Bal; Bruno Lina; Bruno Simon; Gregory Destras; Gwendolyne Burfin; Hadrien Regue; Laurence Josset; Martine Valette; Quentin Semanas; Theophile Boyer<br>Antonino Sottile; Giorgio Giardina; Paola Marino; Silvia Brossa<br>Antonino Sottile; Giorgio Giardina; Paola Marino; Silvia Brossa<br>Adelaide Milani; Alessia Schivo; Alice Fusaro; Ambra Pastori; Angela Salomoni; Annalisa Salviato; Antonia Ricci; Calogero Terregino; Edoardo Giussani; Elisa Palumbo; Erika Giorgia Quaranta; Isabella Monne<br>Gianmaria Rossolini                                                                                                                                                                                                                                                                                                                                                                                                                                                                                                                                                                                                                                                           |
| EPI_ISL_9465185<br>EPI_ISL_9713834, EPI_ISL_9713841<br>EPI_ISL_9618245, EPI_ISL_9618246, EPI_ISL_9618247, EPI_ISL_9618248, EPI_ISL_9618249, EPI_ISL_9618250, EPI_ISL_9618251, EPI_ISL_9618252, EPI_ISL_9618253, EPI_ISL_9618254, EPI_ISL_9618256, EPI_ISL_9618257, EPI_ISL_9618258, EPI_ISL_9618259, EPI_ISL_9618260, EPI_ISL_9618261, EPI_ISL_9618263, EPI_ISL_9618264, EPI_ISL_9618265, EPI_ISL_9618266, EPI_ISL_9618267, EPI_ISL_9618268, EPI_ISL_9618269, EPI_ISL_9618270, EPI_ISL_9618271, EPI_ISL_9618272, EPI_ISL_9618275, EPI_ISL_9618276, EPI_ISL_9618278, EPI_ISL_9618279, EPI_ISL_9618283, EPI_ISL_9618284, EPI_ISL_9618285, EPI_ISL_9618295, EPI_ISL_9618302, EPI_ISL_9692956, EPI_ISL_9692957, EPI_ISL_9692958, EPI_ISL_9692959, EPI_ISL_9692960, EPI_ISL_9692974<br>EPI_ISL_9692981, EPI_ISL_9693020<br>see above                                                                                                                                                                                                                                                                                                                                                                                                                                                                                                                                                                                                                                                                                                                                                                                                                                                                                                                                                                                                                                                                                                                                                                                                                                                                                                                                                                                                                                                                                                                                                                                                                                                                                                                                                                                                                                                                                                                                                                                                                                                                                                                                                                                                                                                                                                                                                                                                                                                                                                                                                                                                                                                                                                                                                                                                                                                                                                                                                                                                                                                                                                                                                                                                                                                                                                                                                                                                                                                                                                                                                                                                                                                                                                                                                                                                                                                                                                                                                                                                                                                                                                                                                                                                                                                                                                                                                                                                                                                                                                                                                                                                                                                                                                                                                                                                                                                                                                                                                                                                                                                                                                                                                                                                                                                                                                                                                                                                                                                                                                                                                                                                                                                                                                                                                                                                                                                                                                                                                                                                                                                                                                                                                                                                                                                                                                                                                                                                                                                                                                                                                                                                                                                                                                                                                                                                                                                                                                                                                                                                                                                                                                                                                                                                                                                                                                                                                                                                                                                                                                                                                                                                                                                                                                                                                                                                                                                                                                                                                                                                                                                                                                                                                                                                                                                                                                                                                                                                                                                                                                                                                                                                                                                                                                                                                                                                                                                                                                                                                                                                                                                                                                                                                                                                                                                                                                                                                                                                                                                                                                                                                                                                                                                                                                                                                                                                                                                                                                                                                                                                                                                                                                                                                                                                                                                                                                                                                                                                                                                                                                                                                                                                                                                                                                                                                                                                                                                                                                                                                                                                                                                                                                                                                                                                                                                    | ASST GOM NIGUARDA<br>AULSS 5 Polesana<br>ASST Grande ospedale Metropolitan Niguarda<br>Istituto Zooprofilattico Sperimentale delle Venezie<br>AZ Delta Medical Laboratories in Rooselare, Belgium<br>Gujarat Biotechnology Research Centre                                                                                                                   | ASST Grande ospedale Metropolitan Niguarda<br>Istituto Zooprofilattico Sperimentale delle Venezie<br>AZ Delta Medical Laboratories in Rooselare, Belgium<br>Gujarat Biotechnology Research Centre                                                                                                                                                                                                                                                                                                                                                                                                                        | Alice Nava<br>Adelaide Milani; Alessia Schivo; Alice Fusaro; Ambra Pastori; Angela Salomoni; Annalisa Salviato; Antonia Ricci; Calogero Terregino; Edoardo Giussani; Elisa Palumbo; Erika Giorgia Quaranta; Isabella Monne<br>Dieter De Smet; Frederik Van Hoecke; Geert Martens; Patrick Descheemaeker; on behalf of AZ Delta COVID-19 Genomics core (member of Genomic surveillance of SARS-CoV-2 in Belgium network)<br>Akhilesh Modi; Apurvashin Puvar; Bhadrshreshin Gohil; Chaitanya Joshi; Disha Vora; Janvi Raval; Jaykumar Rangani; Madhvi Joshi; Nimesh Patel; Nitin Savaliya; NitinShukla; Pankti Shah; Priyank Chavda; Ramesh Pandit; Roshani Mishra; Sonal Sharma; Tasnim Trivedi; Zarna Patel                                                                                                                                                                                                                                                                                                                                                                                                                                                                                        |
| EPI_ISL_9579300, EPI_ISL_9579328, EPI_ISL_9579422, EPI_ISL_9579523, EPI_ISL_9625446, EPI_ISL_9702704, EPI_ISL_9702715, EPI_ISL_9702820, EPI_ISL_9702863, EPI_ISL_9702871, EPI_ISL_9702873, EPI_ISL_9702875, EPI_ISL_9702898, EPI_ISL_9702899, EPI_ISL_9703270, EPI_ISL_9703294, EPI_ISL_9703310, EPI_ISL_9703356, EPI_ISL_9703370, EPI_ISL_9703441, EPI_ISL_9703501, EPI_ISL_9754395, EPI_ISL_9754401, EPI_ISL_9754421, EPI_ISL_9754436, EPI_ISL_9754566<br>see above                                                                                                                                                                                                                                                                                                                                                                                                                                                                                                                                                                                                                                                                                                                                                                                                                                                                                                                                                                                                                                                                                                                                                                                                                                                                                                                                                                                                                                                                                                                                                                                                                                                                                                                                                                                                                                                                                                                                                                                                                                                                                                                                                                                                                                                                                                                                                                                                                                                                                                                                                                                                                                                                                                                                                                                                                                                                                                                                                                                                                                                                                                                                                                                                                                                                                                                                                                                                                                                                                                                                                                                                                                                                                                                                                                                                                                                                                                                                                                                                                                                                                                                                                                                                                                                                                                                                                                                                                                                                                                                                                                                                                                                                                                                                                                                                                                                                                                                                                                                                                                                                                                                                                                                                                                                                                                                                                                                                                                                                                                                                                                                                                                                                                                                                                                                                                                                                                                                                                                                                                                                                                                                                                                                                                                                                                                                                                                                                                                                                                                                                                                                                                                                                                                                                                                                                                                                                                                                                                                                                                                                                                                                                                                                                                                                                                                                                                                                                                                                                                                                                                                                                                                                                                                                                                                                                                                                                                                                                                                                                                                                                                                                                                                                                                                                                                                                                                                                                                                                                                                                                                                                                                                                                                                                                                                                                                                                                                                                                                                                                                                                                                                                                                                                                                                                                                                                                                                                                                                                                                                                                                                                                                                                                                                                                                                                                                                                                                                                                                                                                                                                                                                                                                                                                                                                                                                                                                                                                                                                                                                                                                                                                                                                                                                                                                                                                                                                                                                                                                                                                                                                                                                                                                                                                                                                                                                                                                                                                                                                                                                                                                                                                              | AZDelta<br>Apollo Hospital International Limited, Ahmedabad                                                                                                                                                                                                                                                                                                  | AZ Delta Medical Laboratories in Rooselare, Belgium<br>Gujarat Biotechnology Research Centre                                                                                                                                                                                                                                                                                                                                                                                                                                                                                                                             | Dieter De Smet; Frederik Van Hoecke; Geert Martens; Patrick Descheemaeker; on behalf of AZ Delta COVID-19 Genomics core (member of Genomic surveillance of SARS-CoV-2 in Belgium network)<br>Akhilesh Modi; Apurvashin Puvar; Bhadrshreshin Gohil; Chaitanya Joshi; Disha Vora; Janvi Raval; Jaykumar Rangani; Madhvi Joshi; Nimesh Patel; Nitin Savaliya; NitinShukla; Pankti Shah; Priyank Chavda; Ramesh Pandit; Roshani Mishra; Sonal Sharma; Tasnim Trivedi; Zarna Patel                                                                                                                                                                                                                                                                                                                                                                                                                                                                                                                                                                                                                                                                                                                      |
| EPI_ISL_9616569<br>EPI_ISL_9631528<br>EPI_ISL_9519692, EPI_ISL_9519753<br>EPI_ISL_9604558<br>EPI_ISL_9652519<br>EPI_ISL_9745975<br>EPI_ISL_9804149<br>EPI_ISL_9809014, EPI_ISL_9809015, EPI_ISL_9809027, EPI_ISL_9809124, EPI_ISL_9809232, EPI_ISL_9809361, EPI_ISL_9809438, EPI_ISL_9809680, EPI_ISL_9809703, EPI_ISL_9809712, EPI_ISL_9809843, EPI_ISL_9810082, EPI_ISL_9810095, EPI_ISL_9810116, EPI_ISL_9810154, EPI_ISL_9810350, EPI_ISL_9810509, EPI_ISL_9810555, EPI_ISL_9810814, EPI_ISL_9811020, EPI_ISL_9811087, EPI_ISL_9811206, EPI_ISL_9811429, EPI_ISL_9811546, EPI_ISL_9811565, EPI_ISL_9811576, EPI_ISL_9811608, EPI_ISL_9811637, EPI_ISL_9811674, EPI_ISL_9811700, EPI_ISL_9811708, EPI_ISL_9811720, EPI_ISL_9811724, EPI_ISL_9811732, EPI_ISL_9811737, EPI_ISL_9811776, EPI_ISL_9811829, EPI_ISL_9811914, EPI_ISL_9811950, EPI_ISL_9811963, EPI_ISL_9812005, EPI_ISL_9812025<br>see above                                                                                                                                                                                                                                                                                                                                                                                                                                                                                                                                                                                                                                                                                                                                                                                                                                                                                                                                                                                                                                                                                                                                                                                                                                                                                                                                                                                                                                                                                                                                                                                                                                                                                                                                                                                                                                                                                                                                                                                                                                                                                                                                                                                                                                                                                                                                                                                                                                                                                                                                                                                                                                                                                                                                                                                                                                                                                                                                                                                                                                                                                                                                                                                                                                                                                                                                                                                                                                                                                                                                                                                                                                                                                                                                                                                                                                                                                                                                                                                                                                                                                                                                                                                                                                                                                                                                                                                                                                                                                                                                                                                                                                                                                                                                                                                                                                                                                                                                                                                                                                                                                                                                                                                                                                                                                                                                                                                                                                                                                                                                                                                                                                                                                                                                                                                                                                                                                                                                                                                                                                                                                                                                                                                                                                                                                                                                                                                                                                                                                                                                                                                                                                                                                                                                                                                                                                                                                                                                                                                                                                                                                                                                                                                                                                                                                                                                                                                                                                                                                                                                                                                                                                                                                                                                                                                                                                                                                                                                                                                                                                                                                                                                                                                                                                                                                                                                                                                                                                                                                                                                                                                                                                                                                                                                                                                                                                                                                                                                                                                                                                                                                                                                                                                                                                                                                                                                                                                                                                                                                                                                                                                                                                                                                                                                                                                                                                                                                                                                                                                                                                                                                                                                                                                                                                                                                                                                                                                                                                                                                                                                                                                                                                                                                                                                                                                                                                                                                                                                                                                                                                                                                                                                                                        | Arizona State University<br>Azienda Ospedaliera Terni<br>Azienda Sanitaria dell'Alto Adige - Laboratorio Aziendale di Microbiologia e Virologia<br>BIOCLINIC SAINT MAUR<br>BIOLBS Rouen<br>BJ Medical College, Ahmedabad<br>Bioscientia MVZ Labor Karlsruhe GmbH<br>Borneo Medical Centre (Kuching)<br>Broad Institute Clinical Research Sequencing Platform | Arizona State University<br>Istituto Zooprofilattico Sperimentale dell'Abruzzo e Molise "G. Caporale"<br>Azienda Sanitaria dell'Alto Adige<br>Department of Virology, Henri Mondor University Hospital, Assistance Publique Hôpitaux de Paris, Université Paris-Est Créteil, INSERM U955<br>Department of Virology, Henri Mondor University Hospital, Assistance Publique Hôpitaux de Paris, Université Paris-Est Créteil, INSERM U955<br>Gujarat Biotechnology Research Centre<br>Robert Koch Institute<br>Institute of Health and Community Medicine<br>Infectious Disease Program, Broad Institute of Harvard and MIT | Alexis W. Thomas; Efreem S. Lim; James C. Hu; Joshua LaBaer; LaRinda A. Holland; Matthew F. Smith; Nathaniel Johnson; Nghia C. Pham; Rabia Maqsood; Regan A. Sullins; Remington P. Fitch; Steven C. Holland; Tianchen Mu; Vel Murugan<br>Ancora M; Biagetti M; Calistri P; Cammà C; Curini V; Delli Compagni E; Di Domenico M; Di Pasquale A; Giammariori M; Lorusso A; Mangone I; Marcacci M; Palumbo M; Puglia I; Rinaldi A; Savini G; Scaccetti A; Scialabba S<br>Irene Bianconi<br>Alexandre Soulier; Christophe Rodriguez; Elisabeth Trawinski; Guillaume Gricourt; Jean-Michel Pawlowsky; Melissa N'Debi; Slim Fourati; Vanessa Demontant<br>Alexandre Soulier; Christophe Rodriguez; Elisabeth Trawinski; Guillaume Gricourt; Jean-Michel Pawlowsky; Melissa N'Debi; Slim Fourati; Vanessa Demontant<br>Akhilesh Modi; Apurvashin Puvar; Bhadrshreshin Gohil; Chaitanya Joshi; Disha Vora; Janvi Raval; Jaykumar Rangani; Madhvi Joshi; Nimesh Patel; Nitin Savaliya; NitinShukla; Priyank Chavda; Ramesh Pandit; Roshani Mishra; Sonal Sharma; Sumita Soni; Tasnim Trivedi; Zarna Patel<br>Chan Chia Jui; Chua Hock Hin; David Perera; Ooi Mong How; Tonnie Sia Loong Loong; Wong Jyn Shan |
| EPI_ISL_9692752<br>EPI_ISL_9797159<br>EPI_ISL_9798928<br>EPI_ISL_9692786, EPI_ISL_9692793, EPI_ISL_9692796, EPI_ISL_9692806, EPI_ISL_9692807<br>EPI_ISL_9602948, EPI_ISL_9602949, EPI_ISL_9603043<br>EPI_ISL_9750866<br>EPI_ISL_9704019<br>EPI_ISL_9704052<br>EPI_ISL_9602954<br>EPI_ISL_9602950, EPI_ISL_9602951, EPI_ISL_9692687, EPI_ISL_9692695, EPI_ISL_9692696, EPI_ISL_9703968, EPI_ISL_9750867, EPI_ISL_9750869, EPI_ISL_9750912<br>see above<br>EPI_ISL_9750865<br>EPI_ISL_9692769, EPI_ISL_9750794<br>EPI_ISL_9750924, EPI_ISL_9750925, EPI_ISL_9797294, EPI_ISL_9797295, EPI_ISL_9797296, EPI_ISL_9797421<br>EPI_ISL_9666031<br>EPI_ISL_9796982<br>EPI_ISL_9604883<br>EPI_ISL_9519832<br>EPI_ISL_9666033, EPI_ISL_9666037, EPI_ISL_9666046<br>EPI_ISL_9793512, EPI_ISL_9793526, EPI_ISL_9793527, EPI_ISL_9793529<br>EPI_ISL_9602484, EPI_ISL_9797009, EPI_ISL_9797158, EPI_ISL_9797247, EPI_ISL_9799044<br>EPI_ISL_9430445, EPI_ISL_9430446, EPI_ISL_9430452, EPI_ISL_9430463, EPI_ISL_9430471, EPI_ISL_9430473, EPI_ISL_9430476, EPI_ISL_9430480, EPI_ISL_9430490, EPI_ISL_9430498, EPI_ISL_9430507, EPI_ISL_9430509, EPI_ISL_9430510, EPI_ISL_9430516, EPI_ISL_9430527, EPI_ISL_9651098, EPI_ISL_9651099, EPI_ISL_9651101, EPI_ISL_9651111, EPI_ISL_9651113, EPI_ISL_9651114, EPI_ISL_9651164, EPI_ISL_9651168, EPI_ISL_9651170, EPI_ISL_9651177, EPI_ISL_9651180, EPI_ISL_9651182, EPI_ISL_9651185, EPI_ISL_9651190, EPI_ISL_9651192, EPI_ISL_9651193, EPI_ISL_9651194, EPI_ISL_9651197, EPI_ISL_9651199, EPI_ISL_9651200, EPI_ISL_9651201, EPI_ISL_9651202, EPI_ISL_9651203, EPI_ISL_9651204, EPI_ISL_9651205, EPI_ISL_9651206, EPI_ISL_9651207, EPI_ISL_9651208, EPI_ISL_9651209, EPI_ISL_9651210, EPI_ISL_9651211, EPI_ISL_9651212, EPI_ISL_9651213, EPI_ISL_9651214, EPI_ISL_9651215, EPI_ISL_9651216, EPI_ISL_9651217, EPI_ISL_9651218, EPI_ISL_9651219, EPI_ISL_9651220, EPI_ISL_9651221, EPI_ISL_9651222, EPI_ISL_9651223, EPI_ISL_9651224, EPI_ISL_9651225, EPI_ISL_9651226, EPI_ISL_9651227, EPI_ISL_9651228, EPI_ISL_9651229, EPI_ISL_9651230, EPI_ISL_9651231, EPI_ISL_9651232, EPI_ISL_9651233, EPI_ISL_9651234, EPI_ISL_9651235, EPI_ISL_9651236, EPI_ISL_9651237, EPI_ISL_9651238, EPI_ISL_9651239, EPI_ISL_9651240, EPI_ISL_9651241, EPI_ISL_9651242, EPI_ISL_9651243, EPI_ISL_9651244, EPI_ISL_9651245, EPI_ISL_9651246, EPI_ISL_9651247, EPI_ISL_9651248, EPI_ISL_9651249, EPI_ISL_9651250, EPI_ISL_9651251, EPI_ISL_9651252, EPI_ISL_9651253, EPI_ISL_9651254, EPI_ISL_9651255, EPI_ISL_9651256, EPI_ISL_9651257, EPI_ISL_9651258, EPI_ISL_9651259, EPI_ISL_9651260, EPI_ISL_9651261, EPI_ISL_9651262, EPI_ISL_9651263, EPI_ISL_9651264, EPI_ISL_9651265, EPI_ISL_9651266, EPI_ISL_9651267, EPI_ISL_9651268, EPI_ISL_9651269, EPI_ISL_9651270, EPI_ISL_9651271, EPI_ISL_9651272, EPI_ISL_9651273, EPI_ISL_9651274, EPI_ISL_9651275, EPI_ISL_9651276, EPI_ISL_9651277, EPI_ISL_9651278, EPI_ISL_9651279, EPI_ISL_9651280, EPI_ISL_9651281, EPI_ISL_9651282, EPI_ISL_9651283, EPI_ISL_9651284, EPI_ISL_9651285, EPI_ISL_9651286, EPI_ISL_9651287, EPI_ISL_9651288, EPI_ISL_9651289, EPI_ISL_9651290, EPI_ISL_9651291, EPI_ISL_9651292, EPI_ISL_9651293, EPI_ISL_9651294, EPI_ISL_9651295, EPI_ISL_9651296, EPI_ISL_9651297, EPI_ISL_9651298, EPI_ISL_9651299, EPI_ISL_9651300, EPI_ISL_9651301, EPI_ISL_9651302, EPI_ISL_9651303, EPI_ISL_9651304, EPI_ISL_9651305, EPI_ISL_9651306, EPI_ISL_9651307, EPI_ISL_9651308, EPI_ISL_9651309, EPI_ISL_9651310, EPI_ISL_9651311, EPI_ISL_9651312, EPI_ISL_9651313, EPI_ISL_9651314, EPI_ISL_9651315, EPI_ISL_9651316, EPI_ISL_9651317, EPI_ISL_9651318, EPI_ISL_9651319, EPI_ISL_9651320, EPI_ISL_9651321, EPI_ISL_9651322, EPI_ISL_9651323, EPI_ISL_9651324, EPI_ISL_9651325, EPI_ISL_9651326, EPI_ISL_9651327, EPI_ISL_9651328, EPI_ISL_9651329, EPI_ISL_9651330, EPI_ISL_9651331, EPI_ISL_9651332, EPI_ISL_9651333, EPI_ISL_9651334, EPI_ISL_9651335, EPI_ISL_9651336, EPI_ISL_9651337, EPI_ISL_9651338, EPI_ISL_9651339, EPI_ISL_9651340, EPI_ISL_9651341, EPI_ISL_9651342, EPI_ISL_9651343, EPI_ISL_9651344, EPI_ISL_9651345, EPI_ISL_9651346, EPI_ISL_9651347, EPI_ISL_9651348, EPI_ISL_9651349, EPI_ISL_9651350, EPI_ISL_9651351, EPI_ISL_9651352, EPI_ISL_9651353, EPI_ISL_9651354, EPI_ISL_9651355, EPI_ISL_9651356, EPI_ISL_9651357, EPI_ISL_9651358, EPI_ISL_9651359, EPI_ISL_9651360, EPI_ISL_9651361, EPI_ISL_9651362, EPI_ISL_9651363, EPI_ISL_9651364, EPI_ISL_9651365, EPI_ISL_9651366, EPI_ISL_9651367, EPI_ISL_9651368, EPI_ISL_9651369, EPI_ISL_9651370, EPI_ISL_9651371, EPI_ISL_9651372, EPI_ISL_9651373, EPI_ISL_9651374, EPI_ISL_9651375, EPI_ISL_9651376, EPI_ISL_9651377, EPI_ISL_9651378, EPI_ISL_9651379, EPI_ISL_9651380, EPI_ISL_9651381, EPI_ISL_9651382, EPI_ISL_9651383, EPI_ISL_9651384, EPI_ISL_9651385, EPI_ISL_9651386, EPI_ISL_9651387, EPI_ISL_9651388, EPI_ISL_9651389, EPI_ISL_9651390, EPI_ISL_9651391, EPI_ISL_9651392, EPI_ISL_9651393, EPI_ISL_9651394, EPI_ISL_9651395, EPI_ISL_9651396, EPI_ISL_9651397, EPI_ISL_9651398, EPI_ISL_9651399, EPI_ISL_9651400, EPI_ISL_9651401, EPI_ISL_9651402, EPI_ISL_9651403, EPI_ISL_9651404, EPI_ISL_9651405, EPI_ISL_9651406, EPI_ISL_9651407, EPI_ISL_9651408, EPI_ISL_9651409, EPI_ISL_9651410, EPI_ISL_9651411, EPI_ISL_9651412, EPI_ISL_9651413, EPI_ISL_9651414, EPI_ISL_9651415, EPI_ISL_9651416, EPI_ISL_9651417, EPI_ISL_9651418, EPI_ISL_9651419, EPI_ISL_9651420, EPI_ISL_9651421, EPI_ISL_9651422, EPI_ISL_9651423, EPI_ISL_9651424, EPI_ISL_9651425, EPI_ISL_9651426, EPI_ISL_9651427, EPI_ISL_9651428, EPI_ISL_9651429, EPI_ISL_9651430, EPI_ISL_9651431, EPI_ISL_9651432, EPI_ISL_9651433, EPI_ISL_9651434, EPI_ISL_9651435, EPI_ISL_9651436, EPI_ISL_9651437, EPI_ISL_9651438, EPI_ISL_9651439, EPI_ISL_9651440, EPI_ISL_9651441, EPI_ISL_9651442, EPI_ISL_9651443, EPI_ISL_9651444, EPI_ISL_9651445, EPI_ISL_9651446, EPI_ISL_9651447, EPI_ISL_9651448, EPI_ISL_9651449, EPI_ISL_9651450, EPI_ISL_9651451, EPI_ISL_9651452, EPI_ISL_9651453, EPI_ISL_9651454, EPI_ISL_9651455, EPI_ISL_9651456, EPI_ISL_9651457, EPI_ISL_9651458, EPI_ISL_9651459, EPI_ISL_9651460, EPI_ISL_9651461, EPI_ISL_9651462, EPI_ISL_9651463, EPI_ISL_9651464, EPI_ISL_9651465, EPI_ISL_9651466, EPI_ISL_9651467, EPI_ISL_9651468, EPI_ISL_9651469, EPI_ISL_9651470, EPI_ISL_9651471, EPI_ISL_9651472, EPI_ISL_9651473, EPI_ISL_9651474, EPI_ISL_9651475, EPI_ISL_9651476, EPI_ISL_9651477, EPI_ISL_9651478, EPI_ISL_9651479, EPI_ISL_9651480, EPI_ISL_9651481, EPI_ISL_9651482, EPI_ISL_9651483, EPI_ISL_9651484, EPI_ISL_9651485, EPI_ISL_9651486, EPI_ISL_9651487, EPI_ISL_9651488, EPI_ISL_9651489, EPI_ISL_9651490, EPI_ISL_9651491, EPI_ISL_9651492, EPI_ISL_9651493, EPI_ISL_9651494, EPI_ISL_9651495, EPI_ISL_9651496, EPI_ISL_9651497, EPI_ISL_9651498, EPI_ISL_9651499, EPI_ISL_9651500, EPI_ISL_9651501, EPI_ISL_9651502, EPI_ISL_9651503, EPI_ISL_9651504, EPI_ISL_9651505, EPI_ISL_9651506, EPI_ISL_9651507, EPI_ISL_9651508, EPI_ISL_9651509, EPI_ISL_9651510, EPI_ISL_9651511, EPI_ISL_9651512, EPI_ISL_9651513, EPI_ISL_9651514, EPI_ISL_9651515, EPI_ISL_9651516, EPI_ISL_9651517, EPI_ISL_9651518, EPI_ISL_9651519, EPI_ISL_9651520, EPI_ISL_9651521, EPI_ISL_9651522, EPI_ISL_9651523, EPI_ISL_9651524, EPI_ISL_9651525, EPI_ISL_9651526, EPI_ISL_9651527, EPI_ISL_9651528, EPI_ISL_9651529, EPI_ISL_9651530, EPI_ISL_9651531, EPI_ISL_9651532, EPI_ISL_9651533, EPI_ISL_9651534, EPI_ISL_9651535, EPI_ISL_9651536, EPI_ISL_9651537, EPI_ISL_9651538, EPI_ISL_9651539, EPI_ISL_9651540, EPI_ISL_9651541, EPI_ISL_9651542, EPI_ISL_9651543, EPI_ISL_9651544, EPI_ISL_9651545, EPI_ISL_9651546, EPI_ISL_9651547, EPI_ISL_9651548, EPI_ISL_9651549, EPI_ISL_9651550, EPI_ISL_9651551, EPI_ISL_9651552, EPI_ISL_9651553, EPI_ISL_9651554, EPI_ISL_9651555, EPI_ISL_9651556, EPI_ISL_9651557, EPI_ISL_9651558, EPI_ISL_9651559, EPI_ISL_9651560, EPI_ISL_9651561, EPI_ISL_9651562, EPI_ISL_9651563, EPI_ISL_9651564, EPI_ISL_9651565, EPI_ISL_9651566, EPI_ISL_9651567, EPI_ISL_9651568, EPI_ISL_9651569, EPI_ISL_9651570, EPI_ISL_9651571, EPI_ISL_9651572, EPI_ISL_9651573, EPI_ISL_9651574, EPI_ISL_9651575, EPI_ISL_9651576, EPI_ISL_9651577, EPI_ISL_9651578, EPI_ISL_9651579, EPI_ISL_9651580, EPI_ISL_9651581, EPI_ISL_9651582, EPI_ISL_9651583, EPI_ISL_9651584, EPI_ISL_9651585, EPI_ISL_9651586, EPI_ISL_9651587, EPI_ISL_9651588, EPI_ISL_9651589, EPI_ISL_9651590, EPI_ISL_9651591, EPI_ISL_9651592, EPI_ISL_9651593, EPI_ISL_9651594, EPI_ISL_9651595, EPI_ISL_9651596, EPI_ISL_9651597, EPI_ISL_9651598, EPI_ISL_9651599, EPI_ISL_9651600, EPI_ISL_9651601, EPI_ISL_9651602, EPI_ISL_9651603, EPI_ISL_9651604, EPI_ISL_9651605, EPI_ISL_9651606, EPI_ISL_9651607, EPI_ISL_9651608, EPI_ISL_9651609, EPI_ISL_9651610, EPI_ISL_9651611, EPI_ISL_9651612, EPI_ISL_9651613, EPI_ISL_9651614, EPI_ISL_9651615, EPI_ISL_9651616, EPI_ISL_9651617, EPI_ISL_9651618, EPI_ISL_9651619, EPI_ISL_9651620, EPI_ISL_9651621, EPI_ISL_9651622, EPI_ISL_9651623, EPI_ISL_9651624, EPI_ISL_9651625, EPI_ISL_9651626, EPI_ISL_9651627, EPI_ISL_9651628, EPI_ISL_9651629, EPI_ISL_9651630, EPI_ISL_9651631, EPI_ISL_9651632, EPI_ISL_9651633, EPI_ISL_9651634, EPI_ISL_9651635, EPI_ISL_9651636, EPI_ISL_9651637, EPI_ISL_9651638, EPI_ISL_9651639, EPI_ISL_9651640, EPI_ISL_9651641, EPI_ISL_9651642, EPI_ISL_9651643, EPI_ISL_9651644, EPI_ISL_9651645, EPI_ISL_9651646, EPI_ISL_9651647, EPI_ISL_9651648, EPI_ISL_9651649, EPI_ISL_9651650, EPI_ISL_9651651, EPI_ISL_9651652, EPI_ISL_9651653, EPI_ISL_9651654, EPI_ISL_9651655, EPI_ISL_9651656, EPI_ISL_9651657, EPI_ISL_9651658, EPI_ISL_9651659, EPI_ISL_9651660, EPI_ISL_9651661, EPI_ISL_9651662, EPI_ISL_9651663, EPI_ISL_9651664, EPI_ISL_9651665, EPI_ISL_9651666, EPI_ISL_9651667, EPI_ISL_9651668, EPI_ISL_9651669, EPI_ISL_9651670, EPI_ISL_9651671, EPI_ISL_9651672, EPI_ISL_9651673, EPI_ISL_9651674, EPI_ISL_9651675, EPI_ISL_9651676, EPI_ISL_9651677, EPI_ISL_9651678, EPI_ISL_9651679, EPI_ISL_9651680, EPI_ISL_9651681, EPI_ISL_9651682, EPI_ISL_9651683, EPI_ISL_9651684, EPI_ISL_9651685, EPI_ISL_9651686, EPI_ISL_9651687, EPI_ISL_9651688, EPI_ISL_9651689, EPI_ISL_9651690, EPI_ISL_9651691, EPI_ISL_9651692, EPI_ISL_9651693, EPI_ISL_9651694, EPI_ISL_9651695, EPI_ISL_9651696, EPI_ISL_9651697, EPI_ISL_9651698, EPI_ISL_9651699, EPI_ISL_9651700, EPI_ISL_9651701, EPI_ISL_9651702, EPI_ISL_9651703, EPI_ISL_9651704, EPI_ISL_9651705, EPI_ISL_9651706, EPI_ISL_9651707, EPI_ISL_9651708, EPI_ISL_9651709, EPI_ISL_9651710, EPI_ISL_9651711, EPI_ISL_9651712, EPI_ISL_9651713, EPI_ISL_9651714, EPI_ISL_9651715, EPI_ISL_9651716, EPI_ISL_9651717, EPI_ISL_9651718, EPI_ISL_9651719, EPI_ISL_9651720, EPI_ISL_9651721, EPI_ISL_9651722, EPI_ISL_9651723, EPI_ISL_9651724, EPI_ISL_9651725, EPI_ISL_9651726, EPI_ISL_9651727, EPI_ISL_9651728, EPI_ISL_9651729, EPI_ISL_9651730, EPI_ISL_9651731, EPI_ISL_9651732, EPI_ISL_9651733, EPI_ISL_9651734, EPI_ISL_9651735, EPI_ISL_9651736, EPI_ISL_9651737, EPI_ISL_9651738, EPI_ISL_9651739, EPI_ISL_9651740, EPI_ISL_9651741, EPI_ISL_9651742, EPI_ISL_9651743, EPI_ISL_9651744, EPI_ISL_9651745, EPI_ISL_9651746, EPI_ISL_9651747, EPI_ISL_9651748, EPI_ISL_9651749, EPI_ISL_9651750, EPI_ISL_9651751, EPI_ISL_9651752, EPI_ISL_9651753, EPI_ISL_9651754, EPI_ISL_9651755, EPI_ISL_9651756, EPI_ISL_9651757, EPI_ISL_9651758, EPI_ISL_9651759, EPI_ISL_9651760, EPI_ISL_9651761, EPI_ISL_9651762, EPI_ISL_9651763, EPI_ISL_9651764, EPI_ISL_9651765, EPI_ISL_9651766, EPI_ISL_9651767, EPI_ISL_9651768, EPI_ISL_9651769, EPI_ISL_9651770, EPI_ISL_9651771, EPI_ISL_9651772, EPI_ISL_9651773, EPI_ISL_9651774, EPI_ISL_9651775, EPI_ISL_9651776, EPI_ISL_9651777, EPI_ISL_9651778, EPI_ISL_9651779, EPI_ISL_9651780, EPI_ISL_9651781, EPI_ISL_9651782, EPI_ISL_9651783, EPI_ISL_9651784, EPI_ISL_9651785, EPI_ISL_9651786, EPI_ISL_9651787, EPI_ISL_9651788, EPI_ISL_9651789, EPI_ISL_9651790, EPI_ISL_9651791, EPI_ISL_9651792, EPI_ISL_9651793, EPI_ISL_9651794, EPI_ISL_9651795, EPI_IS |                                                                                                                                                                                                                                                                                                                                                              |                                                                                                                                                                                                                                                                                                                                                                                                                                                                                                                                                                                                                          |                                                                                                                                                                                                                                                                                                                                                                                                                                                                                                                                                                                                                                                                                                                                                                                                                                                                                                                                                                                                                                                                                                                                                                                                    |

|                                                                                                                                                                                                                                                                                                                                                                                                                                                                                                                                                                                                                                                                                                                                                                                                                                                                                                                                                                                                                                                                                                                                                                                                                                                                                                                                                                                                                                                                                                                                                                                                                                                                                                                                                                                                                                                                                                                                                                                                                                                                                                                                                                                                                                                                                                                                                                                                                                                                                                                                                                                                                                                                                                                                                                                                                                                                                                                                                                                                                                                                                                                                                                                                                                                                                                                                                                                                                                                                                                                                                                                                                                                                                                                                                                                                                                                                                                                                                                                                                                                                                                                                                                                                                                                                                                                                                                                                                                                                                                                                                                                                                                                                                                                                                                                                                                                                                                                                                                                                                                                                                                                                                                                                                                                                                                                                                                                                                                                                                                                                                                                                                                                                                                                                                                                                                                                                                                                                                                                                                                                                                                                                                                                                                                                                                                                                                                                                                                                                                                                                                                                                                                                                                                                                                                                                                                                                                                                                                                                                                                                                                                                                                                                                                                                                                                                                                                                                                                                                                                                                                                                                                                                                                                                                                                                                                                                                                                                                                                                                                                                                                                                                                                                                                                                                                                                                                                                                                                                                                                                                                                                                                                                                                                                                                                                                                                                                                                                                                                                                                                                                                                                                                                                                                                                                                                                                                                                                                                                                                                                                                                                                                                                                                                                                                                                                                                                                                                                                                                                                                                                                                                                                                                                                                                                                                                                                                                                                                                                                                                                                                                                                                                                                                                                                                                                                                                                                                                                                                                                                                                                                                                                                                                                                                                                                                                                                                                                                                                                                                                                                                                                                                                                                                                                                                                                                                                                                                                                                                                                                                                                                                                                                                                                                                                                                                                                                                                                                                                                                                                                                                                                                                                                                                                                                                                                                                                                                                                                                                                                                                                                                                                                                                                                                                                                                                                                                                                                                                                                                                                                                                                                                                                                                                                                                                                                     |                                                                                                                                                                                         |                                                                                                                                                                                         |                                                                                                                                                                                                                                                                                                                                                                                                                                                                                                                                                                                 |
|-------------------------------------------------------------------------------------------------------------------------------------------------------------------------------------------------------------------------------------------------------------------------------------------------------------------------------------------------------------------------------------------------------------------------------------------------------------------------------------------------------------------------------------------------------------------------------------------------------------------------------------------------------------------------------------------------------------------------------------------------------------------------------------------------------------------------------------------------------------------------------------------------------------------------------------------------------------------------------------------------------------------------------------------------------------------------------------------------------------------------------------------------------------------------------------------------------------------------------------------------------------------------------------------------------------------------------------------------------------------------------------------------------------------------------------------------------------------------------------------------------------------------------------------------------------------------------------------------------------------------------------------------------------------------------------------------------------------------------------------------------------------------------------------------------------------------------------------------------------------------------------------------------------------------------------------------------------------------------------------------------------------------------------------------------------------------------------------------------------------------------------------------------------------------------------------------------------------------------------------------------------------------------------------------------------------------------------------------------------------------------------------------------------------------------------------------------------------------------------------------------------------------------------------------------------------------------------------------------------------------------------------------------------------------------------------------------------------------------------------------------------------------------------------------------------------------------------------------------------------------------------------------------------------------------------------------------------------------------------------------------------------------------------------------------------------------------------------------------------------------------------------------------------------------------------------------------------------------------------------------------------------------------------------------------------------------------------------------------------------------------------------------------------------------------------------------------------------------------------------------------------------------------------------------------------------------------------------------------------------------------------------------------------------------------------------------------------------------------------------------------------------------------------------------------------------------------------------------------------------------------------------------------------------------------------------------------------------------------------------------------------------------------------------------------------------------------------------------------------------------------------------------------------------------------------------------------------------------------------------------------------------------------------------------------------------------------------------------------------------------------------------------------------------------------------------------------------------------------------------------------------------------------------------------------------------------------------------------------------------------------------------------------------------------------------------------------------------------------------------------------------------------------------------------------------------------------------------------------------------------------------------------------------------------------------------------------------------------------------------------------------------------------------------------------------------------------------------------------------------------------------------------------------------------------------------------------------------------------------------------------------------------------------------------------------------------------------------------------------------------------------------------------------------------------------------------------------------------------------------------------------------------------------------------------------------------------------------------------------------------------------------------------------------------------------------------------------------------------------------------------------------------------------------------------------------------------------------------------------------------------------------------------------------------------------------------------------------------------------------------------------------------------------------------------------------------------------------------------------------------------------------------------------------------------------------------------------------------------------------------------------------------------------------------------------------------------------------------------------------------------------------------------------------------------------------------------------------------------------------------------------------------------------------------------------------------------------------------------------------------------------------------------------------------------------------------------------------------------------------------------------------------------------------------------------------------------------------------------------------------------------------------------------------------------------------------------------------------------------------------------------------------------------------------------------------------------------------------------------------------------------------------------------------------------------------------------------------------------------------------------------------------------------------------------------------------------------------------------------------------------------------------------------------------------------------------------------------------------------------------------------------------------------------------------------------------------------------------------------------------------------------------------------------------------------------------------------------------------------------------------------------------------------------------------------------------------------------------------------------------------------------------------------------------------------------------------------------------------------------------------------------------------------------------------------------------------------------------------------------------------------------------------------------------------------------------------------------------------------------------------------------------------------------------------------------------------------------------------------------------------------------------------------------------------------------------------------------------------------------------------------------------------------------------------------------------------------------------------------------------------------------------------------------------------------------------------------------------------------------------------------------------------------------------------------------------------------------------------------------------------------------------------------------------------------------------------------------------------------------------------------------------------------------------------------------------------------------------------------------------------------------------------------------------------------------------------------------------------------------------------------------------------------------------------------------------------------------------------------------------------------------------------------------------------------------------------------------------------------------------------------------------------------------------------------------------------------------------------------------------------------------------------------------------------------------------------------------------------------------------------------------------------------------------------------------------------------------------------------------------------------------------------------------------------------------------------------------------------------------------------------------------------------------------------------------------------------------------------------------------------------------------------------------------------------------------------------------------------------------------------------------------------------------------------------------------------------------------------------------------------------------------------------------------------------------------------------------------------------------------------------------------------------------------------------------------------------------------------------------------------------------------------------------------------------------------------------------------------------------------------------------------------------------------------------------------------------------------------------------------------------------------------------------------------------------------------------------------------------------------------------------------------------------------------------------------------------------------------------------------------------------------------------------------------------------------------------------------------------------------------------------------------------------------------------------------------------------------------------------------------------------------------------------------------------------------------------------------------------------------------------------------------------------------------------------------------------------------------------------------------------------------------------------------------------------------------------------------------------------------------------------------------------------------------------------------------------------------------------------------------------------------------------------------------------------------------------------------------------------------------------------------------------------------------------------------------------------------------------------------------------------------------------------------------------------------------------------------------------------------------------------------------------------------------------------------------------------------------------------------------------------------------------------------------------------------------------------------------------------------------------------------------------------------------------------------------------------------------------------------------------------------------------------------------------------------------------------------------------------------------------------------------------------------------------------------------------------------------------------------------------------------------------------------------------------------------------------------------------------------------------------------------------------------------------------------------------------------------------------------------------------------------------------------------------------------------------------------------------------------------------------------------------------------------------------------------------------------------------------------------------------------------------------------------------------------------------------------------------------------------------------------------------------------------------------------------------------------------------------------------------------------------------------------------------------------------------------------------------------------------------------------------------|-----------------------------------------------------------------------------------------------------------------------------------------------------------------------------------------|-----------------------------------------------------------------------------------------------------------------------------------------------------------------------------------------|---------------------------------------------------------------------------------------------------------------------------------------------------------------------------------------------------------------------------------------------------------------------------------------------------------------------------------------------------------------------------------------------------------------------------------------------------------------------------------------------------------------------------------------------------------------------------------|
| EPI_IS1_9644536                                                                                                                                                                                                                                                                                                                                                                                                                                                                                                                                                                                                                                                                                                                                                                                                                                                                                                                                                                                                                                                                                                                                                                                                                                                                                                                                                                                                                                                                                                                                                                                                                                                                                                                                                                                                                                                                                                                                                                                                                                                                                                                                                                                                                                                                                                                                                                                                                                                                                                                                                                                                                                                                                                                                                                                                                                                                                                                                                                                                                                                                                                                                                                                                                                                                                                                                                                                                                                                                                                                                                                                                                                                                                                                                                                                                                                                                                                                                                                                                                                                                                                                                                                                                                                                                                                                                                                                                                                                                                                                                                                                                                                                                                                                                                                                                                                                                                                                                                                                                                                                                                                                                                                                                                                                                                                                                                                                                                                                                                                                                                                                                                                                                                                                                                                                                                                                                                                                                                                                                                                                                                                                                                                                                                                                                                                                                                                                                                                                                                                                                                                                                                                                                                                                                                                                                                                                                                                                                                                                                                                                                                                                                                                                                                                                                                                                                                                                                                                                                                                                                                                                                                                                                                                                                                                                                                                                                                                                                                                                                                                                                                                                                                                                                                                                                                                                                                                                                                                                                                                                                                                                                                                                                                                                                                                                                                                                                                                                                                                                                                                                                                                                                                                                                                                                                                                                                                                                                                                                                                                                                                                                                                                                                                                                                                                                                                                                                                                                                                                                                                                                                                                                                                                                                                                                                                                                                                                                                                                                                                                                                                                                                                                                                                                                                                                                                                                                                                                                                                                                                                                                                                                                                                                                                                                                                                                                                                                                                                                                                                                                                                                                                                                                                                                                                                                                                                                                                                                                                                                                                                                                                                                                                                                                                                                                                                                                                                                                                                                                                                                                                                                                                                                                                                                                                                                                                                                                                                                                                                                                                                                                                                                                                                                                                                                                                                                                                                                                                                                                                                                                                                                                                                                                                                                                                                                     | Caritas Medical Centre                                                                                                                                                                  | Hong Kong Department of Health                                                                                                                                                          | Stroeven; Rachel Boyle; Sally Roberts; SallyAnn Harbison; Sarah Cockerton; Sarah Jefferies; Sharmini Muttaiyah; Susan Morphet; Susan Taylor; Timothy Blackmore; Vani Sathyanthran; Veronica Playle; Virginia Hope; Xiaoyun Ren                                                                                                                                                                                                                                                                                                                                                  |
| EPI_IS1_9755913, EPI_IS1_9755921, EPI_IS1_9755922, EPI_IS1_9755929, EPI_IS1_9755933, EPI_IS1_9755937, EPI_IS1_9755941, EPI_IS1_9755944, EPI_IS1_9771414, EPI_IS1_9771417, EPI_IS1_9771434, EPI_IS1_9771435, EPI_IS1_9771440                                                                                                                                                                                                                                                                                                                                                                                                                                                                                                                                                                                                                                                                                                                                                                                                                                                                                                                                                                                                                                                                                                                                                                                                                                                                                                                                                                                                                                                                                                                                                                                                                                                                                                                                                                                                                                                                                                                                                                                                                                                                                                                                                                                                                                                                                                                                                                                                                                                                                                                                                                                                                                                                                                                                                                                                                                                                                                                                                                                                                                                                                                                                                                                                                                                                                                                                                                                                                                                                                                                                                                                                                                                                                                                                                                                                                                                                                                                                                                                                                                                                                                                                                                                                                                                                                                                                                                                                                                                                                                                                                                                                                                                                                                                                                                                                                                                                                                                                                                                                                                                                                                                                                                                                                                                                                                                                                                                                                                                                                                                                                                                                                                                                                                                                                                                                                                                                                                                                                                                                                                                                                                                                                                                                                                                                                                                                                                                                                                                                                                                                                                                                                                                                                                                                                                                                                                                                                                                                                                                                                                                                                                                                                                                                                                                                                                                                                                                                                                                                                                                                                                                                                                                                                                                                                                                                                                                                                                                                                                                                                                                                                                                                                                                                                                                                                                                                                                                                                                                                                                                                                                                                                                                                                                                                                                                                                                                                                                                                                                                                                                                                                                                                                                                                                                                                                                                                                                                                                                                                                                                                                                                                                                                                                                                                                                                                                                                                                                                                                                                                                                                                                                                                                                                                                                                                                                                                                                                                                                                                                                                                                                                                                                                                                                                                                                                                                                                                                                                                                                                                                                                                                                                                                                                                                                                                                                                                                                                                                                                                                                                                                                                                                                                                                                                                                                                                                                                                                                                                                                                                                                                                                                                                                                                                                                                                                                                                                                                                                                                                                                                                                                                                                                                                                                                                                                                                                                                                                                                                                                                                                                                                                                                                                                                                                                                                                                                                                                                                                                                                                                                                                         | Center for Laboratory Medicine                                                                                                                                                          | Center for Laboratory Medicine, ZLMSSG                                                                                                                                                  | Alan K.L. Tsang; Edman T.K. Lam; Ken H.L. Ng; Patricia K. L. Leung; Peter C.W. Yip; Rickjason C.W. Chan                                                                                                                                                                                                                                                                                                                                                                                                                                                                         |
| see above                                                                                                                                                                                                                                                                                                                                                                                                                                                                                                                                                                                                                                                                                                                                                                                                                                                                                                                                                                                                                                                                                                                                                                                                                                                                                                                                                                                                                                                                                                                                                                                                                                                                                                                                                                                                                                                                                                                                                                                                                                                                                                                                                                                                                                                                                                                                                                                                                                                                                                                                                                                                                                                                                                                                                                                                                                                                                                                                                                                                                                                                                                                                                                                                                                                                                                                                                                                                                                                                                                                                                                                                                                                                                                                                                                                                                                                                                                                                                                                                                                                                                                                                                                                                                                                                                                                                                                                                                                                                                                                                                                                                                                                                                                                                                                                                                                                                                                                                                                                                                                                                                                                                                                                                                                                                                                                                                                                                                                                                                                                                                                                                                                                                                                                                                                                                                                                                                                                                                                                                                                                                                                                                                                                                                                                                                                                                                                                                                                                                                                                                                                                                                                                                                                                                                                                                                                                                                                                                                                                                                                                                                                                                                                                                                                                                                                                                                                                                                                                                                                                                                                                                                                                                                                                                                                                                                                                                                                                                                                                                                                                                                                                                                                                                                                                                                                                                                                                                                                                                                                                                                                                                                                                                                                                                                                                                                                                                                                                                                                                                                                                                                                                                                                                                                                                                                                                                                                                                                                                                                                                                                                                                                                                                                                                                                                                                                                                                                                                                                                                                                                                                                                                                                                                                                                                                                                                                                                                                                                                                                                                                                                                                                                                                                                                                                                                                                                                                                                                                                                                                                                                                                                                                                                                                                                                                                                                                                                                                                                                                                                                                                                                                                                                                                                                                                                                                                                                                                                                                                                                                                                                                                                                                                                                                                                                                                                                                                                                                                                                                                                                                                                                                                                                                                                                                                                                                                                                                                                                                                                                                                                                                                                                                                                                                                                                                                                                                                                                                                                                                                                                                                                                                                                                                                                                                                                           | Center for Laboratory Medicine                                                                                                                                                          |                                                                                                                                                                                         | Yannick Gerth                                                                                                                                                                                                                                                                                                                                                                                                                                                                                                                                                                   |
| EPI_IS1_9612222, EPI_IS1_9612224, EPI_IS1_9612225, EPI_IS1_9783630, EPI_IS1_9783633, EPI_IS1_9783634, EPI_IS1_9783636, EPI_IS1_9783637, EPI_IS1_9783640, EPI_IS1_9783641, EPI_IS1_9783644                                                                                                                                                                                                                                                                                                                                                                                                                                                                                                                                                                                                                                                                                                                                                                                                                                                                                                                                                                                                                                                                                                                                                                                                                                                                                                                                                                                                                                                                                                                                                                                                                                                                                                                                                                                                                                                                                                                                                                                                                                                                                                                                                                                                                                                                                                                                                                                                                                                                                                                                                                                                                                                                                                                                                                                                                                                                                                                                                                                                                                                                                                                                                                                                                                                                                                                                                                                                                                                                                                                                                                                                                                                                                                                                                                                                                                                                                                                                                                                                                                                                                                                                                                                                                                                                                                                                                                                                                                                                                                                                                                                                                                                                                                                                                                                                                                                                                                                                                                                                                                                                                                                                                                                                                                                                                                                                                                                                                                                                                                                                                                                                                                                                                                                                                                                                                                                                                                                                                                                                                                                                                                                                                                                                                                                                                                                                                                                                                                                                                                                                                                                                                                                                                                                                                                                                                                                                                                                                                                                                                                                                                                                                                                                                                                                                                                                                                                                                                                                                                                                                                                                                                                                                                                                                                                                                                                                                                                                                                                                                                                                                                                                                                                                                                                                                                                                                                                                                                                                                                                                                                                                                                                                                                                                                                                                                                                                                                                                                                                                                                                                                                                                                                                                                                                                                                                                                                                                                                                                                                                                                                                                                                                                                                                                                                                                                                                                                                                                                                                                                                                                                                                                                                                                                                                                                                                                                                                                                                                                                                                                                                                                                                                                                                                                                                                                                                                                                                                                                                                                                                                                                                                                                                                                                                                                                                                                                                                                                                                                                                                                                                                                                                                                                                                                                                                                                                                                                                                                                                                                                                                                                                                                                                                                                                                                                                                                                                                                                                                                                                                                                                                                                                                                                                                                                                                                                                                                                                                                                                                                                                                                                                                                                                                                                                                                                                                                                                                                                                                                                                                                                                                                           | Centre Hospitalier Universitaire Clermont-Ferrand                                                                                                                                       | CHU Clermont-Ferrand, service de virologie                                                                                                                                              | Bisieux Maxime; Combes Patricia; Henquell Cecile; Mirand Audrey                                                                                                                                                                                                                                                                                                                                                                                                                                                                                                                 |
| see above                                                                                                                                                                                                                                                                                                                                                                                                                                                                                                                                                                                                                                                                                                                                                                                                                                                                                                                                                                                                                                                                                                                                                                                                                                                                                                                                                                                                                                                                                                                                                                                                                                                                                                                                                                                                                                                                                                                                                                                                                                                                                                                                                                                                                                                                                                                                                                                                                                                                                                                                                                                                                                                                                                                                                                                                                                                                                                                                                                                                                                                                                                                                                                                                                                                                                                                                                                                                                                                                                                                                                                                                                                                                                                                                                                                                                                                                                                                                                                                                                                                                                                                                                                                                                                                                                                                                                                                                                                                                                                                                                                                                                                                                                                                                                                                                                                                                                                                                                                                                                                                                                                                                                                                                                                                                                                                                                                                                                                                                                                                                                                                                                                                                                                                                                                                                                                                                                                                                                                                                                                                                                                                                                                                                                                                                                                                                                                                                                                                                                                                                                                                                                                                                                                                                                                                                                                                                                                                                                                                                                                                                                                                                                                                                                                                                                                                                                                                                                                                                                                                                                                                                                                                                                                                                                                                                                                                                                                                                                                                                                                                                                                                                                                                                                                                                                                                                                                                                                                                                                                                                                                                                                                                                                                                                                                                                                                                                                                                                                                                                                                                                                                                                                                                                                                                                                                                                                                                                                                                                                                                                                                                                                                                                                                                                                                                                                                                                                                                                                                                                                                                                                                                                                                                                                                                                                                                                                                                                                                                                                                                                                                                                                                                                                                                                                                                                                                                                                                                                                                                                                                                                                                                                                                                                                                                                                                                                                                                                                                                                                                                                                                                                                                                                                                                                                                                                                                                                                                                                                                                                                                                                                                                                                                                                                                                                                                                                                                                                                                                                                                                                                                                                                                                                                                                                                                                                                                                                                                                                                                                                                                                                                                                                                                                                                                                                                                                                                                                                                                                                                                                                                                                                                                                                                                                                                                           | Clemenshofen - Alexianer Clemenshofen Münster                                                                                                                                           | Robert Koch Institute                                                                                                                                                                   |                                                                                                                                                                                                                                                                                                                                                                                                                                                                                                                                                                                 |
| EPI_IS1_9728700, EPI_IS1_9728796, EPI_IS1_9729336, EPI_IS1_9729451, EPI_IS1_9729716                                                                                                                                                                                                                                                                                                                                                                                                                                                                                                                                                                                                                                                                                                                                                                                                                                                                                                                                                                                                                                                                                                                                                                                                                                                                                                                                                                                                                                                                                                                                                                                                                                                                                                                                                                                                                                                                                                                                                                                                                                                                                                                                                                                                                                                                                                                                                                                                                                                                                                                                                                                                                                                                                                                                                                                                                                                                                                                                                                                                                                                                                                                                                                                                                                                                                                                                                                                                                                                                                                                                                                                                                                                                                                                                                                                                                                                                                                                                                                                                                                                                                                                                                                                                                                                                                                                                                                                                                                                                                                                                                                                                                                                                                                                                                                                                                                                                                                                                                                                                                                                                                                                                                                                                                                                                                                                                                                                                                                                                                                                                                                                                                                                                                                                                                                                                                                                                                                                                                                                                                                                                                                                                                                                                                                                                                                                                                                                                                                                                                                                                                                                                                                                                                                                                                                                                                                                                                                                                                                                                                                                                                                                                                                                                                                                                                                                                                                                                                                                                                                                                                                                                                                                                                                                                                                                                                                                                                                                                                                                                                                                                                                                                                                                                                                                                                                                                                                                                                                                                                                                                                                                                                                                                                                                                                                                                                                                                                                                                                                                                                                                                                                                                                                                                                                                                                                                                                                                                                                                                                                                                                                                                                                                                                                                                                                                                                                                                                                                                                                                                                                                                                                                                                                                                                                                                                                                                                                                                                                                                                                                                                                                                                                                                                                                                                                                                                                                                                                                                                                                                                                                                                                                                                                                                                                                                                                                                                                                                                                                                                                                                                                                                                                                                                                                                                                                                                                                                                                                                                                                                                                                                                                                                                                                                                                                                                                                                                                                                                                                                                                                                                                                                                                                                                                                                                                                                                                                                                                                                                                                                                                                                                                                                                                                                                                                                                                                                                                                                                                                                                                                                                                                                                                                                                                 | Clinical Microbiology Laboratory, Tel Aviv Sourasky Medical Center                                                                                                                      | Clinical Microbiology Laboratory, Tel Aviv Sourasky Medical Center                                                                                                                      |                                                                                                                                                                                                                                                                                                                                                                                                                                                                                                                                                                                 |
| EPI_IS1_9673652, EPI_IS1_9673832, EPI_IS1_9673854, EPI_IS1_9673877, EPI_IS1_9673878, EPI_IS1_9673938, EPI_IS1_9674001, EPI_IS1_9703739, EPI_IS1_9703802, EPI_IS1_9703817, EPI_IS1_9703830                                                                                                                                                                                                                                                                                                                                                                                                                                                                                                                                                                                                                                                                                                                                                                                                                                                                                                                                                                                                                                                                                                                                                                                                                                                                                                                                                                                                                                                                                                                                                                                                                                                                                                                                                                                                                                                                                                                                                                                                                                                                                                                                                                                                                                                                                                                                                                                                                                                                                                                                                                                                                                                                                                                                                                                                                                                                                                                                                                                                                                                                                                                                                                                                                                                                                                                                                                                                                                                                                                                                                                                                                                                                                                                                                                                                                                                                                                                                                                                                                                                                                                                                                                                                                                                                                                                                                                                                                                                                                                                                                                                                                                                                                                                                                                                                                                                                                                                                                                                                                                                                                                                                                                                                                                                                                                                                                                                                                                                                                                                                                                                                                                                                                                                                                                                                                                                                                                                                                                                                                                                                                                                                                                                                                                                                                                                                                                                                                                                                                                                                                                                                                                                                                                                                                                                                                                                                                                                                                                                                                                                                                                                                                                                                                                                                                                                                                                                                                                                                                                                                                                                                                                                                                                                                                                                                                                                                                                                                                                                                                                                                                                                                                                                                                                                                                                                                                                                                                                                                                                                                                                                                                                                                                                                                                                                                                                                                                                                                                                                                                                                                                                                                                                                                                                                                                                                                                                                                                                                                                                                                                                                                                                                                                                                                                                                                                                                                                                                                                                                                                                                                                                                                                                                                                                                                                                                                                                                                                                                                                                                                                                                                                                                                                                                                                                                                                                                                                                                                                                                                                                                                                                                                                                                                                                                                                                                                                                                                                                                                                                                                                                                                                                                                                                                                                                                                                                                                                                                                                                                                                                                                                                                                                                                                                                                                                                                                                                                                                                                                                                                                                                                                                                                                                                                                                                                                                                                                                                                                                                                                                                                                                                                                                                                                                                                                                                                                                                                                                                                                                                                                                                                           | Clinical Microbiology Laboratory, Tel Aviv Sourasky Medical Center                                                                                                                      | Clinical Microbiology Laboratory, Tel Aviv Sourasky Medical Center                                                                                                                      | Alan Ziv; Amos Adler; Gior Morad; Katya Levitsky; Lior Handler; Ora Halutz; Orly Eshel                                                                                                                                                                                                                                                                                                                                                                                                                                                                                          |
| see above                                                                                                                                                                                                                                                                                                                                                                                                                                                                                                                                                                                                                                                                                                                                                                                                                                                                                                                                                                                                                                                                                                                                                                                                                                                                                                                                                                                                                                                                                                                                                                                                                                                                                                                                                                                                                                                                                                                                                                                                                                                                                                                                                                                                                                                                                                                                                                                                                                                                                                                                                                                                                                                                                                                                                                                                                                                                                                                                                                                                                                                                                                                                                                                                                                                                                                                                                                                                                                                                                                                                                                                                                                                                                                                                                                                                                                                                                                                                                                                                                                                                                                                                                                                                                                                                                                                                                                                                                                                                                                                                                                                                                                                                                                                                                                                                                                                                                                                                                                                                                                                                                                                                                                                                                                                                                                                                                                                                                                                                                                                                                                                                                                                                                                                                                                                                                                                                                                                                                                                                                                                                                                                                                                                                                                                                                                                                                                                                                                                                                                                                                                                                                                                                                                                                                                                                                                                                                                                                                                                                                                                                                                                                                                                                                                                                                                                                                                                                                                                                                                                                                                                                                                                                                                                                                                                                                                                                                                                                                                                                                                                                                                                                                                                                                                                                                                                                                                                                                                                                                                                                                                                                                                                                                                                                                                                                                                                                                                                                                                                                                                                                                                                                                                                                                                                                                                                                                                                                                                                                                                                                                                                                                                                                                                                                                                                                                                                                                                                                                                                                                                                                                                                                                                                                                                                                                                                                                                                                                                                                                                                                                                                                                                                                                                                                                                                                                                                                                                                                                                                                                                                                                                                                                                                                                                                                                                                                                                                                                                                                                                                                                                                                                                                                                                                                                                                                                                                                                                                                                                                                                                                                                                                                                                                                                                                                                                                                                                                                                                                                                                                                                                                                                                                                                                                                                                                                                                                                                                                                                                                                                                                                                                                                                                                                                                                                                                                                                                                                                                                                                                                                                                                                                                                                                                                                                                           | Clinical Microbiology Laboratory, Tel Aviv Sourasky Medical Center                                                                                                                      | Clinical Microbiology Laboratory, Tel Aviv Sourasky Medical Center                                                                                                                      |                                                                                                                                                                                                                                                                                                                                                                                                                                                                                                                                                                                 |
| EPI_IS1_9755820, EPI_IS1_9755833, EPI_IS1_9755866, EPI_IS1_9755867, EPI_IS1_9755871, EPI_IS1_9755872, EPI_IS1_9755887, EPI_IS1_9755888, EPI_IS1_9755889, EPI_IS1_9755894, EPI_IS1_9801985, EPI_IS1_9801991, EPI_IS1_9802003                                                                                                                                                                                                                                                                                                                                                                                                                                                                                                                                                                                                                                                                                                                                                                                                                                                                                                                                                                                                                                                                                                                                                                                                                                                                                                                                                                                                                                                                                                                                                                                                                                                                                                                                                                                                                                                                                                                                                                                                                                                                                                                                                                                                                                                                                                                                                                                                                                                                                                                                                                                                                                                                                                                                                                                                                                                                                                                                                                                                                                                                                                                                                                                                                                                                                                                                                                                                                                                                                                                                                                                                                                                                                                                                                                                                                                                                                                                                                                                                                                                                                                                                                                                                                                                                                                                                                                                                                                                                                                                                                                                                                                                                                                                                                                                                                                                                                                                                                                                                                                                                                                                                                                                                                                                                                                                                                                                                                                                                                                                                                                                                                                                                                                                                                                                                                                                                                                                                                                                                                                                                                                                                                                                                                                                                                                                                                                                                                                                                                                                                                                                                                                                                                                                                                                                                                                                                                                                                                                                                                                                                                                                                                                                                                                                                                                                                                                                                                                                                                                                                                                                                                                                                                                                                                                                                                                                                                                                                                                                                                                                                                                                                                                                                                                                                                                                                                                                                                                                                                                                                                                                                                                                                                                                                                                                                                                                                                                                                                                                                                                                                                                                                                                                                                                                                                                                                                                                                                                                                                                                                                                                                                                                                                                                                                                                                                                                                                                                                                                                                                                                                                                                                                                                                                                                                                                                                                                                                                                                                                                                                                                                                                                                                                                                                                                                                                                                                                                                                                                                                                                                                                                                                                                                                                                                                                                                                                                                                                                                                                                                                                                                                                                                                                                                                                                                                                                                                                                                                                                                                                                                                                                                                                                                                                                                                                                                                                                                                                                                                                                                                                                                                                                                                                                                                                                                                                                                                                                                                                                                                                                                                                                                                                                                                                                                                                                                                                                                                                                                                                                                                                         | Clinical Virology                                                                                                                                                                       | Clinical Bacteriology, University Hospital Basel                                                                                                                                        | Adrian Egli; Alfredo Mari; Fanny Wegner; Hans Hirsch; Helena MB SETH-Smith; Julia Bielicki; Karoline Leuzinger; Manuel Battegay; Tim Roloff                                                                                                                                                                                                                                                                                                                                                                                                                                     |
| EPI_IS1_9793691, EPI_IS1_9793722, EPI_IS1_9793723, EPI_IS1_9793801                                                                                                                                                                                                                                                                                                                                                                                                                                                                                                                                                                                                                                                                                                                                                                                                                                                                                                                                                                                                                                                                                                                                                                                                                                                                                                                                                                                                                                                                                                                                                                                                                                                                                                                                                                                                                                                                                                                                                                                                                                                                                                                                                                                                                                                                                                                                                                                                                                                                                                                                                                                                                                                                                                                                                                                                                                                                                                                                                                                                                                                                                                                                                                                                                                                                                                                                                                                                                                                                                                                                                                                                                                                                                                                                                                                                                                                                                                                                                                                                                                                                                                                                                                                                                                                                                                                                                                                                                                                                                                                                                                                                                                                                                                                                                                                                                                                                                                                                                                                                                                                                                                                                                                                                                                                                                                                                                                                                                                                                                                                                                                                                                                                                                                                                                                                                                                                                                                                                                                                                                                                                                                                                                                                                                                                                                                                                                                                                                                                                                                                                                                                                                                                                                                                                                                                                                                                                                                                                                                                                                                                                                                                                                                                                                                                                                                                                                                                                                                                                                                                                                                                                                                                                                                                                                                                                                                                                                                                                                                                                                                                                                                                                                                                                                                                                                                                                                                                                                                                                                                                                                                                                                                                                                                                                                                                                                                                                                                                                                                                                                                                                                                                                                                                                                                                                                                                                                                                                                                                                                                                                                                                                                                                                                                                                                                                                                                                                                                                                                                                                                                                                                                                                                                                                                                                                                                                                                                                                                                                                                                                                                                                                                                                                                                                                                                                                                                                                                                                                                                                                                                                                                                                                                                                                                                                                                                                                                                                                                                                                                                                                                                                                                                                                                                                                                                                                                                                                                                                                                                                                                                                                                                                                                                                                                                                                                                                                                                                                                                                                                                                                                                                                                                                                                                                                                                                                                                                                                                                                                                                                                                                                                                                                                                                                                                                                                                                                                                                                                                                                                                                                                                                                                                                                                                                  | Cliniques universitaires Saint-Luc                                                                                                                                                      | UCLouvain/REC/MBLG-CTMA                                                                                                                                                                 | Benoit Kabamba Mukadi; Bertrand Bearzatto; Jean-Luc Gala; Nicolas Pinte; Paul Blanpain; Simon Ophélie; Valentin Coste                                                                                                                                                                                                                                                                                                                                                                                                                                                           |
| EPI_IS1_9596513, EPI_IS1_9596514, EPI_IS1_9596515, EPI_IS1_9596520, EPI_IS1_9596522, EPI_IS1_9596523, EPI_IS1_9596524, EPI_IS1_9596525, EPI_IS1_9596526, EPI_IS1_9596527                                                                                                                                                                                                                                                                                                                                                                                                                                                                                                                                                                                                                                                                                                                                                                                                                                                                                                                                                                                                                                                                                                                                                                                                                                                                                                                                                                                                                                                                                                                                                                                                                                                                                                                                                                                                                                                                                                                                                                                                                                                                                                                                                                                                                                                                                                                                                                                                                                                                                                                                                                                                                                                                                                                                                                                                                                                                                                                                                                                                                                                                                                                                                                                                                                                                                                                                                                                                                                                                                                                                                                                                                                                                                                                                                                                                                                                                                                                                                                                                                                                                                                                                                                                                                                                                                                                                                                                                                                                                                                                                                                                                                                                                                                                                                                                                                                                                                                                                                                                                                                                                                                                                                                                                                                                                                                                                                                                                                                                                                                                                                                                                                                                                                                                                                                                                                                                                                                                                                                                                                                                                                                                                                                                                                                                                                                                                                                                                                                                                                                                                                                                                                                                                                                                                                                                                                                                                                                                                                                                                                                                                                                                                                                                                                                                                                                                                                                                                                                                                                                                                                                                                                                                                                                                                                                                                                                                                                                                                                                                                                                                                                                                                                                                                                                                                                                                                                                                                                                                                                                                                                                                                                                                                                                                                                                                                                                                                                                                                                                                                                                                                                                                                                                                                                                                                                                                                                                                                                                                                                                                                                                                                                                                                                                                                                                                                                                                                                                                                                                                                                                                                                                                                                                                                                                                                                                                                                                                                                                                                                                                                                                                                                                                                                                                                                                                                                                                                                                                                                                                                                                                                                                                                                                                                                                                                                                                                                                                                                                                                                                                                                                                                                                                                                                                                                                                                                                                                                                                                                                                                                                                                                                                                                                                                                                                                                                                                                                                                                                                                                                                                                                                                                                                                                                                                                                                                                                                                                                                                                                                                                                                                                                                                                                                                                                                                                                                                                                                                                                                                                                                                                                                                            | Community Testing Centre                                                                                                                                                                | Hong Kong Department of Health                                                                                                                                                          | Alan K.L. Tsang; Edman T.K. Lam; Ken H.L. Ng; Patricia K. L. Leung; Peter C.W. Yip; Rickjason C.W. Chan                                                                                                                                                                                                                                                                                                                                                                                                                                                                         |
| EPI_IS1_9671255                                                                                                                                                                                                                                                                                                                                                                                                                                                                                                                                                                                                                                                                                                                                                                                                                                                                                                                                                                                                                                                                                                                                                                                                                                                                                                                                                                                                                                                                                                                                                                                                                                                                                                                                                                                                                                                                                                                                                                                                                                                                                                                                                                                                                                                                                                                                                                                                                                                                                                                                                                                                                                                                                                                                                                                                                                                                                                                                                                                                                                                                                                                                                                                                                                                                                                                                                                                                                                                                                                                                                                                                                                                                                                                                                                                                                                                                                                                                                                                                                                                                                                                                                                                                                                                                                                                                                                                                                                                                                                                                                                                                                                                                                                                                                                                                                                                                                                                                                                                                                                                                                                                                                                                                                                                                                                                                                                                                                                                                                                                                                                                                                                                                                                                                                                                                                                                                                                                                                                                                                                                                                                                                                                                                                                                                                                                                                                                                                                                                                                                                                                                                                                                                                                                                                                                                                                                                                                                                                                                                                                                                                                                                                                                                                                                                                                                                                                                                                                                                                                                                                                                                                                                                                                                                                                                                                                                                                                                                                                                                                                                                                                                                                                                                                                                                                                                                                                                                                                                                                                                                                                                                                                                                                                                                                                                                                                                                                                                                                                                                                                                                                                                                                                                                                                                                                                                                                                                                                                                                                                                                                                                                                                                                                                                                                                                                                                                                                                                                                                                                                                                                                                                                                                                                                                                                                                                                                                                                                                                                                                                                                                                                                                                                                                                                                                                                                                                                                                                                                                                                                                                                                                                                                                                                                                                                                                                                                                                                                                                                                                                                                                                                                                                                                                                                                                                                                                                                                                                                                                                                                                                                                                                                                                                                                                                                                                                                                                                                                                                                                                                                                                                                                                                                                                                                                                                                                                                                                                                                                                                                                                                                                                                                                                                                                                                                                                                                                                                                                                                                                                                                                                                                                                                                                                                                                                     | Curative Labs                                                                                                                                                                           | Curative Labs                                                                                                                                                                           | Elías L. Salfati; Eugenia Khoroшева; George Way J.; Cesar Ignacio-Espinosa; Janet Chen; Mikhail Hanewich-Hollatz; Nabjot Sandhu; Sophia Quasem; Vladimir Stepnev; Zhiyi Xie                                                                                                                                                                                                                                                                                                                                                                                                     |
| EPI_IS1_9611222, EPI_IS1_9611223, EPI_IS1_9611224, EPI_IS1_9611225, EPI_IS1_9611227, EPI_IS1_9611228, EPI_IS1_9611230, EPI_IS1_9611233, EPI_IS1_9611234                                                                                                                                                                                                                                                                                                                                                                                                                                                                                                                                                                                                                                                                                                                                                                                                                                                                                                                                                                                                                                                                                                                                                                                                                                                                                                                                                                                                                                                                                                                                                                                                                                                                                                                                                                                                                                                                                                                                                                                                                                                                                                                                                                                                                                                                                                                                                                                                                                                                                                                                                                                                                                                                                                                                                                                                                                                                                                                                                                                                                                                                                                                                                                                                                                                                                                                                                                                                                                                                                                                                                                                                                                                                                                                                                                                                                                                                                                                                                                                                                                                                                                                                                                                                                                                                                                                                                                                                                                                                                                                                                                                                                                                                                                                                                                                                                                                                                                                                                                                                                                                                                                                                                                                                                                                                                                                                                                                                                                                                                                                                                                                                                                                                                                                                                                                                                                                                                                                                                                                                                                                                                                                                                                                                                                                                                                                                                                                                                                                                                                                                                                                                                                                                                                                                                                                                                                                                                                                                                                                                                                                                                                                                                                                                                                                                                                                                                                                                                                                                                                                                                                                                                                                                                                                                                                                                                                                                                                                                                                                                                                                                                                                                                                                                                                                                                                                                                                                                                                                                                                                                                                                                                                                                                                                                                                                                                                                                                                                                                                                                                                                                                                                                                                                                                                                                                                                                                                                                                                                                                                                                                                                                                                                                                                                                                                                                                                                                                                                                                                                                                                                                                                                                                                                                                                                                                                                                                                                                                                                                                                                                                                                                                                                                                                                                                                                                                                                                                                                                                                                                                                                                                                                                                                                                                                                                                                                                                                                                                                                                                                                                                                                                                                                                                                                                                                                                                                                                                                                                                                                                                                                                                                                                                                                                                                                                                                                                                                                                                                                                                                                                                                                                                                                                                                                                                                                                                                                                                                                                                                                                                                                                                                                                                                                                                                                                                                                                                                                                                                                                                                                                                                                                                             | Department for Virology, Molecular Biology and Genome Research, R. G. Luger Center for Public Health Research, National Center for Disease Control and Public Health (NCDC) of Georgia. | Department for Virology, Molecular Biology and Genome Research, R. G. Luger Center for Public Health Research, National Center for Disease Control and Public Health (NCDC) of Georgia. | Adam Kotorskhvili; Amiran Gamkrelidze.; A. Papkhiuri; Ann Machabishvili; Anna Kasradze; Davit Tsaguria; Ekaterine Khamaladze; Ekaterine Zangladze; Ekaterine Zghenti; Giorgi Gogoladze; Giorgi Tomashvili; Gvantsa Brachvili; Gvantsa Chanturia; Irma Burjanadze; Ketevan Sidamonidze; Natia Sabadze; Lela Urushadze; Magda Djeubadze; Maia Alkhashvili; Mari Gavashelidze; Marjan Zakalashvili; Marine Murtskhvaladze; Meri Pantulaia; Nodino Khatuna; Nino Berishvili; Paata Imnadze; Roena Sukhashvili; Salome Jangashvili; Tamara Akhshvili; Tamia Imnadze; Tera Tevdoradze |
| EPI_IS1_9563117, EPI_IS1_9563553, EPI_IS1_9563855, EPI_IS1_9563944, EPI_IS1_9564183, EPI_IS1_9564218, EPI_IS1_9564264, EPI_IS1_9564343, EPI_IS1_9564406, EPI_IS1_9564409, EPI_IS1_9564452, EPI_IS1_9564651, EPI_IS1_9564694, EPI_IS1_9564727, EPI_IS1_9564963, EPI_IS1_9564988, EPI_IS1_9565195, EPI_IS1_9565385, EPI_IS1_9565886, EPI_IS1_9566398, EPI_IS1_9566828, EPI_IS1_9566880, EPI_IS1_9566933, EPI_IS1_9567009, EPI_IS1_9567028, EPI_IS1_9567053, EPI_IS1_9567150, EPI_IS1_9567249, EPI_IS1_9567285, EPI_IS1_9567296, EPI_IS1_9567391, EPI_IS1_9567547, EPI_IS1_9567679, EPI_IS1_9567801, EPI_IS1_9567885, EPI_IS1_9567933, EPI_IS1_9567945, EPI_IS1_9567972, EPI_IS1_9567999, EPI_IS1_9568039, EPI_IS1_9568045, EPI_IS1_9568067, EPI_IS1_9568138, EPI_IS1_9568170, EPI_IS1_9568289, EPI_IS1_9568308, EPI_IS1_9568326, EPI_IS1_9568353, EPI_IS1_9568353, EPI_IS1_9568368, EPI_IS1_9568393, EPI_IS1_9568639, EPI_IS1_9568678, EPI_IS1_9568993, EPI_IS1_9568997, EPI_IS1_9568930, EPI_IS1_9568995, EPI_IS1_9569114, EPI_IS1_9569115, EPI_IS1_9569154, EPI_IS1_9569168, EPI_IS1_9569204, EPI_IS1_9569310, EPI_IS1_9569319, EPI_IS1_9569338, EPI_IS1_9569341, EPI_IS1_9569402, EPI_IS1_9569415, EPI_IS1_9569440, EPI_IS1_9569460, EPI_IS1_9569488, EPI_IS1_9569675, EPI_IS1_9569752, EPI_IS1_9569767, EPI_IS1_9569809, EPI_IS1_9569835, EPI_IS1_9569859, EPI_IS1_9569899, EPI_IS1_9569911, EPI_IS1_9569914, EPI_IS1_9569915, EPI_IS1_9569916, EPI_IS1_9569921, EPI_IS1_9569930, EPI_IS1_9569939, EPI_IS1_9569940, EPI_IS1_9569941, EPI_IS1_9569942, EPI_IS1_9569943, EPI_IS1_9569944, EPI_IS1_9569945, EPI_IS1_9569946, EPI_IS1_9569947, EPI_IS1_9569948, EPI_IS1_9569949, EPI_IS1_9569950, EPI_IS1_9569951, EPI_IS1_9569952, EPI_IS1_9569953, EPI_IS1_9569954, EPI_IS1_9569955, EPI_IS1_9569956, EPI_IS1_9569957, EPI_IS1_9569958, EPI_IS1_9569959, EPI_IS1_9569960, EPI_IS1_9569961, EPI_IS1_9569962, EPI_IS1_9569963, EPI_IS1_9569964, EPI_IS1_9569965, EPI_IS1_9569966, EPI_IS1_9569967, EPI_IS1_9569968, EPI_IS1_9569969, EPI_IS1_9569970, EPI_IS1_9569971, EPI_IS1_9569972, EPI_IS1_9569973, EPI_IS1_9569974, EPI_IS1_9569975, EPI_IS1_9569976, EPI_IS1_9569977, EPI_IS1_9569978, EPI_IS1_9569979, EPI_IS1_9569980, EPI_IS1_9569981, EPI_IS1_9569982, EPI_IS1_9569983, EPI_IS1_9569984, EPI_IS1_9569985, EPI_IS1_9569986, EPI_IS1_9569987, EPI_IS1_9569988, EPI_IS1_9569989, EPI_IS1_9569990, EPI_IS1_9569991, EPI_IS1_9569992, EPI_IS1_9569993, EPI_IS1_9569994, EPI_IS1_9569995, EPI_IS1_9569996, EPI_IS1_9569997, EPI_IS1_9569998, EPI_IS1_9569999, EPI_IS1_9570000, EPI_IS1_9570001, EPI_IS1_9570002, EPI_IS1_9570003, EPI_IS1_9570004, EPI_IS1_9570005, EPI_IS1_9570006, EPI_IS1_9570007, EPI_IS1_9570008, EPI_IS1_9570009, EPI_IS1_9570010, EPI_IS1_9570011, EPI_IS1_9570012, EPI_IS1_9570013, EPI_IS1_9570014, EPI_IS1_9570015, EPI_IS1_9570016, EPI_IS1_9570017, EPI_IS1_9570018, EPI_IS1_9570019, EPI_IS1_9570020, EPI_IS1_9570021, EPI_IS1_9570022, EPI_IS1_9570023, EPI_IS1_9570024, EPI_IS1_9570025, EPI_IS1_9570026, EPI_IS1_9570027, EPI_IS1_9570028, EPI_IS1_9570029, EPI_IS1_9570030, EPI_IS1_9570031, EPI_IS1_9570032, EPI_IS1_9570033, EPI_IS1_9570034, EPI_IS1_9570035, EPI_IS1_9570036, EPI_IS1_9570037, EPI_IS1_9570038, EPI_IS1_9570039, EPI_IS1_9570040, EPI_IS1_9570041, EPI_IS1_9570042, EPI_IS1_9570043, EPI_IS1_9570044, EPI_IS1_9570045, EPI_IS1_9570046, EPI_IS1_9570047, EPI_IS1_9570048, EPI_IS1_9570049, EPI_IS1_9570050, EPI_IS1_9570051, EPI_IS1_9570052, EPI_IS1_9570053, EPI_IS1_9570054, EPI_IS1_9570055, EPI_IS1_9570056, EPI_IS1_9570057, EPI_IS1_9570058, EPI_IS1_9570059, EPI_IS1_9570060, EPI_IS1_9570061, EPI_IS1_9570062, EPI_IS1_9570063, EPI_IS1_9570064, EPI_IS1_9570065, EPI_IS1_9570066, EPI_IS1_9570067, EPI_IS1_9570068, EPI_IS1_9570069, EPI_IS1_9570070, EPI_IS1_9570071, EPI_IS1_9570072, EPI_IS1_9570073, EPI_IS1_9570074, EPI_IS1_9570075, EPI_IS1_9570076, EPI_IS1_9570077, EPI_IS1_9570078, EPI_IS1_9570079, EPI_IS1_9570080, EPI_IS1_9570081, EPI_IS1_9570082, EPI_IS1_9570083, EPI_IS1_9570084, EPI_IS1_9570085, EPI_IS1_9570086, EPI_IS1_9570087, EPI_IS1_9570088, EPI_IS1_9570089, EPI_IS1_9570090, EPI_IS1_9570091, EPI_IS1_9570092, EPI_IS1_9570093, EPI_IS1_9570094, EPI_IS1_9570095, EPI_IS1_9570096, EPI_IS1_9570097, EPI_IS1_9570098, EPI_IS1_9570099, EPI_IS1_9570100, EPI_IS1_9570101, EPI_IS1_9570102, EPI_IS1_9570103, EPI_IS1_9570104, EPI_IS1_9570105, EPI_IS1_9570106, EPI_IS1_9570107, EPI_IS1_9570108, EPI_IS1_9570109, EPI_IS1_9570110, EPI_IS1_9570111, EPI_IS1_9570112, EPI_IS1_9570113, EPI_IS1_9570114, EPI_IS1_9570115, EPI_IS1_9570116, EPI_IS1_9570117, EPI_IS1_9570118, EPI_IS1_9570119, EPI_IS1_9570120, EPI_IS1_9570121, EPI_IS1_9570122, EPI_IS1_9570123, EPI_IS1_9570124, EPI_IS1_9570125, EPI_IS1_9570126, EPI_IS1_9570127, EPI_IS1_9570128, EPI_IS1_9570129, EPI_IS1_9570130, EPI_IS1_9570131, EPI_IS1_9570132, EPI_IS1_9570133, EPI_IS1_9570134, EPI_IS1_9570135, EPI_IS1_9570136, EPI_IS1_9570137, EPI_IS1_9570138, EPI_IS1_9570139, EPI_IS1_9570140, EPI_IS1_9570141, EPI_IS1_9570142, EPI_IS1_9570143, EPI_IS1_9570144, EPI_IS1_9570145, EPI_IS1_9570146, EPI_IS1_9570147, EPI_IS1_9570148, EPI_IS1_9570149, EPI_IS1_9570150, EPI_IS1_9570151, EPI_IS1_9570152, EPI_IS1_9570153, EPI_IS1_9570154, EPI_IS1_9570155, EPI_IS1_9570156, EPI_IS1_9570157, EPI_IS1_9570158, EPI_IS1_9570159, EPI_IS1_9570160, EPI_IS1_9570161, EPI_IS1_9570162, EPI_IS1_9570163, EPI_IS1_9570164, EPI_IS1_9570165, EPI_IS1_9570166, EPI_IS1_9570167, EPI_IS1_9570168, EPI_IS1_9570169, EPI_IS1_9570170, EPI_IS1_9570171, EPI_IS1_9570172, EPI_IS1_9570173, EPI_IS1_9570174, EPI_IS1_9570175, EPI_IS1_9570176, EPI_IS1_9570177, EPI_IS1_9570178, EPI_IS1_9570179, EPI_IS1_9570180, EPI_IS1_9570181, EPI_IS1_9570182, EPI_IS1_9570183, EPI_IS1_9570184, EPI_IS1_9570185, EPI_IS1_9570186, EPI_IS1_9570187, EPI_IS1_9570188, EPI_IS1_9570189, EPI_IS1_9570190, EPI_IS1_9570191, EPI_IS1_9570192, EPI_IS1_9570193, EPI_IS1_9570194, EPI_IS1_9570195, EPI_IS1_9570196, EPI_IS1_9570197, EPI_IS1_9570198, EPI_IS1_9570199, EPI_IS1_9570200, EPI_IS1_9570201, EPI_IS1_9570202, EPI_IS1_9570203, EPI_IS1_9570204, EPI_IS1_9570205, EPI_IS1_9570206, EPI_IS1_9570207, EPI_IS1_9570208, EPI_IS1_9570209, EPI_IS1_9570210, EPI_IS1_9570211, EPI_IS1_9570212, EPI_IS1_9570213, EPI_IS1_9570214, EPI_IS1_9570215, EPI_IS1_9570216, EPI_IS1_9570217, EPI_IS1_9570218, EPI_IS1_9570219, EPI_IS1_9570220, EPI_IS1_9570221, EPI_IS1_9570222, EPI_IS1_9570223, EPI_IS1_9570224, EPI_IS1_9570225, EPI_IS1_9570226, EPI_IS1_9570227, EPI_IS1_9570228, EPI_IS1_9570229, EPI_IS1_9570230, EPI_IS1_9570231, EPI_IS1_9570232, EPI_IS1_9570233, EPI_IS1_9570234, EPI_IS1_9570235, EPI_IS1_9570236, EPI_IS1_9570237, EPI_IS1_9570238, EPI_IS1_9570239, EPI_IS1_9570240, EPI_IS1_9570241, EPI_IS1_9570242, EPI_IS1_9570243, EPI_IS1_9570244, EPI_IS1_9570245, EPI_IS1_9570246, EPI_IS1_9570247, EPI_IS1_9570248, EPI_IS1_9570249, EPI_IS1_9570250, EPI_IS1_9570251, EPI_IS1_9570252, EPI_IS1_9570253, EPI_IS1_9570254, EPI_IS1_9570255, EPI_IS1_9570256, EPI_IS1_9570257, EPI_IS1_9570258, EPI_IS1_9570259, EPI_IS1_9570260, EPI_IS1_9570261, EPI_IS1_9570262, EPI_IS1_9570263, EPI_IS1_9570264, EPI_IS1_9570265, EPI_IS1_9570266, EPI_IS1_9570267, EPI_IS1_9570268, EPI_IS1_9570269, EPI_IS1_9570270, EPI_IS1_9570271, EPI_IS1_9570272, EPI_IS1_9570273, EPI_IS1_9570274, EPI_IS1_9570275, EPI_IS1_9570276, EPI_IS1_9570277, EPI_IS1_9570278, EPI_IS1_9570279, EPI_IS1_9570280, EPI_IS1_9570281, EPI_IS1_9570282, EPI_IS1_9570283, EPI_IS1_9570284, EPI_IS1_9570285, EPI_IS1_9570286, EPI_IS1_9570287, EPI_IS1_9570288, EPI_IS1_9570289, EPI_IS1_9570290, EPI_IS1_9570291, EPI_IS1_9570292, EPI_IS1_9570293, EPI_IS1_9570294, EPI_IS1_9570295, EPI_IS1_9570296, EPI_IS1_9570297, EPI_IS1_9570298, EPI_IS1_9570299, EPI_IS1_9570300, EPI_IS1_9570301, EPI_IS1_9570302, EPI_IS1_9570303, EPI_IS1_9570304, EPI_IS1_9570305, EPI_IS1_9570306, EPI_IS1_9570307, EPI_IS1_9570308, EPI_IS1_9570309, EPI_IS1_9570310, EPI_IS1_9570311, EPI_IS1_9570312, EPI_IS1_9570313, EPI_IS1_9570314, EPI_IS1_9570315, EPI_IS1_9570316, EPI_IS1_9570317, EPI_IS1_9570318, EPI_IS1_9570319, EPI_IS1_9570320, EPI_IS1_9570321, EPI_IS1_9570322, EPI_IS1_9570323, EPI_IS1_9570324, EPI_IS1_9570325, EPI_IS1_9570326, EPI_IS1_9570327, EPI_IS1_9570328, EPI_IS1_9570329, EPI_IS1_9570330, EPI_IS1_9570331, EPI_IS1_9570332, EPI_IS1_9570333, EPI_IS1_9570334, EPI_IS1_9570335, EPI_IS1_9570336, EPI_IS1_9570337, EPI_IS1_9570338, EPI_IS1_9570339, EPI_IS1_9570340, EPI_IS1_9570341, EPI_IS1_9570342, EPI_IS1_9570343, EPI_IS1_9570344, EPI_IS1_9570345, EPI_IS1_9570346, EPI_IS1_9570347, EPI_IS1_9570348, EPI_IS1_9570349, EPI_IS1_9570350, EPI_IS1_9570351, EPI_IS1_9570352, EPI_IS1_9570353, EPI_IS1_9570354, EPI_IS1_9570355, EPI_IS1_9570356, EPI_IS1_9570357, EPI_IS1_9570358, EPI_IS1_9570359, EPI_IS1_9570360, EPI_IS1_9570361, EPI_IS1_9570362, EPI_IS1_9570363, EPI_IS1_9570364, EPI_IS1_9570365, EPI_IS1_9570366, EPI_IS1_9570367, EPI_IS1_9570368, EPI_IS1_9570369, EPI_IS1_9570370, EPI_IS1_9570371, EPI_IS1_9570372, EPI_IS1_9570373, EPI_IS1_9570374, EPI_IS1_9570375, EPI_IS1_9570376, EPI_IS1_9570377, EPI_IS1_9570378, EPI_IS1_9570379, EPI_IS1_9570380, EPI_IS1_9570381, EPI_IS1_9570382, EPI_IS1_9570383, EPI_IS1_9570384, EPI_IS1_9570385, EPI_IS1_9570386, EPI_IS1_9570387, EPI_IS1_9570388, EPI_IS1_9570389, EPI_IS1_9570390, EPI_IS1_9570391, EPI_IS1_9570392, EPI_IS1_9570393, EPI_IS1_9570394, EPI_IS1_9570395, EPI_IS1_9570396, EPI_IS1_9570397, EPI_IS1_9570398, EPI_IS1_9570399, EPI_IS1_9570400, EPI_IS1_9570401, EPI_IS1_9570402, EPI_IS1_9570403, EPI_IS1_9570404, EPI_IS1_9570405, EPI_IS1_9570406, EPI_IS1_9570407, EPI_IS1_9570408, EPI_IS1_9570409, EPI_IS1_9570410, EPI_IS1_9570411, EPI_IS1_9570412, EPI_IS1_9570413, EPI_IS1_9570414, EPI_IS1_9570415, EPI_IS1_9570416, EPI_IS1_9570417, EPI_IS1_9570418, EPI_IS1_9570419, EPI_IS1_9570420, EPI_IS1_9570421, EPI_IS1_9570422, EPI_IS1_9570423, EPI_IS1_9570424, EPI_IS1_9570425, EPI_IS1_9570426, EPI_IS1_9570427, EPI_IS1_9570428, EPI_IS1_9570429, EPI_IS1_9570430, EPI_IS1_9570431, EPI_IS1_9570432, EPI_IS1_9570433, EPI_IS1_9570434, EPI_IS1_9570435, EPI_IS1_9570436, EPI_IS1_9570437, EPI_IS1_9570438, EPI_IS1_9570439, EPI_IS1_9570440, EPI_IS1_9570441, EPI_IS1_9570442, EPI_IS1_9570443, EPI_IS1_9570444, EPI_IS1_9570445, EPI_IS1_9570446, EPI_IS1_9570447, EPI_IS1_9570448, EPI_IS1_9570449, EPI_IS1_9570450, EPI_IS1_9570451, EPI_IS1_9570452, EPI_IS1_9570453, EPI_IS1_9570454, EPI_IS1_9570455, EPI_IS1_9570456, EPI_IS1_9570457, EPI_IS1_9570458, EPI_IS1_9570459, EPI_IS1_9570460, EPI_IS1_9570461, EPI_IS1_9570462, EPI_IS1_9570463, EPI_IS1_9570464, EPI_IS1_9570465, EPI_IS1_9570466, EPI_IS1_9570467, EPI_IS1_9570468, EPI_IS1_9570469, EPI_IS1_9570470, EPI_IS1_9570471, EPI_IS1_9570472, EPI_IS1_9570473, EPI_IS1_9570474, EPI_IS1_9570475, EPI_IS1_9570476, EPI_IS1_9570477, EPI_IS1_9570478, EPI_IS1_9570479, EPI_IS1_9570480, EPI_IS1_9570481, EPI_IS1_9570482, EPI_IS1_9570483, EPI_IS1_9570484, EPI_IS1_9570485, EPI_IS1_9570486, EPI_IS1_9570487, EPI_IS1_9570488, EPI_IS1_9570489, EPI_IS1_9570490, EPI_IS1_9570491, EPI_IS1_9570492, EPI_IS1_9570493, EPI_IS1_9570494, EPI_IS1_9570495, EPI_IS1_9570496, EPI_IS1_9570497, EPI_IS1_9570498, EPI_IS1_9570499, EPI_IS1_9570500, EPI_IS1_9570501, EPI_IS1_9570502, EPI_IS1_9570503, EPI_IS1_9570504, EPI_IS1_9570505, EPI_IS1_9570506, EPI_IS1_9570507, EPI_IS1_9570508, EPI_IS1_9570509, EPI_IS1_9570510, EPI_IS1_9570511, EPI_IS1_9570512, EPI_IS1_9570513, EPI_IS1_9570514, EPI_IS1_9570515, EPI_IS1_9570516, EPI_IS1_9570517, EPI_IS1_9570518, EPI_IS1_9570519, EPI_IS1_9570520, EPI_IS1_9570521, EPI_IS1_9570522, EPI_IS1_9570523, EPI_IS1_9570524, EPI_IS1_9570525, EPI_IS1_9570526, EPI_IS1_9570527, EPI_IS1_9570528, EPI_IS1_9570529, EPI_IS1_9570530, EPI_IS1_9570531, EPI_IS1_9570532, EPI_IS1_9570533, EPI_IS1_9570534, EPI_IS1_9570535, EPI_IS1_9570536, EPI_IS1_9570537, EPI_IS1_9570538, EPI_IS1_9570539, EPI_IS1_9570540, EPI_IS1_9570541, EPI_IS1_9570542, EPI_IS1_9570543, EPI_IS1_9570544, EPI_IS1_9570545, EPI_IS1_9570546, EPI_IS1_9570547, EPI_IS1_9570548, EPI_IS1_9570549, EPI_IS1_9570550, EPI_IS1_9570551, EPI_IS1_9570552, EPI_IS1_9570553, EPI_IS1_9570554, EPI_IS1_9570555, EPI_IS1_9570556, EPI_IS1_9570557, EPI_IS1_9570558, EPI_IS1_9570559, EPI_IS1_9570560, EPI_IS1_9570561, EPI_IS1_9570562, EPI_IS1_9570563, EPI_IS1_9570564, EPI_IS1_9570565, EPI_IS1_9570566, EPI_IS1_9570567, EPI_IS1_9570568, EPI_IS1_9570569, EPI_IS1_9570570, EPI_IS1_9570571, EPI_IS1_9570572, EPI_IS1_9570573, EPI_IS1_9570574, EPI_IS1_9570575, EPI_IS1_9570576, EPI_IS1_9570577, EPI_IS1_9570578, EPI_IS1_9570579, EPI_IS1_9570580, EPI_IS1_9570581, EPI_IS1_9570582, EPI_IS1_9570583, EPI_IS1_9570584, EPI_IS1_9570585, EPI_IS1_9570586, EPI_IS1_9570587, EPI_IS1_9570588, EPI_IS1_9570589, EPI_IS1_9570590, EPI_IS1_9570591, EPI_IS1_9570592, EPI_IS1_9570593, EPI_IS1_9570594, EPI_IS1_9570595, EPI_IS1_9570596, EPI_IS1_9570597, EPI_IS1_9570598, EPI_IS1_9570599, EPI_IS1_9570600, EPI_IS1_9570601, EPI_IS1_9570602, EPI_IS1_9570603, EPI_IS1_9570604, EPI_IS1_9570605, EPI_IS1_9570606, EPI_IS1_9570607, EPI_IS1_9570608, EPI_IS1_9570609, EPI_IS1_9570610, EPI_IS1_9570611, EPI_IS1_9570612, EPI_IS1_9570613, EPI_IS1_9570614, EPI_IS1_9570615, EPI_IS1_9570616, EPI_IS1_9570617, EPI_IS1_9570618, EPI_IS1_9570619, EPI_IS1_9570620, EPI_IS1_9570621, EPI_IS1_9570622, EPI_IS1_9570623, EPI_IS1_9570624, EPI_IS1_9570625, EPI_IS1_9570626, EPI_IS1_9570627, EPI_IS1_9570628, EPI_IS1_9570629, EPI_IS1_9570630, EPI_IS1_9570631, EPI_IS1_9570632, EPI_IS1_9 |                                                                                                                                                                                         |                                                                                                                                                                                         |                                                                                                                                                                                                                                                                                                                                                                                                                                                                                                                                                                                 |





|                                                                                                                                                                                                                                                                                                                                                                                                                                                                                                                                                                                                                                                                                                                                                                                                                                                                                                                                                                                                                                                                                                                                                                                                                                                                                                                                                                                                                                                                                                                                                                                                                                                                                                                                                                                                                                                                                                                                                                                                                                                                                                                                                                                                                                                                                                                                                                                                                                                                                                                                                                                                                                                                                                                                                                                                                                                                                                                                                                                                                                                                                                                                                                                                                                                                                                                                                                                                                                                                                                                                                                                                                                                                                                                                                                                                                                                                                                                                                                                                                                                                                                                                                                                                                                                                                                                                                                                                                                                                                                                                                                                                                                                                                                                                                                                                                                                                                                                                                                                                                                                                                                                                                                                                                                                                                                                                                                                                                                                                                                                                                                                                                                                                                                                                                                                                                                                                                                                                                                                                                                                                                                                                                                                                                                                                                                                                                                                                                                                                                                                                                                                                                                                                                                                                                                                                                                                                                                                                                                                                                                                                                                                                                                                                                                                                                                                                                                                                                                                                                                                                                                                                                                                                                                                                                                                                                                                                                                                                                                                                                                                                                                                                                                                                                                                                                                                                                                                                                                                                                                                                                                                                                                                                                                                                                                                                                                                                                                                                                                                                                                                                                                                                                                                                                                                                                                                                                                                                                                                                                                                                                                                                                                                                                                                                                                                                                                                                                                                                                                                                                                                                                                                                                                                                                                                                                                                                                                                                                                                                                                                                                                                                                                                                                                                                                                                                                                                                                                                                                                                                                                                                                                                                                                                                                                                                                                                                                                                                                                                                                                                                                                                                                                                                                                                                                                                                                                                                                                                                                                                                                                                                                                                                                                                                                                                                                                                                                                                                                                                                                                                                                                                                                                                                                    |                                                                                                                       |                                                                                                                       |  |  |  |                                                                                                                                                                                                                                                                                                                                                                                                                 |
|------------------------------------------------------------------------------------------------------------------------------------------------------------------------------------------------------------------------------------------------------------------------------------------------------------------------------------------------------------------------------------------------------------------------------------------------------------------------------------------------------------------------------------------------------------------------------------------------------------------------------------------------------------------------------------------------------------------------------------------------------------------------------------------------------------------------------------------------------------------------------------------------------------------------------------------------------------------------------------------------------------------------------------------------------------------------------------------------------------------------------------------------------------------------------------------------------------------------------------------------------------------------------------------------------------------------------------------------------------------------------------------------------------------------------------------------------------------------------------------------------------------------------------------------------------------------------------------------------------------------------------------------------------------------------------------------------------------------------------------------------------------------------------------------------------------------------------------------------------------------------------------------------------------------------------------------------------------------------------------------------------------------------------------------------------------------------------------------------------------------------------------------------------------------------------------------------------------------------------------------------------------------------------------------------------------------------------------------------------------------------------------------------------------------------------------------------------------------------------------------------------------------------------------------------------------------------------------------------------------------------------------------------------------------------------------------------------------------------------------------------------------------------------------------------------------------------------------------------------------------------------------------------------------------------------------------------------------------------------------------------------------------------------------------------------------------------------------------------------------------------------------------------------------------------------------------------------------------------------------------------------------------------------------------------------------------------------------------------------------------------------------------------------------------------------------------------------------------------------------------------------------------------------------------------------------------------------------------------------------------------------------------------------------------------------------------------------------------------------------------------------------------------------------------------------------------------------------------------------------------------------------------------------------------------------------------------------------------------------------------------------------------------------------------------------------------------------------------------------------------------------------------------------------------------------------------------------------------------------------------------------------------------------------------------------------------------------------------------------------------------------------------------------------------------------------------------------------------------------------------------------------------------------------------------------------------------------------------------------------------------------------------------------------------------------------------------------------------------------------------------------------------------------------------------------------------------------------------------------------------------------------------------------------------------------------------------------------------------------------------------------------------------------------------------------------------------------------------------------------------------------------------------------------------------------------------------------------------------------------------------------------------------------------------------------------------------------------------------------------------------------------------------------------------------------------------------------------------------------------------------------------------------------------------------------------------------------------------------------------------------------------------------------------------------------------------------------------------------------------------------------------------------------------------------------------------------------------------------------------------------------------------------------------------------------------------------------------------------------------------------------------------------------------------------------------------------------------------------------------------------------------------------------------------------------------------------------------------------------------------------------------------------------------------------------------------------------------------------------------------------------------------------------------------------------------------------------------------------------------------------------------------------------------------------------------------------------------------------------------------------------------------------------------------------------------------------------------------------------------------------------------------------------------------------------------------------------------------------------------------------------------------------------------------------------------------------------------------------------------------------------------------------------------------------------------------------------------------------------------------------------------------------------------------------------------------------------------------------------------------------------------------------------------------------------------------------------------------------------------------------------------------------------------------------------------------------------------------------------------------------------------------------------------------------------------------------------------------------------------------------------------------------------------------------------------------------------------------------------------------------------------------------------------------------------------------------------------------------------------------------------------------------------------------------------------------------------------------------------------------------------------------------------------------------------------------------------------------------------------------------------------------------------------------------------------------------------------------------------------------------------------------------------------------------------------------------------------------------------------------------------------------------------------------------------------------------------------------------------------------------------------------------------------------------------------------------------------------------------------------------------------------------------------------------------------------------------------------------------------------------------------------------------------------------------------------------------------------------------------------------------------------------------------------------------------------------------------------------------------------------------------------------------------------------------------------------------------------------------------------------------------------------------------------------------------------------------------------------------------------------------------------------------------------------------------------------------------------------------------------------------------------------------------------------------------------------------------------------------------------------------------------------------------------------------------------------------------------------------------------------------------------------------------------------------------------------------------------------------------------------------------------------------------------------------------------------------------------------------------------------------------------------------------------------------------------------------------------------------------------------------------------------------------------------------------------------------------------------------------------------------------------------------------------------------------------------------------------------------------------------------------------------------------------------------------------------------------------------------------------------------------------------------------------------------------------------------------------------------------------------------------------------------------------------------------------------------------------------------------------------------------------------------------------------------------------------------------------------------------------------------------------------------------------------------------------------------------------------------------------------------------------------------------------------------------------------------------------------------------------------------------------------------------------------------------------------------------------------------------------------------------------------------------------------------------------------------------------------------------------------------------------------------------------------------------------------------------------------------------------------------------------------------------------------------------------------------------------------------------------------------------------------------------------------------------------------------------------------------------------------------------------------------------------------------------------------------------------------------------------------------------------------------------------------------------------------------------------------------------------------------------------------------------------------------------------------------------------------------------------------------------------------------------------------------------------------------------------------------------------------------------------------------------------------------------------------------------------------------------------------------------------------------------------------------------------------------------------------------------------------------------------------------------------------------------------------------------------------------------------------------------------------------------------------------------------------------------------------------------------------------------------------------------------------------|-----------------------------------------------------------------------------------------------------------------------|-----------------------------------------------------------------------------------------------------------------------|--|--|--|-----------------------------------------------------------------------------------------------------------------------------------------------------------------------------------------------------------------------------------------------------------------------------------------------------------------------------------------------------------------------------------------------------------------|
| EPI_ISL_9650748, EPI_ISL_9650808, EPI_ISL_9651240, EPI_ISL_9651382, EPI_ISL_9651565, EPI_ISL_9651806, EPI_ISL_9651876, EPI_ISL_9652017, EPI_ISL_9652206, EPI_ISL_9652508, EPI_ISL_9652535, EPI_ISL_9652648, EPI_ISL_9652738, EPI_ISL_9652890, EPI_ISL_9653050, EPI_ISL_9653170, EPI_ISL_9653239, EPI_ISL_9653248, EPI_ISL_9653253, EPI_ISL_9653268, EPI_ISL_9653314, EPI_ISL_9653455, EPI_ISL_9653593, EPI_ISL_9653652, EPI_ISL_9653701, EPI_ISL_9653710, EPI_ISL_9653736, EPI_ISL_9653870, EPI_ISL_9654135, EPI_ISL_9654258, EPI_ISL_9654267, EPI_ISL_9654371, EPI_ISL_9654439, EPI_ISL_9654447, EPI_ISL_9654542, EPI_ISL_9654565, EPI_ISL_9654602, EPI_ISL_9654604, EPI_ISL_9654661, EPI_ISL_9654723, EPI_ISL_9655399, EPI_ISL_9662499, EPI_ISL_9660083, EPI_ISL_9660642, EPI_ISL_9660775, EPI_ISL_9660850, EPI_ISL_9661402, EPI_ISL_9661439, EPI_ISL_9661616, EPI_ISL_9661732, EPI_ISL_9661718, EPI_ISL_9661816, EPI_ISL_9662001, EPI_ISL_9662324, EPI_ISL_9664068, EPI_ISL_9664490, EPI_ISL_9664641, EPI_ISL_9738677, EPI_ISL_9738677, EPI_ISL_9739750, EPI_ISL_9739821, EPI_ISL_9739980, EPI_ISL_9740018, EPI_ISL_9740077, EPI_ISL_9740121, EPI_ISL_9740141, EPI_ISL_9740308, EPI_ISL_9740327, EPI_ISL_9740426, EPI_ISL_9740716, EPI_ISL_9741025, EPI_ISL_9741316, EPI_ISL_9741541, EPI_ISL_9741559, EPI_ISL_9741666, EPI_ISL_9741785, EPI_ISL_9741814, EPI_ISL_9741847, EPI_ISL_9741882, EPI_ISL_9741888, EPI_ISL_9742180, EPI_ISL_9742568, EPI_ISL_9742576, EPI_ISL_9742606, EPI_ISL_9742888, EPI_ISL_9743225, EPI_ISL_9743292, EPI_ISL_9743352, EPI_ISL_9743538, EPI_ISL_9744616, EPI_ISL_9744616, EPI_ISL_9744557, EPI_ISL_9744607, EPI_ISL_9745504, EPI_ISL_9745528, EPI_ISL_9745579, EPI_ISL_9745685, EPI_ISL_9745816, EPI_ISL_9745991, EPI_ISL_9746073, EPI_ISL_9746180, EPI_ISL_9746724                                                                                                                                                                                                                                                                                                                                                                                                                                                                                                                                                                                                                                                                                                                                                                                                                                                                                                                                                                                                                                                                                                                                                                                                                                                                                                                                                                                                                                                                                                                                                                                                                                                                                                                                                                                                                                                                                                                                                                                                                                                                                                                                                                                                                                                                                                                                                                                                                                                                                                                                                                                                                                                                                                                                                                                                                                                                                                                                                                                                                                                                                                                                                                                                                                                                                                                                                                                                                                                                                                                                                                                                                                                                                                                                                                                                                                                                                                                                                                                                                                                                                                                                                                                                                                                                                                                                                                                                                                                                                                                                                                                                                                                                                                                                                                                                                                                                                                                                                                                                                                                                                                                                                                                                                                                                                                                                                                                                                                                                                                                                                                                                                                                                                                                                                                                                                                                                                                                                                                                                                                                                                                                                                                                                                                                                                                                                                                                                                                                                                                                                                                                                                                                                                                                                                                                                                                                                                                                                                                                                                                                                                                                                                                                                                                                                                                                                                                                                                                                                                                                                                                                                                                                                                                                                                                                                                                                                                                                                                                                                                                                                                                                                                                                                                                                                                                                                                                                                                                                                                                                                                                                                                                                                                                                                                                                                                                                                                                                                                                                                                                                                                                                                                                                                                                                                                                                                                                                                                                                                                                                                                                                                                                                                                                                                                                                                                                                                                                                                                                                                                                                                                                                                                                                                                                                                                                                                                                                                                                                                                                                                                                                                                                                                                                                                                                                                                                                                               | Department of Clinical Microbiology, Odense University Hospital, Odense, Denmark                                      | Statens Serum Institut Bioinformatics and Microbial Genomics                                                          |  |  |  | Danish Covid-19 Genesome Consortium                                                                                                                                                                                                                                                                                                                                                                             |
| EPI_ISL_9751037, EPI_ISL_9751045                                                                                                                                                                                                                                                                                                                                                                                                                                                                                                                                                                                                                                                                                                                                                                                                                                                                                                                                                                                                                                                                                                                                                                                                                                                                                                                                                                                                                                                                                                                                                                                                                                                                                                                                                                                                                                                                                                                                                                                                                                                                                                                                                                                                                                                                                                                                                                                                                                                                                                                                                                                                                                                                                                                                                                                                                                                                                                                                                                                                                                                                                                                                                                                                                                                                                                                                                                                                                                                                                                                                                                                                                                                                                                                                                                                                                                                                                                                                                                                                                                                                                                                                                                                                                                                                                                                                                                                                                                                                                                                                                                                                                                                                                                                                                                                                                                                                                                                                                                                                                                                                                                                                                                                                                                                                                                                                                                                                                                                                                                                                                                                                                                                                                                                                                                                                                                                                                                                                                                                                                                                                                                                                                                                                                                                                                                                                                                                                                                                                                                                                                                                                                                                                                                                                                                                                                                                                                                                                                                                                                                                                                                                                                                                                                                                                                                                                                                                                                                                                                                                                                                                                                                                                                                                                                                                                                                                                                                                                                                                                                                                                                                                                                                                                                                                                                                                                                                                                                                                                                                                                                                                                                                                                                                                                                                                                                                                                                                                                                                                                                                                                                                                                                                                                                                                                                                                                                                                                                                                                                                                                                                                                                                                                                                                                                                                                                                                                                                                                                                                                                                                                                                                                                                                                                                                                                                                                                                                                                                                                                                                                                                                                                                                                                                                                                                                                                                                                                                                                                                                                                                                                                                                                                                                                                                                                                                                                                                                                                                                                                                                                                                                                                                                                                                                                                                                                                                                                                                                                                                                                                                                                                                                                                                                                                                                                                                                                                                                                                                                                                                                                                                                                                                                   | Department of Microbiology, University Hospital in Pilsen                                                             | Department of Microbiology, University Hospital in Pilsen                                                             |  |  |  | Jaroslav Hrabac; Katerina Chudejova; Katerina Vikova; Petra Kocova; Vendula Heringova                                                                                                                                                                                                                                                                                                                           |
| EPI_ISL_9651655, EPI_ISL_9651656, EPI_ISL_9651658, EPI_ISL_9651659, EPI_ISL_9651660, EPI_ISL_9651661, EPI_ISL_9651662, EPI_ISL_9651663, EPI_ISL_9651664, EPI_ISL_9651665                                                                                                                                                                                                                                                                                                                                                                                                                                                                                                                                                                                                                                                                                                                                                                                                                                                                                                                                                                                                                                                                                                                                                                                                                                                                                                                                                                                                                                                                                                                                                                                                                                                                                                                                                                                                                                                                                                                                                                                                                                                                                                                                                                                                                                                                                                                                                                                                                                                                                                                                                                                                                                                                                                                                                                                                                                                                                                                                                                                                                                                                                                                                                                                                                                                                                                                                                                                                                                                                                                                                                                                                                                                                                                                                                                                                                                                                                                                                                                                                                                                                                                                                                                                                                                                                                                                                                                                                                                                                                                                                                                                                                                                                                                                                                                                                                                                                                                                                                                                                                                                                                                                                                                                                                                                                                                                                                                                                                                                                                                                                                                                                                                                                                                                                                                                                                                                                                                                                                                                                                                                                                                                                                                                                                                                                                                                                                                                                                                                                                                                                                                                                                                                                                                                                                                                                                                                                                                                                                                                                                                                                                                                                                                                                                                                                                                                                                                                                                                                                                                                                                                                                                                                                                                                                                                                                                                                                                                                                                                                                                                                                                                                                                                                                                                                                                                                                                                                                                                                                                                                                                                                                                                                                                                                                                                                                                                                                                                                                                                                                                                                                                                                                                                                                                                                                                                                                                                                                                                                                                                                                                                                                                                                                                                                                                                                                                                                                                                                                                                                                                                                                                                                                                                                                                                                                                                                                                                                                                                                                                                                                                                                                                                                                                                                                                                                                                                                                                                                                                                                                                                                                                                                                                                                                                                                                                                                                                                                                                                                                                                                                                                                                                                                                                                                                                                                                                                                                                                                                                                                                                                                                                                                                                                                                                                                                                                                                                                                                                                                                                                           |                                                                                                                       |                                                                                                                       |  |  |  |                                                                                                                                                                                                                                                                                                                                                                                                                 |
| see above                                                                                                                                                                                                                                                                                                                                                                                                                                                                                                                                                                                                                                                                                                                                                                                                                                                                                                                                                                                                                                                                                                                                                                                                                                                                                                                                                                                                                                                                                                                                                                                                                                                                                                                                                                                                                                                                                                                                                                                                                                                                                                                                                                                                                                                                                                                                                                                                                                                                                                                                                                                                                                                                                                                                                                                                                                                                                                                                                                                                                                                                                                                                                                                                                                                                                                                                                                                                                                                                                                                                                                                                                                                                                                                                                                                                                                                                                                                                                                                                                                                                                                                                                                                                                                                                                                                                                                                                                                                                                                                                                                                                                                                                                                                                                                                                                                                                                                                                                                                                                                                                                                                                                                                                                                                                                                                                                                                                                                                                                                                                                                                                                                                                                                                                                                                                                                                                                                                                                                                                                                                                                                                                                                                                                                                                                                                                                                                                                                                                                                                                                                                                                                                                                                                                                                                                                                                                                                                                                                                                                                                                                                                                                                                                                                                                                                                                                                                                                                                                                                                                                                                                                                                                                                                                                                                                                                                                                                                                                                                                                                                                                                                                                                                                                                                                                                                                                                                                                                                                                                                                                                                                                                                                                                                                                                                                                                                                                                                                                                                                                                                                                                                                                                                                                                                                                                                                                                                                                                                                                                                                                                                                                                                                                                                                                                                                                                                                                                                                                                                                                                                                                                                                                                                                                                                                                                                                                                                                                                                                                                                                                                                                                                                                                                                                                                                                                                                                                                                                                                                                                                                                                                                                                                                                                                                                                                                                                                                                                                                                                                                                                                                                                                                                                                                                                                                                                                                                                                                                                                                                                                                                                                                                                                                                                                                                                                                                                                                                                                                                                                                                                                                                                                                                          | Department of Virology                                                                                                | Department of Virology                                                                                                |  |  |  | Aamer Ikram; Abdul Ahad; Hamza Ahmed Mirza; Massab Umair; Muhammad Ammar; Muhammad Salman; Nazish Badar; Syed Adnan Haider; Zaira Rehman                                                                                                                                                                                                                                                                        |
| EPI_ISL_9615095, EPI_ISL_9615096, EPI_ISL_9615099, EPI_ISL_9615101, EPI_ISL_9615108, EPI_ISL_9615109, EPI_ISL_9615111, EPI_ISL_9615112, EPI_ISL_9615116, EPI_ISL_9615117, EPI_ISL_9695824, EPI_ISL_9695827, EPI_ISL_9695828, EPI_ISL_9695829, EPI_ISL_9695830, EPI_ISL_9695831, EPI_ISL_9695854, EPI_ISL_9695856, EPI_ISL_9695859, EPI_ISL_9695864                                                                                                                                                                                                                                                                                                                                                                                                                                                                                                                                                                                                                                                                                                                                                                                                                                                                                                                                                                                                                                                                                                                                                                                                                                                                                                                                                                                                                                                                                                                                                                                                                                                                                                                                                                                                                                                                                                                                                                                                                                                                                                                                                                                                                                                                                                                                                                                                                                                                                                                                                                                                                                                                                                                                                                                                                                                                                                                                                                                                                                                                                                                                                                                                                                                                                                                                                                                                                                                                                                                                                                                                                                                                                                                                                                                                                                                                                                                                                                                                                                                                                                                                                                                                                                                                                                                                                                                                                                                                                                                                                                                                                                                                                                                                                                                                                                                                                                                                                                                                                                                                                                                                                                                                                                                                                                                                                                                                                                                                                                                                                                                                                                                                                                                                                                                                                                                                                                                                                                                                                                                                                                                                                                                                                                                                                                                                                                                                                                                                                                                                                                                                                                                                                                                                                                                                                                                                                                                                                                                                                                                                                                                                                                                                                                                                                                                                                                                                                                                                                                                                                                                                                                                                                                                                                                                                                                                                                                                                                                                                                                                                                                                                                                                                                                                                                                                                                                                                                                                                                                                                                                                                                                                                                                                                                                                                                                                                                                                                                                                                                                                                                                                                                                                                                                                                                                                                                                                                                                                                                                                                                                                                                                                                                                                                                                                                                                                                                                                                                                                                                                                                                                                                                                                                                                                                                                                                                                                                                                                                                                                                                                                                                                                                                                                                                                                                                                                                                                                                                                                                                                                                                                                                                                                                                                                                                                                                                                                                                                                                                                                                                                                                                                                                                                                                                                                                                                                                                                                                                                                                                                                                                                                                                                                                                                                                                                                                 | Dept. of Microbiology and Infection Control, Akershus University Hospital HF                                          | Dept. of Microbiology and Infection Control, Akershus University Hospital HF                                          |  |  |  | Alexander Hesselberg Løvestad; Hanne Berggreen; Hege Vangstein Aamot                                                                                                                                                                                                                                                                                                                                            |
| EPI_ISL_9712053, EPI_ISL_9712054, EPI_ISL_9712055, EPI_ISL_9712057, EPI_ISL_9712058, EPI_ISL_9712060, EPI_ISL_9712080                                                                                                                                                                                                                                                                                                                                                                                                                                                                                                                                                                                                                                                                                                                                                                                                                                                                                                                                                                                                                                                                                                                                                                                                                                                                                                                                                                                                                                                                                                                                                                                                                                                                                                                                                                                                                                                                                                                                                                                                                                                                                                                                                                                                                                                                                                                                                                                                                                                                                                                                                                                                                                                                                                                                                                                                                                                                                                                                                                                                                                                                                                                                                                                                                                                                                                                                                                                                                                                                                                                                                                                                                                                                                                                                                                                                                                                                                                                                                                                                                                                                                                                                                                                                                                                                                                                                                                                                                                                                                                                                                                                                                                                                                                                                                                                                                                                                                                                                                                                                                                                                                                                                                                                                                                                                                                                                                                                                                                                                                                                                                                                                                                                                                                                                                                                                                                                                                                                                                                                                                                                                                                                                                                                                                                                                                                                                                                                                                                                                                                                                                                                                                                                                                                                                                                                                                                                                                                                                                                                                                                                                                                                                                                                                                                                                                                                                                                                                                                                                                                                                                                                                                                                                                                                                                                                                                                                                                                                                                                                                                                                                                                                                                                                                                                                                                                                                                                                                                                                                                                                                                                                                                                                                                                                                                                                                                                                                                                                                                                                                                                                                                                                                                                                                                                                                                                                                                                                                                                                                                                                                                                                                                                                                                                                                                                                                                                                                                                                                                                                                                                                                                                                                                                                                                                                                                                                                                                                                                                                                                                                                                                                                                                                                                                                                                                                                                                                                                                                                                                                                                                                                                                                                                                                                                                                                                                                                                                                                                                                                                                                                                                                                                                                                                                                                                                                                                                                                                                                                                                                                                                                                                                                                                                                                                                                                                                                                                                                                                                                                                                                                                              |                                                                                                                       |                                                                                                                       |  |  |  |                                                                                                                                                                                                                                                                                                                                                                                                                 |
| see above                                                                                                                                                                                                                                                                                                                                                                                                                                                                                                                                                                                                                                                                                                                                                                                                                                                                                                                                                                                                                                                                                                                                                                                                                                                                                                                                                                                                                                                                                                                                                                                                                                                                                                                                                                                                                                                                                                                                                                                                                                                                                                                                                                                                                                                                                                                                                                                                                                                                                                                                                                                                                                                                                                                                                                                                                                                                                                                                                                                                                                                                                                                                                                                                                                                                                                                                                                                                                                                                                                                                                                                                                                                                                                                                                                                                                                                                                                                                                                                                                                                                                                                                                                                                                                                                                                                                                                                                                                                                                                                                                                                                                                                                                                                                                                                                                                                                                                                                                                                                                                                                                                                                                                                                                                                                                                                                                                                                                                                                                                                                                                                                                                                                                                                                                                                                                                                                                                                                                                                                                                                                                                                                                                                                                                                                                                                                                                                                                                                                                                                                                                                                                                                                                                                                                                                                                                                                                                                                                                                                                                                                                                                                                                                                                                                                                                                                                                                                                                                                                                                                                                                                                                                                                                                                                                                                                                                                                                                                                                                                                                                                                                                                                                                                                                                                                                                                                                                                                                                                                                                                                                                                                                                                                                                                                                                                                                                                                                                                                                                                                                                                                                                                                                                                                                                                                                                                                                                                                                                                                                                                                                                                                                                                                                                                                                                                                                                                                                                                                                                                                                                                                                                                                                                                                                                                                                                                                                                                                                                                                                                                                                                                                                                                                                                                                                                                                                                                                                                                                                                                                                                                                                                                                                                                                                                                                                                                                                                                                                                                                                                                                                                                                                                                                                                                                                                                                                                                                                                                                                                                                                                                                                                                                                                                                                                                                                                                                                                                                                                                                                                                                                                                                                                                          | Division of Medical Virology, National Health Laboratory Service (NHLS), Tygerberg Hospital / Stellenbosch University | Division of Medical Virology, National Health Laboratory Service (NHLS), Tygerberg Hospital / Stellenbosch University |  |  |  | Gert van Zyl; Mathilda Claassen; Shannon Wilson; Susan Engelbrecht; Tania Stander; Tongai Maponga; Wolfgang Preiser                                                                                                                                                                                                                                                                                             |
| EPI_ISL_9751644, EPI_ISL_9751689, EPI_ISL_9751691, EPI_ISL_9751691, EPI_ISL_9751715, EPI_ISL_9751754, EPI_ISL_9751772                                                                                                                                                                                                                                                                                                                                                                                                                                                                                                                                                                                                                                                                                                                                                                                                                                                                                                                                                                                                                                                                                                                                                                                                                                                                                                                                                                                                                                                                                                                                                                                                                                                                                                                                                                                                                                                                                                                                                                                                                                                                                                                                                                                                                                                                                                                                                                                                                                                                                                                                                                                                                                                                                                                                                                                                                                                                                                                                                                                                                                                                                                                                                                                                                                                                                                                                                                                                                                                                                                                                                                                                                                                                                                                                                                                                                                                                                                                                                                                                                                                                                                                                                                                                                                                                                                                                                                                                                                                                                                                                                                                                                                                                                                                                                                                                                                                                                                                                                                                                                                                                                                                                                                                                                                                                                                                                                                                                                                                                                                                                                                                                                                                                                                                                                                                                                                                                                                                                                                                                                                                                                                                                                                                                                                                                                                                                                                                                                                                                                                                                                                                                                                                                                                                                                                                                                                                                                                                                                                                                                                                                                                                                                                                                                                                                                                                                                                                                                                                                                                                                                                                                                                                                                                                                                                                                                                                                                                                                                                                                                                                                                                                                                                                                                                                                                                                                                                                                                                                                                                                                                                                                                                                                                                                                                                                                                                                                                                                                                                                                                                                                                                                                                                                                                                                                                                                                                                                                                                                                                                                                                                                                                                                                                                                                                                                                                                                                                                                                                                                                                                                                                                                                                                                                                                                                                                                                                                                                                                                                                                                                                                                                                                                                                                                                                                                                                                                                                                                                                                                                                                                                                                                                                                                                                                                                                                                                                                                                                                                                                                                                                                                                                                                                                                                                                                                                                                                                                                                                                                                                                                                                                                                                                                                                                                                                                                                                                                                                                                                                                                                                                              |                                                                                                                       |                                                                                                                       |  |  |  |                                                                                                                                                                                                                                                                                                                                                                                                                 |
| see above                                                                                                                                                                                                                                                                                                                                                                                                                                                                                                                                                                                                                                                                                                                                                                                                                                                                                                                                                                                                                                                                                                                                                                                                                                                                                                                                                                                                                                                                                                                                                                                                                                                                                                                                                                                                                                                                                                                                                                                                                                                                                                                                                                                                                                                                                                                                                                                                                                                                                                                                                                                                                                                                                                                                                                                                                                                                                                                                                                                                                                                                                                                                                                                                                                                                                                                                                                                                                                                                                                                                                                                                                                                                                                                                                                                                                                                                                                                                                                                                                                                                                                                                                                                                                                                                                                                                                                                                                                                                                                                                                                                                                                                                                                                                                                                                                                                                                                                                                                                                                                                                                                                                                                                                                                                                                                                                                                                                                                                                                                                                                                                                                                                                                                                                                                                                                                                                                                                                                                                                                                                                                                                                                                                                                                                                                                                                                                                                                                                                                                                                                                                                                                                                                                                                                                                                                                                                                                                                                                                                                                                                                                                                                                                                                                                                                                                                                                                                                                                                                                                                                                                                                                                                                                                                                                                                                                                                                                                                                                                                                                                                                                                                                                                                                                                                                                                                                                                                                                                                                                                                                                                                                                                                                                                                                                                                                                                                                                                                                                                                                                                                                                                                                                                                                                                                                                                                                                                                                                                                                                                                                                                                                                                                                                                                                                                                                                                                                                                                                                                                                                                                                                                                                                                                                                                                                                                                                                                                                                                                                                                                                                                                                                                                                                                                                                                                                                                                                                                                                                                                                                                                                                                                                                                                                                                                                                                                                                                                                                                                                                                                                                                                                                                                                                                                                                                                                                                                                                                                                                                                                                                                                                                                                                                                                                                                                                                                                                                                                                                                                                                                                                                                                                                                          | Dutch COVID-19 response team                                                                                          | Medical Microbiology, Maastricht University Medical Centre                                                            |  |  |  | Brian van der Veer*; Carmen Reumkens; Christian Hoebe; Erik Beuken; Jozef Dingemans*; Lieke van Alphen; Paul Savelkoul                                                                                                                                                                                                                                                                                          |
| EPI_ISL_9776364, EPI_ISL_9776663, EPI_ISL_9776713, EPI_ISL_9776719, EPI_ISL_9776775, EPI_ISL_9776776                                                                                                                                                                                                                                                                                                                                                                                                                                                                                                                                                                                                                                                                                                                                                                                                                                                                                                                                                                                                                                                                                                                                                                                                                                                                                                                                                                                                                                                                                                                                                                                                                                                                                                                                                                                                                                                                                                                                                                                                                                                                                                                                                                                                                                                                                                                                                                                                                                                                                                                                                                                                                                                                                                                                                                                                                                                                                                                                                                                                                                                                                                                                                                                                                                                                                                                                                                                                                                                                                                                                                                                                                                                                                                                                                                                                                                                                                                                                                                                                                                                                                                                                                                                                                                                                                                                                                                                                                                                                                                                                                                                                                                                                                                                                                                                                                                                                                                                                                                                                                                                                                                                                                                                                                                                                                                                                                                                                                                                                                                                                                                                                                                                                                                                                                                                                                                                                                                                                                                                                                                                                                                                                                                                                                                                                                                                                                                                                                                                                                                                                                                                                                                                                                                                                                                                                                                                                                                                                                                                                                                                                                                                                                                                                                                                                                                                                                                                                                                                                                                                                                                                                                                                                                                                                                                                                                                                                                                                                                                                                                                                                                                                                                                                                                                                                                                                                                                                                                                                                                                                                                                                                                                                                                                                                                                                                                                                                                                                                                                                                                                                                                                                                                                                                                                                                                                                                                                                                                                                                                                                                                                                                                                                                                                                                                                                                                                                                                                                                                                                                                                                                                                                                                                                                                                                                                                                                                                                                                                                                                                                                                                                                                                                                                                                                                                                                                                                                                                                                                                                                                                                                                                                                                                                                                                                                                                                                                                                                                                                                                                                                                                                                                                                                                                                                                                                                                                                                                                                                                                                                                                                                                                                                                                                                                                                                                                                                                                                                                                                                                                                                                                               | Dutch COVID-19 response team                                                                                          | National Institute for Public Health and the Environment (RIVM)                                                       |  |  |  | Adam Meijer; Afke Vogelzang; AnneMarie van den Brandt; Annelies Kroneman; Bas van der Veer; Chantal Reusken; Dennis Schmitz; Dirk Eggink; Florian Zwagemaker; Harry Venema; Ivo van Walle; Jeroen Cremer; Jill Kocken; Jordy de Bakker; Karim Hajji; Kim Freniks; Linda van Someren; Lisa Wijmsan; Lynn Aarts; Rynne Jaarsma; Sanne Bos; Sharon van den Brink; on behalf of the national COVID-19 response team |
| EPI_ISL_9572625, EPI_ISL_9572637, EPI_ISL_9572638                                                                                                                                                                                                                                                                                                                                                                                                                                                                                                                                                                                                                                                                                                                                                                                                                                                                                                                                                                                                                                                                                                                                                                                                                                                                                                                                                                                                                                                                                                                                                                                                                                                                                                                                                                                                                                                                                                                                                                                                                                                                                                                                                                                                                                                                                                                                                                                                                                                                                                                                                                                                                                                                                                                                                                                                                                                                                                                                                                                                                                                                                                                                                                                                                                                                                                                                                                                                                                                                                                                                                                                                                                                                                                                                                                                                                                                                                                                                                                                                                                                                                                                                                                                                                                                                                                                                                                                                                                                                                                                                                                                                                                                                                                                                                                                                                                                                                                                                                                                                                                                                                                                                                                                                                                                                                                                                                                                                                                                                                                                                                                                                                                                                                                                                                                                                                                                                                                                                                                                                                                                                                                                                                                                                                                                                                                                                                                                                                                                                                                                                                                                                                                                                                                                                                                                                                                                                                                                                                                                                                                                                                                                                                                                                                                                                                                                                                                                                                                                                                                                                                                                                                                                                                                                                                                                                                                                                                                                                                                                                                                                                                                                                                                                                                                                                                                                                                                                                                                                                                                                                                                                                                                                                                                                                                                                                                                                                                                                                                                                                                                                                                                                                                                                                                                                                                                                                                                                                                                                                                                                                                                                                                                                                                                                                                                                                                                                                                                                                                                                                                                                                                                                                                                                                                                                                                                                                                                                                                                                                                                                                                                                                                                                                                                                                                                                                                                                                                                                                                                                                                                                                                                                                                                                                                                                                                                                                                                                                                                                                                                                                                                                                                                                                                                                                                                                                                                                                                                                                                                                                                                                                                                                                                                                                                                                                                                                                                                                                                                                                                                                                                                                                                                  | Fondazione IRCCS Ca' Granda Ospedale Maggiore Policlinico                                                             | Fondazione IRCCS Ca' Granda Ospedale Maggiore Policlinico                                                             |  |  |  | Ferruccio Ceriotti; Sara Uceda Renteria                                                                                                                                                                                                                                                                                                                                                                         |
| EPI_ISL_9594324, EPI_ISL_9596593                                                                                                                                                                                                                                                                                                                                                                                                                                                                                                                                                                                                                                                                                                                                                                                                                                                                                                                                                                                                                                                                                                                                                                                                                                                                                                                                                                                                                                                                                                                                                                                                                                                                                                                                                                                                                                                                                                                                                                                                                                                                                                                                                                                                                                                                                                                                                                                                                                                                                                                                                                                                                                                                                                                                                                                                                                                                                                                                                                                                                                                                                                                                                                                                                                                                                                                                                                                                                                                                                                                                                                                                                                                                                                                                                                                                                                                                                                                                                                                                                                                                                                                                                                                                                                                                                                                                                                                                                                                                                                                                                                                                                                                                                                                                                                                                                                                                                                                                                                                                                                                                                                                                                                                                                                                                                                                                                                                                                                                                                                                                                                                                                                                                                                                                                                                                                                                                                                                                                                                                                                                                                                                                                                                                                                                                                                                                                                                                                                                                                                                                                                                                                                                                                                                                                                                                                                                                                                                                                                                                                                                                                                                                                                                                                                                                                                                                                                                                                                                                                                                                                                                                                                                                                                                                                                                                                                                                                                                                                                                                                                                                                                                                                                                                                                                                                                                                                                                                                                                                                                                                                                                                                                                                                                                                                                                                                                                                                                                                                                                                                                                                                                                                                                                                                                                                                                                                                                                                                                                                                                                                                                                                                                                                                                                                                                                                                                                                                                                                                                                                                                                                                                                                                                                                                                                                                                                                                                                                                                                                                                                                                                                                                                                                                                                                                                                                                                                                                                                                                                                                                                                                                                                                                                                                                                                                                                                                                                                                                                                                                                                                                                                                                                                                                                                                                                                                                                                                                                                                                                                                                                                                                                                                                                                                                                                                                                                                                                                                                                                                                                                                                                                                                                                   | GENZANO                                                                                                               | University Campus Bio-Medico of Rome (UCBM)                                                                           |  |  |  | Angeletti S.; De Florio L.; Fogolari M.; Francesconi M.; Lintas C.; Riva E.; Veralli R.                                                                                                                                                                                                                                                                                                                         |
| EPI_ISL_9533379, EPI_ISL_9675015, EPI_ISL_9675016, EPI_ISL_9675017, EPI_ISL_9675018, EPI_ISL_9675019, EPI_ISL_9675022, EPI_ISL_9675023, EPI_ISL_9675024, EPI_ISL_9675025, EPI_ISL_9675027, EPI_ISL_9675028, EPI_ISL_9675031, EPI_ISL_9675032, EPI_ISL_9675033, EPI_ISL_9675034, EPI_ISL_9675035, EPI_ISL_9675038, EPI_ISL_9675039, EPI_ISL_9675040, EPI_ISL_9675041, EPI_ISL_9675042, EPI_ISL_9675043, EPI_ISL_9675044, EPI_ISL_9675045, EPI_ISL_9675046, EPI_ISL_9675047, EPI_ISL_9675048, EPI_ISL_9675049, EPI_ISL_9675050, EPI_ISL_9675051, EPI_ISL_9675052, EPI_ISL_9675053, EPI_ISL_9675054, EPI_ISL_9675055, EPI_ISL_9675056, EPI_ISL_9675057, EPI_ISL_9675058, EPI_ISL_9675059, EPI_ISL_9675060, EPI_ISL_9675061, EPI_ISL_9675062, EPI_ISL_9675063, EPI_ISL_9675064, EPI_ISL_9675065, EPI_ISL_9675066, EPI_ISL_9675067, EPI_ISL_9675068, EPI_ISL_9675069, EPI_ISL_9675070, EPI_ISL_9675071, EPI_ISL_9675072, EPI_ISL_9675073, EPI_ISL_9675074, EPI_ISL_9675075, EPI_ISL_9675076, EPI_ISL_9675077, EPI_ISL_9675078, EPI_ISL_9675079, EPI_ISL_9675080, EPI_ISL_9675081, EPI_ISL_9675082, EPI_ISL_9675083, EPI_ISL_9675084, EPI_ISL_9675085, EPI_ISL_9675086, EPI_ISL_9675087, EPI_ISL_9675088, EPI_ISL_9675089, EPI_ISL_9675090, EPI_ISL_9675091, EPI_ISL_9675092, EPI_ISL_9675093, EPI_ISL_9675094, EPI_ISL_9675095, EPI_ISL_9675096, EPI_ISL_9675097, EPI_ISL_9675098, EPI_ISL_9675099, EPI_ISL_9675100, EPI_ISL_9675101, EPI_ISL_9675102, EPI_ISL_9675103, EPI_ISL_9675104, EPI_ISL_9675105, EPI_ISL_9675106, EPI_ISL_9675107, EPI_ISL_9675108, EPI_ISL_9675109, EPI_ISL_9675110, EPI_ISL_9675111, EPI_ISL_9675112, EPI_ISL_9675113, EPI_ISL_9675114, EPI_ISL_9675115, EPI_ISL_9675116, EPI_ISL_9675117, EPI_ISL_9675118, EPI_ISL_9675119, EPI_ISL_9675120, EPI_ISL_9675121, EPI_ISL_9675122, EPI_ISL_9675123, EPI_ISL_9675124, EPI_ISL_9675125, EPI_ISL_9675126, EPI_ISL_9675127, EPI_ISL_9675128, EPI_ISL_9675129, EPI_ISL_9675130, EPI_ISL_9675131, EPI_ISL_9675132, EPI_ISL_9675133, EPI_ISL_9675134, EPI_ISL_9675135, EPI_ISL_9675136, EPI_ISL_9675137, EPI_ISL_9675138, EPI_ISL_9675139, EPI_ISL_9675140, EPI_ISL_9675141, EPI_ISL_9675142, EPI_ISL_9675143, EPI_ISL_9675144, EPI_ISL_9675145, EPI_ISL_9675146, EPI_ISL_9675147, EPI_ISL_9675148, EPI_ISL_9675149, EPI_ISL_9675150, EPI_ISL_9675151, EPI_ISL_9675152, EPI_ISL_9675153, EPI_ISL_9675154, EPI_ISL_9675155, EPI_ISL_9675156, EPI_ISL_9675157, EPI_ISL_9675158, EPI_ISL_9675159, EPI_ISL_9675160, EPI_ISL_9675161, EPI_ISL_9675162, EPI_ISL_9675163, EPI_ISL_9675164, EPI_ISL_9675165, EPI_ISL_9675166, EPI_ISL_9675167, EPI_ISL_9675168, EPI_ISL_9675169, EPI_ISL_9675170, EPI_ISL_9675171, EPI_ISL_9675172, EPI_ISL_9675173, EPI_ISL_9675174, EPI_ISL_9675175, EPI_ISL_9675176, EPI_ISL_9675177, EPI_ISL_9675178, EPI_ISL_9675179, EPI_ISL_9675180, EPI_ISL_9675181, EPI_ISL_9675182, EPI_ISL_9675183, EPI_ISL_9675184, EPI_ISL_9675185, EPI_ISL_9675186, EPI_ISL_9675187, EPI_ISL_9675188, EPI_ISL_9675189, EPI_ISL_9675190, EPI_ISL_9675191, EPI_ISL_9675192, EPI_ISL_9675193, EPI_ISL_9675194, EPI_ISL_9675195, EPI_ISL_9675196, EPI_ISL_9675197, EPI_ISL_9675198, EPI_ISL_9675199, EPI_ISL_9675200, EPI_ISL_9675201, EPI_ISL_9675202, EPI_ISL_9675203, EPI_ISL_9675204, EPI_ISL_9675205, EPI_ISL_9675206, EPI_ISL_9675207, EPI_ISL_9675208, EPI_ISL_9675209, EPI_ISL_9675210, EPI_ISL_9675211, EPI_ISL_9675212, EPI_ISL_9675213, EPI_ISL_9675214, EPI_ISL_9675215, EPI_ISL_9675216, EPI_ISL_9675217, EPI_ISL_9675218, EPI_ISL_9675219, EPI_ISL_9675220, EPI_ISL_9675221, EPI_ISL_9675222, EPI_ISL_9675223, EPI_ISL_9675224, EPI_ISL_9675225, EPI_ISL_9675226, EPI_ISL_9675227, EPI_ISL_9675228, EPI_ISL_9675229, EPI_ISL_9675230, EPI_ISL_9675231, EPI_ISL_9675232, EPI_ISL_9675233, EPI_ISL_9675234, EPI_ISL_9675235, EPI_ISL_9675236, EPI_ISL_9675237, EPI_ISL_9675238, EPI_ISL_9675239, EPI_ISL_9675240, EPI_ISL_9675241, EPI_ISL_9675242, EPI_ISL_9675243, EPI_ISL_9675244, EPI_ISL_9675245, EPI_ISL_9675246, EPI_ISL_9675247, EPI_ISL_9675248, EPI_ISL_9675249, EPI_ISL_9675250, EPI_ISL_9675251, EPI_ISL_9675252, EPI_ISL_9675253, EPI_ISL_9675254, EPI_ISL_9675255, EPI_ISL_9675256, EPI_ISL_9675257, EPI_ISL_9675258, EPI_ISL_9675259, EPI_ISL_9675260, EPI_ISL_9675261, EPI_ISL_9675262, EPI_ISL_9675263, EPI_ISL_9675264, EPI_ISL_9675265, EPI_ISL_9675266, EPI_ISL_9675267, EPI_ISL_9675268, EPI_ISL_9675269, EPI_ISL_9675270, EPI_ISL_9675271, EPI_ISL_9675272, EPI_ISL_9675273, EPI_ISL_9675274, EPI_ISL_9675275, EPI_ISL_9675276, EPI_ISL_9675277, EPI_ISL_9675278, EPI_ISL_9675279, EPI_ISL_9675280, EPI_ISL_9675281, EPI_ISL_9675282, EPI_ISL_9675283, EPI_ISL_9675284, EPI_ISL_9675285, EPI_ISL_9675286, EPI_ISL_9675287, EPI_ISL_9675288, EPI_ISL_9675289, EPI_ISL_9675290, EPI_ISL_9675291, EPI_ISL_9675292, EPI_ISL_9675293, EPI_ISL_9675294, EPI_ISL_9675295, EPI_ISL_9675296, EPI_ISL_9675297, EPI_ISL_9675298, EPI_ISL_9675299, EPI_ISL_9675300, EPI_ISL_9675301, EPI_ISL_9675302, EPI_ISL_9675303, EPI_ISL_9675304, EPI_ISL_9675305, EPI_ISL_9675306, EPI_ISL_9675307, EPI_ISL_9675308, EPI_ISL_9675309, EPI_ISL_9675310, EPI_ISL_9675311, EPI_ISL_9675312, EPI_ISL_9675313, EPI_ISL_9675314, EPI_ISL_9675315, EPI_ISL_9675316, EPI_ISL_9675317, EPI_ISL_9675318, EPI_ISL_9675319, EPI_ISL_9675320, EPI_ISL_9675321, EPI_ISL_9675322, EPI_ISL_9675323, EPI_ISL_9675324, EPI_ISL_9675325, EPI_ISL_9675326, EPI_ISL_9675327, EPI_ISL_9675328, EPI_ISL_9675329, EPI_ISL_9675330, EPI_ISL_9675331, EPI_ISL_9675332, EPI_ISL_9675333, EPI_ISL_9675334, EPI_ISL_9675335, EPI_ISL_9675336, EPI_ISL_9675337, EPI_ISL_9675338, EPI_ISL_9675339, EPI_ISL_9675340, EPI_ISL_9675341, EPI_ISL_9675342, EPI_ISL_9675343, EPI_ISL_9675344, EPI_ISL_9675345, EPI_ISL_9675346, EPI_ISL_9675347, EPI_ISL_9675348, EPI_ISL_9675349, EPI_ISL_9675350, EPI_ISL_9675351, EPI_ISL_9675352, EPI_ISL_9675353, EPI_ISL_9675354, EPI_ISL_9675355, EPI_ISL_9675356, EPI_ISL_9675357, EPI_ISL_9675358, EPI_ISL_9675359, EPI_ISL_9675360, EPI_ISL_9675361, EPI_ISL_9675362, EPI_ISL_9675363, EPI_ISL_9675364, EPI_ISL_9675365, EPI_ISL_9675366, EPI_ISL_9675367, EPI_ISL_9675368, EPI_ISL_9675369, EPI_ISL_9675370, EPI_ISL_9675371, EPI_ISL_9675372, EPI_ISL_9675373, EPI_ISL_9675374, EPI_ISL_9675375, EPI_ISL_9675376, EPI_ISL_9675377, EPI_ISL_9675378, EPI_ISL_9675379, EPI_ISL_9675380, EPI_ISL_9675381, EPI_ISL_9675382, EPI_ISL_9675383, EPI_ISL_9675384, EPI_ISL_9675385, EPI_ISL_9675386, EPI_ISL_9675387, EPI_ISL_9675388, EPI_ISL_9675389, EPI_ISL_9675390, EPI_ISL_9675391, EPI_ISL_9675392, EPI_ISL_9675393, EPI_ISL_9675394, EPI_ISL_9675395, EPI_ISL_9675396, EPI_ISL_9675397, EPI_ISL_9675398, EPI_ISL_9675399, EPI_ISL_9675400, EPI_ISL_9675401, EPI_ISL_9675402, EPI_ISL_9675403, EPI_ISL_9675404, EPI_ISL_9675405, EPI_ISL_9675406, EPI_ISL_9675407, EPI_ISL_9675408, EPI_ISL_9675409, EPI_ISL_9675410, EPI_ISL_9675411, EPI_ISL_9675412, EPI_ISL_9675413, EPI_ISL_9675414, EPI_ISL_9675415, EPI_ISL_9675416, EPI_ISL_9675417, EPI_ISL_9675418, EPI_ISL_9675419, EPI_ISL_9675420, EPI_ISL_9675421, EPI_ISL_9675422, EPI_ISL_9675423, EPI_ISL_9675424, EPI_ISL_9675425, EPI_ISL_9675426, EPI_ISL_9675427, EPI_ISL_9675428, EPI_ISL_9675429, EPI_ISL_9675430, EPI_ISL_9675431, EPI_ISL_9675432, EPI_ISL_9675433, EPI_ISL_9675434, EPI_ISL_9675435, EPI_ISL_9675436, EPI_ISL_9675437, EPI_ISL_9675438, EPI_ISL_9675439, EPI_ISL_9675440, EPI_ISL_9675441, EPI_ISL_9675442, EPI_ISL_9675443, EPI_ISL_9675444, EPI_ISL_9675445, EPI_ISL_9675446, EPI_ISL_9675447, EPI_ISL_9675448, EPI_ISL_9675449, EPI_ISL_9675450, EPI_ISL_9675451, EPI_ISL_9675452, EPI_ISL_9675453, EPI_ISL_9675454, EPI_ISL_9675455, EPI_ISL_9675456, EPI_ISL_9675457, EPI_ISL_9675458, EPI_ISL_9675459, EPI_ISL_9675460, EPI_ISL_9675461, EPI_ISL_9675462, EPI_ISL_9675463, EPI_ISL_9675464, EPI_ISL_9675465, EPI_ISL_9675466, EPI_ISL_9675467, EPI_ISL_9675468, EPI_ISL_9675469, EPI_ISL_9675470, EPI_ISL_9675471, EPI_ISL_9675472, EPI_ISL_9675473, EPI_ISL_9675474, EPI_ISL_9675475, EPI_ISL_9675476, EPI_ISL_9675477, EPI_ISL_9675478, EPI_ISL_9675479, EPI_ISL_9675480, EPI_ISL_9675481, EPI_ISL_9675482, EPI_ISL_9675483, EPI_ISL_9675484, EPI_ISL_9675485, EPI_ISL_9675486, EPI_ISL_9675487, EPI_ISL_9675488, EPI_ISL_9675489, EPI_ISL_9675490, EPI_ISL_9675491, EPI_ISL_9675492, EPI_ISL_9675493, EPI_ISL_9675494, EPI_ISL_9675495, EPI_ISL_9675496, EPI_ISL_9675497, EPI_ISL_9675498, EPI_ISL_9675499, EPI_ISL_9675500, EPI_ISL_9675501, EPI_ISL_9675502, EPI_ISL_9675503, EPI_ISL_9675504, EPI_ISL_9675505, EPI_ISL_9675506, EPI_ISL_9675507, EPI_ISL_9675508, EPI_ISL_9675509, EPI_ISL_9675510, EPI_ISL_9675511, EPI_ISL_9675512, EPI_ISL_9675513, EPI_ISL_9675514, EPI_ISL_9675515, EPI_ISL_9675516, EPI_ISL_9675517, EPI_ISL_9675518, EPI_ISL_9675519, EPI_ISL_9675520, EPI_ISL_9675521, EPI_ISL_9675522, EPI_ISL_9675523, EPI_ISL_9675524, EPI_ISL_9675525, EPI_ISL_9675526, EPI_ISL_9675527, EPI_ISL_9675528, EPI_ISL_9675529, EPI_ISL_9675530, EPI_ISL_9675531, EPI_ISL_9675532, EPI_ISL_9675533, EPI_ISL_9675534, EPI_ISL_9675535, EPI_ISL_9675536, EPI_ISL_9675537, EPI_ISL_9675538, EPI_ISL_9675539, EPI_ISL_9675540, EPI_ISL_9675541, EPI_ISL_9675542, EPI_ISL_9675543, EPI_ISL_9675544, EPI_ISL_9675545, EPI_ISL_9675546, EPI_ISL_9675547, EPI_ISL_9675548, EPI_ISL_9675549, EPI_ISL_9675550, EPI_ISL_9675551, EPI_ISL_9675552, EPI_ISL_9675553, EPI_ISL_9675554, EPI_ISL_9675555, EPI_ISL_9675556, EPI_ISL_9675557, EPI_ISL_9675558, EPI_ISL_9675559, EPI_ISL_9675560, EPI_ISL_9675561, EPI_ISL_9675562, EPI_ISL_9675563, EPI_ISL_9675564, EPI_ISL_9675565, EPI_ISL_9675566, EPI_ISL_9675567, EPI_ISL_9675568, EPI_ISL_9675569, EPI_ISL_9675570, EPI_ISL_9675571, EPI_ISL_9675572, EPI_ISL_9675573, EPI_ISL_9675574, EPI_ISL_9675575, EPI_ISL_9675576, EPI_ISL_9675577, EPI_ISL_9675578, EPI_ISL_9675579, EPI_ISL_9675580, EPI_ISL_9675581, EPI_ISL_9675582, EPI_ISL_9675583, EPI_ISL_9675584, EPI_ISL_9675585, EPI_ISL_9675586, EPI_ISL_9675587, EPI_ISL_9675588, EPI_ISL_9675589, EPI_ISL_9675590, EPI_ISL_9675591, EPI_ISL_9675592, EPI_ISL_9675593, EPI_ISL_9675594, EPI_ISL_9675595, EPI_ISL_9675596, EPI_ISL_9675597, EPI_ISL_9675598, EPI_ISL_9675599, EPI_ISL_9675600, EPI_ISL_9675601, EPI_ISL_9675602, EPI_ISL_9675603, EPI_ISL_9675604, EPI_ISL_9675605, EPI_ISL_9675606, EPI_ISL_9675607, EPI_ISL_9675608, EPI_ISL_9675609, EPI_ISL_9675610, EPI_ISL_9675611, EPI_ISL_9675612, EPI_ISL_9675613, EPI_ISL_9675614, EPI_ISL_9675615, EPI_ISL_9675616, EPI_ISL_9675617, EPI_ISL_9675618, EPI_ISL_9675619, EPI_ISL_9675620, EPI_ISL_9675621, EPI_ISL_9675622, EPI_ISL_9675623, EPI_ISL_9675624, EPI_ISL_9675625, EPI_ISL_9675626, EPI_ISL_9675627, EPI_ISL_9675628, EPI_ISL_9675629, EPI_ISL_9675630, EPI_ISL_9675631, EPI_ISL_9675632, EPI_ISL_9675633, EPI_ISL_9675634, EPI_ISL_9675635, EPI_ISL_9675636, EPI_ISL_9675637, EPI_ISL_9675638, EPI_ISL_9675639, EPI_ISL_9675640, EPI_ISL_9675641, EPI_ISL_9675642, EPI_ISL_9675643, EPI_ISL_9675644, EPI_ISL_9675645, EPI_ISL_9675646, EPI_ISL_9675647, EPI_ISL_9675648, EPI_ISL_9675649, EPI_ISL_9675650, EPI_ISL_9675651, EPI_ISL_9675652, EPI_ISL_9675653, EPI_ISL_9675654, EPI_ISL_9675655, EPI_ISL_9675656, EPI_ISL_9675657, EPI_ISL_9675658, EPI_ISL_9675659, EPI_ISL_9675660, EPI_ISL_9675661, EPI_ISL_9675662, EPI_ISL_9675663, EPI_ISL_9675664, EPI_ISL_9675665, EPI_ISL_9675666, EPI_ISL_9675667, EPI_ISL_9675668, EPI_ISL_9675669, EPI_ISL_9675670, EPI_ISL_9675671, EPI_ISL_9675672, EPI_ISL_9675673, EPI_ISL_9675674, EPI_ISL_9675675, EPI_ISL_9675676, EPI_ISL_9675677, EPI_ISL_9675678, EPI_ISL_9675679, EPI_ISL_9675680, EPI_ISL_9675681, EPI_ISL_9675682, EPI_ISL_9675683, EPI_ISL_9675684, EPI_ISL_9675685, EPI_ISL_9675686, EPI_ISL_9675687, EPI_ISL_9675688, EPI_ISL_9675689, EPI_ISL_9675690, EPI_ISL_9675691, EPI_ISL_9675692, EPI_ISL_9675693, EPI_ISL_9675694, EPI_ISL_9675695, EPI_ISL_9675696, EPI_ISL_9675697, EPI_ISL_9675698, EPI_ISL_9675699, EPI_ISL_9675700, EPI_ISL_9675701, EPI_ISL_9675702, EPI_ISL_9675703, EPI_ISL_9675704, EPI_ISL_9675705, EPI_ISL_9675706, EPI_ISL_9675707, EPI_ISL_9675708, EPI_ISL_9675709, EPI_ISL_9675710, EPI_ISL_9675711, EPI_ISL_9675712, EPI_ISL_9675713, EPI_ISL_9675714, EPI_ISL_9675715, EPI_ISL_9675716, EPI_ISL_9675717, EPI_ISL_9675718, EPI_ISL_9675719, EPI_ISL_9675720, EPI_ISL_9675721, EPI_ISL_9675722, EPI_ISL_9675723, EPI_ISL_9675724, EPI_ISL_9675725, EPI_ISL_9675726, EPI_ISL_9675727, EPI_ISL_9675728, EPI_ISL_9675729, EPI_ISL_9675730, EPI_ISL_9675731, EPI_ISL_9675732, EPI_ISL_9675733, EPI_ISL_9675734, EPI_ISL_9675735, EPI_ISL_9675736, EPI_IS |                                                                                                                       |                                                                                                                       |  |  |  |                                                                                                                                                                                                                                                                                                                                                                                                                 |

|                                                                                                                                                                                                                                                                                                                                                                                                                                                                                                                                                                                                                                                                                                                                                                                                                                                                                                                                                                                                                                                                                                                                                                                                                                                                                                                                                                                                                                                                                                                                                                                                                                                                                                                                                                                                                                                                                                                                                                                                                                                                                                                                                                                                                                                                                                                                                                                                                                                                                                                                                                                                                                                                                                                                                                                                                                                                                                                                                                                                                                                                                                                                                                                                                                                                                                                                                                                                                                                                                                                                                                                                                                                                                                                                                                                                                                                                                                                                                                                                                                                                                                                                                                                                                                                                                                                                                                                                                                                                                                                                                                                                                                                                                                                                                                                                                                                                                                                                                                                                                                                                                                                                                                                                                                                                                                                                                                                                                                                                                                                                                                                                                                                                                                                                                                                                                                                                                                                                                                                                                                                                                                                                                                                                                                                                                                                                                                                                                                                                                                                                                                                                                                                                                                                                                                                                                                                                                                                                                                                                                                                                                                                                                                                                                                                                                                                                                                                                                                                                                                                                                                                                                                                                                                                                                                                                                                                                                                                                                                                                                                                                                                                                                                                                                                                                                                                                                                                                                                                                                                                                                                                                                                                                                                                                                                                                                                                                                                                                                                                                                                                                                                                                                                                                                                                                                                                                                                                                                                                                                                                                                                                                                                                                                                                                                                                                                                                                                                                                                                                                                                                                                                                                                                                                                                                                                                                                                                                                                                                                                                                                                                                                                                                                                                                                                                                                                                                                                                                                                                                                                                                                                                                                                                                                                                                                                                                                                                                                                                                                                                                                                                                                                                                                                                                                                                                                                                                                                                                                                                                                                                                                                                                                                                                                                                                                                                                                                                                                                                                                                                                                                                                                                                                                                                                                                                                                                                                                                                                                                                                                                                                                                                                                                                                                                                                            |                                                                                  |                                                                                                     |                                                                                                                                                                                                                                              |
|------------------------------------------------------------------------------------------------------------------------------------------------------------------------------------------------------------------------------------------------------------------------------------------------------------------------------------------------------------------------------------------------------------------------------------------------------------------------------------------------------------------------------------------------------------------------------------------------------------------------------------------------------------------------------------------------------------------------------------------------------------------------------------------------------------------------------------------------------------------------------------------------------------------------------------------------------------------------------------------------------------------------------------------------------------------------------------------------------------------------------------------------------------------------------------------------------------------------------------------------------------------------------------------------------------------------------------------------------------------------------------------------------------------------------------------------------------------------------------------------------------------------------------------------------------------------------------------------------------------------------------------------------------------------------------------------------------------------------------------------------------------------------------------------------------------------------------------------------------------------------------------------------------------------------------------------------------------------------------------------------------------------------------------------------------------------------------------------------------------------------------------------------------------------------------------------------------------------------------------------------------------------------------------------------------------------------------------------------------------------------------------------------------------------------------------------------------------------------------------------------------------------------------------------------------------------------------------------------------------------------------------------------------------------------------------------------------------------------------------------------------------------------------------------------------------------------------------------------------------------------------------------------------------------------------------------------------------------------------------------------------------------------------------------------------------------------------------------------------------------------------------------------------------------------------------------------------------------------------------------------------------------------------------------------------------------------------------------------------------------------------------------------------------------------------------------------------------------------------------------------------------------------------------------------------------------------------------------------------------------------------------------------------------------------------------------------------------------------------------------------------------------------------------------------------------------------------------------------------------------------------------------------------------------------------------------------------------------------------------------------------------------------------------------------------------------------------------------------------------------------------------------------------------------------------------------------------------------------------------------------------------------------------------------------------------------------------------------------------------------------------------------------------------------------------------------------------------------------------------------------------------------------------------------------------------------------------------------------------------------------------------------------------------------------------------------------------------------------------------------------------------------------------------------------------------------------------------------------------------------------------------------------------------------------------------------------------------------------------------------------------------------------------------------------------------------------------------------------------------------------------------------------------------------------------------------------------------------------------------------------------------------------------------------------------------------------------------------------------------------------------------------------------------------------------------------------------------------------------------------------------------------------------------------------------------------------------------------------------------------------------------------------------------------------------------------------------------------------------------------------------------------------------------------------------------------------------------------------------------------------------------------------------------------------------------------------------------------------------------------------------------------------------------------------------------------------------------------------------------------------------------------------------------------------------------------------------------------------------------------------------------------------------------------------------------------------------------------------------------------------------------------------------------------------------------------------------------------------------------------------------------------------------------------------------------------------------------------------------------------------------------------------------------------------------------------------------------------------------------------------------------------------------------------------------------------------------------------------------------------------------------------------------------------------------------------------------------------------------------------------------------------------------------------------------------------------------------------------------------------------------------------------------------------------------------------------------------------------------------------------------------------------------------------------------------------------------------------------------------------------------------------------------------------------------------------------------------------------------------------------------------------------------------------------------------------------------------------------------------------------------------------------------------------------------------------------------------------------------------------------------------------------------------------------------------------------------------------------------------------------------------------------------------------------------------------------------------------------------------------------------------------------------------------------------------------------------------------------------------------------------------------------------------------------------------------------------------------------------------------------------------------------------------------------------------------------------------------------------------------------------------------------------------------------------------------------------------------------------------------------------------------------------------------------------------------------------------------------------------------------------------------------------------------------------------------------------------------------------------------------------------------------------------------------------------------------------------------------------------------------------------------------------------------------------------------------------------------------------------------------------------------------------------------------------------------------------------------------------------------------------------------------------------------------------------------------------------------------------------------------------------------------------------------------------------------------------------------------------------------------------------------------------------------------------------------------------------------------------------------------------------------------------------------------------------------------------------------------------------------------------------------------------------------------------------------------------------------------------------------------------------------------------------------------------------------------------------------------------------------------------------------------------------------------------------------------------------------------------------------------------------------------------------------------------------------------------------------------------------------------------------------------------------------------------------------------------------------------------------------------------------------------------------------------------------------------------------------------------------------------------------------------------------------------------------------------------------------------------------------------------------------------------------------------------------------------------------------------------------------------------------------------------------------------------------------------------------------------------------------------------------------------------------------------------------------------------------------------------------------------------------------------------------------------------------------------------------------------------------------------------------------------------------------------------------------------------------------------------------------------------------------------------------------------------------------------------------------------------------------------------------------------------------------------------------------------------------------------------------------------------------------------------------------------------------------------------------------------------------------------------------------------------------------------------------------------------------------------------------------------------------------------------------------------------------------------------------------------------------------------------------------------------------------------------------------------------------------------------------------------------------------------------------------------------------------------------------------------------------------------------------------------------------------------------------------------------------------------------------------------------------------------------------------------------------------------------------------------------------------------------------------------------------------------------------------------------------------------------------------------------------------------------------------------------------------------------------------------------------------------------------------------------------------------------------------------------------------------------------------------------------------------------------------------------------------------------------------------------------------------------------------------------------------------------------------------------------------------------------------------------------------------------------------------------------------------------------------------------------------------------------------------------------------------------------------------------------------------------------------------------------------------------------------------------------------------------------------------------------------------------|----------------------------------------------------------------------------------|-----------------------------------------------------------------------------------------------------|----------------------------------------------------------------------------------------------------------------------------------------------------------------------------------------------------------------------------------------------|
| EPI_ISL_9695986                                                                                                                                                                                                                                                                                                                                                                                                                                                                                                                                                                                                                                                                                                                                                                                                                                                                                                                                                                                                                                                                                                                                                                                                                                                                                                                                                                                                                                                                                                                                                                                                                                                                                                                                                                                                                                                                                                                                                                                                                                                                                                                                                                                                                                                                                                                                                                                                                                                                                                                                                                                                                                                                                                                                                                                                                                                                                                                                                                                                                                                                                                                                                                                                                                                                                                                                                                                                                                                                                                                                                                                                                                                                                                                                                                                                                                                                                                                                                                                                                                                                                                                                                                                                                                                                                                                                                                                                                                                                                                                                                                                                                                                                                                                                                                                                                                                                                                                                                                                                                                                                                                                                                                                                                                                                                                                                                                                                                                                                                                                                                                                                                                                                                                                                                                                                                                                                                                                                                                                                                                                                                                                                                                                                                                                                                                                                                                                                                                                                                                                                                                                                                                                                                                                                                                                                                                                                                                                                                                                                                                                                                                                                                                                                                                                                                                                                                                                                                                                                                                                                                                                                                                                                                                                                                                                                                                                                                                                                                                                                                                                                                                                                                                                                                                                                                                                                                                                                                                                                                                                                                                                                                                                                                                                                                                                                                                                                                                                                                                                                                                                                                                                                                                                                                                                                                                                                                                                                                                                                                                                                                                                                                                                                                                                                                                                                                                                                                                                                                                                                                                                                                                                                                                                                                                                                                                                                                                                                                                                                                                                                                                                                                                                                                                                                                                                                                                                                                                                                                                                                                                                                                                                                                                                                                                                                                                                                                                                                                                                                                                                                                                                                                                                                                                                                                                                                                                                                                                                                                                                                                                                                                                                                                                                                                                                                                                                                                                                                                                                                                                                                                                                                                                                                                                                                                                                                                                                                                                                                                                                                                                                                                                                                                                                                                                            | Labo Klinische Biologie, UZA                                                     | Labo Klinische Biologie, UZA                                                                        | Basil Britto Xavier; Christine Lammens; Herman Goossens; Ines Verbesselt; Jasmine Coppens; Kathleen Holemans; Marie Le Mercier; Veerle Matheusssen                                                                                           |
| EPI_ISL_9665211                                                                                                                                                                                                                                                                                                                                                                                                                                                                                                                                                                                                                                                                                                                                                                                                                                                                                                                                                                                                                                                                                                                                                                                                                                                                                                                                                                                                                                                                                                                                                                                                                                                                                                                                                                                                                                                                                                                                                                                                                                                                                                                                                                                                                                                                                                                                                                                                                                                                                                                                                                                                                                                                                                                                                                                                                                                                                                                                                                                                                                                                                                                                                                                                                                                                                                                                                                                                                                                                                                                                                                                                                                                                                                                                                                                                                                                                                                                                                                                                                                                                                                                                                                                                                                                                                                                                                                                                                                                                                                                                                                                                                                                                                                                                                                                                                                                                                                                                                                                                                                                                                                                                                                                                                                                                                                                                                                                                                                                                                                                                                                                                                                                                                                                                                                                                                                                                                                                                                                                                                                                                                                                                                                                                                                                                                                                                                                                                                                                                                                                                                                                                                                                                                                                                                                                                                                                                                                                                                                                                                                                                                                                                                                                                                                                                                                                                                                                                                                                                                                                                                                                                                                                                                                                                                                                                                                                                                                                                                                                                                                                                                                                                                                                                                                                                                                                                                                                                                                                                                                                                                                                                                                                                                                                                                                                                                                                                                                                                                                                                                                                                                                                                                                                                                                                                                                                                                                                                                                                                                                                                                                                                                                                                                                                                                                                                                                                                                                                                                                                                                                                                                                                                                                                                                                                                                                                                                                                                                                                                                                                                                                                                                                                                                                                                                                                                                                                                                                                                                                                                                                                                                                                                                                                                                                                                                                                                                                                                                                                                                                                                                                                                                                                                                                                                                                                                                                                                                                                                                                                                                                                                                                                                                                                                                                                                                                                                                                                                                                                                                                                                                                                                                                                                                                                                                                                                                                                                                                                                                                                                                                                                                                                                                                                                                                            | Labor Berlin Charité Vivantes GmbH / Institut für Virologie                      | Charité Universitätsmedizin Berlin, Institut für Virologie/Labor Berlin                             | Barbara Mühlemann; Christian Drosten; Christine Stephan; Peter Menzel; Rolf Schwarzer; Terry Jones; Victor M Corman                                                                                                                          |
| EPI_ISL_9726569                                                                                                                                                                                                                                                                                                                                                                                                                                                                                                                                                                                                                                                                                                                                                                                                                                                                                                                                                                                                                                                                                                                                                                                                                                                                                                                                                                                                                                                                                                                                                                                                                                                                                                                                                                                                                                                                                                                                                                                                                                                                                                                                                                                                                                                                                                                                                                                                                                                                                                                                                                                                                                                                                                                                                                                                                                                                                                                                                                                                                                                                                                                                                                                                                                                                                                                                                                                                                                                                                                                                                                                                                                                                                                                                                                                                                                                                                                                                                                                                                                                                                                                                                                                                                                                                                                                                                                                                                                                                                                                                                                                                                                                                                                                                                                                                                                                                                                                                                                                                                                                                                                                                                                                                                                                                                                                                                                                                                                                                                                                                                                                                                                                                                                                                                                                                                                                                                                                                                                                                                                                                                                                                                                                                                                                                                                                                                                                                                                                                                                                                                                                                                                                                                                                                                                                                                                                                                                                                                                                                                                                                                                                                                                                                                                                                                                                                                                                                                                                                                                                                                                                                                                                                                                                                                                                                                                                                                                                                                                                                                                                                                                                                                                                                                                                                                                                                                                                                                                                                                                                                                                                                                                                                                                                                                                                                                                                                                                                                                                                                                                                                                                                                                                                                                                                                                                                                                                                                                                                                                                                                                                                                                                                                                                                                                                                                                                                                                                                                                                                                                                                                                                                                                                                                                                                                                                                                                                                                                                                                                                                                                                                                                                                                                                                                                                                                                                                                                                                                                                                                                                                                                                                                                                                                                                                                                                                                                                                                                                                                                                                                                                                                                                                                                                                                                                                                                                                                                                                                                                                                                                                                                                                                                                                                                                                                                                                                                                                                                                                                                                                                                                                                                                                                                                                                                                                                                                                                                                                                                                                                                                                                                                                                                                                                                                            | Labor Dr. Brunner Konstanz                                                       | Robert Koch Institute                                                                               |                                                                                                                                                                                                                                              |
| EPI_ISL_9740672, EPI_ISL_9740681, EPI_ISL_9740689                                                                                                                                                                                                                                                                                                                                                                                                                                                                                                                                                                                                                                                                                                                                                                                                                                                                                                                                                                                                                                                                                                                                                                                                                                                                                                                                                                                                                                                                                                                                                                                                                                                                                                                                                                                                                                                                                                                                                                                                                                                                                                                                                                                                                                                                                                                                                                                                                                                                                                                                                                                                                                                                                                                                                                                                                                                                                                                                                                                                                                                                                                                                                                                                                                                                                                                                                                                                                                                                                                                                                                                                                                                                                                                                                                                                                                                                                                                                                                                                                                                                                                                                                                                                                                                                                                                                                                                                                                                                                                                                                                                                                                                                                                                                                                                                                                                                                                                                                                                                                                                                                                                                                                                                                                                                                                                                                                                                                                                                                                                                                                                                                                                                                                                                                                                                                                                                                                                                                                                                                                                                                                                                                                                                                                                                                                                                                                                                                                                                                                                                                                                                                                                                                                                                                                                                                                                                                                                                                                                                                                                                                                                                                                                                                                                                                                                                                                                                                                                                                                                                                                                                                                                                                                                                                                                                                                                                                                                                                                                                                                                                                                                                                                                                                                                                                                                                                                                                                                                                                                                                                                                                                                                                                                                                                                                                                                                                                                                                                                                                                                                                                                                                                                                                                                                                                                                                                                                                                                                                                                                                                                                                                                                                                                                                                                                                                                                                                                                                                                                                                                                                                                                                                                                                                                                                                                                                                                                                                                                                                                                                                                                                                                                                                                                                                                                                                                                                                                                                                                                                                                                                                                                                                                                                                                                                                                                                                                                                                                                                                                                                                                                                                                                                                                                                                                                                                                                                                                                                                                                                                                                                                                                                                                                                                                                                                                                                                                                                                                                                                                                                                                                                                                                                                                                                                                                                                                                                                                                                                                                                                                                                                                                                                                                                          | Labor Dr. Krause & Kollegen MVZ GmbH Kiel                                        | Robert Koch Institute                                                                               |                                                                                                                                                                                                                                              |
| EPI_ISL_9737749, EPI_ISL_9737754, EPI_ISL_9737793, EPI_ISL_9737803, EPI_ISL_9737811                                                                                                                                                                                                                                                                                                                                                                                                                                                                                                                                                                                                                                                                                                                                                                                                                                                                                                                                                                                                                                                                                                                                                                                                                                                                                                                                                                                                                                                                                                                                                                                                                                                                                                                                                                                                                                                                                                                                                                                                                                                                                                                                                                                                                                                                                                                                                                                                                                                                                                                                                                                                                                                                                                                                                                                                                                                                                                                                                                                                                                                                                                                                                                                                                                                                                                                                                                                                                                                                                                                                                                                                                                                                                                                                                                                                                                                                                                                                                                                                                                                                                                                                                                                                                                                                                                                                                                                                                                                                                                                                                                                                                                                                                                                                                                                                                                                                                                                                                                                                                                                                                                                                                                                                                                                                                                                                                                                                                                                                                                                                                                                                                                                                                                                                                                                                                                                                                                                                                                                                                                                                                                                                                                                                                                                                                                                                                                                                                                                                                                                                                                                                                                                                                                                                                                                                                                                                                                                                                                                                                                                                                                                                                                                                                                                                                                                                                                                                                                                                                                                                                                                                                                                                                                                                                                                                                                                                                                                                                                                                                                                                                                                                                                                                                                                                                                                                                                                                                                                                                                                                                                                                                                                                                                                                                                                                                                                                                                                                                                                                                                                                                                                                                                                                                                                                                                                                                                                                                                                                                                                                                                                                                                                                                                                                                                                                                                                                                                                                                                                                                                                                                                                                                                                                                                                                                                                                                                                                                                                                                                                                                                                                                                                                                                                                                                                                                                                                                                                                                                                                                                                                                                                                                                                                                                                                                                                                                                                                                                                                                                                                                                                                                                                                                                                                                                                                                                                                                                                                                                                                                                                                                                                                                                                                                                                                                                                                                                                                                                                                                                                                                                                                                                                                                                                                                                                                                                                                                                                                                                                                                                                                                                                                                                        | Labor Kneißler GmbH & Co. KG                                                     | Robert Koch Institute                                                                               |                                                                                                                                                                                                                                              |
| EPI_ISL_9726434, EPI_ISL_9726450, EPI_ISL_9726531, EPI_ISL_9726546, EPI_ISL_9726586, EPI_ISL_9726641, EPI_ISL_9726646                                                                                                                                                                                                                                                                                                                                                                                                                                                                                                                                                                                                                                                                                                                                                                                                                                                                                                                                                                                                                                                                                                                                                                                                                                                                                                                                                                                                                                                                                                                                                                                                                                                                                                                                                                                                                                                                                                                                                                                                                                                                                                                                                                                                                                                                                                                                                                                                                                                                                                                                                                                                                                                                                                                                                                                                                                                                                                                                                                                                                                                                                                                                                                                                                                                                                                                                                                                                                                                                                                                                                                                                                                                                                                                                                                                                                                                                                                                                                                                                                                                                                                                                                                                                                                                                                                                                                                                                                                                                                                                                                                                                                                                                                                                                                                                                                                                                                                                                                                                                                                                                                                                                                                                                                                                                                                                                                                                                                                                                                                                                                                                                                                                                                                                                                                                                                                                                                                                                                                                                                                                                                                                                                                                                                                                                                                                                                                                                                                                                                                                                                                                                                                                                                                                                                                                                                                                                                                                                                                                                                                                                                                                                                                                                                                                                                                                                                                                                                                                                                                                                                                                                                                                                                                                                                                                                                                                                                                                                                                                                                                                                                                                                                                                                                                                                                                                                                                                                                                                                                                                                                                                                                                                                                                                                                                                                                                                                                                                                                                                                                                                                                                                                                                                                                                                                                                                                                                                                                                                                                                                                                                                                                                                                                                                                                                                                                                                                                                                                                                                                                                                                                                                                                                                                                                                                                                                                                                                                                                                                                                                                                                                                                                                                                                                                                                                                                                                                                                                                                                                                                                                                                                                                                                                                                                                                                                                                                                                                                                                                                                                                                                                                                                                                                                                                                                                                                                                                                                                                                                                                                                                                                                                                                                                                                                                                                                                                                                                                                                                                                                                                                                                                                                                                                                                                                                                                                                                                                                                                                                                                                                                                                                                                      |                                                                                  |                                                                                                     |                                                                                                                                                                                                                                              |
| see above                                                                                                                                                                                                                                                                                                                                                                                                                                                                                                                                                                                                                                                                                                                                                                                                                                                                                                                                                                                                                                                                                                                                                                                                                                                                                                                                                                                                                                                                                                                                                                                                                                                                                                                                                                                                                                                                                                                                                                                                                                                                                                                                                                                                                                                                                                                                                                                                                                                                                                                                                                                                                                                                                                                                                                                                                                                                                                                                                                                                                                                                                                                                                                                                                                                                                                                                                                                                                                                                                                                                                                                                                                                                                                                                                                                                                                                                                                                                                                                                                                                                                                                                                                                                                                                                                                                                                                                                                                                                                                                                                                                                                                                                                                                                                                                                                                                                                                                                                                                                                                                                                                                                                                                                                                                                                                                                                                                                                                                                                                                                                                                                                                                                                                                                                                                                                                                                                                                                                                                                                                                                                                                                                                                                                                                                                                                                                                                                                                                                                                                                                                                                                                                                                                                                                                                                                                                                                                                                                                                                                                                                                                                                                                                                                                                                                                                                                                                                                                                                                                                                                                                                                                                                                                                                                                                                                                                                                                                                                                                                                                                                                                                                                                                                                                                                                                                                                                                                                                                                                                                                                                                                                                                                                                                                                                                                                                                                                                                                                                                                                                                                                                                                                                                                                                                                                                                                                                                                                                                                                                                                                                                                                                                                                                                                                                                                                                                                                                                                                                                                                                                                                                                                                                                                                                                                                                                                                                                                                                                                                                                                                                                                                                                                                                                                                                                                                                                                                                                                                                                                                                                                                                                                                                                                                                                                                                                                                                                                                                                                                                                                                                                                                                                                                                                                                                                                                                                                                                                                                                                                                                                                                                                                                                                                                                                                                                                                                                                                                                                                                                                                                                                                                                                                                                                                                                                                                                                                                                                                                                                                                                                                                                                                                                                                                                                  | Labor Lübeck bzw. Laborärztliche Gemeinschaftspraxis Lübeck                      | Robert Koch Institute                                                                               |                                                                                                                                                                                                                                              |
| EPI_ISL_9719488, EPI_ISL_9724615, EPI_ISL_9724636, EPI_ISL_9724639, EPI_ISL_9724674, EPI_ISL_9724682, EPI_ISL_9724688, EPI_ISL_9724691, EPI_ISL_9724696                                                                                                                                                                                                                                                                                                                                                                                                                                                                                                                                                                                                                                                                                                                                                                                                                                                                                                                                                                                                                                                                                                                                                                                                                                                                                                                                                                                                                                                                                                                                                                                                                                                                                                                                                                                                                                                                                                                                                                                                                                                                                                                                                                                                                                                                                                                                                                                                                                                                                                                                                                                                                                                                                                                                                                                                                                                                                                                                                                                                                                                                                                                                                                                                                                                                                                                                                                                                                                                                                                                                                                                                                                                                                                                                                                                                                                                                                                                                                                                                                                                                                                                                                                                                                                                                                                                                                                                                                                                                                                                                                                                                                                                                                                                                                                                                                                                                                                                                                                                                                                                                                                                                                                                                                                                                                                                                                                                                                                                                                                                                                                                                                                                                                                                                                                                                                                                                                                                                                                                                                                                                                                                                                                                                                                                                                                                                                                                                                                                                                                                                                                                                                                                                                                                                                                                                                                                                                                                                                                                                                                                                                                                                                                                                                                                                                                                                                                                                                                                                                                                                                                                                                                                                                                                                                                                                                                                                                                                                                                                                                                                                                                                                                                                                                                                                                                                                                                                                                                                                                                                                                                                                                                                                                                                                                                                                                                                                                                                                                                                                                                                                                                                                                                                                                                                                                                                                                                                                                                                                                                                                                                                                                                                                                                                                                                                                                                                                                                                                                                                                                                                                                                                                                                                                                                                                                                                                                                                                                                                                                                                                                                                                                                                                                                                                                                                                                                                                                                                                                                                                                                                                                                                                                                                                                                                                                                                                                                                                                                                                                                                                                                                                                                                                                                                                                                                                                                                                                                                                                                                                                                                                                                                                                                                                                                                                                                                                                                                                                                                                                                                                                                                                                                                                                                                                                                                                                                                                                                                                                                                                                                                                                                    |                                                                                  |                                                                                                     |                                                                                                                                                                                                                                              |
| see above                                                                                                                                                                                                                                                                                                                                                                                                                                                                                                                                                                                                                                                                                                                                                                                                                                                                                                                                                                                                                                                                                                                                                                                                                                                                                                                                                                                                                                                                                                                                                                                                                                                                                                                                                                                                                                                                                                                                                                                                                                                                                                                                                                                                                                                                                                                                                                                                                                                                                                                                                                                                                                                                                                                                                                                                                                                                                                                                                                                                                                                                                                                                                                                                                                                                                                                                                                                                                                                                                                                                                                                                                                                                                                                                                                                                                                                                                                                                                                                                                                                                                                                                                                                                                                                                                                                                                                                                                                                                                                                                                                                                                                                                                                                                                                                                                                                                                                                                                                                                                                                                                                                                                                                                                                                                                                                                                                                                                                                                                                                                                                                                                                                                                                                                                                                                                                                                                                                                                                                                                                                                                                                                                                                                                                                                                                                                                                                                                                                                                                                                                                                                                                                                                                                                                                                                                                                                                                                                                                                                                                                                                                                                                                                                                                                                                                                                                                                                                                                                                                                                                                                                                                                                                                                                                                                                                                                                                                                                                                                                                                                                                                                                                                                                                                                                                                                                                                                                                                                                                                                                                                                                                                                                                                                                                                                                                                                                                                                                                                                                                                                                                                                                                                                                                                                                                                                                                                                                                                                                                                                                                                                                                                                                                                                                                                                                                                                                                                                                                                                                                                                                                                                                                                                                                                                                                                                                                                                                                                                                                                                                                                                                                                                                                                                                                                                                                                                                                                                                                                                                                                                                                                                                                                                                                                                                                                                                                                                                                                                                                                                                                                                                                                                                                                                                                                                                                                                                                                                                                                                                                                                                                                                                                                                                                                                                                                                                                                                                                                                                                                                                                                                                                                                                                                                                                                                                                                                                                                                                                                                                                                                                                                                                                                                                                                                  | Labor Mönchengladbach MVZ Dr. Stein + Kollegen GBR                               | Robert Koch Institute                                                                               |                                                                                                                                                                                                                                              |
| EPI_ISL_9702334                                                                                                                                                                                                                                                                                                                                                                                                                                                                                                                                                                                                                                                                                                                                                                                                                                                                                                                                                                                                                                                                                                                                                                                                                                                                                                                                                                                                                                                                                                                                                                                                                                                                                                                                                                                                                                                                                                                                                                                                                                                                                                                                                                                                                                                                                                                                                                                                                                                                                                                                                                                                                                                                                                                                                                                                                                                                                                                                                                                                                                                                                                                                                                                                                                                                                                                                                                                                                                                                                                                                                                                                                                                                                                                                                                                                                                                                                                                                                                                                                                                                                                                                                                                                                                                                                                                                                                                                                                                                                                                                                                                                                                                                                                                                                                                                                                                                                                                                                                                                                                                                                                                                                                                                                                                                                                                                                                                                                                                                                                                                                                                                                                                                                                                                                                                                                                                                                                                                                                                                                                                                                                                                                                                                                                                                                                                                                                                                                                                                                                                                                                                                                                                                                                                                                                                                                                                                                                                                                                                                                                                                                                                                                                                                                                                                                                                                                                                                                                                                                                                                                                                                                                                                                                                                                                                                                                                                                                                                                                                                                                                                                                                                                                                                                                                                                                                                                                                                                                                                                                                                                                                                                                                                                                                                                                                                                                                                                                                                                                                                                                                                                                                                                                                                                                                                                                                                                                                                                                                                                                                                                                                                                                                                                                                                                                                                                                                                                                                                                                                                                                                                                                                                                                                                                                                                                                                                                                                                                                                                                                                                                                                                                                                                                                                                                                                                                                                                                                                                                                                                                                                                                                                                                                                                                                                                                                                                                                                                                                                                                                                                                                                                                                                                                                                                                                                                                                                                                                                                                                                                                                                                                                                                                                                                                                                                                                                                                                                                                                                                                                                                                                                                                                                                                                                                                                                                                                                                                                                                                                                                                                                                                                                                                                                                                                            | Laboratorio Albaro srl                                                           | U.O. Igiene, Ospedale Policlinico San Martino                                                       | Bruzzoze Bianca; De Pace Vanessa; Domnich Alexander; Icardi Giancarlo on behalf of SARS-CoV-2 ITALIAN RESEARCH ENTERPRISE-(SCIRE) Collaborative Group; Melioli Giovanni; Orsi Andrea; Randazzo Nadia; Ricucci Valentina; Stefanelli Federica |
| EPI_ISL_9616552                                                                                                                                                                                                                                                                                                                                                                                                                                                                                                                                                                                                                                                                                                                                                                                                                                                                                                                                                                                                                                                                                                                                                                                                                                                                                                                                                                                                                                                                                                                                                                                                                                                                                                                                                                                                                                                                                                                                                                                                                                                                                                                                                                                                                                                                                                                                                                                                                                                                                                                                                                                                                                                                                                                                                                                                                                                                                                                                                                                                                                                                                                                                                                                                                                                                                                                                                                                                                                                                                                                                                                                                                                                                                                                                                                                                                                                                                                                                                                                                                                                                                                                                                                                                                                                                                                                                                                                                                                                                                                                                                                                                                                                                                                                                                                                                                                                                                                                                                                                                                                                                                                                                                                                                                                                                                                                                                                                                                                                                                                                                                                                                                                                                                                                                                                                                                                                                                                                                                                                                                                                                                                                                                                                                                                                                                                                                                                                                                                                                                                                                                                                                                                                                                                                                                                                                                                                                                                                                                                                                                                                                                                                                                                                                                                                                                                                                                                                                                                                                                                                                                                                                                                                                                                                                                                                                                                                                                                                                                                                                                                                                                                                                                                                                                                                                                                                                                                                                                                                                                                                                                                                                                                                                                                                                                                                                                                                                                                                                                                                                                                                                                                                                                                                                                                                                                                                                                                                                                                                                                                                                                                                                                                                                                                                                                                                                                                                                                                                                                                                                                                                                                                                                                                                                                                                                                                                                                                                                                                                                                                                                                                                                                                                                                                                                                                                                                                                                                                                                                                                                                                                                                                                                                                                                                                                                                                                                                                                                                                                                                                                                                                                                                                                                                                                                                                                                                                                                                                                                                                                                                                                                                                                                                                                                                                                                                                                                                                                                                                                                                                                                                                                                                                                                                                                                                                                                                                                                                                                                                                                                                                                                                                                                                                                                                                            | Laboratorio Analisi Osp. Città di Castello - Azienda USM Umbria                  | Istituto Zooprofilattico Sperimentale dell'Abruzzo e Molise "G. Caporale"                           | Ancora M; Biagetti M; Calistri P; Cammà C; Curini V; Delli Compagni E; Di Domenico M; Di Pasquale A; Giannarioli M; Lorusso A; Malagoli V; Mangone I; Marcacci M; Puglia I; Rinaldi A; Savini G; Scialabba S; Tacconi P                      |
| EPI_ISL_9597526                                                                                                                                                                                                                                                                                                                                                                                                                                                                                                                                                                                                                                                                                                                                                                                                                                                                                                                                                                                                                                                                                                                                                                                                                                                                                                                                                                                                                                                                                                                                                                                                                                                                                                                                                                                                                                                                                                                                                                                                                                                                                                                                                                                                                                                                                                                                                                                                                                                                                                                                                                                                                                                                                                                                                                                                                                                                                                                                                                                                                                                                                                                                                                                                                                                                                                                                                                                                                                                                                                                                                                                                                                                                                                                                                                                                                                                                                                                                                                                                                                                                                                                                                                                                                                                                                                                                                                                                                                                                                                                                                                                                                                                                                                                                                                                                                                                                                                                                                                                                                                                                                                                                                                                                                                                                                                                                                                                                                                                                                                                                                                                                                                                                                                                                                                                                                                                                                                                                                                                                                                                                                                                                                                                                                                                                                                                                                                                                                                                                                                                                                                                                                                                                                                                                                                                                                                                                                                                                                                                                                                                                                                                                                                                                                                                                                                                                                                                                                                                                                                                                                                                                                                                                                                                                                                                                                                                                                                                                                                                                                                                                                                                                                                                                                                                                                                                                                                                                                                                                                                                                                                                                                                                                                                                                                                                                                                                                                                                                                                                                                                                                                                                                                                                                                                                                                                                                                                                                                                                                                                                                                                                                                                                                                                                                                                                                                                                                                                                                                                                                                                                                                                                                                                                                                                                                                                                                                                                                                                                                                                                                                                                                                                                                                                                                                                                                                                                                                                                                                                                                                                                                                                                                                                                                                                                                                                                                                                                                                                                                                                                                                                                                                                                                                                                                                                                                                                                                                                                                                                                                                                                                                                                                                                                                                                                                                                                                                                                                                                                                                                                                                                                                                                                                                                                                                                                                                                                                                                                                                                                                                                                                                                                                                                                                                                            | Laboratorio di Epidemiologia Molecolare e Sanità Pubblica-Policlinico, Bari      | University of Bari Biomedical Sciences and Human Oncology                                           | Accogli Marisa; Chironna Maria; Loconsole Daniela; Sallustio Anna                                                                                                                                                                            |
| EPI_ISL_9703001                                                                                                                                                                                                                                                                                                                                                                                                                                                                                                                                                                                                                                                                                                                                                                                                                                                                                                                                                                                                                                                                                                                                                                                                                                                                                                                                                                                                                                                                                                                                                                                                                                                                                                                                                                                                                                                                                                                                                                                                                                                                                                                                                                                                                                                                                                                                                                                                                                                                                                                                                                                                                                                                                                                                                                                                                                                                                                                                                                                                                                                                                                                                                                                                                                                                                                                                                                                                                                                                                                                                                                                                                                                                                                                                                                                                                                                                                                                                                                                                                                                                                                                                                                                                                                                                                                                                                                                                                                                                                                                                                                                                                                                                                                                                                                                                                                                                                                                                                                                                                                                                                                                                                                                                                                                                                                                                                                                                                                                                                                                                                                                                                                                                                                                                                                                                                                                                                                                                                                                                                                                                                                                                                                                                                                                                                                                                                                                                                                                                                                                                                                                                                                                                                                                                                                                                                                                                                                                                                                                                                                                                                                                                                                                                                                                                                                                                                                                                                                                                                                                                                                                                                                                                                                                                                                                                                                                                                                                                                                                                                                                                                                                                                                                                                                                                                                                                                                                                                                                                                                                                                                                                                                                                                                                                                                                                                                                                                                                                                                                                                                                                                                                                                                                                                                                                                                                                                                                                                                                                                                                                                                                                                                                                                                                                                                                                                                                                                                                                                                                                                                                                                                                                                                                                                                                                                                                                                                                                                                                                                                                                                                                                                                                                                                                                                                                                                                                                                                                                                                                                                                                                                                                                                                                                                                                                                                                                                                                                                                                                                                                                                                                                                                                                                                                                                                                                                                                                                                                                                                                                                                                                                                                                                                                                                                                                                                                                                                                                                                                                                                                                                                                                                                                                                                                                                                                                                                                                                                                                                                                                                                                                                                                                                                                                                                            | Laboratorio di Microbiologia                                                     | Laboratorio di Microbiologia, Istituto di Medicina di Laboratorio EOLAB, Ente Ospedaliero Cantonale | Martnetti Lucchini Gladys; Valeria Spina                                                                                                                                                                                                     |
| EPI_ISL_9702303, EPI_ISL_9702306, EPI_ISL_9702307                                                                                                                                                                                                                                                                                                                                                                                                                                                                                                                                                                                                                                                                                                                                                                                                                                                                                                                                                                                                                                                                                                                                                                                                                                                                                                                                                                                                                                                                                                                                                                                                                                                                                                                                                                                                                                                                                                                                                                                                                                                                                                                                                                                                                                                                                                                                                                                                                                                                                                                                                                                                                                                                                                                                                                                                                                                                                                                                                                                                                                                                                                                                                                                                                                                                                                                                                                                                                                                                                                                                                                                                                                                                                                                                                                                                                                                                                                                                                                                                                                                                                                                                                                                                                                                                                                                                                                                                                                                                                                                                                                                                                                                                                                                                                                                                                                                                                                                                                                                                                                                                                                                                                                                                                                                                                                                                                                                                                                                                                                                                                                                                                                                                                                                                                                                                                                                                                                                                                                                                                                                                                                                                                                                                                                                                                                                                                                                                                                                                                                                                                                                                                                                                                                                                                                                                                                                                                                                                                                                                                                                                                                                                                                                                                                                                                                                                                                                                                                                                                                                                                                                                                                                                                                                                                                                                                                                                                                                                                                                                                                                                                                                                                                                                                                                                                                                                                                                                                                                                                                                                                                                                                                                                                                                                                                                                                                                                                                                                                                                                                                                                                                                                                                                                                                                                                                                                                                                                                                                                                                                                                                                                                                                                                                                                                                                                                                                                                                                                                                                                                                                                                                                                                                                                                                                                                                                                                                                                                                                                                                                                                                                                                                                                                                                                                                                                                                                                                                                                                                                                                                                                                                                                                                                                                                                                                                                                                                                                                                                                                                                                                                                                                                                                                                                                                                                                                                                                                                                                                                                                                                                                                                                                                                                                                                                                                                                                                                                                                                                                                                                                                                                                                                                                                                                                                                                                                                                                                                                                                                                                                                                                                                                                                                                                          | Laboratorio di Patologia Clinica, Ospedale San Paolo in Valloria, ASL 2 Liguria  | U.O. Igiene, Ospedale Policlinico San Martino                                                       | Bruzzoze Bianca; De Pace Vanessa; Domnich Alexander; Icardi Giancarlo on behalf of SARS-CoV-2 ITALIAN RESEARCH ENTERPRISE-(SCIRE) Collaborative Group; Lillo Flavia; Orsi Andrea; Randazzo Nadia; Ricucci Valentina; Stefanelli Federica     |
| EPI_ISL_9512460, EPI_ISL_9512462, EPI_ISL_9512463, EPI_ISL_9512492, EPI_ISL_9512512, EPI_ISL_9512513, EPI_ISL_9614585, EPI_ISL_9614586, EPI_ISL_9614587, EPI_ISL_9614588, EPI_ISL_9614589, EPI_ISL_9614590, EPI_ISL_9614591, EPI_ISL_9614592, EPI_ISL_9614617, EPI_ISL_9614619                                                                                                                                                                                                                                                                                                                                                                                                                                                                                                                                                                                                                                                                                                                                                                                                                                                                                                                                                                                                                                                                                                                                                                                                                                                                                                                                                                                                                                                                                                                                                                                                                                                                                                                                                                                                                                                                                                                                                                                                                                                                                                                                                                                                                                                                                                                                                                                                                                                                                                                                                                                                                                                                                                                                                                                                                                                                                                                                                                                                                                                                                                                                                                                                                                                                                                                                                                                                                                                                                                                                                                                                                                                                                                                                                                                                                                                                                                                                                                                                                                                                                                                                                                                                                                                                                                                                                                                                                                                                                                                                                                                                                                                                                                                                                                                                                                                                                                                                                                                                                                                                                                                                                                                                                                                                                                                                                                                                                                                                                                                                                                                                                                                                                                                                                                                                                                                                                                                                                                                                                                                                                                                                                                                                                                                                                                                                                                                                                                                                                                                                                                                                                                                                                                                                                                                                                                                                                                                                                                                                                                                                                                                                                                                                                                                                                                                                                                                                                                                                                                                                                                                                                                                                                                                                                                                                                                                                                                                                                                                                                                                                                                                                                                                                                                                                                                                                                                                                                                                                                                                                                                                                                                                                                                                                                                                                                                                                                                                                                                                                                                                                                                                                                                                                                                                                                                                                                                                                                                                                                                                                                                                                                                                                                                                                                                                                                                                                                                                                                                                                                                                                                                                                                                                                                                                                                                                                                                                                                                                                                                                                                                                                                                                                                                                                                                                                                                                                                                                                                                                                                                                                                                                                                                                                                                                                                                                                                                                                                                                                                                                                                                                                                                                                                                                                                                                                                                                                                                                                                                                                                                                                                                                                                                                                                                                                                                                                                                                                                                                                                                                                                                                                                                                                                                                                                                                                                                                                                                                                                                             |                                                                                  |                                                                                                     |                                                                                                                                                                                                                                              |
| see above                                                                                                                                                                                                                                                                                                                                                                                                                                                                                                                                                                                                                                                                                                                                                                                                                                                                                                                                                                                                                                                                                                                                                                                                                                                                                                                                                                                                                                                                                                                                                                                                                                                                                                                                                                                                                                                                                                                                                                                                                                                                                                                                                                                                                                                                                                                                                                                                                                                                                                                                                                                                                                                                                                                                                                                                                                                                                                                                                                                                                                                                                                                                                                                                                                                                                                                                                                                                                                                                                                                                                                                                                                                                                                                                                                                                                                                                                                                                                                                                                                                                                                                                                                                                                                                                                                                                                                                                                                                                                                                                                                                                                                                                                                                                                                                                                                                                                                                                                                                                                                                                                                                                                                                                                                                                                                                                                                                                                                                                                                                                                                                                                                                                                                                                                                                                                                                                                                                                                                                                                                                                                                                                                                                                                                                                                                                                                                                                                                                                                                                                                                                                                                                                                                                                                                                                                                                                                                                                                                                                                                                                                                                                                                                                                                                                                                                                                                                                                                                                                                                                                                                                                                                                                                                                                                                                                                                                                                                                                                                                                                                                                                                                                                                                                                                                                                                                                                                                                                                                                                                                                                                                                                                                                                                                                                                                                                                                                                                                                                                                                                                                                                                                                                                                                                                                                                                                                                                                                                                                                                                                                                                                                                                                                                                                                                                                                                                                                                                                                                                                                                                                                                                                                                                                                                                                                                                                                                                                                                                                                                                                                                                                                                                                                                                                                                                                                                                                                                                                                                                                                                                                                                                                                                                                                                                                                                                                                                                                                                                                                                                                                                                                                                                                                                                                                                                                                                                                                                                                                                                                                                                                                                                                                                                                                                                                                                                                                                                                                                                                                                                                                                                                                                                                                                                                                                                                                                                                                                                                                                                                                                                                                                                                                                                                                                                  | Laboratorium Diagnostyki Medycznej                                               | Wojewódzka Stacja Sanitarno-Epidemiologiczna w Gdańsku                                              | Barbara Skórczewska; Gabriela Rutkowska; Karolina Smarzyńska; Marta Piszczyk                                                                                                                                                                 |
| EPI_ISL_9799932, EPI_ISL_9799937, EPI_ISL_9799947, EPI_ISL_9799973, EPI_ISL_9799987, EPI_ISL_9799996                                                                                                                                                                                                                                                                                                                                                                                                                                                                                                                                                                                                                                                                                                                                                                                                                                                                                                                                                                                                                                                                                                                                                                                                                                                                                                                                                                                                                                                                                                                                                                                                                                                                                                                                                                                                                                                                                                                                                                                                                                                                                                                                                                                                                                                                                                                                                                                                                                                                                                                                                                                                                                                                                                                                                                                                                                                                                                                                                                                                                                                                                                                                                                                                                                                                                                                                                                                                                                                                                                                                                                                                                                                                                                                                                                                                                                                                                                                                                                                                                                                                                                                                                                                                                                                                                                                                                                                                                                                                                                                                                                                                                                                                                                                                                                                                                                                                                                                                                                                                                                                                                                                                                                                                                                                                                                                                                                                                                                                                                                                                                                                                                                                                                                                                                                                                                                                                                                                                                                                                                                                                                                                                                                                                                                                                                                                                                                                                                                                                                                                                                                                                                                                                                                                                                                                                                                                                                                                                                                                                                                                                                                                                                                                                                                                                                                                                                                                                                                                                                                                                                                                                                                                                                                                                                                                                                                                                                                                                                                                                                                                                                                                                                                                                                                                                                                                                                                                                                                                                                                                                                                                                                                                                                                                                                                                                                                                                                                                                                                                                                                                                                                                                                                                                                                                                                                                                                                                                                                                                                                                                                                                                                                                                                                                                                                                                                                                                                                                                                                                                                                                                                                                                                                                                                                                                                                                                                                                                                                                                                                                                                                                                                                                                                                                                                                                                                                                                                                                                                                                                                                                                                                                                                                                                                                                                                                                                                                                                                                                                                                                                                                                                                                                                                                                                                                                                                                                                                                                                                                                                                                                                                                                                                                                                                                                                                                                                                                                                                                                                                                                                                                                                                                                                                                                                                                                                                                                                                                                                                                                                                                                                                                                                                       |                                                                                  |                                                                                                     |                                                                                                                                                                                                                                              |
| EPI_ISL_9511722, EPI_ISL_9511729, EPI_ISL_9569035, EPI_ISL_9569037                                                                                                                                                                                                                                                                                                                                                                                                                                                                                                                                                                                                                                                                                                                                                                                                                                                                                                                                                                                                                                                                                                                                                                                                                                                                                                                                                                                                                                                                                                                                                                                                                                                                                                                                                                                                                                                                                                                                                                                                                                                                                                                                                                                                                                                                                                                                                                                                                                                                                                                                                                                                                                                                                                                                                                                                                                                                                                                                                                                                                                                                                                                                                                                                                                                                                                                                                                                                                                                                                                                                                                                                                                                                                                                                                                                                                                                                                                                                                                                                                                                                                                                                                                                                                                                                                                                                                                                                                                                                                                                                                                                                                                                                                                                                                                                                                                                                                                                                                                                                                                                                                                                                                                                                                                                                                                                                                                                                                                                                                                                                                                                                                                                                                                                                                                                                                                                                                                                                                                                                                                                                                                                                                                                                                                                                                                                                                                                                                                                                                                                                                                                                                                                                                                                                                                                                                                                                                                                                                                                                                                                                                                                                                                                                                                                                                                                                                                                                                                                                                                                                                                                                                                                                                                                                                                                                                                                                                                                                                                                                                                                                                                                                                                                                                                                                                                                                                                                                                                                                                                                                                                                                                                                                                                                                                                                                                                                                                                                                                                                                                                                                                                                                                                                                                                                                                                                                                                                                                                                                                                                                                                                                                                                                                                                                                                                                                                                                                                                                                                                                                                                                                                                                                                                                                                                                                                                                                                                                                                                                                                                                                                                                                                                                                                                                                                                                                                                                                                                                                                                                                                                                                                                                                                                                                                                                                                                                                                                                                                                                                                                                                                                                                                                                                                                                                                                                                                                                                                                                                                                                                                                                                                                                                                                                                                                                                                                                                                                                                                                                                                                                                                                                                                                                                                                                                                                                                                                                                                                                                                                                                                                                                                                                                                                         | Laboratorium Medyczne GynCentrum                                                 | Wojewódzka Stacja Sanitarno-Epidemiologiczna w Katowicach                                           | Adrian Miara; Agata Chajda; Beata Rozwadowska; Elzbieta Bartkowiak; Marta Albertyńska                                                                                                                                                        |
| EPI_ISL_9568175, EPI_ISL_9686176, EPI_ISL_9686290, EPI_ISL_9686291, EPI_ISL_9686292, EPI_ISL_9686293, EPI_ISL_9686294, EPI_ISL_9686295, EPI_ISL_9686296, EPI_ISL_9686297, EPI_ISL_9686298, EPI_ISL_9686299, EPI_ISL_9686300, EPI_ISL_9686301, EPI_ISL_9686302, EPI_ISL_9686304                                                                                                                                                                                                                                                                                                                                                                                                                                                                                                                                                                                                                                                                                                                                                                                                                                                                                                                                                                                                                                                                                                                                                                                                                                                                                                                                                                                                                                                                                                                                                                                                                                                                                                                                                                                                                                                                                                                                                                                                                                                                                                                                                                                                                                                                                                                                                                                                                                                                                                                                                                                                                                                                                                                                                                                                                                                                                                                                                                                                                                                                                                                                                                                                                                                                                                                                                                                                                                                                                                                                                                                                                                                                                                                                                                                                                                                                                                                                                                                                                                                                                                                                                                                                                                                                                                                                                                                                                                                                                                                                                                                                                                                                                                                                                                                                                                                                                                                                                                                                                                                                                                                                                                                                                                                                                                                                                                                                                                                                                                                                                                                                                                                                                                                                                                                                                                                                                                                                                                                                                                                                                                                                                                                                                                                                                                                                                                                                                                                                                                                                                                                                                                                                                                                                                                                                                                                                                                                                                                                                                                                                                                                                                                                                                                                                                                                                                                                                                                                                                                                                                                                                                                                                                                                                                                                                                                                                                                                                                                                                                                                                                                                                                                                                                                                                                                                                                                                                                                                                                                                                                                                                                                                                                                                                                                                                                                                                                                                                                                                                                                                                                                                                                                                                                                                                                                                                                                                                                                                                                                                                                                                                                                                                                                                                                                                                                                                                                                                                                                                                                                                                                                                                                                                                                                                                                                                                                                                                                                                                                                                                                                                                                                                                                                                                                                                                                                                                                                                                                                                                                                                                                                                                                                                                                                                                                                                                                                                                                                                                                                                                                                                                                                                                                                                                                                                                                                                                                                                                                                                                                                                                                                                                                                                                                                                                                                                                                                                                                                                                                                                                                                                                                                                                                                                                                                                                                                                                                                                                                                             |                                                                                  |                                                                                                     |                                                                                                                                                                                                                                              |
| see above                                                                                                                                                                                                                                                                                                                                                                                                                                                                                                                                                                                                                                                                                                                                                                                                                                                                                                                                                                                                                                                                                                                                                                                                                                                                                                                                                                                                                                                                                                                                                                                                                                                                                                                                                                                                                                                                                                                                                                                                                                                                                                                                                                                                                                                                                                                                                                                                                                                                                                                                                                                                                                                                                                                                                                                                                                                                                                                                                                                                                                                                                                                                                                                                                                                                                                                                                                                                                                                                                                                                                                                                                                                                                                                                                                                                                                                                                                                                                                                                                                                                                                                                                                                                                                                                                                                                                                                                                                                                                                                                                                                                                                                                                                                                                                                                                                                                                                                                                                                                                                                                                                                                                                                                                                                                                                                                                                                                                                                                                                                                                                                                                                                                                                                                                                                                                                                                                                                                                                                                                                                                                                                                                                                                                                                                                                                                                                                                                                                                                                                                                                                                                                                                                                                                                                                                                                                                                                                                                                                                                                                                                                                                                                                                                                                                                                                                                                                                                                                                                                                                                                                                                                                                                                                                                                                                                                                                                                                                                                                                                                                                                                                                                                                                                                                                                                                                                                                                                                                                                                                                                                                                                                                                                                                                                                                                                                                                                                                                                                                                                                                                                                                                                                                                                                                                                                                                                                                                                                                                                                                                                                                                                                                                                                                                                                                                                                                                                                                                                                                                                                                                                                                                                                                                                                                                                                                                                                                                                                                                                                                                                                                                                                                                                                                                                                                                                                                                                                                                                                                                                                                                                                                                                                                                                                                                                                                                                                                                                                                                                                                                                                                                                                                                                                                                                                                                                                                                                                                                                                                                                                                                                                                                                                                                                                                                                                                                                                                                                                                                                                                                                                                                                                                                                                                                                                                                                                                                                                                                                                                                                                                                                                                                                                                                                                                  | Lancet                                                                           | National Institute for Communicable Diseases of the National Health Laboratory Service              | Amoako DG; Bhiman JN; Everatt J; Ismail A; Kekana D; Mahlangu B; Mnguni A; Mohale T; Ntuli N; Scheepers C; Wolter N                                                                                                                          |
| EPI_ISL_9728525, EPI_ISL_9741784, EPI_ISL_9741809, EPI_ISL_9741813, EPI_ISL_9741845, EPI_ISL_9741869, EPI_ISL_9741928, EPI_ISL_9741988, EPI_ISL_9742014                                                                                                                                                                                                                                                                                                                                                                                                                                                                                                                                                                                                                                                                                                                                                                                                                                                                                                                                                                                                                                                                                                                                                                                                                                                                                                                                                                                                                                                                                                                                                                                                                                                                                                                                                                                                                                                                                                                                                                                                                                                                                                                                                                                                                                                                                                                                                                                                                                                                                                                                                                                                                                                                                                                                                                                                                                                                                                                                                                                                                                                                                                                                                                                                                                                                                                                                                                                                                                                                                                                                                                                                                                                                                                                                                                                                                                                                                                                                                                                                                                                                                                                                                                                                                                                                                                                                                                                                                                                                                                                                                                                                                                                                                                                                                                                                                                                                                                                                                                                                                                                                                                                                                                                                                                                                                                                                                                                                                                                                                                                                                                                                                                                                                                                                                                                                                                                                                                                                                                                                                                                                                                                                                                                                                                                                                                                                                                                                                                                                                                                                                                                                                                                                                                                                                                                                                                                                                                                                                                                                                                                                                                                                                                                                                                                                                                                                                                                                                                                                                                                                                                                                                                                                                                                                                                                                                                                                                                                                                                                                                                                                                                                                                                                                                                                                                                                                                                                                                                                                                                                                                                                                                                                                                                                                                                                                                                                                                                                                                                                                                                                                                                                                                                                                                                                                                                                                                                                                                                                                                                                                                                                                                                                                                                                                                                                                                                                                                                                                                                                                                                                                                                                                                                                                                                                                                                                                                                                                                                                                                                                                                                                                                                                                                                                                                                                                                                                                                                                                                                                                                                                                                                                                                                                                                                                                                                                                                                                                                                                                                                                                                                                                                                                                                                                                                                                                                                                                                                                                                                                                                                                                                                                                                                                                                                                                                                                                                                                                                                                                                                                                                                                                                                                                                                                                                                                                                                                                                                                                                                                                                                                                                                    |                                                                                  |                                                                                                     |                                                                                                                                                                                                                                              |
| see above                                                                                                                                                                                                                                                                                                                                                                                                                                                                                                                                                                                                                                                                                                                                                                                                                                                                                                                                                                                                                                                                                                                                                                                                                                                                                                                                                                                                                                                                                                                                                                                                                                                                                                                                                                                                                                                                                                                                                                                                                                                                                                                                                                                                                                                                                                                                                                                                                                                                                                                                                                                                                                                                                                                                                                                                                                                                                                                                                                                                                                                                                                                                                                                                                                                                                                                                                                                                                                                                                                                                                                                                                                                                                                                                                                                                                                                                                                                                                                                                                                                                                                                                                                                                                                                                                                                                                                                                                                                                                                                                                                                                                                                                                                                                                                                                                                                                                                                                                                                                                                                                                                                                                                                                                                                                                                                                                                                                                                                                                                                                                                                                                                                                                                                                                                                                                                                                                                                                                                                                                                                                                                                                                                                                                                                                                                                                                                                                                                                                                                                                                                                                                                                                                                                                                                                                                                                                                                                                                                                                                                                                                                                                                                                                                                                                                                                                                                                                                                                                                                                                                                                                                                                                                                                                                                                                                                                                                                                                                                                                                                                                                                                                                                                                                                                                                                                                                                                                                                                                                                                                                                                                                                                                                                                                                                                                                                                                                                                                                                                                                                                                                                                                                                                                                                                                                                                                                                                                                                                                                                                                                                                                                                                                                                                                                                                                                                                                                                                                                                                                                                                                                                                                                                                                                                                                                                                                                                                                                                                                                                                                                                                                                                                                                                                                                                                                                                                                                                                                                                                                                                                                                                                                                                                                                                                                                                                                                                                                                                                                                                                                                                                                                                                                                                                                                                                                                                                                                                                                                                                                                                                                                                                                                                                                                                                                                                                                                                                                                                                                                                                                                                                                                                                                                                                                                                                                                                                                                                                                                                                                                                                                                                                                                                                                                                                  | Landesamt für Verbraucherschutz des Landes Sachsen-Anhalt                        | Robert Koch Institute                                                                               |                                                                                                                                                                                                                                              |
| EPI_ISL_9744859, EPI_ISL_9744878, EPI_ISL_9745005, EPI_ISL_9745130                                                                                                                                                                                                                                                                                                                                                                                                                                                                                                                                                                                                                                                                                                                                                                                                                                                                                                                                                                                                                                                                                                                                                                                                                                                                                                                                                                                                                                                                                                                                                                                                                                                                                                                                                                                                                                                                                                                                                                                                                                                                                                                                                                                                                                                                                                                                                                                                                                                                                                                                                                                                                                                                                                                                                                                                                                                                                                                                                                                                                                                                                                                                                                                                                                                                                                                                                                                                                                                                                                                                                                                                                                                                                                                                                                                                                                                                                                                                                                                                                                                                                                                                                                                                                                                                                                                                                                                                                                                                                                                                                                                                                                                                                                                                                                                                                                                                                                                                                                                                                                                                                                                                                                                                                                                                                                                                                                                                                                                                                                                                                                                                                                                                                                                                                                                                                                                                                                                                                                                                                                                                                                                                                                                                                                                                                                                                                                                                                                                                                                                                                                                                                                                                                                                                                                                                                                                                                                                                                                                                                                                                                                                                                                                                                                                                                                                                                                                                                                                                                                                                                                                                                                                                                                                                                                                                                                                                                                                                                                                                                                                                                                                                                                                                                                                                                                                                                                                                                                                                                                                                                                                                                                                                                                                                                                                                                                                                                                                                                                                                                                                                                                                                                                                                                                                                                                                                                                                                                                                                                                                                                                                                                                                                                                                                                                                                                                                                                                                                                                                                                                                                                                                                                                                                                                                                                                                                                                                                                                                                                                                                                                                                                                                                                                                                                                                                                                                                                                                                                                                                                                                                                                                                                                                                                                                                                                                                                                                                                                                                                                                                                                                                                                                                                                                                                                                                                                                                                                                                                                                                                                                                                                                                                                                                                                                                                                                                                                                                                                                                                                                                                                                                                                                                                                                                                                                                                                                                                                                                                                                                                                                                                                                                                                                         | Landesuntersuchungsanstalt für das Gesundheits- und Veterinärwesen (LUA) Sachsen | Robert Koch Institute                                                                               |                                                                                                                                                                                                                                              |
| EPI_ISL_9597330, EPI_ISL_9597381, EPI_ISL_9597407, EPI_ISL_9597491, EPI_ISL_9597553, EPI_ISL_9597598, EPI_ISL_9597694, EPI_ISL_9601132, EPI_ISL_9603325, EPI_ISL_9603339, EPI_ISL_9603344, EPI_ISL_9603362, EPI_ISL_9603384, EPI_ISL_9603385, EPI_ISL_9603402, EPI_ISL_9603412, EPI_ISL_9603415, EPI_ISL_9603499, EPI_ISL_9603556, EPI_ISL_9603596, EPI_ISL_9603660, EPI_ISL_9603689, EPI_ISL_9603699, EPI_ISL_9603735, EPI_ISL_9603811, EPI_ISL_9603833, EPI_ISL_9604001, EPI_ISL_9604009, EPI_ISL_9604008, EPI_ISL_9604017, EPI_ISL_9604100, EPI_ISL_9604013, EPI_ISL_9604029, EPI_ISL_9604243, EPI_ISL_9604504, EPI_ISL_9604511, EPI_ISL_9604512, EPI_ISL_9604516, EPI_ISL_9604519, EPI_ISL_9604520, EPI_ISL_9604521, EPI_ISL_9604526, EPI_ISL_9604527, EPI_ISL_9604528, EPI_ISL_9604529, EPI_ISL_9604530, EPI_ISL_9604531, EPI_ISL_9604532, EPI_ISL_9604533, EPI_ISL_9604534, EPI_ISL_9604535, EPI_ISL_9604536, EPI_ISL_9604537, EPI_ISL_9604538, EPI_ISL_9604539, EPI_ISL_9604540, EPI_ISL_9604541, EPI_ISL_9604542, EPI_ISL_9604543, EPI_ISL_9604544, EPI_ISL_9604545, EPI_ISL_9604546, EPI_ISL_9604547, EPI_ISL_9604548, EPI_ISL_9604549, EPI_ISL_9604550, EPI_ISL_9604551, EPI_ISL_9604552, EPI_ISL_9604553, EPI_ISL_9604554, EPI_ISL_9604555, EPI_ISL_9604556, EPI_ISL_9604557, EPI_ISL_9604558, EPI_ISL_9604559, EPI_ISL_9604560, EPI_ISL_9604561, EPI_ISL_9604562, EPI_ISL_9604563, EPI_ISL_9604564, EPI_ISL_9604565, EPI_ISL_9604566, EPI_ISL_9604567, EPI_ISL_9604568, EPI_ISL_9604569, EPI_ISL_9604570, EPI_ISL_9604571, EPI_ISL_9604572, EPI_ISL_9604573, EPI_ISL_9604574, EPI_ISL_9604575, EPI_ISL_9604576, EPI_ISL_9604577, EPI_ISL_9604578, EPI_ISL_9604579, EPI_ISL_9604580, EPI_ISL_9604581, EPI_ISL_9604582, EPI_ISL_9604583, EPI_ISL_9604584, EPI_ISL_9604585, EPI_ISL_9604586, EPI_ISL_9604587, EPI_ISL_9604588, EPI_ISL_9604589, EPI_ISL_9604590, EPI_ISL_9604591, EPI_ISL_9604592, EPI_ISL_9604593, EPI_ISL_9604594, EPI_ISL_9604595, EPI_ISL_9604596, EPI_ISL_9604597, EPI_ISL_9604598, EPI_ISL_9604599, EPI_ISL_9604600, EPI_ISL_9604601, EPI_ISL_9604602, EPI_ISL_9604603, EPI_ISL_9604604, EPI_ISL_9604605, EPI_ISL_9604606, EPI_ISL_9604607, EPI_ISL_9604608, EPI_ISL_9604609, EPI_ISL_9604610, EPI_ISL_9604611, EPI_ISL_9604612, EPI_ISL_9604613, EPI_ISL_9604614, EPI_ISL_9604615, EPI_ISL_9604616, EPI_ISL_9604617, EPI_ISL_9604618, EPI_ISL_9604619, EPI_ISL_9604620, EPI_ISL_9604621, EPI_ISL_9604622, EPI_ISL_9604623, EPI_ISL_9604624, EPI_ISL_9604625, EPI_ISL_9604626, EPI_ISL_9604627, EPI_ISL_9604628, EPI_ISL_9604629, EPI_ISL_9604630, EPI_ISL_9604631, EPI_ISL_9604632, EPI_ISL_9604633, EPI_ISL_9604634, EPI_ISL_9604635, EPI_ISL_9604636, EPI_ISL_9604637, EPI_ISL_9604638, EPI_ISL_9604639, EPI_ISL_9604640, EPI_ISL_9604641, EPI_ISL_9604642, EPI_ISL_9604643, EPI_ISL_9604644, EPI_ISL_9604645, EPI_ISL_9604646, EPI_ISL_9604647, EPI_ISL_9604648, EPI_ISL_9604649, EPI_ISL_9604650, EPI_ISL_9604651, EPI_ISL_9604652, EPI_ISL_9604653, EPI_ISL_9604654, EPI_ISL_9604655, EPI_ISL_9604656, EPI_ISL_9604657, EPI_ISL_9604658, EPI_ISL_9604659, EPI_ISL_9604660, EPI_ISL_9604661, EPI_ISL_9604662, EPI_ISL_9604663, EPI_ISL_9604664, EPI_ISL_9604665, EPI_ISL_9604666, EPI_ISL_9604667, EPI_ISL_9604668, EPI_ISL_9604669, EPI_ISL_9604670, EPI_ISL_9604671, EPI_ISL_9604672, EPI_ISL_9604673, EPI_ISL_9604674, EPI_ISL_9604675, EPI_ISL_9604676, EPI_ISL_9604677, EPI_ISL_9604678, EPI_ISL_9604679, EPI_ISL_9604680, EPI_ISL_9604681, EPI_ISL_9604682, EPI_ISL_9604683, EPI_ISL_9604684, EPI_ISL_9604685, EPI_ISL_9604686, EPI_ISL_9604687, EPI_ISL_9604688, EPI_ISL_9604689, EPI_ISL_9604690, EPI_ISL_9604691, EPI_ISL_9604692, EPI_ISL_9604693, EPI_ISL_9604694, EPI_ISL_9604695, EPI_ISL_9604696, EPI_ISL_9604697, EPI_ISL_9604698, EPI_ISL_9604699, EPI_ISL_9604700, EPI_ISL_9604701, EPI_ISL_9604702, EPI_ISL_9604703, EPI_ISL_9604704, EPI_ISL_9604705, EPI_ISL_9604706, EPI_ISL_9604707, EPI_ISL_9604708, EPI_ISL_9604709, EPI_ISL_9604710, EPI_ISL_9604711, EPI_ISL_9604712, EPI_ISL_9604713, EPI_ISL_9604714, EPI_ISL_9604715, EPI_ISL_9604716, EPI_ISL_9604717, EPI_ISL_9604718, EPI_ISL_9604719, EPI_ISL_9604720, EPI_ISL_9604721, EPI_ISL_9604722, EPI_ISL_9604723, EPI_ISL_9604724, EPI_ISL_9604725, EPI_ISL_9604726, EPI_ISL_9604727, EPI_ISL_9604728, EPI_ISL_9604729, EPI_ISL_9604730, EPI_ISL_9604731, EPI_ISL_9604732, EPI_ISL_9604733, EPI_ISL_9604734, EPI_ISL_9604735, EPI_ISL_9604736, EPI_ISL_9604737, EPI_ISL_9604738, EPI_ISL_9604739, EPI_ISL_9604740, EPI_ISL_9604741, EPI_ISL_9604742, EPI_ISL_9604743, EPI_ISL_9604744, EPI_ISL_9604745, EPI_ISL_9604746, EPI_ISL_9604747, EPI_ISL_9604748, EPI_ISL_9604749, EPI_ISL_9604750, EPI_ISL_9604751, EPI_ISL_9604752, EPI_ISL_9604753, EPI_ISL_9604754, EPI_ISL_9604755, EPI_ISL_9604756, EPI_ISL_9604757, EPI_ISL_9604758, EPI_ISL_9604759, EPI_ISL_9604760, EPI_ISL_9604761, EPI_ISL_9604762, EPI_ISL_9604763, EPI_ISL_9604764, EPI_ISL_9604765, EPI_ISL_9604766, EPI_ISL_9604767, EPI_ISL_9604768, EPI_ISL_9604769, EPI_ISL_9604770, EPI_ISL_9604771, EPI_ISL_9604772, EPI_ISL_9604773, EPI_ISL_9604774, EPI_ISL_9604775, EPI_ISL_9604776, EPI_ISL_9604777, EPI_ISL_9604778, EPI_ISL_9604779, EPI_ISL_9604780, EPI_ISL_9604781, EPI_ISL_9604782, EPI_ISL_9604783, EPI_ISL_9604784, EPI_ISL_9604785, EPI_ISL_9604786, EPI_ISL_9604787, EPI_ISL_9604788, EPI_ISL_9604789, EPI_ISL_9604790, EPI_ISL_9604791, EPI_ISL_9604792, EPI_ISL_9604793, EPI_ISL_9604794, EPI_ISL_9604795, EPI_ISL_9604796, EPI_ISL_9604797, EPI_ISL_9604798, EPI_ISL_9604799, EPI_ISL_9604800, EPI_ISL_9604801, EPI_ISL_9604802, EPI_ISL_9604803, EPI_ISL_9604804, EPI_ISL_9604805, EPI_ISL_9604806, EPI_ISL_9604807, EPI_ISL_9604808, EPI_ISL_9604809, EPI_ISL_9604810, EPI_ISL_9604811, EPI_ISL_9604812, EPI_ISL_9604813, EPI_ISL_9604814, EPI_ISL_9604815, EPI_ISL_9604816, EPI_ISL_9604817, EPI_ISL_9604818, EPI_ISL_9604819, EPI_ISL_9604820, EPI_ISL_9604821, EPI_ISL_9604822, EPI_ISL_9604823, EPI_ISL_9604824, EPI_ISL_9604825, EPI_ISL_9604826, EPI_ISL_9604827, EPI_ISL_9604828, EPI_ISL_9604829, EPI_ISL_9604830, EPI_ISL_9604831, EPI_ISL_9604832, EPI_ISL_9604833, EPI_ISL_9604834, EPI_ISL_9604835, EPI_ISL_9604836, EPI_ISL_9604837, EPI_ISL_9604838, EPI_ISL_9604839, EPI_ISL_9604840, EPI_ISL_9604841, EPI_ISL_9604842, EPI_ISL_9604843, EPI_ISL_9604844, EPI_ISL_9604845, EPI_ISL_9604846, EPI_ISL_9604847, EPI_ISL_9604848, EPI_ISL_9604849, EPI_ISL_9604850, EPI_ISL_9604851, EPI_ISL_9604852, EPI_ISL_9604853, EPI_ISL_9604854, EPI_ISL_9604855, EPI_ISL_9604856, EPI_ISL_9604857, EPI_ISL_9604858, EPI_ISL_9604859, EPI_ISL_9604860, EPI_ISL_9604861, EPI_ISL_9604862, EPI_ISL_9604863, EPI_ISL_9604864, EPI_ISL_9604865, EPI_ISL_9604866, EPI_ISL_9604867, EPI_ISL_9604868, EPI_ISL_9604869, EPI_ISL_9604870, EPI_ISL_9604871, EPI_ISL_9604872, EPI_ISL_9604873, EPI_ISL_9604874, EPI_ISL_9604875, EPI_ISL_9604876, EPI_ISL_9604877, EPI_ISL_9604878, EPI_ISL_9604879, EPI_ISL_9604880, EPI_ISL_9604881, EPI_ISL_9604882, EPI_ISL_9604883, EPI_ISL_9604884, EPI_ISL_9604885, EPI_ISL_9604886, EPI_ISL_9604887, EPI_ISL_9604888, EPI_ISL_9604889, EPI_ISL_9604890, EPI_ISL_9604891, EPI_ISL_9604892, EPI_ISL_9604893, EPI_ISL_9604894, EPI_ISL_9604895, EPI_ISL_9604896, EPI_ISL_9604897, EPI_ISL_9604898, EPI_ISL_9604899, EPI_ISL_9604900, EPI_ISL_9604901, EPI_ISL_9604902, EPI_ISL_9604903, EPI_ISL_9604904, EPI_ISL_9604905, EPI_ISL_9604906, EPI_ISL_9604907, EPI_ISL_9604908, EPI_ISL_9604909, EPI_ISL_9604910, EPI_ISL_9604911, EPI_ISL_9604912, EPI_ISL_9604913, EPI_ISL_9604914, EPI_ISL_9604915, EPI_ISL_9604916, EPI_ISL_9604917, EPI_ISL_9604918, EPI_ISL_9604919, EPI_ISL_9604920, EPI_ISL_9604921, EPI_ISL_9604922, EPI_ISL_9604923, EPI_ISL_9604924, EPI_ISL_9604925, EPI_ISL_9604926, EPI_ISL_9604927, EPI_ISL_9604928, EPI_ISL_9604929, EPI_ISL_9604930, EPI_ISL_9604931, EPI_ISL_9604932, EPI_ISL_9604933, EPI_ISL_9604934, EPI_ISL_9604935, EPI_ISL_9604936, EPI_ISL_9604937, EPI_ISL_9604938, EPI_ISL_9604939, EPI_ISL_9604940, EPI_ISL_9604941, EPI_ISL_9604942, EPI_ISL_9604943, EPI_ISL_9604944, EPI_ISL_9604945, EPI_ISL_9604946, EPI_ISL_9604947, EPI_ISL_9604948, EPI_ISL_9604949, EPI_ISL_9604950, EPI_ISL_9604951, EPI_ISL_9604952, EPI_ISL_9604953, EPI_ISL_9604954, EPI_ISL_9604955, EPI_ISL_9604956, EPI_ISL_9604957, EPI_ISL_9604958, EPI_ISL_9604959, EPI_ISL_9604960, EPI_ISL_9604961, EPI_ISL_9604962, EPI_ISL_9604963, EPI_ISL_9604964, EPI_ISL_9604965, EPI_ISL_9604966, EPI_ISL_9604967, EPI_ISL_9604968, EPI_ISL_9604969, EPI_ISL_9604970, EPI_ISL_9604971, EPI_ISL_9604972, EPI_ISL_9604973, EPI_ISL_9604974, EPI_ISL_9604975, EPI_ISL_9604976, EPI_ISL_9604977, EPI_ISL_9604978, EPI_ISL_9604979, EPI_ISL_9604980, EPI_ISL_9604981, EPI_ISL_9604982, EPI_ISL_9604983, EPI_ISL_9604984, EPI_ISL_9604985, EPI_ISL_9604986, EPI_ISL_9604987, EPI_ISL_9604988, EPI_ISL_9604989, EPI_ISL_9604990, EPI_ISL_9604991, EPI_ISL_9604992, EPI_ISL_9604993, EPI_ISL_9604994, EPI_ISL_9604995, EPI_ISL_9604996, EPI_ISL_9604997, EPI_ISL_9604998, EPI_ISL_9604999, EPI_ISL_9605000, EPI_ISL_9605001, EPI_ISL_9605002, EPI_ISL_9605003, EPI_ISL_9605004, EPI_ISL_9605005, EPI_ISL_9605006, EPI_ISL_9605007, EPI_ISL_9605008, EPI_ISL_9605009, EPI_ISL_9605010, EPI_ISL_9605011, EPI_ISL_9605012, EPI_ISL_9605013, EPI_ISL_9605014, EPI_ISL_9605015, EPI_ISL_9605016, EPI_ISL_9605017, EPI_ISL_9605018, EPI_ISL_9605019, EPI_ISL_9605020, EPI_ISL_9605021, EPI_ISL_9605022, EPI_ISL_9605023, EPI_ISL_9605024, EPI_ISL_9605025, EPI_ISL_9605026, EPI_ISL_9605027, EPI_ISL_9605028, EPI_ISL_9605029, EPI_ISL_9605030, EPI_ISL_9605031, EPI_ISL_9605032, EPI_ISL_9605033, EPI_ISL_9605034, EPI_ISL_9605035, EPI_ISL_9605036, EPI_ISL_9605037, EPI_ISL_9605038, EPI_ISL_9605039, EPI_ISL_9605040, EPI_ISL_9605041, EPI_ISL_9605042, EPI_ISL_9605043, EPI_ISL_9605044, EPI_ISL_9605045, EPI_ISL_9605046, EPI_ISL_9605047, EPI_ISL_9605048, EPI_ISL_9605049, EPI_ISL_9605050, EPI_ISL_9605051, EPI_ISL_9605052, EPI_ISL_9605053, EPI_ISL_9605054, EPI_ISL_9605055, EPI_ISL_9605056, EPI_ISL_9605057, EPI_ISL_9605058, EPI_ISL_9605059, EPI_ISL_9605060, EPI_ISL_9605061, EPI_ISL_9605062, EPI_ISL_9605063, EPI_ISL_9605064, EPI_ISL_9605065, EPI_ISL_9605066, EPI_ISL_9605067, EPI_ISL_9605068, EPI_ISL_9605069, EPI_ISL_9605070, EPI_ISL_9605071, EPI_ISL_9605072, EPI_ISL_9605073, EPI_ISL_9605074, EPI_ISL_9605075, EPI_ISL_9605076, EPI_ISL_9605077, EPI_ISL_9605078, EPI_ISL_9605079, EPI_ISL_9605080, EPI_ISL_9605081, EPI_ISL_9605082, EPI_ISL_9605083, EPI_ISL_9605084, EPI_ISL_9605085, EPI_ISL_9605086, EPI_ISL_9605087, EPI_ISL_9605088, EPI_ISL_9605089, EPI_ISL_9605090, EPI_ISL_9605091, EPI_ISL_9605092, EPI_ISL_9605093, EPI_ISL_9605094, EPI_ISL_9605095, EPI_ISL_9605096, EPI_ISL_9605097, EPI_ISL_9605098, EPI_ISL_9605099, EPI_ISL_9605100, EPI_ISL_9605101, EPI_ISL_9605102, EPI_ISL_9605103, EPI_ISL_9605104, EPI_ISL_9605105, EPI_ISL_9605106, EPI_ISL_9605107, EPI_ISL_9605108, EPI_ISL_9605109, EPI_ISL_9605110, EPI_ISL_9605111, EPI_ISL_9605112, EPI_ISL_9605113, EPI_ISL_9605114, EPI_ISL_9605115, EPI_ISL_9605116, EPI_ISL_9605117, EPI_ISL_9605118, EPI_ISL_9605119, EPI_ISL_9605120, EPI_ISL_9605121, EPI_ISL_9605122, EPI_ISL_9605123, EPI_ISL_9605124, EPI_ISL_9605125, EPI_ISL_9605126, EPI_ISL_9605127, EPI_ISL_9605128, EPI_ISL_9605129, EPI_ISL_9605130, EPI_ISL_9605131, EPI_ISL_9605132, EPI_ISL_9605133, EPI_ISL_9605134, EPI_ISL_9605135, EPI_ISL_9605136, EPI_ISL_9605137, EPI_ISL_9605138, EPI_ISL_9605139, EPI_ISL_9605140, EPI_ISL_9605141, EPI_ISL_9605142, EPI_ISL_9605143, EPI_ISL_9605144, EPI_ISL_9605145, EPI_ISL_9605146, EPI_ISL_9605147, EPI_ISL_9605148, EPI_ISL_9605149, EPI_ISL_9605150, EPI_ISL_9605151, EPI_ISL_9605152, EPI_ISL_9605153, EPI_ISL_9605154, EPI_ISL_9605155, EPI_ISL_9605156, EPI_ISL_9605157, EPI_ISL_9605158, EPI_ISL_9605159, EPI_ISL_9605160, EPI_ISL_9605161, EPI_ISL_9605162, EPI_ISL_9605163, EPI_ISL_9605164, EPI_ISL_9605165, EPI_ISL_9605166, EPI_ISL_9605167, EPI_ISL_9605168, EPI_ISL_9605169, EPI_ISL_9605170, EPI_ISL_9605171, EPI_ISL_9605172, EPI_ISL_9605173, EPI_ISL_9605174, EPI_ISL_9605175, EPI_ISL_9605176, EPI_ISL_9605177, EPI_ISL_9605178, EPI_ISL_9605179, EPI_ISL_9605180, EPI_ISL_9605181, EPI_ISL_9605182, EPI_ISL_9605183, EPI_ISL_9605184, EPI_ISL_9605185, EPI_ISL_9605186, EPI_ISL_9605187, EPI_ISL_9605188, EPI_ISL_9605189, EPI_ISL_9605190, EPI_ISL_9605191, EPI_ISL_9605192, EPI_ISL_9605193, EPI_ISL_9605194, EPI_ISL_9605195, EPI_ISL_9605196, EPI_ISL_9605197, EPI_ISL_9605198, EPI_ISL_9605199, EPI_ISL_9605200, EPI_ISL_9605201, EPI_ISL_9605202, EPI_ISL_9605203, EPI_ISL_9605204, EPI_ISL_9605205, EPI_ISL_9605206, EPI_ISL_9605207, EPI_ISL_9605208, EPI_ISL_9605209, EPI_ISL_9605210, EPI_ISL_9605211, EPI_ISL_9605212, EPI_ISL_9605213, EPI_ISL_9605214, EPI_ISL_9605215, EPI_ISL_9605216, EPI_ISL_9605217, EPI_ISL_9605218, EPI_ISL_9605219, EPI_ISL_9605220, EPI_ISL_9605221, EPI_ISL_9605222, EPI_ISL_9605223, EPI_ISL_9605224, EPI_ISL_9605225, EPI_ISL_9605226, EPI_ISL_9605227, EPI_ISL_9605228, EPI_ISL_9605229, EPI_ISL_9605230, EPI_ISL_9605231, EPI_ISL_9605232, EPI_ISL_960523 |                                                                                  |                                                                                                     |                                                                                                                                                                                                                                              |



|                                                                                                                                                                                                                                                                                                                                                                                                                                                                                                                                                                                                                                                                                                                                                                                                                                                                                                                                                                                                                                                                                                                                                                                                                                                                                                                                                                                                                                                                                                                                                                                                                                                                                                                                                                                                                                                                                                                                                                                                                                                                                                                                                                                                                                                                                                                                                                                                                                                                                                                                                                                                                                                                                                                                                                                                                                                                                                                                                                                                                                                                                                                                                                                                                                                                                                                                                                                                                                                                                                                                                                                                                                                                                                                                                                                                                                                                                                                                                                                                                                                                                                                                                                                                                                                                                                                                                                                                                                                                                                                                                                                                                                                                                                                                                                                                                                                                                                                                                                                                                                                                                                                                                                                                                                                                                                                                                                                                                                                                                                                                                                                                                                                                                                                                                                                                                                                                                                                                                                                                                                                                                                                                                                                                                                                                                                                                                                                                                                                                                                                                                                                                                                                                                                                                                                                                                                                                                                                                                                                                                                                                                                                                                                                                                                                                                                                                                                                                                                                                                                                                                                                                                                                                                                                                                                                                                                                                                                                                                                                                                                                                                                                                                                                                                                                                                                                                                                                                                                                                                                                                                                                                                                                                                                                                                                                                                                                                                                                                                                                                                                                                                                                                                                                                                                                                                                                                                                                                                                                                                                                                                                                                                                                                                                                                                                                                                                                                                                                                                                                                                                                                                                                                                                                                                                                                                                                                                                                                                                                                                                                                                   | Molekylær Medicinsk Afdeling, Aarhus University Hospital, Aarhus, Denmark                            | Statens Serum Institut Bioinformatics and Microbial Genomics                                | Danish Covid-19 Genome Consortium                                                                                                                                                                                                                                                                                                                                                                                 |
|---------------------------------------------------------------------------------------------------------------------------------------------------------------------------------------------------------------------------------------------------------------------------------------------------------------------------------------------------------------------------------------------------------------------------------------------------------------------------------------------------------------------------------------------------------------------------------------------------------------------------------------------------------------------------------------------------------------------------------------------------------------------------------------------------------------------------------------------------------------------------------------------------------------------------------------------------------------------------------------------------------------------------------------------------------------------------------------------------------------------------------------------------------------------------------------------------------------------------------------------------------------------------------------------------------------------------------------------------------------------------------------------------------------------------------------------------------------------------------------------------------------------------------------------------------------------------------------------------------------------------------------------------------------------------------------------------------------------------------------------------------------------------------------------------------------------------------------------------------------------------------------------------------------------------------------------------------------------------------------------------------------------------------------------------------------------------------------------------------------------------------------------------------------------------------------------------------------------------------------------------------------------------------------------------------------------------------------------------------------------------------------------------------------------------------------------------------------------------------------------------------------------------------------------------------------------------------------------------------------------------------------------------------------------------------------------------------------------------------------------------------------------------------------------------------------------------------------------------------------------------------------------------------------------------------------------------------------------------------------------------------------------------------------------------------------------------------------------------------------------------------------------------------------------------------------------------------------------------------------------------------------------------------------------------------------------------------------------------------------------------------------------------------------------------------------------------------------------------------------------------------------------------------------------------------------------------------------------------------------------------------------------------------------------------------------------------------------------------------------------------------------------------------------------------------------------------------------------------------------------------------------------------------------------------------------------------------------------------------------------------------------------------------------------------------------------------------------------------------------------------------------------------------------------------------------------------------------------------------------------------------------------------------------------------------------------------------------------------------------------------------------------------------------------------------------------------------------------------------------------------------------------------------------------------------------------------------------------------------------------------------------------------------------------------------------------------------------------------------------------------------------------------------------------------------------------------------------------------------------------------------------------------------------------------------------------------------------------------------------------------------------------------------------------------------------------------------------------------------------------------------------------------------------------------------------------------------------------------------------------------------------------------------------------------------------------------------------------------------------------------------------------------------------------------------------------------------------------------------------------------------------------------------------------------------------------------------------------------------------------------------------------------------------------------------------------------------------------------------------------------------------------------------------------------------------------------------------------------------------------------------------------------------------------------------------------------------------------------------------------------------------------------------------------------------------------------------------------------------------------------------------------------------------------------------------------------------------------------------------------------------------------------------------------------------------------------------------------------------------------------------------------------------------------------------------------------------------------------------------------------------------------------------------------------------------------------------------------------------------------------------------------------------------------------------------------------------------------------------------------------------------------------------------------------------------------------------------------------------------------------------------------------------------------------------------------------------------------------------------------------------------------------------------------------------------------------------------------------------------------------------------------------------------------------------------------------------------------------------------------------------------------------------------------------------------------------------------------------------------------------------------------------------------------------------------------------------------------------------------------------------------------------------------------------------------------------------------------------------------------------------------------------------------------------------------------------------------------------------------------------------------------------------------------------------------------------------------------------------------------------------------------------------------------------------------------------------------------------------------------------------------------------------------------------------------------------------------------------------------------------------------------------------------------------------------------------------------------------------------------------------------------------------------------------------------------------------------------------------------------------------------------------------------------------------------------------------------------------------------------------------------------------------------------------------------------------------------------------------------------------------------------------------------------------------------------------------------------------------------------------------------------------------------------------------------------------------------------------------------------------------------------------------------------------------------------------------------------------------------------------------------------------------------------------------------------------------------------------------------------------------------------------------------------------------------------------------------------------------------------------------------------------------------------------------------------------------------------------------------------------------------------------------------------------------------------------------------------------------------------------------------------------------------------------------------------------------------------------------------------------------------------------------------------------------------------------------------------------------------------------------------------------------------------------------------------------------------------------------------------------------------------------------------------------------------------------------------------------------------------------------------------------------------------------------------------------------------------------------------------------------------------------------------------------------------------------------------------------------------------------------------------------------------------------------------------------------------------------------------------------------------------------------------------------------------------------------------------------------------------------------------------------------------------------|------------------------------------------------------------------------------------------------------|---------------------------------------------------------------------------------------------|-------------------------------------------------------------------------------------------------------------------------------------------------------------------------------------------------------------------------------------------------------------------------------------------------------------------------------------------------------------------------------------------------------------------|
| see above                                                                                                                                                                                                                                                                                                                                                                                                                                                                                                                                                                                                                                                                                                                                                                                                                                                                                                                                                                                                                                                                                                                                                                                                                                                                                                                                                                                                                                                                                                                                                                                                                                                                                                                                                                                                                                                                                                                                                                                                                                                                                                                                                                                                                                                                                                                                                                                                                                                                                                                                                                                                                                                                                                                                                                                                                                                                                                                                                                                                                                                                                                                                                                                                                                                                                                                                                                                                                                                                                                                                                                                                                                                                                                                                                                                                                                                                                                                                                                                                                                                                                                                                                                                                                                                                                                                                                                                                                                                                                                                                                                                                                                                                                                                                                                                                                                                                                                                                                                                                                                                                                                                                                                                                                                                                                                                                                                                                                                                                                                                                                                                                                                                                                                                                                                                                                                                                                                                                                                                                                                                                                                                                                                                                                                                                                                                                                                                                                                                                                                                                                                                                                                                                                                                                                                                                                                                                                                                                                                                                                                                                                                                                                                                                                                                                                                                                                                                                                                                                                                                                                                                                                                                                                                                                                                                                                                                                                                                                                                                                                                                                                                                                                                                                                                                                                                                                                                                                                                                                                                                                                                                                                                                                                                                                                                                                                                                                                                                                                                                                                                                                                                                                                                                                                                                                                                                                                                                                                                                                                                                                                                                                                                                                                                                                                                                                                                                                                                                                                                                                                                                                                                                                                                                                                                                                                                                                                                                                                                                                                                                                         |                                                                                                      |                                                                                             |                                                                                                                                                                                                                                                                                                                                                                                                                   |
| EPI_ISL_9710386, EPI_ISL_9710405                                                                                                                                                                                                                                                                                                                                                                                                                                                                                                                                                                                                                                                                                                                                                                                                                                                                                                                                                                                                                                                                                                                                                                                                                                                                                                                                                                                                                                                                                                                                                                                                                                                                                                                                                                                                                                                                                                                                                                                                                                                                                                                                                                                                                                                                                                                                                                                                                                                                                                                                                                                                                                                                                                                                                                                                                                                                                                                                                                                                                                                                                                                                                                                                                                                                                                                                                                                                                                                                                                                                                                                                                                                                                                                                                                                                                                                                                                                                                                                                                                                                                                                                                                                                                                                                                                                                                                                                                                                                                                                                                                                                                                                                                                                                                                                                                                                                                                                                                                                                                                                                                                                                                                                                                                                                                                                                                                                                                                                                                                                                                                                                                                                                                                                                                                                                                                                                                                                                                                                                                                                                                                                                                                                                                                                                                                                                                                                                                                                                                                                                                                                                                                                                                                                                                                                                                                                                                                                                                                                                                                                                                                                                                                                                                                                                                                                                                                                                                                                                                                                                                                                                                                                                                                                                                                                                                                                                                                                                                                                                                                                                                                                                                                                                                                                                                                                                                                                                                                                                                                                                                                                                                                                                                                                                                                                                                                                                                                                                                                                                                                                                                                                                                                                                                                                                                                                                                                                                                                                                                                                                                                                                                                                                                                                                                                                                                                                                                                                                                                                                                                                                                                                                                                                                                                                                                                                                                                                                                                                                                                                  | NYU Langone Health                                                                                   | Departments of Pathology and Medicine, New York University School of Medicine               | Adriana Heguy; Christian Marier; Dacia Dimartino; Emily Guzman; Gael Westby; Guiqing Wang; Paul Zappile; Peter Meyn; Sitharam Ramaswami; Yutong Zhang                                                                                                                                                                                                                                                             |
| EPI_ISL_9417987, EPI_ISL_9418000, EPI_ISL_9418032, EPI_ISL_9515409                                                                                                                                                                                                                                                                                                                                                                                                                                                                                                                                                                                                                                                                                                                                                                                                                                                                                                                                                                                                                                                                                                                                                                                                                                                                                                                                                                                                                                                                                                                                                                                                                                                                                                                                                                                                                                                                                                                                                                                                                                                                                                                                                                                                                                                                                                                                                                                                                                                                                                                                                                                                                                                                                                                                                                                                                                                                                                                                                                                                                                                                                                                                                                                                                                                                                                                                                                                                                                                                                                                                                                                                                                                                                                                                                                                                                                                                                                                                                                                                                                                                                                                                                                                                                                                                                                                                                                                                                                                                                                                                                                                                                                                                                                                                                                                                                                                                                                                                                                                                                                                                                                                                                                                                                                                                                                                                                                                                                                                                                                                                                                                                                                                                                                                                                                                                                                                                                                                                                                                                                                                                                                                                                                                                                                                                                                                                                                                                                                                                                                                                                                                                                                                                                                                                                                                                                                                                                                                                                                                                                                                                                                                                                                                                                                                                                                                                                                                                                                                                                                                                                                                                                                                                                                                                                                                                                                                                                                                                                                                                                                                                                                                                                                                                                                                                                                                                                                                                                                                                                                                                                                                                                                                                                                                                                                                                                                                                                                                                                                                                                                                                                                                                                                                                                                                                                                                                                                                                                                                                                                                                                                                                                                                                                                                                                                                                                                                                                                                                                                                                                                                                                                                                                                                                                                                                                                                                                                                                                                                                                | Narodowy Instytut Zdrowia Publicznego - PZH                                                          | WSSE w Warszawie                                                                            | Dorota Wagrocka - Rocznik                                                                                                                                                                                                                                                                                                                                                                                         |
| EPI_ISL_9696480, EPI_ISL_9696482, EPI_ISL_9696483, EPI_ISL_9696484, EPI_ISL_9696485, EPI_ISL_9696486, EPI_ISL_9696487, EPI_ISL_9696488, EPI_ISL_9696492, EPI_ISL_9696493, EPI_ISL_9696495, EPI_ISL_9696496, EPI_ISL_9696497, EPI_ISL_9696498, EPI_ISL_9696500, EPI_ISL_9696502, EPI_ISL_9696503, EPI_ISL_9696504, EPI_ISL_9696508, EPI_ISL_9696510, EPI_ISL_9696512, EPI_ISL_9696514, EPI_ISL_9696516, EPI_ISL_9696517, EPI_ISL_9696518, EPI_ISL_9696519, EPI_ISL_9696521, EPI_ISL_9696539, EPI_ISL_9696540, EPI_ISL_9696541, EPI_ISL_9696542, EPI_ISL_9696543, EPI_ISL_9696544, EPI_ISL_9696545, EPI_ISL_9696547, EPI_ISL_9696548                                                                                                                                                                                                                                                                                                                                                                                                                                                                                                                                                                                                                                                                                                                                                                                                                                                                                                                                                                                                                                                                                                                                                                                                                                                                                                                                                                                                                                                                                                                                                                                                                                                                                                                                                                                                                                                                                                                                                                                                                                                                                                                                                                                                                                                                                                                                                                                                                                                                                                                                                                                                                                                                                                                                                                                                                                                                                                                                                                                                                                                                                                                                                                                                                                                                                                                                                                                                                                                                                                                                                                                                                                                                                                                                                                                                                                                                                                                                                                                                                                                                                                                                                                                                                                                                                                                                                                                                                                                                                                                                                                                                                                                                                                                                                                                                                                                                                                                                                                                                                                                                                                                                                                                                                                                                                                                                                                                                                                                                                                                                                                                                                                                                                                                                                                                                                                                                                                                                                                                                                                                                                                                                                                                                                                                                                                                                                                                                                                                                                                                                                                                                                                                                                                                                                                                                                                                                                                                                                                                                                                                                                                                                                                                                                                                                                                                                                                                                                                                                                                                                                                                                                                                                                                                                                                                                                                                                                                                                                                                                                                                                                                                                                                                                                                                                                                                                                                                                                                                                                                                                                                                                                                                                                                                                                                                                                                                                                                                                                                                                                                                                                                                                                                                                                                                                                                                                                                                                                                                                                                                                                                                                                                                                                                                                                                                                                                                                                                                |                                                                                                      |                                                                                             |                                                                                                                                                                                                                                                                                                                                                                                                                   |
| see above                                                                                                                                                                                                                                                                                                                                                                                                                                                                                                                                                                                                                                                                                                                                                                                                                                                                                                                                                                                                                                                                                                                                                                                                                                                                                                                                                                                                                                                                                                                                                                                                                                                                                                                                                                                                                                                                                                                                                                                                                                                                                                                                                                                                                                                                                                                                                                                                                                                                                                                                                                                                                                                                                                                                                                                                                                                                                                                                                                                                                                                                                                                                                                                                                                                                                                                                                                                                                                                                                                                                                                                                                                                                                                                                                                                                                                                                                                                                                                                                                                                                                                                                                                                                                                                                                                                                                                                                                                                                                                                                                                                                                                                                                                                                                                                                                                                                                                                                                                                                                                                                                                                                                                                                                                                                                                                                                                                                                                                                                                                                                                                                                                                                                                                                                                                                                                                                                                                                                                                                                                                                                                                                                                                                                                                                                                                                                                                                                                                                                                                                                                                                                                                                                                                                                                                                                                                                                                                                                                                                                                                                                                                                                                                                                                                                                                                                                                                                                                                                                                                                                                                                                                                                                                                                                                                                                                                                                                                                                                                                                                                                                                                                                                                                                                                                                                                                                                                                                                                                                                                                                                                                                                                                                                                                                                                                                                                                                                                                                                                                                                                                                                                                                                                                                                                                                                                                                                                                                                                                                                                                                                                                                                                                                                                                                                                                                                                                                                                                                                                                                                                                                                                                                                                                                                                                                                                                                                                                                                                                                                                                         | National Institute of Public Health                                                                  | Virology Unit, Institut Pasteur du Cambodge                                                 | Cecile Troupin; Chau Darapeah; Chin Savuth; Erik A Karlsson; Jurry Y Siegers; Kraing Sidonn; Leakhena Pum; Ly Sovann; Sophoannadeth Rath; Veasna Duong; Yi Sengdeourm                                                                                                                                                                                                                                             |
| EPI_ISL_9773754, EPI_ISL_9773762, EPI_ISL_9773763                                                                                                                                                                                                                                                                                                                                                                                                                                                                                                                                                                                                                                                                                                                                                                                                                                                                                                                                                                                                                                                                                                                                                                                                                                                                                                                                                                                                                                                                                                                                                                                                                                                                                                                                                                                                                                                                                                                                                                                                                                                                                                                                                                                                                                                                                                                                                                                                                                                                                                                                                                                                                                                                                                                                                                                                                                                                                                                                                                                                                                                                                                                                                                                                                                                                                                                                                                                                                                                                                                                                                                                                                                                                                                                                                                                                                                                                                                                                                                                                                                                                                                                                                                                                                                                                                                                                                                                                                                                                                                                                                                                                                                                                                                                                                                                                                                                                                                                                                                                                                                                                                                                                                                                                                                                                                                                                                                                                                                                                                                                                                                                                                                                                                                                                                                                                                                                                                                                                                                                                                                                                                                                                                                                                                                                                                                                                                                                                                                                                                                                                                                                                                                                                                                                                                                                                                                                                                                                                                                                                                                                                                                                                                                                                                                                                                                                                                                                                                                                                                                                                                                                                                                                                                                                                                                                                                                                                                                                                                                                                                                                                                                                                                                                                                                                                                                                                                                                                                                                                                                                                                                                                                                                                                                                                                                                                                                                                                                                                                                                                                                                                                                                                                                                                                                                                                                                                                                                                                                                                                                                                                                                                                                                                                                                                                                                                                                                                                                                                                                                                                                                                                                                                                                                                                                                                                                                                                                                                                                                                                                 | National Platform bis COVID ULB-IBC                                                                  | National Platform bis COVID ULB-IBC                                                         | Arnaud Marchant; Benoit Haerlingen; Coralie Henin; Marie-Luce Delforge; Ricardo De Mendonça                                                                                                                                                                                                                                                                                                                       |
| EPI_ISL_9741347, EPI_ISL_9741349, EPI_ISL_9741350                                                                                                                                                                                                                                                                                                                                                                                                                                                                                                                                                                                                                                                                                                                                                                                                                                                                                                                                                                                                                                                                                                                                                                                                                                                                                                                                                                                                                                                                                                                                                                                                                                                                                                                                                                                                                                                                                                                                                                                                                                                                                                                                                                                                                                                                                                                                                                                                                                                                                                                                                                                                                                                                                                                                                                                                                                                                                                                                                                                                                                                                                                                                                                                                                                                                                                                                                                                                                                                                                                                                                                                                                                                                                                                                                                                                                                                                                                                                                                                                                                                                                                                                                                                                                                                                                                                                                                                                                                                                                                                                                                                                                                                                                                                                                                                                                                                                                                                                                                                                                                                                                                                                                                                                                                                                                                                                                                                                                                                                                                                                                                                                                                                                                                                                                                                                                                                                                                                                                                                                                                                                                                                                                                                                                                                                                                                                                                                                                                                                                                                                                                                                                                                                                                                                                                                                                                                                                                                                                                                                                                                                                                                                                                                                                                                                                                                                                                                                                                                                                                                                                                                                                                                                                                                                                                                                                                                                                                                                                                                                                                                                                                                                                                                                                                                                                                                                                                                                                                                                                                                                                                                                                                                                                                                                                                                                                                                                                                                                                                                                                                                                                                                                                                                                                                                                                                                                                                                                                                                                                                                                                                                                                                                                                                                                                                                                                                                                                                                                                                                                                                                                                                                                                                                                                                                                                                                                                                                                                                                                                                 | National Platform bis UMONS/Jolimont                                                                 | National Platform bis UMONS/Jolimont                                                        | Eric Tarantino; Florian Juszczak; Gautier Detry; Guillaume Bayon-Vicente; Laetitia Gheysen; Ruddy Wattiez                                                                                                                                                                                                                                                                                                         |
| EPI_ISL_9596876, EPI_ISL_9596877, EPI_ISL_9596878, EPI_ISL_9596879, EPI_ISL_9596880, EPI_ISL_9596881, EPI_ISL_9596882, EPI_ISL_9596883, EPI_ISL_9596884, EPI_ISL_9596885, EPI_ISL_9596886, EPI_ISL_9596887, EPI_ISL_9596888, EPI_ISL_9596889, EPI_ISL_9596890, EPI_ISL_9596891, EPI_ISL_9596892, EPI_ISL_9596893, EPI_ISL_9596894, EPI_ISL_9596895, EPI_ISL_9596896, EPI_ISL_9596897, EPI_ISL_9596898, EPI_ISL_9596899, EPI_ISL_9596900, EPI_ISL_9596901, EPI_ISL_9596902, EPI_ISL_9596903, EPI_ISL_9596904, EPI_ISL_9596905, EPI_ISL_9596910                                                                                                                                                                                                                                                                                                                                                                                                                                                                                                                                                                                                                                                                                                                                                                                                                                                                                                                                                                                                                                                                                                                                                                                                                                                                                                                                                                                                                                                                                                                                                                                                                                                                                                                                                                                                                                                                                                                                                                                                                                                                                                                                                                                                                                                                                                                                                                                                                                                                                                                                                                                                                                                                                                                                                                                                                                                                                                                                                                                                                                                                                                                                                                                                                                                                                                                                                                                                                                                                                                                                                                                                                                                                                                                                                                                                                                                                                                                                                                                                                                                                                                                                                                                                                                                                                                                                                                                                                                                                                                                                                                                                                                                                                                                                                                                                                                                                                                                                                                                                                                                                                                                                                                                                                                                                                                                                                                                                                                                                                                                                                                                                                                                                                                                                                                                                                                                                                                                                                                                                                                                                                                                                                                                                                                                                                                                                                                                                                                                                                                                                                                                                                                                                                                                                                                                                                                                                                                                                                                                                                                                                                                                                                                                                                                                                                                                                                                                                                                                                                                                                                                                                                                                                                                                                                                                                                                                                                                                                                                                                                                                                                                                                                                                                                                                                                                                                                                                                                                                                                                                                                                                                                                                                                                                                                                                                                                                                                                                                                                                                                                                                                                                                                                                                                                                                                                                                                                                                                                                                                                                                                                                                                                                                                                                                                                                                                                                                                                                                                                                                     |                                                                                                      |                                                                                             |                                                                                                                                                                                                                                                                                                                                                                                                                   |
| see above                                                                                                                                                                                                                                                                                                                                                                                                                                                                                                                                                                                                                                                                                                                                                                                                                                                                                                                                                                                                                                                                                                                                                                                                                                                                                                                                                                                                                                                                                                                                                                                                                                                                                                                                                                                                                                                                                                                                                                                                                                                                                                                                                                                                                                                                                                                                                                                                                                                                                                                                                                                                                                                                                                                                                                                                                                                                                                                                                                                                                                                                                                                                                                                                                                                                                                                                                                                                                                                                                                                                                                                                                                                                                                                                                                                                                                                                                                                                                                                                                                                                                                                                                                                                                                                                                                                                                                                                                                                                                                                                                                                                                                                                                                                                                                                                                                                                                                                                                                                                                                                                                                                                                                                                                                                                                                                                                                                                                                                                                                                                                                                                                                                                                                                                                                                                                                                                                                                                                                                                                                                                                                                                                                                                                                                                                                                                                                                                                                                                                                                                                                                                                                                                                                                                                                                                                                                                                                                                                                                                                                                                                                                                                                                                                                                                                                                                                                                                                                                                                                                                                                                                                                                                                                                                                                                                                                                                                                                                                                                                                                                                                                                                                                                                                                                                                                                                                                                                                                                                                                                                                                                                                                                                                                                                                                                                                                                                                                                                                                                                                                                                                                                                                                                                                                                                                                                                                                                                                                                                                                                                                                                                                                                                                                                                                                                                                                                                                                                                                                                                                                                                                                                                                                                                                                                                                                                                                                                                                                                                                                                                         | National Public Health Laboratory, National Centre for Infectious Diseases                           | National Public Health Laboratory, National Centre for Infectious Diseases                  | Benny Yeo; Grace Ngan; Lin Cui; Raymond Tzer Pin Lin; Royce Ang; Samuel Loo; Yichen Ding; Zhenyang Zhou                                                                                                                                                                                                                                                                                                           |
| EPI_ISL_9630590                                                                                                                                                                                                                                                                                                                                                                                                                                                                                                                                                                                                                                                                                                                                                                                                                                                                                                                                                                                                                                                                                                                                                                                                                                                                                                                                                                                                                                                                                                                                                                                                                                                                                                                                                                                                                                                                                                                                                                                                                                                                                                                                                                                                                                                                                                                                                                                                                                                                                                                                                                                                                                                                                                                                                                                                                                                                                                                                                                                                                                                                                                                                                                                                                                                                                                                                                                                                                                                                                                                                                                                                                                                                                                                                                                                                                                                                                                                                                                                                                                                                                                                                                                                                                                                                                                                                                                                                                                                                                                                                                                                                                                                                                                                                                                                                                                                                                                                                                                                                                                                                                                                                                                                                                                                                                                                                                                                                                                                                                                                                                                                                                                                                                                                                                                                                                                                                                                                                                                                                                                                                                                                                                                                                                                                                                                                                                                                                                                                                                                                                                                                                                                                                                                                                                                                                                                                                                                                                                                                                                                                                                                                                                                                                                                                                                                                                                                                                                                                                                                                                                                                                                                                                                                                                                                                                                                                                                                                                                                                                                                                                                                                                                                                                                                                                                                                                                                                                                                                                                                                                                                                                                                                                                                                                                                                                                                                                                                                                                                                                                                                                                                                                                                                                                                                                                                                                                                                                                                                                                                                                                                                                                                                                                                                                                                                                                                                                                                                                                                                                                                                                                                                                                                                                                                                                                                                                                                                                                                                                                                                                   | North Dakota Department of Health, Public Health Laboratory                                          | North Dakota Department of Health, Public Health Laboratory                                 | Lisa Wingerter                                                                                                                                                                                                                                                                                                                                                                                                    |
| EPI_ISL_9596516, EPI_ISL_9596517                                                                                                                                                                                                                                                                                                                                                                                                                                                                                                                                                                                                                                                                                                                                                                                                                                                                                                                                                                                                                                                                                                                                                                                                                                                                                                                                                                                                                                                                                                                                                                                                                                                                                                                                                                                                                                                                                                                                                                                                                                                                                                                                                                                                                                                                                                                                                                                                                                                                                                                                                                                                                                                                                                                                                                                                                                                                                                                                                                                                                                                                                                                                                                                                                                                                                                                                                                                                                                                                                                                                                                                                                                                                                                                                                                                                                                                                                                                                                                                                                                                                                                                                                                                                                                                                                                                                                                                                                                                                                                                                                                                                                                                                                                                                                                                                                                                                                                                                                                                                                                                                                                                                                                                                                                                                                                                                                                                                                                                                                                                                                                                                                                                                                                                                                                                                                                                                                                                                                                                                                                                                                                                                                                                                                                                                                                                                                                                                                                                                                                                                                                                                                                                                                                                                                                                                                                                                                                                                                                                                                                                                                                                                                                                                                                                                                                                                                                                                                                                                                                                                                                                                                                                                                                                                                                                                                                                                                                                                                                                                                                                                                                                                                                                                                                                                                                                                                                                                                                                                                                                                                                                                                                                                                                                                                                                                                                                                                                                                                                                                                                                                                                                                                                                                                                                                                                                                                                                                                                                                                                                                                                                                                                                                                                                                                                                                                                                                                                                                                                                                                                                                                                                                                                                                                                                                                                                                                                                                                                                                                                                  | North Lantau Hospital                                                                                | Hong Kong Department of Health                                                              | Alan K.L. Tsang; Edman T.K. Lam; Ken H.L. Ng; Patricia K. L. Leung; Peter C.W. Yip; Rickjason C.W. Chan                                                                                                                                                                                                                                                                                                           |
| EPI_ISL_9775270                                                                                                                                                                                                                                                                                                                                                                                                                                                                                                                                                                                                                                                                                                                                                                                                                                                                                                                                                                                                                                                                                                                                                                                                                                                                                                                                                                                                                                                                                                                                                                                                                                                                                                                                                                                                                                                                                                                                                                                                                                                                                                                                                                                                                                                                                                                                                                                                                                                                                                                                                                                                                                                                                                                                                                                                                                                                                                                                                                                                                                                                                                                                                                                                                                                                                                                                                                                                                                                                                                                                                                                                                                                                                                                                                                                                                                                                                                                                                                                                                                                                                                                                                                                                                                                                                                                                                                                                                                                                                                                                                                                                                                                                                                                                                                                                                                                                                                                                                                                                                                                                                                                                                                                                                                                                                                                                                                                                                                                                                                                                                                                                                                                                                                                                                                                                                                                                                                                                                                                                                                                                                                                                                                                                                                                                                                                                                                                                                                                                                                                                                                                                                                                                                                                                                                                                                                                                                                                                                                                                                                                                                                                                                                                                                                                                                                                                                                                                                                                                                                                                                                                                                                                                                                                                                                                                                                                                                                                                                                                                                                                                                                                                                                                                                                                                                                                                                                                                                                                                                                                                                                                                                                                                                                                                                                                                                                                                                                                                                                                                                                                                                                                                                                                                                                                                                                                                                                                                                                                                                                                                                                                                                                                                                                                                                                                                                                                                                                                                                                                                                                                                                                                                                                                                                                                                                                                                                                                                                                                                                                                                   | Northstar Pathology Laboratory, Ahmedabad                                                            | Gujarat Biotechnology Research Centre                                                       | Akhilesh Modi; Apurvasinh Puvar; Bhadrshsinh Gohil; Chaitanya Joshi; Disha Vora; Janvi Raval; Jaykumar Rangani; Kanupriya; Madhvi Joshi; Nimesh Patel; Nitin Savaliya; NitinShukla; Priyank Chavda; Ramesh Pandit; Roshani Mishra; Sonal Sharma; Tasnim Trivedi; Zarna Patel                                                                                                                                      |
| EPI_ISL_9752557, EPI_ISL_9752558, EPI_ISL_9752559, EPI_ISL_9752560, EPI_ISL_9752561, EPI_ISL_9752565, EPI_ISL_9752566, EPI_ISL_9752567                                                                                                                                                                                                                                                                                                                                                                                                                                                                                                                                                                                                                                                                                                                                                                                                                                                                                                                                                                                                                                                                                                                                                                                                                                                                                                                                                                                                                                                                                                                                                                                                                                                                                                                                                                                                                                                                                                                                                                                                                                                                                                                                                                                                                                                                                                                                                                                                                                                                                                                                                                                                                                                                                                                                                                                                                                                                                                                                                                                                                                                                                                                                                                                                                                                                                                                                                                                                                                                                                                                                                                                                                                                                                                                                                                                                                                                                                                                                                                                                                                                                                                                                                                                                                                                                                                                                                                                                                                                                                                                                                                                                                                                                                                                                                                                                                                                                                                                                                                                                                                                                                                                                                                                                                                                                                                                                                                                                                                                                                                                                                                                                                                                                                                                                                                                                                                                                                                                                                                                                                                                                                                                                                                                                                                                                                                                                                                                                                                                                                                                                                                                                                                                                                                                                                                                                                                                                                                                                                                                                                                                                                                                                                                                                                                                                                                                                                                                                                                                                                                                                                                                                                                                                                                                                                                                                                                                                                                                                                                                                                                                                                                                                                                                                                                                                                                                                                                                                                                                                                                                                                                                                                                                                                                                                                                                                                                                                                                                                                                                                                                                                                                                                                                                                                                                                                                                                                                                                                                                                                                                                                                                                                                                                                                                                                                                                                                                                                                                                                                                                                                                                                                                                                                                                                                                                                                                                                                                                            |                                                                                                      | Orebro University Hospital                                                                  | Sundqvist M et al                                                                                                                                                                                                                                                                                                                                                                                                 |
| see above                                                                                                                                                                                                                                                                                                                                                                                                                                                                                                                                                                                                                                                                                                                                                                                                                                                                                                                                                                                                                                                                                                                                                                                                                                                                                                                                                                                                                                                                                                                                                                                                                                                                                                                                                                                                                                                                                                                                                                                                                                                                                                                                                                                                                                                                                                                                                                                                                                                                                                                                                                                                                                                                                                                                                                                                                                                                                                                                                                                                                                                                                                                                                                                                                                                                                                                                                                                                                                                                                                                                                                                                                                                                                                                                                                                                                                                                                                                                                                                                                                                                                                                                                                                                                                                                                                                                                                                                                                                                                                                                                                                                                                                                                                                                                                                                                                                                                                                                                                                                                                                                                                                                                                                                                                                                                                                                                                                                                                                                                                                                                                                                                                                                                                                                                                                                                                                                                                                                                                                                                                                                                                                                                                                                                                                                                                                                                                                                                                                                                                                                                                                                                                                                                                                                                                                                                                                                                                                                                                                                                                                                                                                                                                                                                                                                                                                                                                                                                                                                                                                                                                                                                                                                                                                                                                                                                                                                                                                                                                                                                                                                                                                                                                                                                                                                                                                                                                                                                                                                                                                                                                                                                                                                                                                                                                                                                                                                                                                                                                                                                                                                                                                                                                                                                                                                                                                                                                                                                                                                                                                                                                                                                                                                                                                                                                                                                                                                                                                                                                                                                                                                                                                                                                                                                                                                                                                                                                                                                                                                                                                                         | Orebro University Hospital, Dept Laboratory Medicine, Clinical Microbiology                          |                                                                                             |                                                                                                                                                                                                                                                                                                                                                                                                                   |
| EPI_ISL_9710482                                                                                                                                                                                                                                                                                                                                                                                                                                                                                                                                                                                                                                                                                                                                                                                                                                                                                                                                                                                                                                                                                                                                                                                                                                                                                                                                                                                                                                                                                                                                                                                                                                                                                                                                                                                                                                                                                                                                                                                                                                                                                                                                                                                                                                                                                                                                                                                                                                                                                                                                                                                                                                                                                                                                                                                                                                                                                                                                                                                                                                                                                                                                                                                                                                                                                                                                                                                                                                                                                                                                                                                                                                                                                                                                                                                                                                                                                                                                                                                                                                                                                                                                                                                                                                                                                                                                                                                                                                                                                                                                                                                                                                                                                                                                                                                                                                                                                                                                                                                                                                                                                                                                                                                                                                                                                                                                                                                                                                                                                                                                                                                                                                                                                                                                                                                                                                                                                                                                                                                                                                                                                                                                                                                                                                                                                                                                                                                                                                                                                                                                                                                                                                                                                                                                                                                                                                                                                                                                                                                                                                                                                                                                                                                                                                                                                                                                                                                                                                                                                                                                                                                                                                                                                                                                                                                                                                                                                                                                                                                                                                                                                                                                                                                                                                                                                                                                                                                                                                                                                                                                                                                                                                                                                                                                                                                                                                                                                                                                                                                                                                                                                                                                                                                                                                                                                                                                                                                                                                                                                                                                                                                                                                                                                                                                                                                                                                                                                                                                                                                                                                                                                                                                                                                                                                                                                                                                                                                                                                                                                                                                   | Oregon State Public Health Laboratory                                                                | Oregon State Public Health Laboratory                                                       | Eugene Yeobach; John Fontana and Shane Sevey; Laura Tsaknaridis; Macey Henning; Rafia Razaque; Vanda Makris                                                                                                                                                                                                                                                                                                       |
| EPI_ISL_9681734, EPI_ISL_9681743, EPI_ISL_9681749, EPI_ISL_9747209, EPI_ISL_9747210, EPI_ISL_9747211, EPI_ISL_9747212, EPI_ISL_9747213, EPI_ISL_9747214, EPI_ISL_9747215, EPI_ISL_9747216, EPI_ISL_9747217, EPI_ISL_9747218, EPI_ISL_9747219, EPI_ISL_9747220, EPI_ISL_9747221, EPI_ISL_9747222, EPI_ISL_9747223, EPI_ISL_9747224, EPI_ISL_9747225, EPI_ISL_9747226, EPI_ISL_9747227, EPI_ISL_9747228, EPI_ISL_9747229, EPI_ISL_9747230, EPI_ISL_9747231, EPI_ISL_9747232, EPI_ISL_9747233, EPI_ISL_9747234, EPI_ISL_9747235, EPI_ISL_9747236, EPI_ISL_9747237, EPI_ISL_9747238, EPI_ISL_9747239, EPI_ISL_9747240, EPI_ISL_9747241, EPI_ISL_9747242, EPI_ISL_9747243, EPI_ISL_9747244, EPI_ISL_9747245, EPI_ISL_9747246, EPI_ISL_9747247, EPI_ISL_9747248, EPI_ISL_9747249, EPI_ISL_9747250, EPI_ISL_9747251, EPI_ISL_9747252, EPI_ISL_9747253, EPI_ISL_9747254, EPI_ISL_9747255, EPI_ISL_9747256, EPI_ISL_9747257, EPI_ISL_9747258, EPI_ISL_9747259                                                                                                                                                                                                                                                                                                                                                                                                                                                                                                                                                                                                                                                                                                                                                                                                                                                                                                                                                                                                                                                                                                                                                                                                                                                                                                                                                                                                                                                                                                                                                                                                                                                                                                                                                                                                                                                                                                                                                                                                                                                                                                                                                                                                                                                                                                                                                                                                                                                                                                                                                                                                                                                                                                                                                                                                                                                                                                                                                                                                                                                                                                                                                                                                                                                                                                                                                                                                                                                                                                                                                                                                                                                                                                                                                                                                                                                                                                                                                                                                                                                                                                                                                                                                                                                                                                                                                                                                                                                                                                                                                                                                                                                                                                                                                                                                                                                                                                                                                                                                                                                                                                                                                                                                                                                                                                                                                                                                                                                                                                                                                                                                                                                                                                                                                                                                                                                                                                                                                                                                                                                                                                                                                                                                                                                                                                                                                                                                                                                                                                                                                                                                                                                                                                                                                                                                                                                                                                                                                                                                                                                                                                                                                                                                                                                                                                                                                                                                                                                                                                                                                                                                                                                                                                                                                                                                                                                                                                                                                                                                                                                                                                                                                                                                                                                                                                                                                                                                                                                                                                                                                                                                                                                                                                                                                                                                                                                                                                                                                                                                                                                                                                                                                                                                                                                                                                                                                                                                                                                                                                                                                                                              |                                                                                                      |                                                                                             |                                                                                                                                                                                                                                                                                                                                                                                                                   |
| see above                                                                                                                                                                                                                                                                                                                                                                                                                                                                                                                                                                                                                                                                                                                                                                                                                                                                                                                                                                                                                                                                                                                                                                                                                                                                                                                                                                                                                                                                                                                                                                                                                                                                                                                                                                                                                                                                                                                                                                                                                                                                                                                                                                                                                                                                                                                                                                                                                                                                                                                                                                                                                                                                                                                                                                                                                                                                                                                                                                                                                                                                                                                                                                                                                                                                                                                                                                                                                                                                                                                                                                                                                                                                                                                                                                                                                                                                                                                                                                                                                                                                                                                                                                                                                                                                                                                                                                                                                                                                                                                                                                                                                                                                                                                                                                                                                                                                                                                                                                                                                                                                                                                                                                                                                                                                                                                                                                                                                                                                                                                                                                                                                                                                                                                                                                                                                                                                                                                                                                                                                                                                                                                                                                                                                                                                                                                                                                                                                                                                                                                                                                                                                                                                                                                                                                                                                                                                                                                                                                                                                                                                                                                                                                                                                                                                                                                                                                                                                                                                                                                                                                                                                                                                                                                                                                                                                                                                                                                                                                                                                                                                                                                                                                                                                                                                                                                                                                                                                                                                                                                                                                                                                                                                                                                                                                                                                                                                                                                                                                                                                                                                                                                                                                                                                                                                                                                                                                                                                                                                                                                                                                                                                                                                                                                                                                                                                                                                                                                                                                                                                                                                                                                                                                                                                                                                                                                                                                                                                                                                                                                                         | Oslo University Hospital, Department of Microbiology                                                 | Norwegian Institute of Public Health, Department of Virology                                | Arvind Yegambaram Meenakshi Sundaram; Cathrine Fladeby; Garcia Lorente Ignacio; Gregor D. Gillilan; Hilde Elshaug; Hilde Vollan; Jan Bråte; Kamilla Heddeland Instefjord; Karoline Bragstad; Kathrine Stene-Johansen; Line Victoria Moen; Lise Andresen; Mariann Nilssen; Mona Holberg-Petersen; Olav Hungenes; Pedersen Benedikte Nevjen; Pål Marius Bjørnstad; Rasmus Riis Kopperud; Teodora Plamenova Ribarska |
| EPI_ISL_9522922                                                                                                                                                                                                                                                                                                                                                                                                                                                                                                                                                                                                                                                                                                                                                                                                                                                                                                                                                                                                                                                                                                                                                                                                                                                                                                                                                                                                                                                                                                                                                                                                                                                                                                                                                                                                                                                                                                                                                                                                                                                                                                                                                                                                                                                                                                                                                                                                                                                                                                                                                                                                                                                                                                                                                                                                                                                                                                                                                                                                                                                                                                                                                                                                                                                                                                                                                                                                                                                                                                                                                                                                                                                                                                                                                                                                                                                                                                                                                                                                                                                                                                                                                                                                                                                                                                                                                                                                                                                                                                                                                                                                                                                                                                                                                                                                                                                                                                                                                                                                                                                                                                                                                                                                                                                                                                                                                                                                                                                                                                                                                                                                                                                                                                                                                                                                                                                                                                                                                                                                                                                                                                                                                                                                                                                                                                                                                                                                                                                                                                                                                                                                                                                                                                                                                                                                                                                                                                                                                                                                                                                                                                                                                                                                                                                                                                                                                                                                                                                                                                                                                                                                                                                                                                                                                                                                                                                                                                                                                                                                                                                                                                                                                                                                                                                                                                                                                                                                                                                                                                                                                                                                                                                                                                                                                                                                                                                                                                                                                                                                                                                                                                                                                                                                                                                                                                                                                                                                                                                                                                                                                                                                                                                                                                                                                                                                                                                                                                                                                                                                                                                                                                                                                                                                                                                                                                                                                                                                                                                                                                                                   | Ospedale Santissima Annunziata                                                                       | Istituto Zooprofilattico Sperimentale della Puglia e della Basilicata                       | Barbieri G.; Bianco A.; Capozzi L.; Del Sambro L.; Giannico A.; Parisi A.; Quarato C.; Ridolfi D.; Simone D.; Tampola M.                                                                                                                                                                                                                                                                                          |
| EPI_ISL_9489523, EPI_ISL_9489524                                                                                                                                                                                                                                                                                                                                                                                                                                                                                                                                                                                                                                                                                                                                                                                                                                                                                                                                                                                                                                                                                                                                                                                                                                                                                                                                                                                                                                                                                                                                                                                                                                                                                                                                                                                                                                                                                                                                                                                                                                                                                                                                                                                                                                                                                                                                                                                                                                                                                                                                                                                                                                                                                                                                                                                                                                                                                                                                                                                                                                                                                                                                                                                                                                                                                                                                                                                                                                                                                                                                                                                                                                                                                                                                                                                                                                                                                                                                                                                                                                                                                                                                                                                                                                                                                                                                                                                                                                                                                                                                                                                                                                                                                                                                                                                                                                                                                                                                                                                                                                                                                                                                                                                                                                                                                                                                                                                                                                                                                                                                                                                                                                                                                                                                                                                                                                                                                                                                                                                                                                                                                                                                                                                                                                                                                                                                                                                                                                                                                                                                                                                                                                                                                                                                                                                                                                                                                                                                                                                                                                                                                                                                                                                                                                                                                                                                                                                                                                                                                                                                                                                                                                                                                                                                                                                                                                                                                                                                                                                                                                                                                                                                                                                                                                                                                                                                                                                                                                                                                                                                                                                                                                                                                                                                                                                                                                                                                                                                                                                                                                                                                                                                                                                                                                                                                                                                                                                                                                                                                                                                                                                                                                                                                                                                                                                                                                                                                                                                                                                                                                                                                                                                                                                                                                                                                                                                                                                                                                                                                                                  | Ospedale Umberto Parini                                                                              | U.O. Genomica - Istituto Zooprofilattico Sperimentale del Piemonte, Liguria e Valle d'Aosta | Simone Peletto                                                                                                                                                                                                                                                                                                                                                                                                    |
| EPI_ISL_9595743, EPI_ISL_9595786, EPI_ISL_9595787                                                                                                                                                                                                                                                                                                                                                                                                                                                                                                                                                                                                                                                                                                                                                                                                                                                                                                                                                                                                                                                                                                                                                                                                                                                                                                                                                                                                                                                                                                                                                                                                                                                                                                                                                                                                                                                                                                                                                                                                                                                                                                                                                                                                                                                                                                                                                                                                                                                                                                                                                                                                                                                                                                                                                                                                                                                                                                                                                                                                                                                                                                                                                                                                                                                                                                                                                                                                                                                                                                                                                                                                                                                                                                                                                                                                                                                                                                                                                                                                                                                                                                                                                                                                                                                                                                                                                                                                                                                                                                                                                                                                                                                                                                                                                                                                                                                                                                                                                                                                                                                                                                                                                                                                                                                                                                                                                                                                                                                                                                                                                                                                                                                                                                                                                                                                                                                                                                                                                                                                                                                                                                                                                                                                                                                                                                                                                                                                                                                                                                                                                                                                                                                                                                                                                                                                                                                                                                                                                                                                                                                                                                                                                                                                                                                                                                                                                                                                                                                                                                                                                                                                                                                                                                                                                                                                                                                                                                                                                                                                                                                                                                                                                                                                                                                                                                                                                                                                                                                                                                                                                                                                                                                                                                                                                                                                                                                                                                                                                                                                                                                                                                                                                                                                                                                                                                                                                                                                                                                                                                                                                                                                                                                                                                                                                                                                                                                                                                                                                                                                                                                                                                                                                                                                                                                                                                                                                                                                                                                                                                 | PathWest Laboratory Medicine WA                                                                      | PathWest Laboratory Medicine WA Microbial Surveillance Unit                                 | PathWest Laboratory Medicine WA Microbial Surveillance Unit                                                                                                                                                                                                                                                                                                                                                       |
| EPI_ISL_9696083, EPI_ISL_9696120, EPI_ISL_9696121, EPI_ISL_9696122, EPI_ISL_9696123                                                                                                                                                                                                                                                                                                                                                                                                                                                                                                                                                                                                                                                                                                                                                                                                                                                                                                                                                                                                                                                                                                                                                                                                                                                                                                                                                                                                                                                                                                                                                                                                                                                                                                                                                                                                                                                                                                                                                                                                                                                                                                                                                                                                                                                                                                                                                                                                                                                                                                                                                                                                                                                                                                                                                                                                                                                                                                                                                                                                                                                                                                                                                                                                                                                                                                                                                                                                                                                                                                                                                                                                                                                                                                                                                                                                                                                                                                                                                                                                                                                                                                                                                                                                                                                                                                                                                                                                                                                                                                                                                                                                                                                                                                                                                                                                                                                                                                                                                                                                                                                                                                                                                                                                                                                                                                                                                                                                                                                                                                                                                                                                                                                                                                                                                                                                                                                                                                                                                                                                                                                                                                                                                                                                                                                                                                                                                                                                                                                                                                                                                                                                                                                                                                                                                                                                                                                                                                                                                                                                                                                                                                                                                                                                                                                                                                                                                                                                                                                                                                                                                                                                                                                                                                                                                                                                                                                                                                                                                                                                                                                                                                                                                                                                                                                                                                                                                                                                                                                                                                                                                                                                                                                                                                                                                                                                                                                                                                                                                                                                                                                                                                                                                                                                                                                                                                                                                                                                                                                                                                                                                                                                                                                                                                                                                                                                                                                                                                                                                                                                                                                                                                                                                                                                                                                                                                                                                                                                                                                               | Platform BIS UZA/Uantwerpen                                                                          | Labo Klinische Biologie, UZA                                                                | Basil Britto Xavier; Christine Lammens; Herman Goossens; Ines Verbesselt; Jasmine Coppens; Kathleen Holemans; Marie Le Mercier; Veerle Matheussens                                                                                                                                                                                                                                                                |
| EPI_ISL_9644513                                                                                                                                                                                                                                                                                                                                                                                                                                                                                                                                                                                                                                                                                                                                                                                                                                                                                                                                                                                                                                                                                                                                                                                                                                                                                                                                                                                                                                                                                                                                                                                                                                                                                                                                                                                                                                                                                                                                                                                                                                                                                                                                                                                                                                                                                                                                                                                                                                                                                                                                                                                                                                                                                                                                                                                                                                                                                                                                                                                                                                                                                                                                                                                                                                                                                                                                                                                                                                                                                                                                                                                                                                                                                                                                                                                                                                                                                                                                                                                                                                                                                                                                                                                                                                                                                                                                                                                                                                                                                                                                                                                                                                                                                                                                                                                                                                                                                                                                                                                                                                                                                                                                                                                                                                                                                                                                                                                                                                                                                                                                                                                                                                                                                                                                                                                                                                                                                                                                                                                                                                                                                                                                                                                                                                                                                                                                                                                                                                                                                                                                                                                                                                                                                                                                                                                                                                                                                                                                                                                                                                                                                                                                                                                                                                                                                                                                                                                                                                                                                                                                                                                                                                                                                                                                                                                                                                                                                                                                                                                                                                                                                                                                                                                                                                                                                                                                                                                                                                                                                                                                                                                                                                                                                                                                                                                                                                                                                                                                                                                                                                                                                                                                                                                                                                                                                                                                                                                                                                                                                                                                                                                                                                                                                                                                                                                                                                                                                                                                                                                                                                                                                                                                                                                                                                                                                                                                                                                                                                                                                                                                   | Pok Oi Hospital                                                                                      | Hong Kong Department of Health                                                              | Alan K.L. Tsang; Edman T.K. Lam; Ken H.L. Ng; Patricia K. L. Leung; Peter C.W. Yip; Rickjason C.W. Chan                                                                                                                                                                                                                                                                                                           |
| EPI_ISL_9644531, EPI_ISL_9644532, EPI_ISL_9644533                                                                                                                                                                                                                                                                                                                                                                                                                                                                                                                                                                                                                                                                                                                                                                                                                                                                                                                                                                                                                                                                                                                                                                                                                                                                                                                                                                                                                                                                                                                                                                                                                                                                                                                                                                                                                                                                                                                                                                                                                                                                                                                                                                                                                                                                                                                                                                                                                                                                                                                                                                                                                                                                                                                                                                                                                                                                                                                                                                                                                                                                                                                                                                                                                                                                                                                                                                                                                                                                                                                                                                                                                                                                                                                                                                                                                                                                                                                                                                                                                                                                                                                                                                                                                                                                                                                                                                                                                                                                                                                                                                                                                                                                                                                                                                                                                                                                                                                                                                                                                                                                                                                                                                                                                                                                                                                                                                                                                                                                                                                                                                                                                                                                                                                                                                                                                                                                                                                                                                                                                                                                                                                                                                                                                                                                                                                                                                                                                                                                                                                                                                                                                                                                                                                                                                                                                                                                                                                                                                                                                                                                                                                                                                                                                                                                                                                                                                                                                                                                                                                                                                                                                                                                                                                                                                                                                                                                                                                                                                                                                                                                                                                                                                                                                                                                                                                                                                                                                                                                                                                                                                                                                                                                                                                                                                                                                                                                                                                                                                                                                                                                                                                                                                                                                                                                                                                                                                                                                                                                                                                                                                                                                                                                                                                                                                                                                                                                                                                                                                                                                                                                                                                                                                                                                                                                                                                                                                                                                                                                                                 | Precious Blood Hospital (Caritas)                                                                    | Hong Kong Department of Health                                                              | Alan K.L. Tsang; Edman T.K. Lam; Ken H.L. Ng; Patricia K. L. Leung; Peter C.W. Yip; Rickjason C.W. Chan                                                                                                                                                                                                                                                                                                           |
| EPI_ISL_9644519                                                                                                                                                                                                                                                                                                                                                                                                                                                                                                                                                                                                                                                                                                                                                                                                                                                                                                                                                                                                                                                                                                                                                                                                                                                                                                                                                                                                                                                                                                                                                                                                                                                                                                                                                                                                                                                                                                                                                                                                                                                                                                                                                                                                                                                                                                                                                                                                                                                                                                                                                                                                                                                                                                                                                                                                                                                                                                                                                                                                                                                                                                                                                                                                                                                                                                                                                                                                                                                                                                                                                                                                                                                                                                                                                                                                                                                                                                                                                                                                                                                                                                                                                                                                                                                                                                                                                                                                                                                                                                                                                                                                                                                                                                                                                                                                                                                                                                                                                                                                                                                                                                                                                                                                                                                                                                                                                                                                                                                                                                                                                                                                                                                                                                                                                                                                                                                                                                                                                                                                                                                                                                                                                                                                                                                                                                                                                                                                                                                                                                                                                                                                                                                                                                                                                                                                                                                                                                                                                                                                                                                                                                                                                                                                                                                                                                                                                                                                                                                                                                                                                                                                                                                                                                                                                                                                                                                                                                                                                                                                                                                                                                                                                                                                                                                                                                                                                                                                                                                                                                                                                                                                                                                                                                                                                                                                                                                                                                                                                                                                                                                                                                                                                                                                                                                                                                                                                                                                                                                                                                                                                                                                                                                                                                                                                                                                                                                                                                                                                                                                                                                                                                                                                                                                                                                                                                                                                                                                                                                                                                                                   | Prince of Wales Hospital                                                                             | Hong Kong Department of Health                                                              | Alan K.L. Tsang; Edman T.K. Lam; Ken H.L. Ng; Patricia K. L. Leung; Peter C.W. Yip; Rickjason C.W. Chan                                                                                                                                                                                                                                                                                                           |
| EPI_ISL_9616294, EPI_ISL_9616311, EPI_ISL_9616312, EPI_ISL_9616314, EPI_ISL_9616315, EPI_ISL_9616317                                                                                                                                                                                                                                                                                                                                                                                                                                                                                                                                                                                                                                                                                                                                                                                                                                                                                                                                                                                                                                                                                                                                                                                                                                                                                                                                                                                                                                                                                                                                                                                                                                                                                                                                                                                                                                                                                                                                                                                                                                                                                                                                                                                                                                                                                                                                                                                                                                                                                                                                                                                                                                                                                                                                                                                                                                                                                                                                                                                                                                                                                                                                                                                                                                                                                                                                                                                                                                                                                                                                                                                                                                                                                                                                                                                                                                                                                                                                                                                                                                                                                                                                                                                                                                                                                                                                                                                                                                                                                                                                                                                                                                                                                                                                                                                                                                                                                                                                                                                                                                                                                                                                                                                                                                                                                                                                                                                                                                                                                                                                                                                                                                                                                                                                                                                                                                                                                                                                                                                                                                                                                                                                                                                                                                                                                                                                                                                                                                                                                                                                                                                                                                                                                                                                                                                                                                                                                                                                                                                                                                                                                                                                                                                                                                                                                                                                                                                                                                                                                                                                                                                                                                                                                                                                                                                                                                                                                                                                                                                                                                                                                                                                                                                                                                                                                                                                                                                                                                                                                                                                                                                                                                                                                                                                                                                                                                                                                                                                                                                                                                                                                                                                                                                                                                                                                                                                                                                                                                                                                                                                                                                                                                                                                                                                                                                                                                                                                                                                                                                                                                                                                                                                                                                                                                                                                                                                                                                                                                              | Pubic Health Laboratory, Public Health Laboratory, Public Health Service, Amsterdam, The Netherlands | inBiome                                                                                     | Donald van Pinxteren; Dries Budding; Martine Bos                                                                                                                                                                                                                                                                                                                                                                  |
| EPI_ISL_9644490, EPI_ISL_9644491, EPI_ISL_9644492, EPI_ISL_9644493                                                                                                                                                                                                                                                                                                                                                                                                                                                                                                                                                                                                                                                                                                                                                                                                                                                                                                                                                                                                                                                                                                                                                                                                                                                                                                                                                                                                                                                                                                                                                                                                                                                                                                                                                                                                                                                                                                                                                                                                                                                                                                                                                                                                                                                                                                                                                                                                                                                                                                                                                                                                                                                                                                                                                                                                                                                                                                                                                                                                                                                                                                                                                                                                                                                                                                                                                                                                                                                                                                                                                                                                                                                                                                                                                                                                                                                                                                                                                                                                                                                                                                                                                                                                                                                                                                                                                                                                                                                                                                                                                                                                                                                                                                                                                                                                                                                                                                                                                                                                                                                                                                                                                                                                                                                                                                                                                                                                                                                                                                                                                                                                                                                                                                                                                                                                                                                                                                                                                                                                                                                                                                                                                                                                                                                                                                                                                                                                                                                                                                                                                                                                                                                                                                                                                                                                                                                                                                                                                                                                                                                                                                                                                                                                                                                                                                                                                                                                                                                                                                                                                                                                                                                                                                                                                                                                                                                                                                                                                                                                                                                                                                                                                                                                                                                                                                                                                                                                                                                                                                                                                                                                                                                                                                                                                                                                                                                                                                                                                                                                                                                                                                                                                                                                                                                                                                                                                                                                                                                                                                                                                                                                                                                                                                                                                                                                                                                                                                                                                                                                                                                                                                                                                                                                                                                                                                                                                                                                                                                                                | Quarantine Camp                                                                                      | Hong Kong Department of Health                                                              | Alan K.L. Tsang; Edman T.K. Lam; Ken H.L. Ng; Patricia K. L. Leung; Peter C.W. Yip; Rickjason C.W. Chan                                                                                                                                                                                                                                                                                                           |
| EPI_ISL_9644523, EPI_ISL_9644524, EPI_ISL_9644525                                                                                                                                                                                                                                                                                                                                                                                                                                                                                                                                                                                                                                                                                                                                                                                                                                                                                                                                                                                                                                                                                                                                                                                                                                                                                                                                                                                                                                                                                                                                                                                                                                                                                                                                                                                                                                                                                                                                                                                                                                                                                                                                                                                                                                                                                                                                                                                                                                                                                                                                                                                                                                                                                                                                                                                                                                                                                                                                                                                                                                                                                                                                                                                                                                                                                                                                                                                                                                                                                                                                                                                                                                                                                                                                                                                                                                                                                                                                                                                                                                                                                                                                                                                                                                                                                                                                                                                                                                                                                                                                                                                                                                                                                                                                                                                                                                                                                                                                                                                                                                                                                                                                                                                                                                                                                                                                                                                                                                                                                                                                                                                                                                                                                                                                                                                                                                                                                                                                                                                                                                                                                                                                                                                                                                                                                                                                                                                                                                                                                                                                                                                                                                                                                                                                                                                                                                                                                                                                                                                                                                                                                                                                                                                                                                                                                                                                                                                                                                                                                                                                                                                                                                                                                                                                                                                                                                                                                                                                                                                                                                                                                                                                                                                                                                                                                                                                                                                                                                                                                                                                                                                                                                                                                                                                                                                                                                                                                                                                                                                                                                                                                                                                                                                                                                                                                                                                                                                                                                                                                                                                                                                                                                                                                                                                                                                                                                                                                                                                                                                                                                                                                                                                                                                                                                                                                                                                                                                                                                                                                                 | Queen Elizabeth Hospital                                                                             | Hong Kong Department of Health                                                              | Alan K.L. Tsang; Edman T.K. Lam; Ken H.L. Ng; Patricia K. L. Leung; Peter C.W. Yip; Rickjason C.W. Chan                                                                                                                                                                                                                                                                                                           |
| EPI_ISL_9644511, EPI_ISL_9644514, EPI_ISL_9644515                                                                                                                                                                                                                                                                                                                                                                                                                                                                                                                                                                                                                                                                                                                                                                                                                                                                                                                                                                                                                                                                                                                                                                                                                                                                                                                                                                                                                                                                                                                                                                                                                                                                                                                                                                                                                                                                                                                                                                                                                                                                                                                                                                                                                                                                                                                                                                                                                                                                                                                                                                                                                                                                                                                                                                                                                                                                                                                                                                                                                                                                                                                                                                                                                                                                                                                                                                                                                                                                                                                                                                                                                                                                                                                                                                                                                                                                                                                                                                                                                                                                                                                                                                                                                                                                                                                                                                                                                                                                                                                                                                                                                                                                                                                                                                                                                                                                                                                                                                                                                                                                                                                                                                                                                                                                                                                                                                                                                                                                                                                                                                                                                                                                                                                                                                                                                                                                                                                                                                                                                                                                                                                                                                                                                                                                                                                                                                                                                                                                                                                                                                                                                                                                                                                                                                                                                                                                                                                                                                                                                                                                                                                                                                                                                                                                                                                                                                                                                                                                                                                                                                                                                                                                                                                                                                                                                                                                                                                                                                                                                                                                                                                                                                                                                                                                                                                                                                                                                                                                                                                                                                                                                                                                                                                                                                                                                                                                                                                                                                                                                                                                                                                                                                                                                                                                                                                                                                                                                                                                                                                                                                                                                                                                                                                                                                                                                                                                                                                                                                                                                                                                                                                                                                                                                                                                                                                                                                                                                                                                                                 | Queen Mary Hospital                                                                                  | Hong Kong Department of Health                                                              | Alan K.L. Tsang; Edman T.K. Lam; Ken H.L. Ng; Patricia K. L. Leung; Peter C.W. Yip; Rickjason C.W. Chan                                                                                                                                                                                                                                                                                                           |
| EPI_ISL_9609706, EPI_ISL_9609707, EPI_ISL_9609708, EPI_ISL_9609709                                                                                                                                                                                                                                                                                                                                                                                                                                                                                                                                                                                                                                                                                                                                                                                                                                                                                                                                                                                                                                                                                                                                                                                                                                                                                                                                                                                                                                                                                                                                                                                                                                                                                                                                                                                                                                                                                                                                                                                                                                                                                                                                                                                                                                                                                                                                                                                                                                                                                                                                                                                                                                                                                                                                                                                                                                                                                                                                                                                                                                                                                                                                                                                                                                                                                                                                                                                                                                                                                                                                                                                                                                                                                                                                                                                                                                                                                                                                                                                                                                                                                                                                                                                                                                                                                                                                                                                                                                                                                                                                                                                                                                                                                                                                                                                                                                                                                                                                                                                                                                                                                                                                                                                                                                                                                                                                                                                                                                                                                                                                                                                                                                                                                                                                                                                                                                                                                                                                                                                                                                                                                                                                                                                                                                                                                                                                                                                                                                                                                                                                                                                                                                                                                                                                                                                                                                                                                                                                                                                                                                                                                                                                                                                                                                                                                                                                                                                                                                                                                                                                                                                                                                                                                                                                                                                                                                                                                                                                                                                                                                                                                                                                                                                                                                                                                                                                                                                                                                                                                                                                                                                                                                                                                                                                                                                                                                                                                                                                                                                                                                                                                                                                                                                                                                                                                                                                                                                                                                                                                                                                                                                                                                                                                                                                                                                                                                                                                                                                                                                                                                                                                                                                                                                                                                                                                                                                                                                                                                                                                | Regional Public Health Authority with the seat in Trenčín                                            | Regional Public Health Authority with the seat in Trenčín                                   | Diana Rusňáková; Katarína Bujnová; Kristína Beňová; Lenka Reizigová; Miroslav Böhmer; Natália Krížková; Nikola Sličková; Pavol Mišenko; Tomáš Szemes                                                                                                                                                                                                                                                              |
| EPI_ISL_9597211, EPI_ISL_9597380, EPI_ISL_9597415, EPI_ISL_9597452, EPI_ISL_9597472, EPI_ISL_9604121, EPI_ISL_9604160, EPI_ISL_9604173, EPI_ISL_9604186, EPI_ISL_9604191, EPI_ISL_9605414, EPI_ISL_9604113, EPI_ISL_9604122, EPI_ISL_9604130, EPI_ISL_9604141, EPI_ISL_9604172, EPI_ISL_9604173, EPI_ISL_9604179, EPI_ISL_9604182, EPI_ISL_9604218, EPI_ISL_9604226, EPI_ISL_9604236, EPI_ISL_9604237, EPI_ISL_9604238, EPI_ISL_9604239, EPI_ISL_9604240, EPI_ISL_9604241, EPI_ISL_9604242, EPI_ISL_9604243, EPI_ISL_9604244, EPI_ISL_9604245, EPI_ISL_9604246, EPI_ISL_9604247, EPI_ISL_9604248, EPI_ISL_9604249, EPI_ISL_9604250, EPI_ISL_9604251, EPI_ISL_9604252, EPI_ISL_9604253, EPI_ISL_9604254, EPI_ISL_9604255, EPI_ISL_9604256, EPI_ISL_9604257, EPI_ISL_9604258, EPI_ISL_9604259, EPI_ISL_9604260, EPI_ISL_9604261, EPI_ISL_9604262, EPI_ISL_9604263, EPI_ISL_9604264, EPI_ISL_9604265, EPI_ISL_9604266, EPI_ISL_9604267, EPI_ISL_9604268, EPI_ISL_9604269, EPI_ISL_9604270, EPI_ISL_9604271, EPI_ISL_9604272, EPI_ISL_9604273, EPI_ISL_9604274, EPI_ISL_9604275, EPI_ISL_9604276, EPI_ISL_9604277, EPI_ISL_9604278, EPI_ISL_9604279, EPI_ISL_9604280, EPI_ISL_9604281, EPI_ISL_9604282, EPI_ISL_9604283, EPI_ISL_9604284, EPI_ISL_9604285, EPI_ISL_9604286, EPI_ISL_9604287, EPI_ISL_9604288, EPI_ISL_9604289, EPI_ISL_9604290, EPI_ISL_9604291, EPI_ISL_9604292, EPI_ISL_9604293, EPI_ISL_9604294, EPI_ISL_9604295, EPI_ISL_9604296, EPI_ISL_9604297, EPI_ISL_9604298, EPI_ISL_9604299, EPI_ISL_9604300, EPI_ISL_9604301, EPI_ISL_9604302, EPI_ISL_9604303, EPI_ISL_9604304, EPI_ISL_9604305, EPI_ISL_9604306, EPI_ISL_9604307, EPI_ISL_9604308, EPI_ISL_9604309, EPI_ISL_9604310, EPI_ISL_9604311, EPI_ISL_9604312, EPI_ISL_9604313, EPI_ISL_9604314, EPI_ISL_9604315, EPI_ISL_9604316, EPI_ISL_9604317, EPI_ISL_9604318, EPI_ISL_9604319, EPI_ISL_9604320, EPI_ISL_9604321, EPI_ISL_9604322, EPI_ISL_9604323, EPI_ISL_9604324, EPI_ISL_9604325, EPI_ISL_9604326, EPI_ISL_9604327, EPI_ISL_9604328, EPI_ISL_9604329, EPI_ISL_9604330, EPI_ISL_9604331, EPI_ISL_9604332, EPI_ISL_9604333, EPI_ISL_9604334, EPI_ISL_9604335, EPI_ISL_9604336, EPI_ISL_9604337, EPI_ISL_9604338, EPI_ISL_9604339, EPI_ISL_9604340, EPI_ISL_9604341, EPI_ISL_9604342, EPI_ISL_9604343, EPI_ISL_9604344, EPI_ISL_9604345, EPI_ISL_9604346, EPI_ISL_9604347, EPI_ISL_9604348, EPI_ISL_9604349, EPI_ISL_9604350, EPI_ISL_9604351, EPI_ISL_9604352, EPI_ISL_9604353, EPI_ISL_9604354, EPI_ISL_9604355, EPI_ISL_9604356, EPI_ISL_9604357, EPI_ISL_9604358, EPI_ISL_9604359, EPI_ISL_9604360, EPI_ISL_9604361, EPI_ISL_9604362, EPI_ISL_9604363, EPI_ISL_9604364, EPI_ISL_9604365, EPI_ISL_9604366, EPI_ISL_9604367, EPI_ISL_9604368, EPI_ISL_9604369, EPI_ISL_9604370, EPI_ISL_9604371, EPI_ISL_9604372, EPI_ISL_9604373, EPI_ISL_9604374, EPI_ISL_9604375, EPI_ISL_9604376, EPI_ISL_9604377, EPI_ISL_9604378, EPI_ISL_9604379, EPI_ISL_9604380, EPI_ISL_9604381, EPI_ISL_9604382, EPI_ISL_9604383, EPI_ISL_9604384, EPI_ISL_9604385, EPI_ISL_9604386, EPI_ISL_9604387, EPI_ISL_9604388, EPI_ISL_9604389, EPI_ISL_9604390, EPI_ISL_9604391, EPI_ISL_9604392, EPI_ISL_9604393, EPI_ISL_9604394, EPI_ISL_9604395, EPI_ISL_9604396, EPI_ISL_9604397, EPI_ISL_9604398, EPI_ISL_9604399, EPI_ISL_9604400, EPI_ISL_9604401, EPI_ISL_9604402, EPI_ISL_9604403, EPI_ISL_9604404, EPI_ISL_9604405, EPI_ISL_9604406, EPI_ISL_9604407, EPI_ISL_9604408, EPI_ISL_9604409, EPI_ISL_9604410, EPI_ISL_9604411, EPI_ISL_9604412, EPI_ISL_9604413, EPI_ISL_9604414, EPI_ISL_9604415, EPI_ISL_9604416, EPI_ISL_9604417, EPI_ISL_9604418, EPI_ISL_9604419, EPI_ISL_9604420, EPI_ISL_9604421, EPI_ISL_9604422, EPI_ISL_9604423, EPI_ISL_9604424, EPI_ISL_9604425, EPI_ISL_9604426, EPI_ISL_9604427, EPI_ISL_9604428, EPI_ISL_9604429, EPI_ISL_9604430, EPI_ISL_9604431, EPI_ISL_9604432, EPI_ISL_9604433, EPI_ISL_9604434, EPI_ISL_9604435, EPI_ISL_9604436, EPI_ISL_9604437, EPI_ISL_9604438, EPI_ISL_9604439, EPI_ISL_9604440, EPI_ISL_9604441, EPI_ISL_9604442, EPI_ISL_9604443, EPI_ISL_9604444, EPI_ISL_9604445, EPI_ISL_9604446, EPI_ISL_9604447, EPI_ISL_9604448, EPI_ISL_9604449, EPI_ISL_9604450, EPI_ISL_9604451, EPI_ISL_9604452, EPI_ISL_9604453, EPI_ISL_9604454, EPI_ISL_9604455, EPI_ISL_9604456, EPI_ISL_9604457, EPI_ISL_9604458, EPI_ISL_9604459, EPI_ISL_9604460, EPI_ISL_9604461, EPI_ISL_9604462, EPI_ISL_9604463, EPI_ISL_9604464, EPI_ISL_9604465, EPI_ISL_9604466, EPI_ISL_9604467, EPI_ISL_9604468, EPI_ISL_9604469, EPI_ISL_9604470, EPI_ISL_9604471, EPI_ISL_9604472, EPI_ISL_9604473, EPI_ISL_9604474, EPI_ISL_9604475, EPI_ISL_9604476, EPI_ISL_9604477, EPI_ISL_9604478, EPI_ISL_9604479, EPI_ISL_9604480, EPI_ISL_9604481, EPI_ISL_9604482, EPI_ISL_9604483, EPI_ISL_9604484, EPI_ISL_9604485, EPI_ISL_9604486, EPI_ISL_9604487, EPI_ISL_9604488, EPI_ISL_9604489, EPI_ISL_9604490, EPI_ISL_9604491, EPI_ISL_9604492, EPI_ISL_9604493, EPI_ISL_9604494, EPI_ISL_9604495, EPI_ISL_9604496, EPI_ISL_9604497, EPI_ISL_9604498, EPI_ISL_9604499, EPI_ISL_9604500, EPI_ISL_9604501, EPI_ISL_9604502, EPI_ISL_9604503, EPI_ISL_9604504, EPI_ISL_9604505, EPI_ISL_9604506, EPI_ISL_9604507, EPI_ISL_9604508, EPI_ISL_9604509, EPI_ISL_9604510, EPI_ISL_9604511, EPI_ISL_9604512, EPI_ISL_9604513, EPI_ISL_9604514, EPI_ISL_9604515, EPI_ISL_9604516, EPI_ISL_9604517, EPI_ISL_9604518, EPI_ISL_9604519, EPI_ISL_9604520, EPI_ISL_9604521, EPI_ISL_9604522, EPI_ISL_9604523, EPI_ISL_9604524, EPI_ISL_9604525, EPI_ISL_9604526, EPI_ISL_9604527, EPI_ISL_9604528, EPI_ISL_9604529, EPI_ISL_9604530, EPI_ISL_9604531, EPI_ISL_9604532, EPI_ISL_9604533, EPI_ISL_9604534, EPI_ISL_9604535, EPI_ISL_9604536, EPI_ISL_9604537, EPI_ISL_9604538, EPI_ISL_9604539, EPI_ISL_9604540, EPI_ISL_9604541, EPI_ISL_9604542, EPI_ISL_9604543, EPI_ISL_9604544, EPI_ISL_9604545, EPI_ISL_9604546, EPI_ISL_9604547, EPI_ISL_9604548, EPI_ISL_9604549, EPI_ISL_9604550, EPI_ISL_9604551, EPI_ISL_9604552, EPI_ISL_9604553, EPI_ISL_9604554, EPI_ISL_9604555, EPI_ISL_9604556, EPI_ISL_9604557, EPI_ISL_9604558, EPI_ISL_9604559, EPI_ISL_9604560, EPI_ISL_9604561, EPI_ISL_9604562, EPI_ISL_9604563, EPI_ISL_9604564, EPI_ISL_9604565, EPI_ISL_9604566, EPI_ISL_9604567, EPI_ISL_9604568, EPI_ISL_9604569, EPI_ISL_9604570, EPI_ISL_9604571, EPI_ISL_9604572, EPI_ISL_9604573, EPI_ISL_9604574, EPI_ISL_9604575, EPI_ISL_9604576, EPI_ISL_9604577, EPI_ISL_9604578, EPI_ISL_9604579, EPI_ISL_9604580, EPI_ISL_9604581, EPI_ISL_9604582, EPI_ISL_9604583, EPI_ISL_9604584, EPI_ISL_9604585, EPI_ISL_9604586, EPI_ISL_9604587, EPI_ISL_9604588, EPI_ISL_9604589, EPI_ISL_9604590, EPI_ISL_9604591, EPI_ISL_9604592, EPI_ISL_9604593, EPI_ISL_9604594, EPI_ISL_9604595, EPI_ISL_9604596, EPI_ISL_9604597, EPI_ISL_9604598, EPI_ISL_9604599, EPI_ISL_9604600, EPI_ISL_9604601, EPI_ISL_9604602, EPI_ISL_9604603, EPI_ISL_9604604, EPI_ISL_9604605, EPI_ISL_9604606, EPI_ISL_9604607, EPI_ISL_9604608, EPI_ISL_9604609, EPI_ISL_9604610, EPI_ISL_9604611, EPI_ISL_9604612, EPI_ISL_9604613, EPI_ISL_9604614, EPI_ISL_9604615, EPI_ISL_9604616, EPI_ISL_9604617, EPI_ISL_9604618, EPI_ISL_9604619, EPI_ISL_9604620, EPI_ISL_9604621, EPI_ISL_9604622, EPI_ISL_9604623, EPI_ISL_9604624, EPI_ISL_9604625, EPI_ISL_9604626, EPI_ISL_9604627, EPI_ISL_9604628, EPI_ISL_9604629, EPI_ISL_9604630, EPI_ISL_9604631, EPI_ISL_9604632, EPI_ISL_9604633, EPI_ISL_9604634, EPI_ISL_9604635, EPI_ISL_9604636, EPI_ISL_9604637, EPI_ISL_9604638, EPI_ISL_9604639, EPI_ISL_9604640, EPI_ISL_9604641, EPI_ISL_9604642, EPI_ISL_9604643, EPI_ISL_9604644, EPI_ISL_9604645, EPI_ISL_9604646, EPI_ISL_9604647, EPI_ISL_9604648, EPI_ISL_9604649, EPI_ISL_9604650, EPI_ISL_9604651, EPI_ISL_9604652, EPI_ISL_9604653, EPI_ISL_9604654, EPI_ISL_9604655, EPI_ISL_9604656, EPI_ISL_9604657, EPI_ISL_9604658, EPI_ISL_9604659, EPI_ISL_9604660, EPI_ISL_9604661, EPI_ISL_9604662, EPI_ISL_9604663, EPI_ISL_9604664, EPI_ISL_9604665, EPI_ISL_9604666, EPI_ISL_9604667, EPI_ISL_9604668, EPI_ISL_9604669, EPI_ISL_9604670, EPI_ISL_9604671, EPI_ISL_9604672, EPI_ISL_9604673, EPI_ISL_9604674, EPI_ISL_9604675, EPI_ISL_9604676, EPI_ISL_9604677, EPI_ISL_9604678, EPI_ISL_9604679, EPI_ISL_9604680, EPI_ISL_9604681, EPI_ISL_9604682, EPI_ISL_9604683, EPI_ISL_9604684, EPI_ISL_9604685, EPI_ISL_9604686, EPI_ISL_9604687, EPI_ISL_9604688, EPI_ISL_9604689, EPI_ISL_9604690, EPI_ISL_9604691, EPI_ISL_9604692, EPI_ISL_9604693, EPI_ISL_9604694, EPI_ISL_9604695, EPI_ISL_9604696, EPI_ISL_9604697, EPI_ISL_9604698, EPI_ISL_9604699, EPI_ISL_9604700, EPI_ISL_9604701, EPI_ISL_9604702, EPI_ISL_9604703, EPI_ISL_9604704, EPI_ISL_9604705, EPI_ISL_9604706, EPI_ISL_9604707, EPI_ISL_9604708, EPI_ISL_9604709, EPI_ISL_9604710, EPI_ISL_9604711, EPI_ISL_9604712, EPI_ISL_9604713, EPI_ISL_9604714, EPI_ISL_9604715, EPI_ISL_9604716, EPI_ISL_9604717, EPI_ISL_9604718, EPI_ISL_9604719, EPI_ISL_9604720, EPI_ISL_9604721, EPI_ISL_9604722, EPI_ISL_9604723, EPI_ISL_9604724, EPI_ISL_9604725, EPI_ISL_9604726, EPI_ISL_9604727, EPI_ISL_9604728, EPI_ISL_9604729, EPI_ISL_9604730, EPI_ISL_9604731, EPI_ISL_9604732, EPI_ISL_9604733, EPI_ISL_9604734, EPI_ISL_9604735, EPI_ISL_9604736, EPI_ISL_9604737, EPI_ISL_9604738, EPI_ISL_9604739, EPI_ISL_9604740, EPI_ISL_9604741, EPI_ISL_9604742, EPI_ISL_9604743, EPI_ISL_9604744, EPI_ISL_9604745, EPI_ISL_9604746, EPI_ISL_9604747, EPI_ISL_9604748, EPI_ISL_9604749, EPI_ISL_9604750, EPI_ISL_9604751, EPI_ISL_9604752, EPI_ISL_9604753, EPI_ISL_9604754, EPI_ISL_9604755, EPI_ISL_9604756, EPI_ISL_9604757, EPI_ISL_9604758, EPI_ISL_9604759, EPI_ISL_9604760, EPI_ISL_9604761, EPI_ISL_9604762, EPI_ISL_9604763, EPI_ISL_9604764, EPI_ISL_9604765, EPI_ISL_9604766, EPI_ISL_9604767, EPI_ISL_9604768, EPI_ISL_9604769, EPI_ISL_9604770, EPI_ISL_9604771, EPI_ISL_9604772, EPI_ISL_9604773, EPI_ISL_9604774, EPI_ISL_9604775, EPI_ISL_9604776, EPI_ISL_9604777, EPI_ISL_9604778, EPI_ISL_9604779, EPI_ISL_9604780, EPI_ISL_9604781, EPI_ISL_9604782, EPI_ISL_9604783, EPI_ISL_9604784, EPI_ISL_9604785, EPI_ISL_9604786, EPI_ISL_9604787, EPI_ISL_9604788, EPI_ISL_9604789, EPI_ISL_9604790, EPI_ISL_9604791, EPI_ISL_9604792, EPI_ISL_9604793, EPI_ISL_9604794, EPI_ISL_9604795, EPI_ISL_9604796, EPI_ISL_9604797, EPI_ISL_9604798, EPI_ISL_9604799, EPI_ISL_9604800, EPI_ISL_9604801, EPI_ISL_9604802, EPI_ISL_9604803, EPI_ISL_9604804, EPI_ISL_9604805, EPI_ISL_9604806, EPI_ISL_9604807, EPI_ISL_9604808, EPI_ISL_9604809, EPI_ISL_960481 |                                                                                                      |                                                                                             |                                                                                                                                                                                                                                                                                                                                                                                                                   |

|                                                                                                                                                                                                                                                                                                                                                                                                                                                                                                                                                                                 |                                                                                     |                                                                                                         |                                                                                                                                                                                                                                                                                                                                                                                                                                                                                                                                                                                                                                                                                                           |
|---------------------------------------------------------------------------------------------------------------------------------------------------------------------------------------------------------------------------------------------------------------------------------------------------------------------------------------------------------------------------------------------------------------------------------------------------------------------------------------------------------------------------------------------------------------------------------|-------------------------------------------------------------------------------------|---------------------------------------------------------------------------------------------------------|-----------------------------------------------------------------------------------------------------------------------------------------------------------------------------------------------------------------------------------------------------------------------------------------------------------------------------------------------------------------------------------------------------------------------------------------------------------------------------------------------------------------------------------------------------------------------------------------------------------------------------------------------------------------------------------------------------------|
| EPI_ISL_9657106, EPI_ISL_9657112, EPI_ISL_9657117, EPI_ISL_9657122, EPI_ISL_9657126                                                                                                                                                                                                                                                                                                                                                                                                                                                                                             | Shamir Medical Center (Asaf Harofe)                                                 | Shamir Medical Center (Asaf Harofe)                                                                     | Abu Hamad Ramzia; Adina Bar Chaim; Alona Frenkel; Anna Vishnevsky; Chen Weiner; Nir Rainy; Patricia Benveniste-Lekovitz; Reut Sorek Abramovich; Yevgeni Yegorov                                                                                                                                                                                                                                                                                                                                                                                                                                                                                                                                           |
| EPI_ISL_9664829, EPI_ISL_9664830, EPI_ISL_9664831                                                                                                                                                                                                                                                                                                                                                                                                                                                                                                                               | Slaski Park Technologii Medycznych Kardio-Med Silesia                               | Wojewódzka Stacja Sanitarno-Epidemiologiczna w Katowicach                                               | Adrian Miara; Agata Chajda; Beata Rozwadowska; Elzbieta Bartkowiak; Marta Albertyńska                                                                                                                                                                                                                                                                                                                                                                                                                                                                                                                                                                                                                     |
| EPI_ISL_9744865, EPI_ISL_9744870, EPI_ISL_9744928, EPI_ISL_9744944                                                                                                                                                                                                                                                                                                                                                                                                                                                                                                              | Städtisches Klinikum Dresden Institut für Klinische Chemie und Laboratoriumsmedizin | Robert Koch Institute                                                                                   |                                                                                                                                                                                                                                                                                                                                                                                                                                                                                                                                                                                                                                                                                                           |
| EPI_ISL_9696291                                                                                                                                                                                                                                                                                                                                                                                                                                                                                                                                                                 | Surat Municipal Institute of Medical Education and Research (SMIMER), Surat         | Gujarat Biotechnology Research Centre                                                                   | Akhilesh Modi; Apurvashin Puvar; Bhadrashreshin Gohil; Chaitanya Joshi; Disha Vora; Janvi Raval; Jaykumar Rangani; Madhvi Joshi; Manish Patel; Nimesh Patel; Nitin Salvaliya; NitinShukla; Priyank Chavda; Ramesh Pandit; Roshani Mishra; Sonal Sharma; Tasnim Trivedi; Zarna Patel                                                                                                                                                                                                                                                                                                                                                                                                                       |
| EPI_ISL_9644521, EPI_ISL_9644541                                                                                                                                                                                                                                                                                                                                                                                                                                                                                                                                                | TIER 5B (PMP)                                                                       | Hong Kong Department of Health                                                                          | Alan K.L. Tsang; Edman T.K. Lam; Ken H.L. Ng; Patricia K. L. Leung; Peter C.W. Yip; Rickjason C.W. Chan                                                                                                                                                                                                                                                                                                                                                                                                                                                                                                                                                                                                   |
| EPI_ISL_9644522                                                                                                                                                                                                                                                                                                                                                                                                                                                                                                                                                                 | TIER 7H (GOPC/OTHERS)                                                               | Hong Kong Department of Health                                                                          | Alan K.L. Tsang; Edman T.K. Lam; Ken H.L. Ng; Patricia K. L. Leung; Peter C.W. Yip; Rickjason C.W. Chan                                                                                                                                                                                                                                                                                                                                                                                                                                                                                                                                                                                                   |
| EPI_ISL_9644498, EPI_ISL_9644516, EPI_ISL_9644517, EPI_ISL_9644518, EPI_ISL_9644520, EPI_ISL_9644526, EPI_ISL_9644528, EPI_ISL_9644529, EPI_ISL_9644530, EPI_ISL_9644534, EPI_ISL_9644538, EPI_ISL_9644539, EPI_ISL_9644540                                                                                                                                                                                                                                                                                                                                                     | see above                                                                           | Hong Kong Department of Health                                                                          | Alan K.L. Tsang; Edman T.K. Lam; Ken H.L. Ng; Patricia K. L. Leung; Peter C.W. Yip; Rickjason C.W. Chan                                                                                                                                                                                                                                                                                                                                                                                                                                                                                                                                                                                                   |
| EPI_ISL_9761549, EPI_ISL_9761568                                                                                                                                                                                                                                                                                                                                                                                                                                                                                                                                                | The Jackson Laboratory                                                              | The Jackson Laboratory                                                                                  | Adams M; Carrano E; Kelly K; Li L; Long E; Omerza G; Renzette N                                                                                                                                                                                                                                                                                                                                                                                                                                                                                                                                                                                                                                           |
| EPI_ISL_9644512, EPI_ISL_9644537                                                                                                                                                                                                                                                                                                                                                                                                                                                                                                                                                | Tin Shui Wai Hospital                                                               | Hong Kong Department of Health                                                                          | Alan K.L. Tsang; Edman T.K. Lam; Ken H.L. Ng; Patricia K. L. Leung; Peter C.W. Yip; Rickjason C.W. Chan                                                                                                                                                                                                                                                                                                                                                                                                                                                                                                                                                                                                   |
| EPI_ISL_9638507, EPI_ISL_9638517                                                                                                                                                                                                                                                                                                                                                                                                                                                                                                                                                | Tulane University School of Medicine                                                | Tulane University School of Medicine                                                                    | Di Tian                                                                                                                                                                                                                                                                                                                                                                                                                                                                                                                                                                                                                                                                                                   |
| EPI_ISL_9698605                                                                                                                                                                                                                                                                                                                                                                                                                                                                                                                                                                 | UPMC Clinical Microbiology Laboratory                                               | Microbial Genome Sequencing Center; Microbial Genomic Epidemiology Laboratory, University of Pittsburgh | Daniel J. Snyder; Jane W. Marsh; Kady D. Waggle; Lee H. Harrison; Marissa P. Griffith; Vatsala R. Srinivasa; Vaughn S. Cooper                                                                                                                                                                                                                                                                                                                                                                                                                                                                                                                                                                             |
| EPI_ISL_9744906, EPI_ISL_9744974, EPI_ISL_9744978                                                                                                                                                                                                                                                                                                                                                                                                                                                                                                                               | Uniklinikum Carl Gustav Carus an der TU Dresden; Institut für Virologie             | Robert Koch Institute                                                                                   |                                                                                                                                                                                                                                                                                                                                                                                                                                                                                                                                                                                                                                                                                                           |
| EPI_ISL_9644508                                                                                                                                                                                                                                                                                                                                                                                                                                                                                                                                                                 | United Christian Hospital                                                           | Hong Kong Department of Health                                                                          | Alan K.L. Tsang; Edman T.K. Lam; Ken H.L. Ng; Patricia K. L. Leung; Peter C.W. Yip; Rickjason C.W. Chan                                                                                                                                                                                                                                                                                                                                                                                                                                                                                                                                                                                                   |
| EPI_ISL_9752087, EPI_ISL_9752095                                                                                                                                                                                                                                                                                                                                                                                                                                                                                                                                                | University Hospitals of Geneva, Laboratory of Virology                              | HUG, Laboratory of Virology and the Health2030 Genome Center                                            | Aline Mamin; Ana Rita Goncalves; Cedric Howald; Deborah Penet; Francisco Perez; Henri Pegeot; Ioannis Xenarios; Keith Harshman; Laurent Kaiser; Lorenzo Cerutti; Melyssa Elies; Samuel Cordey                                                                                                                                                                                                                                                                                                                                                                                                                                                                                                             |
| EPI_ISL_9616545, EPI_ISL_9616546, EPI_ISL_9616563, EPI_ISL_9616567, EPI_ISL_9755172                                                                                                                                                                                                                                                                                                                                                                                                                                                                                             | Università degli Studi di Perugia                                                   | Istituto Zooprofilattico Sperimentale dell'Abruzzo e Molise "G. Caporale"                               | Ancora M; Biagetti M; Calistri P; Camilloni B; Cammà C; Curini V; Delli Compagni E; Di Domenico M; Di Pasquale A; Giammaricoli M; Lorusso A; Mangone I; Marcacci M; Mencacci A; Puglia I; Rinaldi A; Savini G; Scialabba S                                                                                                                                                                                                                                                                                                                                                                                                                                                                                |
| EPI_ISL_9655297                                                                                                                                                                                                                                                                                                                                                                                                                                                                                                                                                                 | UniversitätsSpital Zürich                                                           | Institute of Medical Virology, University of Zurich                                                     | Alexandra Trkola; Annette Audigé; Cyril Shah; Gabriela Ziltener; Guido Bloembergen; Jon Huder; Jürg Böni; Kevin Steiner; Maria Grünberg; Maryam Zaheri; Michael Huber; Riccarda Capaul; Stefan Schmutz; Verena Kufner                                                                                                                                                                                                                                                                                                                                                                                                                                                                                     |
| EPI_ISL_9740005                                                                                                                                                                                                                                                                                                                                                                                                                                                                                                                                                                 | Universitätsklinikum Münster Institut für Virologie                                 | Robert Koch Institute                                                                                   |                                                                                                                                                                                                                                                                                                                                                                                                                                                                                                                                                                                                                                                                                                           |
| EPI_ISL_9803563, EPI_ISL_9803583                                                                                                                                                                                                                                                                                                                                                                                                                                                                                                                                                | Utah Public Health Laboratory                                                       | Utah Public Health Laboratory                                                                           | Erin L. Young; John Arnn; Kelly F. Oakeson; Olinto Linares-Perdomo; Pooja Gupta; Tom Iverson                                                                                                                                                                                                                                                                                                                                                                                                                                                                                                                                                                                                              |
| EPI_ISL_9750904                                                                                                                                                                                                                                                                                                                                                                                                                                                                                                                                                                 | VOTRE LABORATOIRE COVID                                                             | CERBA HealthCare                                                                                        | Bénédicte Roquebert; Laura Verdurme; Mathilde Rousset; Sabine Trombert; Stéphanie Haim-Boukobza                                                                                                                                                                                                                                                                                                                                                                                                                                                                                                                                                                                                           |
| EPI_ISL_9790631, EPI_ISL_9790640                                                                                                                                                                                                                                                                                                                                                                                                                                                                                                                                                | Viollier AG                                                                         | Department of Biosystems Science and Engineering, ETH Zürich                                            | Andrea Patrizia Salzmann; Chaoran Chen; Christiane Beckmann; Christoph Noppen; David Dreifuss; Franziska Singer; Henriette Kurth; Ivan Topolsky; Kim Philipp Jablonski; Lara Fuhrmann; Louis du Plessis; Matteo Carrara; Maurice Redondo; Niko Beerenwinkel; Olivier Kobel; Pelin Icer; Sarah Nadeau; Shuqing Yu; Tanja Stadler                                                                                                                                                                                                                                                                                                                                                                           |
| EPI_ISL_9696458, EPI_ISL_9696459, EPI_ISL_9696460, EPI_ISL_9696461, EPI_ISL_9696462, EPI_ISL_9696466, EPI_ISL_9696472                                                                                                                                                                                                                                                                                                                                                                                                                                                           | see above                                                                           | Virology Unit, Institut Pasteur du Cambodge                                                             | Cecile Troupin; Chau Darapeak; Chin Savuth; Erik A Karlsson; Jurje Y Siegers; Kraing Sidonn; Leakhena Pum; Ly Sovann; Sophoannedh Rath; Veasna Duong; Yi Sengdoeum                                                                                                                                                                                                                                                                                                                                                                                                                                                                                                                                        |
| EPI_ISL_9791018, EPI_ISL_9791021, EPI_ISL_9791025, EPI_ISL_9791030, EPI_ISL_9791066, EPI_ISL_9791071, EPI_ISL_9791072, EPI_ISL_9791082                                                                                                                                                                                                                                                                                                                                                                                                                                          | see above                                                                           | Virology, Universitätsklinikum des Saarlandes                                                           | Jörn Walter; Kathrin Kattler; Sascha Tierling; Sigrun Smola; Thorsten Pfuhl                                                                                                                                                                                                                                                                                                                                                                                                                                                                                                                                                                                                                               |
| EPI_ISL_9612982                                                                                                                                                                                                                                                                                                                                                                                                                                                                                                                                                                 | Vithas Lab. Hospital Vithas Vigo                                                    | Microbiology Department. Complejo Hospitalario Universitario de Vigo                                    | Camacho AT; Perez s; Regueiro B                                                                                                                                                                                                                                                                                                                                                                                                                                                                                                                                                                                                                                                                           |
| EPI_ISL_9664827                                                                                                                                                                                                                                                                                                                                                                                                                                                                                                                                                                 | WSSE Katowice                                                                       | Wojewódzka Stacja Sanitarno-Epidemiologiczna w Katowicach                                               | Adrian Miara; Agata Chajda; Beata Rozwadowska; Elzbieta Bartkowiak; Marta Albertyńska                                                                                                                                                                                                                                                                                                                                                                                                                                                                                                                                                                                                                     |
| EPI_ISL_9664884, EPI_ISL_9664914                                                                                                                                                                                                                                                                                                                                                                                                                                                                                                                                                | WSSE w Krakowie                                                                     | Wojewódzka Stacja Sanitarno-Epidemiologiczna w Katowicach                                               | Adrian Miara; Agata Chajda; Beata Rozwadowska; Elzbieta Bartkowiak; Marta Albertyńska                                                                                                                                                                                                                                                                                                                                                                                                                                                                                                                                                                                                                     |
| EPI_ISL_9636601                                                                                                                                                                                                                                                                                                                                                                                                                                                                                                                                                                 | Wellington SCL (WN)                                                                 | Institute of Environmental Science and Research (ESR)                                                   | Anja Werno; Antje van der Linden; Arlo Upton; Chris Mansell; Clare Gebbie; David Hammer; Dhanisha Patel; Dragana Drinkovic; Erasmus Smit; Gary McAuliffe; Hana Sofia Andersson; Hermes Perez; James Ussher; Jill Sherwood; Jing Wang; Joep de Ligt; Josh Freeman; Julia Howard; Juliet Elvy; Lauren Jelly; Mary DeAlmeida; Matt Blakiston; Matt Storey; Matthew Rogers; Max Bloomfield; Michael Addidle; Michelle Balm; Muhammad Faisal; Nikki Freed; Olin Silander; Olivia Stroeven; Rachel Boyle; Sally Roberts; SallyAnn Harbison; Sarah Cockerton; Sarah Jefferies; Sharmini Muttaiyah; Susan Morpeth; Susan Taylor; Timothy Blackmore; Vani Sathyendran; Veronica Playle; Virginia Hope; Xiaoyun Ren |
| EPI_ISL_9651931, EPI_ISL_9651932                                                                                                                                                                                                                                                                                                                                                                                                                                                                                                                                                | ZOL                                                                                 | Jessa                                                                                                   | Severine Berden et al. on behalf of the Jessa_cmdLab                                                                                                                                                                                                                                                                                                                                                                                                                                                                                                                                                                                                                                                      |
| EPI_ISL_9742792, EPI_ISL_9742800, EPI_ISL_9742824, EPI_ISL_9742830, EPI_ISL_9742835, EPI_ISL_9742839, EPI_ISL_9742845, EPI_ISL_9742861, EPI_ISL_9742875, EPI_ISL_9742881, EPI_ISL_9742887, EPI_ISL_9742890, EPI_ISL_9742891, EPI_ISL_9744854                                                                                                                                                                                                                                                                                                                                    | see above                                                                           | alphaomega Labor GbR (Medizinische Kooperationsgemeinschaft Dres. Ackermann/Tennert/Zalß)               | Robert Koch Institute                                                                                                                                                                                                                                                                                                                                                                                                                                                                                                                                                                                                                                                                                     |
| EPI_ISL_9747477, EPI_ISL_9747480                                                                                                                                                                                                                                                                                                                                                                                                                                                                                                                                                | amedes Medlab Arnold Analytik MVZ GmbH                                              | Robert Koch Institute                                                                                   |                                                                                                                                                                                                                                                                                                                                                                                                                                                                                                                                                                                                                                                                                                           |
| EPI_ISL_9726373                                                                                                                                                                                                                                                                                                                                                                                                                                                                                                                                                                 | labopart - Medizinische Laboratorien Dresden                                        | Robert Koch Institute                                                                                   |                                                                                                                                                                                                                                                                                                                                                                                                                                                                                                                                                                                                                                                                                                           |
| EPI_ISL_9719840, EPI_ISL_9719879, EPI_ISL_9719931, EPI_ISL_9719968, EPI_ISL_9719974, EPI_ISL_9719988, EPI_ISL_9719992, EPI_ISL_9719999, EPI_ISL_9720003, EPI_ISL_9720020, EPI_ISL_9720024, EPI_ISL_9720033, EPI_ISL_9720042, EPI_ISL_9720043, EPI_ISL_9746478, EPI_ISL_9746490, EPI_ISL_9746525, EPI_ISL_9746534, EPI_ISL_9746543, EPI_ISL_9746551, EPI_ISL_9746560, EPI_ISL_9746575, EPI_ISL_9746584, EPI_ISL_9746614, EPI_ISL_9746622, EPI_ISL_9746701, EPI_ISL_9746728, EPI_ISL_9746731, EPI_ISL_9746749, EPI_ISL_9746780, EPI_ISL_9746834, EPI_ISL_9746865, EPI_ISL_9746893 | see above                                                                           | nordlab - Partnerschaftspraxis für Laboratoriumsmedizin                                                 | Robert Koch Institute                                                                                                                                                                                                                                                                                                                                                                                                                                                                                                                                                                                                                                                                                     |
